# Supplementary material
Source: PubMed Central journal article supplement (PMC3624796)
Supplement: jm301823g_si_001.pdf [file jm301823g_si_001.pdf]

**Supporting Information for**  
**The Impact of Introducing a Histidine into an**  
**Apolar Cavity Site on Docking and Ligand Recognition**

Matthew Merski & Brian K. Shoichet\*

Dept. of Pharmaceutical Chemistry, University of California San Francisco

1700 4<sup>th</sup> St., San Francisco CA 94158-2550

To whom correspondence should be addressed: Brian Shoichet,

Dept. of Pharmaceutical Chemistry, University of California, San Francisco, 1700 4<sup>th</sup> St.

San Francisco, CA 94158-2330, email: shoichet@cgl.ucsf.edu

Contains the complete crystallographic table for protein ligand complex structures reported, 2D images of the molecules tested and their docking scores, graphical representations of the relationship between  $\Delta T_m$  and binding affinity or docking rank, a truth table comparing the ability of molecular docking, a 1D chemotype and total polar surface area to predict ligands, as well as a list of the 10,000 molecules in the top of the docking ranked list with scores separated into individual terms (van der Waals, electrostatic interactions, polar and non-polar desolvation).

## SI Figure 1

### True Positives

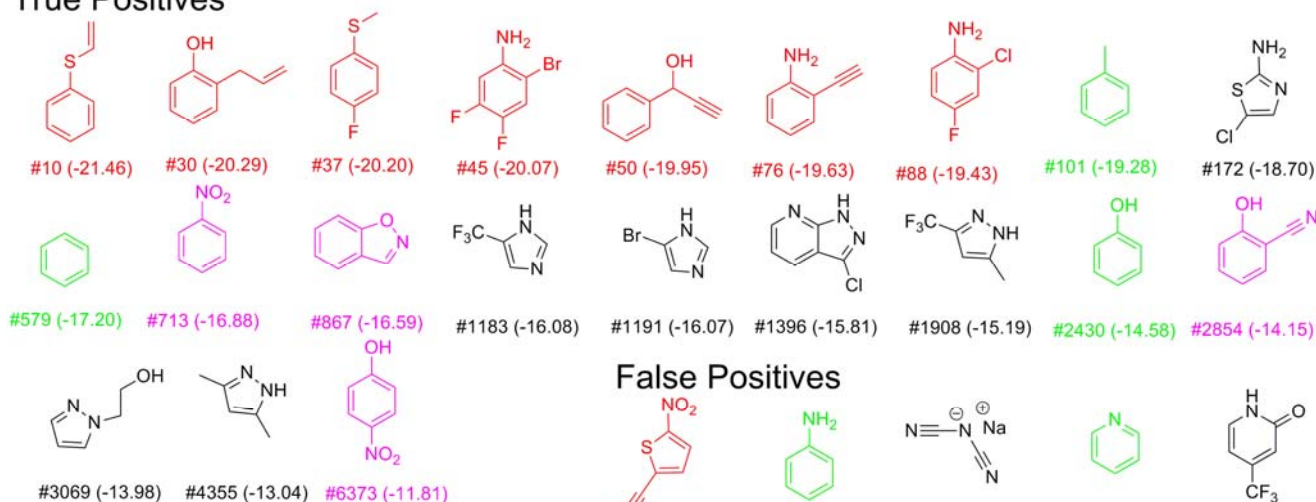

### True Negatives

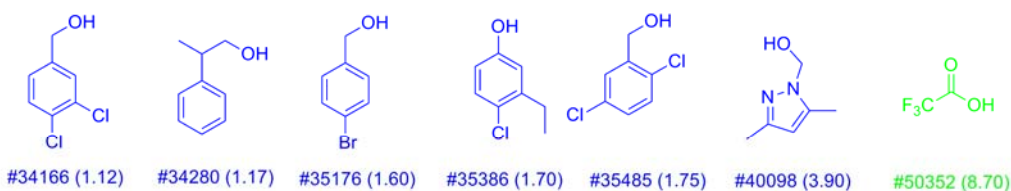

### False Negatives

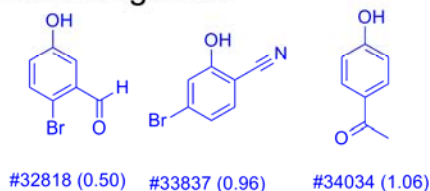

**SI Figure 1:** The molecules tested for L99A/M102H† binding reported here. The molecules are grouped into docking true positives (ligands ranked in the top 1% of the docking list), docking false positives (non-ligands ranked in the top 1% of the list), docking true negatives (non-ligands not present in the top 5% of the list) and docking false negatives (ligands not ranked in the top 5% of the list). Molecules are colored according to the reason they were chosen. Red molecules (high scoring set) scored in the top 100 of all molecules overall. Black molecules (dissimilar set) scored in the top 1% and had a low Tanimoto coefficient to the set of known cavity ligands. Violet molecules (previously known set) were known from a previous study on L99A/M102H†<sup>1</sup>. Green molecules (*prima facie* set) were chosen due to high similarity to lysozyme cavity ligands that bind one or more of previously described model lysozyme cavities. Blue molecules (possible docking failures set) were chosen because they matched to 1D chemotype of discovered L99A/M102H† ligands. 2-mercaptoethanol, a ligand was ranked in the intermediate range between the true positives (1%) and false negatives (5%) and is not included on this list due to that ambiguity.

SI Figure 2

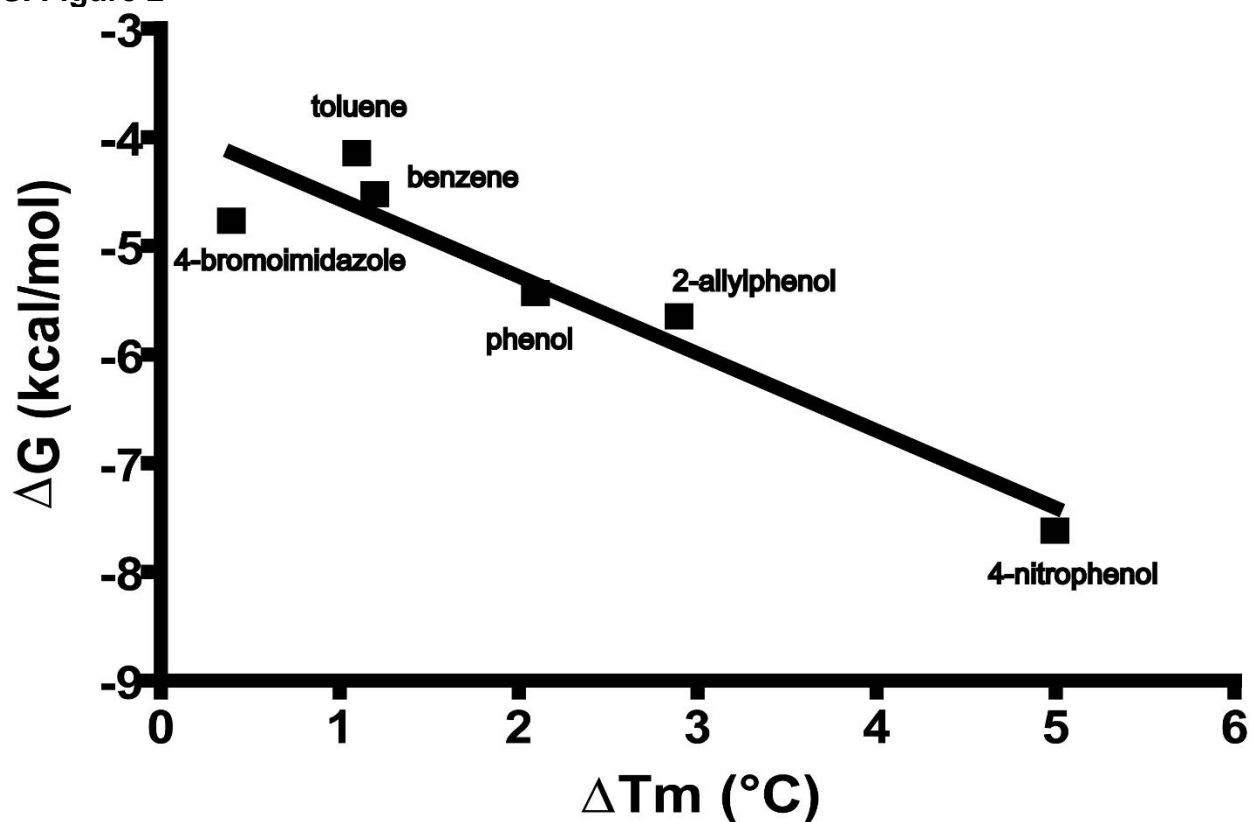

**SI Figure 2:** There is a good correlation between the  $\Delta T_M$  (measured by CD, pH 5.4) and  $\Delta G_{\text{bind}}$  (measured by ITC, 25 °C, pH 5.0) of ligands to the L99A/M102H† cavity ( $R^2 = 0.897$ , slope =  $-0.71 \text{ kcal mol}^{-1} \text{ } ^\circ\text{C}^{-1}$ ).

SI Figure 3

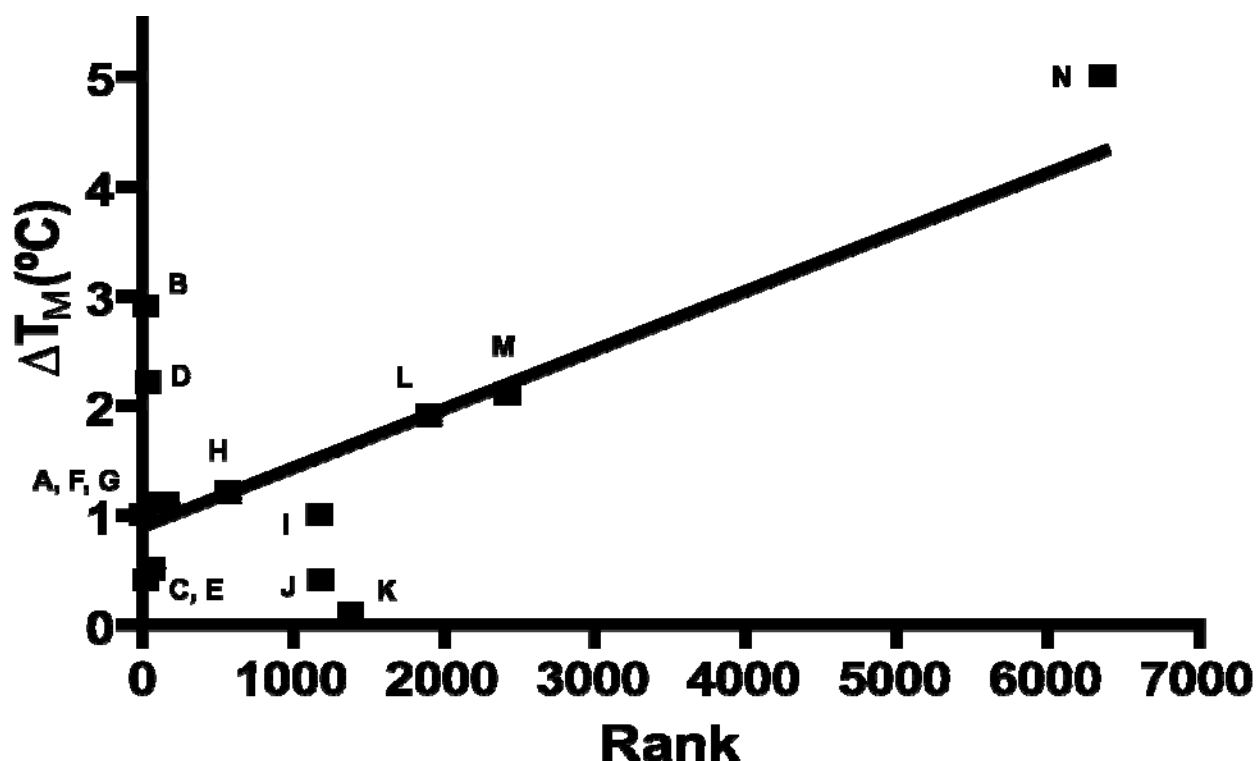

**SI Figure 3:** An illustration of the dependence of docking rank with  $\Delta T_M$  (measured by CD, pH 5.4). The fit line ( $R^2 = 0.511$ , slope =  $5 \times 10^{-4}$  ranks  $^{\circ}\text{C}^{-1}$ ) shows that unlike SI Figure 2, which shows that the relationship between  $\Delta T_M$  and  $\Delta G_{\text{bind}}$  (measured by ITC, 25  $^{\circ}\text{C}$ , pH 5.0), there is not a good correlation between docking rank and  $\Delta T_M$ . The points correspond as follows: **A)** phenyl vinyl sulfide **B)** 2-allyl phenol **C)** 4-fluorothioanisole **D)** 1-phenyl-2-propyn-1-ol **E)** 2-ethynylaniline **F)** toluene **G)** 2-amino-5-chloro thiazole **H)** benzene **I)** 4-trifluoromethyl imidazole **J)** 4-bromoimidazole **K)** 3-chloro-1H-pyrazolo[3,4b] pyridine **L)** 3-methyl-5-(trifluoromethyl) pyrazole **M)** phenol **N)** 4-nitrophenol

SI Figure 4

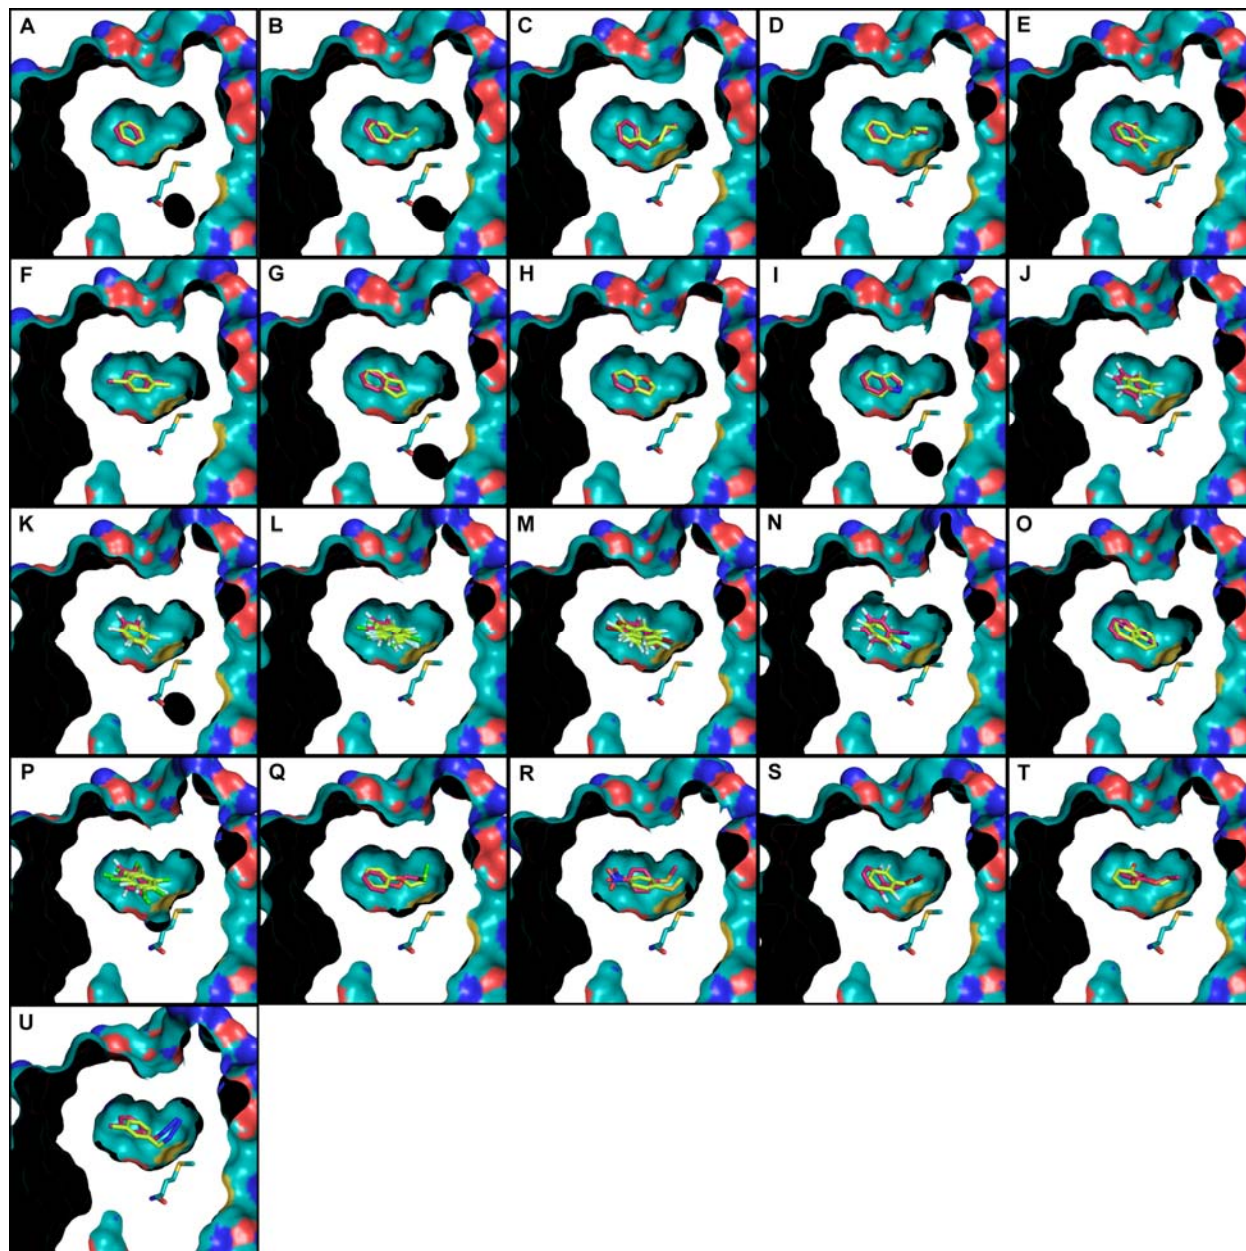

**SI Figure 4:** Comparison of the crystallographic and DOCK generated poses of the L99A crystallographic ligands. In all cases oxygens are represented in red, nitrogens blue, fluorines white, iodine and bromine purple, and sulfurs yellow. A cut-away of the crystallographically determined protein structure (and surface) is shown with cyan carbons, the crystallographically determined ligand carbons are light yellow and the DOCK predicted poses are represented with magenta carbons. The side of the surface occupied entirely by the protein is in black. Met102 and the ligands are shown in a stick representation. The figure was rendered with PyMol. In all cases the ligand binding cavity is completely physically isolated from bulk solvent. Docking was performed

against PDB 181L<sup>2</sup>. There were only minute changes in the binding site between the different crystal structures. Crystal structures with multiple ligand poses were all matched to the dock pose; RMSD values are given in ascending order in those cases.

**A)** PDB ID 181L<sup>2</sup>, RMSD =0.583 Å **B)** PDB ID 1NHB<sup>2</sup>, RMSD =0.822 Å **C)** PDB ID 186L<sup>2</sup>, RMSD =1.086 Å **D)** PDB ID 184L<sup>2</sup>, RMSD =0.779 Å **E)** PDB ID 188L<sup>2</sup>, RMSD =1.812 Å **F)** PDB ID 187L<sup>2</sup>, RMSD =0.847 Å **G)** PDB ID 183L<sup>2</sup>, RMSD =1.026 Å **H)** PDB ID 182L<sup>2</sup>, RMSD =0.286 Å **I)** PDB ID 185L<sup>2</sup>, RMSD =0.344 Å **J)** PDB ID 3DMZ<sup>3</sup>, RMSD =1.472 Å **K)** PDB ID 3DN0<sup>3</sup>, RMSD =1.871/3.291 Å **L)** PDB ID 3DN1<sup>3</sup>, RMSD =1.341/2.099/2.454/3.054/3.476/3.854 Å **M)** PDB ID 3DN2<sup>3</sup>, RMSD =2.084/2.928/2.978 Å **N)** PDB ID 3DN3<sup>3</sup>, RMSD =1.153 Å **O)** PDB ID 3DN4<sup>3</sup>, RMSD =0.838/2.808 Å **P)** PDB ID 3DN6<sup>3</sup>, RMSD =1.017/4.552 Å **Q)** PDB ID 2RAY<sup>4</sup>, RMSD =0.749 Å **R)** PDB ID 2RAZ<sup>4</sup>, RMSD =1.486 Å **S)** PDB ID 2RB0<sup>4</sup>, RMSD =1.020 Å **T)** PDB ID 2RB1<sup>4</sup>, RMSD =1.946 Å **U)** PDB ID 2RB2<sup>4</sup>, RMSD =1.10 Å

## SI Figure 5

|            |          | Docking |       |
|------------|----------|---------|-------|
|            |          | True    | False |
| Ligand ??? | Positive | 21      | 5     |
|            | Negative | 7       | 3     |

|            |          | 1D Chemotype |       |
|------------|----------|--------------|-------|
|            |          | True         | False |
| Ligand ??? | Positive | 18           | 7     |
|            | Negative | 5            | 6     |

|            |          | Polar Surface Area |       |
|------------|----------|--------------------|-------|
|            |          | True               | False |
| Ligand ??? | Positive | 16                 | 4     |
|            | Negative | 8                  | 8     |

**SI Figure 5:** Truth tables comparing various methods for ligand discovery in L99A/M102H†, from right to left, molecular docking (DOCK 3.6), a 1D chemotype (fewer than 10 non-hydrogen atoms, at least one polar atom, and neutral), and the polar surface area of the ligands (MollInspiration<sup>5</sup>, ligands had polar surface area between 26 and 46 Å<sup>2</sup>). Ligands were chosen prospectively by docking and retrospectively in the other two cases. Ligands are listed as true positives (a correctly predicted ligand), true negative (correctly predicted to not be a ligand), false positives (incorrectly predicted to be a ligand) and false negatives (incorrectly predicted to not be a ligand). Docking outperformed the 1D chemotyping method by virtue of the additional steric information contained in the receptor and the polar surface area method by correctly identifying the non-polar ligands. 36 ligands are listed in the truth table. The 37<sup>th</sup> ligand, 2-mercaptoethanol, found fortuitously by initial crystal screening and present in Table 3 of the main text has a DOCK rank of 12,241. This placed it in the intermediate range between the true positives (1%) and false negatives (5%) and is not included in the truth tables due to that ambiguity.

SI Table 1- XTAL data

| Complex                                  | L99A/M102H†/benzene | L99A/M102H†/toluene | L99A/M102H†/phenol  | L99A/M102H†/2-allyl phenol |
|------------------------------------------|---------------------|---------------------|---------------------|----------------------------|
| <b>PDB entry</b>                         | 4I7J                | 4I7K                | 4I7L                | 4I7M                       |
| <b>Data Collection &amp; Processing</b>  |                     |                     |                     |                            |
| Crystals Used                            | 1                   | 1                   | 1                   | 1                          |
| Wavelength [Å]                           | 1.116               | 1.116               | 1.116               | 1.116                      |
| Space Group                              | P2 <sub>1</sub>     | P2 <sub>1</sub>     | P2 <sub>1</sub>     | P2 <sub>1</sub>            |
| <b>Unit Cell Parameters</b>              |                     |                     |                     |                            |
| a, b, c [Å]                              | 48.39, 75.58, 52.60 | 48.32, 75.55, 52.76 | 48.44, 75.37, 52.68 | 48.30, 75.09, 52.76        |
| α, β, γ [°]                              | 90.00, 93.28, 90.00 | 90.00, 93.22, 90.00 | 90.00, 93.31, 90.00 | 90.00, 93.08, 90.00        |
| Matthews Coefficient[Å <sup>3</sup> /Da] | 2.25                | 2.25                | 2.25                | 2.24                       |
| Solvent Content [%]                      | 45.3                | 45.4                | 45.3                | 45.0                       |
| <b>Diffraction Data</b>                  |                     |                     |                     |                            |
| Resolution Range [Å]                     | 50-1.63 (1.73-1.63) | 50-1.70 (1.80-1.70) | 50-1.49 (1.58-1.49) | 50-1.40 (1.48-1.40)        |
| Unique Reflections                       | 44,127 (7,216)      | 40,876 (6,592)      | 59,483 (9,634)      | 71,974 (10,932)            |
| R(I)sym [%]                              | 6.6 (36.4)          | 6.7 (37.7)          | 5.1 (35.5)          | 6.0 (78.0)                 |
| Completeness [%]                         | 93.1 (94.4)         | 98.0 (98.2)         | 96.3 (96.7)         | 96.3 (90.8)                |
| Redundancy                               | 2.6 (2.5)           | 2.6 (2.5)           | 2.6 (2.5)           | 2.6 (2.5)                  |
| I/σ(I)                                   | 11.9 (2.6)          | 12.5 (2.8)          | 14.1 (2.7)          | 10.4 (1.3)                 |
| <b>Refinement</b>                        |                     |                     |                     |                            |
| Resolution Range [Å]                     | 48.3-1.67           | 48.2-1.72           | 48.4-1.52           | 43.1-1.48                  |
| Reflections Used (work/free)             | 40,933/1,636        | 39,514/1,570        | 56,080/2,247        | 60,991/2,437               |
| Final R Values (work/free)[%]            | 20.48/23.93         | 16.79/20.05         | 16.10/18.08         | 17.43/19.81                |
| Protein Residues                         | 348                 | 350                 | 351                 | 349                        |
| Ligand Atoms                             | 12                  | 28                  | 14                  | 20                         |
| Water Molecules                          | 265                 | 325                 | 353                 | 298                        |
| <b>RMSDs</b>                             |                     |                     |                     |                            |
| Bonds[Å]                                 | 0.012               | 0.012               | 0.013               | 0.021                      |
| Angles[°]                                | 1.4                 | 1.5                 | 1.4                 | 1.8                        |
| <b>Ramachandran plot: residues in:</b>   |                     |                     |                     |                            |
| Favored (98%) regions [%]                | 98.9                | 98.9                | 99.5                | 99.2                       |
| Allowed (>99.8%) regions [%]             | 100.0               | 100.0               | 100.0               | 100.0                      |
| <b>Mean B-Factor [Å<sup>2</sup>]</b>     |                     |                     |                     |                            |
| Protein                                  | 12.8                | 14.1                | 13.4                | 17.5                       |
| Ligand                                   | 7.4                 | 8.5                 | 10.6                | 16.1                       |
| Water Molecules                          | 19.7                | 23.7                | 24.4                | 27.1                       |



| Complex                                  | L99A/M102H†/<br>1-phenyl-2-propyn-1-ol | L99A/M102H†/<br>2-amino-5-chlorothiazole | L99A/M102H†/<br>4-bromoimidazole | L99A/M102H†/<br>4-trifluoromethyl<br>imidazole |
|------------------------------------------|----------------------------------------|------------------------------------------|----------------------------------|------------------------------------------------|
| <b>PDB entry</b>                         | 4I7N                                   | 4I7O                                     | 4I7P                             | 4I7Q                                           |
| <b>Data Collection &amp; Processing</b>  |                                        |                                          |                                  |                                                |
| Crystals Used                            | 1                                      | 1                                        | 1                                | 1                                              |
| Wavelength [Å]                           | 1.116                                  | 1.116                                    | 1.116                            | 1.116                                          |
| Space Group                              | P2 <sub>1</sub>                        | P2 <sub>1</sub>                          | P2 <sub>1</sub>                  | P2 <sub>1</sub>                                |
| <b>Unit Cell Parameters</b>              |                                        |                                          |                                  |                                                |
| a, b, c [Å]                              | 48.63, 75.14, 52.72                    | 48.32, 75.34, 52.76                      | 48.37, 75.40, 52.70              | 48.57, 75.31, 52.65                            |
| α, β, γ [°]                              | 90.00, 93.18, 90.00                    | 90.00, 93.22, 90.00                      | 90.00, 93.17, 90.00              | 90.00, 93.28, 90.00                            |
| Matthews Coefficient[Å <sup>3</sup> /Da] | 2.25                                   | 2.24                                     | 2.24                             | 2.25                                           |
| Solvent Content [%]                      | 45.4                                   | 45.2                                     | 45.2                             | 45.4                                           |
| <b>Diffraction Data</b>                  |                                        |                                          |                                  |                                                |
| Resolution Range [Å]                     | 50-1.55 (1.64-1.55)                    | 50-1.69 (1.79-1.69)                      | 50-1.55 (1.65-1.55)              | 50-1.53 (1.62-1.53)                            |
| Unique Reflections                       | 52,560 (7,397)                         | 40,306 (6,526)                           | 52,367 (8,523)                   | 55,463 (8,676)                                 |
| R(I)sym [%]                              | 5.3 (42.9)                             | 5.9 (40.1)                               | 7.1 (43.6)                       | 5.7 (38.8)                                     |
| Completeness [%]                         | 95.7 (83.6)                            | 95.0 (95.1)                              | 95.8 (96.7)                      | 96.5 (93.3)                                    |
| Redundancy                               | 2.4 (1.8)                              | 2.6 (2.4)                                | 2.6 (2.5)                        | 2.5 (2.4)                                      |
| I/σ(I)                                   | 12.9 (1.9)                             | 13.6 (2.5)                               | 11.0 (2.5)                       | 11.7 (2.4)                                     |
| <b>Refinement</b>                        |                                        |                                          |                                  |                                                |
| Resolution Range [Å]                     | 48.6-1.58                              | 48.2-1.73                                | 48.3-1.60                        | 48.5-1.58                                      |
| Reflections Used (work/free)             | 50,322/2,006                           | 37,583/1,499                             | 48,060/1,918                     | 50,441/2,033                                   |
| Final R Values (work/free)[%]            | 17.47/20.17                            | 16.84/19.40                              | 17.94/20.42                      | 18.84/21.32                                    |
| Protein Residues                         | 349                                    | 349                                      | 350                              | 349                                            |
| Ligand Atoms                             | 20                                     | 14                                       | 12                               | 18                                             |
| Water Molecules                          | 302                                    | 286                                      | 285                              | 282                                            |
| <b>RMSDs</b>                             |                                        |                                          |                                  |                                                |
| Bonds[Å]                                 | 0.017                                  | 0.006                                    | 0.013                            | 0.010                                          |
| Angles[°]                                | 1.6                                    | 1.0                                      | 1.4                              | 1.3                                            |
| <b>Ramachandran plot: residues in:</b>   |                                        |                                          |                                  |                                                |
| Favored (98%) regions [%]                | 99.5                                   | 99.2                                     | 99.2                             | 99.4                                           |
| Allowed (>99.8%) regions [%]             | 100.0                                  | 100.0                                    | 100.0                            | 100.0                                          |
| <b>Mean B-Factor [Å<sup>2</sup>]</b>     |                                        |                                          |                                  |                                                |
| Protein                                  | 14.7                                   | 15.3                                     | 13.5                             | 14.3                                           |
| Ligand                                   | 8.5                                    | 18.0                                     | 9.0                              | 9.1                                            |
| Water Molecules                          | 25.3                                   | 25.3                                     | 22.0                             | 24.2                                           |

| Complex                                  | L99A/M102H†/<br>2-(pyrazolo-1-yl) ethanol | L99A/M102H†/<br>3-trifluoromethyl-5-methyl<br>pyrazole | L99A/M102H†/<br>2-bromo-5-<br>hydroxybenzaldehyde |
|------------------------------------------|-------------------------------------------|--------------------------------------------------------|---------------------------------------------------|
| <b>PDB entry</b>                         | 4I7R                                      | 4I7S                                                   | 4I7T                                              |
| <b>Data Collection &amp; Processing</b>  |                                           |                                                        |                                                   |
| Crystals Used                            | 1                                         | 1                                                      | 1                                                 |
| Wavelength [Å]                           | 1.116                                     | 1.116                                                  | 1.116                                             |
| Space Group                              | P2 <sub>1</sub>                           | P2 <sub>1</sub>                                        | P2 <sub>1</sub>                                   |
| <b>Unit Cell Parameters</b>              |                                           |                                                        |                                                   |
| a, b, c [Å]                              | 48.59, 75.37, 52.63                       | 48.58, 75.59, 52.60                                    | 48.06, 75.81, 52.71                               |
| α, β, γ [°]                              | 90.00, 93.25, 90.00                       | 90.00, 93.13, 90.00                                    | 90.00, 93.11, 90.00                               |
| Matthews Coefficient[Å <sup>3</sup> /Da] | 2.25                                      | 2.26                                                   | 2.24                                              |
| Solvent Content [%]                      | 45.4                                      | 45.5                                                   | 45.2                                              |
| <b>Diffraction Data</b>                  |                                           |                                                        |                                                   |
| Resolution Range [Å]                     | 50-1.48 (1.57-1.48)                       | 50-1.64 (1.74-1.64)                                    | 50-1.50 (1.59-1.50)                               |
| Unique Reflections                       | 58,809 (9,763)                            | 45,870 (7,358)                                         | 56,323 (7,219)                                    |
| R(I)sym [%]                              | 4.6 (40.3)                                | 6.0 (38.5)                                             | 5.5 (44.7)                                        |
| Completeness [%]                         | 93.5 (96.3)                               | 98.6 (98.2)                                            | 92.7 (73.9)                                       |
| Redundancy                               | 2.7 (2.5)                                 | 2.5 (2.5)                                              | 2.5 (2.0)                                         |
| I/σ(I)                                   | 15.8 (2.5)                                | 12.8 (2.6)                                             | 13.9 (2.1)                                        |
| <b>Refinement</b>                        |                                           |                                                        |                                                   |
| Resolution Range [Å]                     | 48.5-1.52                                 | 48.5-1.69                                              | 48.0-1.55                                         |
| Reflections Used (work/free)             | 54,399/2,170                              | 42,019/1,677                                           | 52,336/2,103                                      |
| Final R Values (work/free)[%]            | 16.95/19.03                               | 16.89/19.57                                            | 17.47/19.85                                       |
| Protein Residues                         | 349                                       | 349                                                    | 349                                               |
| Ligand Atoms                             | 16                                        | 20                                                     | 20                                                |
| Water Molecules                          | 335                                       | 355                                                    | 320                                               |
| <b>RMSDs</b>                             |                                           |                                                        |                                                   |
| Bonds[Å]                                 | 0.010                                     | 0.014                                                  | 0.021                                             |
| Angles[°]                                | 1.3                                       | 1.4                                                    | 1.9                                               |
| <b>Ramachandran plot: residues in:</b>   |                                           |                                                        |                                                   |
| Favored (98%) regions [%]                | 99.4                                      | 99.5                                                   | 98.9                                              |
| Allowed (>99.8%) regions [%]             | 100.0                                     | 100.0                                                  | 100.0                                             |
| <b>Mean B-Factor [Å<sup>2</sup>]</b>     |                                           |                                                        |                                                   |
| Protein                                  | 13.7                                      | 13.4                                                   | 15.3                                              |
| Ligand                                   | 12.5                                      | 11.4                                                   | 15.0                                              |
| Water Molecules                          | 24.3                                      | 23.0                                                   | 25.8                                              |

SI Table 2- DOCK Scores

| Docking True Positives                                                                                              | Rank | Electrostatics | VDW    | Polar Desolvation | Non-Polar Desolvation | Total DOCK Score |
|---------------------------------------------------------------------------------------------------------------------|------|----------------|--------|-------------------|-----------------------|------------------|
| phenyl vinyl sulfide<br>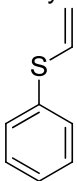           | 10   | 0.2            | -19.37 | 2.25              | -4.55                 | -21.46           |
| 2-allyl phenol<br>                 | 30   | -0.87          | -19.4  | 2.78              | -2.8                  | -20.29           |
| 4-fluorothioanisole<br>           | 37   | 0.01           | -18.24 | 2.24              | -4.22                 | -20.2            |
| 2-bromo-4,5-difluoro aniline<br> | 45   | -3.46          | -16.76 | 2.55              | -2.39                 | -20.07           |
| 1-phenyl-2-propyn-1-ol<br>       | 50   | -0.72          | -20.06 | 3.35              | -2.52                 | -19.95           |

|                                                                                                                |     |       |        |      |       |        |
|----------------------------------------------------------------------------------------------------------------|-----|-------|--------|------|-------|--------|
| 2-ethynylaniline<br>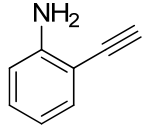          | 76  | -1.95 | -18.35 | 3.34 | -2.67 | -19.63 |
| 2-chloro-4-fluoroaniline<br>  | 88  | -2.71 | -16.86 | 2.38 | -2.23 | -19.43 |
| toluene<br>                   | 101 | -0.91 | -15.94 | 1.4  | -3.84 | -19.28 |
| 2-amino-5-chloro thiazole<br> | 172 | -4.35 | -16.02 | 3.01 | -1.34 | -18.70 |
| benzene<br>                  | 579 | -0.7  | -14.48 | 1.34 | -3.35 | -17.2  |
| nitrobenzene<br>            | 713 | -2.56 | -16.02 | 5.55 | -3.85 | -16.88 |
| 1,2-benzisoxazole<br>       | 867 | -2.47 | -17.42 | 6.19 | -2.9  | -16.59 |

|                                                                                                                            |      |       |        |      |       |        |
|----------------------------------------------------------------------------------------------------------------------------|------|-------|--------|------|-------|--------|
| 4-trifluoromethyl imidazole<br>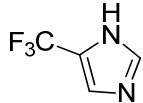           | 1183 | -4.96 | -15.53 | 6.85 | -2.43 | -16.08 |
| 4-bromoimidazole<br>                      | 1191 | -4.48 | -15.26 | 5.77 | -2.09 | -16.07 |
| 3-chloro-1H-pyrazolo[3,4b]pyridine<br>    | 1399 | -1.88 | -16.9  | 5.07 | -2.1  | -15.81 |
| 3-methyl-5-(trifluoromethyl) pyrazole<br> | 1908 | -0.77 | -15.13 | 2.7  | -1.98 | -15.19 |
| phenol<br>                                | 2430 | -3.01 | -14.55 | 4.19 | -1.21 | -14.58 |
| 2-hydroxybenzonitrile<br>                | 2854 | 0.02  | -18.31 | 5.63 | -1.49 | -14.15 |
| 2-(pyrazolo-1-yl) ethanol<br>           | 3069 | -3.29 | -15.86 | 4.81 | 0.35  | -13.98 |
| 3,5-dimethyl pyrazole<br>               | 4355 | -1.87 | -13.58 | 4.1  | -1.7  | -13.04 |

|                                                                                                                     |       |       |        |      |       |        |
|---------------------------------------------------------------------------------------------------------------------|-------|-------|--------|------|-------|--------|
| <p>4-nitrophenol</p> 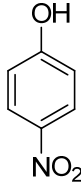              | 6373  | -1.44 | -14.19 | 5.45 | -1.64 | -11.81 |
| <b>Docking True Negatives</b>                                                                                       |       |       |        |      |       |        |
| <p>3,4-dichlorobenzyl alcohol</p>  | 34166 | -3.97 | -0.01  | 3.69 | 1.4   | 1.12   |
| <p>2-phenyl-1-propanol</p>         | 34280 | -1.57 | -0.58  | 2.56 | 0.76  | 1.17   |
| <p>3-bromobenzyl alcohol</p>      | 35176 | -0.72 | -2.55  | 3.24 | 1.64  | 1.6    |
| <p>4-chloro-3-ethyl phenol</p>   | 35386 | -1.06 | -0.11  | 2.52 | 0.35  | 1.7    |

|                                                                                                                      |       |       |        |       |       |        |
|----------------------------------------------------------------------------------------------------------------------|-------|-------|--------|-------|-------|--------|
| 2,5-dichlorobenzyl alcohol<br>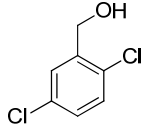      | 35485 | -1.83 | -0.1   | 2.56  | 1.13  | 1.75   |
| 3,4-dimethylpyrazole-1-methanol<br> | 40098 | -0.29 | -3.47  | 7.22  | 0.44  | 3.9    |
| trifluoroacetic acid<br>            | 50352 | -3.32 | -12.51 | 25.72 | -1.2  | 8.7    |
| <b>Docking False Positives</b>                                                                                       |       |       |        |       |       |        |
| 5-nitrothiophene-2-carbonitrile<br> | 19    | -1.9  | -20.27 | 4.84  | -3.59 | -20.93 |
| aniline<br>                        | 301   | -1.76 | -16.4  | 1.9   | -1.81 | -18.06 |
| dicyanamide, sodium salt<br>      | 1482  | -5.48 | -10.07 | 4.81  | -4.97 | -15.71 |
| pyridine<br>                      | 1970  | -1.22 | -14.71 | 2.91  | -2.06 | -15.09 |

|                                                                                                                       |       |       |        |      |       |        |
|-----------------------------------------------------------------------------------------------------------------------|-------|-------|--------|------|-------|--------|
| 4-(trifluoromethyl) pyridin-2-ol<br>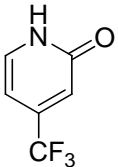 | 2114  | -4.8  | -16.48 | 8.19 | -1.83 | -14.92 |
| <b>Docking False Negatives</b>                                                                                        |       |       |        |      |       |        |
| 2-bromo-5-hydroxybenzaldehyde<br>    | 32818 | -1.85 | -2.08  | 5.83 | -1.4  | 0.5    |
| 5-bromo-2-cyanophenol<br>            | 33837 | -1.76 | -2.22  | 4.73 | 0.21  | 0.96   |
| 4-hydroxyacetophenone<br>           | 34034 | -2.23 | -0.94  | 5.73 | -1.5  | 1.06   |

**SI Table 2:** The individual components of the DOCK scoring function<sup>4</sup> (electrostatics, van der Waals interaction, polar and non-polar desolvation) shown for each of the tested molecules. This DOCK run used SEV desolvation on a set comprised of 650,000 purchasable small molecules with molecular weight less than 250 Daltons. 2-mercaptoethanol, a ligand was ranked in the intermediate range between the true positives (1%) and false negatives (5%) and is not included on this list due to that ambiguity.



SI Table 3

| Ligands                                                                                                            | Strd. Rank | Strd. Score | +0.4 e <sup>-</sup> Rank | +0.4 e <sup>-</sup> Score | +0.8 e <sup>-</sup> Rank | +0.8 e <sup>-</sup> Score | Scale VdW Rank | Scale VdW Score | Scale Elec. Rank | Scale Elec. Score | L99A Rank |
|--------------------------------------------------------------------------------------------------------------------|------------|-------------|--------------------------|---------------------------|--------------------------|---------------------------|----------------|-----------------|------------------|-------------------|-----------|
| phenyl vinyl sulfide<br>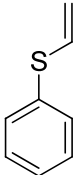          | 10         | -21.47      | 160                      | -20.66                    | 1578                     | -19.91                    | 36             | -11.68          | 244              | -19.59            | 3         |
| 2-allyl phenol<br>                | 30         | -20.29      | 595                      | -18.9                     | 2401                     | -18.81                    | 218            | -10.4           | 367              | -19               | 59        |
| 4-fluorothioanisole<br>           | 37         | -20.21      | 327                      | -19.72                    | 1776                     | -19.58                    | 98             | -11             | 4022             | -13.58            | 89        |
| 2-bromo-4,5-difluoro aniline<br> | 45         | -20.06      | 78                       | -21.49                    | 268                      | -23.54                    | 50             | -11.5           | 60               | -21.39            | 872       |
| 1-phenyl-2-propyn-1-ol<br>      | 50         | -19.95      | 336                      | -19.68                    | 765                      | -21.51                    | 388            | -9.86           | 196              | -19.9             | 46        |

|                                                                                                                |     |        |      |         |      |        |      |        |      |        |      |
|----------------------------------------------------------------------------------------------------------------|-----|--------|------|---------|------|--------|------|--------|------|--------|------|
| 2-ethynylaniline<br>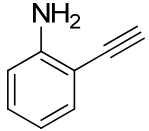          | 76  | -19.63 | 206  | -20.36  | 972  | -21    | 176  | -10.55 | 90   | -20.96 | 417  |
| 2-chloro-4-fluoroaniline<br>  | 88  | -19.42 | 201  | -20.39  | 670  | -21.8  | 118  | -10.82 | 2068 | -15.69 | 262  |
| toluene<br>                   | 101 | -19.29 | 367  | -19.59  | 1543 | -19.96 | 70   | -11.27 | 287  | -19.4  | 57   |
| 2-amino-5-chloro thiazole<br> | 172 | -18.7  | 728  | -18.63  | 332  | -23.13 | 1869 | -7.95  | 380  | -18.95 | 811  |
| benzene<br>                  | 579 | -17.19 | 1452 | -17.35  | 3688 | -17.55 | 356  | -9.94  | 990  | -17.4  | 452  |
| nitrobenzene<br>            | 713 | -16.88 | 933  | -18.16  | 1493 | -20.04 | 1015 | -8.8   | 1411 | -16.66 | 436  |
| 1,2-benzisoxazole<br>       | 867 | -16.6  | 1326 | -175.51 | 2502 | -18.71 | 2031 | -7.81  | 1834 | -16.03 | 1004 |

|                                                                                                                            |      |        |      |        |      |        |      |       |      |        |      |
|----------------------------------------------------------------------------------------------------------------------------|------|--------|------|--------|------|--------|------|-------|------|--------|------|
| 4-trifluoromethyl imidazole<br>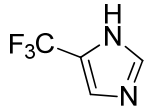           | 1183 | -16.07 | 289  | -19.89 | 163  | -24.54 | 1331 | -8.47 | 84   | -21.02 | 2440 |
| 4-bromoimidazole<br>                      | 1191 | -16.06 | 451  | -19.31 | 278  | -23.46 | 1192 | -8.6  | 428  | -18.79 | 2640 |
| 3-chloro-1H-pyrazolo[3,4b]pyridine<br>    | 1399 | -15.81 | 4437 | -14.53 | 9360 | -13.84 | 2859 | -7.25 | 984  | -17.41 | 536  |
| 3-methyl-5-(trifluoromethyl) pyrazole<br> | 1908 | -15.18 | 857  | -18.33 | 797  | -21.44 | 1539 | -8.26 | 414  | -18.85 | 3254 |
| phenol<br>                                | 2430 | -14.58 | 1413 | -17.39 | 1579 | -19.91 | 1660 | -8.14 | 2086 | -15.67 | 1540 |
| 2-cyanophenol<br>                        | 2854 | -14.15 | 5043 | -14.12 | 6821 | -15.27 | 7900 | -4.99 | 4468 | -13.2  | 995  |
| 2-(pyrazolo-1-yl) ethanol<br>           | 3069 | -13.99 | 2367 | -16.26 | 1763 | -19.59 | 4422 | -6.38 | 1172 | -17.04 | 6451 |
| 3,5-dimethyl pyrazole<br>               | 4355 | -13.05 | 3585 | -15.16 | 3364 | -17.84 | 3845 | -6.66 | 2252 | -15.45 | 5132 |

|                                                                                                                            |       |        |       |        |       |        |       |        |       |        |       |
|----------------------------------------------------------------------------------------------------------------------------|-------|--------|-------|--------|-------|--------|-------|--------|-------|--------|-------|
| <p>4-nitrophenol</p> 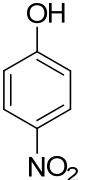                     | 6373  | -11.82 | 7172  | -12.82 | 8657  | -14.22 | 8340  | -4.83  | 5040  | -12.74 | 6740  |
| <p>2-bromo-5-hydroxybenzaldehyde</p>      | 32818 | 0.5    | 34234 | -0.15  | 31804 | -3.44  | 30455 | 1.46   | 33422 | 5.14   | 23604 |
| <p>5-bromo-2-hydroxybenzonitrile</p>      | 33837 | 0.96   | 37376 | 1.41   | 39681 | 0.23   | 34323 | 2.53   | 40523 | 9.52   | 35078 |
| <p>4-hydroxyacetophenone</p>             | 34034 | 1.06   | 35061 | 0.26   | 37349 | -0.83  | 32297 | 1.97   | 31678 | 4.02   | 26739 |
| <b>Non-Ligands</b>                                                                                                         |       |        |       |        |       |        |       |        |       |        |       |
| <p>5-nitrothiophene-2-carbonitrile</p>  | 19    | -20.92 | 40    | -22.17 | 309   | -23.27 | 134   | -10.71 | 48    | -21.7  | 2852  |

|                                                                                                                       |       |        |       |        |       |        |       |        |       |        |       |
|-----------------------------------------------------------------------------------------------------------------------|-------|--------|-------|--------|-------|--------|-------|--------|-------|--------|-------|
| aniline<br>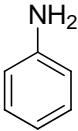                          | 301   | -18.07 | 446   | -19.32 | 1010  | -20.92 | 290   | -10.13 | 168   | -20.1  | 295   |
| dicyanamide, sodium salt<br>         | 1482  | -15.71 | 88    | -21.34 | 33    | -27.87 | 75    | -11.21 | 1127  | -17.12 | 3572  |
| pyridine<br>                         | 1970  | -15.08 | 3145  | -15.54 | 4504  | -16.84 | 2153  | -7.71  | 2142  | -15.59 | 2187  |
| 4-(trifluoromethyl) pyridin-2-ol<br> | 2114  | -14.92 | 1208  | -17.67 | 477   | -22.44 | 3995  | 6.59   | 349   | -19.06 | 4865  |
| 3,4-dichlorobenzyl alcohol<br>      | 34166 | 1.11   | 32567 | -0.96  | 29103 | -4.62  | 30449 | 1.46   | 25858 | 0.36   | 51574 |
| 2-phenyl-1-propanol<br>            | 34280 | 1.17   | 36096 | 0.77   | 34705 | -2.09  | 30914 | 1.59   | 26561 | 0.78   | 43804 |

|                                                                                                                       |       |      |       |      |       |       |       |       |       |       |       |
|-----------------------------------------------------------------------------------------------------------------------|-------|------|-------|------|-------|-------|-------|-------|-------|-------|-------|
| 3-bromobenzyl alcohol<br>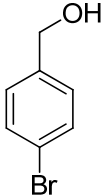            | 35176 | 1.61 | 38320 | 1.85 | 38447 | -0.33 | 35872 | 2.95  | 29275 | 2.53  | 26613 |
| 4-chloro-3-ethyl phenol<br>          | 35386 | 1.7  | 38242 | 1.81 | 40671 | 0.71  | 32063 | 1.9   | 44829 | 12.04 | 16211 |
| 2,5-dichlorobenzyl alcohol<br>       | 35485 | 1.76 | 37492 | 1.46 | 41098 | 0.91  | 32372 | 1.99  | 28177 | 1.82  | 25455 |
| 3,4-dimethylpyrazole-1-methanol<br> | 40098 | 3.9  | 41547 | 3.37 | 43804 | 2.15  | 42659 | 4.8   | 39515 | 8.91  | 32895 |
| trifluoroacetic acid<br>           | 50352 | 8.69 | 54698 | 9.43 | 63823 | 11.57 | 73744 | 13.77 | 34053 | 5.54  | 45263 |

**SI Table 3:** The ranks and scores of the tested molecules are listed to show the effect of modifying the docking scoring parameters on this set of molecules. The ranks are shown using the standard docking parameters (Strd.), adding +0.4 or +0.8 electrons to His102 (+0.4 e<sup>-</sup> or +0.8 e<sup>-</sup>), scaling the van der Waals term by a factor of 0.5 (Scale VdW), scaling the electrostatics term by a factor of 2 (Scale Elec.), and docking to the L99A cavity using the standard parameters. 2-mercaptoethanol, a ligand was ranked in the intermediate range between the true positives (1%) and false negatives (5%) and is not included on this list due to that ambiguity.



## SI Table 4- DOCK Rank List

| Rank | SMILES                                              | ZINC ID   | DOCK Score | Electrostatics | VDW    | Polar Desolv. | Non-Polar Desolv. |
|------|-----------------------------------------------------|-----------|------------|----------------|--------|---------------|-------------------|
| 1    | <chem>c1([nH]nc(n1)[N+](=O)[O-])[N+](=O)[O-]</chem> | C04405530 | -28.47     | -5.11          | -21.46 | 3.6           | -5.5              |
| 2    | <chem>c1(nc(n2(nnc2n1)N)N)N</chem>                  | C16889989 | -23.52     | -9.59          | -16.37 | 7.47          | -5.02             |
| 3    | <chem>c1ccc(c(c1)NC(=O)N=[N+]=[N-])F</chem>         | C16941442 | -22.48     | -1.67          | -24.27 | 3.57          | -0.11             |
| 4    | <chem>c1([nH]nc(n1)Br)[N+](=O)[O-]</chem>           | C15446333 | -22.07     | -3.93          | -17.11 | 2.56          | -3.59             |
| 5    | <chem>c1c(nc([n-]1)[N+](=O)[O-])[N+](=O)[O-]</chem> | C05425252 | -22.05     | -2.11          | -18.34 | 3.4           | -5                |
| 6    | <chem>c1ccc(cc1)CN[N+](=O)[O-]</chem>               | C01668645 | -21.89     | c-0.07         | -22.58 | 4.12          | -3.35             |
| 7    | <chem>c1ccc(cc1)N=C=S</chem>                        | C00164500 | -21.83     | -0.06          | -20.54 | 2.73          | -3.97             |
| 8    | <chem>c1ccc(cc1)COC(=O)Cl</chem>                    | C00388130 | -21.52     | 0.02           | -19.65 | 2.61          | -4.5              |
| 9    | <chem>c1cc(ccc1N=C=O)F</chem>                       | C00164841 | -21.49     | -0.86          | -20.51 | 1.86          | -1.98             |
| 10   | <chem>C=CSc1ccccc1</chem>                           | C01671473 | -21.46     | 0.2            | -19.37 | 2.25          | -4.55             |
| 11   | <chem>c1ccc(cc1)CON=O</chem>                        | C04537786 | -21.41     | -0.37          | -19.87 | 2.83          | -4                |
| 12   | <chem>c1cc(ccc1OC(=O)Cl)F</chem>                    | C00389521 | -21.33     | -0.94          | -20.64 | 2.63          | -2.37             |
| 13   | <chem>c1ccc(cc1)CCS</chem>                          | C04271722 | -21.26     | -1.17          | -16.92 | 1.42          | -4.59             |
| 14   | <chem>c1cc(c(c(c1N=C=O)F)F</chem>                   | C02539239 | -21.2      | -1.74          | -20.05 | 2.55          | -1.96             |
| 15   | <chem>c1cc(c(c(c1F)F)NC(=S)N</chem>                 | C13657238 | -21.2      | -0.77          | -20.53 | 2.54          | -2.44             |
| 16   | <chem>c1c(cc(c(c1F)N=C=O)F)F</chem>                 | C02580782 | -21.12     | 0.19           | -20.78 | 1.96          | -2.49             |
| 17   | <chem>c1cc(c(cc1F)N)Cl</chem>                       | C02575153 | -21.08     | -2.93          | -17.71 | 1.8           | -2.24             |
| 18   | <chem>c1cc(c(cc1F)F)N=C=O</chem>                    | C00164769 | -20.95     | -1.39          | -20.28 | 2.63          | -1.91             |
| 19   | <chem>c1cc(sc1C#N)[N+](=O)[O-]</chem>               | C00076192 | -20.93     | -1.9           | -20.27 | 4.84          | -3.59             |
| 20   | <chem>C/C=C/Cc1ccccc1O</chem>                       | C01868609 | -20.85     | -0.71          | -19.18 | 2.55          | -3.51             |
| 21   | <chem>C/C=N/Cc1ccccc1</chem>                        | C16999032 | -20.85     | -0.19          | -20.4  | 3.04          | -3.31             |
| 22   | <chem>c1ccc(cc1)N=C=O</chem>                        | C01620980 | -20.61     | -0.7           | -19.98 | 2.01          | -1.94             |
| 23   | <chem>c1cc(c(cc1SC#N)F)N</chem>                     | C03886750 | -20.56     | -2.15          | -19.61 | 3.41          | -2.22             |
| 24   | <chem>c1cnccc1N=C=S</chem>                          | C23584266 | -20.54     | -0.99          | -20.38 | 3.34          | -2.51             |
| 25   | <chem>c1ccc(cc1)NC(=S)NN</chem>                     | C16739945 | -20.51     | -0.5           | -22.1  | 4.26          | -2.18             |
| 26   | <chem>c1ccc(cc1)OC(=O)N=C=O</chem>                  | C02384737 | -20.49     | -0.24          | -23.58 | 3.77          | -0.44             |
| 27   | <chem>c1cc(oc1)CN=C=S</chem>                        | C02146625 | -20.44     | -1.99          | -19.3  | 3.26          | -2.42             |
| 28   | <chem>C#Cc1cc(c(cc1N)F)F</chem>                     | C16159017 | -20.44     | -2.93          | -18.71 | 3.95          | -2.74             |
| 29   | <chem>c1(c(non1)/N=N/c2c(non2)N)N</chem>            | C15636578 | -20.3      | -3.41          | -21.46 | 5.04          | -0.47             |
| 30   | <chem>C=Cc1c1ccccc1O</chem>                         | C01576883 | -20.29     | -0.87          | -19.4  | 2.78          | -2.8              |
| 31   | <chem>SCc1ccccc1</chem>                             | M1995A025 | -20.26     | -0.44          | -17.63 | 1.82          | -4.01             |
| 32   | <chem>c1ccc(cc1)CSC#N</chem>                        | C01529490 | -20.25     | -0.88          | -18.35 | 3.55          | -4.57             |
| 33   | <chem>c1ccc(cc1)C/C=N/O</chem>                      | C13520876 | -20.25     | -3.39          | -19.89 | 5.17          | -2.13             |
| 34   | <chem>[H]/N=C(NC#N)/Nc1ccccc1</chem>                | C19300262 | -20.24     | 0.13           | -22.75 | 8.42          | -6.05             |
| 35   | <chem>c1cc(ccc1CS)F</chem>                          | C00404004 | -20.22     | -1.31          | -17.21 | 2.34          | -4.04             |
| 36   | <chem>c1cc(cc(c1)F)N=C=O</chem>                     | C02242675 | -20.21     | -1.51          | -19.33 | 2.53          | -1.9              |
| 37   | <chem>CSc1ccc(cc1)F</chem>                          | C00403157 | -20.2      | 0.01           | -18.24 | 2.24          | -4.22             |
| 38   | <chem>c1c([nH]nc1[N+](=O)[O-])C(F)(F)F</chem>       | C12396555 | -20.2      | -4.68          | -16.7  | 4.15          | -2.97             |
| 39   | <chem>c1cc(cc(c1)F)NC(=S)N</chem>                   | C13658596 | -20.19     | -2.36          | -18.09 | 2.67          | -2.41             |
| 40   | <chem>c1ccc(cc1)C#CC#N</chem>                       | C01696957 | -20.16     | -0.38          | -18.04 | 3.04          | -4.78             |
| 41   | <chem>c1(nnc(s1)N)C(F)(F)F</chem>                   | C17045419 | -20.14     | -4.13          | -16.56 | 1.42          | -0.87             |
| 42   | <chem>c1ccc(cc1)N=[N+]=[N-]</chem>                  | C13950915 | -20.13     | -0.24          | -20.17 | 1.92          | -1.63             |
| 43   | <chem>c1c(ncn1)N[N+](=O)[O-]</chem>                 | C03860187 | -20.11     | -5.92          | -18.6  | 6.66          | -2.26             |
| 44   | <chem>C=C=Cn1c(nnn1)N</chem>                        | C17105011 | -20.11     | -2.34          | -18.92 | 3.61          | -2.46             |
| 45   | <chem>c1c(c(cc(c1F)Br)N</chem>                      | C02526707 | -20.07     | -3.46          | -16.76 | 2.55          | -2.39             |
| 46   | <chem>c1cc(ccc1C(F)(F)F)N=C=O</chem>                | C00164849 | -20.06     | -1.49          | -18.11 | 1.99          | -2.45             |
| 47   | <chem>c1ccc(cc1)CSC#N</chem>                        | C32138416 | -19.97     | -1.02          | -18.75 | 4.38          | -4.59             |
| 48   | <chem>c1ccc(cc1)C(C#N)(F)F</chem>                   | C08698399 | -19.96     | 0.17           | -18.53 | 2.69          | -4.3              |
| 49   | <chem>c1cc(c(c(c1N=C=O)F)F)F</chem>                 | C00152315 | -19.95     | -2.22          | -19.17 | 3.98          | -2.53             |
| 50   | <chem>C#C[C@H](c1ccccc1)O</chem>                    | C01673125 | -19.95     | -0.72          | -20.06 | 3.35          | -2.52             |
| 51   | <chem>c1cc(c(cc1F)F)CN=C=S</chem>                   | C31829483 | -19.94     | -2.11          | -17.27 | 3.24          | -3.8              |
| 52   | <chem>c1cc(ncn1)N[N+](=O)[O-]</chem>                | C06666632 | -19.93     | -0.32          | -21.94 | 4.25          | -1.92             |
| 53   | <chem>COC(=O)C1ccccc1</chem>                        | C02526463 | -19.88     | 0.11           | -20.93 | 5.13          | -4.19             |
| 54   | <chem>c1c(nc([nH]1)Br)[N+](=O)[O-]</chem>           | C05425250 | -19.87     | -1.52          | -18.49 | 3.09          | -2.65             |
| 55   | <chem>c1cc2c(cc1Cl)nn[nH]2</chem>                   | C05425428 | -19.85     | -4.63          | -17.48 | 3.91          | -1.95             |
| 56   | <chem>C#CCn1ncc(n1)[N+](=O)[O-]</chem>              | C01067075 | -19.84     | -2.52          | -20.32 | 6.19          | -3.18             |
| 57   | <chem>c1cc(ncn1)C(=N)C#N</chem>                     | C22995892 | -19.82     | -0.34          | -22.59 | 6.1           | -2.98             |
| 58   | <chem>c1(c(c(nc(c1)F)F)F)F</chem>                   | C02539380 | -19.81     | 0.17           | -18.39 | 0.53          | -2.12             |
| 59   | <chem>c1c(nc(c1Br)N)F</chem>                        | C19616065 | -19.81     | -2.93          | -18.01 | 2.74          | -1.62             |
| 60   | <chem>c1cc2c(cc1C#N)non2</chem>                     | C00161282 | -19.78     | -2.55          | -19.21 | 4.71          | -2.73             |
| 61   | <chem>CCc1ccccc1</chem>                             | M1995A033 | -19.78     | -0.65          | -15.97 | 1.3           | -4.45             |
| 62   | <chem>c1cnccc1N[N+](=O)[O-]</chem>                  | C00330820 | -19.77     | -2.06          | -20.48 | 4.57          | -1.79             |
| 63   | <chem>Cc1ccc(c(n1)N)SC#N</chem>                     | C20413739 | -19.77     | -4.54          | -18.43 | 5.21          | -2.01             |
| 64   | <chem>C=Cc1ccccc1</chem>                            | C02039882 | -19.75     | -1.07          | -18.95 | 3.11          | -2.84             |
| 65   | <chem>c1ccc(cc1)NCN=O</chem>                        | C17300127 | -19.75     | -1.35          | -21.05 | 4.57          | -1.92             |
| 66   | <chem>c1ccc(c(c1)N)Cl</chem>                        | C00164914 | -19.72     | -2.43          | -17.12 | 2.02          | -2.19             |
| 67   | <chem>CCOC(=O)C(=O)Cl</chem>                        | C01639557 | -19.72     | -1.23          | -17.9  | 1.96          | -2.54             |
| 68   | <chem>c1cc(sc1)/C=C/[N+](=O)[O-]</chem>             | C00055258 | -19.7      | -1             | -19.09 | 4.76          | -4.36             |
| 69   | <chem>c1ccc(cc1)CN=C=O</chem>                       | C01708235 | -19.7      | -0.98          | -19.9  | 2.8           | -1.62             |
| 70   | <chem>c1c(ncn1)NN=O/[N+](=O)[O-]</chem>             | C06524458 | -19.7      | -3.64          | -17.74 | 3.8           | -2.12             |
| 71   | <chem>c1ccc(cc1)CCC#N</chem>                        | C01747831 | -19.69     | -1.21          | -18.56 | 4.9           | -4.82             |
| 72   | <chem>c1nnc2n1nc(s2)N</chem>                        | C08617477 | -19.67     | -3.6           | -19.95 | 5.92          | -2.04             |
| 73   | <chem>c1cc(c(cc1F)N)C#N</chem>                      | C16159342 | -19.67     | -2.24          | -18.87 | 3.48          | -2.05             |
| 74   | <chem>c1cc(sc1C#N)Br</chem>                         | C02541509 | -19.64     | -1.02          | -17.62 | 2.5           | -3.5              |
| 75   | <chem>c1c([n-]nc1[N+](=O)[O-])[N+](=O)[O-]</chem>   | C04343199 | -19.64     | -4.43          | -15.26 | 3.45          | -3.4              |
| 76   | <chem>C#Cc1ccccc1N</chem>                           | C02534489 | -19.63     | -1.95          | -18.35 | 3.34          | -2.67             |
| 77   | <chem>c1c(ch(n1)[N+](=O)[O-])Cl</chem>              | C02390477 | -19.55     | -1.84          | -19.21 | 3.84          | -2.33             |
| 78   | <chem>c1([nH]nc([nH+]1)[O-])[N+](=O)[O-]</chem>     | C05030609 | -19.55     | -3.48          | -17.97 | 3.74          | -1.84             |
| 79   | <chem>c1ccc(cc1)CNO</chem>                          | C00389753 | -19.53     | -3.17          | -18.8  | 3.01          | -0.56             |
| 80   | <chem>c1(nc(n1)C(F)(F)F)C(F)(F)F</chem>             | C04803474 | -19.52     | -1.82          | -15.91 | 1.2           | -2.99             |
| 81   | <chem>c1cc(ncc1N=C=O)Cl</chem>                      | C04287788 | -19.51     | -2.24          | -19.56 | 3.09          | -0.8              |
| 82   | <chem>c1cc(nnc1N=C(N)N)Cl</chem>                    | C13608829 | -19.5      | -4.59          | -20.08 | 7.09          | -1.92             |
| 83   | <chem>c1cc(c(cc1F)N)CBr</chem>                      | C16082895 | -19.49     | -2.23          | -17.13 | 2.85          | -2.97             |
| 84   | <chem>C=CC1ccccc1</chem>                            | C01845718 | -19.48     | 0.46           | -19.12 | 2.85          | -3.67             |
| 85   | <chem>c1cc(ccc1O)SC#N</chem>                        | C00334839 | -19.47     | -1.9           | -20.55 | 4.56          | -1.58             |
| 86   | <chem>c1cc(ncn1)C(=N)O/N</chem>                     | C12505213 | -19.47     | -4.2           | -20.85 | 5.1           | 0.49              |



|     |                                     |            |        |       |        |      |        |
|-----|-------------------------------------|------------|--------|-------|--------|------|--------|
| 87  | c1cc(ccc1N=C=O)Cl                   | C01707960  | -19.45 | -1.23 | -19.07 | 1.55 | -0.69  |
| 88  | c1cc(c(cc1F)Cl)N                    | C00152883  | -19.43 | -2.71 | -16.86 | 2.38 | -2.23  |
| 89  | c1cnccc1CCS                         | C04522278  | -19.41 | -1.72 | -17.5  | 2.99 | -3.18  |
| 90  | c1ccc(cc1)[C@@H](C#C(F)(F)F)O       | C15774487  | -19.4  | -0.82 | -19.91 | 4.84 | -3.51  |
| 91  | c1cc(c(cc1F)N=C=O)F                 | C00152295  | -19.39 | 0.26  | -20.17 | 2.56 | -2.04  |
| 92  | c1cc(ccc1Cl)NN=O                    | C06536600  | -19.39 | -1.33 | -21.17 | 4.82 | -1.71  |
| 93  | c1c(sc(n1)N)[N+](=O)[O-]            | C08579229  | -19.37 | -5.69 | -18.72 | 6.58 | -1.55  |
| 94  | c1cc(c(c(c1NC(=S)N)F)F)F            | C13659124  | -19.37 | -1.02 | -18.82 | 3.39 | -2.92  |
| 95  | c1cnn(c1)C(=NH2+)N                  | C04217344  | -19.36 | -3.84 | -17.98 | 4.06 | -1.59  |
| 96  | c1c(nc(nc1F)F)FCl                   | C01845799  | -19.3  | -0.23 | -17.87 | 0.57 | -1.77  |
| 97  | c1cc(c(cc1N)N)Cl                    | C00388158  | -19.29 | -2.84 | -18.46 | 2.58 | -0.57  |
| 98  | c1csccl1C(F)(F)F                    | C15440554  | -19.29 | -1.59 | -16.45 | 2.05 | -3.31  |
| 99  | C1CSP(S1)OCC(F)(F)F                 | C01579432  | -19.28 | 1.53  | -14.85 | 5.14 | -11.11 |
| 100 | CSc1ccccc1                          | C01688763  | -19.28 | 0.2   | -17.64 | 2.32 | -4.16  |
| 101 | Cc1ccccc1                           | M1995A023  | -19.28 | -0.91 | -15.94 | 1.4  | -3.84  |
| 102 | c1(c(non1)N=[N+]=[N-])N             | C12558738  | -19.26 | -2.9  | -19.32 | 2.57 | 0.39   |
| 103 | c1ccc(cc1)OC(=O)Cl                  | C00388419  | -19.25 | -0.42 | -20.18 | 3.15 | -1.8   |
| 104 | c1ccc(cc1)OCCN[NH3+]                | C19168146  | -19.24 | -3.77 | -17.37 | 2.98 | -1.07  |
| 105 | CSc1ccccc1                          | M1995A026  | -19.22 | 0.22  | -17.6  | 2.3  | -4.15  |
| 106 | c1cc(c(cc1Cl)F)F                    | C00164831  | -19.2  | -0.89 | -16.71 | 2.22 | -3.22  |
| 107 | c1ccc(c(c1)N=C=O)F                  | C00164839  | -19.2  | -0.57 | -19.83 | 3.25 | -2.05  |
| 108 | Cc1c(non1)C(=N/O)N                  | C04342611  | -19.2  | -4.63 | -18.88 | 3.19 | 1.11   |
| 109 | c1cc(c(cc1F)N)CCl                   | C16082896  | -19.19 | -2.12 | -17.19 | 2.99 | -2.87  |
| 110 | c1c(cc(cc1F)N)N=C=O                 | C02389320  | -19.16 | -1.16 | -17.34 | 1.32 | -1.99  |
| 111 | [H]/N=C/(Nc1cnoc1)N(C(=NH2+))N      | C26510250  | -19.15 | -2.2  | -23.04 | 7.68 | -1.6   |
| 112 | CSc1nc([nH]n1)N=[N+]=[N-]           | C17024990  | -19.14 | -4.89 | -16.45 | 3.47 | -1.26  |
| 113 | c1(c(cc(nc1F)F)F)F                  | C01845797  | -19.12 | 0.46  | -17.45 | 0.68 | -2.81  |
| 114 | c1cc(c(nc1)N)Br                     | C19015172  | -19.11 | -2.47 | -17.86 | 2.81 | -1.6   |
| 115 | c1nc([nH]n1)N/N=C(C#N)/[N+](=O)[O-] | C05005026  | -19.1  | -0.73 | -19.14 | 5.01 | -4.25  |
| 116 | c1c(nc([nH]1)[N+](=O)[O-])Br        | C26894018  | -19.1  | -1.76 | -17.91 | 4.74 | -4.17  |
| 117 | c1cc(ncc1F)CBr                      | C14985908  | -19.09 | -1.56 | -17.51 | 3.15 | -3.17  |
| 118 | c1c(csc1C#N)Br                      | C14988315  | -19.08 | -1.52 | -17.3  | 3.19 | -3.45  |
| 119 | c1ccc(cc1)SC#N                      | C02037318  | -19.07 | -1.38 | -19.56 | 3.51 | -1.64  |
| 120 | H]/N=C/c1cccc1                      | C01759569  | -19.06 | -2.11 | -17.38 | 2.95 | -2.53  |
| 121 | C#Cc1ccccc1                         | M1995A028  | -19.06 | -0.11 | -17.68 | 2.96 | -4.23  |
| 122 | c1cnccc1N=C=O                       | C12957599  | -19.05 | -1.46 | -19.78 | 2.7  | -0.51  |
| 123 | c1c(c(nc(n1)N)N)C#N                 | C00393991  | -19.04 | -3.2  | -19.65 | 4.64 | -0.83  |
| 124 | CC(=O)Oc1ccc(cc1)F                  | C00403164  | -19.01 | 0.28  | -19.96 | 5.01 | -4.35  |
| 125 | c1c(cc(c(c1F)N)F)F                  | C00406986  | -19    | -1.38 | -17.18 | 1.51 | -1.94  |
| 126 | c1c(cncn1)I                         | C00967270  | -19    | -0.81 | -17.68 | 2.19 | -2.7   |
| 127 | c1c(cncn1)Br                        | C00967317  | -18.99 | -0.85 | -18.17 | 2.36 | -2.32  |
| 128 | c1cc(sc1Cl)Cl                       | C01690277  | -18.99 | -0.82 | -15.34 | 0.67 | -3.49  |
| 129 | c1(nnc(s1)Cl)N                      | C17045344  | -18.98 | -3.66 | -16.31 | 1.44 | -0.45  |
| 130 | c1ccc(c(c1)CCC#N)F                  | C31829539  | -18.98 | -1.39 | -18.23 | 5.5  | -4.86  |
| 131 | c1c(cc(c(c1F)CC#N)F)F               | C04290232  | -18.97 | -0.45 | -19.5  | 4.71 | -3.74  |
| 132 | c1cnc(c1)SCC#N                      | C04244935  | -18.96 | -0.18 | -20.38 | 5.07 | -3.47  |
| 133 | c1ccc(cc1)CC#N                      | C01666748  | -18.95 | -1.1  | -19.06 | 5.44 | -4.23  |
| 134 | CCc1nc(on1)[N+](=O)[O-]             | C27828798  | -18.95 | -0.39 | -17.64 | 1.58 | -2.5   |
| 135 | Cc1ccc(cc1)N                        | C00164438  | -18.94 | -3.81 | -15.44 | 2.69 | -2.38  |
| 136 | c1cc(cnc1)[N+](=O)[O-]              | C02559924  | -18.94 | -3.14 | -18.6  | 5.36 | -2.56  |
| 137 | C=Cn1c(nnn1)N                       | C04642610  | -18.93 | -2.94 | -18.58 | 2.98 | -0.39  |
| 138 | c1c(cnccl1)F                        | C02547814  | -18.92 | -0.33 | -17.67 | 1.54 | -2.46  |
| 139 | c1c(cc(c(c1N)N)F)F                  | C02571496  | -18.92 | -4.74 | -16.83 | 3.08 | -0.43  |
| 140 | c1cnccc1C(=N)C#N/N                  | C16123684  | -18.92 | 0.04  | -21.1  | 5.04 | -2.9   |
| 141 | c1cc(cnc1)C=N/N                     | C00436681  | -18.91 | -3.52 | -19.26 | 4.72 | -0.85  |
| 142 | c1csccl1CCl                         | C16124406  | -18.91 | -0.77 | -16.56 | 1.97 | -3.55  |
| 143 | CSc1ccccc1N                         | C00391221  | -18.9  | -1.68 | -17.23 | 2.61 | -2.6   |
| 144 | c1cc(cnc1)CBr                       | C11535817  | -18.86 | -0.79 | -18.25 | 3.27 | -3.09  |
| 145 | c1cc(ccc1C(=N)N)C#N)Cl              | C001715165 | -18.84 | -0.2  | -18.94 | 2.92 | -2.62  |
| 146 | c1c(cc(c(c1F)F)N)N=C=O              | C19737280  | -18.84 | -1.08 | -18.19 | 2.46 | -2.02  |
| 147 | c1cc(c(cc1F)N)F                     | C00388527  | -18.83 | -2.75 | -16.35 | 2.13 | -1.86  |
| 148 | c1cc2c(cc1C#N)n[nH]n2               | C02524667  | -18.83 | -4.54 | -19.54 | 6.59 | -1.34  |
| 149 | c1cc(nnc1C(=O)Cl)Cl                 | C19045534  | -18.83 | -2.54 | -18.36 | 3.98 | -1.92  |
| 150 | c1cn(cn1)C(=O)Cl                    | C22011804  | -18.83 | -1.57 | -18.4  | 3.57 | -2.43  |
| 151 | CC#Cc1ccccc1                        | M1995A037  | -18.83 | 0.42  | -17.66 | 3.43 | -5.02  |
| 152 | c1cc(cnc1)N=C=O                     | C04244934  | -18.82 | -0.91 | -20.55 | 3.25 | -0.6   |
| 153 | c1ccc(cc1)NNC(=O)C(=O)N             | C01599333  | -18.81 | -7.05 | -17.52 | 5    | 0.75   |
| 154 | Cc1ccccc1N                          | C01706910  | -18.8  | -3.34 | -15.22 | 2.09 | -2.32  |
| 155 | CCOC(=O)C(C(F)F)F)F)F               | C01847426  | -18.79 | -1.36 | -15.02 | 1.66 | -4.08  |
| 156 | c1cc(c(cc1F)F)NC(=O)N               | C00171226  | -18.78 | -1.92 | -21.51 | 5.19 | -0.54  |
| 157 | c1c(nc(nc1F)F)N)Br                  | C03660073  | -18.78 | -4.01 | -16.51 | 2.68 | -0.94  |
| 158 | c1cc(c(cc1F)N)[N+](=O)[O-]          | C04416634  | -18.78 | -2.47 | -17.66 | 3.82 | -2.46  |
| 159 | c1cc(c(nc1)N)I                      | C19735470  | -18.78 | -2.8  | -16.97 | 2.94 | -1.94  |
| 160 | c1cc(cc1C#N)[N+](=O)[O-]            | C00156982  | -18.77 | -2.3  | -20.37 | 6.63 | -2.72  |
| 161 | Cc1ccc([nH]1)SC#N                   | C00334412  | -18.77 | -1.6  | -17.46 | 3.05 | -2.75  |
| 162 | c1ccc(c(c1)CS)F                     | C00405148  | -18.77 | 0.36  | -17.82 | 2.72 | -4.03  |
| 163 | c1c(cc(c(c1N)Cl)F)F                 | C02504703  | -18.75 | -3.09 | -17.37 | 2.14 | -0.42  |
| 164 | c1c2c([nH]c(=S)[nH]2)ncn1           | C08100893  | -18.75 | -6.16 | -18.6  | 7.93 | -1.91  |
| 165 | c1cc(cnc1)CCl                       | C00164815  | -18.72 | -0.72 | -18.47 | 3.46 | -2.99  |
| 166 | c1cc(c(cc1F)N)N                     | C00152599  | -18.71 | -4.32 | -17.3  | 3.28 | -0.37  |
| 167 | c1cnn2cncc2c1                       | C12357125  | -18.71 | -2.6  | -17.43 | 5.74 | -4.42  |
| 168 | c1c(c(c(c1)Cl)F)F                   | C14982366  | -18.71 | -0.67 | -17.71 | 2.18 | -2.51  |
| 169 | c1c(csc1C#N)[N+](=O)[O-]            | C00334382  | -18.7  | -2.87 | -18.81 | 6.47 | -3.48  |
| 170 | c1c(cnccl1)Br                       | C00336455  | -18.7  | -0.33 | -17.37 | 1.54 | -2.54  |
| 171 | CSc1ccccc1                          | C01674080  | -18.7  | -0.01 | -16.19 | 2.35 | -4.85  |
| 172 | c1c(sc(n1)N)Cl                      | C17354929  | -18.7  | -4.35 | -16.02 | 3.01 | -1.34  |
| 173 | c1cc(c(nc1)N)Cl                     | C19737460  | -18.69 | -2.9  | -17.57 | 3.24 | -1.47  |
| 174 | c1cc(ccc1NN)F                       | C00085251  | -18.67 | -2.04 | -18.15 | 3.15 | -1.63  |
| 175 | COc1c(cc(cc1F)F)F                   | C02382169  | -18.66 | 0.17  | -18.3  | 2.22 | -2.75  |
| 176 | c1cncc(c1F)Cl                       | C02540648  | -18.66 | -2.33 | -16.47 | 2.59 | -2.45  |

|     |                                               |           |        |       |        |      |       |
|-----|-----------------------------------------------|-----------|--------|-------|--------|------|-------|
| 177 | c1cc(ncc1Cl)N                                 | C19143849 | -18.66 | -3.34 | -16.8  | 2.92 | -1.44 |
| 178 | c1c(cnc(c1)N)F                                | C19736832 | -18.66 | -3.39 | -15.74 | 2.51 | -2.04 |
| 179 | c1ccc(c(c1)CCl)N                              | C20216992 | -18.66 | -1.68 | -17.22 | 3.07 | -2.82 |
| 180 | COc1nc([nH]n1)N=[N+]=[N-]                     | C17024979 | -18.65 | -4.59 | -19.62 | 3.81 | 1.75  |
| 181 | c1([nH]nc(n1)[N+](=O)[O-])Cl                  | C05567031 | -18.64 | -4.81 | -18.49 | 4.38 | 0.28  |
| 182 | c1cc(cnc1)C(F)F                               | C08294933 | -18.64 | -2.57 | -16.32 | 3.03 | -2.78 |
| 183 | c1cc(oc1)C=[NH2+]NO                           | C16082801 | -18.63 | -5.16 | -18.89 | 4.85 | 0.57  |
| 184 | c1ccc(c(c1)CC#N)F                             | C00406998 | -18.62 | -1.16 | -19.34 | 6.15 | -4.27 |
| 185 | c1cc(ccc1CN=C=O)F                             | C02568124 | -18.62 | -1.67 | -19    | 3.65 | -1.59 |
| 186 | c1ccn(c1)C(=O)O                               | C05521785 | -18.62 | -4.2  | -17.92 | 4.83 | -1.32 |
| 187 | c1cc(c(c(c1)F)CBr)F                           | G2008A003 | -18.61 | 0.51  | -17.43 | 2.79 | -4.49 |
| 188 | c1ccc(c(c1)C=N/O)F                            | C02163529 | -18.6  | -3.24 | -19.58 | 5.93 | -1.7  |
| 189 | Sc1ccccc1                                     | S2001A005 | -18.59 | -0.07 | -16.78 | 1.68 | -3.42 |
| 190 | c1cnccc1CBr                                   | C02387257 | -18.57 | -0.96 | -17.8  | 3.21 | -3.03 |
| 191 | C#Cc1cncnc1                                   | C01387208 | -18.56 | -1.64 | -17.95 | 3.83 | -2.8  |
| 192 | c1cc(sc1Cl)Br                                 | C01840973 | -18.56 | -0.86 | -14.83 | 0.69 | -3.56 |
| 193 | c1([nH]nc(n1)Br)Br                            | C04829562 | -18.56 | -3.61 | -16.1  | 3.05 | -1.91 |
| 194 | c1c(ncc(n1)Br)NN=O                            | C06524494 | -18.56 | -2.86 | -19.69 | 4.41 | -0.44 |
| 195 | c1nc(c2c(n1)[nH]n2)N                          | C03652180 | -18.55 | -4.59 | -19.23 | 5.02 | 0.25  |
| 196 | c1cc(oc1C#N)Br                                | C00097639 | -18.54 | -1.33 | -17.71 | 3.28 | -2.78 |
| 197 | c1(c(non1)[N+](=O)[O-])N                      | C04087601 | -18.54 | -3.36 | -17.34 | 3.4  | -1.23 |
| 198 | c1([nH+]c(=O)ss1)N                            | C08737721 | -18.54 | -2.64 | -17.16 | 1.93 | -0.67 |
| 199 | Nc1ccc(F)cc1F                                 | W2002A004 | -18.54 | -2.6  | -16.72 | 2.67 | -1.9  |
| 200 | c1(=N([N+](=O)[O-])[nH]c(n1)[N-][N+](=O)[O-]) | C13634238 | -18.53 | -1.4  | -20.09 | 7.45 | -4.48 |
| 201 | c1c(cncn1)C                                   | C30677788 | -18.53 | -1.4  | -18.29 | 4.03 | -2.87 |
| 202 | lc1ccccc1                                     | M1995A009 | -18.53 | -0.11 | -15.62 | 1.41 | -4.21 |
| 203 | c1([nH]nnn1)c2n([nH]nn2)                      | C04257961 | -18.52 | -9.71 | -17.31 | 6.84 | 1.65  |
| 204 | c1c(c(cc(c1F)F)[N+](=O)[O-])N                 | C04329304 | -18.51 | -2.97 | -17.06 | 4    | -2.49 |
| 205 | c1cc(c(cc1F)F)N                               | C00157573 | -18.5  | -2.46 | -16.81 | 2.68 | -1.9  |
| 206 | CCc1ccccc1N                                   | C01690957 | -18.5  | -1.65 | -15.82 | 1.87 | -2.91 |
| 207 | c1cc(oc1C=O)[N+](=O)[O-]                      | C00152275 | -18.48 | -4.41 | -17.31 | 5.41 | -2.17 |
| 208 | c1c(c(c(c(c1F)F)Br)N                          | C15443794 | -18.48 | -3.82 | -15.81 | 3.57 | -2.41 |
| 209 | c1cnc(cn1)C(=N/O)N                            | C04270085 | -18.47 | -5.18 | -20.6  | 5.49 | 1.81  |
| 210 | c1cc(ccc1N=C(N)N)F                            | C05342293 | -18.47 | 0.44  | -21.35 | 4.83 | -2.38 |
| 211 | C/C=Nc1ccccc1                                 | C17300129 | -18.47 | -0.55 | -17.92 | 3.6  | -3.6  |
| 212 | c1cc(sc1)CN=C=O                               | C19730697 | -18.47 | -1.94 | -18.76 | 3.15 | -0.93 |
| 213 | C=Cc1ccc(cc1)O                                | C00895826 | -18.45 | -0.92 | -18.44 | 2.89 | -1.99 |
| 214 | C=Nc1ccccc1                                   | C01682670 | -18.45 | -0.8  | -18.49 | 3.81 | -2.96 |
| 215 | c1cc(sc1)CCl                                  | C01845722 | -18.45 | -1.23 | -15.73 | 2.16 | -3.65 |
| 216 | c1cc(ccc1N)F                                  | C00013613 | -18.44 | -2.64 | -16.67 | 2.69 | -1.82 |
| 217 | c1c(c(nc(n1)N)N)[N+](=O)[O-]                  | C04531688 | -18.44 | -3.19 | -18.58 | 4.53 | -1.2  |
| 218 | Cc1ccc(cn1)N=C=O                              | C04716476 | -18.44 | -0.56 | -20.07 | 3.22 | -1.02 |
| 219 | c1csc1C(=N/O)N                                | C04218335 | -18.42 | -4.68 | -18.7  | 5.07 | -0.1  |
| 220 | CSc1ccc(cc1)N                                 | C04244883 | -18.42 | -0.4  | -18.36 | 2.87 | -2.54 |
| 221 | c1cc(c(cc1N)N)Br                              | C01715490 | -18.41 | -3.24 | -17.04 | 2.55 | -0.68 |
| 222 | C=COc1c(C(C(F)F)F)F                           | C16125511 | -18.41 | 0.6   | -16.7  | 1.67 | -3.98 |
| 223 | Cc1cc(n[nH]1)C(F)F                            | C08700987 | -18.4  | -3.4  | -16.72 | 4.11 | -2.4  |
| 224 | C=Cc1ccccc1                                   | C00968269 | -18.39 | -0.57 | -15.35 | 1.7  | -4.19 |
| 225 | c1c(cc(c(c1F)NN)F)F                           | C02384130 | -18.39 | -0.74 | -18.31 | 2.29 | -1.63 |
| 226 | c1csc2c1sc(n2)S                               | C15945277 | -18.39 | -1.79 | -18.6  | 4.45 | -2.45 |
| 227 | C=Cc1ccccc1                                   | M1995A032 | -18.39 | -0.58 | -15.33 | 1.71 | -4.18 |
| 228 | c1ccc(cc1)Oc2ccoc2                            | C16125361 | -18.38 | 0.38  | -19    | 4.28 | -4.05 |
| 229 | c1ccc2c(c1)[nH]c(n2)C#N                       | C00374942 | -18.37 | -3.07 | -17.93 | 5.42 | -2.79 |
| 230 | c1cc(ccc1CC#N)F                               | C00388043 | -18.37 | -1.68 | -19.28 | 6.89 | -4.3  |
| 231 | c1cc(cc(c1)F)C=C/[N+](=O)[O-]                 | C00103600 | -18.36 | -0.3  | -18.45 | 5.43 | -5.05 |
| 232 | c1ccc(cc1)NN                                  | C00388099 | -18.36 | -1.8  | -17.48 | 2.56 | -1.63 |
| 233 | c1cc(ncc1Br)N                                 | C19143844 | -18.35 | -3.13 | -16.59 | 2.89 | -1.52 |
| 234 | Cc1ccc(cc1F)N=C=O                             | C02384731 | -18.33 | -0.52 | -18.29 | 2.05 | -1.56 |
| 235 | c1ccc(cc1)C[NH+]=[N+]=[N-]                    | C04293814 | -18.33 | -0.35 | -19.87 | 2.22 | -0.33 |
| 236 | c1c(cnc(n1)N)Cl                               | C01402616 | -18.32 | -1.67 | -17.78 | 2.99 | -1.86 |
| 237 | C(=Nc1c(c(c(c1F)F)F)F)=O                      | C01995285 | -18.32 | -0.4  | -15.48 | 1.12 | -3.56 |
| 238 | c1cc(cnc1)Cl                                  | C02379647 | -18.31 | -0.78 | -17.11 | 3.03 | -3.46 |
| 239 | c1cc(ccc1S)[S-]                               | C19683015 | -18.31 | -1.22 | -15.01 | 1.47 | -3.55 |
| 240 | C=CCOc1ccccc1                                 | C01680380 | -18.3  | -1.48 | -15.3  | 2.51 | -4.03 |
| 241 | c1cc(sc1C(F)F)Cl                              | C15442288 | -18.3  | -1.24 | -14.25 | 1.09 | -3.89 |
| 242 | c1cc(c(cc1F)F)NN                              | C00153133 | -18.29 | -0.75 | -18.54 | 2.71 | -1.7  |
| 243 | c1cnccc1CCl                                   | C00164896 | -18.29 | -0.87 | -17.89 | 3.4  | -2.93 |
| 244 | c1c(c[nH]1)I                                  | C02046962 | -18.29 | -3.73 | -16.05 | 3.09 | -1.6  |
| 245 | Cc1([nH]nc(n1)N=[N+]=[N-])                    | C08383096 | -18.29 | -3.12 | -17.02 | 2.97 | -1.13 |
| 246 | c1c(sc(n1)Cl)C#N                              | C01399115 | -18.28 | -1.04 | -17.84 | 2.76 | -2.17 |
| 247 | c1c([nH+]cc2c1[nH]n2)                         | C05117686 | -18.28 | -4.63 | -18.18 | 4.6  | -0.06 |
| 248 | c1csc1C=N/O                                   | C00157006 | -18.26 | -3.28 | -17.78 | 3.64 | -0.83 |
| 249 | CCc1ccsc1                                     | C01995154 | -18.26 | -1.12 | -14.85 | 1.33 | -3.62 |
| 250 | c1(=S)[nH]nc(n1)NN                            | C12958520 | -18.24 | -8.61 | -16.1  | 7.45 | -0.98 |
| 251 | c1nc([nH]n1)/N=C(N)[O-]                       | C17328384 | -18.24 | -7.78 | -17.4  | 7.27 | -0.33 |
| 252 | c1ccc2c(c1)non2                               | C00161248 | -18.23 | -2.35 | -18.57 | 5.1  | -2.41 |
| 253 | c1cc(cnc1)CN=C=O                              | C19730700 | -18.23 | -1.57 | -20.67 | 4.38 | -0.36 |
| 254 | C#Cc1ccc(cc1)N                                | C02534484 | -18.22 | -0.34 | -18.76 | 3.48 | -2.61 |
| 255 | c1c(cnc(c1F)F)Br                              | C08698196 | -18.22 | -0.94 | -17.06 | 2.29 | -2.5  |
| 256 | c1cnccc1Cl                                    | C12958666 | -18.22 | -0.92 | -16.86 | 2.97 | -3.4  |
| 257 | c1cc(ncc1[N+](=O)[O-])C#N                     | C14982543 | -18.22 | -2.59 | -18.48 | 5.67 | -2.82 |
| 258 | C=Cc1ccsc1                                    | C14983700 | -18.22 | -1.26 | -15.23 | 1.69 | -3.42 |
| 259 | c1cc(c(cc1N)N)N                               | C00053658 | -18.21 | -4.63 | -17.9  | 2.99 | 1.32  |
| 260 | c1cc(oc1[N+](=O)[O-])Br                       | C01664806 | -18.21 | -2.14 | -17.81 | 4.61 | -2.88 |
| 261 | c1([nH]nc(n1)Cl)Cl                            | C03882577 | -18.21 | -3.72 | -15.39 | 2.76 | -1.87 |
| 262 | c1csc1N=C=O                                   | C00158759 | -18.2  | -0.52 | -18.58 | 2.1  | -1.19 |
| 263 | c1nc(c2c(n1)non2)N                            | C02272409 | -18.2  | -3.08 | -19.59 | 5.54 | -1.07 |
| 264 | c1ccc(c(c1)N)N                                | C00004316 | -18.19 | -3.9  | -16.46 | 2.51 | -0.34 |
| 265 | c1(nc(=S)ss1)N                                | C04710251 | -18.19 | -4.66 | -14.21 | 3    | -2.32 |
| 266 | c1ccc(c(c1)N)NC#N                             | C19873054 | -18.19 | -1.35 | -19.72 | 6.53 | -3.65 |

|     |                                     |           |        |       |        |      |       |
|-----|-------------------------------------|-----------|--------|-------|--------|------|-------|
| 267 | c1c(cc(cc1F)F)N                     | C00164838 | -18.18 | -3.79 | -15.03 | 2.46 | -1.82 |
| 268 | c1c(c(ncn1)N)C(=N)O/N               | C04363312 | -18.18 | -6.11 | -20.58 | 5.14 | 3.37  |
| 269 | c1cc(c(cc1O)N)Cl                    | C00404165 | -18.17 | -2.91 | -18.19 | 2.91 | 0.01  |
| 270 | Cc1cc(ccc1N)F                       | C00406935 | -18.17 | -3.48 | -15.16 | 2.84 | -2.37 |
| 271 | c1c(c(c(c(n1)F)F)C(F)F)F            | C02513198 | -18.16 | -0.22 | -17.22 | 2.59 | -3.31 |
| 272 | c1c(c(nc(n1)Cl)N)[N+](=O)[O-]       | C04243102 | -18.16 | -3.86 | -15.62 | 2.83 | -1.51 |
| 273 | c1cn(cn1)C#N                        | C08101017 | -18.16 | -2.23 | -14.49 | 3.7  | -5.13 |
| 274 | c1cncc(c1Br)N                       | C14628887 | -18.16 | -3.78 | -16.23 | 2.72 | -0.87 |
| 275 | c1ccc(cc1)/C=N/N                    | C01664869 | -18.15 | -2.98 | -16.03 | 3.04 | -2.19 |
| 276 | c1ccc(c(c1)CN=C=O)F                 | C02389317 | -18.15 | 0.24  | -20.52 | 3.72 | -1.58 |
| 277 | c1cc(c(c(c1)F)CN=C=O)F              | C15442300 | -18.15 | -0.26 | -19.81 | 3.58 | -1.65 |
| 278 | c1cc(ccc1CC#N)N                     | C00152526 | -18.14 | -1.96 | -19.59 | 6.03 | -2.62 |
| 279 | c1cc(ncc1Br)C#N                     | C00330869 | -18.14 | -1.62 | -17.9  | 4.18 | -2.79 |
| 280 | c1cc(ncc1Cl)C#N                     | C02510866 | -18.14 | -1.3  | -18.41 | 4.29 | -2.71 |
| 281 | C#C[C@H](c1cccc1)N                  | C32501211 | -18.14 | -0.44 | -18.45 | 3.37 | -2.62 |
| 282 | Nc1cc(F)cc(F)c1                     | W2002A007 | -18.13 | -3.76 | -15.03 | 2.47 | -1.82 |
| 283 | c1cc2c(n[nH]c2nc1)N                 | C00168464 | -18.12 | -5.9  | -18.25 | 7.07 | -1.05 |
| 284 | c1cc(ccc1N)Cl                       | C00403225 | -18.12 | -0.77 | -17.38 | 2.16 | -2.13 |
| 285 | c1cc(sc1)C(=[NH2+])NO               | C13140013 | -18.12 | -5    | -17.48 | 4.5  | -0.14 |
| 286 | c1c(c(cc(c1F)F)F)N                  | C00409371 | -18.11 | -3.14 | -15.81 | 2.72 | -1.88 |
| 287 | CCc1cccnc1                          | C02034880 | -18.11 | -0.92 | -16.89 | 2.77 | -3.08 |
| 288 | c1c[nH]c2c1cc(cn2)F                 | C14400996 | -18.11 | -2.83 | -17.03 | 4.77 | -2.95 |
| 289 | c1c(cnc(c1Cl)F)F                    | C14982363 | -18.11 | -0.85 | -17.16 | 2.3  | -2.41 |
| 290 | c1cc2c(c[nH]2)c(c1)F                | C14983432 | -18.11 | -2.5  | -17.69 | 4.39 | -2.31 |
| 291 | c1c(cnc(n1)N)CCl                    | C14989440 | -18.11 | -1.96 | -18.3  | 4.62 | -2.46 |
| 292 | c1c(cncn1)C(F)F                     | C30714846 | -18.11 | -1.44 | -16.68 | 2.61 | -2.59 |
| 293 | c1ccc(cc1)OC(=O)O                   | C05555526 | -18.1  | -1.43 | -19.91 | 5.79 | -2.55 |
| 294 | C=Cn1ccnc1                          | C08294952 | -18.1  | -2.66 | -16.9  | 4.77 | -3.32 |
| 295 | c1cc(cc(c1F)N                       | C00157619 | -18.09 | -3.23 | -15.72 | 2.65 | -1.79 |
| 296 | CCc1cccs1                           | C02005192 | -18.09 | -1.28 | -14.59 | 1.52 | -3.74 |
| 297 | c1ccc2c(c1)[nH]nn2                  | C00332008 | -18.08 | -3.96 | -17.86 | 5.12 | -1.39 |
| 298 | c1c(cc(c1N)F)F                      | C02575075 | -18.08 | -2.92 | -15.87 | 2.6  | -1.88 |
| 299 | c1cc(c(cc1F)F)CO                    | C00409278 | -18.07 | -1.61 | -17.53 | 2.55 | -1.47 |
| 300 | c1c(c(nc(n1)F)F)Cl                  | C02540176 | -18.06 | -1.31 | -17.68 | 2.71 | -1.79 |
| 301 | c1ccc(cc1)N                         | C17886255 | -18.06 | -1.76 | -16.4  | 1.9  | -1.81 |
| 302 | Nc1ccccc1                           | Eliq_2GUN | -18.06 | -1.89 | -16.28 | 1.91 | -1.8  |
| 303 | c1cc(cnc1)Br                        | C00158591 | -18.04 | -0.34 | -17.73 | 2.52 | -2.49 |
| 304 | c1ccc(cc1)C[N+](=O)[O-]             | C01666770 | -18.03 | -0.92 | -17.24 | 4.23 | -4.1  |
| 305 | c1cnccc1NN=O                        | C05464485 | -18.03 | -3.09 | -17.96 | 3.57 | -0.56 |
| 306 | c1cc(ncc1Br)NN=O                    | C13213087 | -18.03 | -2.97 | -19.01 | 5.71 | -1.77 |
| 307 | c1ccc(cc1)/C=C/C=O                  | C13523661 | -18.02 | -1.5  | -17.42 | 4.87 | -3.97 |
| 308 | CCc1c(cncn1)F                       | C16158265 | -18.02 | -0.62 | -16.99 | 2.52 | -2.93 |
| 309 | CC(=O)Nc1[nH+]cnc2n1nnc2            | C20674155 | -18.02 | -6.83 | -16.62 | 10.6 | -5.16 |
| 310 | c1cc(ccc1N)N                        | C08294962 | -18.01 | -2.8  | -17.44 | 2.34 | -0.1  |
| 311 | c1c[nH]cc(c1=O)[N+](=O)[O-]         | C08581558 | -18.01 | -5.09 | -18.36 | 6.5  | -1.06 |
| 312 | c1c(c[nH]n1)[N+](=O)[O-]            | C03852475 | -18    | -4.2  | -17.48 | 4.95 | -1.27 |
| 313 | c1cc(cnc1)C(F)Cl                    | C03887768 | -18    | 0.24  | -18.06 | 2.89 | -3.07 |
| 314 | c1cncc(c1)CBr                       | C02387255 | -17.99 | -0.79 | -17.45 | 3.38 | -3.13 |
| 315 | c1cc(sc1)CS                         | C00153137 | -17.98 | -1.38 | -15.33 | 2.03 | -3.3  |
| 316 | c1ccc(cc1)NC#N                      | C01586445 | -17.98 | -3.12 | -14.07 | 4.13 | -4.91 |
| 317 | c1c(c(nc(n1)Cl)N)C#N                | C02169278 | -17.98 | -3.91 | -16.71 | 3.81 | -1.18 |
| 318 | c1c(c(c(=O)[nH]n1)[O-])[N+](=O)[O-] | C09646749 | -17.98 | -3.46 | -20.18 | 5.37 | 0.29  |
| 319 | c1c(cnc(n1)N)Br                     | C00967319 | -17.97 | -1.84 | -17.12 | 2.96 | -1.96 |
| 320 | Cc1ccc(cn1)C=C                      | C02040980 | -17.97 | -0.44 | -17.37 | 3.26 | -3.42 |
| 321 | c1(c(non1)[n+][n-]c3c(n2)non3)N     | C04017756 | -17.97 | -2.63 | -18    | 3.79 | -1.13 |
| 322 | CCc1ccc(cc1)N                       | C12359032 | -17.97 | -1.52 | -15.45 | 1.83 | -2.83 |
| 323 | c1c(c(c(c(n1)F)F)F)F                | C14983574 | -17.97 | -1.22 | -16.96 | 2.37 | -2.17 |
| 324 | c1(nc2n(n1)C(=O)C(=O)N2)N           | C17005549 | -17.97 | -1.69 | -22.03 | 6.89 | -1.15 |
| 325 | c1c(cnc(c1[N+](=O)[O-])N)F          | C19616072 | -17.97 | -2.43 | -18.08 | 4.13 | -1.6  |
| 326 | c1csc2c1scc2                        | C00165492 | -17.96 | -1.76 | -15.71 | 3.19 | -3.68 |
| 327 | c1cscc1[N+](=O)[O-]                 | C00967491 | -17.96 | -2.18 | -18    | 5.28 | -3.05 |
| 328 | c1cncc(c1F)Br                       | C02598963 | -17.96 | -2.35 | -15.67 | 2.62 | -2.57 |
| 329 | Cc1ccc(cc1)N                        | C04774057 | -17.96 | -2.5  | -15.3  | 2.01 | -2.18 |
| 330 | CCc1ccccc1                          | M1995A040 | -17.96 | -0.62 | -13.49 | 1.22 | -5.07 |
| 331 | c1cc2c(cc1Cl)non2                   | C00161280 | -17.95 | -2.58 | -17.19 | 2.94 | -1.13 |
| 332 | CCNC(=O)n1c(nnn1)N                  | C05456655 | -17.95 | -4.35 | -18.65 | 4.25 | 0.8   |
| 333 | c1cc(c(c(c1)F)Br)N                  | C12648832 | -17.95 | -2.58 | -16.3  | 3.24 | -2.33 |
| 334 | C(=O)(C(F)F)Br                      | C04241560 | -17.94 | -0.22 | -15.9  | 0.37 | -2.19 |
| 335 | c1nc(c(c(n1)F)Br)F                  | C14628950 | -17.94 | -1.86 | -16.11 | 2.28 | -2.26 |
| 336 | c1(nnc(s1)N)N                       | C17002872 | -17.94 | -4.74 | -16.33 | 2.65 | 0.48  |
| 337 | c1ccc2c(c1)c[nH]n2                  | C16052862 | -17.93 | -2.04 | -17.82 | 4.22 | -2.29 |
| 338 | c1cnccc1CN=C=O                      | C19730703 | -17.93 | -1.43 | -20.69 | 4.45 | -0.25 |
| 339 | c1cc(c(c(c1)F)N=C=O)F               | C00152291 | -17.92 | 0.24  | -20.16 | 4.11 | -2.1  |
| 340 | c1cc(c(cc1)F)F                      | C00164594 | -17.92 | -0.89 | -14.71 | 2    | -4.32 |
| 341 | c1nc(nc(n1)N)N                      | C01445475 | -17.92 | -4.11 | -16.56 | 4.77 | -2.03 |
| 342 | c1cncc(c1F)[N+](=O)[O-]             | C02599078 | -17.92 | -3.18 | -18.34 | 6.18 | -2.57 |
| 343 | c1c(c(c(c1F)F)N)[N+](=O)[O-]        | C04269492 | -17.92 | -2.48 | -15.26 | 2.39 | -2.56 |
| 344 | c1cncc(c1)N=C=O                     | C16677983 | -17.92 | -1.29 | -18.79 | 3.65 | -1.49 |
| 345 | c1c(sc(n1)Cl)[N+](=O)[O-]           | C32500065 | -17.92 | -2.1  | -16    | 2.6  | -2.41 |
| 346 | c1cncc(c1Cl)N                       | C00331594 | -17.91 | -3.35 | -16.56 | 2.76 | -0.75 |
| 347 | c1cc(cc(c1)F)CSC#N                  | C32138415 | -17.91 | -1.71 | -16.11 | 4.5  | -4.59 |
| 348 | c1ccc(cc1)NC2=CC(=O)OC2             | C00133694 | -17.9  | -1.32 | -19.63 | 6.86 | -3.81 |
| 349 | c1ccc(c(c1)N)F                      | C00157599 | -17.9  | -2.06 | -16.52 | 2.55 | -1.87 |
| 350 | c1cc(ncc1Cl)Cl                      | C00406964 | -17.9  | -1.38 | -16.03 | 2.33 | -2.81 |
| 351 | c1c(cnc(c1F)N)F                     | C02510831 | -17.9  | -1.59 | -17.34 | 2.27 | -1.23 |
| 352 | c1cc(cnc1)CNC(=S)N                  | C13545439 | -17.9  | 0.26  | -23.08 | 5.54 | -0.62 |
| 353 | c1ccc(c(c1)CC#N)N                   | C00389700 | -17.89 | -2.25 | -18.53 | 5.63 | -2.74 |
| 354 | c1cc(oc1C#N)I                       | C28405036 | -17.89 | -1.59 | -16.26 | 3.1  | -3.13 |
| 355 | c1c(cnc(c1F)C(F)F)F                 | C30714866 | -17.89 | -1.31 | -15.64 | 1.88 | -2.82 |
| 356 | c1cc(sc1)Cl                         | C01648214 | -17.88 | -1.52 | -14.92 | 1.55 | -2.98 |

|     |                                    |           |        |       |        |      |       |
|-----|------------------------------------|-----------|--------|-------|--------|------|-------|
| 357 | c1(c(c(nc(c1Cl)F)F)F)N             | C02167052 | -17.88 | -4.08 | -15.49 | 2.5  | -0.81 |
| 358 | c1cc(cnc1)N=C=S                    | C03132538 | -17.88 | -0.13 | -18.69 | 3.51 | -2.57 |
| 359 | c1c(nc(s1)N)CCl                    | C04633527 | -17.88 | -2.36 | -17.46 | 3.88 | -1.93 |
| 360 | c1ccc(cc1)/N=C/N                   | C15767277 | -17.88 | 0.04  | -20.02 | 4.66 | -2.56 |
| 361 | c1cc(ccc1C#N)C(F)F                 | C00164419 | -17.87 | -1.07 | -16.93 | 3.74 | -3.61 |
| 362 | C(#N)c1c(non1)/C(=N/O)/N           | C04342682 | -17.87 | -4.77 | -16.39 | 3.32 | -0.03 |
| 363 | CCc1ccnc1                          | C08294961 | -17.87 | -1.34 | -16.24 | 2.74 | -3.03 |
| 364 | c1cc(ccc1C#N)F                     | C00164613 | -17.86 | 0.16  | -17.9  | 3.51 | -3.64 |
| 365 | C#CCOc1ccccc1                      | C02169051 | -17.86 | -2.21 | -17.54 | 3.77 | -1.88 |
| 366 | c1cc(cnc1)CNC(=O)C(=O)N            | C04116536 | -17.86 | -2.73 | -24.94 | 6.27 | 3.55  |
| 367 | c1(nc(nn1C(=O)N)[N+](=O)[O-])N     | C05071980 | -17.86 | -7.16 | -17.39 | 4.81 | 1.88  |
| 368 | COC(=O)Nc1ccc(cc1F)F               | C06126169 | -17.86 | -0.61 | -18.55 | 3.57 | -2.26 |
| 369 | c1cncn2c1nnc2                      | C01573373 | -17.85 | -3.17 | -19.61 | 9.07 | -4.15 |
| 370 | c1cc(ccc1OC(F)F)F                  | C01847536 | -17.85 | 0.22  | -16.9  | 1.56 | -2.72 |
| 371 | c1ccn2c(c1)nnc2N                   | C08616242 | -17.85 | -3.76 | -16.22 | 6.12 | -3.99 |
| 372 | c1cc(ccc1C=C/C(=O)Cl)F             | C02574175 | -17.84 | -1.78 | -18.18 | 3.94 | -1.82 |
| 373 | c1ncn(n1)C(=[NH2+])N               | C06585615 | -17.84 | -5.21 | -17.35 | 4.03 | 0.68  |
| 374 | c1c(c(nc(c1F)N)F)N                 | C22006783 | -17.84 | -3.49 | -17.04 | 3.79 | -1.09 |
| 375 | c1c(nc(c1)Br)C#N                   | C30678099 | -17.84 | -1.75 | -18.32 | 3.68 | -1.45 |
| 376 | Nc1ccccc1F                         | W2002A003 | -17.84 | -2.25 | -16.28 | 2.55 | -1.86 |
| 377 | c1c(nc[nH]1)I                      | C04244878 | -17.83 | -4.64 | -15.99 | 5.22 | -2.43 |
| 378 | c1ccc(cc1)Oc2[nH]nnn2              | C19910546 | -17.83 | -0.26 | -22.71 | 5.64 | -0.49 |
| 379 | c1c(cc(cc1F)F)F                    | C00164868 | -17.82 | 0     | -15.33 | 0.98 | -3.47 |
| 380 | C=CCc1ccc(cc1O)F                   | C01562056 | -17.82 | -0.77 | -19.34 | 3.16 | -0.87 |
| 381 | c1ccn(c1)CCl                       | C08294964 | -17.82 | -0.88 | -17.51 | 3.6  | -3.03 |
| 382 | c1cc(c(cc1Cl)N)F                   | C00164833 | -17.81 | -1.47 | -15.91 | 1.8  | -2.24 |
| 383 | c1cncnc1N[+](=O)[O-]               | C01703180 | -17.81 | -3.06 | -20.6  | 5.53 | 0.32  |
| 384 | c1c(cc(c1N)Br)F                    | C01704162 | -17.81 | -3.08 | -16.84 | 2.09 | 0.02  |
| 385 | c1ccc(cc1)/C=C/C(=O)Cl             | C01680031 | -17.8  | -1.45 | -18.56 | 3.48 | -1.27 |
| 386 | Cc1ccc(cc1)C#N                     | C01696575 | -17.8  | 0.08  | -17.38 | 3.63 | -4.14 |
| 387 | CSc1cccs1                          | C00160928 | -17.79 | 0.18  | -16.61 | 2.1  | -3.46 |
| 388 | c1ccn(c1)CCS                       | C04522277 | -17.79 | -0.32 | -16.83 | 2.74 | -3.38 |
| 389 | Cc1ccc(cc1N)N                      | C00388039 | -17.78 | -3.78 | -15.93 | 2.64 | -0.71 |
| 390 | c1c([nH]nc1C(F)F)C(F)F             | C01023256 | -17.78 | -3.41 | -14.31 | 2.45 | -2.52 |
| 391 | c1cc(c(cc1NN)F)F                   | C02243112 | -17.78 | -2.54 | -17.59 | 4.02 | -1.67 |
| 392 | c1ccn(c1)CCC#N                     | C01718831 | -17.77 | -1.64 | -17.76 | 5.76 | -4.14 |
| 393 | c1cscc1Cl                          | C02168778 | -17.76 | -1.17 | -15.23 | 1.54 | -2.9  |
| 394 | CCCN/C(=N/[N+](=O)[O-])/N          | C25623935 | -17.76 | -5.36 | -14.1  | 3.47 | -1.77 |
| 395 | c1cnc(c1N)Br                       | C19015182 | -17.75 | -2.46 | -17.31 | 2.97 | -0.96 |
| 396 | c1cc(ccc1F)F                       | C00164664 | -17.74 | -0.31 | -15.66 | 1.68 | -3.45 |
| 397 | c1cc(c(c1Cl)N)F                    | C02389922 | -17.74 | -2.16 | -15.34 | 2.03 | -2.27 |
| 398 | COC(=O)CC=C=C                      | C15809774 | -17.74 | 0.23  | -18.49 | 4.29 | -3.78 |
| 399 | c1cc(cnc1)Cl                       | C00404335 | -17.73 | -0.5  | -17.43 | 2.59 | -2.39 |
| 400 | c1(nc([nH]n1)N)C(F)F               | C17173217 | -17.73 | -5.42 | -16.03 | 5.44 | -1.73 |
| 401 | c1ccc(c1)C#N                       | C00157544 | -17.72 | -1.76 | -17.95 | 3.98 | -2    |
| 402 | C#Cc1ccccc1                        | C02577202 | -17.72 | -0.58 | -18.11 | 3.9  | -2.94 |
| 403 | c1nc([nH]1)I                       | C05204774 | -17.72 | -2.57 | -16.3  | 3.25 | -2.1  |
| 404 | c1cc(ccc1NN)Cl                     | C00088600 | -17.71 | -1.97 | -16.58 | 2.69 | -1.85 |
| 405 | c1ccc(cc1)/C=C/C#N                 | C01675000 | -17.71 | -0.66 | -19.21 | 4.49 | -2.33 |
| 406 | c1cc(sc1)[N+](=O)[O-]              | G2008A002 | -17.71 | -2.71 | -17.89 | 6.13 | -3.24 |
| 407 | c1cc(cnc1)I                        | C00331802 | -17.7  | -0.51 | -16.75 | 2.39 | -2.82 |
| 408 | c1cc(c(c1[N+](=O)[O-])F)F          | C04255263 | -17.7  | -2.14 | -16.76 | 3.71 | -2.52 |
| 409 | c1cc(nc(c1Cl)N)N                   | C19911452 | -17.7  | -3.25 | -18.56 | 4.61 | -0.5  |
| 410 | C=CCc1ccccc1N                      | C00047330 | -17.69 | -1.43 | -19.09 | 2.65 | 0.18  |
| 411 | c1(nnn1C(=O)N)N                    | C05670121 | -17.69 | -5.19 | -18.88 | 4.67 | 1.71  |
| 412 | c1cc(cnc1)NN=O                     | C13212918 | -17.69 | -2.64 | -19.77 | 5.42 | -0.69 |
| 413 | c1cc2cc[nH]c2nc1                   | C15442276 | -17.69 | -2.43 | -17.61 | 5.29 | -2.94 |
| 414 | c1ccn(c1)CS                        | C04775643 | -17.68 | -1.27 | -17.24 | 3.52 | -2.69 |
| 415 | C=CCOc1ccc(cc1)N                   | C00047331 | -17.67 | -0.24 | -18.69 | 3.28 | -2.02 |
| 416 | c1cc(sc1)S                         | C02169156 | -17.67 | -1.47 | -15.03 | 1.55 | -2.71 |
| 417 | c1c(c(nc(n1)N)N)CBr                | C13283449 | -17.67 | -3.41 | -17.41 | 4.81 | -1.65 |
| 418 | c1cc(c(cc1F)N)Br                   | C00403473 | -17.66 | -2.92 | -17.04 | 1.77 | 0.52  |
| 419 | c1c(nc(c1)Cl)C#N                   | C30678538 | -17.66 | -1.75 | -18.31 | 3.81 | -1.4  |
| 420 | c1([nH]nc1n1)NN=O                  | C05567030 | -17.65 | -3.51 | -22.66 | 5.36 | 3.16  |
| 421 | c1cnc2c1cn[nH]2                    | C14985617 | -17.64 | -1.74 | -19.52 | 4.66 | -1.04 |
| 422 | Cc1ccc(cc1)S                       | C19230140 | -17.64 | -0.01 | -15.27 | 1.6  | -3.96 |
| 423 | Cc1c(ccc1N)F                       | W2004A010 | -17.64 | -3.45 | -14.69 | 2.85 | -2.35 |
| 424 | c1c(cnc(c1F)F)Cl                   | C02525803 | -17.63 | -0.95 | -17.91 | 2.42 | -1.19 |
| 425 | c1c(c(nc(n1)N)N)N                  | C08294936 | -17.63 | -5.62 | -18.14 | 5.19 | 0.94  |
| 426 | c1cc(sc1)CNO                       | C01698346 | -17.62 | -3.38 | -17.25 | 2.9  | 0.11  |
| 427 | c1cc2c(nc1)n[n-]n2                 | C05117290 | -17.62 | -5.93 | -18.72 | 7.86 | -0.83 |
| 428 | c1cc(ncc1Br)N[+](=O)[O-]           | C01020848 | -17.61 | -1.21 | -19.44 | 6.49 | -3.45 |
| 429 | c1c(c(cc1F)N)Cl)N                  | C04334592 | -17.61 | -4.05 | -15.08 | 2.19 | -0.66 |
| 430 | c1nc(n2c(n1)nnc2)N                 | C08618478 | -17.61 | -2.88 | -17.49 | 7.73 | -4.97 |
| 431 | CCOc1ccccc1                        | C01599383 | -17.6  | -1.66 | -14.79 | 2.45 | -3.61 |
| 432 | c1cc(c(cc1F)F)N=O                  | C16158150 | -17.6  | -0.52 | -17.62 | 2.92 | -2.38 |
| 433 | c1ccc(cc1)C=NN                     | C17289008 | -17.6  | 0.39  | -18.68 | 2.86 | -2.17 |
| 434 | c1ccn(c1)N[+](=O)[O-]              | C00085310 | -17.59 | -1.21 | -20.86 | 7.48 | -3    |
| 435 | c1cc(c(nc1)Br)N                    | C00330809 | -17.59 | -3.31 | -17.51 | 4.2  | -0.97 |
| 436 | C=CCOC(=O)Cl                       | C02033143 | -17.59 | -0.59 | -16.28 | 1.86 | -2.58 |
| 437 | c1cc(c(nc1)N)CCl                   | C21984220 | -17.59 | -2.31 | -17.46 | 4.3  | -2.11 |
| 438 | c1c(cc(cc1F)F)NN                   | C00404219 | -17.58 | -2.69 | -15.99 | 2.81 | -1.72 |
| 439 | c1c(cc(cc1F)F)FCS                  | C04244671 | -17.58 | -1.12 | -16.92 | 2.42 | -1.96 |
| 440 | c1cc(c(cc1N)N)C#N                  | C09371615 | -17.58 | -2.29 | -19.61 | 4.7  | -0.38 |
| 441 | c1cc(c(cc1C#N)F)F                  | C00156995 | -17.57 | -0.87 | -17.3  | 4.29 | -3.69 |
| 442 | c1cc(oc1C[N+](=O)[O-])[N+](=O)[O-] | C02506785 | -17.57 | -2.37 | -18.15 | 7.09 | -4.14 |
| 443 | c1cc(c(cc1F)CS)F                   | C04244662 | -17.57 | 0.53  | -16.26 | 2.26 | -4.1  |
| 444 | c1cnc(c1F)Cl)F                     | C14982361 | -17.57 | -2.87 | -16.18 | 3.87 | -2.4  |
| 445 | c1c(c(c(c1F)F)N)F                  | C00406982 | -17.56 | -2    | -15.95 | 2.34 | -1.96 |
| 446 | CCOC(=O)C(=O)C(F)F                 | C02159467 | -17.56 | 0.42  | -16.95 | 1.97 | -3    |

|     |                               |           |        |       |        |      |       |
|-----|-------------------------------|-----------|--------|-------|--------|------|-------|
| 447 | c1cc(c(cc1F)C#N)N             | C02583740 | -17.56 | -2.11 | -17.7  | 4.27 | -2.03 |
| 448 | c1c(c(nc(c1Cl)F)F)F           | C02585567 | -17.56 | 0.47  | -18.7  | 2.28 | -1.6  |
| 449 | c1c[nH]c2c1cnnc2              | C06862802 | -17.56 | -3.18 | -17.58 | 5.85 | -2.65 |
| 450 | c1c(c[nH]c(=O)c1O)Cl          | C00388202 | -17.55 | -3.7  | -19.36 | 5.67 | -0.16 |
| 451 | c1ccc(cc1)C#CC=O              | C01679343 | -17.55 | -1.92 | -17.19 | 5.78 | -4.23 |
| 452 | c1ccc(cc1)Nc2[nH]nnc2         | C01742045 | -17.55 | -0.78 | -17.07 | 5.32 | -5.03 |
| 453 | Cc1c(n[nH]n1)[N+](=O)[O-]     | C13410797 | -17.55 | -4.21 | -16.66 | 4.85 | -1.52 |
| 454 | CSc1[nH]nc(n1)SC              | C01603478 | -17.54 | -2.8  | -16.66 | 4.46 | -2.55 |
| 455 | CC(=S)OCc1ccc1                | C05225743 | -17.54 | -1.81 | -17.15 | 4.71 | -3.3  |
| 456 | c1cc(ccc1/C=C/C=O)F           | C21993071 | -17.54 | -1.83 | -17.31 | 5.63 | -4.04 |
| 457 | c1cc(ccc1N)Br                 | C00013614 | -17.53 | -0.66 | -16.78 | 2.12 | -2.21 |
| 458 | c1cc(c(c(c1F)N)N              | C16158506 | -17.53 | -4.14 | -16.12 | 3.12 | -0.39 |
| 459 | C=CCN/C=C/\C=CC=[NH+]1        | C17378195 | -17.53 | 1.15  | -19.57 | 3.21 | -2.32 |
| 460 | c1cc(sc1)N=C=O                | C00158753 | -17.52 | -0.33 | -17.79 | 1.99 | -1.38 |
| 461 | c1cc(ccc1Cl)O)F               | C02528619 | -17.52 | -2.4  | -16.35 | 2.88 | -1.66 |
| 462 | c1cn[nH]c1[N+](=O)[O-]        | C04692780 | -17.52 | -1.19 | -18.33 | 4.12 | -2.12 |
| 463 | CNC(=O)n1c(nnn1)N             | C05510474 | -17.52 | -8.19 | -15.18 | 4.75 | 1.11  |
| 464 | c1cc(cnc1)CCC#N               | C08699947 | -17.51 | -1.2  | -19.5  | 6.66 | -3.46 |
| 465 | C(=[NH2+])(N)SSC(=[NH2+])N    | C12358898 | -17.51 | -4.38 | -17.71 | 3.51 | 1.07  |
| 466 | COC(=O)Cc1ccc1                | C00388061 | -17.5  | -0.28 | -17.69 | 4.96 | -4.49 |
| 467 | c1c(ccc1F)N                   | C08698158 | -17.5  | -3.91 | -16.27 | 3.22 | -0.55 |
| 468 | c1c(nc[nH]1)[N+](=O)[O-]      | C12358712 | -17.5  | -3.82 | -17.18 | 6.44 | -2.95 |
| 469 | c1c(ccc1)F                    | C14400906 | -17.5  | -0.74 | -15.3  | 1.44 | -2.9  |
| 470 | c1cc(ncc1)F                   | C14982824 | -17.5  | -1.32 | -15.51 | 2.24 | -2.91 |
| 471 | c1c(nc(nc1F)N)F               | C00967445 | -17.49 | -3.05 | -15.98 | 2.8  | -1.26 |
| 472 | C=CCOC(=O)C(F)(F)F            | C01577260 | -17.49 | -1.05 | -15.07 | 1.74 | -3.11 |
| 473 | c1cc([nH]c1)[N+](=O)[O-]      | C01561742 | -17.48 | -2.77 | -17.88 | 6.29 | -3.12 |
| 474 | c1c(c[nH]1)CCl)Cl             | C02552485 | -17.48 | -2.39 | -16.37 | 4.07 | -2.79 |
| 475 | C/C(=C/C(=O)C(F)(F)Cl)[O-]    | C04242400 | -17.48 | -5.42 | -12.46 | 2.88 | -2.48 |
| 476 | c1ccc1CCC#N                   | C04716436 | -17.48 | -1.95 | -18.96 | 6.83 | -3.4  |
| 477 | c1[n-]nc(n1)[N+](=O)[O-]      | C18206667 | -17.48 | -4.59 | -16.76 | 8.16 | -4.29 |
| 478 | c1cc(ncc1N=C=O)C(F)(F)F       | C22010714 | -17.48 | -1.51 | -18.31 | 3.65 | -1.31 |
| 479 | c1cc(sc1)[N+](=O)[O-]         | C01680876 | -17.47 | -2.75 | -17.81 | 6.3  | -3.21 |
| 480 | C#Cc1ccc1                     | C02526546 | -17.47 | -0.49 | -16.4  | 2.86 | -3.45 |
| 481 | c1cc(sc1)C(F)(F)F             | C02541355 | -17.47 | -2.31 | -15.58 | 2.4  | -1.99 |
| 482 | c1cc(ncc1[N+](=O)[O-])Cl      | C02564034 | -17.47 | -2.58 | -15.76 | 3.78 | -2.91 |
| 483 | c1c(cc(c(c1N)[N+](=O)[O-])F)F | C04416633 | -17.47 | -2.85 | -16.46 | 4.37 | -2.53 |
| 484 | c1ccc(cc1)/C(=N/O)/C#N        | C05239373 | -17.47 | -1.61 | -18.79 | 4.69 | -1.75 |
| 485 | c1c(nc(nc1F)F)F)F             | C06090883 | -17.47 | 0.18  | -16.71 | 0.63 | -1.57 |
| 486 | c1cn2cnc2cn1                  | C12356946 | -17.47 | -2.43 | -18.6  | 6.09 | -2.52 |
| 487 | Cc1ccc(c(c1N)Br               | C08701094 | -17.46 | -2.7  | -13.88 | 1.93 | -2.82 |
| 488 | c1ccc1Br                      | C00158596 | -17.45 | -0.86 | -16.48 | 2.28 | -2.39 |
| 489 | C=NC1C=CCC=C1                 | C01764765 | -17.45 | -1.61 | -16.44 | 2.97 | -2.38 |
| 490 | Cc1cncc1                      | C01852614 | -17.45 | -1.85 | -16.82 | 3.6  | -2.38 |
| 491 | c1cc(c(cc1F)F)CS              | C04244661 | -17.45 | -1.3  | -17.31 | 2.57 | -1.4  |
| 492 | Cc1[n-]cc(n1)[N+](=O)[O-]     | C18172810 | -17.45 | -2.35 | -17.47 | 5.37 | -3    |
| 493 | Cc1c(ccc1F)N                  | C00407040 | -17.44 | -3.41 | -14.52 | 2.85 | -2.35 |
| 494 | c1c(ccc1)Cl)[N+](=O)[O-]      | C01420771 | -17.44 | -2.83 | -16.4  | 4.29 | -2.51 |
| 495 | c1c(cnc(n1)F)Br               | C04198784 | -17.44 | -1.05 | -17.47 | 3.01 | -1.93 |
| 496 | C#CCNC(=O)n1ccnc1             | C32628565 | -17.44 | -3.47 | -18.67 | 7.63 | -2.93 |
| 497 | CC(=O)Oc1ccc(cc1F)F           | C00152763 | -17.43 | 1.41  | -20.05 | 5.61 | -4.4  |
| 498 | c1ccc(cc1)N                   | C00334520 | -17.43 | -2.89 | -15.84 | 2.52 | -1.23 |
| 499 | c1c(c(cc(c1F)F)N)N            | C02600068 | -17.42 | -4.59 | -16.88 | 4.47 | -0.42 |
| 500 | c1c(c(cc(c1F)F)F)C#N          | C00389514 | -17.41 | 1.4   | -18.75 | 3.49 | -3.54 |
| 501 | C#Cc1ccc(cc1)Br               | C02534482 | -17.41 | -0.09 | -15.41 | 2.8  | -4.7  |
| 502 | c1cnc(cn1)CCS                 | C04802601 | -17.41 | -0.59 | -18.36 | 3.48 | -1.94 |
| 503 | c1ccc(cc1)C(=N/C#N)N          | C15889046 | -17.41 | 0.37  | -18.99 | 6.26 | -5.05 |
| 504 | c1c(c(ncn1)N)C#N              | C00165356 | -17.4  | -2.27 | -18.07 | 4.11 | -1.18 |
| 505 | c1c(c(cc(c1F)F)O)N            | C02243122 | -17.4  | -5.37 | -16.51 | 4.22 | 0.25  |
| 506 | c1cc(cc(c1)N)N                | C00164650 | -17.39 | -3.52 | -16.35 | 2.59 | -0.11 |
| 507 | Cc1ncc(c(n1)N)C#N             | C00165358 | -17.39 | -2.93 | -17.29 | 4.04 | -1.21 |
| 508 | CSc1ccc(cc1)O                 | C00404129 | -17.39 | -0.05 | -18.65 | 3.28 | -1.96 |
| 509 | CNC(=O)n1c(ncn1)N             | C08628619 | -17.39 | -6.65 | -15.32 | 6.2  | -1.61 |
| 510 | c1cc(ccc1N)OC(F)F             | C00167204 | -17.38 | -3.43 | -16.87 | 4.37 | -1.45 |
| 511 | c1nc(ncn1)C(=O)N)N            | C17046277 | -17.38 | -5.83 | -17.51 | 6.44 | -0.47 |
| 512 | c1cnc(c(n1)N)Cl               | C01101989 | -17.37 | -3.42 | -17.97 | 4.14 | -0.12 |
| 513 | c1cc(ccc1OC(F)F)Cl            | C19735925 | -17.37 | -3.4  | -14.06 | 3.52 | -3.44 |
| 514 | Cc1ccsc1                      | C01692445 | -17.36 | -0.63 | -15.18 | 1.5  | -3.05 |
| 515 | c1c(cnc(c1F)N)Cl              | C16158481 | -17.36 | -1.21 | -17.49 | 2.85 | -1.51 |
| 516 | c1cc(ccc1C(F)(F)F)N           | C00164442 | -17.35 | -2.32 | -15.41 | 2.77 | -2.39 |
| 517 | c1cc(c(nc1)Cl)N               | C00164466 | -17.35 | -3.54 | -17.13 | 4.22 | -0.9  |
| 518 | c1c(c(=O)[nH]c(=O)[nH]1)SC#N  | C03013979 | -17.35 | -3.6  | -21.84 | 6.87 | 1.22  |
| 519 | C(#N)Sc1c(non1)[N+](=O)[O-]   | C04343705 | -17.35 | -1.51 | -17.52 | 3.92 | -2.24 |
| 520 | c1cc(=O)occ1Cl                | C21989740 | -17.35 | -1.56 | -18.18 | 5.48 | -3.09 |
| 521 | c1c(cnc(c1F)F)F               | C02585569 | -17.34 | -0.82 | -16.98 | 2.56 | -2.11 |
| 522 | c1ccc(cc1)CSC(=[NH2+])N       | C03874922 | -17.34 | -1.64 | -15.97 | 2.9  | -2.62 |
| 523 | c1(c(ncn1)N)C(=O)NN           | C03882149 | -17.34 | -5.77 | -17.83 | 4.22 | 2.04  |
| 524 | c1cc(c(cc1F)F)/C=C/C=O        | C14982651 | -17.34 | -2.81 | -15.39 | 5.05 | -4.18 |
| 525 | Fc1ccc1                       | M1995A008 | -17.34 | -1.11 | -14.97 | 2.13 | -3.39 |
| 526 | c1c(cc(c(c1N)O)F)F            | C02386500 | -17.33 | -4.46 | -16.58 | 3.44 | 0.27  |
| 527 | C#Cc1ccc(cc1)O                | C02555301 | -17.33 | -0.29 | -18.78 | 3.79 | -2.05 |
| 528 | c1ccc(c(c1)CC=O)F             | C02581173 | -17.33 | -0.83 | -18.48 | 3.84 | -1.86 |
| 529 | C(=C(C(F)(F)F)O)C(=O)C(F)(F)F | C12360020 | -17.33 | -5.05 | -13.65 | 3.29 | -1.92 |
| 530 | CNc1nc(no1)[N+](=O)[O-]       | C15782381 | -17.33 | -5.19 | -16.23 | 5.62 | -1.54 |
| 531 | COC(=O)CNC1ncc1               | C21795809 | -17.33 | -3.68 | -15.94 | 4.43 | -2.14 |
| 532 | c1cc(ccc1CCC#N)F              | C31829538 | -17.33 | -1.68 | -17.06 | 6.29 | -4.88 |
| 533 | c1cnccc1Cl                    | C00402776 | -17.32 | -0.45 | -16.93 | 2.35 | -2.28 |
| 534 | CCc1ccc1N                     | C02039219 | -17.32 | -1.58 | -14.02 | 1.81 | -3.53 |
| 535 | c1cc(c(cc1F)O)N               | C02567357 | -17.32 | -3.18 | -17.98 | 3.58 | 0.26  |
| 536 | C(=O)C(F)(F)Cl)C(F)(F)Cl      | C04254804 | -17.32 | 0.43  | -15.18 | 0.29 | -2.85 |

|     |                                 |           |        |       |        |       |       |
|-----|---------------------------------|-----------|--------|-------|--------|-------|-------|
| 537 | c1c2c(n[nH]c2ncn1)N             | C13362450 | -17.32 | -3.63 | -18.53 | 5.86  | -1.01 |
| 538 | c1c(cn(n1)[N+](=O)[O-])Br       | C02390475 | -17.31 | -1.86 | -18.3  | 3.73  | -0.88 |
| 539 | C(=O)(C(F)F)Cl)Br               | C04329285 | -17.31 | -0.27 | -15.41 | 0.46  | -2.1  |
| 540 | c1c(nc(s1)N)Br                  | C17044502 | -17.31 | -1.32 | -16.5  | 1.91  | -1.4  |
| 541 | c1cc(c(c1)F)Cl)O                | C21304466 | -17.31 | -1.93 | -17.05 | 3.39  | -1.72 |
| 542 | c1ccc(cc1)CSC#N)F               | C32138414 | -17.31 | -1.22 | -16.05 | 4.57  | -4.61 |
| 543 | Cc1cccs1                        | C02034789 | -17.3  | -1.22 | -14.57 | 1.66  | -3.17 |
| 544 | c1cc(c(cc1F)O)Cl                | C02584351 | -17.3  | -0.59 | -17.67 | 2.63  | -1.67 |
| 545 | c1cc(ccc1N=O)N=O                | C04404450 | -17.3  | -2.23 | -17.52 | 3.41  | -0.97 |
| 546 | c1c(cnc(c1N)Br)F                | C02546107 | -17.29 | -3.87 | -17.49 | 2.91  | 1.16  |
| 547 | c1c(c(c(c1F)F)N)[N+](=O)[O-])F  | C04416631 | -17.29 | -2.41 | -15.28 | 2.97  | -2.58 |
| 548 | c1ccc(cc1)Sc2c[nH]cn2           | C06188344 | -17.29 | -1.04 | -16.2  | 4.79  | -4.83 |
| 549 | c1csc(n1)NC#N                   | C13638831 | -17.29 | -2.01 | -17.51 | 6.14  | -3.91 |
| 550 | c1cc(ncc1C#N)Cl                 | C00166496 | -17.28 | -1.25 | -17.68 | 4.31  | -2.66 |
| 551 | c1ccc2c(c1)c(on2)[O-]           | C01681296 | -17.28 | -1.92 | -17.19 | 5.26  | -3.43 |
| 552 | c1c(nc([nH]1)Cl)[N+](=O)[O-]    | C05425251 | -17.28 | -1.7  | -18.57 | 3.13  | -0.14 |
| 553 | c1ccc(cc1)OC=O                  | C08294965 | -17.27 | -0.13 | -19.62 | 5.99  | -3.51 |
| 554 | c1cnc2c1cco2                    | C15444681 | -17.27 | -1.67 | -17.77 | 4.5   | -2.33 |
| 555 | [H]N=C(N)Nc1cnoc1               | C26510247 | -17.27 | -3.51 | -19.8  | 6.77  | -0.72 |
| 556 | CSc1nc([nH]1)N                  | C17019767 | -17.26 | -3.76 | -17.75 | 6.04  | -1.79 |
| 557 | C=CCOC(=O)OCC#N                 | C01733700 | -17.25 | -2.35 | -17.01 | 5.28  | -3.17 |
| 558 | c1c(csn1)Br                     | C04344132 | -17.25 | -0.68 | -16.63 | 2.02  | -1.95 |
| 559 | c1cnc1CN=C=S                    | C09239750 | -17.25 | -0.61 | -17.77 | 3.5   | -2.37 |
| 560 | c1c(cnc(c1)C#N)Br               | C00053986 | -17.24 | 0.51  | -19.35 | 3.76  | -2.16 |
| 561 | CCn1ccccc1                      | C01866964 | -17.24 | -1.38 | -14.72 | 2.63  | -3.76 |
| 562 | c1cc(c(nc1)N=O)N=O              | C05495396 | -17.24 | -2.53 | -20.65 | 6.77  | -0.83 |
| 563 | c1cc(ncc1[N+](=O)[O-])N         | C18810124 | -17.24 | -4.36 | -17.27 | 5.92  | -1.53 |
| 564 | c1c(c(c(c1)F)F)N)F              | C02386504 | -17.23 | -2.84 | -16.81 | 2.94  | -0.52 |
| 565 | c1c(snn1)C(=O)Cl                | C12428346 | -17.23 | -1.36 | -17.79 | 3.03  | -1.11 |
| 566 | C[C@H]1C=C[C@@H]2COCC2=C1       | C18529659 | -17.23 | -1.01 | -14.83 | 1.87  | -3.26 |
| 567 | c1cc(ccc1O)Cl                   | C00001885 | -17.22 | -0.44 | -17.71 | 2.49  | -1.55 |
| 568 | c1ccc2c(c1)c(no2)N              | C00161908 | -17.22 | -3.75 | -16.68 | 5.29  | -2.08 |
| 569 | C#Cc1ccncc1                     | C02506783 | -17.22 | -0.83 | -17.44 | 3.83  | -2.78 |
| 570 | c1ccc(cc1)N=O                   | C04097291 | -17.22 | -1.82 | -17.01 | 3.77  | -2.16 |
| 571 | c1cc(c(nc1))N                   | C04352695 | -17.22 | -3.71 | -15.99 | 3.83  | -1.35 |
| 572 | c1([nH]nn1)C([N+](=O)[O-])(F)F  | C04948492 | -17.22 | -4.1  | -17.69 | 3.96  | 0.61  |
| 573 | c1c(cn2c(n1)ncn2)Br             | C20281956 | -17.22 | -3.05 | -16.13 | 6.6   | -4.64 |
| 574 | c1c(c(c(c1F)F)N)F)F             | C00388050 | -17.21 | -2.95 | -14.15 | 1.84  | -1.95 |
| 575 | c1cc(oc1)/C=C/C#N               | C01592389 | -17.21 | -0.99 | -17.72 | 4.8   | -3.31 |
| 576 | c1cc(ccc1N=C=O)Br               | C03861690 | -17.21 | -1.48 | -17.02 | 1.51  | -0.22 |
| 577 | CC(=O)OCC1CCCC1                 | C00157134 | -17.2  | 0.35  | -17.73 | 4.87  | -4.69 |
| 578 | c1cc(c(c1)F)CC#N)F              | C00409205 | -17.2  | 0.01  | -19.47 | 5.42  | -3.16 |
| 579 | c1ccccc1                        | E1992A001 | -17.2  | -0.7  | -14.48 | 1.34  | -3.35 |
| 580 | c1cc(c(nc1)CBr)O                | C00300814 | -17.19 | -1.62 | -18.19 | 3.7   | -1.07 |
| 581 | c1cc(sc1)CC#N                   | C00388254 | -17.19 | -1.32 | -17.94 | 5.65  | -3.58 |
| 582 | c1cc(c(c1F)N)F)F                | C00409370 | -17.19 | -2.58 | -15.4  | 2.71  | -1.92 |
| 583 | Cn1c(ncn1)[N+](=O)[O-]          | C02760423 | -17.19 | -1.48 | -15.67 | 4.59  | -4.63 |
| 584 | CC(=O)O[NH+]=c1/c-2no[n-]c2ncn1 | C05624866 | -17.19 | -2.96 | -18.25 | 7.68  | -3.65 |
| 585 | c1cc(oc1N=C=O)Br                | C19505118 | -17.19 | -2.16 | -16.89 | 1.96  | -0.1  |
| 586 | c1(c(no[nH]1)[O-])N(C(=O)N      | C03894822 | -17.18 | -6.4  | -17.27 | 5.35  | 1.14  |
| 587 | Cc1c(ncn1)C(=[NH+]/N)/N         | C04342582 | -17.18 | -6.21 | -18.04 | 4.59  | 2.47  |
| 588 | CC(=C1C(=O)CCC1=O)[O-]          | C05855021 | -17.18 | -4.85 | -16.17 | 5.73  | -1.88 |
| 589 | c1cc(c(cc1F)N)N)F               | C00153197 | -17.17 | -0.56 | -17.45 | 2.55  | -1.71 |
| 590 | c1cc(cc(c1)F)NN                 | C00164739 | -17.17 | -2.1  | -16.89 | 3.46  | -1.64 |
| 591 | c1c2c([nH]c(n2)N)ncn1           | C02382956 | -17.17 | -5.34 | -18.18 | 8.53  | -2.17 |
| 592 | Cc1c(ncn1)C(=[NH+]/N)/N         | C05380617 | -17.17 | 0.32  | -16.05 | 1.14  | -2.59 |
| 593 | c1cc(c(cc1F)F)CC#N              | C00155244 | -17.16 | -1.71 | -19.24 | 7.03  | -3.24 |
| 594 | c1cnc1[N+](=O)[O-]              | C00332351 | -17.16 | -2.19 | -16.8  | 4.4   | -2.57 |
| 595 | CCc1ccccc1                      | C08294956 | -17.16 | -1.04 | -15.91 | 2.96  | -3.17 |
| 596 | c1cc(c(nc1)N)C#N                | C19486678 | -17.16 | -2.22 | -18.47 | 4.81  | -1.27 |
| 597 | c1cc(c(c1)F)N)F                 | C00159273 | -17.15 | -0.97 | -16.73 | 2.48  | -1.93 |
| 598 | c1cc(cc(c1)F)CC#N               | C00404417 | -17.15 | -1.22 | -18.32 | 6.68  | -4.29 |
| 599 | C/C(=C/CC)/[N+](=O)[O-]         | C01733879 | -17.15 | -1.51 | -16.07 | 4.03  | -3.6  |
| 600 | CC(=O)OCC1CCCC1                 | C02149530 | -17.15 | -0.85 | -18.85 | 5.73  | -3.18 |
| 601 | c1cc(nc(c1Br)N)N                | C19862891 | -17.15 | -3.68 | -17.44 | 4.57  | -0.59 |
| 602 | COCC(=O)Cc1ccsc1                | C00156981 | -17.14 | -0.22 | -18.14 | 4.92  | -3.7  |
| 603 | Cc1cc(nc1)N/C=N/O               | C15906885 | -17.14 | -2.04 | -19.29 | 5.99  | -1.8  |
| 604 | CCNc1ccc(cc1F)F                 | C19952389 | -17.14 | -1.65 | -14.59 | 2.39  | -3.29 |
| 605 | Cc1c(nc(nc1F)F)F                | C02025691 | -17.13 | -1.26 | -16.16 | 2.12  | -1.83 |
| 606 | c1c(c(cnc1F)F)F                 | C02540460 | -17.13 | -0.84 | -16.34 | 2.17  | -2.11 |
| 607 | C/C=C/C1ccc(cc1)O               | C13526620 | -17.13 | -0.59 | -16.79 | 2.77  | -2.52 |
| 608 | c1c(c(c(cn1)F)Cl)F              | C14982370 | -17.13 | -0.31 | -16.36 | 2.07  | -2.53 |
| 609 | c1nn2c(nnc2n1)N)N               | C17141944 | -17.13 | -5.13 | -18.94 | 11.26 | -4.33 |
| 610 | c1cc(ccc1N)NCC=O                | C02556302 | -17.12 | -4.77 | -18.75 | 6.41  | -0.01 |
| 611 | c1c(c(ncn1)Cl)F                 | C15444654 | -17.12 | -0.11 | -17.53 | 2.78  | -2.25 |
| 612 | C#Cc1ccc(cn1)Br                 | C21981757 | -17.12 | -0.66 | -17.58 | 4.57  | -3.45 |
| 613 | c1c(cnc1)C(Cl)[N+](=O)[O-]      | C02569105 | -17.11 | -3.04 | -17.91 | 6.75  | -2.91 |
| 614 | c1c(c(c(c1)F)F)Cl)F             | C16159842 | -17.11 | -0.18 | -16.74 | 2.14  | -2.32 |
| 615 | C/C(=C/O)/C(=O)C                | C17129866 | -17.11 | -5.55 | -15.29 | 5.23  | -1.5  |
| 616 | CCOC(=O)c1cc[nH]n1              | C18161725 | -17.11 | -1.52 | -18.47 | 5     | -2.12 |
| 617 | c1c(c(cnc1F)F)Cl                | C21991290 | -17.11 | 0.14  | -16.96 | 2.01  | -2.3  |
| 618 | C#CCNc1ccccc1                   | C01737352 | -17.1  | -1.83 | -14.11 | 2.47  | -3.63 |
| 619 | c1cnc1(c1Cl)F                   | C02598038 | -17.1  | -0.52 | -16.91 | 2.68  | -2.34 |
| 620 | Cc1cnc1F                        | C02599065 | -17.1  | -1.6  | -17.06 | 2.63  | -1.06 |
| 621 | c1c2c(c(ncn2)N)n[nH]1           | C04822317 | -17.1  | -3.99 | -18.79 | 5.64  | 0.04  |
| 622 | c1c([nH]nc1C(F)F)C(=O)Cl        | C12357635 | -17.1  | -6.43 | -13.14 | 3.35  | -0.88 |
| 623 | c1ccc(cc1)N=C(N)N               | C04276940 | -17.09 | 0.77  | -20.44 | 4.95  | -2.37 |
| 624 | c1([nH]nn1)C(F)F)F              | C06523903 | -17.09 | -5.8  | -14.62 | 3.52  | -0.18 |
| 625 | c1c(c(c(cn1)F)F)C(F)F)F         | C16159826 | -17.09 | -1.53 | -15.37 | 2.69  | -2.87 |
| 626 | c1cc(ncc1C(F)F)C(=O)Cl          | C30715018 | -17.09 | -2.26 | -14.73 | 3.04  | -3.14 |

|     |                                           |           |        |       |        |       |       |
|-----|-------------------------------------------|-----------|--------|-------|--------|-------|-------|
| 627 | c1ccc(cc1)C(=O)[S-]                       | C05226314 | -17.08 | -3.75 | -17.01 | 6.04  | -2.36 |
| 628 | c1ccc(c(c1)NC(=O)N)F                      | C00156334 | -17.07 | -3.07 | -19.51 | 6.06  | -0.55 |
| 629 | c1cnoc1C(F)(F)Cl                          | C02540175 | -17.07 | -0.29 | -16.78 | 2.71  | -2.72 |
| 630 | C=CCOC(=O)Cl                              | C02545380 | -17.07 | -0.41 | -15.23 | 1.73  | -3.15 |
| 631 | c1ccnc(c1)CCCl                            | C12360602 | -17.07 | 0.39  | -16.59 | 2.84  | -3.71 |
| 632 | C=Cc1cnccn1                               | C00152334 | -17.06 | -2.19 | -17.19 | 3.97  | -1.65 |
| 633 | CC(=O)Oc1cccc1                            | C00388064 | -17.06 | 0.62  | -18.97 | 5.59  | -4.29 |
| 634 | C=Cc1cncc1                                | C01769024 | -17.06 | -1.45 | -15.92 | 3.09  | -2.78 |
| 635 | Cc1ccnc1                                  | C08294958 | -17.06 | -1.44 | -16.09 | 2.96  | -2.5  |
| 636 | CC(=O)c1c(no[n+][O-])N                    | C08727464 | -17.06 | -4.36 | -16.66 | 5.49  | -1.53 |
| 637 | c1c(c(cc1F)F)O)C#N                        | C12359158 | -17.06 | -1.51 | -18.61 | 4.67  | -1.61 |
| 638 | C(C)OC(=O)C(F)F                           | C16082642 | -17.06 | -1.13 | -15.93 | 3.16  | -3.16 |
| 639 | c1(c(non1)N)/C(=N)O)/N                    | C18324333 | -17.06 | -5.11 | -17.48 | 3.45  | 2.07  |
| 640 | c1cnccc1                                  | C00161788 | -17.05 | -0.92 | -15.46 | 2.1   | -2.78 |
| 641 | c1cc(ncc1C#N)Br                           | C02559904 | -17.05 | -1.3  | -17.25 | 4.22  | -2.72 |
| 642 | C(=O)C(F)Br)Cl                            | C04241563 | -17.05 | -0.11 | -15.25 | 0.42  | -2.11 |
| 643 | c1cc(cnc1)N)N                             | C19074690 | -17.05 | -4.08 | -17.08 | 3.88  | 0.23  |
| 644 | c1ccc(cc1)COC(=O)N                        | C00157187 | -17.04 | 0.07  | -21.98 | 5.59  | -0.72 |
| 645 | c1cc(ccc1NC(=O)N)F                        | C00395190 | -17.04 | -3.01 | -20.66 | 7.14  | -0.51 |
| 646 | c1ccnc(c1)NCC#N                           | C28294859 | -17.04 | -3.82 | -17.35 | 6.47  | -2.33 |
| 647 | O=N(=O)c1cccc1                            | ntrbnz1   | -17.04 | -2.55 | -16.06 | 5.44  | -3.87 |
| 648 | c1ccc(cc1)SC(=O)Cl                        | C00394908 | -17.03 | -1.15 | -18.58 | 3.24  | -0.54 |
| 649 | c1cc(sc1N)S                               | C01095798 | -17.03 | -2.87 | -15.33 | 2.34  | -1.17 |
| 650 | c1c(cnc1n)N)I                             | C01679675 | -17.03 | -1.08 | -16.43 | 2.73  | -2.26 |
| 651 | c1c(c(c(c(c1F)F)F)F)F                     | L2009A001 | -17.03 | 0.17  | -15.68 | 2.03  | -3.55 |
| 652 | c1cc(c(cc1F)F)C#N                         | C00159425 | -17.02 | -0.05 | -17.63 | 4.31  | -3.66 |
| 653 | c1c(ncc1n1)Cl)Cl                          | C01581403 | -17.02 | -1.53 | -16.27 | 2.29  | -1.51 |
| 654 | c1cc(c(cc1F)CC=O)F                        | C02581082 | -17.02 | -0.54 | -18.14 | 4.09  | -2.43 |
| 655 | C#CNc1cnc(n1)[N+](=O)[O-]                 | C08295833 | -17.02 | -3.72 | -18.53 | 11.17 | -5.94 |
| 656 | c1ccnc(c1)CCC#N                           | C14987721 | -17.02 | -0.32 | -18.53 | 5.45  | -3.62 |
| 657 | c1(nnc1n1)N)N                             | C16891524 | -17.02 | -5.98 | -14.47 | 4.57  | -1.14 |
| 658 | Cc1c(cccn1)N                              | C00331888 | -17.01 | -3    | -16.71 | 3.78  | -1.07 |
| 659 | C=Cn1cnan1                                | C01083359 | -17.01 | -3.01 | -16.74 | 6.26  | -3.52 |
| 660 | c1ccc(cc1)[C@@H](C#CCO)O                  | C02347098 | -17.01 | -1.02 | -21.29 | 5.9   | -0.6  |
| 661 | C#CCOC(=O)Cl                              | C02387284 | -17.01 | -0.58 | -16.7  | 2.64  | -2.37 |
| 662 | c1(c([nH]nc1N)N)[N+](=O)[O-]              | C04624940 | -17.01 | -4.49 | -18.94 | 5.96  | 0.45  |
| 663 | c1ccc(cc1)Nc2nns2                         | C00401042 | -17    | -0.71 | -19.75 | 2.34  | 1.12  |
| 664 | c1ccc(cc1)CN=C=S                          | C01529592 | -17    | -0.01 | -15.45 | 2.21  | -3.75 |
| 665 | CNc1ccc(cc1)F                             | C01847398 | -17    | -2.38 | -14.61 | 2.61  | -2.62 |
| 666 | C#Cc1cccs1                                | C02576039 | -17    | -0.53 | -16.38 | 3.49  | -3.58 |
| 667 | c1c(sc1n)Br                               | C04198797 | -17    | -1.11 | -16.84 | 2.68  | -1.73 |
| 668 | c1c(cc(c(c1F)N)F)N                        | C04334615 | -17    | -1.66 | -17.77 | 2.67  | -0.24 |
| 669 | Cc1cc([nH]n1)[N+](=O)[O-]                 | C18166915 | -17    | -0.67 | -17.3  | 3.63  | -2.65 |
| 670 | c1ccc(c(c1)F)I                            | C00164528 | -16.99 | 1.04  | -16.38 | 2.58  | -4.24 |
| 671 | C/C=C/c1ccncc1                            | C25489416 | -16.99 | -1.68 | -14.89 | 3.04  | -3.46 |
| 672 | c1cc(c(cc1F)N)O                           | C02555148 | -16.98 | -3.37 | -17.08 | 3.19  | 0.28  |
| 673 | c1ccn(c1)CCBr                             | C02556775 | -16.97 | -0.99 | -13.97 | 2.29  | -4.31 |
| 674 | c1c(c(nc(=S)[nH]1)N)C#N                   | C00169893 | -16.96 | -3.61 | -16.5  | 3.86  | -0.72 |
| 675 | c1ccc(cc1)COC=O                           | C01530244 | -16.96 | 0.34  | -21.12 | 7.75  | -3.93 |
| 676 | c1nc(c(c1)F)F)F                           | C02546080 | -16.96 | -1.58 | -15.88 | 2.39  | -1.89 |
| 677 | c1cc(c(cc1N)F)Cl                          | C02572861 | -16.96 | -3.51 | -14.65 | 3.28  | -2.09 |
| 678 | c1cc(ncc1)C#N                             | C30677683 | -16.96 | -1.98 | -15.8  | 3.97  | -3.15 |
| 679 | Cc1ccnc(n1)NC#N                           | C01693055 | -16.95 | -2.8  | -14.8  | 5.97  | -5.31 |
| 680 | c1cc(ccc1CC=O)F                           | C02581175 | -16.95 | -1.12 | -18.95 | 5.05  | -1.93 |
| 681 | c1c([nH]c2c1cc(cn2)C#N                    | C06643342 | -16.95 | -0.85 | -18.79 | 5.83  | -3.14 |
| 682 | c1cc(c2c1F)cn[nH]2)F                      | C14986073 | -16.95 | -1.37 | -16.8  | 3.59  | -2.37 |
| 683 | c1cc(ccc1N)S                              | C19850183 | -16.95 | -3.25 | -15.16 | 3.21  | -1.75 |
| 684 | c1ccc(c(c1)O)Cl                           | C00402767 | -16.94 | -1.11 | -17.21 | 3.07  | -1.68 |
| 685 | C=CC1=CSSN1                               | C01624249 | -16.94 | -1.48 | -16.94 | 3     | -1.51 |
| 686 | CSs1[nH]ncc1                              | C03165681 | -16.94 | -3.06 | -15.98 | 4.24  | -2.15 |
| 687 | c1c(c([nH]1)[N+](=O)[O-])Cl               | C04086103 | -16.94 | -1.36 | -17.19 | 3.91  | -2.3  |
| 688 | Cc1ccc(c(c1)N)C#N                         | C04272117 | -16.94 | -2.42 | -15.84 | 3.83  | -2.52 |
| 689 | c1cc(c(cc1F)F)C)N                         | C19267642 | -16.94 | 0.29  | -18.52 | 2.68  | -1.39 |
| 690 | c1cscc1CC#N                               | C00157111 | -16.93 | -1.2  | -17.92 | 5.63  | -3.44 |
| 691 | c1cc(c(cc1F)CC#N)F                        | C00409204 | -16.93 | -1.28 | -18.28 | 5.86  | -3.23 |
| 692 | Cc1ccc(s1)C#N                             | C01756772 | -16.93 | -0.35 | -16.57 | 3.56  | -3.56 |
| 693 | c1cnc(nc1)N/C=N/O                         | C15934902 | -16.93 | -3.86 | -17.7  | 7.09  | -2.46 |
| 694 | c1cncc1Br                                 | C20358092 | -16.93 | -1.19 | -16.95 | 3.45  | -2.26 |
| 695 | C#Cc1cc(cc1N)F)F                          | C21987735 | -16.93 | -2.71 | -15.4  | 3.95  | -2.76 |
| 696 | c1c(cnc(c1F)N)OC(F)F)F                    | C30677975 | -16.93 | -1.37 | -17.46 | 2.89  | -1    |
| 697 | CC(=O)c1ccc(s1)C#N                        | C00128854 | -16.92 | -0.95 | -17.14 | 4.58  | -3.4  |
| 698 | c1ccc(cc1)c2nc[nH]n2                      | C02027091 | -16.92 | 0.62  | -19.92 | 6.29  | -3.91 |
| 699 | c1ccc(cc1)ON                              | C00391872 | -16.91 | -0.77 | -17.6  | 3.11  | -1.64 |
| 700 | c1ccc(cc1)OC(F)F                          | C01559023 | -16.91 | -3.13 | -14.6  | 3.92  | -3.1  |
| 701 | c1c(ncnc1)F)F                             | C02529895 | -16.91 | -0.19 | -16.27 | 1.71  | -2.16 |
| 702 | c1cc(c(cc1C#N)F)Br                        | C14989287 | -16.91 | -1.69 | -14.83 | 3.69  | -4.09 |
| 703 | c1c(ncnc1)Cl)F                            | C15444568 | -16.91 | -0.69 | -16.5  | 2.48  | -2.2  |
| 704 | C=CCOC(=O)C(F)F)Cl                        | C16159461 | -16.91 | 0     | -14.93 | 1.43  | -3.41 |
| 705 | c1(c(non1)N)C(=O)N                        | C05670118 | -16.9  | -5.19 | -17.43 | 3.67  | 2.05  |
| 706 | c1ccc(cc1)S(=O)(=O)N=C([NH-])\N+](=O)[O-] | C16939446 | -16.9  | 1.98  | -21.5  | 6.05  | -3.43 |
| 707 | c1cnc(nc1N)N                              | C01661391 | -16.89 | -4.75 | -16.45 | 4.83  | -0.52 |
| 708 | c1c(c(c(nc1F)F)F)F                        | C02585566 | -16.89 | -0.29 | -16.78 | 2.24  | -2.06 |
| 709 | c12c(nc3c(n1)n[n+](n3)[O-])no[nH]2        | C06862763 | -16.89 | -4.21 | -16.72 | 4.59  | -0.55 |
| 710 | c1cnc(cn1)SC#N                            | C00331847 | -16.88 | -1.28 | -20.28 | 6.02  | -1.34 |
| 711 | COc1ccc(cc1)F                             | C00404414 | -16.88 | -2.56 | -13.98 | 2.56  | -2.91 |
| 712 | c1cc(c(cc1Cl)F)N                          | C00409384 | -16.88 | -0.82 | -16.25 | 2.36  | -2.17 |
| 713 | c1ccc(cc1)[N+](=O)[O-]                    | C00896426 | -16.88 | -2.56 | -16.02 | 5.55  | -3.85 |
| 714 | c1cc(cc1C=O)Cl                            | C02584625 | -16.88 | -0.86 | -16.96 | 3.12  | -2.19 |
| 715 | C(=O)C(C(F)F)Cl)F)F)Cl                    | C14611410 | -16.88 | -0.06 | -14.66 | 0.59  | -2.75 |
| 716 | c1c(cnc(n1)Cl)Cl                          | C21298678 | -16.88 | -1.41 | -15.76 | 2.59  | -2.29 |

|     |                                         |           |        |       |        |      |       |
|-----|-----------------------------------------|-----------|--------|-------|--------|------|-------|
| 717 | c1cc(c(cc1N)N)F                         | C00404027 | -16.87 | -2.89 | -16.96 | 3.16 | -0.18 |
| 718 | c1n2c(n1)sc(n2)S                        | C06554273 | -16.87 | -2.64 | -18.71 | 6.51 | -2.03 |
| 719 | Cc1ccc(c(n1)N)C#N                       | C22011470 | -16.87 | -2.81 | -16.96 | 4.68 | -1.79 |
| 720 | c1c(c[nH]1)Br                           | C00967315 | -16.86 | -3.41 | -15.58 | 3.39 | -1.25 |
| 721 | c1cnoc1C(=O)Cl                          | C02170053 | -16.86 | 0.95  | -18.94 | 2.99 | -1.86 |
| 722 | c1cc(cc1)Br                             | C02558994 | -16.86 | -1.6  | -15.25 | 2.35 | -2.36 |
| 723 | c1cnc(n1)CS                             | C08100931 | -16.86 | -1.66 | -18.05 | 4.12 | -1.27 |
| 724 | c1cc(ncc1F)C=O                          | C08698202 | -16.86 | -3.46 | -14.86 | 3.34 | -1.89 |
| 725 | c1c(c(cnc1F))F                          | C21987582 | -16.86 | 0.51  | -16.23 | 1.67 | -2.81 |
| 726 | c1ccc2c(c1)con2                         | C00154777 | -16.85 | -1.95 | -17.9  | 6.04 | -3.04 |
| 727 | c1c(cc(cc1F)F)O                         | C00406989 | -16.85 | -2.51 | -15.46 | 2.46 | -1.34 |
| 728 | c1(=O)c(nnc1[nH]1)[O-][N+](=O)[O-]      | C05530560 | -16.85 | -4.96 | -16.81 | 5.15 | -0.23 |
| 729 | COC(=O)/C=C/N=[N+]=[N-]                 | C05760459 | -16.85 | -2.05 | -17.76 | 5.32 | -2.37 |
| 730 | CCOCc1cccc1N                            | C13346819 | -16.85 | -2.19 | -15.01 | 2.96 | -2.61 |
| 731 | Cc1ccc(cc1)/C=N/O                       | C17303025 | -16.85 | -2    | -17.01 | 4.37 | -2.21 |
| 732 | Cc1ccc(c(n1)N)Br                        | C19798390 | -16.85 | -3.32 | -14.75 | 3.28 | -2.06 |
| 733 | CSc1nc(sn1)Cl                           | C22112817 | -16.85 | -1.59 | -15.54 | 2.43 | -2.14 |
| 734 | c1c(cnc(n1)C(F)(F)F)Cl                  | C26440922 | -16.85 | -1.65 | -15.63 | 3.14 | -2.71 |
| 735 | Cc1cncnc1                               | C00967366 | -16.84 | -1.42 | -15.95 | 2.96 | -2.42 |
| 736 | c1ccc(cc1)CC(=O)[S-]                    | C02041149 | -16.84 | -2.46 | -17.74 | 3.85 | -0.5  |
| 737 | CCOCc1cn[nH]n1                          | C05502177 | -16.84 | -3.4  | -16.65 | 3.56 | -0.35 |
| 738 | c1(nc(nc1)C(=O)N)N                      | C17353821 | -16.84 | -7.68 | -16.91 | 7.92 | -0.17 |
| 739 | c1cc(c(cc1C(=O)N=C=S)F)F                | C21968391 | -16.84 | 1.59  | -19.71 | 4.48 | -3.19 |
| 740 | c1ccc(c(c1)NN)F                         | C00153109 | -16.83 | -0.36 | -17.67 | 2.86 | -1.67 |
| 741 | c1c(ncc(n1)Br)N                         | C01420726 | -16.83 | -3.77 | -16.95 | 4.09 | -0.2  |
| 742 | c1c(c(cc(c1F)F)F)CC#N                   | C04290231 | -16.83 | -1.67 | -18.43 | 7.07 | -3.8  |
| 743 | c1cc(ncc1F)NN=O                         | C06536603 | -16.83 | -3.61 | -18.65 | 5.17 | 0.25  |
| 744 | c1(nc(nc(n1)F)F)F                       | C01669280 | -16.82 | 0.15  | -15.79 | 0.5  | -1.69 |
| 745 | c1cc([nH]c1)CCC#N                       | C01868300 | -16.82 | -2.03 | -17.33 | 5.81 | -3.26 |
| 746 | c1ccc(cc1)CS                            | C03873647 | -16.82 | -0.88 | -17.38 | 1.8  | -0.35 |
| 747 | c1c(cnc(c1)F)C#N                        | C12471972 | -16.82 | 0.03  | -17.91 | 3.46 | -2.41 |
| 748 | c1cnc(nc1)NC#N                          | C13638829 | -16.82 | -2.28 | -15.83 | 6.16 | -4.87 |
| 749 | c1cncnc1/C(=N/O)/N                      | C15828512 | -16.82 | -5.35 | -16.67 | 4.63 | 0.57  |
| 750 | c1c(ncc(n1)Br)Cl                        | C30678093 | -16.82 | -1.75 | -15.71 | 2.22 | -1.58 |
| 751 | c1c(c[nH]1)[N+](=O)[O-]                 | C01049761 | -16.81 | -4.24 | -17.65 | 6.4  | -1.32 |
| 752 | COC1C=CC=CC=C1                          | C01710633 | -16.81 | 1.09  | -16.7  | 2.06 | -3.27 |
| 753 | c1c(c(n2c(n1)ncn2)N)C#N                 | C04342642 | -16.81 | -1.77 | -18.74 | 7.27 | -3.56 |
| 754 | Cc1csc(n1)NN=O                          | C06523538 | -16.81 | -4.33 | -14.63 | 3.28 | -1.13 |
| 755 | c1cc(nnc1C#N)Cl                         | C21299079 | -16.81 | -1.96 | -19.04 | 6.08 | -1.89 |
| 756 | c1c(c(c(cn1)F)Br)F                      | C30678558 | -16.81 | 0.2   | -16.57 | 2.03 | -2.47 |
| 757 | c1cc(sc1)CCO                            | C00391955 | -16.8  | -2.65 | -15.67 | 2.7  | -1.19 |
| 758 | C=CCC1C=CC(=O)C=C1                      | C01565456 | -16.8  | -0.36 | -18.94 | 2.7  | -0.2  |
| 759 | c1c(cnc(n1)N)N                          | C01590037 | -16.8  | -3.93 | -17.67 | 4.7  | 0.11  |
| 760 | c1c(cnc(c1O)Cl)F                        | C02384091 | -16.8  | -1.5  | -18.17 | 3.3  | -0.43 |
| 761 | c1c(cnc(c1)C#N                          | C02524724 | -16.8  | -0.69 | -16.58 | 3.22 | -2.74 |
| 762 | c1(c(noc1[N+](=O)[O-])[O-])[N+](=O)[O-] | C04565377 | -16.8  | -4.64 | -16.41 | 3.43 | 0.82  |
| 763 | c1c(sc(n1)N)SC#N                        | C08294946 | -16.8  | -2.49 | -18.33 | 5.3  | -1.28 |
| 764 | c1cc2nccn2c(c1)F                        | C14982821 | -16.8  | -2.78 | -16.17 | 5.79 | -3.64 |
| 765 | Cc1cccn1                                | C00967365 | -16.79 | -1.38 | -16    | 3.14 | -2.55 |
| 766 | C=C(CSC#N)Br                            | C01674057 | -16.79 | -1.15 | -16.16 | 3.69 | -3.17 |
| 767 | c1cncc(c1Br)F                           | C02598039 | -16.79 | -0.65 | -16.33 | 2.61 | -2.42 |
| 768 | C1C=CC(=C1)CC#N                         | C12358645 | -16.79 | -1.33 | -16.76 | 5.17 | -3.86 |
| 769 | c1cc(c(cc1C#N)N)F                       | C14989290 | -16.79 | -0.9  | -17.43 | 3.69 | -2.15 |
| 770 | c1c(c(nc(=S)[nH]1)N)[N+](=O)[O-]        | C17289250 | -16.79 | -3.52 | -15.36 | 3.16 | -1.07 |
| 771 | Cc1cncnc1[S-]                           | C26438568 | -16.79 | -1.63 | -14.49 | 1.82 | -2.49 |
| 772 | c1ccc(cc1)COC(=S)S                      | C01562479 | -16.78 | -2.91 | -19.55 | 4.71 | 0.96  |
| 773 | C#Cc1ccccc1                             | C01680639 | -16.78 | -0.1  | -17.62 | 2.96 | -2.03 |
| 774 | c1cnc(c1C(F)(F)F)F                      | C02511158 | -16.78 | -0.25 | -16.86 | 3.17 | -2.84 |
| 775 | c1c(cc(c(c1F)CO)F)F                     | C04290165 | -16.78 | -0.3  | -17.91 | 2.79 | -1.36 |
| 776 | c1c(nc([nH]1)Br)Br                      | C15020990 | -16.78 | -3.82 | -15.6  | 4.61 | -1.98 |
| 777 | c1cc2c(cc1Cl)onc2[O-]                   | C15923721 | -16.78 | -4.35 | -14.94 | 4.24 | -1.72 |
| 778 | c1cncnc1Br                              | C26439052 | -16.78 | -1.37 | -17.71 | 3.96 | -1.66 |
| 779 | c1cc(c(cc1Cl)N)Cl                       | C00154585 | -16.77 | -3.33 | -12.44 | 1.54 | -2.54 |
| 780 | c1cc(c(cc1N)F)F                         | C00388528 | -16.77 | -3.63 | -15.33 | 4    | -1.82 |
| 781 | c1c[nH]c2c1cnc2                         | C02040901 | -16.77 | -1.57 | -18.1  | 5.02 | -2.12 |
| 782 | CC#CCOC(=O)Cl                           | C02564822 | -16.77 | 0.16  | -17.77 | 2.9  | -2.05 |
| 783 | c1c2c([nH]n1)CSC2                       | C03848620 | -16.77 | -3.12 | -17.49 | 5.77 | -1.93 |
| 784 | CNc1ccc(cc1F)F                          | C00167002 | -16.76 | -0.66 | -16.06 | 2.59 | -2.64 |
| 785 | c1cc(cc(c1)F)CN=C=O                     | C02389319 | -16.76 | -2    | -16.65 | 3.6  | -1.71 |
| 786 | c1cc(oc1C=O)C(F)(F)F                    | C05177782 | -16.76 | -3.64 | -13.64 | 3.55 | -3.04 |
| 787 | CSc1ncc(cn1)F                           | C30677905 | -16.76 | 0.45  | -17.88 | 3.2  | -2.54 |
| 788 | c1cc(ncc1C#N)C(F)(F)F                   | C00154407 | -16.75 | -1.19 | -17.3  | 4.9  | -3.16 |
| 789 | c1c2c(nc[nH]2)ncn1                      | C00391913 | -16.75 | -2.83 | -18.73 | 7.36 | -2.56 |
| 790 | c1c(cn(c1C#N)O)Cl                       | C01764092 | -16.75 | -2.81 | -16.96 | 4.71 | -1.68 |
| 791 | c1ccn(c1)CCO                            | C02556833 | -16.75 | -2.62 | -16.26 | 3.22 | -1.09 |
| 792 | c1ccc(c1)C(=O)Cl                        | C02582853 | -16.75 | -1.11 | -17.24 | 3.73 | -2.14 |
| 793 | C=C/c1cncn1                             | C15776679 | -16.75 | -3.45 | -15.1  | 6    | -4.2  |
| 794 | c1ccc2c(c1)cco2                         | C01591814 | -16.74 | -1.86 | -15.34 | 4.05 | -3.6  |
| 795 | c1c[nH]c2c1cnc2                         | C02040902 | -16.74 | -1.5  | -18.15 | 5.04 | -2.14 |
| 796 | CCc1cncnc1                              | C08294967 | -16.74 | -1.22 | -14.56 | 2.69 | -3.65 |
| 797 | c1cc([nH+]cc1N)N                        | C19015166 | -16.74 | -3.36 | -17.64 | 3.8  | 0.46  |
| 798 | c1cnn(c1)CCCl                           | C01393361 | -16.73 | -1.58 | -15.84 | 3.59 | -2.89 |
| 799 | c1c(c(c(cn1)F)N)F                       | C02386531 | -16.73 | -2.31 | -16.1  | 2.26 | -0.58 |
| 800 | c1c2c([nH]pn2)ncn1                      | C05567619 | -16.73 | -1.31 | -18.4  | 3.41 | -0.43 |
| 801 | CNC(=O)Oc1ccc(cc1)F                     | C00399265 | -16.72 | -0.33 | -21.71 | 5.66 | -0.34 |
| 802 | C/C=C/Cl)SC#N                           | C01673783 | -16.72 | -0.99 | -16.12 | 3.54 | -3.15 |
| 803 | c1c(c(c(c(c1F)F)N)N                     | C02574886 | -16.72 | -5    | -16.27 | 5.02 | -0.47 |
| 804 | c1cc(sc1)CSC(=[NH2+])N                  | C17289425 | -16.72 | -1.11 | -16.59 | 2.95 | -1.97 |
| 805 | CC(=O)N/C(=N/[N+](=O)[O-])/N            | C06562790 | -16.71 | -5.26 | -17.11 | 3.74 | 1.91  |
| 806 | Cc1ccc(c(c1)N)N                         | C00331686 | -16.7  | -4.01 | -14.46 | 2.56 | -0.8  |



|     |                                  |           |        |       |        |      |       |
|-----|----------------------------------|-----------|--------|-------|--------|------|-------|
| 807 | c1ccc(cc1)COC(=O)C(=O)N          | C01707303 | -16.7  | -2.21 | -18.48 | 5.97 | -1.98 |
| 808 | c1c2cn[nH]c2ncc1Br               | C02547938 | -16.7  | -0.73 | -18.09 | 4.41 | -2.29 |
| 809 | c1cc2c(c(c1)F)non2               | C02576406 | -16.7  | -2.67 | -17.79 | 5.62 | -1.87 |
| 810 | C1c2c(noc2N)CS1                  | C07951901 | -16.7  | -3.91 | -17.11 | 4.77 | -0.44 |
| 811 | c1cncnc1Cl                       | C20358090 | -16.7  | -1.24 | -16.76 | 3.5  | -2.2  |
| 812 | c1cc(cc1N=C=O)ClF                | C00164881 | -16.69 | -2.2  | -15.29 | 2.06 | -1.27 |
| 813 | c1cc(sc1C(F)F)Br                 | C15442476 | -16.69 | -1.18 | -12.58 | 1.09 | -4.02 |
| 814 | c1cc(oc1)CC(=O)ON=O              | C20231630 | -16.69 | 2.9   | -22.99 | 7.09 | -3.68 |
| 815 | c2cc1ccccc1o2                    | M1995A029 | -16.69 | -1.63 | -15.52 | 4.06 | -3.6  |
| 816 | c1c(cc(c(c1F)C#N)F)F             | C00164883 | -16.68 | 1.49  | -18.6  | 3.93 | -3.5  |
| 817 | c1cn2cncc2cn1                    | C01601710 | -16.68 | -2.75 | -18.96 | 5.7  | -0.67 |
| 818 | CCOC(=O)C(=C)F                   | C02525415 | -16.68 | -0.76 | -16.61 | 3.47 | -2.78 |
| 819 | c1c(c(nc(n1)Cl)N)Br              | C04198794 | -16.68 | -4.16 | -13.98 | 2.86 | -1.39 |
| 820 | CCOc1nc(c(nn1)F)[O-]             | C04522035 | -16.68 | -3.2  | -18.91 | 4.22 | 1.21  |
| 821 | Cc1c2c(c[nH]2)n[nH]1             | C13119669 | -16.68 | -2.21 | -19.2  | 5.09 | -0.35 |
| 822 | CC(=O)c1c[nH]cn1                 | C16696762 | -16.68 | -4.99 | -16.41 | 6.78 | -2.06 |
| 823 | CC(=O)Oc1ccc2c(c1)nsn2           | C00258314 | -16.67 | -2.61 | -17.8  | 6.57 | -2.84 |
| 824 | CNC(=O)Oc1ccccc1N                | C01716745 | -16.67 | -1.27 | -21.75 | 6.86 | -0.52 |
| 825 | c1ccccc1Br                       | C02141003 | -16.67 | -1.95 | -14.66 | 2.27 | -2.32 |
| 826 | c12c(nc(c(n1)NO)[O-])non2        | C05753647 | -16.67 | -1.09 | -21.34 | 5.3  | 0.46  |
| 827 | c1ccc(cc1)/C(=[NH+])N)/N         | C15889049 | -16.67 | -1.18 | -17.95 | 4.03 | -1.56 |
| 828 | c1c(c(sc1Cl)C#N)N                | C16696879 | -16.67 | -2.92 | -15.28 | 3.33 | -1.8  |
| 829 | c1cc(oc1)CN=C=O                  | C02390452 | -16.66 | -1.68 | -18.54 | 3.91 | -0.35 |
| 830 | C(=O)(C(F)F)NOC(=O)C(F)F         | C04240915 | -16.66 | -0.88 | -16.04 | 3.06 | -2.81 |
| 831 | c1cc(cnc1)/C=C/C=O               | C04773466 | -16.66 | -1.94 | -18.04 | 5.95 | -2.63 |
| 832 | c1cc(ncc1Cl)C(F)F                | C15440742 | -16.66 | -0.95 | -15.3  | 2.9  | -3.32 |
| 833 | c1csc(n1)N=C=O                   | C22001992 | -16.66 | -0.84 | -17.91 | 2.92 | -0.82 |
| 834 | c1ccc(cc1)CNC=O                  | C01733926 | -16.65 | 0.66  | -21.07 | 5.81 | -2.05 |
| 835 | C=CCNc1ccccc1F                   | C19737073 | -16.65 | -2.06 | -13.22 | 2.32 | -3.69 |
| 836 | Cc1ccccc1F                       | C02599054 | -16.64 | -1.82 | -15.36 | 2.98 | -2.43 |
| 837 | c1cc(c(c(c1)F)N)O                | C16158906 | -16.64 | -3.51 | -16.67 | 3.32 | 0.22  |
| 838 | c1c(c(c(c(n1)F)F)Br)F            | C16159837 | -16.64 | -0.08 | -16.26 | 2.1  | -2.41 |
| 839 | COC(=O)c1c(non1)N                | C02473576 | -16.63 | -1.36 | -17.7  | 3.24 | -0.81 |
| 840 | c1c([nH]nc1C(F)F)C2CC2           | C04243650 | -16.63 | -3.23 | -14.78 | 4.52 | -3.15 |
| 841 | c1c(c(c(cn1)Cl)Cl)F              | C14982617 | -16.63 | -1.09 | -14.51 | 1.75 | -2.78 |
| 842 | COc1ccccc1                       | C00403175 | -16.62 | -1.92 | -16.79 | 3.62 | -1.52 |
| 843 | C=COCCOC=C                       | C05157944 | -16.62 | -1.06 | -16.09 | 2.65 | -2.12 |
| 844 | c1cc2cnccn2c1                    | C05771137 | -16.62 | -2.15 | -17.86 | 4.34 | -0.96 |
| 845 | c1ccc(c(c1)N=[N+]=[N-])F         | C12505595 | -16.62 | 0.43  | -18.27 | 2.92 | -1.69 |
| 846 | c1cc2c(cc1Br)non2                | C00158675 | -16.61 | -2.54 | -16.13 | 2.74 | -0.68 |
| 847 | Cn1ccccc1                        | C01692446 | -16.61 | -1.69 | -14.85 | 2.92 | -3    |
| 848 | CSc1ccc(cc1F)F                   | C02511091 | -16.61 | -0.15 | -18.01 | 3.3  | -1.75 |
| 849 | c1c(c(nc(c1F)F)F)C#N             | C02540462 | -16.61 | 1.32  | -19.64 | 3.95 | -2.25 |
| 850 | c1cc2c(ccc2)cc1N=C=O             | C02548443 | -16.61 | -2.12 | -16    | 3.61 | -2.09 |
| 851 | c1c2c([nH]n1)CCCC2               | C08078164 | -16.61 | -3.19 | -15.37 | 4.49 | -2.53 |
| 852 | c1cc(ncc1F)N                     | C19735097 | -16.61 | -3.14 | -16.62 | 4.29 | -1.14 |
| 853 | c1ccc(c(c1)N)Sc2[nH]ncn2         | C19845536 | -16.61 | -2.98 | -16.68 | 5.84 | -2.81 |
| 854 | c1c(c(c(cn1)Cl)F)Cl              | C26893241 | -16.61 | -0.77 | -14.83 | 1.85 | -2.86 |
| 855 | Cc1c(cncn1)N                     | C01562392 | -16.6  | -3.77 | -16.55 | 4.56 | -0.83 |
| 856 | CC(C=O)ON[N+](=O)[O-]            | C01732519 | -16.6  | -2.26 | -15.63 | 4.41 | -3.12 |
| 857 | c1cc(oc1)CNC(=O)C(=O)N           | C03072973 | -16.6  | -3.58 | -21.22 | 5.64 | 2.57  |
| 858 | c1c(sc(n1)N)Br                   | C04624087 | -16.6  | -4.47 | -16.97 | 3.04 | 1.79  |
| 859 | C#CCSc1[nH]ncn1                  | C14608578 | -16.6  | -1.12 | -18.9  | 7.12 | -3.69 |
| 860 | c1cc2cn[nH]c2c(c1)F              | C14985760 | -16.6  | -1.86 | -17.21 | 4.86 | -2.39 |
| 861 | c1csc(n1)N/C=N/O                 | C15934906 | -16.6  | -2.63 | -18.66 | 5.81 | -1.12 |
| 862 | c1cc(c(c(c1CC=O)F)F)F            | C21984093 | -16.6  | -3.5  | -14.87 | 5.57 | -3.8  |
| 863 | CNc1ccccc1                       | M2007002_ | -16.6  | -1.98 | -14.07 | 2.02 | -2.58 |
| 864 | CC(=O)Oc1ccc(nc1)Cl              | C00335980 | -16.59 | -0.55 | -18.39 | 5.74 | -3.39 |
| 865 | CNc1ccccc1                       | C00901343 | -16.59 | -2.03 | -14    | 2.01 | -2.57 |
| 866 | C1C=NN=C1Br                      | C00967346 | -16.59 | -2.03 | -16.01 | 2.62 | -1.16 |
| 867 | c1ccc2c(c1)cno2                  | C04521187 | -16.59 | -2.47 | -17.42 | 6.19 | -2.9  |
| 868 | CNc1ccccc1                       | C05141034 | -16.59 | -2.41 | -16.48 | 3.55 | -1.25 |
| 869 | c1cc(cc(c1)F)C(=O)N=C=O          | C19408029 | -16.59 | 1.27  | -19.91 | 3.23 | -1.17 |
| 870 | c1ccc(c(c1)N)O                   | C00157526 | -16.58 | -2.98 | -16.88 | 3.01 | 0.27  |
| 871 | Cc1cc(n[nH]1)C#N                 | C32005330 | -16.58 | -3.31 | -16.32 | 4.63 | -1.58 |
| 872 | c1cnc(nc1Cl)N                    | C00967348 | -16.57 | -2.59 | -16.07 | 4.02 | -1.93 |
| 873 | c1ccc(cc1)C(=O)F                 | C01847403 | -16.57 | -2.18 | -14.91 | 3.71 | -3.19 |
| 874 | C=COCC(=O)C(F)F                  | C02242722 | -16.57 | -0.4  | -15.32 | 1.88 | -2.72 |
| 875 | c1([nH]nnn1)/N=N/c2[nH]nnn2      | C06862759 | -16.57 | -0.62 | -21.58 | 6.92 | -1.29 |
| 876 | Cc1ccc(nc1)N[N+](=O)[O-]         | C13214339 | -16.57 | -1.53 | -18.76 | 7.19 | -3.47 |
| 877 | C1CS/C(=N)C#N)N1                 | C14982514 | -16.57 | -1.72 | -16.23 | 4.33 | -2.96 |
| 878 | c1c(c(c(cn1)F)F)F                | C14983676 | -16.57 | -0.43 | -16.51 | 2.57 | -2.2  |
| 879 | c1cc(cc(c1O)F)F                  | C00164811 | -16.56 | -3.39 | -15.74 | 3.86 | -1.29 |
| 880 | c1cc(cc(c1)F)O                   | C00164911 | -16.56 | -2.88 | -15.57 | 3.16 | -1.27 |
| 881 | c1nnc2n1[C@@H](N=N2)[N+](=O)[O-] | C04343691 | -16.56 | -1.47 | -18.2  | 6.86 | -3.74 |
| 882 | Cc1cnc(s1)N                      | C08652421 | -16.56 | -3.57 | -15.21 | 3.83 | -1.62 |
| 883 | c1cc2nccn2cc1F                   | C18555974 | -16.56 | -2.66 | -15.08 | 4.9  | -3.71 |
| 884 | c1cc([nH+]c(c1)N)N               | C19075726 | -16.56 | -3.73 | -16.51 | 3.79 | -0.11 |
| 885 | c1cc(nnc1Cl)Cl                   | C01685243 | -16.55 | -2.08 | -16.92 | 4.45 | -2.01 |
| 886 | CSc1ccccc1O                      | C01701825 | -16.55 | -0.51 | -17.81 | 3.79 | -2.02 |
| 887 | c1cnc(cn1)I                      | C02245235 | -16.55 | -1.21 | -17.47 | 3.47 | -1.35 |
| 888 | c1ccc(cc1)[C@@H](CC)O            | C02555240 | -16.55 | -0.77 | -16.2  | 3.06 | -2.64 |
| 889 | c1c(c(nc(n1)NN)N)F               | C09189735 | -16.55 | -3.3  | -16.97 | 4.26 | -0.54 |
| 890 | c2cc1ccccc1[nH]2                 | M1995A031 | -16.55 | -1.24 | -15.83 | 3.87 | -3.35 |
| 891 | Cn1ccccc1                        | M2007003_ | -16.55 | -1.7  | -14.78 | 2.92 | -2.99 |
| 892 | c1cc(c(cc1Cl)N)C#N               | C00395567 | -16.54 | -2.71 | -14.68 | 3.25 | -2.39 |
| 893 | C1C/C(=C/[O-])C(=O)C1            | C01235150 | -16.54 | -5.22 | -14.9  | 5.44 | -1.86 |
| 894 | c1cc(ccc1N)Br)N                  | C01438949 | -16.54 | -3.57 | -14.63 | 2.4  | -0.73 |
| 895 | c1ccc(cc1)CC=O                   | C01699889 | -16.54 | -2.28 | -15.28 | 5.3  | -4.29 |
| 896 | c1ccc(cc1)C(=O)N=C=O             | C01766603 | -16.54 | 1.65  | -20.65 | 3.56 | -1.11 |

|     |                                       |           |        |       |        |      |       |
|-----|---------------------------------------|-----------|--------|-------|--------|------|-------|
| 897 | C=CCSCC=C                             | M1995A014 | -16.54 | -0.44 | -13.46 | 1.41 | -4.05 |
| 898 | c2ccc1oncc1c2                         | isooxzl   | -16.54 | -2.5  | -17.34 | 6.19 | -2.9  |
| 899 | c1cc(c(cc1F)F)NC=O                    | C00399097 | -16.53 | -0.13 | -20.31 | 5.36 | -1.45 |
| 900 | CCO[P@](=O)(O)[S-]                    | C02017442 | -16.53 | -1.72 | -13.21 | 5.42 | -7.02 |
| 901 | c1cc(c(c(c1F)N)C#N                    | C16159792 | -16.53 | -1.61 | -16.67 | 3.84 | -2.09 |
| 902 | c1cc(ccc1N)Oc2nccs2                   | C16677891 | -16.53 | -0.8  | -18.87 | 5.02 | -1.88 |
| 903 | c1noc2ccccc12                         | M1995A018 | -16.53 | -2.43 | -17.4  | 6.19 | -2.89 |
| 904 | c1cc(cnc1)C=O                         | C00158588 | -16.52 | -2.05 | -17.95 | 5.3  | -1.81 |
| 905 | c1cnc(cc1Br)F                         | C02526716 | -16.52 | -1.23 | -15.92 | 3    | -2.36 |
| 906 | c1ccc2c(c1)cc[nH]2                    | C14516984 | -16.52 | -1.24 | -15.79 | 3.87 | -3.35 |
| 907 | c1(c(c(c(c1F)F)C)F)F                  | L200A002_ | -16.52 | 0.53  | -13.58 | 0.5  | -3.96 |
| 908 | c1cc(ccc1CO)F                         | C00157464 | -16.51 | -1.29 | -17.47 | 3.55 | -1.31 |
| 909 | c1csc2c1nn(c2)N                       | C00334093 | -16.51 | -4.14 | -18.15 | 7.09 | -1.31 |
| 910 | c1cc(cc(c1)F)C#N                      | C00407069 | -16.51 | 0.41  | -17.33 | 4.05 | -3.64 |
| 911 | CSc1nc(sn1)N                          | C08652418 | -16.51 | -3.44 | -16.03 | 4.11 | -1.14 |
| 912 | [H]/N=C(N)/N1CCCC1=O                  | C22521270 | -16.51 | -3.1  | -17.61 | 5.73 | -1.53 |
| 913 | c1cncoc1C(F)F                         | C00166563 | -16.5  | 0.24  | -16.57 | 2.65 | -2.81 |
| 914 | c1c(cc(c(c1O)N)F)F                    | C02243350 | -16.5  | -2.58 | -17.06 | 2.97 | 0.17  |
| 915 | CCc1ccc[nH]1                          | C02528141 | -16.5  | -1.3  | -14.83 | 2.5  | -2.87 |
| 916 | c1c2c(nc(n1)[S-])n[nH]n2              | C05763113 | -16.5  | -3.96 | -16.83 | 6.13 | -0.3  |
| 917 | c1cncoc1CF                            | C15042152 | -16.5  | -2.05 | -15.73 | 3.79 | -2.51 |
| 918 | c1cc(c(c1F)OCC#N)F                    | C15442721 | -16.5  | 0.17  | -19.93 | 6.87 | -3.62 |
| 919 | Cc1ccc(c(c1)N)F                       | C00388035 | -16.49 | -2.3  | -14.32 | 2.5  | -2.36 |
| 920 | c1c[nH]nc1                            | C01027316 | -16.49 | -3.93 | -16.17 | 5.16 | -1.55 |
| 921 | c1ccc(cc1)C[C@H]2CO2                  | C01673126 | -16.49 | -1.62 | -15.38 | 3.72 | -3.22 |
| 922 | c1(nc([nH]n1)N)C(=O)NN                | C16971468 | -16.49 | -7.59 | -16.64 | 6.47 | 1.27  |
| 923 | c1c(ncn1)CC)Br                        | C02569104 | -16.48 | -2.68 | -14.92 | 4.02 | -2.9  |
| 924 | c1cc(c(cc1F)Br)N                      | C00159787 | -16.47 | -2.84 | -16.56 | 2.39 | 0.53  |
| 925 | c1cc(cnc1)CC#N                        | C00391916 | -16.47 | -1.35 | -19.65 | 7.42 | -2.9  |
| 926 | C(C)N(C#N)N=O                         | C05495985 | -16.47 | 0.92  | -17.49 | 2.75 | -2.64 |
| 927 | c1c(cnc(c1F)NN)F                      | C16158485 | -16.47 | -2.09 | -16.14 | 2.9  | -1.14 |
| 928 | C=CCNc1nnns1                          | C32603397 | -16.47 | -1.48 | -19.39 | 5.63 | -1.23 |
| 929 | c1cc(c(cc1F)O)F                       | C00409280 | -16.46 | -1.67 | -16.52 | 3.07 | -1.34 |
| 930 | Cc1c(ncn1)N                           | C01731583 | -16.46 | -3.64 | -16.98 | 4.46 | -0.3  |
| 931 | c1ccc(cc1)P2(=O)OCCO2                 | C01737302 | -16.46 | -10.3 | -6.71  | 1.7  | -1.15 |
| 932 | c1ccc(cc1)C(=O)Cl                     | C02041164 | -16.46 | -0.44 | -15.82 | 3.36 | -3.55 |
| 933 | c1cc(c(cc1C#N)F)Cl                    | C02512522 | -16.46 | -1.56 | -16.31 | 3.79 | -2.38 |
| 934 | CSc1cccs1                             | S2001A003 | -16.46 | -0.64 | -14.48 | 2.16 | -3.5  |
| 935 | c1c(c(ncn1)N)N                        | C00967391 | -16.45 | -4.9  | -16.63 | 4.7  | 0.38  |
| 936 | c1cc(oc1)CCL                          | C01587710 | -16.45 | -0.77 | -15.72 | 2.99 | -2.95 |
| 937 | Cc1ccncc1                             | C02026722 | -16.45 | -1.94 | -16.07 | 3.91 | -2.35 |
| 938 | c1cnc(cn1)[C][NH+]=[N+]=[N-]          | C05045522 | -16.45 | -1.2  | -20.97 | 4.75 | 0.97  |
| 939 | c1c(c(oc1[N+](=O)[O-])N)N[N+](=O)[O-] | C05641452 | -16.45 | -5.16 | -17.14 | 5.36 | 0.48  |
| 940 | C/C(=C/C(=O)C(F)F)/[O-]               | C12358633 | -16.45 | -3.24 | -14.3  | 3.16 | -2.07 |
| 941 | c1(c(ncn1)N)C(=N/O)/Cl                | C13844192 | -16.45 | -3.47 | -18.18 | 4.07 | 1.13  |
| 942 | c1cc(cnc1)CF                          | C15042156 | -16.45 | -1.64 | -15.96 | 3.79 | -2.65 |
| 943 | CCc1cccnc1F                           | C21981766 | -16.45 | -1.03 | -17.06 | 4.67 | -3.02 |
| 944 | c1ccc(c(c1)N)Br                       | C00404305 | -16.44 | -2.6  | -16.88 | 1.97 | 1.08  |
| 945 | c1cc2cn[nH]c2nc1                      | C03852638 | -16.44 | -1.42 | -19.02 | 5.81 | -1.82 |
| 946 | c1cc(c(cc1F)N+)(=O)[O-]N              | C04261952 | -16.44 | -2.29 | -17.09 | 5.41 | -2.47 |
| 947 | c1cnc(c1)Br                           | C00158586 | -16.43 | -0.66 | -17.02 | 3.73 | -2.49 |
| 948 | c1cc(ccc1N=C=S)F                      | C00167224 | -16.43 | 0.89  | -15.43 | 2.1  | -4    |
| 949 | c1c(c(nc(c1F)F)F)F                    | C00409383 | -16.43 | 0.66  | -17.58 | 2.53 | -2.05 |
| 950 | COC(=O)c1c(ncn1)[N+](=O)[O-]          | C01295934 | -16.43 | -0.37 | -15.87 | 2.88 | -3.08 |
| 951 | c1cc(c(c1F)NN)F                       | C02243111 | -16.43 | -0.51 | -17.66 | 3.34 | -1.61 |
| 952 | c1(ncn1N)[S-]C(F)F                    | C04237615 | -16.43 | -4.13 | -15.43 | 4.66 | -1.53 |
| 953 | Cc1c(cccn1)F                          | C14982837 | -16.43 | -0.16 | -16.75 | 3.07 | -2.59 |
| 954 | c1c(n[nH]c1C2CC2)C#N                  | C32005406 | -16.43 | -4.17 | -14.1  | 4.6  | -2.75 |
| 955 | c1ccc(c(c1)F)F                        | C00164418 | -16.42 | -1.62 | -15.03 | 3.63 | -3.4  |
| 956 | c1cc(c(nc1)F)C(F)F                    | C02540646 | -16.42 | -3.35 | -15.99 | 5.24 | -2.32 |
| 957 | C(=O)(C(F)F)C(F)F)Cl                  | C03875510 | -16.42 | 0.27  | -14.73 | 0.51 | -2.47 |
| 958 | c1cc(cnc1)C(=O)N=[N+]=[N-]            | C15784782 | -16.42 | 1.5   | -22.54 | 3.81 | 0.81  |
| 959 | c1c(cnc(n1)C#N)Cl                     | C00336445 | -16.41 | 0.51  | -18.84 | 3.99 | -2.07 |
| 960 | c1(c(c(nc(c1F)F)F)F)N                 | C01085205 | -16.41 | -3.56 | -15.01 | 2.6  | -0.44 |
| 961 | CCc1ccc(cc1)O                         | C01690956 | -16.41 | -0.82 | -15.99 | 2.63 | -2.23 |
| 962 | c1ccc2c(c1)N2                         | C20230945 | -16.41 | -3.81 | -15.41 | 4.93 | -2.12 |
| 963 | C=Cc1ccc(cc1)N                        | C01673648 | -16.4  | -0.75 | -15.31 | 2.22 | -2.56 |
| 964 | c1ccc(cc1)OCCC#N                      | C01700385 | -16.4  | -1.85 | -15.84 | 5.33 | -4.04 |
| 965 | c1cn2c(cn1)nnn2                       | C01701960 | -16.4  | -3.19 | -20.01 | 7.44 | -0.63 |
| 966 | CC(=C)OC(=O)Cl                        | C02384739 | -16.4  | -0.76 | -15.67 | 2.21 | -2.17 |
| 967 | c1cc(c(c(c1)F)F)CS                    | C04244660 | -16.4  | -1.06 | -15.51 | 4.26 | -4.09 |
| 968 | c1cc(cnc1)/C=N/O                      | C04758522 | -16.4  | -3.9  | -18.85 | 6.6  | -0.26 |
| 969 | c1ccc(cc1)CNC(=S)N                    | C05850155 | -16.4  | -1.4  | -21.51 | 3.62 | 2.88  |
| 970 | Cc1ncc(cn1)C#N                        | C14593177 | -16.4  | -0.74 | -17.44 | 4.05 | -2.27 |
| 971 | c1cc(cnc1)/C=N/O                      | C19730699 | -16.4  | -1.55 | -19    | 4.56 | -0.41 |
| 972 | c1cc(oc1)CS                           | C00388704 | -16.39 | -1    | -15.68 | 2.89 | -2.6  |
| 973 | c1cc2c([nH]c(=S)[nH]2)nc1             | C04786354 | -16.39 | -2.3  | -17.79 | 5.78 | -2.08 |
| 974 | C(=C(C(F)F)F)(O-))C(=O)C(F)F          | C12410248 | -16.39 | 0.72  | -18.95 | 4.3  | -2.47 |
| 975 | c1nnc(n1N)SCC#N                       | C22201976 | -16.39 | -3.19 | -19.31 | 8.91 | -2.79 |
| 976 | c1csc2n1cc(n2)Cl                      | C00124263 | -16.38 | -1.34 | -18.19 | 6.77 | -3.62 |
| 977 | c1ccc2c(c1)CC2=O                      | C01728837 | -16.38 | -1.9  | -15.49 | 4.63 | -3.62 |
| 978 | #CCn1cnc(c1Cl)Cl                      | C02543584 | -16.38 | -2.41 | -15.12 | 5.83 | -4.67 |
| 979 | Cc1ccc(cc1O)F                         | C02568100 | -16.38 | -1.18 | -16.35 | 3.07 | -1.92 |
| 980 | c1cnc(cc1F)F                          | C02599002 | -16.38 | -1.8  | -15.6  | 3.07 | -2.05 |
| 981 | c1cc(ccc1CNC=O)F                      | C03097781 | -16.38 | 0.16  | -20.68 | 6.22 | -2.08 |
| 982 | C[C@H](c1ccc(cc1F)F)O                 | C12506480 | -16.38 | -1.18 | -15.62 | 2.67 | -2.24 |
| 983 | c1cc(c(cc1F)F)C(=O)N=C=S              | C21964249 | -16.38 | 2.86  | -21.23 | 5.2  | -3.21 |
| 984 | c1cc(ccc1C#N)Cl                       | C00157255 | -16.37 | -0.71 | -17.09 | 3.27 | -1.84 |
| 985 | C[C@H](c1ccccc1)O                     | C00896626 | -16.37 | -0.98 | -15.75 | 2.47 | -2.1  |
| 986 | COC(=O)C(C(C(F)F)F)F                  | C01847517 | -16.37 | 1.4   | -14.82 | 2.05 | -5.01 |

|      |                                        |           |        |       |        |       |       |
|------|----------------------------------------|-----------|--------|-------|--------|-------|-------|
| 987  | c1cc2c(nc1)nc[nH]2                     | C04003201 | -16.37 | -2.95 | -17.9  | 7.21  | -2.72 |
| 988  | c1c(c(cc1F)F)O                         | C04262384 | -16.37 | -1.94 | -16.37 | 3.02  | -1.07 |
| 989  | c1ccc(cc1)NC(=O)Cl                     | C06864539 | -16.37 | -0.45 | -20.28 | 4.21  | 0.15  |
| 990  | c1cc(cc1)F)CSC(=NH2+)N                 | C07715600 | -16.37 | -1.65 | -15.46 | 3.41  | -2.68 |
| 991  | c1cnc(c1)Br                            | C08698473 | -16.37 | -2.67 | -16.1  | 3.62  | -1.22 |
| 992  | c1cc(ncc1Cl)NN                         | C08729997 | -16.37 | -4.36 | -14.54 | 3.82  | -1.29 |
| 993  | c1c2c(ncnc2[nH]n1)N                    | C13542589 | -16.37 | -4.7  | -17.08 | 6.27  | -0.85 |
| 994  | c1csc(n1)CN=C=O                        | C22861654 | -16.37 | -2.44 | -18.81 | 4.49  | 0.4   |
| 995  | c1ccc(cc1)OC(=O)NN                     | C00079243 | -16.36 | 0.22  | -22.46 | 6.67  | -0.8  |
| 996  | c1c(ccc1Cl)Cl                          | C00404352 | -16.36 | -0.35 | -14.59 | 1.36  | -2.79 |
| 997  | c1nnc(n1)N                             | C01685262 | -16.36 | -2.15 | -15.73 | 4.1   | -2.58 |
| 998  | CCc1ccccc1O                            | C01706027 | -16.36 | -1    | -15.56 | 2.61  | -2.41 |
| 999  | c1cc(sc1)N                             | C01708748 | -16.36 | -2.92 | -14.41 | 2.11  | -1.15 |
| 1000 | c1c(c(n[nH]1)[N+](=O)[O-])[N+](=O)[O-] | C05248441 | -16.36 | -1.86 | -17.19 | 5.38  | -2.69 |
| 1001 | c1cnc(c1[N+](=O)[O-])N                 | C14982118 | -16.36 | -3.16 | -16.91 | 4.73  | -1.02 |
| 1002 | CN(c1[nH]nn1)[N+](=O)[O-]              | C25627715 | -16.36 | -5.24 | -16.11 | 6.76  | -1.77 |
| 1003 | CNC(=O)Oc1ccc(cc1)N                    | C01716763 | -16.35 | -0.22 | -22.8  | 7.05  | -0.37 |
| 1004 | c1cc(cc(c1)F)/C=C/C(=O)Cl              | C02574174 | -16.35 | -1.77 | -16.7  | 3.94  | -1.82 |
| 1005 | Cc1ccc(c1)Cl                           | C02599020 | -16.35 | -0.17 | -15.78 | 2.55  | -2.96 |
| 1006 | C=C(c1ccccc1)N=[N+]=[N-]               | C05369766 | -16.35 | -0.62 | -15.6  | 1.88  | -2.02 |
| 1007 | c1cnc(nc1)NN=O                         | C06584933 | -16.35 | -1.16 | -19.34 | 5.96  | -1.8  |
| 1008 | COC(=O)C(F)Br                          | C14628562 | -16.35 | -1.41 | -14.31 | 1.77  | -2.4  |
| 1009 | c1ccc(cc1)C2c(nsn2)O                   | C16125338 | -16.35 | -3.93 | -16.73 | 4.34  | -0.04 |
| 1010 | c1cc2c(cc1N)n[nH]n2                    | C19626986 | -16.35 | -6.81 | -18.24 | 8.15  | 0.55  |
| 1011 | Cc1ccc(cc1)OC(=O)Cl                    | C00389522 | -16.34 | -1.05 | -16.32 | 3.1   | -2.07 |
| 1012 | c1c[nH]cc(c1=O)Cl                      | C02599072 | -16.34 | -2.56 | -17.04 | 3.51  | -0.26 |
| 1013 | c1c(cnc(c1N)N)F                        | C21981774 | -16.34 | -5.47 | -17.34 | 6.19  | 0.28  |
| 1014 | CCOC(=O)[C@H](F)Br                     | C04255720 | -16.33 | -0.69 | -15.71 | 3.07  | -3    |
| 1015 | c1c(c(non1Cl)[N+](=O)[O-])             | C14982438 | -16.33 | -1.99 | -15.58 | 3.85  | -2.61 |
| 1016 | c1cc(nnc1N/C=N/O)Cl                    | C15906878 | -16.33 | -3.23 | -22.1  | 10.52 | -1.51 |
| 1017 | c1cc(c(c1N)F)F                         | C00164526 | -16.32 | -3.26 | -16.03 | 4.87  | -1.91 |
| 1018 | c1ccc(cc1)N(C#N)N                      | C01704255 | -16.32 | -1.76 | -14.15 | 3.97  | -4.38 |
| 1019 | C1=CC=CC(C=C1)C#N                      | C02556987 | -16.32 | 0.37  | -18.03 | 5.11  | -3.77 |
| 1020 | Cc1cncnc1N                             | C02582043 | -16.32 | -4.26 | -14.82 | 3.66  | -0.89 |
| 1021 | Cc1cc(sc1)N=C=O                        | C04200662 | -16.32 | -0.21 | -16.1  | 1.82  | -1.83 |
| 1022 | C/C(=C/C(=O)C(F)F)[O-]                 | C04243025 | -16.32 | -5.52 | -14.44 | 5.58  | -1.93 |
| 1023 | c1cc(ncc1)N                            | C19143839 | -16.32 | -2.6  | -14.55 | 2.72  | -1.89 |
| 1024 | C#Cc1cc(cnc1)Cl                        | C22013250 | -16.32 | 0.31  | -16.48 | 3.22  | -3.38 |
| 1025 | N#Cc1ccccc1                            | benznlrl  | -16.32 | 0.77  | -17.36 | 3.85  | -3.58 |
| 1026 | c1csc1CCO                              | C00391956 | -16.31 | -2.34 | -15.61 | 2.69  | -1.05 |
| 1027 | c1ccc2c(c1)CC(C2)N=C=S                 | C02243801 | -16.31 | -1.48 | -12.02 | 1.93  | -4.74 |
| 1028 | c1cc(c(c1F)N)I                         | C02389393 | -16.31 | -3.22 | -15.25 | 1.59  | 0.56  |
| 1029 | c1c(cnc(c1F)Br)F                       | C02513193 | -16.31 | 0.07  | -17.7  | 2.1   | -0.77 |
| 1030 | c1c(cnc(n1)N)C#N                       | C02559851 | -16.31 | -0.25 | -19.08 | 4.76  | -1.74 |
| 1031 | c1cnn(c1)C#C#N                         | C02584631 | -16.31 | -2.19 | -17.62 | 6.25  | -2.75 |
| 1032 | CC(=S)Nc1ccccc1                        | C20130858 | -16.31 | -1.37 | -17.49 | 6.73  | -4.17 |
| 1033 | c1cnc(c1C#N)N                          | C20357578 | -16.31 | -2.85 | -17.84 | 4.9   | -0.52 |
| 1034 | c1cc(=O)occ1I                          | C21989738 | -16.31 | -1.54 | -16.22 | 5.03  | -3.59 |
| 1035 | Cc1ccc(cc1)SC#N                        | C01095293 | -16.3  | -1.09 | -16.69 | 3.38  | -1.91 |
| 1036 | c1cc2c(cc1N)non2                       | C01504263 | -16.3  | -4.16 | -17.9  | 6.54  | -0.78 |
| 1037 | CC(=C)C(=O)OC=C                        | C01665002 | -16.3  | 0.92  | -17.72 | 3.81  | -3.3  |
| 1038 | Cc1c(nc(nc1F)F)N                       | C02025696 | -16.3  | -4.71 | -15.55 | 4.97  | -1    |
| 1039 | c1cc2c(cc1F)cn[nH]2                    | C12359144 | -16.3  | -1.71 | -16.2  | 3.95  | -2.34 |
| 1040 | c1c(c(cc(c1F)F)F)CO                    | C00403442 | -16.29 | -1.63 | -16.11 | 2.97  | -1.52 |
| 1041 | CCc1ccccc1                             | C00967178 | -16.29 | -0.84 | -14.39 | 2.66  | -3.73 |
| 1042 | c1cc(sc1)CCN=C=O                       | C02169322 | -16.29 | -0.98 | -16.4  | 2.47  | -1.38 |
| 1043 | COC(=O)C(=O)C(F)F                      | C02577560 | -16.29 | -0.54 | -15.74 | 2.25  | -2.26 |
| 1044 | C(=O)C(F)F)C(F)F)Br                    | C04242004 | -16.29 | 0.18  | -14.35 | 0.45  | -2.56 |
| 1045 | Cc1c(c[nH]n1)I                         | C15022021 | -16.29 | -4.22 | -13.39 | 3.34  | -2.02 |
| 1046 | Cc1cc(cnc1)F                           | C02384097 | -16.28 | -1.55 | -16.26 | 2.65  | -1.12 |
| 1047 | CO/C(=N/c1ccccc1)/O                    | C16157438 | -16.28 | -2.48 | -21.29 | 7.28  | 0.2   |
| 1048 | C1Cc2c(sc(n2)N)C1                      | C17126087 | -16.28 | -2.91 | -14.67 | 3.75  | -2.45 |
| 1049 | c1ccc(cc1)CN[NH3+]                     | C19166973 | -16.28 | 1.01  | -18.61 | 2.66  | -1.34 |
| 1050 | c1cc(ccc1CN)N                          | C19171876 | -16.28 | 0.62  | -18.51 | 2.98  | -1.37 |
| 1051 | c1cc(c(nc1)CC)N                        | C21985290 | -16.28 | -2.11 | -17.57 | 4.93  | -1.52 |
| 1052 | c1cc(c(cc1O)Cl)N                       | C00395500 | -16.27 | -3.99 | -15.34 | 3.11  | -0.03 |
| 1053 | CCOC(=O)n1ccccc1                       | C01634244 | -16.27 | 0.83  | -17.47 | 4.01  | -3.64 |
| 1054 | c1cnc(c1F)F                            | C02599070 | -16.27 | -1.97 | -15.17 | 3.05  | -2.17 |
| 1055 | Cc1cc(c(cc1N)F)F                       | C12359155 | -16.27 | -4.1  | -15.31 | 3.96  | -0.82 |
| 1056 | CCOC(=O)C(F)F)Br                       | C01845846 | -16.26 | -0.85 | -13.78 | 1.53  | -3.16 |
| 1057 | c1cc(c(c1N)N)F                         | C02526225 | -16.26 | -3.87 | -16.42 | 4.47  | -0.43 |
| 1058 | Cc1c(cncn1)Cl                          | C14982422 | -16.26 | -0.79 | -15.19 | 2.41  | -2.69 |
| 1059 | c1c(cnc(n1)Br)F                        | C14989449 | -16.26 | -0.06 | -17.03 | 2.81  | -1.98 |
| 1060 | c1ccc(cc1)[C@H](CS)O                   | C32625176 | -16.26 | -0.71 | -16.14 | 2.83  | -2.25 |
| 1061 | COC(=O)Nc1ccc(cc1)F                    | C00243830 | -16.25 | -0.25 | -19.07 | 5.23  | -2.16 |
| 1062 | c1ccc(cc1)C#N                          | C00899417 | -16.25 | 1.04  | -17.58 | 3.86  | -3.57 |
| 1063 | c1cnc(c1N)N                            | C01724764 | -16.25 | -4.45 | -17.39 | 4.67  | 0.92  |
| 1064 | c1csc1C(=O)Cl                          | C02504558 | -16.25 | -1.79 | -15.31 | 3.62  | -2.76 |
| 1065 | c1ccc(c(c1)NC(=O)NN)F                  | C02509220 | -16.25 | -3.45 | -17.88 | 5.79  | -0.7  |
| 1066 | c1cc(ccc1C=NN)[N+](=O)[O-]             | C13542678 | -16.25 | -2.82 | -16.97 | 6.15  | -2.61 |
| 1067 | CN(C)C1nc[nH]n1)N                      | C17024975 | -16.25 | -3.67 | -17.16 | 7.97  | -3.39 |
| 1068 | COC(=O)C=CCBr                          | C17353061 | -16.25 | -1.89 | -14.52 | 3.23  | -3.07 |
| 1069 | c1cnc(c1)NN                            | C00404420 | -16.24 | -2.78 | -16.74 | 4.4   | -1.12 |
| 1070 | Cc1ccccc1O                             | C00901022 | -16.24 | -1.65 | -15.51 | 2.72  | -1.8  |
| 1071 | c1c(nc(nc1F)N)N                        | C01083705 | -16.24 | -4.7  | -15.79 | 4.7   | -0.45 |
| 1072 | C(C(F)F)F)OC(=O)C(F)F)F                | C01847450 | -16.24 | -1.85 | -12.37 | 2.38  | -4.41 |
| 1073 | c1c(cnc(c1F)C#N)F                      | C02510830 | -16.24 | 1.07  | -19.07 | 4.17  | -2.41 |
| 1074 | C1[C]C@@H](OC1)CN=C=S                  | C03882601 | -16.24 | -0.26 | -17.39 | 3.09  | -1.67 |
| 1075 | c1cc(ccc1N)O                           | C04623758 | -16.24 | -2.53 | -17.43 | 3.28  | 0.45  |
| 1076 | c1cc2c[nH]nc2cc1C#N                    | C05086226 | -16.24 | -0.14 | -18.98 | 5.48  | -2.59 |

|      |                                   |           |        |       |        |      |       |
|------|-----------------------------------|-----------|--------|-------|--------|------|-------|
| 1077 | COC(=O)/C=C/N=[N+]=[N-]           | C06379516 | -16.24 | -0.06 | -16.74 | 2.78 | -2.22 |
| 1078 | c1c(con1)[N+](=O)[O-]             | C15782467 | -16.24 | -1.36 | -17.39 | 4.51 | -1.99 |
| 1079 | Cc1ccc(s1)/C=N/N                  | C16982515 | -16.24 | -1.12 | -16.44 | 3.24 | -1.92 |
| 1080 | c1cc(nnc1N)Cl                     | C00967320 | -16.23 | -4.23 | -17.22 | 5.87 | -0.64 |
| 1081 | c1ccc(cc1)OCCON                   | C01673093 | -16.23 | -1.76 | -17.68 | 4.86 | -1.66 |
| 1082 | c1c(c(nc(n1)Cl)N)F                | C01718953 | -16.23 | -3.59 | -14.78 | 3.07 | -0.93 |
| 1083 | c1c(ncnc1)Cl                      | C02513831 | -16.23 | -0.85 | -17.84 | 2.38 | 0.08  |
| 1084 | C(C(F)(F)F)OC(=O)Cl               | C04290611 | -16.23 | -0.87 | -14.89 | 2.27 | -2.73 |
| 1085 | c1cc(cnc1)N                       | C00967327 | -16.22 | -2.48 | -16.68 | 3.45 | -0.5  |
| 1086 | c12c([nH]c(=O)[nH]1)nc3c(n2)non3  | C00972772 | -16.22 | -3.61 | -16.59 | 4.88 | -0.9  |
| 1087 | CC(=O)Oc1ccc(cc1)O                | C01679468 | -16.22 | 0.02  | -20.66 | 6.5  | -2.08 |
| 1088 | c1ccc(cc1)C@H](C=O)O              | C06116374 | -16.22 | -3.27 | -17.26 | 6.5  | -2.19 |
| 1089 | c1cc(ncc1F)C#N                    | C12359109 | -16.22 | -0.32 | -18.12 | 4.59 | -2.36 |
| 1090 | CC(=O)OCc1cccnc1                  | C13281461 | -16.22 | -0.12 | -18.56 | 5.85 | -3.39 |
| 1091 | c1c[nH]c2c1c(ccn2)F               | C14984908 | -16.22 | -2.08 | -16.53 | 5.35 | -2.95 |
| 1092 | c1ccc(cc1)C(=O)N=C=S              | C01652069 | -16.21 | 2.26  | -20.41 | 4.99 | -3.05 |
| 1093 | c1c[nH]cc1[N+](=O)[O-]            | C02527916 | -16.21 | -4.27 | -17.69 | 8.11 | -2.35 |
| 1094 | c1[nH]c(=S)nc(n1)N                | C02566991 | -16.21 | -0.7  | -17.66 | 4.13 | -1.98 |
| 1095 | c1(nc([n-]n1)N[N+](=O)[O-])C(=O)N | C08661649 | -16.21 | -6.94 | -19.86 | 6.47 | 4.12  |
| 1096 | c1cc(ccc1C=O)F                    | C00157154 | -16.2  | -2.2  | -15.8  | 4.99 | -3.18 |
| 1097 | c1cc(cnc1)Cl                      | C02008821 | -16.2  | -2.48 | -16.23 | 3.65 | -1.12 |
| 1098 | C#CCOC(=O)Cl                      | C02562433 | -16.2  | -1.74 | -14.96 | 2.66 | -2.16 |
| 1099 | c1cc(nnc1[S-])Cl                  | C08616233 | -16.2  | -2.27 | -16.93 | 4.63 | -1.63 |
| 1100 | c1cc(nc(c1Cl)N)Cl                 | C19907216 | -16.2  | -3.92 | -13.6  | 3.12 | -1.79 |
| 1101 | CCNc1cc(ccc1F)F                   | C19907910 | -16.2  | -2.12 | -12.83 | 2.04 | -3.3  |
| 1102 | c1ccc(cc1)NC(=O)N                 | C00391870 | -16.19 | -3.29 | -19.52 | 7.07 | -0.45 |
| 1103 | c1c(sc(n1)Br)[N+](=O)[O-]         | C01081253 | -16.19 | -1.95 | -14.26 | 2.49 | -2.47 |
| 1104 | COC1=CCC=CC1                      | C01840966 | -16.19 | 0.3   | -15.34 | 1.86 | -3.01 |
| 1105 | C#Cc1cccc(c1)N                    | C02560531 | -16.19 | -0.23 | -16.85 | 3.58 | -2.69 |
| 1106 | c1cc(c(c(c1CO)F)F)F               | C02575077 | -16.19 | -2.32 | -16.25 | 3.89 | -1.5  |
| 1107 | c1c(c(cc(c1F)N)F)N                | C04334614 | -16.19 | -1.34 | -17.07 | 2.45 | -0.23 |
| 1108 | C(#N)N=C(N)N                      | C05112486 | -16.19 | -5.16 | -13.11 | 4.24 | -2.17 |
| 1109 | c1cc(ccc1N=O)Cl                   | C05328624 | -16.19 | -1.55 | -16.65 | 2.27 | -0.27 |
| 1110 | c1c[nH]nc1/C=N/O                  | C05613512 | -16.19 | -5.63 | -17.21 | 4.78 | 1.87  |
| 1111 | c1c[nH]c2c1cc(cn2)Cl              | C06643319 | -16.19 | -0.72 | -16.63 | 4.43 | -3.27 |
| 1112 | c1cnc(cc1F)N                      | C15444651 | -16.19 | -3.15 | -15.82 | 3.88 | -1.11 |
| 1113 | c1(c(nc(c1F)F)F)[N+](=O)[O-]      | C16159845 | -16.19 | -0.08 | -14.65 | 1.22 | -2.67 |
| 1114 | c1c(c[nH]1)C(F)F                  | C32911377 | -16.19 | -4.27 | -15.45 | 5.04 | -1.52 |
| 1115 | c1cnn(c1)C(F)F                    | C02538923 | -16.18 | -3.11 | -14.76 | 3.61 | -1.91 |
| 1116 | C1COC(=O)/C=C/N=[N+]=[N-]         | C17175261 | -16.18 | -0.72 | -19.53 | 4.74 | -0.68 |
| 1117 | c1ccc(cc1)Cl)N                    | C00047986 | -16.17 | -1.12 | -14.97 | 2.11 | -2.19 |
| 1118 | c1c(c(c(c(c1F)F)F)F)N             | C00388049 | -16.17 | -3.64 | -14.69 | 4.05 | -1.89 |
| 1119 | c1ccc2c(c1)C(C@H)2C#N             | C02140854 | -16.17 | 0.27  | -16.91 | 5.11 | -4.63 |
| 1120 | c1cnc(c(c1)N+)(=O)[O-]            | C02583405 | -16.17 | -3.04 | -15.46 | 5.12 | -2.79 |
| 1121 | c1cc(ncc1F)C(F)F                  | C16159702 | -16.17 | -0.78 | -15.47 | 3.07 | -2.99 |
| 1122 | c1cc(c(cc1Cl)F)O                  | C00389569 | -16.16 | -0.72 | -16.93 | 3.08 | -1.59 |
| 1123 | c1cc(c(c(c1)F)F)N                 | C00409208 | -16.16 | -2.8  | -15.53 | 4.04 | -1.87 |
| 1124 | c1c(c([nH]1))N+)(=O)[O-]Br        | C01049759 | -16.16 | 0.71  | -17.89 | 3.29 | -2.27 |
| 1125 | c1nc([nH]n1)N=N/c2[nH]jncn2       | C05045644 | -16.16 | 0.75  | -18.13 | 6.18 | -4.96 |
| 1126 | CN(C(=O)NCCCl)N=O                 | C05542262 | -16.16 | -2.25 | -17.18 | 3.92 | -0.65 |
| 1127 | c1ccc(cc1)NC=O                    | C13550498 | -16.16 | -3.21 | -19.91 | 6.84 | 0.12  |
| 1128 | c1cnc(c1)N                        | C13952160 | -16.16 | -2.6  | -15.75 | 3.33 | -1.13 |
| 1129 | Cc1csc(n1)N=C(N)N                 | C19419052 | -16.16 | -3.14 | -18.45 | 7.56 | -2.13 |
| 1130 | C=C(C=O)OCc1ccccc1                | C21998761 | -16.16 | 1.28  | -21.42 | 8.45 | -4.48 |
| 1131 | COC(=O)Cc1cccs1                   | C00153594 | -16.15 | -0.33 | -17.19 | 5.21 | -3.85 |
| 1132 | c1cc(cc1C=O)Br                    | C00155120 | -16.15 | -0.92 | -16.05 | 3.13 | -2.31 |
| 1133 | CSc1ccsc1                         | C00161206 | -16.15 | -0.98 | -14.11 | 2.31 | -3.38 |
| 1134 | C=CCn1cccn1                       | C00399151 | -16.15 | -1.52 | -17.38 | 4.21 | -1.45 |
| 1135 | c1ccc(c(c1)/C=C/C(=O)Cl)F         | C02521287 | -16.15 | -0.16 | -19.14 | 4.94 | -1.78 |
| 1136 | c1nc2n(n1)[C@H](N=N2)[N+](=O)[O-] | C04593311 | -16.15 | -0.45 | -17.72 | 5.04 | -3.02 |
| 1137 | c1cncn1C(=O)Cl                    | C12359655 | -16.15 | -2.95 | -16.14 | 4.61 | -1.67 |
| 1138 | C/N=[NH+]/Cc1ccccc1               | C17021521 | -16.15 | -0.84 | -17.09 | 2.8  | -1.03 |
| 1139 | c1cc(ccc1O)F                      | C00164463 | -16.14 | -2.86 | -14.83 | 2.81 | -1.26 |
| 1140 | c1cncn(c1)N(N=O)O                 | C04365544 | -16.14 | -2.39 | -19.39 | 5.89 | -0.24 |
| 1141 | C(/C(=C(Cl)Cl)N)C=S               | C08665400 | -16.14 | 0.66  | -15.47 | 1.39 | -2.72 |
| 1142 | c1cn(cn1)C(=O)C(F)F               | C01081150 | -16.13 | 0.29  | -17.15 | 3.43 | -2.71 |
| 1143 | c1cnc(cc1[N+](=O)[O-])F           | C02526706 | -16.13 | -2.53 | -15.42 | 4.34 | -2.53 |
| 1144 | Cc1ccc(cc1N)O                     | C04293750 | -16.13 | -3.55 | -15.92 | 3.48 | -0.14 |
| 1145 | c1ccc2c(c1)c([nH][nH+])2)N        | C13682782 | -16.13 | -4.89 | -16.67 | 7.07 | -1.65 |
| 1146 | c1cc(ncc1F)CO                     | C14985906 | -16.13 | -1.74 | -17.56 | 3.33 | -0.15 |
| 1147 | c1cc(cnc1)C=NN                    | C17148270 | -16.13 | 0.04  | -19.2  | 3.9  | -0.87 |
| 1148 | C1Cc2c(nc([nH]2)Cl)C1             | C22126196 | -16.13 | -1.93 | -17.11 | 5.88 | -2.97 |
| 1149 | CCc1cnc(nc1)N                     | C25490304 | -16.13 | -2.37 | -15.85 | 4.63 | -2.54 |
| 1150 | C1C=Cc2ccccc21                    | M1995A038 | -16.13 | -1.23 | -12.73 | 2.53 | -4.7  |
| 1151 | Cc1c(non1)C(=O)C                  | C00153433 | -16.12 | -2.54 | -14.48 | 2.67 | -1.77 |
| 1152 | C#C[C@H](c1ccccc1)O               | C02038031 | -16.12 | -0.94 | -15.98 | 3.35 | -2.55 |
| 1153 | c1cc(ncc1F)Cl                     | C02384133 | -16.12 | -1.04 | -16.96 | 2.62 | -0.74 |
| 1154 | COCOc1ccccc1                      | C03163258 | -16.12 | 0     | -16.22 | 3.09 | -2.99 |
| 1155 | c1cc(c(cc1C#N)O)F                 | C12471672 | -16.12 | -1.6  | -17.91 | 4.92 | -1.53 |
| 1156 | CSCc1ccccc1                       | C13218299 | -16.12 | -0.66 | -16.14 | 4.23 | -3.54 |
| 1157 | c1ccc2c(c1)[nH]c([nH+])2)N        | C16889973 | -16.12 | -4.06 | -15.66 | 6.53 | -2.92 |
| 1158 | CNN=Cc1ccccc1                     | C17021523 | -16.12 | 0.18  | -16.33 | 3.2  | -3.17 |
| 1159 | c1cc(ccc1/C=C/C#N)N               | C19075641 | -16.12 | -2.88 | -15.3  | 5.1  | -3.04 |
| 1160 | Cc1ccc(cn1)F                      | C02384095 | -16.11 | -1.63 | -16.38 | 2.96 | -1.05 |
| 1161 | C=Cn1c(nnn1)[O-]                  | C03844473 | -16.11 | -2.97 | -17.65 | 4.06 | 0.45  |
| 1162 | c1c(snn1)Cl                       | C04090397 | -16.11 | -1.15 | -16.51 | 2.63 | -1.08 |
| 1163 | CO/N=C(/c1c(non1)N)N              | C04729052 | -16.11 | -2.24 | -17.48 | 3.08 | 0.53  |
| 1164 | c1cnc(c1)/N=N/O                   | C05159622 | -16.11 | -0.92 | -19.54 | 5.83 | -1.48 |
| 1165 | COC(=O)Cc1ccncc1                  | C08294949 | -16.11 | -0.57 | -19.04 | 6.57 | -3.07 |
| 1166 | c1c(cnc(c1N)F)Br                  | C08698195 | -16.11 | -1.55 | -16.78 | 3.16 | -0.94 |

|      |                                   |           |        |       |        |       |       |
|------|-----------------------------------|-----------|--------|-------|--------|-------|-------|
| 1167 | c1cc(c(c(c1F))N                   | C26892772 | -16.11 | -3.16 | -13.77 | 3.52  | -2.7  |
| 1168 | c1cc(c(c(c1N)Br)F)F               | C31829582 | -16.11 | -3.29 | -15.6  | 5.12  | -2.34 |
| 1169 | Cc1cccc(c1)N                      | C03861040 | -16.1  | -3.29 | -12.65 | 2.07  | -2.22 |
| 1170 | c1c(con1)Br                       | C04235230 | -16.1  | -0.65 | -16.31 | 2.71  | -1.85 |
| 1171 | CCSC(=N-)C(F)(F)F                 | C04620656 | -16.1  | -2.79 | -13.88 | 2.04  | -1.47 |
| 1172 | c1cc(c(nc1)N)F                    | C19616068 | -16.1  | -1.56 | -16.95 | 3.72  | -1.31 |
| 1173 | c1c(ncn1)C=O                      | C00154066 | -16.09 | -2.56 | -18.01 | 6.18  | -1.7  |
| 1174 | c1ccnc(c1)Cl                      | C00404334 | -16.09 | -0.59 | -16.86 | 3.78  | -2.42 |
| 1175 | CCOC1cccs1                        | C01586926 | -16.09 | -1.61 | -16.3  | 2.33  | -0.52 |
| 1176 | CO(=O)Cc1cccc1N                   | C02540630 | -16.09 | -1.64 | -17.64 | 6.13  | -2.93 |
| 1177 | c1c(c(n[nH]1)C(=O)Cl)Cl           | C05941977 | -16.09 | 1.01  | -18.95 | 3.34  | -1.49 |
| 1178 | c1cncc2c1[nH+]c[nH]2              | C15042100 | -16.09 | -4.33 | -16.92 | 7.09  | -1.92 |
| 1179 | CO(=O)c1cn[nH]n1                  | C16052238 | -16.09 | -2.74 | -18.07 | 4.85  | -0.14 |
| 1180 | c1cc(cc(c1)F)CC#N                 | C16159619 | -16.09 | -1.43 | -15.87 | 6.09  | -4.88 |
| 1181 | c1cnn(c1N)C(=O)N                  | C01659964 | -16.08 | -3.54 | -18.98 | 5.21  | 1.23  |
| 1182 | c1cnoc1C(F)(F)F                   | C02568253 | -16.08 | -1.91 | -14.77 | 2.9   | -2.31 |
| 1183 | c1c(nc[nH]1)C(F)(F)F              | C08698428 | -16.08 | -4.96 | -15.53 | 6.85  | -2.43 |
| 1184 | Cc1cc(on1)CBr                     | C12370186 | -16.08 | -1.65 | -15.43 | 4.13  | -3.13 |
| 1185 | CO(=O)CNC1cccc1                   | C21799249 | -16.08 | -2.86 | -15.97 | 5.84  | -3.09 |
| 1186 | c1cc2c(cc1O)non2                  | C00161315 | -16.07 | -3.05 | -17.98 | 5.2   | -0.25 |
| 1187 | Cc1ccc(cc1F)N                     | C00164593 | -16.07 | -2.26 | -14.34 | 2.78  | -2.25 |
| 1188 | C(CBr)OC(=O)Cl                    | C02242592 | -16.07 | -0.21 | -16.05 | 2.89  | -2.7  |
| 1189 | c1cnccc1F                         | C02525804 | -16.07 | -1.35 | -15.17 | 2.56  | -2.11 |
| 1190 | c1cc(ccc1N)SC(F)F                 | C02572376 | -16.07 | -0.56 | -16.48 | 3.7   | -2.73 |
| 1191 | c1c(nc[nH]1)Br                    | C08294972 | -16.07 | -4.48 | -15.26 | 5.77  | -2.09 |
| 1192 | CO(=O)c1c(cccn1)N                 | C14982149 | -16.07 | -3.51 | -17.34 | 6     | -1.21 |
| 1193 | C=CCOC(=O)C(F)(F)Br               | C16082658 | -16.07 | -0.86 | -13.05 | 1.39  | -3.55 |
| 1194 | c1c(ccc1Cl)O                      | C00164486 | -16.06 | -0.8  | -17.93 | 2.97  | -0.3  |
| 1195 | c1ccc2c(c1)[nH](c2)NC#N           | C00394716 | -16.06 | -8.02 | -6.78  | 4.92  | -6.18 |
| 1196 | c1cc(c(nc1)F)Br                   | C02526710 | -16.06 | -0.44 | -17.76 | 4.58  | -2.44 |
| 1197 | C1CCC(=CC1)CC#N                   | C03860303 | -16.06 | -1.47 | -14.71 | 4.48  | -4.36 |
| 1198 | CCOC(=O)/C=Cl                     | C04975987 | -16.06 | -0.46 | -15.53 | 3.45  | -3.52 |
| 1199 | c1c(sc(n1)NN=O)[N+](=O)[O-]       | C06524518 | -16.06 | -3.05 | -18.82 | 4.64  | 1.16  |
| 1200 | c1cc2c(cc1F)nc(o2)N               | C08614802 | -16.06 | -4.06 | -15.25 | 3.27  | -0.03 |
| 1201 | c1cc(c(cc1O)N)F                   | C11919363 | -16.06 | -2.66 | -17.13 | 3.34  | 0.39  |
| 1202 | c1cncc(c1)/C(=N/O)N               | C12505254 | -16.06 | -4.11 | -17.5  | 5.21  | 0.34  |
| 1203 | c1c2c([nH](c2)NO)ncn1             | C17174545 | -16.06 | -8.27 | -16.56 | 9.86  | -1.09 |
| 1204 | c1[nH]nc(n1)N[N+](=O)[O-]         | C18082053 | -16.06 | -5.22 | -17.99 | 10.45 | -3.31 |
| 1205 | C[NH2+]NCC1cccc1                  | C19167414 | -16.06 | -1.76 | -14.72 | 2.46  | -2.04 |
| 1206 | c1cc2c(cc1F)[nH]cn2               | C32497100 | -16.06 | -4.32 | -14.89 | 6.44  | -3.29 |
| 1207 | CN(c1cnns1)N                      | C32911288 | -16.06 | -3.87 | -18.45 | 6.29  | -0.04 |
| 1208 | c1cc(cc(c1Cl)F)NN                 | C01494959 | -16.05 | -0.42 | -16.19 | 2.48  | -1.92 |
| 1209 | c1cc(nnc1N)Br                     | C02382954 | -16.05 | -4.17 | -16.92 | 5.75  | -0.72 |
| 1210 | c1cc(sc1CC)Cl                     | C02539266 | -16.05 | -2.07 | -11.87 | 2.04  | -4.15 |
| 1211 | CC1=CCCC(=O)O1                    | C04529437 | -16.05 | -1.32 | -16.4  | 4.98  | -3.31 |
| 1212 | C=CCn1nc(n1)N                     | C17105010 | -16.05 | -3.48 | -16.86 | 6.48  | -2.18 |
| 1213 | c1cc(cc(c1F)N)Sc2[nH]ncn2         | C19869340 | -16.05 | -3.4  | -15.9  | 6.12  | -2.87 |
| 1214 | c1c(c(ncn1)Cl)Cl                  | C22009763 | -16.05 | -1.22 | -14.66 | 2.43  | -2.6  |
| 1215 | c1(c(c(c(c1F)Br)F)F)F             | L2009A003 | -16.05 | 0.44  | -12.88 | 0.43  | -4.04 |
| 1216 | c1cc(c(cc1N)Cl)N                  | C00388453 | -16.04 | -3.32 | -14.51 | 2.39  | -0.6  |
| 1217 | Cc1ccc2c(c1)[nH]n2                | C00406978 | -16.04 | -5.43 | -13.86 | 5.04  | -1.79 |
| 1218 | c1c(nc(s1)N)C(F)(F)F              | C00967258 | -16.04 | -3.23 | -16.18 | 4.67  | -1.31 |
| 1219 | c1c(cnc(n1)NN)C#N                 | C01391058 | -16.04 | -1.6  | -18.04 | 5.33  | -1.73 |
| 1220 | c1cc(sc1)/C=C/C(=O)Cl             | C02379211 | -16.04 | -1.54 | -17.1  | 3.3   | -0.69 |
| 1221 | CNc1ccc(cc1)N                     | C04262606 | -16.04 | -2.91 | -14.64 | 2.44  | -0.94 |
| 1222 | C(=O)(C(=O)C(F)(F)C(F)(F)F)       | C04265862 | -16.04 | 0.68  | -15.69 | 1.02  | -2.05 |
| 1223 | C=C/N=N/Nc1cccc1                  | C17109761 | -16.04 | 1.14  | -17.53 | 3.46  | -3.11 |
| 1224 | c1cc(ncc1Cl)F                     | C01596028 | -16.03 | -0.73 | -17.51 | 2.86  | -0.64 |
| 1225 | c1cc(ncc1[N+](=O)[O-])F           | C01628309 | -16.03 | -2.09 | -16.9  | 4.13  | -1.18 |
| 1226 | C[C@H](c1cccc1F)O                 | C02560496 | -16.03 | -1.02 | -16.23 | 3.38  | -2.15 |
| 1227 | C[C@H](c1ccccc1)O                 | C06037199 | -16.03 | -1.23 | -15.71 | 2.22  | -1.32 |
| 1228 | C=Cc1cn[nH]1                      | C13284960 | -16.03 | -5.05 | -14.25 | 5.86  | -2.59 |
| 1229 | c1cnccc1C(=O)N=[N+]=[N-]          | C15784784 | -16.03 | 1.2   | -21.8  | 3.67  | 0.9   |
| 1230 | c1cncc(c1CC)N                     | C21985286 | -16.03 | -2.04 | -17.48 | 4.84  | -1.36 |
| 1231 | c1ccc(cc1)NC(=S)C#N               | C00155222 | -16.02 | -3.43 | -14.49 | 5.63  | -3.73 |
| 1232 | c1cc(c(cc1Cl)O)Cl                 | C00388512 | -16.02 | -2.57 | -13.73 | 2.31  | -2.02 |
| 1233 | COc1cccc1                         | C02242715 | -16.02 | -1.03 | -15.92 | 3.18  | -2.24 |
| 1234 | C[C@H](c1cccn1)O                  | C02383113 | -16.02 | -1.69 | -17.4  | 3.84  | -0.76 |
| 1235 | CO(=O)C(=C(F)F)F                  | C02555202 | -16.02 | -1.21 | -14.65 | 2.04  | -2.2  |
| 1236 | CC(=O)/C=C/c1cccn1                | C15838226 | -16.02 | -2.57 | -15.83 | 5.8   | -3.42 |
| 1237 | c1cc(ccc1CC#N)O                   | C00164447 | -16.01 | -1.62 | -19.76 | 7.43  | -2.06 |
| 1238 | c1c(cc(nc1F)F)F                   | C02585568 | -16.01 | -0.12 | -16.31 | 2.46  | -2.03 |
| 1239 | c1(nnc(s1)NN)N                    | C17173590 | -16.01 | -4.29 | -16.58 | 4     | 0.85  |
| 1240 | c1nc(c2c(n1)sn2)N                 | C01674122 | -16    | -3.33 | -17.14 | 4.64  | -0.16 |
| 1241 | c1ccc(cc1)/C=C/[N+](=O)[O-]       | C01700197 | -16    | -0.22 | -15.58 | 4.78  | -4.97 |
| 1242 | [C@@H](C(=O)Br)C(F)(F)F           | C02524526 | -16    | -0.33 | -15.69 | 2.39  | -2.37 |
| 1243 | c1cncc(cc1F)Cl                    | C02525818 | -16    | -0.58 | -15.62 | 2.68  | -2.47 |
| 1244 | c1cc(c(c1F)CC#N)F                 | C04290230 | -16    | -0.04 | -18.29 | 6.05  | -3.72 |
| 1245 | c1c(ncn1[N+](=O)[O-])[N+](=O)[O-] | C05323064 | -16    | -2.64 | -14.67 | 5.68  | -4.37 |
| 1246 | c1[nH]nc(n1)Cl                    | C05380440 | -16    | -2.34 | -15.25 | 3.31  | -1.73 |
| 1247 | c1c(cn1)CC(F)F                    | C12397692 | -16    | -2.51 | -17.09 | 4.4   | -0.81 |
| 1248 | c1c(ncs1)CBr                      | C20358139 | -16    | -1.19 | -16.07 | 3.49  | -2.23 |
| 1249 | c1cc(cc(c1Cl)N)Br                 | C02567820 | -15.99 | -3.37 | -11.47 | 1.5   | -2.65 |
| 1250 | c1cn(nc1N)CC(F)F                  | C12395178 | -15.99 | -2.35 | -17.3  | 5.21  | -1.54 |
| 1251 | c1cc(nc(c1[N+](=O)[O-])N)Cl       | C18996093 | -15.99 | -3.11 | -14.39 | 3.79  | -2.27 |
| 1252 | C1C2c(n[nH]c2C#N)C1               | C24408467 | -15.99 | -2.35 | -15.92 | 4.65  | -2.38 |
| 1253 | (C(=C(F)F)OC(F)F)F                | C04290222 | -15.99 | -0.25 | -14.6  | 0.66  | -1.59 |
| 1254 | c1ccc2c(c1)nsn2                   | C00151237 | -15.98 | -2.33 | -16.48 | 4.69  | -1.86 |
| 1255 | c1cnccc1CC#N                      | C00409321 | -15.98 | -1.17 | -19.5  | 7.5   | -2.82 |
| 1256 | c1cnc([nH]1)[N+](=O)[O-]          | C01481980 | -15.98 | -3.75 | -17.29 | 8.8   | -3.74 |

|      |                               |           |        |       |        |      |       |
|------|-------------------------------|-----------|--------|-------|--------|------|-------|
| 1257 | c1cc(oc1)[N+](=O)[O-]         | C01689931 | -15.98 | -2.71 | -17.76 | 6.78 | -2.29 |
| 1258 | c1c2c(nc(n1)N)CCC2            | C18531251 | -15.98 | -5.25 | -15.42 | 7.88 | -3.19 |
| 1259 | c1ccc(c(c1)CO)F               | C00164568 | -15.97 | 0.22  | -17.86 | 3.13 | -1.46 |
| 1260 | COc1ccsc1                     | C00389817 | -15.97 | -1.76 | -14.72 | 2.63 | -2.13 |
| 1261 | C=CC(=O)OCC#C                 | C01766085 | -15.97 | -0.42 | -17.05 | 4.71 | -3.21 |
| 1262 | c1ccc(c(c1)N)[N+](=O)[O-]     | C03860642 | -15.97 | -1.92 | -17.41 | 5.79 | -2.42 |
| 1263 | C=CCOn1ccnc1                  | C04002507 | -15.97 | -1.5  | -15.25 | 4.24 | -3.46 |
| 1264 | c1c(c(ncn1)N)[N+](=O)[O-]     | C04114388 | -15.97 | -2.29 | -18.54 | 4    | 0.87  |
| 1265 | c1cn2c(n1)NCC2                | C11920166 | -15.97 | -2.85 | -16.94 | 6.59 | -2.78 |
| 1266 | c1cc(ccc1OCCO)F               | C15014797 | -15.97 | -3.56 | -15.99 | 4.66 | -1.08 |
| 1267 | c1cn(cn1)C(=O)OCC#N           | C21991421 | -15.97 | -3.74 | -16.35 | 7.17 | -3.04 |
| 1268 | c1cc(c(cc1O)O)Cl              | C00404336 | -15.96 | -1.32 | -18.85 | 3.7  | 0.52  |
| 1269 | c1c(ncnc1N)N                  | C00967323 | -15.96 | -3.77 | -16.71 | 4.52 | 0     |
| 1270 | c1cnn(c1)[N+](=O)[O-]         | C02146824 | -15.96 | -2.49 | -18.07 | 6.52 | -1.92 |
| 1271 | c1c(cc(c1F)N)F                | C02243351 | -15.96 | -1.26 | -17.96 | 2.93 | 0.34  |
| 1272 | c1cc(c(cc1C#N)F)N             | C02516094 | -15.96 | -0.58 | -18.01 | 4.68 | -2.04 |
| 1273 | CCOOC(=O)N[N+](=O)[O-]        | C04507511 | -15.96 | -4.94 | -14.52 | 2.96 | 0.53  |
| 1274 | c1cc(ccc1NN=O)[N+](=O)[O-]    | C08656046 | -15.96 | -3.52 | -16.19 | 6.09 | -2.34 |
| 1275 | c1cnc2c1np[nH]2               | C08667498 | -15.96 | -3.72 | -16.16 | 3.82 | 0.11  |
| 1276 | C#Cc1cnc(cn1)Br               | C30678103 | -15.96 | -0.86 | -17.87 | 4.88 | -2.11 |
| 1277 | c1cc(sc1)C(=O)c2[nH]ccn2      | C00146169 | -15.95 | 0.47  | -19.72 | 6.57 | -3.27 |
| 1278 | c1c(cnc1)Cl                   | C02510623 | -15.95 | -1.2  | -15.52 | 2.77 | -2    |
| 1279 | CC1=CSCC(=O)N1                | C03846685 | -15.95 | -2.25 | -16.64 | 4.35 | -1.41 |
| 1280 | c1cc(cc(c1)F)CS               | C04244654 | -15.95 | -1.63 | -15.9  | 2.5  | -0.92 |
| 1281 | c1c(cn(n1)N)[N+](=O)[O-]      | C04294111 | -15.95 | -3.18 | -18.71 | 6.78 | -0.84 |
| 1282 | c1cc(c(c1)N)C(F)(F)F          | C19735913 | -15.95 | -2.37 | -15.11 | 3.47 | -1.94 |
| 1283 | c1c(ncs1)CS                   | C31890176 | -15.95 | -1.99 | -15.77 | 3.7  | -1.9  |
| 1284 | COC(=O)C=C(F)C(F)(F)F         | C02031428 | -15.94 | -0.91 | -14.42 | 2.35 | -2.95 |
| 1285 | CC1=CC(=O)CCC1                | C03860608 | -15.94 | -0.69 | -15.25 | 3.34 | -3.34 |
| 1286 | C(=O)C(F)C(F)Cl               | C04329286 | -15.94 | -0.14 | -14.76 | 0.52 | -1.55 |
| 1287 | C1CCC(=CC1)/C=C/C#N           | C05103577 | -15.94 | -0.13 | -17.36 | 3.68 | -2.13 |
| 1288 | c1c(c(ncn1)N)C(=S)N           | C05580303 | -15.94 | -2.98 | -15.53 | 3.13 | -0.56 |
| 1289 | c1cc(ncc1NN=O)Cl              | C06536611 | -15.94 | -4.51 | -17.11 | 4.37 | 1.32  |
| 1290 | c1c(cnc1Br)N=C=O              | C12370808 | -15.94 | -1.12 | -15.68 | 1.82 | -0.95 |
| 1291 | c1nncn1N[N+](=O)[O-]          | C15767158 | -15.94 | -1.01 | -18.76 | 6.77 | -2.94 |
| 1292 | COC(=O)CNC(=O)N1ccnc1         | C26189414 | -15.94 | -5.31 | -15.13 | 7.09 | -2.6  |
| 1293 | c1c(c2cncnc2[nH]1)Cl          | C33359058 | -15.94 | -4.63 | -14.38 | 6.15 | -3.08 |
| 1294 | c1cc(ccc1C=N/O)F              | C00153662 | -15.93 | -1.29 | -18.33 | 5.52 | -1.82 |
| 1295 | c1cc(ccc1CON)F                | C00168568 | -15.93 | 0.93  | -18.33 | 3.28 | -1.8  |
| 1296 | Cc1ccc(c(c1)F)N               | C00389592 | -15.93 | -0.44 | -15.76 | 2.54 | -2.27 |
| 1297 | c1cc([nH]c1)C(=O)Cl           | C01683282 | -15.93 | -2.57 | -16.05 | 4.7  | -2.01 |
| 1298 | C#CC(=O)c1cccc1               | C01725590 | -15.93 | 0.01  | -18.27 | 6.43 | -4.1  |
| 1299 | C#Cc1cccn1                    | C02390334 | -15.93 | -0.71 | -17.73 | 5.41 | -2.91 |
| 1300 | Cc1ccc(nc1)F                  | C04255973 | -15.93 | -1.73 | -15.89 | 4.18 | -2.49 |
| 1301 | c1c(cnc(c1N)N)Cl              | C18995692 | -15.93 | -5.72 | -13.69 | 3.5  | -0.02 |
| 1302 | c1cc(ncc1[N+](=O)[O-])Br      | C00331610 | -15.92 | -2.35 | -14.24 | 3.69 | -3.02 |
| 1303 | c1cc(c(cc1F)Cl)O              | C00388394 | -15.92 | 0.29  | -17.35 | 2.81 | -1.68 |
| 1304 | Cc1ccc(cc1)O                  | C00897142 | -15.92 | -1.57 | -15.48 | 2.8  | -1.66 |
| 1305 | C(#N)/C=C(C#N)F               | C01606792 | -15.92 | -0.19 | -14.73 | 2.96 | -3.95 |
| 1306 | C/C=C/Cc1ccc(cc1)O            | C01866906 | -15.92 | -0.8  | -17.69 | 2.73 | -0.15 |
| 1307 | COC(=O)Nc1ccc(cc1)N           | C02243618 | -15.92 | -0.49 | -22.79 | 5.92 | 1.44  |
| 1308 | c1ccc(cc1)CNC(=O)O            | C11535717 | -15.92 | -1.23 | -21.88 | 5.2  | 1.98  |
| 1309 | c1cc(c(cc1Cl)N)N              | C00388066 | -15.91 | -4.71 | -13.31 | 2.74 | -0.62 |
| 1310 | CC(=O)SCC=C                   | C01611273 | -15.91 | -0.48 | -15.25 | 2.68 | -2.86 |
| 1311 | c1cc(cnc1)CN=C=S              | C02528215 | -15.91 | -0.45 | -16.51 | 3.63 | -2.58 |
| 1312 | c1[nH]c(c(n1)N)[N+](=O)[O-]   | C12957904 | -15.91 | -3.51 | -17.84 | 7.66 | -2.22 |
| 1313 | C(=[NH+])N(N)N)/C(=[NH+])N)/N | C13856292 | -15.91 | -4.69 | -17.4  | 3.38 | 2.79  |
| 1314 | c12c([nH]c(=O)[nH]1)non2      | C16382880 | -15.91 | -7.87 | -18.35 | 8.49 | 1.81  |
| 1315 | c1c(cnc(c1[O-])F)Cl           | C21981949 | -15.91 | -1.36 | -18.11 | 3.85 | -0.29 |
| 1316 | c1ccc(cc1)CSC(F)F             | C32627719 | -15.91 | -2.66 | -10.69 | 2.61 | -5.17 |
| 1317 | Cc1ccc(nc1)Cl                 | C00152326 | -15.9  | -0.82 | -15.52 | 3.39 | -2.94 |
| 1318 | c1ccc(c(c1)O)F                | C00164476 | -15.9  | -2.53 | -15.93 | 3.9  | -1.34 |
| 1319 | c1cc2c(noc2nc1)N              | C00168472 | -15.9  | -3.86 | -18.85 | 6.54 | 0.26  |
| 1320 | c1csc(n1)NN=O                 | C06585052 | -15.9  | -1.97 | -18.24 | 5.09 | -0.77 |
| 1321 | c1cnc(nc1)CCl                 | C11887620 | -15.9  | -0.17 | -17.87 | 4.56 | -2.43 |
| 1322 | c1c(nc(n1)N)C(F)(F)F          | C21994014 | -15.9  | -0.28 | -19.04 | 4.79 | -1.37 |
| 1323 | c1ccc(cc1)CNC(=O)N            | C00157440 | -15.89 | 0.07  | -21.92 | 6.38 | -0.42 |
| 1324 | CC(=O)n1ccnc1                 | C00388370 | -15.89 | -2.95 | -17.39 | 6.99 | -2.54 |
| 1325 | C#CCOc1c(c(nc(c1F)F)F)F       | C02483190 | -15.89 | 0.14  | -15.5  | 2.74 | -3.27 |
| 1326 | c1cc(c(c(c1)F)Cl)N            | C02513560 | -15.89 | -2.68 | -16.65 | 3.29 | 0.16  |
| 1327 | Cc1cnn(c1)CCl                 | C02536482 | -15.89 | -2.02 | -15.32 | 4.37 | -2.91 |
| 1328 | c1cn(cn1)CCCl                 | C02569851 | -15.89 | -0.77 | -15.77 | 4.58 | -3.93 |
| 1329 | c1cc(cc(c1)Br)N               | C03861310 | -15.89 | -1.41 | -14.29 | 2.08 | -2.27 |
| 1330 | c1c(ncs1)Br                   | C04198774 | -15.89 | -2.1  | -15.61 | 3.5  | -1.67 |
| 1331 | Cc1cc(on1)CCl                 | C04218850 | -15.89 | -1.67 | -15.55 | 4.36 | -3.03 |
| 1332 | Cc1ccc(cn1)C#N                | C00166514 | -15.88 | 0.12  | -17.59 | 4.46 | -2.86 |
| 1333 | CCOc1cccn1                    | C00331682 | -15.88 | -1.9  | -15.81 | 3.6  | -1.77 |
| 1334 | C1CC=C(C1)CC#N                | C02242643 | -15.88 | -1.38 | -15.12 | 4.58 | -3.96 |
| 1335 | CSc1nc(sn1)[S-]               | C02569840 | -15.88 | -2.61 | -15.57 | 4    | -1.72 |
| 1336 | CC(=O)N/C(=N/C#N)N            | C05430946 | -15.88 | -5.09 | -16.32 | 5.52 | 0     |
| 1337 | [H]N=C(N)/N/C(=N)c1cccn1)/N   | C12524107 | -15.88 | -1.36 | -20.51 | 9.88 | -3.88 |
| 1338 | c1ccc(c(c1)O)O                | C13512214 | -15.88 | -3.35 | -16.58 | 3.77 | 0.28  |
| 1339 | c1cnc(c(c1F)F)F               | C14983673 | -15.88 | -2.01 | -16.27 | 4.51 | -2.11 |
| 1340 | c1cc(cnc1)NN                  | C19737047 | -15.88 | -2.34 | -18.42 | 5.17 | -0.29 |
| 1341 | CNc1cccn1                     | C25494514 | -15.88 | -2.9  | -15.65 | 4.43 | -1.76 |
| 1342 | c1cc(c(cc1N)F)Br              | C00338968 | -15.87 | 0.35  | -17.2  | 3.22 | -2.25 |
| 1343 | c1ccc(cc1)C=O                 | C00895145 | -15.87 | -1.66 | -16.04 | 4.98 | -3.14 |
| 1344 | CCc1nnc(n1)N                  | C02023573 | -15.87 | -1.42 | -16.81 | 4.13 | -1.77 |
| 1345 | Cc1cnn(c1)[N+](=O)[O-]        | C02390474 | -15.87 | -2.75 | -17.19 | 5.83 | -1.77 |
| 1346 | c1c(c(c(c(n1)N)F)C(F)(F)F)F   | C02513195 | -15.87 | -0.66 | -16.48 | 3.13 | -1.86 |

|      |                                     |           |        |       |        |       |       |
|------|-------------------------------------|-----------|--------|-------|--------|-------|-------|
| 1347 | c1cc(c(c1F)F)NBr                    | C02513894 | -15.87 | -2.91 | -15.33 | 2.41  | -0.04 |
| 1348 | c1cc(c(c1F)Br)O                     | C02524482 | -15.87 | -1.6  | -16.62 | 4.1   | -1.76 |
| 1349 | Cc1cnccc1Cl                         | C02578098 | -15.87 | -1.86 | -13.45 | 2.29  | -2.85 |
| 1350 | c1cnc(c(c1Cl)Cl)F                   | C14982615 | -15.87 | -2.85 | -13.92 | 3.61  | -2.71 |
| 1351 | CCOC(=O)C=CCF                       | C17285154 | -15.87 | -0.73 | -15.12 | 3.39  | -3.41 |
| 1352 | c1cc(sc1)CC=O                       | C19729366 | -15.87 | -2.5  | -15.27 | 4.94  | -3.05 |
| 1353 | c1cc(cnc1)Nc2ncccn2                 | C21995867 | -15.87 | 0.69  | -18.55 | 6.21  | -4.22 |
| 1354 | c1c2c(cnn1)n[nH]n2                  | C26506608 | -15.87 | -5.94 | -17.83 | 6.99  | 0.9   |
| 1355 | c1ccc(cc1)NCC#N                     | C01683664 | -15.86 | -3.44 | -14.27 | 4.8   | -2.95 |
| 1356 | CC(=S)Nc1ccc(cc1)F                  | C09086570 | -15.86 | -1.57 | -17.01 | 6.64  | -3.92 |
| 1357 | c1cnccc1NN                          | C11919487 | -15.86 | -1.82 | -17.73 | 3.94  | -0.25 |
| 1358 | c1cc(ccc1C#N)N                      | C00152697 | -15.85 | 0.22  | -18.73 | 4.62  | -1.97 |
| 1359 | c1cc(c(c1F)C#N)N                    | C00153053 | -15.85 | -2    | -17.52 | 5.69  | -2.02 |
| 1360 | c1cc(c(cc1F)O)Br                    | C00389860 | -15.85 | -1.06 | -17.76 | 2.48  | 0.5   |
| 1361 | Cc1cnccn1                           | C01661081 | -15.85 | -1.92 | -16.57 | 3.81  | -1.16 |
| 1362 | c1cc(ccc1C(=O)Cl)F[N+](=O)[O-]      | C02243158 | -15.85 | -3.35 | -15.64 | 4.98  | -1.84 |
| 1363 | c1csccl1CBr                         | C02513314 | -15.85 | -1.23 | -16.45 | 1.81  | 0.02  |
| 1364 | c1c(ncs1)CCl                        | C02566814 | -15.85 | -1.21 | -16.26 | 3.74  | -2.11 |
| 1365 | c1c(ncnc1Cl)[N+](=O)[O-]            | C02599046 | -15.85 | -1.06 | -14.9  | 3.05  | -2.93 |
| 1366 | c1ccnc(c1)OCC#N                     | C02703484 | -15.85 | -1.43 | -18.06 | 5.28  | -1.64 |
| 1367 | C=CCNC(=O)C(F)(F)F                  | C03100061 | -15.85 | -0.84 | -16.94 | 3.25  | -1.32 |
| 1368 | c1(c(nc2c(n1)non2)Cl)N              | C03121914 | -15.85 | -6.8  | -15.82 | 5.55  | 1.21  |
| 1369 | C(CO[N+](=O)[O-])CO[N+](=O)[O-]     | C04743754 | -15.85 | -0.49 | -14.4  | 3.52  | -4.48 |
| 1370 | c1c(ncnc1)BrBr                      | C15022219 | -15.85 | -1.73 | -14.61 | 2.16  | -1.67 |
| 1371 | c1ccc(c(c1)Cl)Cl                    | M2007001_ | -15.85 | -1.77 | -12.36 | 2.32  | -4.05 |
| 1372 | COc(=O)C(=O)Cl                      | C02242601 | -15.84 | -1.57 | -14.67 | 2.19  | -1.8  |
| 1373 | c1cc(c(cc1O)F)N                     | C02555149 | -15.84 | -2.85 | -17.07 | 3.67  | 0.41  |
| 1374 | c1cc2cn[nH]c2cc1Cl                  | C04878475 | -15.84 | 0.08  | -16.78 | 3.62  | -2.76 |
| 1375 | c1nc([nH]n1)N=C(C(F)(F)F)[O-]       | C05510755 | -15.84 | 0.93  | -20.59 | 5.8   | -1.97 |
| 1376 | c1cc(cnc1)/C=C/[N+](=O)[O-]         | C13227015 | -15.84 | -0.35 | -18.04 | 6.19  | -3.64 |
| 1377 | CSc1ccc(cc1)C(F)(F)F                | C19615578 | -15.84 | -0.07 | -13.16 | 2.31  | -4.91 |
| 1378 | Cc1ccc(c(c1)O)N                     | C00388270 | -15.83 | -3.45 | -15.29 | 3.03  | -0.13 |
| 1379 | c1ccc(cc1)CCN=C=O                   | C02384722 | -15.83 | -0.37 | -15.85 | 2.42  | -2.03 |
| 1380 | c1[nH](cnn1)[S-]                    | C04084758 | -15.83 | -3.26 | -14.92 | 3.67  | -1.32 |
| 1381 | C(#N)C(C(=C(F)F)F)F                 | C16082619 | -15.83 | 0.25  | -14.98 | 1.47  | -2.57 |
| 1382 | Cc1ccc(c1N)F                        | C16158148 | -15.83 | -3.15 | -12.86 | 2.59  | -2.41 |
| 1383 | c1c(c(nc1)N)Cl                      | C31176453 | -15.83 | -1.53 | -16.58 | 4.23  | -1.94 |
| 1384 | c1ccc2c(c1)[nH]cn2                  | C00331902 | -15.82 | -3.19 | -15.76 | 6.36  | -3.23 |
| 1385 | c1ccn(c1)N                          | C02169662 | -15.82 | -2.43 | -14.43 | 2.72  | -1.68 |
| 1386 | C1(=NSC(=NS1)Cl)Cl                  | C04887163 | -15.82 | -1    | -17.09 | 1.06  | 1.22  |
| 1387 | c1c(scn1)[N+](=O)[O-]               | C12471766 | -15.82 | -1.99 | -17.75 | 5.85  | -1.94 |
| 1388 | c1c(cnc1F)NNCl                      | C16158741 | -15.82 | -2.93 | -14.25 | 2.75  | -1.39 |
| 1389 | c1c(c(nc1)F)F                       | C30718802 | -15.82 | -1.08 | -16.29 | 3.04  | -1.49 |
| 1390 | c1ccc(cc1)NCC#N                     | G2008A001 | -15.82 | -3.62 | -14.04 | 4.8   | -2.95 |
| 1391 | c1cc(c(nc1)F)[N+](=O)[O-]           | C02383998 | -15.81 | -3.87 | -17.74 | 8.32  | -2.52 |
| 1392 | c1cc(c(c1)F)C=O                     | C02539337 | -15.81 | -2.58 | -16    | 5.99  | -3.21 |
| 1393 | c1ccc(nc1)FCl                       | C02598988 | -15.81 | -2.74 | -15.28 | 4.6   | -2.39 |
| 1394 | c1c(ncn1)[S-]Cl                     | C04228198 | -15.81 | -1.31 | -15.34 | 2.65  | -1.82 |
| 1395 | Cc1csc(n1)N                         | C05438431 | -15.81 | -2.53 | -15.29 | 3.45  | -1.44 |
| 1396 | c1ccc(cc1)N(N=O)O                   | C12358639 | -15.81 | -3.64 | -13.46 | 3.47  | -2.18 |
| 1397 | [H]/N=C\1/C(=C(C#N)/N)/NC=N1        | C13217433 | -15.81 | -6.77 | -15.87 | 7.37  | -0.54 |
| 1398 | CCc1cnc(nc1)F                       | C22016529 | -15.81 | -1.67 | -16.59 | 4.98  | -2.52 |
| 1399 | c1cc2c([nH]nc2Cl)nc1                | C22054899 | -15.81 | -1.88 | -16.9  | 5.07  | -2.1  |
| 1400 | c1ccc(nc1)NCl                       | C00331618 | -15.8  | -3.63 | -15.73 | 4.25  | -0.69 |
| 1401 | c1nc([n-]n1)n2cnnc2                 | C01300688 | -15.8  | -4.91 | -16.96 | 11.62 | -5.54 |
| 1402 | c1ccc(c(c1)/C(=N/O)/N)N             | C04912395 | -15.8  | -4.08 | -18.4  | 6.31  | 0.37  |
| 1403 | c1c(cc(c1F)Cl)F                     | C16158244 | -15.8  | 0.46  | -18.03 | 3.39  | -1.62 |
| 1404 | c1cc(ncc1C#N)F                      | C19616136 | -15.8  | 0.19  | -18.48 | 4.76  | -2.28 |
| 1405 | c1c(cnc1)F[N+](=O)[O-]              | C21981786 | -15.8  | 0.21  | -16.04 | 2.61  | -2.58 |
| 1406 | c1c(c[nH]c1C=O)Br                   | C00337448 | -15.79 | -1.83 | -16.45 | 4.49  | -2    |
| 1407 | c1ccn2ccnc2c1                       | C00409233 | -15.79 | -2.27 | -16.46 | 6.78  | -3.84 |
| 1408 | c1ccc(c1)CN=C=S                     | C02168970 | -15.79 | -0.24 | -15.34 | 3.55  | -3.76 |
| 1409 | c1cc(ccc1[C@@H]2CO2)F               | C02584571 | -15.79 | -2.43 | -14.54 | 3.89  | -2.72 |
| 1410 | c1ccc(nc1)F                         | C02599022 | -15.79 | -0.67 | -16.12 | 3.07  | -2.07 |
| 1411 | COc(=O)Nc1cccc1F                    | C06126171 | -15.79 | -0.43 | -17.89 | 4.73  | -2.21 |
| 1412 | Cc1ccc(nc1)NN=O                     | C13212916 | -15.79 | -4.73 | -15.8  | 6.55  | -1.81 |
| 1413 | CCOC(=O)n1c(ncn1)N                  | C16980639 | -15.79 | -2.01 | -16.78 | 5.96  | -2.95 |
| 1414 | Oc1cccc(Cl)c1                       | W2002A002 | -15.79 | -1.02 | -15.91 | 2.74  | -1.61 |
| 1415 | C(c1nc(s1)Cl)Cl                     | C01574839 | -15.78 | -0.68 | -15.43 | 2.29  | -1.96 |
| 1416 | COc(=O)CNC(=O)C(F)(F)F              | C01726312 | -15.78 | -1.83 | -17.26 | 4.27  | -0.96 |
| 1417 | Cc1cnc(c1)N                         | C01757519 | -15.78 | -3.63 | -16.17 | 4.26  | -0.25 |
| 1418 | COc1cccnc1                          | C05329533 | -15.78 | -0.86 | -17.54 | 4.3   | -1.66 |
| 1419 | Cc1ccc(c1)N                         | C08294948 | -15.78 | -2.57 | -15.99 | 3.68  | -0.89 |
| 1420 | C[C@H](c1ccc(cc1)F)O                | C12506430 | -15.78 | -1.22 | -15.58 | 3.21  | -2.19 |
| 1421 | c1cnc(c(c1)F)F                      | C14982368 | -15.78 | -1.45 | -16.22 | 4.2   | -2.3  |
| 1422 | C(=C([N+](=O)[O-])[N+](=O)[O-])N)NN | C19333183 | -15.78 | -5.7  | -18.71 | 9.88  | -1.26 |
| 1423 | c1c(nc(c1)Br)C=O                    | C30678070 | -15.78 | -4.38 | -15.54 | 3.85  | 0.29  |
| 1424 | COc1cccc1                           | M1995A024 | -15.78 | -2.03 | -13.4  | 2.53  | -2.89 |
| 1425 | c1ccc2c(c1)OCO2                     | C00164507 | -15.77 | -1.63 | -16.28 | 4.36  | -2.23 |
| 1426 | c1cc(sc1C=O)Cl                      | C00165421 | -15.77 | -1    | -16.84 | 4.94  | -2.87 |
| 1427 | c1c(cnc1)NCl                        | C00166669 | -15.77 | -4.08 | -13.17 | 2.77  | -1.28 |
| 1428 | c1ccc(cc1)Oc2c(non2)N               | C01295948 | -15.77 | -0.39 | -19.99 | 5.91  | -1.3  |
| 1429 | CCOC(=O)[C@H](F)Cl                  | C02168354 | -15.77 | -0.63 | -15.71 | 3.49  | -2.91 |
| 1430 | c1c([nH]nc1O)C(F)(F)F               | C03073602 | -15.77 | -2.99 | -18.61 | 4.55  | 1.28  |
| 1431 | c1(nc(s1)N)N                        | C03896990 | -15.77 | -5.77 | -15.57 | 5.58  | -0.01 |
| 1432 | c1cc(sc1C(F)F)F                     | C05769898 | -15.77 | -2.81 | -15.61 | 2.97  | -0.31 |
| 1433 | C=C(C(=O)Cl)C(F)(F)F                | C21982551 | -15.77 | -1.65 | -15.22 | 3.58  | -2.48 |
| 1434 | c1cc(c(c1)F)O                       | C26896238 | -15.77 | -1.8  | -14.59 | 2.87  | -2.24 |
| 1435 | Cc1ccc(o1)C#N                       | C00403421 | -15.76 | -0.43 | -16.58 | 4.11  | -2.86 |
| 1436 | c1c(ncn1)N                          | C01593931 | -15.76 | -4.47 | -15.18 | 4.25  | -0.35 |

|      |                            |           |        |       |        |      |       |
|------|----------------------------|-----------|--------|-------|--------|------|-------|
| 1437 | Cc1ccc1                    | C01666987 | -15.76 | -1.4  | -14.45 | 2.55 | -2.46 |
| 1438 | Cc1ccc(cc1F)NN             | C02243288 | -15.76 | -1.26 | -15.59 | 3.09 | -2    |
| 1439 | C1C[C@H]2[C@H](CCC2=C1)O   | C02519601 | -15.76 | -0.71 | -15.87 | 2.88 | -2.05 |
| 1440 | c1cc(ncc1F)Br              | C02559898 | -15.76 | -1.04 | -17.06 | 2.57 | -0.23 |
| 1441 | c1c(ncnc1F)N               | C03098198 | -15.76 | -3.26 | -15.91 | 4.22 | -0.82 |
| 1442 | c1c(c(c(n1)F)C=O)F         | C04208906 | -15.76 | -1.79 | -16.67 | 4.63 | -1.93 |
| 1443 | C=C(CSC(=[NH2+])N)Cl       | C05606573 | -15.76 | -2.06 | -14.94 | 2.54 | -1.31 |
| 1444 | c1c(c(nc(nH+1)N)N)O        | C13829353 | -15.76 | -4.22 | -18.11 | 4.99 | 1.59  |
| 1445 | c1c(noc1C(F)F)C(F)F        | C16125565 | -15.76 | -0.66 | -13.93 | 2    | -3.16 |
| 1446 | c1cc(c(cc1O)F)Cl           | C00409351 | -15.75 | -0.54 | -16.97 | 3.34 | -1.57 |
| 1447 | C#Cc1ccc(c1)O              | C02149788 | -15.75 | -0.86 | -16.94 | 4.14 | -2.1  |
| 1448 | Cc1cnsc1                   | C02563976 | -15.75 | -1.82 | -15.3  | 3.21 | -1.83 |
| 1449 | c1c(c(c(c1F)F)C(=O)Cl)F    | C02585572 | -15.75 | 0.06  | -15.68 | 2.93 | -3.05 |
| 1450 | CCOn1ccnc1                 | C04023723 | -15.75 | -1.3  | -15.75 | 4.33 | -3.03 |
| 1451 | c1cc(cc(c1)F)OCC(=O)Cl     | C09245895 | -15.75 | -3.06 | -13.15 | 4.74 | -4.27 |
| 1452 | c1cc(oc1)CNC(=S)NN         | C13685440 | -15.75 | 0.03  | -18.69 | 3.8  | -0.89 |
| 1453 | c1cc2cn[nH]c2cc1F          | C14984745 | -15.75 | -0.43 | -16.92 | 4.01 | -2.42 |
| 1454 | C/C(=C)C([N+](=O)[O-])     | C16968746 | -15.75 | -1.4  | -16.22 | 5.46 | -3.61 |
| 1455 | C/[NH+]=C/c1ccccc1         | C18101893 | -15.75 | -1.43 | -14.48 | 2.86 | -2.69 |
| 1456 | c1cc(oc1C)Br               | C20077988 | -15.75 | -1.3  | -13.86 | 2.92 | -3.51 |
| 1457 | c1cc(nc(c1)F)CCl           | C21985780 | -15.75 | -0.35 | -17.52 | 5.14 | -3.02 |
| 1458 | c1csc(n1)CCl               | C22861495 | -15.75 | -0.27 | -16.63 | 3.53 | -2.38 |
| 1459 | COc1ccc(c1)F               | C00388393 | -15.74 | -0.19 | -15.22 | 2.59 | -2.92 |
| 1460 | c1cc(cc(c1)Cl)O            | C00404329 | -15.74 | -1.06 | -15.82 | 2.75 | -1.6  |
| 1461 | c1c(cnc1F)O                | C02384047 | -15.74 | -3.36 | -15.92 | 3.09 | 0.45  |
| 1462 | c1cc(c(nc1)Cl)F            | C02384113 | -15.74 | -2.45 | -15.25 | 4.4  | -2.44 |
| 1463 | c1c[nH+]ccc1/C(=N/O)/N     | C13130175 | -15.74 | -4.39 | -19.06 | 7.2  | 0.5   |
| 1464 | CC(=O)OCc1ccncc1           | C13232422 | -15.74 | -1.11 | -17.13 | 5.83 | -3.33 |
| 1465 | c1cc(oc1)C(=O)Nc2[n-]nnn2  | C13306638 | -15.74 | -1.4  | -19.41 | 6.96 | -1.9  |
| 1466 | c1cc(=O)occ1[N+](=O)[O-]   | C18810132 | -15.74 | -1.02 | -17.48 | 5.99 | -3.22 |
| 1467 | c1cnn(c1)C(=S)N            | C01393570 | -15.73 | -3.3  | -17.82 | 7.17 | -1.77 |
| 1468 | c1c(cc(c1F)F)O             | C02584330 | -15.73 | -4.15 | -14.2  | 3.95 | -1.32 |
| 1469 | c1c(c(nc(n1)F)N)F          | C03129093 | -15.73 | -3.46 | -16.43 | 3.48 | 0.68  |
| 1470 | C/C=C/n1ccccc1             | C05480262 | -15.73 | -1.89 | -14.2  | 2.52 | -2.15 |
| 1471 | CNC(=O)Nc1ccc(cc1F)F       | C12762527 | -15.73 | -0.39 | -18.76 | 5.2  | -1.77 |
| 1472 | COC(=O)C@H(C(=O)C(=O)OC)O  | C14496485 | -15.73 | -2.47 | -16.89 | 5.06 | -1.42 |
| 1473 | c1cc(ccc1NCC#N)F           | C20051929 | -15.73 | -2.54 | -16.53 | 6.36 | -3.03 |
| 1474 | c1cc(cc(c1F)F)NC(=[NH2+])N | C20857747 | -15.73 | 0.35  | -21.12 | 7.3  | -2.26 |
| 1475 | CC(=O)Oc1ccc(c(c1F)F)F     | C21986553 | -15.73 | 1.35  | -20.12 | 7.5  | -4.46 |
| 1476 | c1c(nc[nH]1)CC(F)F         | C30714975 | -15.73 | -3.54 | -15    | 5.7  | -2.88 |
| 1477 | c1cc2cn[nH]c2c(c1)N        | C00112557 | -15.72 | -3.4  | -15.83 | 4.31 | -0.8  |
| 1478 | CC(=O)OCc1ccc1             | C00388413 | -15.72 | -0.33 | -17.72 | 5.63 | -3.3  |
| 1479 | CSC(=[NH2+])NCC=C          | C04276941 | -15.72 | -1.21 | -14.94 | 2.43 | -2.01 |
| 1480 | c1cc(sc1)C(=O)N=C=O        | C19408027 | -15.72 | 1.28  | -20.66 | 3.83 | -0.18 |
| 1481 | CCc1cnccn1                 | C04262348 | -15.71 | -1.41 | -16.18 | 3.64 | -1.77 |
| 1482 | C(#N)NC#N                  | C05225679 | -15.71 | -5.48 | -10.07 | 4.81 | -4.97 |
| 1483 | Cc1cc(sn1)Br               | C15042087 | -15.71 | -0.3  | -15.08 | 2.25 | -2.59 |
| 1484 | C=CC/C(=[NH+])N/N          | C15937651 | -15.71 | -3.64 | -14.93 | 3.16 | -0.31 |
| 1485 | c1ccc2c(c1)cc([nH]2)S      | C18032180 | -15.71 | -1.17 | -13.61 | 2.49 | -3.41 |
| 1486 | c1cc(cc(c1)O)N             | C00157527 | -15.7  | -3.26 | -16.34 | 3.42 | 0.46  |
| 1487 | CCc1cc[nH]c1               | C01561739 | -15.7  | -1.81 | -15.7  | 2.45 | -0.64 |
| 1488 | c1cc(c(cc1CC#N)F)N         | C02243166 | -15.7  | -2.37 | -17.73 | 7.1  | -2.7  |
| 1489 | Cc1ccc(cc1F)C#N            | C02526234 | -15.7  | -0.96 | -15.92 | 3.9  | -2.73 |
| 1490 | CO/C=C/c1ccccc1            | C02567999 | -15.7  | 0.59  | -17.77 | 3.01 | -1.52 |
| 1491 | c1cc(oc1)c2cc(no2)C=O      | C05177628 | -15.7  | -0.03 | -18.3  | 5.36 | -2.74 |
| 1492 | c1c(c([nH]1)N)N+([O-])[O-] | C08101022 | -15.7  | -5.42 | -16.19 | 6.27 | -0.37 |
| 1493 | C/C(=C)C/COC               | C16970512 | -15.7  | -1.23 | -13.71 | 1.67 | -2.44 |
| 1494 | Cc1ccc(c(n1)N)N+([O-])[O-] | C19798352 | -15.7  | -2.53 | -16.52 | 5.35 | -2.01 |
| 1495 | c1csc(n1)N=C=S             | C20153799 | -15.7  | -0.44 | -16.44 | 3.94 | -2.76 |
| 1496 | c1ccc(cc1)CON              | C00155377 | -15.69 | 1.53  | -18.51 | 3.09 | -1.8  |
| 1497 | c1cnc(nc1[N+](=O)[O-])N    | C01574113 | -15.69 | -3.43 | -16.55 | 7.02 | -2.73 |
| 1498 | c1cc(cnc1)F                | C01680674 | -15.69 | -1.8  | -14.6  | 2.85 | -2.13 |
| 1499 | c1cc(oc1)C(=O)Cl           | C01846582 | -15.69 | -2.35 | -16.11 | 5.35 | -2.58 |
| 1500 | c1ccc(cc1)/C=N/O           | C04528806 | -15.69 | -2.73 | -16.44 | 5.1  | -1.62 |
| 1501 | CCc1ccccc1                 | C08294957 | -15.69 | -0.89 | -13.85 | 2.85 | -3.8  |
| 1502 | c1c(cnc1N)N                | C13230016 | -15.69 | -4.05 | -16.86 | 4.09 | 1.13  |
| 1503 | CNc1c(c[nH]1)N+([O-])[O-]  | C04002765 | -15.68 | -3.23 | -17.11 | 5.97 | -1.31 |
| 1504 | CCC(=O)CC(=O)C             | C04877757 | -15.68 | -1.53 | -15.33 | 3.56 | -2.39 |
| 1505 | c1c[nH]cc(c1=O)Br          | C08698540 | -15.68 | -2.98 | -15.82 | 3.51 | -0.38 |
| 1506 | c1ccc(cc1)[C@H](C#C)C(F)F  | C15774485 | -15.68 | -0.73 | -16.09 | 4.73 | -3.6  |
| 1507 | c1ccc1N=C=O                | C19507274 | -15.68 | 0.05  | -18.07 | 2.96 | -0.62 |
| 1508 | c1cnc(cc1[N+](=O)[O-])N    | C19851305 | -15.68 | -4.01 | -15.75 | 5.67 | -1.59 |
| 1509 | c1cc2c(cc1N)CC2            | C22013192 | -15.68 | -1.95 | -14.71 | 3.66 | -2.68 |
| 1510 | c1ccc(cc1)NN=C(C#N)C#N     | C00039770 | -15.67 | -1.88 | -15.5  | 3.76 | -2.05 |
| 1511 | c1ccc2c(c1)cc(o2)C#N       | C00122171 | -15.67 | -1.59 | -16.26 | 4.37 | -2.2  |
| 1512 | c1cc(c(cc1F)F)O            | C00164410 | -15.67 | -2.38 | -15.26 | 3.28 | -1.31 |
| 1513 | c1cc(ncc1N)F               | C00335086 | -15.67 | -3.11 | -17.09 | 4.94 | -0.42 |
| 1514 | CCOc1cnsc1                 | C01391701 | -15.67 | -0.76 | -17.2  | 3.34 | -1.04 |
| 1515 | c1c(cnc(n1)Cl)Br           | C01529074 | -15.67 | 0.84  | -16.59 | 2.45 | -2.38 |
| 1516 | COC(=O)C(F)F               | C02003941 | -15.67 | -1.48 | -13.71 | 1.85 | -2.33 |
| 1517 | c1c(c(nc(c1F)N)N)F         | C02529882 | -15.67 | -2.9  | -17.15 | 2.8  | 1.58  |
| 1518 | c1c[nH]nc1C(F)F            | C04243565 | -15.67 | -1.3  | -15.53 | 2.67 | -1.51 |
| 1519 | c1cnc(cc1F)Br              | C14982262 | -15.67 | -0.69 | -15.07 | 2.63 | -2.54 |
| 1520 | c1ccc(cc1)C(=O)N=[N+]=[N-] | C15784780 | -15.67 | 2     | -20.66 | 3.55 | -0.57 |
| 1521 | c1cnn(c1)C#N               | C22016511 | -15.67 | -2.17 | -14.55 | 5.22 | -4.17 |
| 1522 | c1c(cc(c1O)Cl)F            | C00389677 | -15.66 | -0.54 | -17.34 | 2.67 | -0.44 |
| 1523 | c1cc(ccc1C#N)N+([O-])[O-]  | C01680884 | -15.66 | -1.78 | -15.53 | 5.74 | -4.09 |
| 1524 | c1nc(c(c1)F)N              | C01693119 | -15.66 | -4.81 | -16.38 | 4.96 | 0.57  |
| 1525 | c1ccc(cc1)CCN=C=S          | C02022074 | -15.66 | -1.89 | -16.06 | 1.77 | 0.52  |
| 1526 | c1ccn2c(c1)[nH]c2=O        | C02654018 | -15.66 | -4.92 | -17.34 | 8.65 | -2.05 |



|      |                                |           |        |       |        |      |       |
|------|--------------------------------|-----------|--------|-------|--------|------|-------|
| 1527 | Cc1cc(sn1)Cl                   | C15042084 | -15.66 | -0.18 | -15.18 | 2.17 | -2.47 |
| 1528 | c1(n[nH]c(=O)s1)N              | C17173601 | -15.66 | -6.43 | -14.78 | 4.22 | 1.33  |
| 1529 | c1ccc(cc1N)N)O                 | C00388490 | -15.65 | -3.46 | -17.7  | 3.54 | 1.96  |
| 1530 | Cc1ccc(cc1)OCC=O               | C02559106 | -15.65 | -0.52 | -18.73 | 4.84 | -1.24 |
| 1531 | CC(=O)O/N=C/C(=O)C(=O)N)N      | C04529889 | -15.65 | -1.19 | -20.42 | 7.31 | -1.36 |
| 1532 | c1c2cn[nH]c2nc(n1)N            | C13362452 | -15.65 | -3.3  | -17.53 | 6.36 | -1.17 |
| 1533 | c1cnccc1CC=O                   | C13551730 | -15.65 | -2.96 | -16.51 | 6.09 | -2.27 |
| 1534 | c1cc(=O)ccc1C(=O)Cl            | C16124716 | -15.65 | 0.55  | -19.16 | 5.92 | -2.96 |
| 1535 | c1cc(ccc1N)I                   | C00013615 | -15.64 | -0.55 | -14.41 | 1.93 | -2.61 |
| 1536 | c1c(c(c(c1Br)N)F)F             | C00056705 | -15.64 | -3.29 | -13.97 | 2.2  | -0.58 |
| 1537 | c1cc(cc(c1)F)N=C=S             | C00167163 | -15.64 | -2.15 | -12.16 | 2.69 | -4.01 |
| 1538 | c1csc(n1)Br                    | C01592420 | -15.64 | -1.8  | -15.09 | 3.06 | -1.8  |
| 1539 | c1nc([nH]n1)SCC#N              | C05373230 | -15.64 | -4.07 | -17.55 | 5.86 | 0.12  |
| 1540 | Cn1ccnc1N                      | C13354637 | -15.64 | -3.24 | -15.66 | 5.55 | -2.29 |
| 1541 | c1cnc(cn1)/N=N/O               | C16940934 | -15.64 | -1.75 | -19.43 | 5.59 | -0.05 |
| 1542 | c1ccc(c(c1)/C=C/C(=O)F         | C21304314 | -15.64 | -1.27 | -15.62 | 5.42 | -4.16 |
| 1543 | c1c(c(cc(c1F)F)Br)O            | C00389788 | -15.63 | -1.09 | -17.22 | 2.69 | 0     |
| 1544 | c1c(c(cc(c1N)F)F)N             | C01598771 | -15.63 | -2.94 | -15.68 | 3.22 | -0.24 |
| 1545 | c1ccc(c(c1)/C=C/[N+](=O)[O-])O | C01688684 | -15.63 | 0.13  | -21.48 | 6.19 | -0.47 |
| 1546 | Cc1nnc(s1)N                    | C08615005 | -15.63 | -3    | -15.49 | 3.51 | -0.65 |
| 1547 | c1cc(ncc1C(F)F)NN=O            | C13213559 | -15.63 | -0.66 | -19.04 | 6.05 | -1.98 |
| 1548 | c1cncc2c1[nH]cc2N              | C14985667 | -15.63 | -3.1  | -16.78 | 4.79 | -0.53 |
| 1549 | C1(=C(C(C1=O)(F)F)F)F          | C16159297 | -15.63 | -0.01 | -14.79 | 1.38 | -2.2  |
| 1550 | c1ccc2c(c1)C=O                 | C21985379 | -15.63 | -0.67 | -16.63 | 3.28 | -1.6  |
| 1551 | c1c(cnc2c1nc([nH]2)Cl)N        | C00217087 | -15.62 | -3.94 | -16.33 | 5.58 | -0.93 |
| 1552 | c1cc(cc(c1)O)N=C=S             | C00336175 | -15.62 | -0.82 | -19.91 | 3.89 | 1.22  |
| 1553 | c1cc(c(c(c1C#N)F)F)F           | C00389524 | -15.62 | -1.26 | -16.73 | 5.93 | -3.55 |
| 1554 | CCOc1ccc(cc1)F                 | C00393902 | -15.62 | -1.93 | -14.51 | 2.36 | -1.54 |
| 1555 | Cc1ccc(cc1O)N                  | C00394645 | -15.62 | -2.47 | -16.27 | 3.31 | -0.19 |
| 1556 | Cc1cccc(c1)O                   | C00897141 | -15.62 | -1.58 | -15.27 | 2.86 | -1.63 |
| 1557 | C(#N)c1c(non1)N                | C01063089 | -15.62 | -4.43 | -13.88 | 3.03 | -0.34 |
| 1558 | [H]/N=C1/CSC(=N1)N             | C12359944 | -15.62 | -5.16 | -15.57 | 5.21 | -0.1  |
| 1559 | c1ccc(cc1)OCCO                 | G2008A005 | -15.62 | -3.19 | -16.19 | 4.81 | -1.06 |
| 1560 | Oc1ccc(F)cc1F                  | W2002A006 | -15.62 | -2.37 | -15.23 | 3.28 | -1.31 |
| 1561 | c1cc2n(c1)CC=C2                | C01570201 | -15.61 | -1.78 | -17.35 | 4.07 | -0.55 |
| 1562 | c1c(cnc(c1)Br)O                | C02566952 | -15.61 | -0.78 | -17.39 | 2.93 | -0.38 |
| 1563 | c1cc(c(c(c1CS)F)F              | C04244664 | -15.61 | -0.9  | -16.85 | 3.6  | -1.45 |
| 1564 | c1c(ncs1)C(=O)Cl               | C16124686 | -15.61 | -2.67 | -16.28 | 4.88 | -1.54 |
| 1565 | c1c(cc(nc1F)Br)F               | C21987574 | -15.61 | 0.53  | -15.69 | 2.1  | -2.56 |
| 1566 | CCc1cccc1                      | M1995A012 | -15.61 | -0.38 | -14.6  | 2.41 | -3.05 |
| 1567 | c1cc(ccc1NN)Br                 | C00088596 | -15.6  | -1.88 | -14.5  | 2.69 | -1.91 |
| 1568 | c1cc(oc1C(=O)N)Br              | C01664804 | -15.6  | -3.34 | -16.26 | 4.07 | -0.07 |
| 1569 | CC(=O)c1cnns1                  | C12650588 | -15.6  | -2.56 | -16.85 | 5.03 | -1.22 |
| 1570 | c1cc(ccc1C=O)F)F               | C00164803 | -15.59 | -3.23 | -14.05 | 4.9  | -3.21 |
| 1571 | c1cc(ccc1O)cc2cnns2)F          | C01388230 | -15.59 | -0.74 | -17.4  | 3.58 | -1.03 |
| 1572 | CC/C=C/OCC=C                   | C01653150 | -15.59 | -0.85 | -14.69 | 1.83 | -1.87 |
| 1573 | c1c(nns1)C(=O)Cl               | C02513224 | -15.59 | -2.76 | -15.98 | 4.16 | -1    |
| 1574 | CCNc1cnccn1                    | C21511135 | -15.59 | -0.5  | -17.93 | 4.08 | -1.23 |
| 1575 | COc1cccc1                      | C00389547 | -15.58 | -1.75 | -14.07 | 2.47 | -2.23 |
| 1576 | c1cc(nnc1[N+](=O)[O-])Cl       | C00967197 | -15.58 | -1.61 | -21.54 | 9.95 | -2.38 |
| 1577 | c1cc(ccc1[N+](=O)[O-])Cl       | C03860273 | -15.58 | -1.5  | -13.39 | 3.53 | -4.22 |
| 1578 | c1c(c(n[nH]1)N)Cl              | C04244022 | -15.58 | -3.19 | -16.09 | 3.95 | -0.25 |
| 1579 | C(=O)C(C(F)F)F)F)Cl            | C05178388 | -15.58 | -0.1  | -13.82 | 0.66 | -2.33 |
| 1580 | Cn1cncc1[N+](=O)[O-]           | C08294935 | -15.58 | -1.74 | -15.99 | 6.11 | -3.96 |
| 1581 | c1c(cncn1)C#N                  | C08698486 | -15.58 | 0.75  | -18.26 | 4.11 | -2.18 |
| 1582 | c1cncc1Br                      | C30677654 | -15.58 | -1.98 | -15.72 | 3.98 | -1.87 |
| 1583 | CC(=O)Oc1ccnc1                 | C00388199 | -15.57 | -0.01 | -18.72 | 6.19 | -3.03 |
| 1584 | c1ccc(cc1)CO                   | C00895302 | -15.57 | -0.96 | -17.53 | 4.19 | -1.27 |
| 1585 | [H]/N=C(/c1cnccn1)\OC          | C05320081 | -15.57 | -2.04 | -20.29 | 5.23 | 1.53  |
| 1586 | c1cnc(cn1)/C(=[NH+])N)N        | C06244369 | -15.57 | -4.5  | -19.97 | 4.87 | 4.02  |
| 1587 | C(=O)C(C(F)F)F                 | C16159156 | -15.57 | -0.59 | -14.03 | 1.09 | -2.05 |
| 1588 | c1cc(ccc1S)F)N                 | C20247140 | -15.57 | -1.07 | -16.33 | 3.71 | -1.88 |
| 1589 | c1c(nc(c1Cl)F)Br               | C21981946 | -15.57 | -1.15 | -13.52 | 1.96 | -2.86 |
| 1590 | c1c(nc(nc1)Cl)N                | C01101988 | -15.56 | -1.62 | -17.65 | 3.89 | -0.17 |
| 1591 | c1ccc(cc1)/C=C/C=O             | C01532777 | -15.56 | -3.28 | -14.09 | 5.91 | -4.1  |
| 1592 | Cc1cnc(nc1F)F                  | C01582389 | -15.56 | -2.42 | -16.11 | 4.87 | -1.9  |
| 1593 | Cc1cc(no1)C(=O)Cl              | C02159744 | -15.56 | -1    | -16.02 | 3.79 | -2.34 |
| 1594 | c1cc(ccc1C#N)N)Cl              | C02566106 | -15.56 | -0.94 | -15.49 | 3.37 | -2.51 |
| 1595 | c1cncc(c1[N+](=O)[O-])[O-]     | C14982956 | -15.56 | -2.91 | -17.22 | 5.65 | -1.08 |
| 1596 | c1cc(sc1)C=O                   | C00158751 | -15.55 | -1.35 | -16.2  | 4.43 | -2.43 |
| 1597 | c1c(ccc1Br)N                   | C00331807 | -15.55 | -0.94 | -16.57 | 2.92 | -0.96 |
| 1598 | C#Cc1ccc(cc1)[N+](=O)[O-]      | C01433114 | -15.55 | -0.86 | -14.8  | 4.84 | -4.73 |
| 1599 | c1cc(ccc1F)N+](=O)[O-]         | C01690401 | -15.55 | -2.38 | -14.23 | 4.97 | -3.91 |
| 1600 | CNC(=O)n1cncc1                 | C01727047 | -15.55 | -4.12 | -14.92 | 5.24 | -1.75 |
| 1601 | c1cc(ccc1Cl)O)N                | C02389348 | -15.55 | -3.93 | -14.67 | 3.08 | -0.02 |
| 1602 | c1nc(c2c(n[nH]c2n1)C#N)N       | C03852596 | -15.55 | -1.96 | -16.66 | 4.08 | -1    |
| 1603 | [H]/N=C1/N=C(CS1)[S-]          | C08628604 | -15.55 | -3.09 | -14.2  | 3.15 | -1.42 |
| 1604 | c1c(ncs1)CCCl                  | C19092526 | -15.55 | 0.78  | -16.42 | 2.98 | -2.9  |
| 1605 | CC(=O)c1cnccn1                 | C26899027 | -15.55 | -0.04 | -18.88 | 5.57 | -2.21 |
| 1606 | c1cc(nc(c1)F)NCC(=O)C(F)F)F    | C01392500 | -15.54 | -1.44 | -17.34 | 5.32 | -2.09 |
| 1607 | c1csc(n1)Cl                    | C01676248 | -15.54 | -1.91 | -14.98 | 3.06 | -1.71 |
| 1608 | c1c(c(cc(c1F)O)F)N             | C02243352 | -15.54 | -4.52 | -14.78 | 3.47 | 0.3   |
| 1609 | c1c(c(nc(n1)Br)N)C#N           | C02555749 | -15.54 | -4.27 | -13.79 | 3.76 | -1.23 |
| 1610 | c1cc(ccc1NC(=S)C#N)F           | C06512096 | -15.54 | -4.5  | -15.03 | 7.73 | -3.73 |
| 1611 | c1cc(ncc1C=O)F                 | C08698168 | -15.54 | -2.73 | -16.87 | 5.82 | -1.76 |
| 1612 | c1cnc2c(n1)[nH]c(=S)[nH]2      | C13283495 | -15.54 | -3.55 | -19.01 | 8.43 | -1.4  |
| 1613 | c1(c(c(nc(c1Cl)F)F)F)O         | C16082820 | -15.54 | -1.89 | -16.18 | 2.75 | -0.22 |
| 1614 | c1cc(ccc1F)OCC#N               | C19425892 | -15.54 | -3.71 | -14.27 | 5.89 | -3.45 |
| 1615 | c1cc(ccc1CNC(=O)N)F            | C00103941 | -15.53 | -0.19 | -21.57 | 6.69 | -0.46 |
| 1616 | COc1cnccn1                     | C00334489 | -15.53 | -1.91 | -17.11 | 3.6  | -0.11 |

|      |                                 |           |        |       |        |      |       |
|------|---------------------------------|-----------|--------|-------|--------|------|-------|
| 1617 | C=CCOC(=O)C=C                   | C01577261 | -15.53 | -0.47 | -15.9  | 4.03 | -3.19 |
| 1618 | C[C@H](c1cccc(c1)F)O            | C02560497 | -15.53 | -0.95 | -15.39 | 3    | -2.19 |
| 1619 | c1cncc(c1C=O)F                  | C04208893 | -15.53 | -1.16 | -16.17 | 3.66 | -1.86 |
| 1620 | c1ccc2c(c1)CCO2                 | C06661321 | -15.53 | -1.27 | -14.35 | 3.29 | -3.19 |
| 1621 | c1cc([nH]c1)/C=N/O              | C08618515 | -15.53 | -3.58 | -17.3  | 5.63 | -0.28 |
| 1622 | Cc1c[nH]ccc1=O                  | C14982930 | -15.53 | -2.22 | -16.42 | 3.65 | -0.54 |
| 1623 | [H]/N=C(\C)/Oc1cccc1            | C16978057 | -15.53 | 0.58  | -18.62 | 3.9  | -1.38 |
| 1624 | C1c2c(n[nH]c2N)CS1              | C26506273 | -15.53 | -4.17 | -17.29 | 6.96 | -1.02 |
| 1625 | c1cc(c2c(c1)non2)N              | C00158119 | -15.52 | -2.53 | -16.71 | 4.65 | -0.93 |
| 1626 | c1c(cc(c1F)O)F                  | C00389659 | -15.52 | -0.01 | -16.71 | 2.59 | -1.39 |
| 1627 | CC(=O)c1cccnc1                  | C01587582 | -15.52 | 0.57  | -18.73 | 4.97 | -2.33 |
| 1628 | c1ccc(cc1)OCF                   | C01765109 | -15.52 | -2.48 | -15.12 | 3.47 | -1.39 |
| 1629 | CCc1cccc1                       | C02037726 | -15.52 | -0.37 | -14.52 | 2.42 | -3.05 |
| 1630 | CSc1nnc(n1N)C(F)F               | C02536954 | -15.52 | -3.31 | -16.25 | 6.56 | -2.51 |
| 1631 | c1cc(c(c1F)CS)F                 | C04244663 | -15.52 | 0.4   | -17.53 | 2.94 | -1.33 |
| 1632 | Cc1ccc(cc1)C                    | M1995A036 | -15.52 | -1.01 | -11.63 | 1.5  | -4.38 |
| 1633 | Cc1cc(ccc1N)O                   | C00388268 | -15.51 | -4.39 | -14.39 | 3.44 | -0.17 |
| 1634 | c1cc(ncc1Br)F                   | C00403389 | -15.51 | -0.75 | -17.35 | 2.78 | -0.18 |
| 1635 | c1cc(c(cc1F)C#N)F               | C00407108 | -15.51 | 1.74  | -17.97 | 4.38 | -3.66 |
| 1636 | c1c(c[nH]c1)Cl                  | C01049758 | -15.51 | -3.23 | -14.48 | 3.4  | -1.2  |
| 1637 | C=COc(=O)Cl                     | C02242591 | -15.51 | -0.33 | -14.89 | 1.92 | -2.21 |
| 1638 | c1cncc(c1[N+](=O)[O-])F         | C02526725 | -15.51 | -2.69 | -17.05 | 5.44 | -1.21 |
| 1639 | c1c(cc(c1F)C=O)F                | C04290144 | -15.51 | -1.31 | -15.42 | 3.99 | -2.76 |
| 1640 | CCC(=O)C=C/C                    | C12359419 | -15.51 | -1.24 | -14.38 | 3.35 | -3.24 |
| 1641 | c1(c(c(c(nc1F)F)F)Cl)F          | C16159839 | -15.51 | 0     | -13.81 | 0.59 | -2.29 |
| 1642 | C#CCSc1nc([nH]c1)N              | C17045223 | -15.51 | -2.76 | -16.92 | 7.48 | -3.32 |
| 1643 | c1cnn2c1nnc(c2N)C#N             | C00250355 | -15.5  | -4.53 | -16.1  | 6.4  | -1.27 |
| 1644 | c1cc(c(cc1N))N                  | C00334515 | -15.5  | -3.72 | -12.82 | 2.17 | -1.13 |
| 1645 | c1cc(cc1C(=O)N)N+([=O])[O-]     | C01042801 | -15.5  | -5.77 | -15.63 | 5.69 | 0.21  |
| 1646 | c1cc(cc1C(=O)N)N=C=S            | C02528075 | -15.5  | -1.25 | -19.14 | 6.5  | -1.61 |
| 1647 | c1cc(c(c1F)N)F                  | C12359240 | -15.5  | -1.65 | -15.71 | 2.24 | -0.37 |
| 1648 | c1c(c(=O)[nH]c(n1)N)Br          | C16698778 | -15.5  | -2.4  | -18.39 | 4.22 | 1.07  |
| 1649 | c1cc(c(cc1O)Br)N                | C19872883 | -15.5  | -3.95 | -16.17 | 4.72 | -0.1  |
| 1650 | c1c(nc(c(n1)Br)N)Cl             | C32915138 | -15.5  | -4.75 | -13.66 | 3.47 | -0.56 |
| 1651 | c1ccn(c1)C(=O)N                 | C01674962 | -15.49 | -2.74 | -18.17 | 6.36 | -0.94 |
| 1652 | Cc1ccc(c(c1F)NN                 | C02546166 | -15.49 | -0.13 | -16.65 | 3.33 | -2.04 |
| 1653 | c1cc(cnc1)CNC=O                 | C08701028 | -15.49 | 0.76  | -22.46 | 6.97 | -0.77 |
| 1654 | c1ccn(c1)CCBr                   | C12360598 | -15.49 | 0.42  | -14.81 | 2.73 | -3.82 |
| 1655 | C#Cc1cccoc1                     | C12957855 | -15.49 | -1.1  | -15.65 | 4.06 | -2.79 |
| 1656 | Cc1cc(nc1)CBr                   | C00158681 | -15.48 | -1.11 | -15.17 | 3.91 | -3.1  |
| 1657 | c1cnc(nc1)N                     | C00967472 | -15.48 | -2.68 | -15.79 | 4.44 | -1.46 |
| 1658 | c1ccnc(c1)SC(=NH2+)N            | C01615476 | -15.48 | -0.68 | -18.25 | 4.95 | -1.5  |
| 1659 | c1cnoc1CCl                      | C04200425 | -15.48 | -1.42 | -15.65 | 4.12 | -2.53 |
| 1660 | c1cn(cn1)CCO                    | C08294942 | -15.48 | -3.36 | -16.58 | 5.22 | -0.76 |
| 1661 | c1c(ccc1F)C=O                   | C08698169 | -15.48 | -2.69 | -16.59 | 5.67 | -1.86 |
| 1662 | CCOCn1ccnc1                     | C16677898 | -15.48 | -1.62 | -16.96 | 5.72 | -2.61 |
| 1663 | CNC(=O)c1c(nsn1)N               | C17163636 | -15.48 | -3.68 | -17.49 | 4.12 | 1.57  |
| 1664 | C1CCC=CC1                       | M1995A013 | -15.48 | -0.23 | -12.16 | 0.4  | -3.49 |
| 1665 | Cc1cc(nc1)CCl                   | C00166026 | -15.47 | -1.09 | -15.5  | 4.13 | -3.02 |
| 1666 | Cc1cc(ccc1O)F                   | C00389593 | -15.47 | -0.75 | -15.69 | 2.8  | -1.83 |
| 1667 | c1c(c(=O)[nH]c(=O)[nH]1)CCl     | C01670523 | -15.47 | -3.09 | -19.09 | 6.51 | 0.21  |
| 1668 | c1c(cc(=O)O)Cl                  | C01760795 | -15.47 | -1.91 | -15.95 | 4.82 | -2.43 |
| 1669 | c1c(ncs1)C=O                    | C02566818 | -15.47 | -2.45 | -16.75 | 4.73 | -1    |
| 1670 | c1(c(c(c(c1F)F)F)[N+](=O)[O-])N | C05510640 | -15.47 | -2.97 | -12.37 | 2.48 | -2.61 |
| 1671 | CCSc1[nH]nnc1                   | C05654998 | -15.47 | -2.76 | -13.41 | 3.62 | -2.93 |
| 1672 | CCc1cnc(s1)N                    | C12481760 | -15.47 | -1.32 | -15.99 | 3.68 | -1.84 |
| 1673 | c1cnc(c(c1F)O)N                 | C21981850 | -15.47 | -4.97 | -16.32 | 4.86 | 0.95  |
| 1674 | Oc1ccccc1                       | phenol    | -15.47 | -2.03 | -15.02 | 2.77 | -1.2  |
| 1675 | COC(=O)c1c(ncn1)N               | C00108965 | -15.46 | -3.45 | -17.33 | 5.82 | -0.49 |
| 1676 | c1cc(ccc1C(=O)ON)[N+](=O)[O-]   | C01732516 | -15.46 | -2.1  | -15.96 | 5.91 | -3.31 |
| 1677 | c1cc2c(cc1F)[nH]c(=S)[nH]2      | C09927090 | -15.46 | -3.32 | -13.44 | 3.97 | -2.67 |
| 1678 | c1cc(cnc1)NC(=O)N               | C13538945 | -15.46 | -2.93 | -20.72 | 7.38 | 0.82  |
| 1679 | Cc1cc([nH]c1)Cl                 | C17058591 | -15.46 | -1.44 | -15.18 | 2.73 | -1.57 |
| 1680 | c1c[nH]c(c1N)N                  | C19075780 | -15.46 | -4.38 | -16.32 | 4.13 | 1.1   |
| 1681 | c1cncc(c1N)[N+](=O)[O-]         | C19798391 | -15.46 | -2.29 | -18.08 | 5.86 | -0.94 |
| 1682 | c1cn(cn1)CCS                    | C20437221 | -15.46 | -0.86 | -15.8  | 4.84 | -3.63 |
| 1683 | c1c(snn1)[S-]                   | C22016682 | -15.46 | -1.67 | -16.07 | 3.1  | -0.82 |
| 1684 | COC(=O)c1ccc(c(c1N)F)F          | C31829484 | -15.46 | -3.29 | -13.64 | 3.89 | -2.43 |
| 1685 | CCSCC=C                         | M1995A005 | -15.46 | -0.02 | -13.17 | 1.33 | -3.6  |
| 1686 | C1CS[P@](O1)OCC(F)(F)F          | C05459485 | -15.45 | 0.65  | -16.03 | 6.56 | -6.63 |
| 1687 | CNc1c(non1)[O-]                 | C05699251 | -15.45 | -3.03 | -17.76 | 4.22 | 1.12  |
| 1688 | CCNc1nccs1                      | C20556872 | -15.45 | -1.75 | -15.82 | 4.22 | -2.09 |
| 1689 | c1ccn(c1)CC#N                   | C00164491 | -15.44 | -1.42 | -19.03 | 7.98 | -2.96 |
| 1690 | c1ccc2c(c1)CC2=O                | C00897152 | -15.44 | -1.27 | -14.09 | 3.9  | -3.98 |
| 1691 | Cc1c(non1)[N+](=O)[O-]          | C01295932 | -15.44 | -0.15 | -16.25 | 3.13 | -2.18 |
| 1692 | c1cc(ncc1C(F)(F)F)C#N           | C01463603 | -15.44 | -2.15 | -14.9  | 4.65 | -3.03 |
| 1693 | C(#N)/C(=C(\C#N)\Cl)/F          | C01606791 | -15.44 | -0.57 | -13.97 | 2.67 | -3.26 |
| 1694 | CCSCC=C                         | C02166476 | -15.44 | -0.04 | -13.13 | 1.33 | -3.59 |
| 1695 | CSc1cccc(c1)F                   | C02511053 | -15.44 | -0.2  | -16.35 | 2.34 | -1.22 |
| 1696 | Cc1ccc(c(c1)N)C                 | C03860836 | -15.44 | -3.27 | -11.47 | 2.14 | -2.84 |
| 1697 | CN(c1cnccn1)N                   | C04038296 | -15.44 | -1.96 | -17.05 | 4.42 | -0.85 |
| 1698 | c1c(non1)c2nnnn2O               | C04728868 | -15.44 | -3.12 | -18.2  | 4.77 | 1.12  |
| 1699 | c1cc(ccc1N=C(N)N)Cl             | C05003398 | -15.44 | 0.69  | -18.02 | 4.51 | -2.63 |
| 1700 | c1ccc(cc1)Nc2cn[nH]n2           | C05072484 | -15.44 | -1.1  | -16.03 | 3.8  | -2.1  |
| 1701 | c1[nH]c(c(n1)C(=O)N)N=[N+]=[N-] | C16952133 | -15.44 | -3.98 | -20.94 | 7.78 | 1.71  |
| 1702 | c1cc2c([nH]c(n2)N)nc1           | C17060146 | -15.44 | -4.86 | -17.59 | 9.21 | -2.2  |
| 1703 | c1c(snn1)/C=N/O                 | C17129871 | -15.44 | -5.06 | -17.99 | 6.72 | 0.88  |
| 1704 | c1c(cc(c1F)F)F                  | C00404224 | -15.43 | -3.2  | -14.77 | 4.45 | -1.92 |
| 1705 | Cc1ccc(cn1)Br                   | C00966674 | -15.43 | -0.23 | -14.69 | 2.53 | -3.04 |
| 1706 | c1ccc(cc1)OCCO                  | C01577061 | -15.43 | -3    | -16.16 | 4.8  | -1.08 |

|      |                                     |           |        |       |        |      |       |
|------|-------------------------------------|-----------|--------|-------|--------|------|-------|
| 1707 | C#CCn1ccc(n1)C(F)F                  | C02556148 | -15.43 | -3.09 | -15.68 | 7    | -3.65 |
| 1708 | Cc1cc(cnc1)F                        | C02598989 | -15.43 | -1.85 | -13.59 | 2.62 | -2.62 |
| 1709 | c1c(c[nH+]cc1[O-])[N+](=O)[O-]      | C14982959 | -15.43 | -4.47 | -15.78 | 5.17 | -0.35 |
| 1710 | c1cc(oc1CBr)[N+](=O)[O-]            | C00120684 | -15.42 | -1.44 | -16.88 | 6.43 | -3.53 |
| 1711 | c1cc(c(c1)F)F)CO                    | C00409277 | -15.42 | -1.67 | -16.18 | 3.88 | -1.46 |
| 1712 | COc1ccccc1                          | C00897131 | -15.42 | -1.77 | -13.3  | 2.54 | -2.89 |
| 1713 | Cc1ccoc1                            | C01580392 | -15.42 | -1.11 | -14.42 | 2.46 | -2.35 |
| 1714 | c1cc(ccc1N)NCC#N                    | C01848391 | -15.42 | -2.97 | -16.28 | 5.19 | -1.35 |
| 1715 | C/C=C/C=C#N                         | C02584527 | -15.42 | -0.93 | -14.78 | 3.88 | -3.59 |
| 1716 | CSSSC                               | C04097550 | -15.42 | -0.87 | -11.77 | 1.82 | -4.6  |
| 1717 | CC(=O)/C=C/(c1ccccc1)N              | C06262272 | -15.42 | -1.68 | -15.31 | 4.9  | -3.32 |
| 1718 | c1csc(n1)NC(=[NH2+])N=C(N)N         | C20459028 | -15.42 | -2.23 | -19.44 | 9.42 | -3.16 |
| 1719 | CCOC(=O)C=[N+]=[N-]                 | C04521365 | -15.41 | -1.74 | -15.97 | 4.05 | -1.74 |
| 1720 | Cc1nc(cs1)C(=O)Cl                   | C12370153 | -15.41 | -2.16 | -15.58 | 4.48 | -2.15 |
| 1721 | c1cncc(c1Cl)C=O                     | C14982474 | -15.41 | -2.53 | -14.7  | 3.96 | -2.13 |
| 1722 | c1c(nc(s1)N)N                       | C15863137 | -15.41 | -5.06 | -14.95 | 4.14 | 0.45  |
| 1723 | CC(=O)c1c[nH]nc1                    | C16696740 | -15.41 | -3.42 | -16.83 | 5.88 | -1.05 |
| 1724 | C/C(=C)Br/COC                       | C16970519 | -15.41 | -1.23 | -13.48 | 1.77 | -2.48 |
| 1725 | c1c(cnc(c1)Br)N                     | C19943157 | -15.41 | -3.5  | -16.35 | 4.4  | 0.04  |
| 1726 | Cc1ccc(cc1)NN                       | C00153114 | -15.4  | -1.36 | -14.71 | 2.64 | -1.96 |
| 1727 | c1ccc(c(c1)N)OC(F)F                 | C00528010 | -15.4  | -1.39 | -16.66 | 4.28 | -1.63 |
| 1728 | Cc1ccc(cc1)FO                       | C02512465 | -15.4  | -2    | -15.01 | 3.28 | -1.67 |
| 1729 | Cc1ccncc1/C(=N/O)N                  | C04269154 | -15.4  | -2.53 | -17.48 | 4.96 | -0.35 |
| 1730 | c1(c(n[O+])1[O-])[N+](=O)[O-]C(=O)N | C04903937 | -15.4  | -0.75 | -16.56 | 3.48 | -1.57 |
| 1731 | c1cc(ccc1C(=[NH2+])NO)F             | C12649842 | -15.4  | -2.97 | -16.03 | 4.51 | -0.9  |
| 1732 | c1ccc2c(c1)non2                     | C00161256 | -15.39 | -3.43 | -13.7  | 4.66 | -2.93 |
| 1733 | Cn1cnc1[N+](=O)[O-]                 | C01564459 | -15.39 | -3.82 | -14.86 | 8.62 | -5.34 |
| 1734 | c1c(nc(nc1)F)F                      | C01845800 | -15.39 | -0.77 | -15.8  | 2.53 | -1.35 |
| 1735 | c1(c(nc2c(n1)non2)[O-])N            | C03163100 | -15.39 | -3    | -19.07 | 6    | 0.67  |
| 1736 | c1cc(oc1)/C=C/C=N/O                 | C03200730 | -15.39 | -3.12 | -19.5  | 8.39 | -1.16 |
| 1737 | c1ccnc(c1)CCC(=O)Cl                 | C04204053 | -15.39 | -2.36 | -13.37 | 3.87 | -3.53 |
| 1738 | c1ccc2c(c1)nc(o2)N                  | C08581625 | -15.39 | -4.21 | -15.71 | 4.45 | 0.07  |
| 1739 | c1c(c(cc(c1)F)F)N                   | C19615643 | -15.39 | 0.21  | -16.59 | 3.26 | -2.27 |
| 1740 | C/C(=C)C(F)(F)F/[N+](=O)[O-]        | C22221040 | -15.39 | -0.27 | -14.25 | 2.51 | -3.38 |
| 1741 | [H]/N=C/1/C=C/C@H(S1)CC             | C31861623 | -15.39 | -1.75 | -14.81 | 3.31 | -2.13 |
| 1742 | Oc1ccccc1                           | W2002A005 | -15.39 | -2.02 | -14.95 | 2.77 | -1.19 |
| 1743 | Cc1cc(ccc1)N                        | C00388337 | -15.38 | -4.31 | -12.84 | 2.51 | -0.75 |
| 1744 | C1C(=NO)CSS1                        | C05181011 | -15.38 | -2.77 | -14.56 | 3.4  | -1.45 |
| 1745 | c1ccnc(c1)NC(=S)N                   | C05594482 | -15.38 | 0.05  | -18.22 | 4.73 | -1.94 |
| 1746 | c1cc(sc1)CCC=O                      | C19682802 | -15.38 | -1.55 | -15.45 | 5.24 | -3.62 |
| 1747 | c1cc(ccc1)OS                        | C19735431 | -15.38 | -0.82 | -17.32 | 4.02 | -1.25 |
| 1748 | CCc1ccc[nH+]c1N                     | C21985770 | -15.38 | -0.9  | -16.14 | 3.89 | -2.22 |
| 1749 | c1cc(sc1/C=N/O)Cl                   | C00112364 | -15.37 | -2.87 | -16.59 | 5.45 | -1.36 |
| 1750 | c1c(c(cs1)N)N                       | C02170007 | -15.37 | -3.87 | -14.58 | 2.54 | 0.54  |
| 1751 | CCC/C(=C/C(=O)C(F)F)/[O-]           | C04023573 | -15.37 | -2.1  | -12.34 | 2.32 | -3.25 |
| 1752 | C=CCOCCI                            | C04203522 | -15.37 | -0.49 | -14.15 | 1.79 | -2.52 |
| 1753 | c1(nc(sn1)Br)N                      | C06720865 | -15.37 | -2.28 | -14.53 | 2.67 | -1.22 |
| 1754 | Cn1cc(nc1)CCl                       | C08614783 | -15.37 | -1.09 | -16.03 | 5.51 | -3.77 |
| 1755 | Cc1c(cncn1)O                        | C14982946 | -15.37 | -2.19 | -17.01 | 4.15 | -0.32 |
| 1756 | c1cc(nn2c1ncc2)F                    | C18555988 | -15.37 | -3.59 | -15.13 | 5.76 | -2.4  |
| 1757 | c1cc(ccc1c2cc(no2)CC(=O)[O-])F      | C20270419 | -15.37 | 0.02  | -18.82 | 7.31 | -3.89 |
| 1758 | Cc1cc(co1)C(F)F                     | C26506528 | -15.37 | -0.94 | -13.94 | 2.8  | -3.29 |
| 1759 | C[C@H](c1ccc(cc1)F)O                | C00388214 | -15.36 | -1.09 | -15.13 | 3.04 | -2.18 |
| 1760 | c1ccc(cc1)NNC=O                     | C01711848 | -15.36 | -0.55 | -18.96 | 5.89 | -1.74 |
| 1761 | C#CCOc1ccc(cc1)N                    | C09239338 | -15.36 | -0.53 | -16.65 | 4.25 | -2.43 |
| 1762 | CN/C(=N/C#N)/N=[N+]=[N-]            | C17024863 | -15.36 | -3.01 | -15.32 | 5.54 | -2.57 |
| 1763 | c1cc(c(nc1)N)[N+](=O)[O-]           | C19596908 | -15.36 | -2.24 | -18.25 | 6.57 | -1.44 |
| 1764 | [C@H-]1C(=[NH+])C(=CN1)Br           | C28617731 | -15.36 | -0.65 | -18.48 | 5.5  | -1.72 |
| 1765 | c1c(c(nnc1)Cl)N                     | C01688662 | -15.35 | -4.61 | -15.06 | 4.79 | -0.46 |
| 1766 | Cc1cc[nH]c1                         | C02034399 | -15.35 | -1.83 | -13.85 | 2.64 | -2.31 |
| 1767 | C(COC(=O)c1c(non1)N)O               | C02288990 | -15.35 | -3.88 | -17.82 | 5.33 | 1.03  |
| 1768 | c1cc(cc(c1)F)OC(F)F                 | C02560217 | -15.35 | -0.35 | -13.55 | 1.8  | -3.25 |
| 1769 | c1c(cc(c(c1[N+](=O)[O-])N)F)F       | C03876123 | -15.35 | -2.2  | -13.49 | 2.87 | -2.53 |
| 1770 | [C@]1(C)(O1)(F)F(C(F)F)F            | C04266015 | -15.35 | 0.05  | -13.46 | 0.5  | -2.43 |
| 1771 | Cc1c(c[nH]1)Br                      | C05424919 | -15.35 | -4.09 | -13.33 | 3.7  | -1.63 |
| 1772 | c1c2c([nH]c(=O)[nH]2)ncn1           | C13548121 | -15.35 | -5.09 | -18.18 | 6.35 | 1.58  |
| 1773 | c1cc(oc1)N=C=O                      | C19502690 | -15.35 | -0.13 | -18.13 | 2.72 | 0.19  |
| 1774 | c1cc(cnc1)CC=O                      | C19729368 | -15.35 | -2.53 | -16.98 | 6.54 | -2.39 |
| 1775 | CC(=O)Nc1ccc(cc1)F                  | C00151118 | -15.34 | -1.46 | -15.73 | 4.65 | -2.8  |
| 1776 | Cc1ccnc(c1)F                        | C00403519 | -15.34 | -1.46 | -15.64 | 4.22 | -2.46 |
| 1777 | CC(=O)OCc1cccn1                     | C01665465 | -15.34 | -0.31 | -18.07 | 6.47 | -3.43 |
| 1778 | c1c(ncnc1)Cl                        | C01675006 | -15.34 | -2.97 | -14.86 | 3.8  | -1.31 |
| 1779 | c1cc(c(cc1SC#N)O)O                  | C01680025 | -15.34 | -1.82 | -20.32 | 5.75 | 1.05  |
| 1780 | c1ccc(cc1)OP(O)O                    | C01755749 | -15.34 | -2.2  | -19.32 | 7.93 | -1.76 |
| 1781 | c1(c(c(c(c1)F)S)F)F                 | C02022402 | -15.34 | -0.22 | -12.7  | 0.55 | -2.96 |
| 1782 | c1cnnc(n1)NN=O                      | C06585043 | -15.34 | -3.81 | -17.99 | 7.66 | -1.2  |
| 1783 | C(=C/[N+](=O)[O-])C(F)F             | C16889905 | -15.34 | 1.68  | -16.98 | 2.99 | -3.03 |
| 1784 | c1cc(nc(c1)F)N                      | C19616089 | -15.34 | -3.92 | -15.93 | 5.49 | -0.97 |
| 1785 | Cc1cc[nH]c1                         | W2002A001 | -15.34 | -1.86 | -13.84 | 2.65 | -2.3  |
| 1786 | COc1cc(cc(c1)F)F                    | C00409323 | -15.33 | -0.07 | -14.27 | 1.97 | -2.96 |
| 1787 | c1enn2c1c(nnc2)[O-]                 | C00501376 | -15.33 | -3.18 | -17.84 | 6.62 | -0.92 |
| 1788 | c1cnnc1N                            | C01593930 | -15.33 | -2.54 | -16    | 4.2  | -1    |
| 1789 | CCOC(=O)C(F)Cl                      | C01691290 | -15.33 | -1.06 | -12.75 | 1.56 | -3.07 |
| 1790 | c1cc(sc1)C(=O)Cl                    | C02141006 | -15.33 | 2.02  | -18.3  | 3.87 | -2.92 |
| 1791 | c1cncc(c1)C(F)F                     | C02578102 | -15.33 | -2.8  | -14.18 | 4.5  | -2.85 |
| 1792 | c1cc(c(c1NC(=O)N)F)F                | C19398959 | -15.33 | -2.3  | -20.39 | 7.9  | -0.54 |
| 1793 | c1c(c(ncn1)N)F                      | C26466410 | -15.33 | -3.63 | -15.1  | 4.54 | -1.14 |
| 1794 | C(#N)c1c(n[nH]1)Cl                  | C02566328 | -15.32 | -5.07 | -13.54 | 3.62 | -0.33 |
| 1795 | c1c(non1)c2c(non2)N                 | C02566776 | -15.32 | -1.63 | -17.72 | 4.07 | -0.05 |
| 1796 | Cc1cc(sc1)C#N                       | C04290335 | -15.32 | -0.24 | -15.03 | 3.42 | -3.47 |

|      |                                 |           |        |       |        |       |       |
|------|---------------------------------|-----------|--------|-------|--------|-------|-------|
| 1797 | c1cc(nc(c1C=O)F)F               | C14982658 | -15.32 | -1.47 | -16.52 | 4.37  | -1.7  |
| 1798 | c1ccc(c(c1)N)I                  | C00157582 | -15.31 | -2.27 | -15.93 | 1.8   | 1.09  |
| 1799 | c1cc([nH]c1C=O)[N+](=O)[O-]     | C01681946 | -15.31 | -4.07 | -17.13 | 8.73  | -2.84 |
| 1800 | Cc1cnc(cn1)C#N                  | C02528733 | -15.31 | -0.9  | -18.03 | 5.16  | -1.54 |
| 1801 | c1ccc(cc1)c2cc(cn2)[O-]         | C02774749 | -15.31 | -3.78 | -14.1  | 5.36  | -2.79 |
| 1802 | c1cc(sc1)C(=O)C=O               | C04204386 | -15.31 | -0.37 | -19.33 | 7.61  | -3.22 |
| 1803 | CCOC(=O)C@H](F)I                | C04255779 | -15.31 | -0.79 | -13.72 | 2.56  | -3.36 |
| 1804 | CC(=O)N(C)N=O                   | C04742492 | -15.31 | -2.02 | -15.46 | 2.84  | -0.68 |
| 1805 | c1c(cnc(n1)Br)Br                | C08698478 | -15.31 | -1.62 | -13.59 | 2.39  | -2.49 |
| 1806 | c1cn2cc(cnc2n1)Br               | C16125217 | -15.31 | -2.22 | -16.09 | 7.65  | -4.66 |
| 1807 | c1cnc(cc1Cl)N                   | C19735878 | -15.31 | -2.03 | -15.48 | 3.6   | -1.41 |
| 1808 | c1cc(ccc1Cl)Cl                  | C00388507 | -15.3  | -0.69 | -15.04 | 1.08  | -0.65 |
| 1809 | COC(=O)Cct1cccnc1               | C00393945 | -15.3  | -0.22 | -18.51 | 6.58  | -3.16 |
| 1810 | c1(c(nc(c(n1)F)F)N)N            | C01655762 | -15.3  | -5.9  | -17.7  | 6.13  | 2.17  |
| 1811 | CNC(=O)Oc1cccnc1                | C01716719 | -15.3  | 0.33  | -21.01 | 7.4   | -2.03 |
| 1812 | c1cc(c(nc1)Br)F                 | C02598979 | -15.3  | 0.49  | -17.71 | 4.45  | -2.53 |
| 1813 | c1c(c(n[nH]1)N)Br               | C04240086 | -15.3  | -4.37 | -14.7  | 4.18  | -0.41 |
| 1814 | Cc1ccnc(n1)N                    | C00404289 | -15.29 | -2.88 | -14.91 | 4.58  | -2.07 |
| 1815 | COC(=O)Cct1ccc(cc1)N            | C01494999 | -15.29 | -1.62 | -16.35 | 5.56  | -2.88 |
| 1816 | COCc1cccnc1                     | C01586379 | -15.29 | -0.51 | -14.12 | 2.53  | -3.2  |
| 1817 | Cc1c(ccc1F)O                    | C01732032 | -15.29 | -1.78 | -16.52 | 3.22  | -0.21 |
| 1818 | c1c(c(nc(n1)N)N)C=O             | C01748627 | -15.29 | -6.61 | -14.34 | 6.21  | -0.56 |
| 1819 | CC(=O)Oc1ccc(c1)F               | C02512236 | -15.29 | -0.86 | -16.19 | 6.12  | -4.36 |
| 1820 | [C@]1(C(O1)(F)F)(C(F)F)F        | C04266020 | -15.29 | 0.33  | -13.54 | 0.49  | -2.58 |
| 1821 | C(#N)C1=NC(=S)N=C1[NH-]         | C05500160 | -15.29 | -3.12 | -16.01 | 4.24  | -0.39 |
| 1822 | c1ccc1C=N/O                     | C15219920 | -15.29 | -3.45 | -16.22 | 4.61  | -0.24 |
| 1823 | c1c[nH+]ccc1N                   | C19075724 | -15.29 | -2.4  | -16.04 | 3.51  | -0.36 |
| 1824 | c1c(c(cc(c1F)Cl)F)N             | C20286525 | -15.29 | 0.47  | -16.85 | 3.29  | -2.19 |
| 1825 | CC(=O)c1ncc(s1)Cl               | C22007391 | -15.29 | -0.6  | -15.15 | 2.74  | -2.28 |
| 1826 | c1cc(ncc1N)Br                   | C01427060 | -15.28 | -3.17 | -15.49 | 4.15  | -0.77 |
| 1827 | COC(=O)C#CBr                    | C01635685 | -15.28 | -0.96 | -15.46 | 2.72  | -1.57 |
| 1828 | c1cc(ccc1Cl)N[N+](=O)[O-]       | C03852415 | -15.28 | -2.23 | -13.83 | 3.6   | -2.82 |
| 1829 | CC(=O)Nn1cnc2c(c1=O)cn[nH]2     | C05479373 | -15.28 | -3.11 | -22.51 | 11.68 | -1.34 |
| 1830 | c1cc(ccc1N)F)N                  | C05479668 | -15.28 | -2.93 | -17.08 | 3.03  | 1.7   |
| 1831 | c1ccnc(c1)/C=C/C#N)/N           | C12348960 | -15.28 | -2.43 | -18    | 7.16  | -2.01 |
| 1832 | c1c(n[nH]n1)S                   | C12405203 | -15.28 | -4.04 | -14.67 | 3.03  | 0.4   |
| 1833 | Cc1[n-]c(nn1)Cl                 | C14982426 | -15.28 | -3.56 | -14.15 | 4.35  | -1.92 |
| 1834 | c1ccc(cc1)OC(C(=C(F)F)F)(F)F    | C15441996 | -15.28 | -0.79 | -12.26 | 2.16  | -4.4  |
| 1835 | c1nnc(n1)C(=O)N                 | C01727048 | -15.27 | -4.39 | -17.18 | 5.15  | 1.15  |
| 1836 | CCOC(=O)N(CC=C)N=O              | C05412145 | -15.27 | 0.58  | -17.91 | 3.68  | -1.62 |
| 1837 | c1cc(ccc1c2cc(no2)CC[NH3+])Cl   | C20270381 | -15.27 | -0.07 | -10.41 | -0.58 | -4.22 |
| 1838 | c1[nH]nc(n1)C(=O)Nn2cnc2        | C01064775 | -15.26 | -0.33 | -21.76 | 9.47  | -2.65 |
| 1839 | C=C(C[N+](=O)[O-])CCl           | C01678154 | -15.26 | -0.43 | -15.69 | 3.99  | -3.12 |
| 1840 | c1cn2cnc2cn1                    | C01695126 | -15.26 | -2.44 | -19.81 | 8.24  | -1.25 |
| 1841 | Cc1cccnc1CN=C=O                 | C02568120 | -15.26 | -1.37 | -14.4  | 2.76  | -2.25 |
| 1842 | c1cc(oc1)CC=O                   | C02581181 | -15.26 | -2.17 | -16.6  | 5.23  | -1.72 |
| 1843 | [H]/N=C\1/n(ccs1)C              | C12504702 | -15.26 | -2.14 | -15.29 | 4.27  | -2.1  |
| 1844 | c1ccc(cc1)CC(=O)NO              | C16887669 | -15.26 | -4.23 | -15    | 3.99  | -0.02 |
| 1845 | c1cscnc1C=O                     | C00158756 | -15.25 | -1.57 | -16.81 | 5.45  | -2.31 |
| 1846 | c1cc(cnc1)C(=O)Cl               | C02539499 | -15.25 | -2.51 | -14.11 | 3.59  | -2.21 |
| 1847 | C#Cc1ccc(cc1)C#N                | C02541504 | -15.25 | -0.76 | -14.13 | 4.23  | -4.59 |
| 1848 | C(C(=O)C(C(F)F)F)Br             | C04242005 | -15.25 | -0.59 | -14.44 | 2.75  | -2.98 |
| 1849 | C(F)F(F)SSC(F)F)F               | C04329251 | -15.25 | -0.23 | -12.32 | 0.57  | -3.27 |
| 1850 | c1ccc(cc1/C=N/O)Cl              | C04582531 | -15.25 | -3.76 | -15.3  | 4.18  | -0.37 |
| 1851 | COC(=O)Nc1ccc(cc1F)Cl           | C06126168 | -15.25 | 0.94  | -19.13 | 3.49  | -0.56 |
| 1852 | c1c(cc(c2c1[nH]nc2)F)F          | C14983967 | -15.25 | -1.3  | -14.42 | 2.91  | -2.44 |
| 1853 | CCOC1c(ccc1F)F                  | C16159347 | -15.25 | 0.89  | -16.76 | 4.45  | -3.84 |
| 1854 | c1c2c(no1)CCCC2                 | C16951353 | -15.25 | -0.56 | -15.47 | 3.95  | -3.17 |
| 1855 | CSc1cnc(s1)N                    | C16952003 | -15.25 | -5.35 | -11.12 | 3     | -1.79 |
| 1856 | C[C@]([H])C=C[C@H]2COCC2=C1     | C18529661 | -15.25 | -1.65 | -12.1  | 1.76  | -3.26 |
| 1857 | CC(=C)C(=O)Cl                   | C02040191 | -15.24 | -1.44 | -14.51 | 2.93  | -2.22 |
| 1858 | COc1c(cc(cc1F)O)F               | C02527841 | -15.24 | 0.16  | -18.7  | 4.13  | -0.84 |
| 1859 | C1C=CC(=C1)CO                   | C12358631 | -15.24 | -2.28 | -14.71 | 2.88  | -1.13 |
| 1860 | CNc1ccc(cc1)C(F)F)F             | C12956268 | -15.24 | -0.62 | -14.11 | 2.63  | -3.15 |
| 1861 | c1([nH]c(=O)[nH]n1)C(F)F)F      | C14608573 | -15.24 | -2.93 | -16.46 | 4.22  | -0.07 |
| 1862 | c1cc(c(nc1)C(F)F)F)F            | C15442281 | -15.24 | -3.1  | -14.66 | 5.45  | -2.93 |
| 1863 | c1(c(ncc(=O)[nH]1)Br)[O-]       | C18106308 | -15.24 | -2.78 | -17.34 | 3.49  | 1.39  |
| 1864 | c1(nc2n(n1)[C@]([H])(N=N2)N)N   | C19798284 | -15.24 | -3.03 | -19.4  | 6.83  | 0.36  |
| 1865 | COC(=O)C(=O)Ct1cccsc1           | C32007764 | -15.24 | 1.2   | -17.17 | 4.93  | -4.2  |
| 1866 | COC(=O)c1cnoc1N                 | C00258212 | -15.23 | -0.9  | -18.63 | 4.51  | -0.21 |
| 1867 | c1cc(c(nc1)C#N)N                | C01433329 | -15.23 | -3.08 | -17.84 | 6.36  | -0.67 |
| 1868 | CCc1ccc(c1)O                    | C01648289 | -15.23 | -1.13 | -14.63 | 2.74  | -2.21 |
| 1869 | Cc1cscn1                        | C01675771 | -15.23 | -1.75 | -14.96 | 3.22  | -1.74 |
| 1870 | c1c(cc(c(c1F)N)Cl)F             | C02512350 | -15.23 | -2.69 | -13.42 | 1.34  | -0.47 |
| 1871 | c1c(nc(nc1F)F)N                 | C02565586 | -15.23 | -4.56 | -15.13 | 4.88  | -0.42 |
| 1872 | C=CCO/N=C/c1c(non1)N)N          | C04181337 | -15.23 | -0.55 | -17.76 | 2.85  | 0.22  |
| 1873 | Cc1c(c(n[nH]1)N)Cl              | C12356776 | -15.23 | -4.14 | -14.66 | 4.23  | -0.67 |
| 1874 | c1ccnc(c1)CF                    | C15042159 | -15.23 | -1.85 | -14.99 | 4.27  | -2.66 |
| 1875 | Cc1ccc(ncc1N)F                  | C16159661 | -15.23 | -4.24 | -15.21 | 5.04  | -0.82 |
| 1876 | c1c(c(c(nn1)[O-])N)[N+](=O)[O-] | C26506582 | -15.23 | -3.4  | -18.01 | 5.07  | 1.1   |
| 1877 | Cc1cccnc1F                      | C00403518 | -15.22 | -1.56 | -15.86 | 4.65  | -2.46 |
| 1878 | CC(=O)OC/C=C/Cl                 | C01681467 | -15.22 | -0.87 | -16.47 | 3.96  | -1.84 |
| 1879 | c1ccc2c(c1)COC2                 | C02040452 | -15.22 | -1.14 | -13.91 | 2.73  | -2.9  |
| 1880 | c1cc(ccc1N)N[N+](=O)[O-]        | C04044869 | -15.22 | -2.18 | -18.55 | 6.29  | -0.78 |
| 1881 | Cc1ccc(c(c1N)N)[N+](=O)[O-]     | C04520851 | -15.22 | -2.02 | -15.44 | 5.14  | -2.9  |
| 1882 | c1cc(oc1)C=N/O                  | C08579610 | -15.22 | -4.3  | -17.28 | 6.55  | -0.2  |
| 1883 | c1c(nc(s1)Cl)Cl                 | C08939671 | -15.22 | -1.28 | -14.86 | 2.96  | -2.04 |
| 1884 | c1ccc2c(c1)nc(s2)C#N            | C12360442 | -15.22 | -1.47 | -15.08 | 4.74  | -3.42 |
| 1885 | c1ccc(cc1)N=[N+]=[N-]           | M1995A010 | -15.22 | 0.58  | -15.88 | 1.78  | -1.7  |
| 1886 | CCc1[nH]c(cn1)C=O               | C00164927 | -15.21 | -2.54 | -16.9  | 6.06  | -1.84 |

|      |                                         |           |        |       |        |      |       |
|------|-----------------------------------------|-----------|--------|-------|--------|------|-------|
| 1887 | c1cc(c(cc1O)O)Br                        | C00404317 | -15.21 | -1.21 | -18.06 | 3.62 | 0.43  |
| 1888 | c1cncc(c1Cl)CO                          | C01585512 | -15.21 | -3.13 | -15.12 | 3.55 | -0.52 |
| 1889 | Cc1ccc(s1)C                             | C01690407 | -15.21 | -0.93 | -12.4  | 1.9  | -3.78 |
| 1890 | c1cc(c(cc1N)O)Cl                        | C02567235 | -15.21 | -0.5  | -18.28 | 3.58 | -0.01 |
| 1891 | C1C(=O)NC=CS1                           | C03846684 | -15.21 | -2.99 | -16.13 | 4.81 | -0.89 |
| 1892 | c1ccc(cc1)SC(=NH2+)N                    | C04203785 | -15.21 | -0.14 | -16.33 | 3.35 | -2.09 |
| 1893 | Cc1c(c([n-]n1)[N+](=O)[O-])[N+](=O)[O-] | C05296576 | -15.21 | -3.44 | -13.81 | 5.04 | -3    |
| 1894 | c1cc(c(c(c1F)N)Cl)F                     | C12359296 | -15.21 | -2.34 | -14.63 | 2.2  | -0.44 |
| 1895 | c1c(cnc1Br)[N+](=O)[O-]                 | C14982289 | -15.21 | -1.34 | -13.79 | 2.95 | -3.03 |
| 1896 | c1(nc(sn1)Cl)N                          | C17061322 | -15.21 | -3.24 | -15.06 | 4.24 | -1.14 |
| 1897 | C(CCl)n1nc(nn1)N                        | C17104993 | -15.21 | -5.29 | -13.94 | 6.01 | -1.99 |
| 1898 | c1c(cnc1N)Cl)N                          | C21981912 | -15.21 | -4.49 | -17.95 | 6.45 | 0.78  |
| 1899 | [H]/N=C1/C=C2CCCC2S1                    | C31861595 | -15.21 | -1.97 | -14.81 | 4.05 | -2.48 |
| 1900 | c1cnnc(c1Cl)Cl                          | C01699062 | -15.2  | -2.92 | -14.76 | 4.49 | -2    |
| 1901 | c1cc(nc(c1)Cl)F                         | C02149727 | -15.2  | -1.02 | -16.6  | 4.81 | -2.39 |
| 1902 | C(#N)C(C(#N)(F)F)F                      | C02576929 | -15.2  | -0.16 | -14.57 | 2    | -2.47 |
| 1903 | c1cc(cnc1)/C(=N/N)N                     | C02580892 | -15.2  | -2.94 | -20    | 4.45 | 3.28  |
| 1904 | c1cnc(cc1Br)N                           | C19862889 | -15.2  | -2.08 | -15.21 | 3.59 | -1.51 |
| 1905 | c1cc(ccc1NC(=O)N)Cl                     | C00097935 | -15.19 | -2.54 | -18.78 | 6.82 | -0.69 |
| 1906 | CCOC(=O)CCS                             | C00409355 | -15.19 | -1.34 | -13.65 | 2.84 | -3.03 |
| 1907 | Cc1ccc(c(c1)N)I                         | C02570685 | -15.19 | -2.77 | -10.97 | 1.75 | -3.2  |
| 1908 | Cc1cc(n[nH]1)(C(F)F)F                   | C04693290 | -15.19 | -0.77 | -15.13 | 2.7  | -1.98 |
| 1909 | C=CCO1c1ccnc1N                          | C19093139 | -15.19 | -1.26 | -15.61 | 3.57 | -1.9  |
| 1910 | Cc1cc(n[nH]1)C=O                        | C20357649 | -15.19 | -2.23 | -15.68 | 4.72 | -2.01 |
| 1911 | c1ccc(c(c1)C=O)N                        | C04202514 | -15.18 | -4.92 | -14.12 | 5.49 | -1.63 |
| 1912 | CCn1ccnc1                               | C08294979 | -15.18 | -2.18 | -14.41 | 4.8  | -3.39 |
| 1913 | C=C(Cl=O)Cl)F                           | C08698303 | -15.18 | -1.6  | -14.4  | 2.59 | -1.77 |
| 1914 | c1c(cc(c(c1O)F)F)F                      | C00389682 | -15.17 | -1.24 | -15.89 | 3.29 | -1.33 |
| 1915 | c1nc(c(c(n1)N)SC#N)N                    | C01036822 | -15.17 | -2.63 | -18.03 | 6.21 | -0.72 |
| 1916 | c1cnc(cn1)NN                            | C01402333 | -15.17 | -3.11 | -17.26 | 4.89 | 0.7   |
| 1917 | c1csc2c1nns2                            | C01632266 | -15.17 | -2.94 | -17.93 | 5.11 | 0.58  |
| 1918 | c1ccc(c(c1)c2nc([nH]n2)N)N              | C06658084 | -15.17 | -0.12 | -19.53 | 6.72 | -2.24 |
| 1919 | c1(mnc(n1)NN)C(F)F                      | C12336363 | -15.17 | -5.14 | -15.95 | 7.36 | -1.44 |
| 1920 | [H]/N=C1/NC(SS1)(Cl)Cl                  | C17173602 | -15.17 | -0.36 | -13.31 | 0.77 | -2.26 |
| 1921 | C1C[C@H]2[C@H](C)C2=C1O                 | C25695669 | -15.17 | -1.89 | -14.47 | 3.04 | -1.85 |
| 1922 | c1c(cnc1F)CO                            | C01573930 | -15.16 | -1.55 | -17.76 | 4.11 | 0.03  |
| 1923 | Cc1cc([nH]1)C                           | C01574400 | -15.16 | -0.96 | -14.1  | 2.71 | -2.82 |
| 1924 | c1cc(ccc1[N+](=O)[O-])F                 | C01706157 | -15.16 | -1.05 | -13.94 | 3.72 | -3.89 |
| 1925 | CCOC1cncnc1                             | C02560521 | -15.16 | -1.98 | -16.42 | 3.67 | -0.42 |
| 1926 | c1cc(cc(c1)F)NNC(=O)N                   | C02569462 | -15.16 | -1.76 | -19.5  | 6.45 | -0.34 |
| 1927 | c1csc2c1csc2                            | C05605232 | -15.16 | -1.22 | -16.96 | 3    | 0.01  |
| 1928 | c1cnc(cc1C(F)F)F                        | C19616126 | -15.16 | 0.76  | -16.46 | 3.3  | -2.76 |
| 1929 | CNc1nccs1                               | C19872627 | -15.16 | -2.57 | -15.92 | 4.76 | -1.43 |
| 1930 | C=Cc1cnc1                               | C00389820 | -15.15 | -1.28 | -14.7  | 4.7  | -3.88 |
| 1931 | c1c(c(nc(n1)N)N)F                       | C01574355 | -15.15 | -3.92 | -17.45 | 3.76 | 2.47  |
| 1932 | CNC(=O)C1c(non1)N                       | C06679794 | -15.15 | -5.9  | -14.21 | 3.8  | 1.16  |
| 1933 | c1csc(n1)N                              | C08579603 | -15.15 | -3.79 | -14.46 | 3.65 | -0.55 |
| 1934 | c1cc(sc1)CNN                            | C19263370 | -15.15 | -0.64 | -16.36 | 2.58 | -0.73 |
| 1935 | c1cc(c(c(c1)F)CO)F                      | C00409199 | -15.14 | -2.93 | -15.17 | 4.35 | -1.39 |
| 1936 | c1cc(cc(c1)N)CC#N                       | C02507095 | -15.14 | -1.46 | -17.06 | 5.99 | -2.62 |
| 1937 | c1c([nH]c2c1cc(cn2)N                    | C06643328 | -15.14 | -1.6  | -18.05 | 5.72 | -1.2  |
| 1938 | Cc1cc(cs1)Cl                            | C21986910 | -15.14 | -0.83 | -12.33 | 1.63 | -3.6  |
| 1939 | c1ccc(c(c1)CO)O                         | C00002054 | -15.13 | -2.36 | -17.62 | 4.15 | 0.7   |
| 1940 | Cc1ccsc1C                               | C01845895 | -15.13 | -1.41 | -11.94 | 1.85 | -3.63 |
| 1941 | c1(c(c(c(c(c1F)F)F)F)N)N                | C02022416 | -15.13 | -1.41 | -13.91 | 1.88 | -1.68 |
| 1942 | Cl(=O)(C(F)F)Cl)F                       | C05178392 | -15.13 | -0.26 | -13.72 | 1.08 | -2.24 |
| 1943 | Cc1nc(n(n1)C)N                          | C17024968 | -15.13 | -5.84 | -13.52 | 6.59 | -2.36 |
| 1944 | c1c(c(n[nH]c1=S)[S-])N                  | C17426315 | -15.13 | -5.69 | -15.04 | 5.3  | 0.29  |
| 1945 | c1c(cnc(c1Cl)N)C#N                      | C20218632 | -15.13 | -0.53 | -17.41 | 4.57 | -1.76 |
| 1946 | c1c(cnc(n1)Cl)Cl                        | C22005578 | -15.13 | -1.65 | -13.11 | 2.35 | -2.73 |
| 1947 | c1c(ccon1)CN=[N+]=[N-]                  | C26547916 | -15.13 | -0.53 | -19.49 | 4.33 | 0.57  |
| 1948 | Cc1c(cccn1)O                            | C00153239 | -15.12 | -1.57 | -16.98 | 3.97 | -0.54 |
| 1949 | c1ccc(c(c1)CC=O)O                       | C06095286 | -15.12 | -0.59 | -19.53 | 4.93 | 0.06  |
| 1950 | c1cc(ccc1C(=O)N=C=O)F                   | C06661885 | -15.12 | 1.45  | -18.48 | 3.08 | -1.17 |
| 1951 | c1(c([nH+]nc(=S)[nH]1)[O-])[O-]         | C09354658 | -15.12 | -6.15 | -18.13 | 6.35 | 2.81  |
| 1952 | C/C=C/C=CO                              | C13546463 | -15.12 | -2.85 | -13.71 | 2.39 | -0.95 |
| 1953 | [H]/N=C/(c1cncnc1N)N                    | C20272756 | -15.12 | -5.1  | -16.6  | 6.49 | 0.1   |
| 1954 | c1c(cnc(n1)NN)Cl                        | C26441083 | -15.12 | -3.35 | -14.66 | 4.46 | -1.56 |
| 1955 | c1cc(ncc1O)Cl                           | C00335761 | -15.11 | -1.18 | -17.74 | 4.04 | -0.23 |
| 1956 | c1ccn2cccc2c1                           | C02040898 | -15.11 | -1.99 | -15.37 | 3.83 | -1.58 |
| 1957 | c1cnoc1C(=O)N                           | C02565041 | -15.11 | -3.04 | -17.8  | 4.91 | 0.82  |
| 1958 | c1cc(c(cc1F)N)N                         | C02584360 | -15.11 | -3.02 | -14.97 | 2.29 | 0.59  |
| 1959 | Cc1cc(no1)C(F)F                         | C04137189 | -15.11 | -1.13 | -15.06 | 3.91 | -2.84 |
| 1960 | c1nnc2n1C(=O)CS2                        | C09024413 | -15.11 | -0.08 | -19.96 | 7.95 | -3.03 |
| 1961 | Cc1cccc(n1)N                            | C19075790 | -15.11 | -3.3  | -13.83 | 3.56 | -1.53 |
| 1962 | c1c(cnc(c1Cl)N)O                        | C21981818 | -15.11 | -3.69 | -18.02 | 5.89 | 0.71  |
| 1963 | c1c([nH+]cc(c1)O)O                      | C21988285 | -15.11 | -0.46 | -16.32 | 2.37 | -0.7  |
| 1964 | Cc1c(cccn1)[S-]                         | C26438572 | -15.11 | -0.62 | -13.73 | 1.83 | -2.59 |
| 1965 | c1[nH]c2c([nH+]1)CCC2                   | C26441246 | -15.11 | -2.42 | -17    | 7.35 | -3.04 |
| 1966 | C=Cc1cncn1                              | C00051189 | -15.1  | -2.65 | -14.37 | 5.61 | -3.69 |
| 1967 | c1ccc(cc1)SCC#N                         | C02163480 | -15.1  | -0.49 | -15.45 | 5.48 | -4.64 |
| 1968 | c1cc(ncc1)NN=O                          | C13213266 | -15.1  | -2.77 | -15.78 | 5.55 | -2.1  |
| 1969 | c1cc(mnc1Cl)I                           | C20358093 | -15.1  | -2.27 | -14.44 | 4.06 | -2.45 |
| 1970 | c1ccncc1                                | C00895354 | -15.09 | -1.22 | -14.71 | 2.91 | -2.06 |
| 1971 | c1cnc(cn1)N                             | C00967322 | -15.09 | -3.7  | -15.78 | 4.17 | 0.22  |
| 1972 | Cn1c(=O)c([nH]c1=O)Br                   | C01592762 | -15.09 | -2.46 | -16.13 | 3.36 | 0.14  |
| 1973 | c1ccsc1                                 | C01597767 | -15.09 | -1.12 | -12.86 | 1.43 | -2.54 |
| 1974 | CC[C@@H]([N+](=O)[O-])Cl                | C02034489 | -15.09 | -0.64 | -14.39 | 2.74 | -2.8  |
| 1975 | CCOC(=C(F)F)F                           | C02572592 | -15.09 | -0.47 | -13.95 | 1.34 | -2    |
| 1976 | C[C@H]1C(=O)N=C(S1)N                    | C05527921 | -15.09 | -2.71 | -15.11 | 3.14 | -0.4  |

|      |                                      |           |        |       |        |      |       |
|------|--------------------------------------|-----------|--------|-------|--------|------|-------|
| 1977 | c1cc([nH]c1)c2cccnc2                 | C13208435 | -15.09 | 0.99  | -17.69 | 4.76 | -3.16 |
| 1978 | c1cc(ncc1N)CS                        | C21985586 | -15.09 | -1.47 | -17.75 | 5.21 | -1.08 |
| 1979 | c1c(cc(c(c1F)N)Br)F                  | C00152682 | -15.08 | -2.87 | -13.51 | 1.34 | -0.04 |
| 1980 | c1cc(ccc1C#N)O                       | C00388759 | -15.08 | 0.43  | -18.76 | 4.65 | -1.4  |
| 1981 | Cn1c(ncn1)N                          | C01067758 | -15.08 | -3.19 | -15.6  | 6.13 | -2.43 |
| 1982 | C1CS[P@@](O1)OCC(F)(F)F              | C01579433 | -15.08 | -1.52 | -12.19 | 5.45 | -6.82 |
| 1983 | c1cc(=O)oc(c1)Cl                     | C02548333 | -15.08 | -1.36 | -17.29 | 6.73 | -3.16 |
| 1984 | c1cc(cnc1)/C=C/C=O                   | C12360000 | -15.08 | -3.48 | -16.78 | 7.93 | -2.74 |
| 1985 | Cc1c(noc1N)N                         | C15784487 | -15.08 | -4.55 | -16.84 | 5.26 | 1.04  |
| 1986 | CCNc1ccc(c(c1F)F)F                   | C19907714 | -15.08 | -2.47 | -13.55 | 4.26 | -3.32 |
| 1987 | CSc1ccncc1                           | C00330923 | -15.07 | -0.6  | -17.6  | 3.2  | -0.07 |
| 1988 | c1c(nns1)C(=O)N                      | C01718901 | -15.07 | -3.09 | -18.8  | 5.18 | 1.64  |
| 1989 | c1(c(c(c(c1F)F)F)F)F)N               | C02022414 | -15.07 | -3.46 | -11.71 | 2.08 | -1.97 |
| 1990 | C=C(C(=O)OCC(F)(F)F)F                | C02525787 | -15.07 | -0.18 | -15.65 | 3.91 | -3.15 |
| 1991 | C[C@@H](CO[NH](=O)[O-])O[N+](=O)[O-] | C05735208 | -15.07 | -0.5  | -14.17 | 3.92 | -4.32 |
| 1992 | COc1c2c([nH]n1)nncc2                 | C18272284 | -15.07 | -3.39 | -17.07 | 4.82 | 0.57  |
| 1993 | c1cc(ncc1C(F)F)F)N                   | C19735095 | -15.07 | -4.34 | -13.4  | 4.38 | -1.72 |
| 1994 | c1ccc(cc1)O[P@@H](=O)N               | C20230606 | -15.07 | -1.37 | -19.28 | 6.84 | -1.26 |
| 1995 | c1cc(c(cc1F)C(=O)N=C=S)F             | C21968788 | -15.07 | 1.45  | -18.98 | 5.7  | -3.23 |
| 1996 | C1Cc2c(n[nH]c2N)C1                   | C26506268 | -15.07 | -4.03 | -16.29 | 6.54 | -1.29 |
| 1997 | c1cnc(n2c1nccn2)N                    | C26894647 | -15.07 | -2.29 | -16.88 | 7.04 | -2.94 |
| 1998 | C[C@H](c1ccoc1)O                     | C01403558 | -15.06 | -2.62 | -15.37 | 3.51 | -0.59 |
| 1999 | CCCc1ccccc1O                         | C01692499 | -15.06 | 0.14  | -14.75 | 2.56 | -3.02 |
| 2000 | C#CCOC(=O)C(=O)N=[N-]                | C05940572 | -15.06 | -0.45 | -17.78 | 4.67 | -1.51 |
| 2001 | Cc1cn[nH]c1[N+](=O)[O-]              | C09356400 | -15.06 | 1.02  | -17.79 | 4.06 | -2.35 |
| 2002 | Cc1c(c(on1)[O-])[N+](=O)[O-]         | C11804032 | -15.06 | -5.92 | -13.22 | 5.33 | -1.25 |
| 2003 | c1cncnc1                             | Elig_2GUP | -15.06 | -1.11 | -14.8  | 2.9  | -2.06 |
| 2004 | CNc1ncccn1                           | C00330858 | -15.05 | -1.26 | -15.95 | 4.61 | -2.45 |
| 2005 | C/C=C/C(=O)Cl                        | C02242606 | -15.05 | -1.33 | -14.14 | 2.9  | -2.49 |
| 2006 | c1nc(nm1C(=O)N)N                     | C04633181 | -15.05 | -6.7  | -15.43 | 7.38 | -0.31 |
| 2007 | c1cc(oc1[N+](=O)[O-])[N+](=O)[O-]    | C04722185 | -15.05 | -2.07 | -17.48 | 7.32 | -2.82 |
| 2008 | Cc1ncc(c(n1)N)C(S)N                  | C05579929 | -15.05 | -3.32 | -14.36 | 3.22 | -0.6  |
| 2009 | c1c(cnc(c1N)Br)Cl                    | C15441993 | -15.05 | -4.06 | -12.42 | 2.77 | -1.34 |
| 2010 | Cc1cccc(c1F)N                        | C15442933 | -15.05 | -2.18 | -13.18 | 2.65 | -2.34 |
| 2011 | c1cnc(c1)SN                          | C15858165 | -15.05 | -3.48 | -14.6  | 4.02 | -0.99 |
| 2012 | COc1=C(C(C1F)F)F)F)F                 | C16082643 | -15.05 | -1.45 | -12.56 | 1.46 | -2.5  |
| 2013 | c1cc(c(nc1)N)O                       | C19015386 | -15.05 | -3.38 | -16.65 | 4.08 | 0.9   |
| 2014 | c1cncnc1C#N                          | C00331641 | -15.04 | 0.2   | -17.26 | 4.17 | -2.15 |
| 2015 | c1cc(ncc1Cl)[N+](=O)[O-]             | C01580803 | -15.04 | -2.41 | -14.59 | 5.76 | -3.8  |
| 2016 | c1cc(ccc1[S-])I                      | C02382815 | -15.04 | -0.88 | -10.81 | 0.96 | -4.31 |
| 2017 | c1c(sc(n1)Cl)C(=O)Cl                 | C12370742 | -15.04 | -1.04 | -16.78 | 2.36 | 0.42  |
| 2018 | c1cc2nncn2cc1Br                      | C16124908 | -15.04 | -2.97 | -16.54 | 6.8  | -2.33 |
| 2019 | c1cc(sc1CC#N)Cl                      | C19411203 | -15.04 | -2.64 | -14.64 | 6.32 | -4.08 |
| 2020 | C/C(=C/C#N)/CCl                      | C22054708 | -15.04 | -1.61 | -14.82 | 4.76 | -3.37 |
| 2021 | c1c(cnc(n1)N)C=O                     | C00249481 | -15.03 | -4.52 | -15.99 | 6.77 | -1.28 |
| 2022 | c1cc(cnc1)C#N                        | C00331637 | -15.03 | 0.71  | -18.02 | 4.57 | -2.3  |
| 2023 | COc(=O)Nc1ccncc1                     | C00406333 | -15.03 | 0.08  | -19.75 | 5.49 | -0.85 |
| 2024 | c1c(nc(n1)Cl)Cl                      | C02141061 | -15.03 | -1.23 | -14.97 | 2.61 | -1.42 |
| 2025 | c1cc(c(c(c1F)C=O)O                   | C02572868 | -15.03 | -2.44 | -15.75 | 5.28 | -2.12 |
| 2026 | c1c(cnc(c1N)F)Cl                     | C08698192 | -15.03 | -1.31 | -17.8  | 3.24 | 0.84  |
| 2027 | c1ccc(c(c1)C(F)(F)F)N                | C12358767 | -15.03 | -1.09 | -15.32 | 2.43 | -1.05 |
| 2028 | CC(=O)OBr                            | C14989404 | -15.03 | -1.04 | -14.69 | 3.1  | -2.4  |
| 2029 | CC(=O)c1c(ccs1)N                     | C00159898 | -15.02 | -2.42 | -15.68 | 4.75 | -1.67 |
| 2030 | COc1ccccc1                           | C00393924 | -15.02 | -1.33 | -15.01 | 3.37 | -2.04 |
| 2031 | Cc1cccc(n1)F                         | C00403520 | -15.02 | -0.69 | -16.35 | 4.58 | -2.55 |
| 2032 | CCOc1nccs1                           | C01850626 | -15.02 | -2.07 | -15.39 | 3.25 | -0.81 |
| 2033 | C=C(CCO)Br                           | C02530726 | -15.02 | -2.4  | -14.15 | 2.17 | -0.64 |
| 2034 | c1cc(ccc1CO)N                        | C04271989 | -15.02 | -1.76 | -17.47 | 3.83 | 0.38  |
| 2035 | c1(ncc(s1)[S-])[S-]                  | C05425387 | -15.02 | -4.81 | -14.86 | 6.22 | -1.57 |
| 2036 | Cc1ccc(c(c1)O)F                      | C00403180 | -15.01 | -1.74 | -15.24 | 3.74 | -1.77 |
| 2037 | CSCc1ccco1                           | C00409334 | -15.01 | -0.3  | -14.84 | 3.58 | -3.44 |
| 2038 | c1nc([nH]n1)NN=C(C#N)C#N             | C03165161 | -15.01 | -2.11 | -18.77 | 9.54 | -3.67 |
| 2039 | C(c1nc(on1)C(F)(F)Cl                 | C12362081 | -15.01 | 1.51  | -17.46 | 2.47 | -1.53 |
| 2040 | c1cc(nn2c1nnc2)Cl                    | C00240318 | -15    | -3.46 | -15.15 | 6.95 | -3.34 |
| 2041 | c1cc(ccc1OC(=S)Cl)F                  | C00389825 | -15    | 0.2   | -16.55 | 1.92 | -0.57 |
| 2042 | c1c(c(nc(n1)Cl)N)N                   | C01677559 | -15    | -6.46 | -14.88 | 5.73 | 0.62  |
| 2043 | CCc1ccc(o1)C                         | C01995224 | -15    | -0.84 | -13.25 | 2.73 | -3.65 |
| 2044 | C1C(=O)C(=CN=C1Cl)Cl                 | C02386405 | -15    | -2.49 | -14.85 | 3.01 | -0.66 |
| 2045 | c1cc(c(cc1C#N)F)C(F)(F)F             | C02560174 | -15    | -0.48 | -14.74 | 4.34 | -4.13 |
| 2046 | C#CCn1cncn1                          | C03207447 | -15    | -2.4  | -17.68 | 7.06 | -1.99 |
| 2047 | Cc1c(non1)C#N                        | C04343170 | -15    | -0.33 | -15.46 | 2.53 | -1.73 |
| 2048 | c1cc(sc1)C(=O)N=[N+]=[N-]            | C15784786 | -15    | 1.66  | -20.87 | 3.9  | 0.3   |
| 2049 | CCCCO[N+](=O)[O-]                    | C16054440 | -15    | 0.92  | -13.54 | 1.59 | -3.97 |
| 2050 | Cc1nc(sn1)Cl                         | C19770067 | -15    | -0.13 | -15.46 | 2.14 | -1.56 |
| 2051 | c1cc(sc1)SCC#N                       | C20078165 | -15    | -0.1  | -15.44 | 4.52 | -3.98 |
| 2052 | c1c(c(ncn1)C(F)(F)F)N                | C26461821 | -15    | -2.47 | -16.71 | 5.43 | -1.25 |
| 2053 | c1ccc(c(c1)Nc2nccnc2)N)F             | C00073736 | -14.99 | -0.47 | -13.93 | 5.64 | -6.24 |
| 2054 | c1cc(ncc1N)C(F)(F)F                  | C00154421 | -14.99 | -2.62 | -16.11 | 4.96 | -1.21 |
| 2055 | c1cc(c(cc1Cl)N)O                     | C00404323 | -14.99 | -1.12 | -16.54 | 2.76 | -0.08 |
| 2056 | CC(=O)Oc1ccc(cc1)Cl                  | C00823280 | -14.99 | -0.49 | -17.32 | 4.83 | -2.01 |
| 2057 | C/(C(=C/Cl)/Cl)SC#N                  | C01639296 | -14.99 | -0.54 | -16.84 | 4.24 | -1.84 |
| 2058 | CCCC(=O)C(=O)C                       | C01663926 | -14.99 | -0.44 | -13.68 | 2.26 | -3.23 |
| 2059 | c1cc(ccc1N)SC#N                      | C01757899 | -14.99 | -0.34 | -16.44 | 3.96 | -2.17 |
| 2060 | Cc1ccsn1                             | C02031401 | -14.99 | -1.28 | -15.29 | 3.55 | -1.97 |
| 2061 | C=Cc1cccc(c1)N                       | C02566109 | -14.99 | -0.14 | -14.62 | 2.35 | -2.58 |
| 2062 | C=C(CSC(=NH2+))[S-]Cl                | C05426445 | -14.99 | -0.56 | -17.06 | 1.76 | 0.87  |
| 2063 | c1cnc(cc1C#N)F                       | C12359106 | -14.99 | -0.55 | -17.13 | 4.82 | -2.12 |
| 2064 | CCc1c(cccn1)O                        | C15951910 | -14.99 | -1.25 | -16.52 | 3.88 | -1.1  |
| 2065 | c1cc(c(cc1O)N)N                      | C00388397 | -14.98 | -3.01 | -18.69 | 4.21 | 2.52  |
| 2066 | c1ccc(cc1)CCO                        | C00895934 | -14.98 | -1.22 | -14.19 | 2.49 | -2.06 |

|      |                                 |           |        |       |        |       |       |
|------|---------------------------------|-----------|--------|-------|--------|-------|-------|
| 2067 | COc1c(ccc(c1F)F)F               | C02382167 | -14.98 | 0.05  | -16.5  | 4.2   | -2.74 |
| 2068 | c1(c(n[nH]n1)N)C(=O)NN          | C04878416 | -14.98 | -6.5  | -17.51 | 5.71  | 3.33  |
| 2069 | COc1nc(sn1)N                    | C17045321 | -14.98 | -4.07 | -16.37 | 4     | 1.45  |
| 2070 | c1c(nc(c1Br)N)O                 | C21981813 | -14.98 | -3.55 | -17.9  | 5.88  | 0.59  |
| 2071 | C1CC(=O)NN=C1C(=O)Cl            | C32016271 | -14.98 | -1.96 | -17.44 | 4.8   | -0.37 |
| 2072 | c1cc2c(cc[nH]2)cc1F             | C00388684 | -14.97 | -1.4  | -14.6  | 4.44  | -3.41 |
| 2073 | COc1c(c(c(c1F)F)F)F             | C01583745 | -14.97 | 0.04  | -12.73 | 1.55  | -3.84 |
| 2074 | c1c(nc(n1)Cl)[N+](=O)[O-]       | C01607263 | -14.97 | 0.11  | -17.73 | 2.74  | -0.08 |
| 2075 | c1ncncn1                        | C01718513 | -14.97 | -0.86 | -14.76 | 3.5   | -2.85 |
| 2076 | c1nc(c(c(n1)N)[N+](=O)[O-])N    | C04087396 | -14.97 | -0.76 | -17.8  | 4.3   | -0.71 |
| 2077 | c1c(cnc(n1)[O-])[N+](=O)[O-]    | C17174457 | -14.97 | -3.05 | -18.58 | 4.71  | 1.96  |
| 2078 | COC(=O)Cn1cncn1                 | C19993817 | -14.97 | -3.25 | -16.78 | 6.36  | -1.3  |
| 2079 | CCc1[nH]cc(n1)Br                | C22001002 | -14.97 | -2.04 | -14.78 | 4.28  | -2.42 |
| 2080 | c1cnc2cncn2c1                   | C00389493 | -14.96 | -3.62 | -17.4  | 10.55 | -4.5  |
| 2081 | COC(=O)/C=C/C=C                 | C02004075 | -14.96 | -1.05 | -15.66 | 3.99  | -2.24 |
| 2082 | c1cc(c(cc1F)O)O                 | C02244021 | -14.96 | -3.47 | -16.25 | 4.46  | 0.3   |
| 2083 | Cc1[nH]cc(n1)I                  | C02583967 | -14.96 | -3.88 | -13.82 | 5.09  | -2.35 |
| 2084 | C(OC(=O)Cl)Cl                   | C04521315 | -14.96 | -1.63 | -14.22 | 2.88  | -1.98 |
| 2085 | c1ccc(cc1)COC(=O)N              | C32914677 | -14.96 | -0.49 | -17.15 | 4.63  | -1.95 |
| 2086 | c1cc2c(cc[nH]2)c(c1)F           | C00403104 | -14.95 | -1.78 | -14.99 | 5.24  | -3.24 |
| 2087 | CCSc1cccc1                      | C01674079 | -14.95 | -0.94 | -11.4  | 2.22  | -4.84 |
| 2088 | C=CCOC=C                        | C01693372 | -14.95 | -0.3  | -14.5  | 1.99  | -2.14 |
| 2089 | Cc1ccc(nc1)NC(=S)N              | C05553560 | -14.95 | 0.5   | -17.58 | 4.56  | -2.42 |
| 2090 | c1ccc(cc1)N)F                   | C12649839 | -14.95 | -1.73 | -12.13 | 1.64  | -2.73 |
| 2091 | Cc1ccc(c(c1)N)CC#N              | C16678028 | -14.95 | -3.62 | -13.83 | 5.74  | -3.24 |
| 2092 | CSc1nnc(s1)N                    | C18252372 | -14.95 | -2.92 | -13.91 | 2.65  | -0.77 |
| 2093 | c1csc1C[NH2+]N                  | C19399364 | -14.95 | 1     | -18    | 2.67  | -0.62 |
| 2094 | CCc1ccc(cc1)S                   | C19735107 | -14.95 | -1.04 | -10.77 | 1.44  | -4.58 |
| 2095 | Cc1ccc(o1)CN=C=O                | C22861425 | -14.95 | -1.39 | -16.84 | 4.16  | -0.88 |
| 2096 | C1CC(=O)N(C1)CCN=C=O            | C32005302 | -14.95 | -2.33 | -19.18 | 6.91  | -0.35 |
| 2097 | CCc1cc(ccc1O)F                  | C02539743 | -14.94 | -1.1  | -14.17 | 2.74  | -2.42 |
| 2098 | Cc1cncnc1Cl                     | C02599069 | -14.94 | -1.68 | -12.96 | 2.57  | -2.86 |
| 2099 | c1cc(ccc1N)Sc2[nH]nnc2          | C19845532 | -14.94 | -3.21 | -15.58 | 6.64  | -2.79 |
| 2100 | c1c(c(cnc1Cl)Br)N               | C29786621 | -14.94 | -4.14 | -13.23 | 3.71  | -1.27 |
| 2101 | Cc1ccc(cc1)I                    | M1995A021 | -14.94 | -0.23 | -11.28 | 1.3   | -4.73 |
| 2102 | c1ccc(cc1)NCl                   | C01556464 | -14.93 | -2.32 | -14.47 | 1.9   | -0.03 |
| 2103 | c1cc(c2nncn2c1)N                | C01705761 | -14.93 | -3.45 | -17.1  | 8.43  | -2.81 |
| 2104 | Cc1c([n+](on1)[O-])C(=O)N       | C01761229 | -14.93 | -4.08 | -16.4  | 5.33  | 0.22  |
| 2105 | C=CCOC(C(F)F)F                  | C01997107 | -14.93 | -0.81 | -13.99 | 2.65  | -2.79 |
| 2106 | c1ccc(cc1)F)N                   | C02506896 | -14.93 | -3.09 | -16.31 | 4.99  | -0.52 |
| 2107 | c1c(c([n-]n1)C(F)F)F)N(=O)[O-]  | C04243631 | -14.93 | -2.18 | -15.32 | 4.47  | -1.9  |
| 2108 | c1nnc2n1[C@H](N=N2)[N+](=O)[O-] | C04343693 | -14.93 | 0.05  | -17.66 | 6.67  | -3.95 |
| 2109 | Cn1c(nnn1)N(C)N=O               | C05052880 | -14.93 | -0.91 | -15.97 | 3.97  | -2.02 |
| 2110 | c1c(scn1)CCO                    | C14766019 | -14.93 | -2.77 | -16.37 | 4.02  | 0.19  |
| 2111 | Cc1cncn1)N                      | C16124478 | -14.93 | -2.47 | -16.47 | 4.33  | -0.31 |
| 2112 | c1ccc(cc1)OS                    | C19597470 | -14.93 | -1.58 | -17.06 | 5.09  | -1.39 |
| 2113 | C(O)c1cccc1                     | W2004A007 | -14.93 | -1.22 | -14.14 | 2.5   | -2.07 |
| 2114 | c1c[nH]c(=O)cc1C(F)F)F          | C00132769 | -14.92 | -4.8  | -16.48 | 8.19  | -1.83 |
| 2115 | c1cc(ccc1C#N)Br                 | C00164599 | -14.92 | -1.14 | -15.6  | 3.19  | -1.37 |
| 2116 | c1cc(ccc1)Cl)N=C=O              | C01707959 | -14.92 | -2.2  | -14.19 | 2.18  | -0.72 |
| 2117 | c1cc(c(cc1C#N)F)O               | C02558778 | -14.92 | -0.65 | -17.99 | 5.2   | -1.47 |
| 2118 | CC(=C)C(=O)OCC#C                | C02563333 | -14.92 | 0.65  | -16.31 | 4.47  | -3.74 |
| 2119 | c1cc(ncc1C(F)F)F)F              | C03880144 | -14.92 | -1.37 | -14.25 | 3.09  | -2.39 |
| 2120 | c1cnc([nH]1)NN                  | C08628559 | -14.92 | -4.1  | -15.99 | 6.38  | -1.21 |
| 2121 | c1c(csn1)C=O                    | C20443581 | -14.92 | -2.05 | -16.72 | 5.12  | -1.27 |
| 2122 | c1ccc(cc1)CNC(=S)C(=O)N         | C20522688 | -14.92 | -2.83 | -17.2  | 6.23  | -1.12 |
| 2123 | Fc1ccc(cc1)CCO                  | W2004A006 | -14.92 | -1.67 | -14.06 | 2.91  | -2.09 |
| 2124 | CC(=S)Nc1cccc1                  | C00337295 | -14.91 | -0.9  | -16.57 | 6.39  | -3.83 |
| 2125 | c1cc(c(c(c1)Cl)F)N              | C00403487 | -14.91 | -1.07 | -14.89 | 3.28  | -2.22 |
| 2126 | CC(=O)c1ccc1                    | C00410301 | -14.91 | -0.83 | -15.63 | 4.59  | -3.05 |
| 2127 | c1cnc(c1)CCBr                   | C00807146 | -14.91 | -1.8  | -13.58 | 3.48  | -3.01 |
| 2128 | C=CCOC(=O)CCl                   | C01677158 | -14.91 | -1.13 | -14.77 | 4.25  | -3.26 |
| 2129 | C#Cc1ccc(cc1)C=O                | C02548316 | -14.91 | 0.51  | -17.43 | 6.04  | -4.01 |
| 2130 | c1c(nc(n1)Cl)NN=O               | C06524481 | -14.91 | -1.74 | -17.98 | 5.14  | -0.33 |
| 2131 | CNc1cncn1                       | C14987933 | -14.91 | -2.14 | -16.46 | 4.24  | -0.55 |
| 2132 | [H]N=c1[nH]c(cs1)O              | C16969925 | -14.91 | -4.7  | -15.3  | 3.43  | 1.65  |
| 2133 | c1ccc(cc1)COC(=O)CO             | C00395587 | -14.9  | -0.17 | -19.83 | 7.75  | -2.64 |
| 2134 | c12c([nH]c(=O)c(=O)[nH]1)non2   | C01235037 | -14.9  | 0.71  | -20.42 | 4.7   | 0.11  |
| 2135 | Cc1ccc(o1)[N+](=O)[O-]          | C01693511 | -14.9  | -2.44 | -17.16 | 6.29  | -1.59 |
| 2136 | C[C@H](c1cccc1)O                | C02539887 | -14.9  | -1.52 | -15.93 | 3.26  | -0.71 |
| 2137 | c1cnc1C(=S)N                    | C02565045 | -14.9  | -2.69 | -18.15 | 6.98  | -1.03 |
| 2138 | CCn1cc(n1)C=O                   | C04255822 | -14.9  | -2.71 | -16.09 | 6.24  | -2.34 |
| 2139 | CC/C=C/C(=O)Cl                  | C04269657 | -14.9  | -1.14 | -15.19 | 2.69  | -1.26 |
| 2140 | C=Cn1nc(nn1)N                   | C05853295 | -14.9  | -3.44 | -16.57 | 5.77  | -0.66 |
| 2141 | c1c(cnc2c1nc[n-]2)C#N           | C08417966 | -14.9  | -1.66 | -18.36 | 8.05  | -2.93 |
| 2142 | c1cc(=O)[nH]cc1Cl               | C08698076 | -14.9  | -2.2  | -18.35 | 7.04  | -1.39 |
| 2143 | CC(=O)c1ccns1                   | C12650017 | -14.9  | -2.21 | -14.78 | 4.01  | -1.92 |
| 2144 | c1cc2c(cc1C#N)nsn2              | C30714676 | -14.9  | -2.85 | -14.75 | 4.79  | -2.09 |
| 2145 | c1c(n2c(cn1)nnn2)N              | C01585670 | -14.89 | -4.35 | -18.31 | 7.24  | 0.53  |
| 2146 | C(#N)c1c(c(c(c1F)F)F)F          | C01845698 | -14.89 | 1.33  | -13.94 | 2.3   | -4.59 |
| 2147 | Cc1cp[nH]n1                     | C03957206 | -14.89 | -1.92 | -15.35 | 2.4   | -0.03 |
| 2148 | c1ccc(nc(c1)F)F                 | C16159557 | -14.89 | 0.31  | -16.28 | 3.82  | -2.75 |
| 2149 | c1cnc(c1)/C=N)N                 | C17174158 | -14.89 | -2.53 | -15.54 | 4.53  | -1.35 |
| 2150 | c1cnc(n1)CCCl                   | C19089269 | -14.89 | 0.11  | -16.19 | 5.11  | -3.92 |
| 2151 | c1cc(sc1)CNC(=O)N               | C00090725 | -14.88 | 0.36  | -21.63 | 6.14  | 0.24  |
| 2152 | c1cnc2c1sc2                     | C00334174 | -14.88 | -2.09 | -16.59 | 3.65  | 0.16  |
| 2153 | CCOCn1cncn1                     | C05905381 | -14.88 | -2.27 | -17.14 | 4.63  | -0.1  |
| 2154 | c1c(cnc(n1)C(F)F)F)Br           | C26440925 | -14.88 | -1.65 | -13.4  | 2.97  | -2.8  |
| 2155 | c1c(c(cc(c1O)F)F)N              | C00168054 | -14.87 | -2.81 | -16.23 | 3.81  | 0.36  |
| 2156 | c1ccc(cc1)NO                    | C00901466 | -14.87 | -3.24 | -16.71 | 6     | -0.91 |

|      |                                   |           |        |       |        |       |       |
|------|-----------------------------------|-----------|--------|-------|--------|-------|-------|
| 2157 | c1cc(ncc1C(F)(F)F)N[N+](=O)[O-]   | C01231988 | -14.87 | -1.9  | -16.18 | 6.89  | -3.69 |
| 2158 | c1cscc1Br                         | C01626895 | -14.87 | -1.16 | -15.33 | 1.48  | 0.13  |
| 2159 | C=COC(=O)CCI                      | C02507818 | -14.87 | -2.1  | -14.3  | 4.4   | -2.88 |
| 2160 | [H]/N=C\1/n(ccs1)CC               | C04105137 | -14.87 | -1.84 | -14.3  | 4.06  | -2.79 |
| 2161 | COC(=O)Nc1ccc(c(c1)F)F            | C05526236 | -14.87 | -0.58 | -19.29 | 7.21  | -2.22 |
| 2162 | c1cc(ncc1)Cl                      | C08764173 | -14.87 | -2.7  | -16.12 | 5.62  | -1.67 |
| 2163 | c1cc(=O)[nH]cc1Br                 | C08772776 | -14.87 | -2.09 | -18.24 | 6.93  | -1.47 |
| 2164 | CCCc1nc([nH]n1)N                  | C13639955 | -14.87 | -3.02 | -14.56 | 5.13  | -2.41 |
| 2165 | CCSSSS                            | C14590161 | -14.87 | 0.63  | -11.25 | 1.6   | -5.86 |
| 2166 | CNN=Cc1cccnc1                     | C17062281 | -14.87 | -0.2  | -16.95 | 4.14  | -1.85 |
| 2167 | c1cncc(c1C(F)(F)F)[O-]            | C19616318 | -14.87 | 0.14  | -17.11 | 3.08  | -0.98 |
| 2168 | Cc1cnc(nc1)F                      | C22016534 | -14.87 | -2.06 | -16.29 | 5.43  | -1.94 |
| 2169 | Cc1ncc(cn1)N                      | C01644845 | -14.86 | -3.43 | -15.76 | 4.63  | -0.29 |
| 2170 | c1cc(ncc1C#N)NN=O                 | C13213275 | -14.86 | -3.24 | -18.06 | 8.06  | -1.63 |
| 2171 | Cc1ccc(o1)CCI                     | C20077984 | -14.86 | -1.1  | -13.46 | 3.28  | -3.58 |
| 2172 | CCNC(=O)c1c(non1)N                | C01295889 | -14.85 | -0.27 | -17.89 | 3.27  | 0.04  |
| 2173 | COC1c(cc(c1)F)Nf                  | C02527833 | -14.85 | 0.21  | -18.11 | 4.46  | -1.41 |
| 2174 | C1COC=C1C(=O)C(F)(F)F             | C02568770 | -14.85 | -0.89 | -15.4  | 3.68  | -2.24 |
| 2175 | c1cc(ncc1O)Br                     | C02599016 | -14.85 | -3.28 | -15.47 | 4.1   | -0.19 |
| 2176 | CN(C(=O)NC(=O)N)C(=O)N=O          | C04887722 | -14.85 | -0.84 | -19.86 | 5.9   | -0.05 |
| 2177 | CC(=O)O/C=C\O/C(=O)C              | C05029577 | -14.85 | -1.02 | -17.43 | 7.21  | -3.61 |
| 2178 | c1c(ncc(=O)[nH]1)Br               | C06732065 | -14.85 | -2.51 | -18.32 | 6.11  | -0.12 |
| 2179 | c1c(c(cnc1Cl)[N+](=O)[O-])N       | C15021890 | -14.85 | -3.79 | -14.45 | 4.69  | -1.3  |
| 2180 | CCc1ccc(o1)[N+](=O)[O-]           | C15784475 | -14.85 | -1.53 | -15.75 | 5.98  | -3.55 |
| 2181 | Cc1nc(cs1)C(=O)C                  | C15855283 | -14.85 | -1.43 | -15.6  | 4.51  | -2.33 |
| 2182 | c1cc2c(cc1F)CCO2                  | C16159654 | -14.85 | -1.31 | -13.21 | 2.93  | -3.27 |
| 2183 | CSc1ccccc1F                       | C00404215 | -14.84 | 0.09  | -17.78 | 4.04  | -1.2  |
| 2184 | Cc1cc(=O)n(c(n1)N)N               | C00497576 | -14.84 | -6.86 | -14.29 | 7.21  | -0.9  |
| 2185 | c1c(nc2n1CCC2)Cl                  | C00497776 | -14.84 | -0.39 | -17.31 | 6.45  | -3.58 |
| 2186 | Cn1cncnc1                         | C01095289 | -14.84 | -0.67 | -14.76 | 4.07  | -3.48 |
| 2187 | C=CCCCO                           | C01845660 | -14.84 | -2.72 | -12.95 | 1.98  | -1.14 |
| 2188 | c1cc(ccc1OCC)Cl                   | C02242619 | -14.84 | 1.01  | -18.06 | 2.74  | -0.53 |
| 2189 | c1cc(sc1C(=O)N)Cl                 | C02753342 | -14.84 | -2.51 | -16.16 | 4.47  | -0.65 |
| 2190 | COnc1cnc1                         | C05285697 | -14.84 | -1.54 | -15.63 | 4.62  | -2.29 |
| 2191 | c1cc(ncc1C#N)I                    | C12471965 | -14.84 | -1.83 | -13.9  | 3.97  | -3.08 |
| 2192 | c1cc(cc(c1)Cl)NC(=S)NN            | C13685566 | -14.84 | -1.04 | -14.85 | 3.82  | -2.78 |
| 2193 | [H]/N=C(N)NNC(=O)C(F)(F)F         | C20157005 | -14.84 | -0.82 | -19.51 | 5.75  | -0.26 |
| 2194 | c1c[nH+]ccc1ON                    | C21985253 | -14.84 | -1.5  | -17.32 | 4.24  | -0.25 |
| 2195 | Oc1c(cccc1)O                      | G2005A001 | -14.84 | -3.2  | -16.49 | 4.57  | 0.28  |
| 2196 | c1cc(c(nc1)I)O                    | C00160343 | -14.83 | -1.37 | -17.14 | 4.44  | -0.76 |
| 2197 | CC(=O)c1cccnc1                    | C01607046 | -14.83 | -2.44 | -16.84 | 5.46  | -1.01 |
| 2198 | c1cnc(cc1)Cl                      | C02526715 | -14.83 | -1.06 | -16.29 | 3.05  | -0.54 |
| 2199 | C(=N/O)Nc1nnc(s1)C(F)(F)F         | C04300298 | -14.83 | -2.89 | -19.04 | 8.57  | -1.47 |
| 2200 | COC(=O)O/N=C/c1c(non1)N)N         | C04843969 | -14.83 | -0.91 | -17.15 | 4.49  | -1.26 |
| 2201 | COCc1cn[nH]n1                     | C05502939 | -14.83 | -3.31 | -15.64 | 3.69  | 0.42  |
| 2202 | c1cn2c(n1)NCCC2                   | C11920167 | -14.83 | -1.11 | -16.35 | 6.05  | -3.42 |
| 2203 | CCO[N+](=O)[O-]                   | C16893044 | -14.83 | -1.02 | -13.12 | 1.98  | -2.67 |
| 2204 | c1cc(ccc1N)Oc2[nH]nn2             | C19090679 | -14.83 | -1.03 | -22.05 | 7.01  | 1.23  |
| 2205 | c1cc(ccc1F)COF                    | C00409279 | -14.82 | -0.02 | -16.4  | 3.08  | -1.48 |
| 2206 | c1c(csc1[N+](=O)[O-])C#N          | C00143162 | -14.81 | -1.78 | -16.52 | 7.01  | -3.51 |
| 2207 | c1cc(oc1)/C=C/C(=O)Cl             | C02568191 | -14.81 | 0.29  | -15.89 | 4.18  | -3.39 |
| 2208 | c1ccc2c(c1)C[C@H]2O               | C03107553 | -14.81 | -1.69 | -14.82 | 3.5   | -1.81 |
| 2209 | c1ccc(cc1)CCCN=O                  | C05773267 | -14.81 | -3.04 | -15.8  | 4.09  | -0.06 |
| 2210 | c1c(c[nH]1)CCCl                   | C19089888 | -14.81 | -0.67 | -16    | 4.06  | -2.19 |
| 2211 | c1cc(ccc1CCO)F                    | C00388332 | -14.8  | -1.71 | -13.89 | 2.89  | -2.1  |
| 2212 | c1cc(cc(c1)N)C#N                  | C00388409 | -14.8  | -0.09 | -16.72 | 4.08  | -2.07 |
| 2213 | CC(=O)Oc1ccccc1F                  | C02567799 | -14.8  | 1.79  | -19.31 | 7.09  | -4.36 |
| 2214 | COc1cnc(nc1)N                     | C03123156 | -14.8  | -2.87 | -15.16 | 4.23  | -0.99 |
| 2215 | c1(nnc(o1)C(F)(F)F)C(F)(F)F       | C04329254 | -14.8  | 0.6   | -17.15 | 1.32  | 0.43  |
| 2216 | Cc1ccoc1C                         | C05239577 | -14.8  | -0.93 | -13.73 | 2.81  | -2.94 |
| 2217 | CSc1nc([nH]n1)Cl                  | C06425446 | -14.8  | -3.81 | -16.28 | 3.75  | 1.54  |
| 2218 | Cc1ccc(o1)C(F)(F)F                | C15442277 | -14.8  | -2.24 | -12.11 | 2.92  | -3.37 |
| 2219 | c1c(nns1)C(=O)N=[N+]=[N-]         | C17173515 | -14.8  | -1.6  | -19.35 | 3.99  | 2.15  |
| 2220 | c1(c(nsn1)N)C(=O)NN               | C17322776 | -14.8  | -5.36 | -17.69 | 5.29  | 2.95  |
| 2221 | c1ccc2c(c1)ccs2                   | C01679161 | -14.79 | -1.48 | -12.02 | 3.09  | -4.38 |
| 2222 | C/C(=C/(C#N)\[N+](=O)[O-])/N      | C16951772 | -14.79 | -2.15 | -15.58 | 3.3   | -0.36 |
| 2223 | Cc1ccsc1N=C=O                     | C19503704 | -14.79 | -1.22 | -13.93 | 2.19  | -1.83 |
| 2224 | c1cnccc1C=O                       | C20441048 | -14.79 | -2.7  | -18.17 | 7.06  | -0.98 |
| 2225 | COC(=O)[C@@H]1C[C@H]1[N+](=O)[O-] | C32627893 | -14.79 | -1.2  | -16.65 | 6.1   | -3.04 |
| 2226 | c1cc(ccc1F)F(=O)Cl                | C02140809 | -14.78 | -1.28 | -15.54 | 4.06  | -2.02 |
| 2227 | c1ccc2c(c1)C[C@@H]2C#N            | C02140856 | -14.78 | -1.45 | -13.89 | 5.19  | -4.63 |
| 2228 | CCCON=O                           | C04262304 | -14.78 | -0.61 | -13.23 | 1.91  | -2.85 |
| 2229 | c1(nnc(n1)N)N                     | C04558148 | -14.78 | -3.44 | -17.64 | 4.44  | 1.86  |
| 2230 | c1c(nc[nH]1)Cl                    | C04771902 | -14.78 | -3.16 | -14.16 | 4.49  | -1.96 |
| 2231 | CC(=O)CCC(=O)C=C                  | C05283399 | -14.78 | 0.17  | -17.71 | 4.58  | -1.82 |
| 2232 | c1c(c([nH]1)C(=O)Cl)Br            | C12357572 | -14.78 | 1.03  | -17.51 | 3.23  | -1.53 |
| 2233 | c1c(cnc(c1)N)Cl                   | C19230138 | -14.78 | -0.43 | -14.98 | 2.51  | -1.89 |
| 2234 | c1(nnc(s1)Cl)C(F)(F)F             | C21304390 | -14.78 | -1.76 | -13.7  | 2.54  | -1.87 |
| 2235 | c1nc(nc(n1)N)N                    | C22126365 | -14.78 | -3.57 | -16.41 | 7.2   | -2    |
| 2236 | c1cc(ccc1)F)CO                    | C00388395 | -14.77 | -1.22 | -16.07 | 3.82  | -1.3  |
| 2237 | COc1ccc(c(c1)F)F                  | C00409288 | -14.77 | -2.2  | -12.81 | 3.2   | -2.95 |
| 2238 | C1=CC(=O)C=CC1=O                  | C00895247 | -14.77 | -0.04 | -17    | 4.3   | -2.04 |
| 2239 | Cn1cnc1Br                         | C01437392 | -14.77 | -0.76 | -15.06 | 4.26  | -3.2  |
| 2240 | C=CCOCC=C                         | C01683669 | -14.77 | -0.36 | -13.43 | 1.59  | -2.57 |
| 2241 | C=Cc1ccccc1                       | C01769022 | -14.77 | -1.42 | -13.66 | 3.41  | -3.1  |
| 2242 | COC(=O)CCN=C=O                    | C02569575 | -14.77 | -0.41 | -17.81 | 3.92  | -1.48 |
| 2243 | c1ccc2c(c1)cc([nH]2)C#N           | C03123101 | -14.77 | -0.99 | -16.36 | 3.65  | -0.88 |
| 2244 | c1c([nH]c(=O)[nH]c1=O)N=C=S       | C03218501 | -14.77 | -1.35 | -19.95 | 6.64  | -0.11 |
| 2245 | c1(nc2[nH]nc(n2)N)N               | C05388813 | -14.77 | -3.12 | -20.5  | 5.79  | 3.06  |
| 2246 | c1c(cnc2c(n1)ncn2)N               | C18556069 | -14.77 | -3.77 | -18.77 | 10.26 | -2.49 |



|      |                                  |           |        |       |        |       |       |
|------|----------------------------------|-----------|--------|-------|--------|-------|-------|
| 2247 | Cc1ccsc1CCI                      | C20077986 | -14.77 | -0.6  | -12.22 | 2.19  | -4.15 |
| 2248 | C1=C2[C@H](N=CN=C2N=N1)N         | C20230332 | -14.77 | -1.68 | -18.38 | 4.03  | 1.25  |
| 2249 | C1CCC(C1)SC#N                    | C30714930 | -14.77 | 0.22  | -14.08 | 2.73  | -3.64 |
| 2250 | c1ccc(c(c1)CON)F                 | C00168989 | -14.76 | 2.84  | -18.89 | 3.17  | -1.88 |
| 2251 | Cc1ccc([nH]1)C                   | C01673420 | -14.76 | -1.18 | -13.61 | 2.69  | -2.66 |
| 2252 | C1C[C@H](CC=C1)C(=O)Cl           | C02560420 | -14.76 | 0.13  | -13.22 | 2.07  | -3.74 |
| 2253 | CC1=CC(=O)CC(=O)O1               | C04273393 | -14.76 | -2.57 | -15.49 | 5.91  | -2.61 |
| 2254 | CCOC(=O)N(C)N=O                  | C04403799 | -14.76 | -1.02 | -16.54 | 3.42  | -0.62 |
| 2255 | CCOC(=O)c1c[nH]cn1               | C13281753 | -14.76 | -0.66 | -18.21 | 6.99  | -2.88 |
| 2256 | Cn1cccc/c1=N/N                   | C17109865 | -14.76 | -2.17 | -14.33 | 4.1   | -2.36 |
| 2257 | c1ccc(c(c1)Cn2c(ccn2)N)F         | C19392567 | -14.76 | 1.92  | -18.28 | 5.52  | -3.92 |
| 2258 | c1cnc(nc1)CC#N                   | C31829581 | -14.76 | -0.81 | -19.1  | 7.44  | -2.29 |
| 2259 | c2cc1ccccc1s2                    | M1995A030 | -14.76 | -1.65 | -11.81 | 3.08  | -4.37 |
| 2260 | c1csc1/C=C/[N+](=O)[O-]          | C00101093 | -14.75 | 0.92  | -16.41 | 4.92  | -4.18 |
| 2261 | C(CO)NC(=O)c1c(non1)N            | C02491560 | -14.75 | -5.59 | -17.54 | 4.96  | 3.41  |
| 2262 | Cc1cc(ccc1O)N)F                  | C02540120 | -14.75 | -3    | -14.8  | 3.3   | -0.24 |
| 2263 | COC(=O)C(=[N+]=[N-])C(F)(F)F     | C04268757 | -14.75 | 0.46  | -16.74 | 2.76  | -1.22 |
| 2264 | c1cnn(c1)C(=O)CCI                | C04992598 | -14.75 | -2.81 | -15.05 | 5.23  | -2.12 |
| 2265 | C(CO)C(=C(F)F)F                  | C08698326 | -14.75 | -2.79 | -13.69 | 2.1   | -0.38 |
| 2266 | COc1cc(cnc1)N                    | C14982096 | -14.75 | -2.04 | -16.95 | 4.18  | 0.05  |
| 2267 | c1cc(=O)[nH]c(c1)Cl              | C00388230 | -14.74 | -1.28 | -18.04 | 6     | -1.41 |
| 2268 | c1cc(cc1CC)[N+](=O)[O-]          | C01621103 | -14.74 | -3.17 | -16.92 | 6.69  | -1.33 |
| 2269 | C=C(C(=O)OCC(C(F)(F)F)(F)F)F     | C02573961 | -14.74 | 0.09  | -13.49 | 3.68  | -5.01 |
| 2270 | C(C(=O)Cl)(Cl)Cl                 | C04261781 | -14.74 | 0.43  | -14.75 | 1.78  | -2.2  |
| 2271 | Cn1c(ccn1)[N+](=O)[O-]           | C06072268 | -14.74 | 1.83  | -17.98 | 4.3   | -2.88 |
| 2272 | c1ccc(c(c1)C)N)F                 | C19171896 | -14.74 | 0.76  | -18.47 | 4.33  | -1.37 |
| 2273 | c1nnc(s1)SCC#N                   | C19847667 | -14.74 | -1.86 | -17.56 | 6.53  | -1.84 |
| 2274 | c1ccc2c(c1)csn2                  | C26479250 | -14.74 | -1.78 | -14.67 | 4.91  | -3.21 |
| 2275 | c1(c(nc(nc1)F)C(F)(F)F)F         | C02540464 | -14.73 | 0.37  | -12.87 | 0.71  | -2.94 |
| 2276 | c1csc(n1)C(=O)CBr                | C04277256 | -14.73 | 0.91  | -17.77 | 4.37  | -2.24 |
| 2277 | CS/C(=C/C(=O)C(F)(F)F)/[O-]      | C04521881 | -14.73 | -1.33 | -14.12 | 2.32  | -1.59 |
| 2278 | Cc1c(c(n[nH]1)C#N)N              | C04878135 | -14.73 | -1.95 | -16.9  | 4.2   | -0.08 |
| 2279 | c1cc(cc(c1)F)N=[N+]=[N-]         | C12505577 | -14.73 | 0.13  | -15.63 | 2.5   | -1.73 |
| 2280 | c1ccc2c(c1)C/C2=N/O              | C13407686 | -14.73 | -4.15 | -13.32 | 4.73  | -2    |
| 2281 | c1(c(nc([nH]1)Cl)[N+](=O)[O-])Cl | C17042366 | -14.73 | -2.35 | -12.22 | 3.02  | -3.18 |
| 2282 | c1cc(c(nc1)Br)O                  | C00157191 | -14.72 | -1.44 | -17.77 | 4.9   | -0.41 |
| 2283 | Cc1ccc(cc1N)Cl                   | C00157612 | -14.72 | -3.96 | -10.24 | 2.18  | -2.69 |
| 2284 | c1cc(ccc1C#N)N=C=O               | C00159625 | -14.72 | -2.26 | -14.28 | 3.97  | -2.15 |
| 2285 | c1cc(c(cc1N=C=O)Cl)Cl            | C01707972 | -14.72 | -2.24 | -11.74 | 1.74  | -2.49 |
| 2286 | CCC(=O)SCC=C                     | C01850438 | -14.72 | -0.43 | -15.68 | 2.6   | -1.21 |
| 2287 | C/C=C/C=C/C(=O)Cl                | C02507466 | -14.72 | 0.33  | -14.49 | 2.99  | -3.55 |
| 2288 | c1cc(c(cc1N=C=O)C(F)(F)F)F       | C02568131 | -14.72 | -2.77 | -11.76 | 2.75  | -2.94 |
| 2289 | c1ccc(c(c1)C(=N/O)/N)O           | C06322753 | -14.72 | -3.84 | -17.75 | 5.97  | 0.89  |
| 2290 | Cc1ccc(nc1)C#N                   | C15903639 | -14.72 | -0.83 | -16.49 | 5.41  | -2.82 |
| 2291 | c1ccc(sc1CCl)Br                  | C20077998 | -14.72 | -1.57 | -11.07 | 2.14  | -4.22 |
| 2292 | c1c(cc(c(c1)F)Cl)F)N             | C22011423 | -14.72 | 0.22  | -17.77 | 4.99  | -2.16 |
| 2293 | c1cc(c(cc1CO)F)F                 | C00164814 | -14.71 | -2.16 | -15.92 | 4.68  | -1.32 |
| 2294 | Cc1ccc(cc1)OC(F)F                | C00167171 | -14.71 | 1.08  | -17.72 | 3.94  | -2    |
| 2295 | c1cc(c(cc1Cl)O)O                 | C00388291 | -14.71 | -2.15 | -16.68 | 4.13  | -0.01 |
| 2296 | CC(=[N+]=[N-])C                  | C01575618 | -14.71 | -1.91 | -14.89 | 5.19  | -3.1  |
| 2297 | C=C(C)C#N                        | C01759957 | -14.71 | -2.18 | -13.73 | 3.25  | -2.05 |
| 2298 | COC(=O)C(F)(F)F                  | C02040619 | -14.71 | -1.72 | -13.18 | 2.13  | -1.94 |
| 2299 | c1c(cc(c(c1O)Br)F)F              | C02575683 | -14.71 | -0.6  | -16.72 | 2.6   | 0.01  |
| 2300 | c1cc(c(cc1N)C#N)N                | C05200429 | -14.71 | -3.02 | -15.54 | 4.27  | -0.41 |
| 2301 | COc1cccnc1                       | C13213189 | -14.71 | -0.85 | -15.8  | 3.82  | -1.89 |
| 2302 | c1cnc(c1Br)O                     | C14982272 | -14.71 | -0.32 | -17.4  | 3.31  | -0.29 |
| 2303 | c1cc(c(c(c1)F)C(F)(F)F)N         | C16158162 | -14.71 | -2.48 | -13.65 | 3.98  | -2.57 |
| 2304 | c1cc(ncc1C#N)N                   | C19441342 | -14.71 | -3.71 | -15.73 | 6.06  | -1.33 |
| 2305 | CCNc1ccc(cn1)Cl                  | C20547374 | -14.71 | -3.51 | -11.06 | 2.69  | -2.83 |
| 2306 | c1cc(c(cc1CC#N)F)F               | C00155245 | -14.7  | -1.71 | -18.3  | 8.59  | -3.28 |
| 2307 | COc1ccncc1                       | C00330918 | -14.7  | -2.74 | -14    | 3.52  | -1.48 |
| 2308 | c1c(cc(c(c1)F)F)C#N              | C00389548 | -14.7  | 0.25  | -15.02 | 3.66  | -3.59 |
| 2309 | c1ccc(c(c1)NC(=O)N2N=N2)F        | C00401684 | -14.7  | 0.17  | -17.87 | 3.7   | -0.7  |
| 2310 | c1ccc(c(c1)/C=C/C(=O)O           | C01704590 | -14.7  | 0.08  | -21.14 | 6.48  | -0.12 |
| 2311 | c1cc(c(cc1N)CBr)F                | C02243179 | -14.7  | -0.63 | -14.41 | 3.15  | -2.81 |
| 2312 | c1(=O)[nH]c(=O)ss1               | C05339603 | -14.7  | 0.4   | -17.23 | 2.24  | -0.12 |
| 2313 | c1cc(ncc1Cl)I                    | C08698214 | -14.7  | -1.48 | -11.95 | 1.99  | -3.27 |
| 2314 | Cc1ccc(c(c1)F)N)F                | C12359260 | -14.7  | -2.75 | -13.72 | 2.48  | -0.71 |
| 2315 | C#CCn1ccc1C=O                    | C20154855 | -14.7  | -0.97 | -16.03 | 6.17  | -3.88 |
| 2316 | c1c(cnc(c1)F)C(F)(F)F            | C30714979 | -14.7  | -1.06 | -13.41 | 2.71  | -2.94 |
| 2317 | CC(=N)C1CCCC1C                   | C32601425 | -14.7  | 0.11  | -14.35 | 3.25  | -3.72 |
| 2318 | c1cc(ccc1CNC(=S)N)F              | C00069387 | -14.69 | -1.67 | -19.33 | 9.21  | -2.9  |
| 2319 | COC(=C)C=C                       | C01753295 | -14.69 | -1.21 | -13.22 | 1.78  | -2.04 |
| 2320 | C#CC[C@H](c1ccccc1)O             | C02390319 | -14.69 | -0.65 | -14.54 | 3.63  | -3.14 |
| 2321 | c1c(ccc1C=O)Br                   | C02567282 | -14.69 | -1.51 | -16.53 | 6     | -2.65 |
| 2322 | c1c(nc(s1)C=O)Br                 | C04198752 | -14.69 | -3.98 | -13.44 | 4.25  | -1.51 |
| 2323 | c1cnc2nccn2c1                    | C12350100 | -14.69 | -2.7  | -18.28 | 10.57 | -4.29 |
| 2324 | c1c(c(=O)nc([nH]1)N)C#N          | C17039866 | -14.69 | -1.79 | -20.19 | 6.05  | 1.24  |
| 2325 | CNc1ccc(cc1)F)F                  | C20050277 | -14.69 | -3.7  | -13.05 | 4.72  | -2.66 |
| 2326 | c1c(cc(cc1)F)C#N                 | C00156994 | -14.68 | 0.68  | -14.47 | 2.8   | -3.69 |
| 2327 | c1ccc(cc1)OC(=O)N                | C00404454 | -14.68 | 0.43  | -20.95 | 6.24  | -0.4  |
| 2328 | Cn1cc(nc1)Br                     | C01095271 | -14.68 | -2.33 | -14.65 | 5.66  | -3.36 |
| 2329 | c1cc(c(cc1OC(F)(F)O)F)F          | C02527816 | -14.68 | -1.47 | -14.74 | 2.79  | -1.25 |
| 2330 | c1c(ncc1)F)F                     | C02529896 | -14.68 | -1.25 | -15.1  | 2.61  | -0.95 |
| 2331 | C=CCCC(=O)Cl                     | C02569933 | -14.68 | -0.72 | -15.09 | 2.56  | -1.44 |
| 2332 | CSc1nccs1                        | C02570798 | -14.68 | -0.87 | -14.94 | 3.12  | -1.99 |
| 2333 | c1ccc(cc1)/C=C/C=N/O             | C12370146 | -14.68 | -2.22 | -17.48 | 5.21  | -0.19 |
| 2334 | c1nnc(n1)N)N                     | C17878181 | -14.68 | -4.8  | -16.21 | 8.13  | -1.79 |
| 2335 | c1cc(cc(c1)F)NC(=NH2+)N          | C26423539 | -14.68 | 0.59  | -20.11 | 7.33  | -2.48 |
| 2336 | c1cnc2c(c1)cnn2                  | C00391481 | -14.67 | -3.37 | -18.01 | 8.9   | -2.18 |

|      |                                      |           |        |       |        |      |       |
|------|--------------------------------------|-----------|--------|-------|--------|------|-------|
| 2337 | C1CC(=C1)CCO                         | C01767928 | -14.67 | -1.23 | -14.04 | 1.99 | -1.38 |
| 2338 | c1ccc2c(c1)cc([nH]2)O                | C02020050 | -14.67 | -3.57 | -14.51 | 4.06 | -0.66 |
| 2339 | c1c(cn(n1))[N+](=O)[O-]][N+](=O)[O-] | C04291308 | -14.67 | -1.57 | -14.75 | 4.12 | -2.47 |
| 2340 | CCSC(=S)N                            | C05598930 | -14.67 | -2.36 | -14.37 | 0.99 | 1.08  |
| 2341 | C1CC1c2nc(on2)CCl                    | C12803975 | -14.67 | -0.49 | -16.31 | 4.65 | -2.52 |
| 2342 | c1c(scn1)C(=O)Cl                     | C26899047 | -14.67 | -1.9  | -15.79 | 4.67 | -1.65 |
| 2343 | c1cc(cc(c1))N                        | C00013616 | -14.66 | -1.18 | -12.71 | 1.91 | -2.68 |
| 2344 | c1c(c(c(c1F)F)F)C#N                  | C00389594 | -14.66 | 1.44  | -15.61 | 3.64 | -4.13 |
| 2345 | c1cn(cn1)CCC#N                       | C02387555 | -14.66 | -2.32 | -16.72 | 8.37 | -4    |
| 2346 | c1c(cnc(c1Cl)F)Cl                    | C02525820 | -14.66 | -0.99 | -15.24 | 2.1  | -0.53 |
| 2347 | c1c(c(=O)[nH]c1=O)[nH]1)NN=O         | C04692071 | -14.66 | -4.69 | -20.38 | 7.15 | 3.26  |
| 2348 | C(#N)[NH+]=C([S-])[S-]               | C05178345 | -14.66 | -5.29 | -12.46 | 4.41 | -1.32 |
| 2349 | C(CN=[N+]=[N-])N=[N+]=[N-]           | C05178766 | -14.66 | 0.27  | -17.25 | 1.79 | 0.53  |
| 2350 | c1c(c(nc(n1)Cl)[O-])[N+](=O)[O-]     | C05286129 | -14.66 | -0.47 | -18.01 | 2.51 | 1.31  |
| 2351 | CSCc1csc(n1)N                        | C17061540 | -14.66 | -1.6  | -14.46 | 3.79 | -2.4  |
| 2352 | c1c(c([nH]1)C=N)O[N+](=O)[O-]        | C01043046 | -14.65 | -4.12 | -16.4  | 5.22 | 0.65  |
| 2353 | c1ccc2c(c1)oc(=O)o2                  | C01090559 | -14.65 | -2.17 | -14.98 | 6.23 | -3.73 |
| 2354 | CC(=O)SCCC=C                         | C01682812 | -14.65 | -0.63 | -15.45 | 2.66 | -1.23 |
| 2355 | CCSCC#C                              | C02168531 | -14.65 | -0.59 | -13.15 | 2.69 | -3.59 |
| 2356 | COC(=O)C(=C)CBr                      | C02539421 | -14.65 | -2.03 | -12.81 | 3.14 | -2.95 |
| 2357 | c1cn(nc1[N+](=O)[O-])CO              | C02552533 | -14.65 | -5.18 | -16.97 | 7.75 | -0.24 |
| 2358 | C1C(=O)N=C(S1)N                      | C03860694 | -14.65 | -2.49 | -16.03 | 3.85 | 0.01  |
| 2359 | C(=O)(C(F)F)BrF                      | C04334582 | -14.65 | -0.44 | -13.56 | 1.08 | -1.73 |
| 2360 | C/C=C/[C@H](c1ccccc1)O               | C08579442 | -14.65 | -3.97 | -11    | 3.4  | -3.09 |
| 2361 | c1cc(ncc1Br)NN                       | C08700532 | -14.65 | -4.42 | -12.64 | 3.78 | -1.37 |
| 2362 | c1c([nH]c2c1c(=O)cc[nH]2             | C12956316 | -14.65 | -4.09 | -16.05 | 6.24 | -0.76 |
| 2363 | c1c(csc1[N+](=O)[O-])Br              | C15782966 | -14.65 | -1.82 | -13.42 | 4.31 | -3.72 |
| 2364 | Fc1c(c(c(c1F)F)F)F                   | M1995A007 | -14.65 | 0.74  | -12.48 | 0.71 | -3.61 |
| 2365 | C1CON=C1[N+](=O)[O-]                 | C01584492 | -14.64 | -0.63 | -16.54 | 4.93 | -2.41 |
| 2366 | Cc1c(cnc1N)C                         | C02524881 | -14.64 | -3.67 | -14.21 | 5.01 | -1.77 |
| 2367 | c1cc2c([nH]nc2cc1N                   | C04353646 | -14.64 | -5.29 | -16.75 | 8.12 | -0.72 |
| 2368 | c1c(mns1)Br                          | C04946437 | -14.64 | -2.78 | -14.86 | 4.14 | -1.14 |
| 2369 | C1CCC(=CC1)C#CC#N                    | C05382457 | -14.64 | -0.14 | -14.69 | 2.61 | -2.41 |
| 2370 | c12[nH]nc(n1nc(n2)[O-])[N+](=O)[O-]  | C06320734 | -14.64 | -1.14 | -17.55 | 7.26 | -3.21 |
| 2371 | c1c([nH]cc1=O)N                      | C08672849 | -14.64 | -2.76 | -17.21 | 3.93 | 1.41  |
| 2372 | CCNc1ccccc1                          | C12358766 | -14.64 | -1.61 | -11.58 | 1.78 | -3.24 |
| 2373 | c1cnc([nH]c1=O)N                     | C14419854 | -14.64 | -4.76 | -17.32 | 7.98 | -0.54 |
| 2374 | C1=C(C(=O)[C@@H]2[C@H](C1=O)O2)O     | C18177957 | -14.64 | -2.11 | -18.54 | 5.16 | 0.85  |
| 2375 | C(CC)c1ccccc1N                       | W2004A011 | -14.64 | -0.51 | -12.33 | 1.78 | -3.58 |
| 2376 | c1cc(c2c(c1)[nH]n2)N                 | C00372332 | -14.63 | -5.06 | -14.87 | 5.02 | 0.29  |
| 2377 | c1cc(cnc1)CNC(=O)N                   | C00389733 | -14.63 | 0.44  | -23.37 | 7.37 | 0.93  |
| 2378 | c1cc(ccc1NC=O)Cl                     | C00409833 | -14.63 | -1.85 | -17.47 | 7.02 | -2.33 |
| 2379 | CC(=O)c1c(cccn1)N                    | C01420799 | -14.63 | 2.18  | -19.71 | 4.3  | -1.41 |
| 2380 | CC(=CCOC(=O)C)C                      | C02039792 | -14.63 | -0.12 | -16.4  | 4.03 | -2.15 |
| 2381 | [C@H](OC(=O)Cl)Cl                    | C02242593 | -14.63 | 0.75  | -15.39 | 2.62 | -2.61 |
| 2382 | Cc1ccsc1Cl                           | C02504556 | -14.63 | -0.04 | -12.85 | 1.74 | -3.47 |
| 2383 | c1cnccc1C=N/O                        | C04501411 | -14.63 | -3.09 | -17.22 | 5.88 | -0.2  |
| 2384 | c1cnccc1NC(=S)N                      | C05594608 | -14.63 | -0.38 | -18.23 | 4.47 | -0.49 |
| 2385 | c1cc(oc1)/C(=C)C(=O)C(F)F/[O-]       | C05942173 | -14.63 | -0.78 | -16.27 | 5.24 | -2.82 |
| 2386 | c1c(csc1C=N)O)Br                     | C13115191 | -14.63 | -3.34 | -13.67 | 3.76 | -1.37 |
| 2387 | CC(=O)CCC=C                          | C01867148 | -14.62 | -0.3  | -14.7  | 3.5  | -3.12 |
| 2388 | CC(=O)O/C=C/C=C                      | C02039494 | -14.62 | -0.24 | -14.96 | 4.12 | -3.54 |
| 2389 | CCOC(=O)[C@@H](F)I                   | C02379348 | -14.62 | -0.02 | -13.75 | 2.54 | -3.4  |
| 2390 | c1cc(sc1)C(=O)CCl                    | C02383794 | -14.62 | -1.54 | -14.7  | 5.19 | -3.57 |
| 2391 | C(C(C(F)F)F)F)OC(F)F                 | C02560089 | -14.62 | -0.89 | -12.57 | 2.85 | -4.02 |
| 2392 | Cc1c(cno1)I                          | C04277305 | -14.62 | -0.74 | -13.53 | 2.48 | -2.82 |
| 2393 | C(C(=O)N)O/N=C(/c1c(non1)N)N         | C04418887 | -14.62 | -3.53 | -22.38 | 8.55 | 2.74  |
| 2394 | Cc1cccn1C                            | C04689168 | -14.62 | -1.86 | -12.51 | 3.16 | -3.42 |
| 2395 | C1=C(C(=O)NC1=O)Br                   | C13379821 | -14.62 | -1.5  | -17.43 | 4.13 | 0.18  |
| 2396 | c1cc(sc1)C#N                         | C00388338 | -14.61 | -1.66 | -13.7  | 3.74 | -2.99 |
| 2397 | c1cncnc1                             | C00895216 | -14.61 | -1.62 | -14.89 | 3.82 | -1.92 |
| 2398 | C=CC(=O)OC=C                         | C01680391 | -14.61 | -1.16 | -14.71 | 3.98 | -2.73 |
| 2399 | c1cc(nnc1)C(=O)N                     | C01700271 | -14.61 | -3.4  | -19.23 | 6.43 | 1.58  |
| 2400 | CSc1nncn1N                           | C01942635 | -14.61 | -4.27 | -13.93 | 5.9  | -2.31 |
| 2401 | Cc1ccc(cc1)NC                        | C02034345 | -14.61 | -0.02 | -16.82 | 2.11 | 0.12  |
| 2402 | c1cc(c(cc1N=C=S)F)F                  | C02555887 | -14.61 | 0.6   | -14.12 | 2.91 | -4    |
| 2403 | c1c(mns1)C=O                         | C02577969 | -14.61 | -2.77 | -15.9  | 4.53 | -0.48 |
| 2404 | c1c(nc(o1)N)C(F)F                    | C04198753 | -14.61 | -3.64 | -17.16 | 4.97 | 1.21  |
| 2405 | c1ccc(c(c1)N=O)N=O                   | C05733483 | -14.61 | -2.39 | -19.37 | 8.3  | -1.14 |
| 2406 | COc1cc(cnc1)O                        | C06643313 | -14.61 | -2.26 | -17.25 | 4.27 | 0.62  |
| 2407 | c1cc(cnc1)NC(=O)NN                   | C13281615 | -14.61 | -4.14 | -18.41 | 7.17 | 0.78  |
| 2408 | CCc1ccc(cn1)O                        | C15781951 | -14.61 | -1.65 | -15.81 | 3.82 | -0.98 |
| 2409 | c1c(csc1CCl)Br                       | C20475277 | -14.61 | -0.65 | -11.91 | 2.09 | -4.14 |
| 2410 | c1cc(sc1)CNC(=S)NN                   | C00039523 | -14.6  | -0.1  | -20.41 | 8.04 | -2.12 |
| 2411 | [C@H](c1ccncc1)O                     | C00391918 | -14.6  | -1.85 | -15.95 | 3.92 | -0.72 |
| 2412 | c1cc([nH]c1)C#N                      | C01868299 | -14.6  | -3.1  | -13.86 | 4.46 | -2.1  |
| 2413 | c1cc(oc1)C(=O)CC#N                   | C02619065 | -14.6  | -2.45 | -15.53 | 6.72 | -3.34 |
| 2414 | Cc1cc([nH]1)C(F)F                    | C04243651 | -14.6  | -3.14 | -14.69 | 5.16 | -1.93 |
| 2415 | C(=O)(C(F)F)C(F)F                    | C04262093 | -14.6  | 0.32  | -13.79 | 0.88 | -2.01 |
| 2416 | c1ccc(cc1)N/C=C/O                    | C16978948 | -14.6  | -1.92 | -17    | 7.78 | -3.46 |
| 2417 | Cc1nc2c(s1)ccs2                      | C22002134 | -14.6  | -1.11 | -15.99 | 5.55 | -3.05 |
| 2418 | c1cc(nc1[N+](=O)[O-])F               | C31176462 | -14.6  | -3.52 | -14.81 | 6.24 | -2.52 |
| 2419 | CCOC(=O)C(F)F                        | C01755719 | -14.59 | -0.76 | -13.02 | 1.87 | -2.68 |
| 2420 | c1cc(c(c(c1NN)F)F)F                  | C02243115 | -14.59 | -0.87 | -16.51 | 4.52 | -1.72 |
| 2421 | c1ccc2c(c1)c(no2)[O-]                | C03588816 | -14.59 | -2.46 | -18.45 | 6.12 | 0.21  |
| 2422 | c1cn(nc1N)C(F)F                      | C12397775 | -14.59 | -3.11 | -14.93 | 4.25 | -0.79 |
| 2423 | C#Cc1c(cc(cn1)Cl)N                   | C32914748 | -14.59 | -3.76 | -15.18 | 6.11 | -1.76 |
| 2424 | c1cc(oc1C(=O)Cl)[N+](=O)[O-]         | C01621102 | -14.58 | -1.52 | -14.92 | 4.57 | -2.71 |
| 2425 | c1c(cc(c(c1F)N)F)C#N                 | C01719547 | -14.58 | 0.22  | -16.11 | 3.43 | -2.12 |
| 2426 | CCC1=CCC(=O)O1                       | C01721525 | -14.58 | -0.88 | -15.47 | 5.26 | -3.49 |

|      |                                        |           |        |       |        |       |       |
|------|----------------------------------------|-----------|--------|-------|--------|-------|-------|
| 2427 | CSSSCC=C                               | C01850544 | -14.58 | -0.29 | -13.72 | 1.8   | -2.37 |
| 2428 | CSCC=C                                 | C02015871 | -14.58 | -0.23 | -12.86 | 1.48  | -2.97 |
| 2429 | c1cc(nc(c1F)F)F                        | C02585565 | -14.58 | -1.79 | -15.5  | 4.76  | -2.05 |
| 2430 | c1ccc(cc1)O                            | C05133329 | -14.58 | -3.01 | -14.55 | 4.19  | -1.21 |
| 2431 | c1cc(=O)[nH]c(c1)Br                    | C08698198 | -14.58 | -1.23 | -18.04 | 6.13  | -1.45 |
| 2432 | c1c(ncnc1O)N                           | C14982076 | -14.58 | -4.28 | -16.42 | 4.41  | 1.71  |
| 2433 | c1cn(cn1)C(=O)N                        | C15880087 | -14.58 | -4.55 | -17.01 | 7.55  | -0.56 |
| 2434 | c1cn(cn1)CCBr                          | C19414770 | -14.58 | -0.71 | -14.3  | 4.48  | -4.05 |
| 2435 | c1c(cnc(c1N)N)N                        | C21985591 | -14.58 | -5.52 | -18.06 | 7.02  | 1.98  |
| 2436 | c1csc2n1cc(n2)CBr                      | C00078823 | -14.57 | -2.19 | -15.05 | 6.94  | -4.27 |
| 2437 | c1cc2c(cc1C#N)nns2                     | C00171442 | -14.57 | -2.16 | -16.17 | 6.49  | -2.73 |
| 2438 | CCOC(=O)[C@H](C)F                      | C02379402 | -14.57 | -0.58 | -14.83 | 3.86  | -3.02 |
| 2439 | c1(c(c(nc(c1F)F)F)F)O                  | C10157846 | -14.57 | -1.62 | -15.68 | 2.74  | -0.01 |
| 2440 | c1cn2cncc2c(=O)[nH]1                   | C17025297 | -14.57 | -4.03 | -18.73 | 10.33 | -2.14 |
| 2441 | CC(=O)c1cccc1                          | C00157401 | -14.56 | -1.8  | -15.39 | 4.95  | -2.32 |
| 2442 | Cc1c(non1)C(=O)CBr                     | C01295929 | -14.56 | 2.98  | -17.72 | 2.54  | -2.36 |
| 2443 | c1ccnc(c1)F                            | C01680673 | -14.56 | -1.61 | -15.38 | 4.43  | -2    |
| 2444 | c1cc(c(cc1N)F)O                        | C02567358 | -14.56 | -2.94 | -16.42 | 4.34  | 0.46  |
| 2445 | Cc1nccn1                               | C02582016 | -14.56 | -0.51 | -16.08 | 4.08  | -2.06 |
| 2446 | C=CCSc1[nH]ncn1                        | C05517733 | -14.56 | -2.11 | -16.97 | 3.65  | 0.87  |
| 2447 | c1cc(cc1)N)C=O                         | C19702477 | -14.56 | -4.86 | -15.78 | 6.98  | -0.9  |
| 2448 | c1cc(nc(c1[+])=O)[O-]N)Br              | C21985743 | -14.56 | -3.04 | -13.17 | 3.81  | -2.16 |
| 2449 | Cc1c[nH]nc1C                           | C00967493 | -14.55 | -2.49 | -14.67 | 4.22  | -1.6  |
| 2450 | Cc1ccc(o1)C                            | C01693339 | -14.55 | -0.94 | -13.44 | 2.89  | -3.06 |
| 2451 | Cc1c(non1)C(=O)NN                      | C01761224 | -14.55 | -2.72 | -16.86 | 4.02  | 1.01  |
| 2452 | c1cc(sc1)C=C/C#N                       | C02164362 | -14.55 | -1.47 | -15.26 | 3.94  | -1.76 |
| 2453 | Cc1[nH]cc(n1)Br                        | C02529806 | -14.55 | -1.73 | -14.78 | 3.98  | -2.02 |
| 2454 | c1cc(=O)[nH]cc1I                       | C02559902 | -14.55 | -2    | -16.43 | 5.8   | -1.92 |
| 2455 | Cc1c(cccn1)Cl                          | C02598976 | -14.55 | -1.85 | -12.46 | 2.66  | -2.9  |
| 2456 | c1cc(c(nc1)F)F                         | C02598987 | -14.55 | -1.62 | -16.08 | 5.19  | -2.05 |
| 2457 | CSc1[n-]nc(n1)C(F)F                    | C06425444 | -14.55 | -3.02 | -12.72 | 3.62  | -2.44 |
| 2458 | c1ccc(cc1)OC(=S)N                      | C06575458 | -14.55 | -0.71 | -18.44 | 3.19  | 1.41  |
| 2459 | c1cc(ncc1N)I                           | C12359488 | -14.55 | -1.63 | -15.44 | 3.76  | -1.24 |
| 2460 | c1cnoc1C=O                             | C15020993 | -14.55 | -1.59 | -16.13 | 4.48  | -1.31 |
| 2461 | C(#N)C(=N/O)/c1c(non1)N                | C15221727 | -14.55 | -1.9  | -19.08 | 5.01  | 1.43  |
| 2462 | c1cc(c(c1c1N)F)FBr                     | C15444572 | -14.55 | -1.08 | -15.28 | 4.1   | -2.29 |
| 2463 | c1nc(sn1)N                             | C16977388 | -14.55 | -4.15 | -14.31 | 4.55  | -0.63 |
| 2464 | Cc1cc(ccc1F)O                          | C00389596 | -14.54 | -0.54 | -15.16 | 2.9   | -1.75 |
| 2465 | c1ccc(cc1)OC[C@H]2CO2                  | C01462351 | -14.54 | -2.76 | -14.31 | 4.88  | -2.34 |
| 2466 | c1ccc(cc1)Cc2ccc[nH]2                  | C01574588 | -14.54 | 0.29  | -17.52 | 3.43  | -0.74 |
| 2467 | COc(=O)Sc1ccc(cc1)F                    | C01604544 | -14.54 | -0.58 | -16.08 | 4.07  | -1.95 |
| 2468 | c1ccc(cc1)[C@H](CBr)O                  | C04071989 | -14.54 | -1.32 | -13.45 | 2.92  | -2.69 |
| 2469 | c1nc2n(n1)[C@H](N=N2)[N+](=O)[O-]      | C04593310 | -14.54 | -2.66 | -14.49 | 5.21  | -2.61 |
| 2470 | C(CCl)N(C(=O)N)N=O                     | C04705960 | -14.54 | -3.53 | -15.14 | 3.48  | 0.64  |
| 2471 | C=COCC=C                               | C05157937 | -14.54 | -0.02 | -14.93 | 3     | -2.59 |
| 2472 | c1[nH]nc(n1)Br                         | C06119231 | -14.54 | -5.31 | -15.03 | 7.85  | -2.05 |
| 2473 | Cc1nc(sn1)N                            | C08652409 | -14.54 | -5.26 | -14.54 | 5.97  | -0.71 |
| 2474 | Cc1ccc(cn1)NN                          | C21298527 | -14.54 | -1.99 | -17.36 | 5.5   | -0.69 |
| 2475 | c1c[nH]c2c1nnc2                        | C21298867 | -14.54 | -4.84 | -16.7  | 8.87  | -1.87 |
| 2476 | c1c(cc(cc1F)F)C(=O)N=C=S               | C21963792 | -14.54 | 2.56  | -17.25 | 3.37  | -3.21 |
| 2477 | c1cc(c(nc1)Cl)O                        | C00164485 | -14.53 | -1.58 | -17.67 | 5.03  | -0.31 |
| 2478 | CC(=C)C(=O)OCC=C                       | C01561515 | -14.53 | -0.62 | -15.06 | 3.69  | -2.54 |
| 2479 | CCNC(=O)OCC=C                          | C01682119 | -14.53 | -1.77 | -15.85 | 4.25  | -1.15 |
| 2480 | CC(=O)OCC=C                            | C01683665 | -14.53 | -0.32 | -15.4  | 3.94  | -2.76 |
| 2481 | c1cc(c(cc1CBr)F)N                      | C02243165 | -14.53 | -1.8  | -16.26 | 3.01  | 0.52  |
| 2482 | c1cc(nnc1N)N                           | C02551261 | -14.53 | -3.97 | -17.81 | 6.64  | 0.61  |
| 2483 | Cn1nc(n1)[N+](=O)[O-]                  | C02755199 | -14.53 | -4.32 | -15.32 | 10.02 | -4.91 |
| 2484 | c1c2nncn2cnc1Cl                        | C12505138 | -14.53 | 0.17  | -18.86 | 8.79  | -4.63 |
| 2485 | c1cnn(c1N)CCC#N                        | C26545198 | -14.53 | -3.05 | -17.43 | 7.88  | -1.93 |
| 2486 | CCOC(=O)Cl                             | C02034866 | -14.52 | -0.68 | -13.72 | 2     | -2.12 |
| 2487 | c1c(ccn1)CCO                           | C02559654 | -14.52 | -2.69 | -16.42 | 4.46  | 0.13  |
| 2488 | COc(=O)C1ccc(cc1)F                     | C02570118 | -14.52 | -1.06 | -16.56 | 5.69  | -2.6  |
| 2489 | Cc1cncc(n1)Cl                          | C04287800 | -14.52 | -0.7  | -15.87 | 3.58  | -1.53 |
| 2490 | Cc1cc(c(s1)C#N)N                       | C15442537 | -14.52 | -1.98 | -15.37 | 4.79  | -1.96 |
| 2491 | C=CC[C@H](CC)O                         | C31829554 | -14.52 | -1.54 | -13.91 | 2.32  | -1.4  |
| 2492 | COc(=O)c1cc[nH]n1                      | C32445539 | -14.52 | -1.78 | -16.7  | 5.34  | -1.39 |
| 2493 | c1cnccc1C=O                            | C00157163 | -14.51 | -2.07 | -16.43 | 5.76  | -1.77 |
| 2494 | CC/C=C/CCO                             | C01531144 | -14.51 | -1.96 | -13.3  | 1.91  | -1.16 |
| 2495 | c1c(sc(n1)[O-])[N+](=O)[O-]            | C01603230 | -14.51 | -3.22 | -18.96 | 7.27  | 0.39  |
| 2496 | C[C@H](CO[N+](=O)[O-])[O-][N+](=O)[O-] | C04743757 | -14.51 | -0.15 | -13.95 | 3.92  | -4.34 |
| 2497 | c1nc([n-]n1)NC2=CC(=O)CCC2             | C06062900 | -14.51 | 0.79  | -18.1  | 7.88  | -5.08 |
| 2498 | CNC(=O)n1cnc(n1)N                      | C16981303 | -14.51 | -5.72 | -13.93 | 6.76  | -1.63 |
| 2499 | c1cc(nc(c1)Br)N                        | C19735573 | -14.51 | -2.01 | -15.55 | 4.63  | -1.59 |
| 2500 | CCOC(=O)CCl                            | C20231543 | -14.51 | -0.24 | -13.15 | 2.77  | -3.89 |
| 2501 | Cc1cc(no1)C(=O)C                       | C32501215 | -14.51 | -0.62 | -15.79 | 4.41  | -2.52 |
| 2502 | c1csc1CO                               | C00158760 | -14.5  | -1.21 | -16.17 | 3.33  | -0.45 |
| 2503 | c1csc(c1C#N)N                          | C00159971 | -14.5  | -2.96 | -15.32 | 5     | -1.23 |
| 2504 | Cc1nccs1                               | C02510297 | -14.5  | -1.73 | -14.16 | 3.22  | -1.84 |
| 2505 | c1cnc(n1)CCO                           | C02566780 | -14.5  | -5.46 | -16.28 | 5.98  | 1.25  |
| 2506 | C=CC(=O)OCCF                           | C02584299 | -14.5  | -0.61 | -16.14 | 5.1   | -2.86 |
| 2507 | C=CCNC(=S)N                            | C03875768 | -14.5  | -2.72 | -14.48 | 3.05  | -0.35 |
| 2508 | [H]/N=C/(c1c(non1)N)OC                 | C05248327 | -14.5  | 0.42  | -19.77 | 3.54  | 1.31  |
| 2509 | Cc1cccnc1C                             | C08294963 | -14.5  | -0.38 | -14.41 | 3.27  | -2.99 |
| 2510 | c1([nH]c(=O)n1)N)N                     | C17105082 | -14.5  | -4.61 | -16.34 | 5.93  | 0.52  |
| 2511 | c1cc(cc(c1)Nc2nccs2)N                  | C19432130 | -14.5  | 0.47  | -18.08 | 5.53  | -2.42 |
| 2512 | c1csc(c1C=O)C=O                        | C00160395 | -14.49 | -2.27 | -16.71 | 6.7   | -2.2  |
| 2513 | c1c(c(c(c1F)F)[O-])F                   | C00406984 | -14.49 | -1.55 | -14.41 | 3.09  | -1.62 |
| 2514 | COc(=O)c1ccno1                         | C02381208 | -14.49 | -0.64 | -15.92 | 4.18  | -2.1  |
| 2515 | c1c(c(cc(c1F)N)F)C#N                   | C02556403 | -14.49 | 1.22  | -18.41 | 4.81  | -2.1  |
| 2516 | C/C=C/C(=O)N=C=S                       | C04253936 | -14.49 | -0.49 | -16.28 | 4.13  | -1.85 |

|      |                                               |           |        |       |        |       |       |
|------|-----------------------------------------------|-----------|--------|-------|--------|-------|-------|
| 2517 | C/C=C(C(=O)OC=C                               | C13380325 | -14.49 | 1.16  | -15.88 | 3.56  | -3.33 |
| 2518 | C(c1[nH]c(nn1)[S-])S                          | C16754627 | -14.49 | -2.67 | -16.15 | 5.99  | -1.66 |
| 2519 | c1ccc(cc1)OC(=O)N=C=S                         | C22006795 | -14.49 | 0.34  | -18.81 | 6.5   | -2.51 |
| 2520 | Oc1c(cccc1)CCC                                | W2004A003 | -14.49 | -0.86 | -13.14 | 2.54  | -3.03 |
| 2521 | c1cc(ccc1C=O)C#N                              | C00156750 | -14.48 | -0.89 | -17.28 | 7.05  | -3.35 |
| 2522 | c1cc(ccc1C=O)Cl                               | C00896325 | -14.48 | -0.27 | -15.42 | 4.69  | -3.49 |
| 2523 | Cc1ccc(s1)O                                   | C01701785 | -14.48 | -4.32 | -14.34 | 3.14  | 1.04  |
| 2524 | C(CN=C=S)C(=O)Cl                              | C01755319 | -14.48 | 0.7   | -18.55 | 2.38  | 0.99  |
| 2525 | c1cc(cnc1)C(=O)NO                             | C02558618 | -14.48 | -6.05 | -18.41 | 8.14  | 1.85  |
| 2526 | CCCCSC(=NH2+)N                                | C04582268 | -14.48 | -2.43 | -12.67 | 2.37  | -1.75 |
| 2527 | c1c2c([nH]n1)nc([nH]c2=O                      | C13298313 | -14.48 | -3.55 | -19.95 | 9.68  | -0.67 |
| 2528 | c1c(cnc1)O                                    | C14400981 | -14.48 | -1.03 | -15.49 | 2.82  | -0.78 |
| 2529 | Cc1c(n[nH]n1)C(=O)C                           | C16265729 | -14.48 | -3.09 | -15.11 | 4.22  | -0.51 |
| 2530 | c1cnc(c1C(F)F)F                               | C00077224 | -14.47 | 0.68  | -16.62 | 2.88  | -1.41 |
| 2531 | CC(=C)C[N+](=O)[O-]                           | C01575619 | -14.47 | -1.17 | -15.32 | 3.38  | -1.36 |
| 2532 | CC(=C)CC#N                                    | C01669345 | -14.47 | -0.3  | -14.57 | 2.81  | -2.4  |
| 2533 | Cc1cc(cnc1F)C#N                               | C02384025 | -14.47 | -0.42 | -15.58 | 4.33  | -2.8  |
| 2534 | c1csc(n1)CC#N                                 | C04228173 | -14.47 | -2.65 | -16.58 | 6.99  | -2.23 |
| 2535 | c1cc(sc1)C=N/O                                | C04582794 | -14.47 | -3.66 | -15.51 | 5.53  | -0.83 |
| 2536 | c1cc2c(cc1O)n[nH]n2                           | C06567234 | -14.47 | -5.52 | -18.23 | 8.18  | 1.09  |
| 2537 | c1cc(sc1C=N)OBr                               | C12359046 | -14.47 | -1.82 | -18.3  | 4.43  | 1.22  |
| 2538 | Cc1cc(on1)C(F)F                               | C12398509 | -14.47 | 0.81  | -15.29 | 2.85  | -2.84 |
| 2539 | c1ccc(c(c1)N)N=[N+]=[N-]                      | C20495219 | -14.47 | -1.89 | -15.61 | 3.29  | -0.26 |
| 2540 | c1cc(c(cc1O)Cl)F                              | C00164535 | -14.46 | -3.67 | -12.47 | 3.29  | -1.61 |
| 2541 | Cc1ccnnc1                                     | C01603717 | -14.46 | -2.13 | -16.06 | 5.38  | -1.65 |
| 2542 | c1ccc(cc1)OCC#N                               | C01681319 | -14.46 | -0.4  | -16.59 | 6     | -3.47 |
| 2543 | C(=O)C(=C(Cl)Cl)Cl                            | C02038399 | -14.46 | -1.37 | -13.24 | 2.59  | -2.44 |
| 2544 | c1c(cncn1)CO                                  | C02511464 | -14.46 | -3.73 | -17.7  | 5.09  | 1.88  |
| 2545 | c1cc(sc1)CNC(=S)N                             | C13535068 | -14.46 | -1.89 | -18.9  | 8.54  | -2.21 |
| 2546 | c1cnc2c(n1)[nH]cn2                            | C15895404 | -14.46 | -4.08 | -18.78 | 10.43 | -2.03 |
| 2547 | Cn1cncnc1=O                                   | C00330833 | -14.45 | -3.11 | -17.45 | 8.29  | -2.18 |
| 2548 | c1cc(ccc1C#N)NN                               | C00396173 | -14.45 | -0.54 | -17.12 | 5.02  | -1.8  |
| 2549 | Cc1ccc(cc1)OC(=O)C                            | C00409286 | -14.45 | -0.17 | -15.12 | 5.68  | -4.84 |
| 2550 | C1=CC(=CO)C=C1                                | C05133089 | -14.45 | -1.04 | -13.98 | 3.21  | -2.65 |
| 2551 | c1cc2c(cc1)noc2nc1[O-]                        | C05636149 | -14.45 | -5.84 | -17.05 | 7.17  | 1.27  |
| 2552 | c1cc(c(c1)F)O                                 | C16159287 | -14.45 | -3.12 | -15.73 | 4.13  | 0.27  |
| 2553 | c1cc(sc1)CO                                   | C00157467 | -14.44 | -1.29 | -16.09 | 3.59  | -0.65 |
| 2554 | Cc1c(snn1)Cl                                  | C01391101 | -14.44 | -0.34 | -15.28 | 2.7   | -1.53 |
| 2555 | Cc1cc(cnc1)C=C                                | C01435983 | -14.44 | 0.27  | -14.32 | 3.02  | -3.4  |
| 2556 | CC(C)CCO[N+](=O)[O-]                          | C02034832 | -14.44 | 0.47  | -14.29 | 1.45  | -2.06 |
| 2557 | C=CCOCc1ccccc1                                | C02555302 | -14.44 | 1.2   | -13.78 | 2.58  | -4.44 |
| 2558 | c1(nnc(n1N)[S-])C(F)Cl                        | C04294112 | -14.44 | -5.49 | -10.58 | 3.69  | -2.07 |
| 2559 | C#CCSC(=NH2+)N                                | C04627434 | -14.44 | -0.88 | -15.51 | 2.94  | -0.99 |
| 2560 | C(=C(N=O)Cl)(NO)Cl                            | C05178359 | -14.44 | -7.96 | -14.37 | 6.95  | 0.94  |
| 2561 | c1c(ncn1)Cl)C#N                               | C05784094 | -14.44 | -1.44 | -16.77 | 4.27  | -0.5  |
| 2562 | C=Cc1c(ccc1)C=O                               | C06665692 | -14.44 | 0.32  | -17.15 | 5.25  | -2.87 |
| 2563 | c1cc2c(c[nH]c2nc1)Cl                          | C08729948 | -14.44 | -4.22 | -11.84 | 4.81  | -3.18 |
| 2564 | CN/C(=NC#N)[S-]                               | C12243856 | -14.44 | -5.75 | -13.05 | 7.58  | -3.22 |
| 2565 | c1cc(nnc1C(F)F)Cl                             | C19616299 | -14.44 | -2.72 | -14.12 | 4.86  | -2.46 |
| 2566 | CCc1cc(n[nH]1)C(F)F                           | C26547615 | -14.44 | -3.78 | -12.58 | 4.93  | -3.01 |
| 2567 | c1cc(ccc1CNC(=S)NN)F                          | C00103927 | -14.43 | 0.12  | -20.27 | 8.51  | -2.79 |
| 2568 | c1cc(ccc1SC#N)Br                              | C01597251 | -14.43 | -1.87 | -14.81 | 3.29  | -1.04 |
| 2569 | c1cnc(nc1)Cl                                  | C01676249 | -14.43 | -2.49 | -15.16 | 5.08  | -1.86 |
| 2570 | c1ccc(c(c1)[N+](=O)[O-])F                     | C01682934 | -14.43 | -3.19 | -15.21 | 7.81  | -3.84 |
| 2571 | c1c(cncn1)F                                   | C01845840 | -14.43 | -0.73 | -15.68 | 2.56  | -0.59 |
| 2572 | c1csc2c1C(=O)CC2                              | C02345435 | -14.43 | -0.64 | -16.61 | 6.19  | -3.37 |
| 2573 | c1cnc(c1Cl)Cl                                 | C02386413 | -14.43 | -2.27 | -14.34 | 2.26  | -0.07 |
| 2574 | c1cnc([nH]1)I                                 | C02531019 | -14.43 | -1.52 | -15.56 | 4.44  | -1.79 |
| 2575 | c1c(c[nH]c(=O)c1F)Br                          | C08698166 | -14.43 | -2.27 | -18.58 | 7.94  | -1.53 |
| 2576 | c1(c(n[nH]n1)Cl)C(=O)N=[N+]=[N-]              | C13764156 | -14.43 | 0.08  | -21.72 | 4.39  | 2.82  |
| 2577 | c1c(n[nH]c1N)C(F)F                            | C18217802 | -14.43 | -5.01 | -15.56 | 6.7   | -0.56 |
| 2578 | c1csc2n1cc(n2)CCl                             | C20272873 | -14.43 | -2.28 | -15.24 | 7.31  | -4.22 |
| 2579 | c1c(csc1Br)C=O                                | C20282211 | -14.43 | -0.28 | -14.65 | 3.42  | -2.92 |
| 2580 | C/C(=NH+)C#N)/NC                              | C21984054 | -14.43 | -1.81 | -13.64 | 3.8   | -2.78 |
| 2581 | c1c(c(n[nH]1)C=O)Cl                           | C01494998 | -14.42 | -1    | -16.14 | 3.65  | -0.92 |
| 2582 | c1c(cnc(n1)NN)Br                              | C01495002 | -14.42 | -2.69 | -13.56 | 3.52  | -1.7  |
| 2583 | CC(=O)NCCc1cncn1                              | C01601708 | -14.42 | -0.91 | -22.76 | 7.49  | 1.76  |
| 2584 | Cn1cnc1Cl                                     | C01845610 | -14.42 | -2.11 | -13.33 | 4.11  | -3.08 |
| 2585 | c1cc(c(c1F)O)F)Cl                             | C02381671 | -14.42 | -1.78 | -16.06 | 3.8   | -0.38 |
| 2586 | C(=O)(C(=O)F)C(F)F                            | C02525507 | -14.42 | -0.11 | -14.79 | 1.66  | -1.19 |
| 2587 | c1cnc([nH]1)Br                                | C02577854 | -14.42 | -2.65 | -14.61 | 4.55  | -1.71 |
| 2588 | c1cc(ccc1N=O)Br                               | C03850578 | -14.42 | -1.48 | -15.35 | 2.2   | 0.22  |
| 2589 | c1ccc(cc1)NC(=S)C(=O)N                        | C04358287 | -14.42 | -4.51 | -14.46 | 5.47  | -0.92 |
| 2590 | c1c(c(cc1F)Cl)F)C#N                           | C19615480 | -14.42 | -0.52 | -13.02 | 3.18  | -4.06 |
| 2591 | c1cnc1C=O                                     | C20417648 | -14.42 | -1.71 | -16.56 | 5.03  | -1.17 |
| 2592 | c1cc2nncn2cc1Cl                               | C22995851 | -14.42 | -2.33 | -14.7  | 7.2   | -4.59 |
| 2593 | c1ccc(cc1)Cn2c(nnn2)N                         | C00247141 | -14.41 | 0.06  | -19.36 | 8.57  | -3.68 |
| 2594 | c1ccc(c(c1)NC=O)O                             | C00393914 | -14.41 | -2.32 | -19.12 | 6.99  | 0.05  |
| 2595 | c1cc(ccc1F)NC=O                               | C01685769 | -14.41 | -2.83 | -15.96 | 6.44  | -2.07 |
| 2596 | CCOC(=O)Cl                                    | C01689384 | -14.41 | -1.17 | -13.29 | 3.32  | -3.26 |
| 2597 | c1cc(ccc1C(F)F)O                              | C01847459 | -14.41 | -1.23 | -15.16 | 2.98  | -1    |
| 2598 | C(OC(=O)OCC)Cl                                | C02511045 | -14.41 | -2.05 | -14.49 | 4.68  | -2.55 |
| 2599 | c1(c(non1)Oc2c(non2)[N+](=O)[O-])[N+](=O)[O-] | C04343708 | -14.41 | -0.44 | -13.29 | 0.73  | -1.4  |
| 2600 | CC=C=CCO                                      | C04658605 | -14.41 | -1.51 | -13.44 | 1.79  | -1.25 |
| 2601 | CC(=O)CC(=O)C                                 | C04720638 | -14.41 | -2.71 | -13.84 | 3.94  | -1.8  |
| 2602 | c1cnc(nc1)NN                                  | C17748851 | -14.41 | -1.48 | -17.15 | 5.7   | -1.48 |
| 2603 | c1csc(n1)NCC(=O)N                             | C20559709 | -14.41 | -5.13 | -17.51 | 7.28  | 0.96  |
| 2604 | c1cc([nH+])c(c1[O-])F)Br                      | C21982774 | -14.41 | -1.37 | -17.32 | 4.57  | -0.3  |
| 2605 | Cc1ccc(cc1)NC=O                               | C00337958 | -14.4  | -1.93 | -17.16 | 7.17  | -2.48 |
| 2606 | c1cc(c(cc1F)Br)O                              | C00409324 | -14.4  | -0.34 | -17.38 | 2.77  | 0.55  |

|      |                                 |           |        |       |        |       |       |
|------|---------------------------------|-----------|--------|-------|--------|-------|-------|
| 2607 | CCOCc1ccco1                     | C01668234 | -14.4  | -0.61 | -14.97 | 3.75  | -2.56 |
| 2608 | CC(=O)OCC(=O)Cl                 | C02019437 | -14.4  | 0.55  | -16.99 | 4.78  | -2.74 |
| 2609 | c1cc(oc1C(=O)Cl)Br              | C02574178 | -14.4  | -1.66 | -16.14 | 4.11  | -0.71 |
| 2610 | c1cnc2nc(cn2c1)N                | C03218662 | -14.4  | -3.27 | -18.29 | 10.46 | -3.3  |
| 2611 | c1cc2c(c[nH]2)c(c1)O            | C04204272 | -14.4  | -2.54 | -16.92 | 5.22  | -0.16 |
| 2612 | C/C=C/SSC                       | C05371734 | -14.4  | -0.97 | -13.76 | 1.62  | -1.3  |
| 2613 | Cn1cnc(n1)N                     | C13451776 | -14.4  | -3.55 | -15.47 | 7.07  | -2.45 |
| 2614 | c1cnc(c(=O)c1)N[N+](=O)[O-]     | C15767170 | -14.4  | -0.3  | -22.15 | 10.59 | -2.55 |
| 2615 | CCc1cc(=O)[nH]nc1               | C17108646 | -14.4  | -2.93 | -17.12 | 6.77  | -1.12 |
| 2616 | CCN/C=C/1C=CC=[NH+]             | C17378191 | -14.4  | 1.1   | -16.77 | 3.19  | -1.92 |
| 2617 | c1c(cnc(c1)[N+](=O)[O-])N)C#N   | C21981864 | -14.4  | -1.95 | -16.47 | 5.87  | -1.85 |
| 2618 | COC(=O)OCC(=O)Cl                | C22002285 | -14.4  | -2.61 | -14.49 | 5.21  | -2.51 |
| 2619 | c1cnc(cn1)C(=O)N                | C00002005 | -14.39 | -4.94 | -17.44 | 6.42  | 1.59  |
| 2620 | c1cc(sc1)C(=O)N                 | C00153111 | -14.39 | -3.21 | -16.93 | 5.94  | -0.19 |
| 2621 | c1cc(occ1C#N)C#N                | C00391934 | -14.39 | -1.84 | -14.52 | 5.9   | -3.93 |
| 2622 | CCC(=O)COC(=O)C                 | C00393908 | -14.39 | 0.76  | -18.14 | 6.5   | -3.5  |
| 2623 | Cc1cnoc1                        | C02529291 | -14.39 | -1.5  | -14.55 | 3.58  | -1.91 |
| 2624 | C(C(F)(F)F)OC([C@@H](F)Cl)(F)F  | C02560093 | -14.39 | -1.31 | -13.13 | 2.91  | -2.86 |
| 2625 | c1c(c(cs1)C(=O)N)N              | C04344037 | -14.39 | -5.45 | -15.73 | 4.45  | 2.34  |
| 2626 | c1(c(nH)n1)N)C(=S)N             | C04878413 | -14.39 | -3.54 | -18.95 | 6.6   | 1.51  |
| 2627 | CCOC(=O)C(=N)N)C                | C05046670 | -14.39 | -2.98 | -13.68 | 3.76  | -1.5  |
| 2628 | c1cc(nc1Sc2[nH]ncn2)N           | C19869342 | -14.39 | -3.49 | -16.13 | 7.27  | -2.04 |
| 2629 | c1c(c(cs1)C=O)C=O               | C22003342 | -14.39 | -2.7  | -17.65 | 8.02  | -2.07 |
| 2630 | CS1cc(nnc1)N                    | C30678126 | -14.39 | -1.9  | -17.8  | 6.42  | -1.11 |
| 2631 | C=COCCOC=C                      | C01603457 | -14.38 | -0.34 | -16.26 | 4.11  | -1.9  |
| 2632 | c1[nH]c2c(n1)CCCC2              | C01734290 | -14.38 | -2.75 | -13.64 | 5.31  | -3.3  |
| 2633 | CC(=O)C(=O)C(=O)C               | C01754507 | -14.38 | 0.62  | -17.62 | 4.52  | -1.9  |
| 2634 | CCSC(=O)Cl                      | C02033138 | -14.38 | -1.02 | -13.04 | 2.01  | -2.33 |
| 2635 | c1cc2c(cc1F)OC(O2)(F)F          | C02560205 | -14.38 | 0.27  | -15.71 | 2.78  | -1.73 |
| 2636 | c1cc(occ1OCC#N)F                | C02580715 | -14.38 | -0.6  | -17.16 | 6.88  | -3.51 |
| 2637 | Cc1c[nH]c(n1)Cl                 | C04771953 | -14.38 | -2.96 | -14.07 | 4.64  | -1.99 |
| 2638 | [H]/N=c1/n(nnn1C=C)C            | C04984238 | -14.38 | -3.87 | -12.08 | 3.73  | -2.15 |
| 2639 | Cc1c([nH+][nH]c1)N)C            | C16769947 | -14.38 | -3.64 | -14.53 | 4.55  | -0.75 |
| 2640 | CCc1ccc(cn1)Br                  | C21304087 | -14.38 | -2.01 | -11.02 | 2.37  | -3.72 |
| 2641 | Cc1ccccc1C                      | M1995A034 | -14.38 | -0.93 | -10.78 | 1.62  | -4.29 |
| 2642 | c1cc(ccc1N)OC(F)(F)F            | C00081472 | -14.37 | -0.13 | -15.22 | 2.53  | -1.54 |
| 2643 | CC(=O)NC/C(=C)Cl/Cl             | C01674053 | -14.37 | -0.52 | -19.66 | 5.18  | 0.63  |
| 2644 | c1ccc(cc1)C(=O)C(F)(F)F         | C01675545 | -14.37 | 1.68  | -15.05 | 3.01  | -4.01 |
| 2645 | CCOC(=O)CN=C=S                  | C02014870 | -14.37 | -1.36 | -15.88 | 5.1   | -2.23 |
| 2646 | [C@]1(C(O1)(F)F)(C(F)(F)F)Br    | C16082669 | -14.37 | -0.11 | -13.19 | 0.36  | -1.43 |
| 2647 | CO/C=C/C=C                      | C16893178 | -14.37 | -1.73 | -12.63 | 2.21  | -2.22 |
| 2648 | Cc1c(csn1)N                     | C26461281 | -14.37 | -2.71 | -15.71 | 4.49  | -0.44 |
| 2649 | c1cc(cnc1)CO                    | C00001799 | -14.36 | -1.38 | -17.81 | 4.72  | 0.11  |
| 2650 | c1cnc(cn1)F                     | C01585904 | -14.36 | -4.11 | -15.57 | 5.84  | -0.52 |
| 2651 | c1(nnc(s1)Br)N                  | C04468797 | -14.36 | -4.69 | -14.2  | 4.94  | -0.4  |
| 2652 | c1c(c(=O)[nH]cn1)Br             | C05425261 | -14.36 | -2.29 | -17.82 | 3.63  | 2.13  |
| 2653 | c1cnc([nH]1)CCl                 | C01494936 | -14.35 | -1.55 | -16.13 | 5.35  | -2.01 |
| 2654 | C=NNc1ccccc1                    | C01692376 | -14.35 | -2.44 | -15.53 | 4.1   | -0.48 |
| 2655 | CN(C(=O)NCCF)N=O                | C04921203 | -14.35 | -2.3  | -16.44 | 4.23  | 0.15  |
| 2656 | Cn1c(nnn1)C(F)(F)F              | C05053144 | -14.35 | -1.07 | -15.52 | 5.06  | -2.83 |
| 2657 | [C@H](C(F)(F)Br)(OC(F)(F)F)F    | C08698310 | -14.35 | 0.12  | -13.94 | 1.53  | -2.06 |
| 2658 | c1cc(c(cc1SC(F)(F)F)N)Cl        | C15442354 | -14.35 | -2.66 | -10.06 | 1.73  | -3.35 |
| 2659 | c1ccc(cc1)Cc2nnc(n2)N           | C16952811 | -14.35 | -1.47 | -12.86 | 4.44  | -4.46 |
| 2660 | CCNc1ccc(c[nH+]1)C              | C21503152 | -14.35 | -3    | -11.51 | 3.14  | -2.98 |
| 2661 | Cc1ccc(c(c1)N)O                 | C00388269 | -14.34 | -3.27 | -13.99 | 3.06  | -0.14 |
| 2662 | c1cc(nn2c1nnn2)Cl               | C01435441 | -14.34 | -4.12 | -17.95 | 8.77  | -1.04 |
| 2663 | C=CC[C@H](C=C)O                 | C01674838 | -14.34 | -0.66 | -14.23 | 1.68  | -1.14 |
| 2664 | CCOC(=O)C(=O)N                  | C01679740 | -14.34 | -3.69 | -15.55 | 4.78  | 0.12  |
| 2665 | c1cscc1I                        | C02015848 | -14.34 | -0.64 | -15.13 | 1.25  | 0.19  |
| 2666 | C(CF)OC(=O)Cl                   | C02040572 | -14.34 | -0.97 | -14.51 | 3.43  | -2.29 |
| 2667 | COc1nccs1                       | C02381581 | -14.34 | -0.92 | -16.68 | 3.35  | -0.09 |
| 2668 | COc1cc(no1)Cl                   | C03882970 | -14.34 | 0.83  | -15.98 | 2.5   | -1.69 |
| 2669 | Cc1cc[nH]n1                     | C04701702 | -14.34 | -2.82 | -14.47 | 4.15  | -1.2  |
| 2670 | Cn1ccc(c1)[N+](=O)[O-]          | C04753651 | -14.34 | -2.99 | -15.55 | 7.89  | -3.68 |
| 2671 | c1c([nH]nc1NN)N                 | C04772536 | -14.34 | -5.24 | -16.1  | 5.8   | 1.19  |
| 2672 | CC/C=C/CO                       | C05224689 | -14.34 | -2.02 | -13.72 | 2.1   | -0.71 |
| 2673 | C1C(=CC(=O)CS1)O                | C05385876 | -14.34 | -6.28 | -16.23 | 7.92  | 0.25  |
| 2674 | C#CCN1C(=O)CSC1=O               | C06295348 | -14.34 | 1.35  | -19.54 | 6.01  | -2.16 |
| 2675 | c1c(cnc(c1N)N)Br                | C18995568 | -14.34 | -0.52 | -17    | 3.42  | -0.23 |
| 2676 | c1cc(cc(c1)F)CNC                | C19171905 | -14.34 | 0.63  | -16.46 | 2.85  | -1.37 |
| 2677 | c1nc(on1)CCl                    | C20282418 | -14.34 | -1.9  | -15.51 | 4.25  | -1.17 |
| 2678 | Cc1cnc(cn1)Br                   | C20358077 | -14.34 | -0.86 | -15.25 | 3.47  | -1.69 |
| 2679 | c1ccc(c(c1)C#N)F                | C00164450 | -14.33 | 0.43  | -16.69 | 5.56  | -3.63 |
| 2680 | c1cc2nnnn2cc1O                  | C01597528 | -14.33 | -5.45 | -18.46 | 9.6   | -0.02 |
| 2681 | c1c(c(=O)[nH]c(=O)[nH]1)N=C=S   | C01598890 | -14.33 | -2.54 | -21.9  | 9.7   | 0.42  |
| 2682 | CCOC(=O)C(=O)C                  | C01679741 | -14.33 | -0.77 | -14.6  | 3.73  | -2.69 |
| 2683 | C=C(C(=O)OCC(C(F)F)(F)F)F       | C02383137 | -14.33 | -0.04 | -13.98 | 4.32  | -4.63 |
| 2684 | c1c(c[nH]1)C#N                  | C02389916 | -14.33 | -4.74 | -14.81 | 6.32  | -1.1  |
| 2685 | c1cc(ccc1NC(=O)C(=O)N)F         | C04525690 | -14.33 | -2.13 | -19.17 | 5.16  | 1.82  |
| 2686 | Cn1nc(nn1)C(F)(F)F              | C05053143 | -14.33 | -2.39 | -13.97 | 4.73  | -2.69 |
| 2687 | C/C=N/n1cncn1                   | C05282697 | -14.33 | -3.61 | -15.04 | 7.96  | -3.64 |
| 2688 | c1c(sc(n1)C=O)Br                | C15022153 | -14.33 | -1.26 | -14.8  | 3.37  | -1.64 |
| 2689 | c1c(nc(s1)CS)Br                 | C15442514 | -14.33 | -1.69 | -13.87 | 3.66  | -2.42 |
| 2690 | c1([nH]c(=S)[nH]n1)N            | C16955814 | -14.33 | -4.7  | -14.85 | 6.57  | -1.35 |
| 2691 | C1CCC(C1)CN=C=O                 | C19502816 | -14.33 | -0.92 | -13.87 | 1.82  | -1.36 |
| 2692 | c1cc([nH]c1C(=O)Cl)[N+](=O)[O-] | C20248576 | -14.33 | -2.69 | -12.06 | 3.74  | -3.32 |
| 2693 | Cc1cc(n(n1)C)N                  | C00152286 | -14.32 | -5.05 | -13.15 | 5.21  | -1.33 |
| 2694 | c1ccc(c(c1)CNC(=O)N)F           | C01383313 | -14.32 | 0.31  | -21.62 | 7.43  | -0.44 |
| 2695 | c1c(cc(c(c1F)C=O)F)O            | C03880149 | -14.32 | -0.97 | -18.61 | 5.99  | -0.73 |
| 2696 | Cc1c(c([nH]1)C(F)(F)F)N         | C04244014 | -14.32 | -3.13 | -13.73 | 3.1   | -0.56 |

|      |                              |           |        |       |        |      |       |
|------|------------------------------|-----------|--------|-------|--------|------|-------|
| 2697 | C/C=C(C(=O)Cl                | C13380326 | -14.32 | -1.87 | -12.9  | 2.88 | -2.43 |
| 2698 | c1cnc(c(c1Cl)O)N             | C21981844 | -14.32 | -4.53 | -14.22 | 4.02 | 0.41  |
| 2699 | c1cc(sc1)Br                  | C01673392 | -14.31 | -0.42 | -15.7  | 1.6  | 0.2   |
| 2700 | C/C=C(\C)/[N+](=O)[O-]       | C02037572 | -14.31 | -1.53 | -14.94 | 5.33 | -3.17 |
| 2701 | COC(=O)C(=C)C(F)F            | C02539782 | -14.31 | -1.34 | -14.33 | 4.21 | -2.84 |
| 2702 | c1cc(c(c1)Br)N               | C02574362 | -14.31 | -2.04 | -14.79 | 2.04 | 0.48  |
| 2703 | COC(=O)c1c(c[nH]n1)Cl        | C04243785 | -14.31 | 0.4   | -17.65 | 4.59 | -1.64 |
| 2704 | CCNn1cnc1                    | C05312200 | -14.31 | -1.24 | -16.53 | 6.35 | -2.89 |
| 2705 | Cc1c(c(on1)N)Cl              | C12336381 | -14.31 | -3.78 | -13.82 | 3.36 | -0.08 |
| 2706 | CC(=O)Nc1[nH]ccn1            | C13354633 | -14.31 | -4.93 | -13.65 | 6.46 | -2.19 |
| 2707 | c1cc(=O)cc1Br                | C21989743 | -14.31 | -0.89 | -16.74 | 6.47 | -3.15 |
| 2708 | c1ccc(cc1)[C@@H]2CO2         | C00901251 | -14.3  | -1.89 | -13.37 | 3.65 | -2.68 |
| 2709 | CN(C(=O)OC)[N+](=O)[O-]      | C01646520 | -14.3  | -1.98 | -14.9  | 3.94 | -1.36 |
| 2710 | C(C#N)Sc1nc(nH)n1N           | C02241721 | -14.3  | -1.91 | -17.85 | 7.8  | -2.33 |
| 2711 | c1c2c(ncn1)nc(nH)2Cl         | C04430278 | -14.3  | -4.95 | -18.24 | 7.37 | 1.52  |
| 2712 | [C@H](C(=O)Br)(C(F)F)F       | C16125632 | -14.3  | 0.14  | -14.37 | 2.33 | -2.4  |
| 2713 | Cc1cnc(n1)[N+](=O)[O-]       | C00967455 | -14.29 | -2.96 | -15.34 | 6.37 | -2.36 |
| 2714 | c1cc(nc(c1)F)NN              | C01387409 | -14.29 | -3.31 | -15.64 | 5.64 | -0.98 |
| 2715 | c1c(cncn1)C(=O)Cl            | C02511468 | -14.29 | 0.34  | -17.69 | 3.14 | -0.08 |
| 2716 | c1(c(=O)[nH]c(n1)[O-])N      | C05425207 | -14.29 | -2.74 | -19.26 | 4.88 | 2.83  |
| 2717 | c1c(cc(nc1F)F)NN             | C16159843 | -14.29 | -2.53 | -16.92 | 5.31 | -0.15 |
| 2718 | c1cnc(c(c1F)F)F              | C21987576 | -14.29 | 0.66  | -15.87 | 3.8  | -2.88 |
| 2719 | Cn1c(=O)cn[nH]c1=O           | C01689468 | -14.28 | -2.1  | -19.32 | 5.59 | 1.56  |
| 2720 | COC(=O)CNC=S                 | C01755266 | -14.28 | -0.97 | -17.08 | 5.29 | -1.53 |
| 2721 | c1(c(c(c(nc1F)F)F)Br)F       | C02545334 | -14.28 | -0.07 | -13.24 | 0.54 | -1.51 |
| 2722 | Cc1cc([nH]n1)N               | C03886974 | -14.28 | -3.83 | -14.63 | 4.47 | -0.29 |
| 2723 | c1cc2nccn2nc1                | C05117297 | -14.28 | -3.36 | -16.35 | 7.85 | -2.42 |
| 2724 | C=CCC(=O)c1cccc1             | C05606416 | -14.28 | 0.21  | -14.89 | 5.24 | -4.85 |
| 2725 | Cc1cc(cs1)CCl                | C19754921 | -14.28 | -0.96 | -11.33 | 2.19 | -4.18 |
| 2726 | c1c(nc(cn1)Br)Cl             | C32914877 | -14.28 | -1.26 | -14.09 | 2.54 | -1.48 |
| 2727 | c1ccc(c(c1)CO)N              | C00331680 | -14.27 | -1.56 | -16.65 | 3.88 | 0.05  |
| 2728 | C[C@H]1C(=S)C=CO1            | C00396117 | -14.27 | -1.1  | -13.26 | 2.57 | -2.48 |
| 2729 | CC(=O)n1cccc1                | C00400012 | -14.27 | -2.2  | -14.89 | 5.73 | -2.91 |
| 2730 | c1c(c(c2nnnn2n1)N)Cl         | C01713793 | -14.27 | -4.36 | -17.03 | 6.6  | 0.53  |
| 2731 | c1cc(c(cc1F)C=O)O            | C02572869 | -14.27 | -3.47 | -14.06 | 5.36 | -2.1  |
| 2732 | CC1=COCCO1                   | C05217915 | -14.27 | -1.29 | -14.68 | 3.2  | -1.5  |
| 2733 | Cn1cc[nH+]c1                 | C06165925 | -14.27 | -1.96 | -14.72 | 5.11 | -2.7  |
| 2734 | c1c(c2c([nH]cn2)nn1)N        | C08616408 | -14.27 | -3.55 | -18.91 | 8.57 | -0.38 |
| 2735 | C=CCC(=O)Cl                  | C13380327 | -14.27 | -0.87 | -13.96 | 2.83 | -2.27 |
| 2736 | Cc1c(ccc(n1)N)F              | C21297356 | -14.27 | -4.28 | -13.02 | 4.52 | -1.48 |
| 2737 | Cc1cccc1S                    | C21303045 | -14.27 | -1.21 | -10.93 | 1.75 | -3.88 |
| 2738 | Cc1c[nH]nc1C(F)F             | C00066375 | -14.26 | -0.42 | -14.62 | 2.72 | -1.94 |
| 2739 | COC(=O)C(=O)CBr              | C01606708 | -14.26 | -1.1  | -14.37 | 3.72 | -2.51 |
| 2740 | C=CC[NH+]=C=S                | C01687017 | -14.26 | 0.33  | -14.08 | 1.46 | -1.96 |
| 2741 | COc1ccc(cn1)F                | C02384083 | -14.26 | -1.19 | -14.67 | 2.7  | -1.1  |
| 2742 | CCSc1nnc(n1N)C(F)F           | C02536950 | -14.26 | -2.73 | -13.3  | 4.81 | -3.04 |
| 2743 | CNc1nnns1                    | C03844498 | -14.26 | -2.8  | -16.96 | 5.61 | -0.11 |
| 2744 | c1c(c(n[nH]1)/C=N/O)Cl       | C04262682 | -14.26 | -3.94 | -14.68 | 3.65 | 0.71  |
| 2745 | c1cc(oc1)CNC(=S)N            | C00116470 | -14.25 | -1.49 | -20.33 | 9.11 | -1.54 |
| 2746 | CC(=O)c1ccc[nH]1             | C00153027 | -14.25 | -1.92 | -15.14 | 5.04 | -2.24 |
| 2747 | c1cc(oc1CBr)C(F)F            | C00161832 | -14.25 | -2.71 | -12.51 | 3.25 | -2.28 |
| 2748 | CC(=O)c1ccc(oc1)[N+](=O)[O-] | C00334121 | -14.25 | -1.12 | -14.89 | 4.57 | -2.81 |
| 2749 | c1cc(oc1)CNC=O               | C01529539 | -14.25 | -1.96 | -18.52 | 6.4  | -0.18 |
| 2750 | CC(=O)OCCC=C                 | C01601431 | -14.25 | -0.18 | -14.52 | 3.79 | -3.34 |
| 2751 | c1cc([nH]c1)C(=O)CCC#N       | C01615151 | -14.25 | -2.92 | -14.85 | 6.75 | -3.23 |
| 2752 | c1nnc2n1ncs2                 | C01657453 | -14.25 | -2.79 | -18.56 | 9.83 | -2.72 |
| 2753 | c1cc([nH]1)CCO               | C01721467 | -14.25 | -4.19 | -15.48 | 3.62 | 1.8   |
| 2754 | c1cnc(cn1)C(=O)C=[N+]=[N-]   | C03882905 | -14.25 | -1.49 | -18.46 | 5.65 | 0.06  |
| 2755 | c1c2c([nH]c1=O)CCC2          | C04342676 | -14.25 | -1.45 | -17.88 | 6.57 | -1.49 |
| 2756 | CCOc1ccc(cn1)N               | C04352765 | -14.25 | -2.24 | -15.99 | 4.11 | -0.13 |
| 2757 | C1CC(C1)CS                   | C17013832 | -14.25 | -0.16 | -11.04 | 0.65 | -3.7  |
| 2758 | c1cc(nc(c1))N                | C19735875 | -14.25 | -1.95 | -14.55 | 4.23 | -1.97 |
| 2759 | c1cncnc1CNC=O                | C23993720 | -14.25 | 0.19  | -21.61 | 7.79 | -0.62 |
| 2760 | c1c[nH]nc1C(F)F              | C26547607 | -14.25 | -3.82 | -15.01 | 5.94 | -1.36 |
| 2761 | Cc1c(sc1)C                   | C00407027 | -14.24 | -1.38 | -14.27 | 3.61 | -2.19 |
| 2762 | c1cnc(c1)C(=O)N              | C01482000 | -14.24 | -3.54 | -17.57 | 5.78 | 1.09  |
| 2763 | CC1=CCC(=O)O1                | C01596395 | -14.24 | -1.27 | -15.4  | 5.33 | -2.9  |
| 2764 | CCOC(=O)CBr                  | C01648257 | -14.24 | -1.28 | -13.97 | 3.91 | -2.89 |
| 2765 | C=CCOCOC=O                   | C01705956 | -14.24 | -2.84 | -16.26 | 6.77 | -1.91 |
| 2766 | Cc1ncc(c(n1)N)CCl            | C01719385 | -14.24 | -4.05 | -12.83 | 4.66 | -2.02 |
| 2767 | c1cc2c(cc[nH]2)nc1           | C02040899 | -14.24 | -4    | -14.7  | 6.55 | -2.1  |
| 2768 | Cc1c(n[nH]1)[O-][N+](=O)[O-] | C03894821 | -14.24 | 0.16  | -16.49 | 5.69 | -3.6  |
| 2769 | c1c(oc1Br)CCl                | C04198765 | -14.24 | -2.35 | -15.1  | 3.87 | -0.67 |
| 2770 | c1cc2cn[nH]c2c(c1)O          | C14985814 | -14.24 | -2.77 | -16.36 | 5.16 | -0.28 |
| 2771 | c1cc(oc1)C(=O)CCCl           | C32005846 | -14.24 | -1.62 | -13.28 | 4.18 | -3.52 |
| 2772 | c1ccc2c(c1)c([nH]2)O         | C00153260 | -14.23 | -5.16 | -15.29 | 5.11 | 1.11  |
| 2773 | COC(=O)c1cncnc1              | C01713427 | -14.23 | 0.93  | -16.91 | 4.2  | -2.46 |
| 2774 | c1c(c[nH]1)CCO               | C02549368 | -14.23 | -3.18 | -16.87 | 4.96 | 0.86  |
| 2775 | c1cc(ncc1O)F                 | C02572509 | -14.23 | -3.44 | -15.38 | 4.53 | 0.06  |
| 2776 | C1(SC(S1)(F)F)F              | C05019030 | -14.23 | 0.04  | -12.4  | 0.12 | -1.99 |
| 2777 | c1c([nH]cn1)C(=O)N           | C05116852 | -14.23 | -5.61 | -17.8  | 8.37 | 0.81  |
| 2778 | c1cnc([nH]1)C(=O)N           | C05117662 | -14.23 | -4.73 | -17    | 6.24 | 1.26  |
| 2779 | CNC(=S)N(C)N=O               | C05412909 | -14.23 | -2.33 | -15.62 | 2.53 | 1.19  |
| 2780 | c1[nH]cc1C#N                 | C05426226 | -14.23 | -5.21 | -13.95 | 6.36 | -1.42 |
| 2781 | COC(=O)/C=C/Br               | C13379807 | -14.23 | -0.86 | -15.17 | 4.23 | -2.43 |
| 2782 | c1c(cc(nc1F)F)N              | C16159832 | -14.23 | -4.34 | -14.94 | 5.27 | -0.22 |
| 2783 | c1c(cnc(c1[N+](=O)[O-])N)Cl  | C19015102 | -14.23 | -1.74 | -13.77 | 3.44 | -2.16 |
| 2784 | c1cc(c(cc1Cl)N)OC(F)F        | C21984714 | -14.23 | -3.75 | -10.84 | 2.43 | -2.07 |
| 2785 | c1c(cc(cc1F)Cl)N             | C00732130 | -14.22 | -3    | -11.14 | 2.13 | -2.21 |
| 2786 | c1nc(c(c(n1)N)N)N            | C00967361 | -14.22 | -2.96 | -17.32 | 4.99 | 1.07  |

|      |                                  |           |        |       |        |       |       |
|------|----------------------------------|-----------|--------|-------|--------|-------|-------|
| 2787 | c1ccc(c(c1)CONC(=O)N)F           | C01398290 | -14.22 | -3.63 | -18.73 | 9.44  | -1.3  |
| 2788 | CSCCC(=O)Cl                      | C02522844 | -14.22 | 0.62  | -14.35 | 2.42  | -2.91 |
| 2789 | c1cc(ccc1/C=C/C=O)F              | C02580761 | -14.22 | -3.76 | -12.96 | 6.67  | -4.16 |
| 2790 | C(=C(C#N)C#N)/C=[N+](O)\[O-]     | C12378683 | -14.22 | -7    | -15.71 | 9.87  | -1.37 |
| 2791 | Cc1ccc(o1)CC#N                   | C12957816 | -14.22 | -1.88 | -15.6  | 6.75  | -3.49 |
| 2792 | Cc1cc(no1)N                      | C16981047 | -14.22 | -2.99 | -14.65 | 4.68  | -1.26 |
| 2793 | CC(=O)NCCc1ccccc1                | C00061519 | -14.21 | 0.54  | -17.84 | 5.74  | -2.65 |
| 2794 | c1cc(c(cc1NC(=O)N)F)F            | C00137453 | -14.21 | -4    | -19.2  | 9.53  | -0.54 |
| 2795 | CCn1c(ccn1)N                     | C00154804 | -14.21 | -2.48 | -14.81 | 4.67  | -1.6  |
| 2796 | Cc1ccc(cn1)O                     | C00331651 | -14.21 | -2.2  | -15.66 | 4.02  | -0.36 |
| 2797 | CC(=O)c1ccsc1                    | C00334460 | -14.21 | 0.82  | -17.54 | 5.43  | -2.91 |
| 2798 | c1ccc(cc1)Cn2c(ccn2)N            | C00807913 | -14.21 | 0.85  | -16.77 | 5.48  | -3.77 |
| 2799 | c1cc(c([nH+]c1)[O-])             | C00967325 | -14.21 | -2.53 | -15.45 | 3.8   | -0.03 |
| 2800 | c1c(c(n1)C(=O)N)N)C#N            | C01754746 | -14.21 | -1.71 | -19.62 | 5.83  | 1.29  |
| 2801 | c12c(non1)Nc3c(non3)N2           | C02273571 | -14.21 | 0.36  | -16.79 | 3.62  | -1.41 |
| 2802 | c1ccc(cc1)SC2=NN=CC2             | C05286402 | -14.21 | 1.72  | -15.81 | 3.79  | -3.91 |
| 2803 | c1cc(sc1)/C=N/N                  | C05896834 | -14.21 | -2.75 | -17.33 | 3.47  | 2.39  |
| 2804 | [H]/N=C(/C)\SCCCC                | C17023706 | -14.21 | -2.18 | -10.38 | 1.31  | -2.96 |
| 2805 | c1cc(nc(c1)Cl)N                  | C19735874 | -14.21 | -1.45 | -15.97 | 4.74  | -1.53 |
| 2806 | c1c(cnc(c1)[O-])BrCl             | C21981892 | -14.21 | -3.01 | -13.12 | 2.74  | -0.82 |
| 2807 | c1[nH]c2c(n1)c(ccn2)N            | C00000882 | -14.2  | -3.9  | -16.28 | 7.59  | -1.62 |
| 2808 | c1ccc(c(c1)C(=O)N)N              | C00152578 | -14.2  | -2.82 | -17.16 | 5.29  | 0.5   |
| 2809 | c1cc(c2cn[nH]c2c1)N              | C00169219 | -14.2  | -4.18 | -13.95 | 4.73  | -0.79 |
| 2810 | c1cc(cc(c1)F)/C=C/C#N            | C01624968 | -14.2  | -0.63 | -16.38 | 5.71  | -2.9  |
| 2811 | COc1ccc(cc1)N=C=O                | C01683477 | -14.2  | -1.24 | -14.3  | 2.58  | -1.24 |
| 2812 | Cc1ccn1                          | C01683906 | -14.2  | -1.29 | -14.49 | 3.65  | -2.07 |
| 2813 | C(#CS)c1nc(sn1)N(C(F)F)F         | C04984696 | -14.2  | 0.73  | -18.1  | 5.46  | -2.29 |
| 2814 | c1c(cnc(c1)Br)O)F                | C08698129 | -14.2  | 0.63  | -18.33 | 3.01  | 0.49  |
| 2815 | Cc1c(cno1)[N+](=O)[O-]           | C15782469 | -14.2  | -0.24 | -15.21 | 3.75  | -2.51 |
| 2816 | C=CC[C@H](c1ccc1)O               | C00403957 | -14.19 | -0.87 | -14.42 | 3.02  | -1.92 |
| 2817 | CCc1ccnccn1                      | C02509971 | -14.19 | -1.37 | -13.93 | 3.5   | -2.39 |
| 2818 | Cc1ccc(c1)NC(=S)N                | C08577652 | -14.19 | -1.12 | -12.88 | 3.09  | -3.28 |
| 2819 | c1ccc(cc1)c2ccn[nH]2             | C09238252 | -14.19 | -0.42 | -14.71 | 4.21  | -3.28 |
| 2820 | c1([nH]c(=S)[nH]1)C(=O)NN        | C10150814 | -14.19 | -5.81 | -16.71 | 6.94  | 1.39  |
| 2821 | c1c[nH]c(cc1Sc2nc[nH]n2)N        | C20370869 | -14.19 | -2.95 | -17.35 | 7.57  | -1.46 |
| 2822 | c1cnc(nc1)l                      | C21298949 | -14.19 | 0.08  | -16.65 | 4.64  | -2.25 |
| 2823 | c1cnc(cc1F)NN                    | C21987580 | -14.19 | -2.21 | -15.52 | 4.66  | -1.12 |
| 2824 | CCOc1ccccc1F                     | C00393901 | -14.18 | -1.7  | -13.06 | 4.23  | -3.66 |
| 2825 | c1cnc(nc1)Br                     | C01569572 | -14.18 | -2.36 | -14.76 | 4.94  | -2    |
| 2826 | Cc1c([nH]c(=S)[nH]1)             | C02511422 | -14.18 | -2.49 | -15.05 | 4.85  | -1.49 |
| 2827 | c1c(cn(n1)CC#N)Cl                | C02537511 | -14.18 | -3.19 | -17.57 | 9.29  | -2.7  |
| 2828 | c1c(cnc2c1[nH]cn2)Br             | C13635304 | -14.18 | -5.66 | -15.89 | 10.39 | -3.03 |
| 2829 | c1cc(ccc1Cn2c(ccn2)N)F           | C14988456 | -14.18 | 0.09  | -16.39 | 5.93  | -3.82 |
| 2830 | c1ccc(c(c1)/C(=C/C=O)\[O-])O     | C15442675 | -14.18 | -4.84 | -15.51 | 8.02  | -1.85 |
| 2831 | Cn1c(nnn1)N                      | C16890072 | -14.18 | -3.89 | -15.79 | 6.34  | -0.83 |
| 2832 | c1c(nnc(n1)Cl)Cl                 | C22005360 | -14.18 | 1.17  | -14.64 | 0.99  | -1.7  |
| 2833 | c1cc(c(cc1F)F)NC(=S)NN           | C00039569 | -14.17 | 0.33  | -19.1  | 7.28  | -2.68 |
| 2834 | c1ccc(c(c1)O)Br                  | C00388200 | -14.17 | -0.58 | -17.61 | 2.95  | 1.06  |
| 2835 | c1ccc(c(c1)/C=C/C/[N+](=O)[O-])F | C01688697 | -14.17 | -0.45 | -17.21 | 5.87  | -2.38 |
| 2836 | c1cncnc1CCl                      | C04343312 | -14.17 | -0.91 | -15.29 | 4.4   | -2.36 |
| 2837 | CCO[C@H](H)C=CCCO1               | C05809849 | -14.17 | -1.39 | -13.04 | 2.88  | -2.61 |
| 2838 | c1cc(oc1)C(=O)N=[N+]=[N-]        | C15784358 | -14.17 | 1.33  | -20.96 | 4.48  | 0.98  |
| 2839 | c1ccc(cc1)/C=C\NC=O              | C17175561 | -14.17 | 0.83  | -17.08 | 5.68  | -3.6  |
| 2840 | c1cncnc1CO                       | C00158595 | -14.16 | -1.57 | -17.28 | 4.56  | 0.13  |
| 2841 | c1csccl1C#N                      | C00165405 | -14.16 | 0.42  | -15.9  | 4.11  | -2.79 |
| 2842 | c1c(sc(n1)Cl)C=N/O               | C01386795 | -14.16 | -2.98 | -17.24 | 6.18  | -0.12 |
| 2843 | c1cc(ccc1NC(=O)C(F)F)F           | C01572856 | -14.16 | -3.36 | -13    | 4.43  | -2.23 |
| 2844 | c1cc(oc1)C#N                     | C01668241 | -14.16 | -2.18 | -14.1  | 4.4   | -2.29 |
| 2845 | C1=CC(=O)C=CC1=NO                | C01669666 | -14.16 | -6.61 | -15.49 | 7.91  | 0.03  |
| 2846 | CN(C)NC(=S)C(F)F                 | C05599631 | -14.16 | -1.15 | -13.21 | 2.38  | -2.18 |
| 2847 | c1(nnnn1O)c2nnnn2O               | C05670122 | -14.16 | -2.71 | -17.41 | 6.04  | -0.09 |
| 2848 | Cc1c(non1)[O-]                   | C05721361 | -14.16 | -2.65 | -15.04 | 4.09  | -0.57 |
| 2849 | c1cc(c(=O)[nH]c1)Br              | C08698110 | -14.16 | -0.84 | -18.23 | 4.44  | 0.48  |
| 2850 | C=CSc1ncccn1                     | C15043173 | -14.16 | 0.17  | -16.57 | 5.11  | -2.87 |
| 2851 | c1cc(c(c(c1)Br)F)N               | C16159705 | -14.16 | -1.32 | -13.74 | 3.21  | -2.31 |
| 2852 | c1cc(oc1)C(=O)CCl                | C32005474 | -14.16 | 1.14  | -17.95 | 5.54  | -2.89 |
| 2853 | Cc1cncnc1[N+](=O)[O-]            | C00332952 | -14.15 | 0.35  | -15.89 | 4.42  | -3.03 |
| 2854 | c1ccc(c(c1)C#N)O                 | C00388252 | -14.15 | 0.02  | -18.31 | 5.63  | -1.49 |
| 2855 | Cn1cccn1                         | C01845529 | -14.15 | -2.14 | -14.75 | 4.44  | -1.69 |
| 2856 | c1c(nc[nH]1)C(=S)N               | C02559873 | -14.15 | -5.15 | -17.34 | 9.5   | -1.17 |
| 2857 | Cc1cc(no1)C=O                    | C03880794 | -14.15 | -1.37 | -15.5  | 4.56  | -1.84 |
| 2858 | c1cc(c(c2c1[nH]cn2)F)F           | C04243027 | -14.15 | -2.5  | -14.77 | 6.33  | -3.21 |
| 2859 | Cc1ncc(c(n1)N)CS                 | C04362801 | -14.15 | -3.98 | -12.96 | 4.47  | -1.68 |
| 2860 | Cc1[nH]ccp1                      | C05722977 | -14.15 | -1.9  | -14.92 | 2.98  | -0.31 |
| 2861 | c1c(cncnc1)N                     | C06643306 | -14.15 | -0.52 | -15.05 | 2.78  | -1.36 |
| 2862 | CC(OCC(F)F)F)F)F                 | C08698362 | -14.15 | -0.75 | -13.57 | 2.35  | -2.18 |
| 2863 | c1c(sc(n1)N)C#N                  | C08698529 | -14.15 | -0.55 | -17.86 | 5.28  | -1.02 |
| 2864 | c1c(=O)n(c(=O)[nH]n1)N           | C16382953 | -14.15 | -3.11 | -19.04 | 6.1   | 1.9   |
| 2865 | c1(nnc(o1)[S-])C(F)F             | C16957733 | -14.15 | -3.16 | -15.29 | 2.92  | 1.38  |
| 2866 | c1cc(c(cc1F)Cl)N=C=O             | C19509523 | -14.15 | 0.18  | -14.21 | 2.15  | -2.27 |
| 2867 | c1cnc(nc1)C(F)F                  | C21297509 | -14.15 | -3.45 | -14.28 | 5.94  | -2.35 |
| 2868 | Cc1cncnc1N                       | C21300847 | -14.15 | -4.64 | -15.78 | 7     | -0.73 |
| 2869 | c1ccc(c(c1)N)Oc2cncn2            | C22141877 | -14.15 | -1.73 | -17.09 | 5.35  | -0.68 |
| 2870 | c1cc(nc(c1[N+](=O)[O-])N)N       | C22198856 | -14.15 | -2.52 | -18.79 | 7.74  | -0.58 |
| 2871 | CC(C)c1cc(n[nH]1)C#N             | C32005421 | -14.15 | -2.73 | -13.34 | 4.46  | -2.54 |
| 2872 | c1cn2ccsc2n1                     | C00330640 | -14.14 | -1.83 | -18.61 | 6.8   | -0.51 |
| 2873 | COc(=O)C(=C)Cl                   | C01664994 | -14.14 | -1.47 | -13.8  | 3.48  | -2.35 |
| 2874 | C=CC(=O)OCC(F)F)F                | C01664997 | -14.14 | -0.09 | -14.76 | 3.79  | -3.08 |
| 2875 | CC(=C)COc(=O)C                   | C01845661 | -14.14 | -0.38 | -15.49 | 4.06  | -2.33 |
| 2876 | c1cc([nH]c1)C(=O)C(F)F           | C02508541 | -14.14 | 1.57  | -17.36 | 4.23  | -2.59 |

|      |                                       |           |        |       |        |       |       |
|------|---------------------------------------|-----------|--------|-------|--------|-------|-------|
| 2877 | c1cnc(c1[N+](=O)[O-])Cl               | C02566376 | -14.14 | -0.37 | -15.48 | 4.54  | -2.83 |
| 2878 | COC(=O)Nc1cccc(c1)F                   | C03206929 | -14.14 | 0.1   | -18.87 | 6.84  | -2.21 |
| 2879 | c1cc(ccc1C#N)NN=O                     | C06535244 | -14.14 | -3.97 | -12.99 | 5.01  | -2.19 |
| 2880 | C/C(=C/CSC(=NH2+)N)/Cl                | C13693447 | -14.14 | -0.57 | -14.78 | 3.24  | -2.03 |
| 2881 | C1CN=C(N1)SCC#N                       | C16808311 | -14.14 | -1.58 | -16.14 | 4.41  | -0.83 |
| 2882 | c1cc(c(cc1F)F)[N+](=O)[O-]            | C00164453 | -14.13 | -2.13 | -13.15 | 5.06  | -3.9  |
| 2883 | C1CN2C(=CSC2=N1)N                     | C00274793 | -14.13 | -3.53 | -14.66 | 4.68  | -0.62 |
| 2884 | c1c(csn1)C#N                          | C01618092 | -14.13 | -2.06 | -14.41 | 4.23  | -1.88 |
| 2885 | CC(=O)Oc1ccc(cc1)[N+](=O)[O-]         | C01641045 | -14.13 | -1.33 | -14.77 | 6.8   | -4.83 |
| 2886 | c1c(c[nH]c1C=O)I                      | C02519474 | -14.13 | -5.56 | -13.24 | 4.35  | 0.32  |
| 2887 | c1csc(c1)CC(=O)Cl                     | C02574167 | -14.13 | 0.94  | -18.3  | 3.86  | -0.63 |
| 2888 | c1ccc(c(c1)OCC#N)F                    | C02685693 | -14.13 | -2.39 | -14.05 | 6.37  | -4.06 |
| 2889 | c1ccc(cc1)/C=N/N=C(N)N                | C04342962 | -14.13 | -0.71 | -16.94 | 6.68  | -3.16 |
| 2890 | C1CCC(=CC1)CCO                        | C04684325 | -14.13 | -2.17 | -15.1  | 1.96  | 1.18  |
| 2891 | C/C=C/Cc1ccccc1O                      | C08580485 | -14.13 | -0.67 | -16.15 | 2.87  | -0.17 |
| 2892 | Cc1csc(n1)CCl                         | C11764196 | -14.13 | -0.62 | -14.37 | 3.67  | -2.8  |
| 2893 | C(#N)c1c(c(n1)Cl)Cl                   | C15443044 | -14.13 | -1.78 | -11.47 | 1.77  | -2.65 |
| 2894 | COc1nc([nH]n1)N                       | C17024988 | -14.13 | -5.54 | -15.51 | 5.98  | 0.93  |
| 2895 | c1cc2c(cc1Br)nn[nH]2                  | C19859472 | -14.13 | -1.17 | -16.61 | 5.36  | -1.72 |
| 2896 | c1cc(c(cc1N)Cl)F                      | C00157622 | -14.12 | 0.15  | -15.32 | 3.29  | -2.23 |
| 2897 | Cc1c(ccc1O)N                          | C00407044 | -14.12 | -3.52 | -13.57 | 3.33  | -0.36 |
| 2898 | c12c([nH]n1)Nc3c(non3)N2              | C01194591 | -14.12 | -7.11 | -13.45 | 7     | -0.56 |
| 2899 | CC(=O)OCC(=C)Cl                       | C01681466 | -14.12 | 0.44  | -15.77 | 4.42  | -3.21 |
| 2900 | CCCCN=C=S                             | C01845901 | -14.12 | -0.6  | -15.15 | 1.14  | 0.49  |
| 2901 | Cc1cc(cnc1)O                          | C01871320 | -14.12 | -2.27 | -15.25 | 3.79  | -0.38 |
| 2902 | Cn1cncn1                              | C02034214 | -14.12 | -2.97 | -14.41 | 5.93  | -2.67 |
| 2903 | c1cc(oc1)C(=O)CBr                     | C02525565 | -14.12 | 1.22  | -17.3  | 4.96  | -2.99 |
| 2904 | c1cc(oc1)C(=O)N                       | C03848454 | -14.12 | -3.48 | -17.23 | 6.06  | 0.52  |
| 2905 | c1ccc(cc1)CCN=[N+]=[N-]               | C04748468 | -14.12 | -0.34 | -15.28 | 1.9   | -0.39 |
| 2906 | CC(=O)c1cc[nH]1                       | C05386998 | -14.12 | -3.77 | -17.1  | 6.3   | 0.45  |
| 2907 | c1cc(c(c1F)N)[N+](=O)[O-]             | C05784415 | -14.12 | -2.04 | -16.45 | 4.88  | -0.51 |
| 2908 | C1Cc2c([nH]nc2C(F)(F)F)C1             | C05799093 | -14.12 | -3.03 | -11.65 | 3.41  | -2.86 |
| 2909 | c1cc(sc1)/C=C/C=O                     | C05843463 | -14.12 | -1.98 | -17.75 | 6.53  | -0.92 |
| 2910 | c1nc(c(c1)Cl)F)Cl                     | C08698232 | -14.12 | -0.5  | -13.01 | 1.95  | -2.56 |
| 2911 | c1cc(c(cc1O)O)F                       | C16158134 | -14.12 | -3.45 | -15.95 | 4.33  | 0.95  |
| 2912 | CCn1cc(cc1N)C                         | C16162964 | -14.12 | -2.93 | -11.18 | 3.35  | -3.36 |
| 2913 | c1(c(nsn1)N)C(=O)N                    | C17163632 | -14.12 | -3.55 | -18    | 4.58  | 2.85  |
| 2914 | CCNc1cccnc1                           | C19884497 | -14.12 | -2.33 | -13.68 | 3.82  | -1.92 |
| 2915 | [C@H-](C(=[NH2+]N)N)C(C(F)F)(F)F      | C20518719 | -14.12 | -5.49 | -15.02 | 7.24  | -0.85 |
| 2916 | C=C1CCCC1=O                           | C21982782 | -14.12 | -0.97 | -14.16 | 3.85  | -2.83 |
| 2917 | CCc1ccc(C)cc1                         | M1995A043 | -14.12 | -0.68 | -9.8   | 1.34  | -4.99 |
| 2918 | c1cc(cnc1)C(=O)N                      | C00005878 | -14.11 | -3.61 | -17.29 | 6.45  | 0.35  |
| 2919 | c1c(cnc1)Cl)N                         | C00332989 | -14.11 | -0.99 | -17.38 | 2.95  | 1.31  |
| 2920 | COc1cncn1                             | C00409287 | -14.11 | -0.52 | -17.8  | 3.85  | 0.36  |
| 2921 | c1cc(oc1)C(=O)C(=O)N                  | C01707277 | -14.11 | -1.43 | -18.73 | 6.36  | -0.31 |
| 2922 | c1c(c(nc(=S)[nH]1)N)N                 | C02164504 | -14.11 | -5.85 | -15.11 | 5.78  | 1.07  |
| 2923 | C[C@H](C(=O)Br)Br                     | C02242574 | -14.11 | 0.41  | -13.95 | 1.9   | -2.47 |
| 2924 | c1cc(ccc1)/C=N/O)O                    | C04578804 | -14.11 | -0.99 | -18.91 | 5.41  | 0.39  |
| 2925 | Cc1c(c1=O)c2ccccc2                    | C06068885 | -14.11 | -0.29 | -19.42 | 6.64  | -1.04 |
| 2926 | c1c(nsc1Cl)[O-]                       | C09226750 | -14.11 | -2.1  | -16.75 | 5.19  | -0.46 |
| 2927 | COc1cnc(c1)N                          | C15635457 | -14.11 | -1.74 | -16.52 | 5.61  | -1.47 |
| 2928 | c1(nc(n1)O)N                          | C16931802 | -14.11 | -3.02 | -16.41 | 4.06  | 1.25  |
| 2929 | c1cncnc1C[NH3+]                       | C20417407 | -14.11 | -2.27 | -17.98 | 5.45  | 0.68  |
| 2930 | CSc1ccc(nc1)Br                        | C21953220 | -14.11 | -0.64 | -13.32 | 3.11  | -3.27 |
| 2931 | c1cc(c(c1)F)C(=N)O)F                  | C00075251 | -14.1  | -2.04 | -16.72 | 6.33  | -1.67 |
| 2932 | C[C@H](c1ccc1)O                       | C00164797 | -14.1  | -1.73 | -14.76 | 3.09  | -0.7  |
| 2933 | Cc1c[nH]n1                            | C00897288 | -14.1  | -2.15 | -14.69 | 3.91  | -1.17 |
| 2934 | c1c(cnn2c1nnc2)N                      | C01730469 | -14.1  | -3.67 | -19.92 | 11.01 | -1.52 |
| 2935 | c1[n-]c(c1n1)[N+](=O)[O-][N+](=O)[O-] | C04468969 | -14.1  | -5.31 | -15.44 | 10.98 | -4.33 |
| 2936 | C/C(=C)Cl)CO                          | C05104107 | -14.1  | -3.32 | -12.84 | 2.56  | -0.51 |
| 2937 | Cc1ccc(c1)F)O                         | C21300193 | -14.1  | -1.9  | -14.14 | 3.73  | -1.79 |
| 2938 | C1CC(C1)C(=O)N=C=S                    | C22148233 | -14.1  | -0.26 | -15.24 | 3.78  | -2.39 |
| 2939 | c1cc2c(cc1N=C=O)CCO2                  | C00158514 | -14.09 | -1.6  | -13.85 | 3.01  | -1.66 |
| 2940 | c1cc(ccc1C(F)(F)F)Br                  | C00164872 | -14.09 | -1    | -12.59 | 1.44  | -1.93 |
| 2941 | c1ccc(c(c1)C(F)(F)F)O                 | C00164884 | -14.09 | -2.25 | -14.55 | 3.75  | -1.04 |
| 2942 | c1cc(ccc1NN)SC#N                      | C00393806 | -14.09 | -1.14 | -15.67 | 4.73  | -2.01 |
| 2943 | C=CC(=O)OCC=C                         | C01632702 | -14.09 | 1.4   | -15.15 | 3.48  | -3.83 |
| 2944 | CSC(=O)C(=O)SC                        | C01757821 | -14.09 | -1.03 | -15.8  | 3.11  | -0.37 |
| 2945 | c1cc(c(cc1Br)F)N=C=O                  | C02568114 | -14.09 | -2.02 | -13.68 | 2.19  | -0.58 |
| 2946 | Cc1[n-]nc(n1)C(F)(F)F                 | C03883866 | -14.09 | -4.78 | -12.79 | 5.63  | -2.14 |
| 2947 | c1c(nc[nH]1)CCl                       | C15894707 | -14.09 | -4.41 | -12.75 | 5.63  | -2.56 |
| 2948 | c1cc(ccc1NN)O                         | C19386006 | -14.09 | -1.88 | -18.79 | 5.93  | 0.64  |
| 2949 | c1cnc([nH]1)C=O                       | C01069165 | -14.08 | -2.51 | -16.16 | 5.41  | -0.81 |
| 2950 | c1(=O)c(nnc([nH]1)[O-])I              | C01078850 | -14.08 | -1.21 | -17.24 | 3.38  | 0.99  |
| 2951 | c1cnc(nc1N)Cl                         | C01595944 | -14.08 | -4.83 | -13.48 | 5.08  | -0.85 |
| 2952 | Cc1c(c[nH]n1)N                        | C04244016 | -14.08 | -3.72 | -14.89 | 4.21  | 0.32  |
| 2953 | CSC1=NCCCS1                           | C04284607 | -14.08 | 1.13  | -15.31 | 2.36  | -2.26 |
| 2954 | C(C(=S)N)C(=S)N                       | C05410038 | -14.08 | -2.36 | -14.57 | 2.96  | -0.12 |
| 2955 | CCOc1ccc(=O)[nH]n1                    | C17014098 | -14.08 | -3.22 | -17.3  | 5.76  | 0.69  |
| 2956 | CC(=O)c1cncn1C                        | C19091704 | -14.08 | 1.26  | -17.02 | 4.39  | -2.71 |
| 2957 | c1ccc(c(c1)NCC#N)F                    | C20052436 | -14.08 | -3.6  | -13.5  | 6.05  | -3.04 |
| 2958 | c1cc(c(cc1Br)N)N                      | C00158488 | -14.07 | -0.82 | -15.09 | 2.68  | -0.84 |
| 2959 | c1cc(ncc1Br)Cl                        | C00404153 | -14.07 | -1.4  | -15.37 | 2.25  | 0.45  |
| 2960 | c1cc2c(cc1N=C=O)OCO2                  | C02387324 | -14.07 | -2.23 | -14.39 | 3.35  | -0.8  |
| 2961 | c1ccc(c(c1)OC(F)(F)F)F                | C02560216 | -14.07 | 1.53  | -15.54 | 3.26  | -3.32 |
| 2962 | c1cc(c(cc1F)F)C(=N)O)N                | C04365212 | -14.07 | -3.8  | -15.41 | 6.18  | -1.03 |
| 2963 | C1CN=C(N1)N=[N+]=[N-]                 | C04722293 | -14.07 | -0.74 | -16.99 | 2.94  | 0.72  |
| 2964 | c1cc(c(=O)[nH]c1)N                    | C08698104 | -14.07 | -4.82 | -16.73 | 5.04  | 2.45  |
| 2965 | Cc1csc(n1)Cl                          | C12505746 | -14.07 | -0.64 | -14.33 | 3.08  | -2.18 |
| 2966 | CCN1CCCC1=O                           | C14684426 | -14.07 | -2.24 | -13.67 | 2.81  | -0.97 |



|      |                                |           |        |       |        |       |       |
|------|--------------------------------|-----------|--------|-------|--------|-------|-------|
| 2967 | C[C@@H]1CC(=NO1)[N+](=O)[O-]   | C15783913 | -14.07 | 0.31  | -16.28 | 4.89  | -3    |
| 2968 | Cc1cc(on1)N/C=N/O              | C15934904 | -14.07 | -2.4  | -19.76 | 8.56  | -0.47 |
| 2969 | c1c(c(=O)nc([nH]1)N)O          | C17378517 | -14.07 | -6.82 | -18.29 | 10.13 | 0.91  |
| 2970 | c1cc(ccc1NC(=S)C(=O)N)Cl       | C20478536 | -14.07 | -6.15 | -13.08 | 6.4   | -1.24 |
| 2971 | CCC(=O)N=C=S                   | C22149244 | -14.07 | -1.5  | -14.94 | 3.76  | -1.4  |
| 2972 | c1cc(c(cc1Br)N)O               | C00078184 | -14.06 | -1.09 | -15.52 | 2.73  | -0.18 |
| 2973 | c1c(c(cc(c1O)Cl)F)N            | C00167400 | -14.06 | -0.13 | -17.14 | 3.28  | -0.07 |
| 2974 | c1ccoc1C#N                     | C01581465 | -14.06 | -2.68 | -14.12 | 4.99  | -2.24 |
| 2975 | CCOC(=O)CSC#N                  | C01591776 | -14.06 | -1.6  | -14.3  | 4.83  | -2.99 |
| 2976 | CC1=CCCO1                      | C02039526 | -14.06 | -0.5  | -13.44 | 1.99  | -2.11 |
| 2977 | c1ccc(cc1)NCC(F)(F)F           | C02040769 | -14.06 | -1.58 | -13.36 | 2.3   | -1.41 |
| 2978 | c1nc(c(c(n1)N)N=O)N            | C04558794 | -14.06 | -3.14 | -16.14 | 4.8   | 0.42  |
| 2979 | CCc1nc([nH]n1)N                | C06820881 | -14.06 | -2.07 | -15.26 | 5.23  | -1.95 |
| 2980 | C(=[NH+]/N)(C(=[NH+]/N)[S-])/N | C13409865 | -14.06 | -3.37 | -16.13 | 3.3   | 2.14  |
| 2981 | c1c(nc(s1)C(=O)C(F)F)F         | C20438837 | -14.06 | -4.44 | -12.66 | 4.93  | -1.89 |
| 2982 | C#CCOc1cccn1                   | C21993371 | -14.06 | -0.29 | -18.69 | 6.19  | -1.28 |
| 2983 | c1ccc(c(c1)C=N/O)N             | C00330045 | -14.05 | -4.39 | -13.09 | 3.84  | -0.41 |
| 2984 | c1cnc2c1C(=O)OC2               | C01592491 | -14.05 | -2.26 | -16.45 | 6.96  | -2.29 |
| 2985 | c1cc(ccc1NCC#N)O               | C02023082 | -14.05 | -2.88 | -16.9  | 6.49  | -0.77 |
| 2986 | c1cnn(n1)CCO                   | C02513898 | -14.05 | -4.51 | -15.97 | 5.05  | 1.38  |
| 2987 | Cc1cc(cnc1)C                   | C08294960 | -14.05 | -0.57 | -13.3  | 2.89  | -3.07 |
| 2988 | c1c(c([nH]c(=O)c1Cl)Cl         | C08672844 | -14.05 | -4.31 | -15.86 | 7.92  | -1.8  |
| 2989 | c1c([nH]cn1)CCCl               | C13283532 | -14.05 | -0.58 | -16.05 | 5.71  | -3.13 |
| 2990 | C/C=C/C(=O)OC                  | C13380319 | -14.05 | -1.03 | -14    | 3.56  | -2.58 |
| 2991 | CC(=O)Oc1ccc(=O)[nH]c1         | C17105134 | -14.05 | -2.74 | -19.99 | 10.65 | -1.97 |
| 2992 | Cc1c(c([nH]n1)Cl               | C17946022 | -14.05 | -5.08 | -12.23 | 4.76  | -1.5  |
| 2993 | c1cc(oc1)CCO                   | C19729362 | -14.05 | -2.81 | -15.37 | 4.53  | -0.4  |
| 2994 | c1c2c(=O)[nH]cnn2cn1           | C22013543 | -14.05 | -3.7  | -18.92 | 10.68 | -2.11 |
| 2995 | c1cscc1SCCO                    | C01598574 | -14.04 | -3.92 | -11.98 | 3.18  | -1.32 |
| 2996 | C(CC)OC(=O)Cl                  | C02031641 | -14.04 | 0.07  | -14.67 | 3.09  | -2.53 |
| 2997 | c1(nc(sn1)Cl)Cl                | C04254807 | -14.04 | -2.13 | -14.86 | 1.67  | 1.28  |
| 2998 | C1=CC(C=C1)CO                  | C05133144 | -14.04 | -1.83 | -13.74 | 2.45  | -0.92 |
| 2999 | c1cc(cnc1)NC(=S)N              | C05161968 | -14.04 | 0.04  | -19.09 | 5.38  | -0.38 |
| 3000 | CC(=O)c1cscn1                  | C06357117 | -14.04 | -2.13 | -16.38 | 4.86  | -0.39 |
| 3001 | c1cnc(c1)[N+](=O)[O-]          | C08294941 | -14.04 | -3.28 | -16.11 | 8.78  | -3.43 |
| 3002 | Cc1c(n2c(nn1)nnn2)[O-]         | C08834353 | -14.04 | -4.75 | -17.49 | 8.18  | 0.02  |
| 3003 | COc(=O)C=C1                    | C14556351 | -14.04 | -0.41 | -14.46 | 3.61  | -2.78 |
| 3004 | c1cnc(c1N)C(F)F                | C19735127 | -14.04 | -3.44 | -13.44 | 4.08  | -1.25 |
| 3005 | c1cc(c(c(c1)O)N)N              | C00389621 | -14.03 | -3.75 | -15.42 | 3.53  | 1.6   |
| 3006 | c1cc(ccc1CCC#N)O               | C01635610 | -14.03 | -2.19 | -15.73 | 6.54  | -2.64 |
| 3007 | c1[nH]c(c(n1)Cl)Cl             | C01728337 | -14.03 | -3.33 | -13.56 | 5.13  | -2.27 |
| 3008 | c1c(cn[nH]1)C=O                | C02738050 | -14.03 | -4.36 | -15.23 | 6.1   | -0.55 |
| 3009 | C1=CC(=O)C=C1O                 | C04521345 | -14.03 | -4.11 | -15.21 | 5.53  | -0.24 |
| 3010 | Cc1cc(cnc1)N                   | C08698082 | -14.03 | -1.21 | -15.37 | 3.52  | -0.97 |
| 3011 | Cc1ccc(c(c1F)N)Cl              | C12359282 | -14.03 | -2.53 | -13.47 | 2.08  | -0.11 |
| 3012 | c1c(c([nH]n1)N)C(=O)N          | C17039868 | -14.03 | -5.6  | -17.68 | 6.8   | 2.45  |
| 3013 | c1ccc(cc1)OC2cnns2             | C01388237 | -14.02 | -0.5  | -16.93 | 3.89  | -0.47 |
| 3014 | COc1=CC=CCC1                   | C01841394 | -14.02 | -1.2  | -13.82 | 1.96  | -0.96 |
| 3015 | C(C(F)F)O[C@@H](F)Cl           | C02389410 | -14.02 | -0.3  | -14.27 | 2.49  | -1.93 |
| 3016 | C=CCOC([C@@H](F)Cl)(F)F        | C02579135 | -14.02 | -0.91 | -13.18 | 2.13  | -2.06 |
| 3017 | CCSC(=[NH2+])N                 | C03806245 | -14.02 | -2.18 | -13.46 | 2.12  | -0.5  |
| 3018 | C=CCSC(=[NH2+])N               | C05193890 | -14.02 | -2.43 | -15.15 | 2.14  | 1.42  |
| 3019 | c1cc(=S)[nH]nc1                | C06512974 | -14.02 | -2.71 | -15.71 | 5.7   | -1.3  |
| 3020 | C(=C(C(F)F)[O-])C(=O)C(F)F     | C08700988 | -14.02 | -5.71 | -14.48 | 8.28  | -2.12 |
| 3021 | c1cnn(n1)CCC#N                 | C12505453 | -14.02 | -1    | -17.84 | 6.47  | -1.65 |
| 3022 | c1(c(nc([nH]c1=O)N)N)Cl        | C17158224 | -14.02 | -4.33 | -16.52 | 4.78  | 2.06  |
| 3023 | c1cc(c(nc1)N)OC(F)F            | C20483737 | -14.02 | -1.38 | -17.43 | 5.67  | -0.88 |
| 3024 | Cc1cnc(c1F)N                   | C21981826 | -14.02 | -3.04 | -13.35 | 3.98  | -1.61 |
| 3025 | CC(=O)c1ncc(s1)Br              | C22007396 | -14.02 | -0.39 | -14    | 2.74  | -2.37 |
| 3026 | c1cc(ncc1NN)Cl                 | C22200171 | -14.02 | -2.54 | -16.9  | 5.93  | -0.52 |
| 3027 | CCCc1cccs1                     | C01631214 | -14.01 | -0.68 | -13.97 | 1.41  | -0.77 |
| 3028 | Cc1ccc(c(c1)O)C                | C01641024 | -14.01 | -2.29 | -12.16 | 2.76  | -2.31 |
| 3029 | c1cnn(c1N)N                    | C02023828 | -14.01 | -4.37 | -17.17 | 6.52  | 1.01  |
| 3030 | c1cnc(cn1)C(=O)Cl              | C02569383 | -14.01 | -3.34 | -14.32 | 4.67  | -1.02 |
| 3031 | c1cc2n(c1)CCC2                 | C04914414 | -14.01 | -0.39 | -16.28 | 3.32  | -0.66 |
| 3032 | C1C2=CC=NC2=NC=C1O             | C06643323 | -14.01 | -2.76 | -16.52 | 5.92  | -0.65 |
| 3033 | Cc1c2cccnc2[nH]n1              | C12336552 | -14.01 | -1.75 | -16.1  | 6.08  | -2.25 |
| 3034 | Cc1cc[nH+][cc1][O-]            | C13511085 | -14.01 | -2.35 | -15.16 | 3.89  | -0.4  |
| 3035 | Cc1cncnc1Cl                    | C14982420 | -14.01 | -0.94 | -13.75 | 3.39  | -2.7  |
| 3036 | c1c(onc2c1[nH]nn2)Br           | C19857217 | -14.01 | -1.36 | -19.66 | 8.27  | -1.26 |
| 3037 | c1cc(ccc1OC(=O)N)Cl            | C32603035 | -14.01 | -1.22 | -18.96 | 6.92  | -0.75 |
| 3038 | Cc1ccc(nn1)N                   | C00153000 | -14    | -3.33 | -16.08 | 6.21  | -0.8  |
| 3039 | Cc1c(c(on1)C)N                 | C00158485 | -14    | -2.77 | -14.51 | 4.33  | -1.05 |
| 3040 | c1cc(c(nc1)Cl)Cl               | C00333069 | -14    | -2.45 | -12.66 | 3.88  | -2.77 |
| 3041 | Cc1nn2cnn2s1                   | C01657454 | -14    | -2.99 | -17.07 | 9.13  | -3.07 |
| 3042 | Cn1cc(nc1)I                    | C02382639 | -14    | -2.24 | -13.17 | 5.13  | -3.72 |
| 3043 | Cc1cc(on1)C                    | C02504362 | -14    | -1.78 | -13.76 | 4.08  | -2.54 |
| 3044 | c1cc(c(cc1Cl)O)Br              | C02512340 | -14    | -3.4  | -12.68 | 4.18  | -2.11 |
| 3045 | c1c(cc(cc1F)Cl)O               | C02584280 | -14    | -3.06 | -11.52 | 2.27  | -1.69 |
| 3046 | c1c2c([nH]n1)ncnc2Cl           | C03865628 | -14    | -2.62 | -13.4  | 4.1   | -2.09 |
| 3047 | c1cc(c(nc1)c2ccco2)N           | C04244134 | -14    | -2.6  | -15.17 | 5.89  | -2.11 |
| 3048 | c1cc(cnc1)C(=S)N               | C05842709 | -14    | -2.18 | -15.87 | 2.93  | 1.12  |
| 3049 | CCc1cc(n[nH]1)N                | C12359712 | -14    | -2.33 | -15.07 | 4.37  | -0.97 |
| 3050 | c1nc(nc(n1)Cl)Cl               | C12650759 | -14    | -0.18 | -13.77 | 2.72  | -2.76 |
| 3051 | c1cc(c(nc1)NN)F                | C16158483 | -14    | -1.7  | -15.19 | 4     | -1.11 |
| 3052 | c1cnc(cc1N)Cl                  | C19015383 | -14    | -4.03 | -13.28 | 4.04  | -0.73 |
| 3053 | Cc1cnn(c1N)C                   | C19090099 | -14    | -3.06 | -14.21 | 4.8   | -1.54 |
| 3054 | c1cnc(cc1C#N)N                 | C19424559 | -14    | -0.99 | -16.78 | 5.09  | -1.33 |
| 3055 | c1cc(nc(c1C#N)N)C(F)F          | C26461729 | -14    | -4.05 | -12.69 | 4.81  | -2.07 |
| 3056 | C1Cc2c(sc(n2)Br)C1             | C31772066 | -14    | -0.36 | -13.92 | 3.61  | -3.33 |

|      |                               |           |        |       |        |       |       |
|------|-------------------------------|-----------|--------|-------|--------|-------|-------|
| 3057 | C(CO)n1c(nnn1)N               | C01564350 | -13.99 | -5.89 | -16.75 | 7.51  | 1.14  |
| 3058 | c1cc2c(nc1)CCC2               | C01846564 | -13.99 | -0.28 | -13.83 | 3.63  | -3.51 |
| 3059 | c1cc(oc1)CSC=O                | C01850318 | -13.99 | -0.23 | -18.1  | 6.97  | -2.63 |
| 3060 | c1cc(sc1)F                    | C02578015 | -13.99 | -1.43 | -13.58 | 2.02  | -1    |
| 3061 | Cc1cc(on1)C(=O)Cl             | C12370184 | -13.99 | 1.41  | -15.87 | 2.73  | -2.26 |
| 3062 | C[C@H](c1ccc(c(c1)F)F)O       | C12506427 | -13.99 | -1.28 | -14.78 | 4.27  | -2.2  |
| 3063 | c1cc(c(cc1N)F)C#N             | C16125829 | -13.99 | -0.09 | -17.97 | 6.08  | -2    |
| 3064 | [H]/N=C(N)/[NH+]=C/c1cccs1    | C16430445 | -13.99 | -0.99 | -14.68 | 4.14  | -2.46 |
| 3065 | c1cc(cnc1)CN/C(=[NH+]/N)/[S-] | C18202848 | -13.99 | 1.83  | -18.75 | 3.9   | -0.97 |
| 3066 | [H]/N=c/1/n(nnn1CCO)C         | C32107231 | -13.99 | -4.66 | -14.58 | 5.44  | -0.19 |
| 3067 | #Cc1ncc(cn1)Br                | C32911350 | -13.99 | 1.45  | -18.3  | 5.66  | -2.79 |
| 3068 | CNc1ccc(cc1)O                 | C00388191 | -13.98 | -2.6  | -14.37 | 3.34  | -0.35 |
| 3069 | c1cnn(c1)CCO                  | C01671842 | -13.98 | -3.29 | -15.86 | 4.81  | 0.35  |
| 3070 | CCNc1nncs1                    | C01680369 | -13.98 | -2.85 | -15.1  | 5.42  | -1.46 |
| 3071 | c1cn(nc1[N+](=O)[O-])CCl      | C02536477 | -13.98 | -3.68 | -15.7  | 9.09  | -3.69 |
| 3072 | Cc1c(snn1)C(=O)Cl             | C02555783 | -13.98 | 1     | -16.01 | 2.6   | -1.57 |
| 3073 | c1c(nc(nc1F)N)NN              | C02565662 | -13.98 | -1.98 | -16.81 | 5.21  | -0.39 |
| 3074 | CCC(=C(C)C(=O)C(F)F)[O-]      | C04430787 | -13.98 | 0.27  | -13.89 | 2.7   | -3.06 |
| 3075 | CO/N=C/c1cccnc1               | C05496351 | -13.98 | 0.22  | -16.86 | 4.75  | -2.09 |
| 3076 | COc1c(non1)O                  | C05794883 | -13.98 | -1.76 | -17.47 | 4.04  | 1.21  |
| 3077 | Cn1c(nnn1)NC#N                | C06494464 | -13.98 | -4.46 | -14.93 | 9.16  | -3.75 |
| 3078 | C(#N)C(F)FBr                  | C08698276 | -13.98 | -0.28 | -12.62 | 1.06  | -2.13 |
| 3079 | c1c(oc(=O)oc1)ClCl            | C01760794 | -13.97 | -1.08 | -12.47 | 1.79  | -2.22 |
| 3080 | c1c([nH]nc1O)C(F)F            | C04262653 | -13.97 | -3.51 | -15.47 | 3.14  | 1.86  |
| 3081 | CCC(=O)CC(=O)C(=O)OC          | C05052153 | -13.97 | 1.85  | -19.41 | 4.97  | -1.38 |
| 3082 | C1CNC(=S)NC1                  | C06661066 | -13.97 | -2.13 | -14.33 | 2.67  | -0.18 |
| 3083 | [C@H](C(=O)Cl)FCl             | C16159206 | -13.97 | 0.05  | -14.27 | 2.15  | -1.89 |
| 3084 | c1c2c(cc(c1F)Cl)n[nH]n2       | C00152702 | -13.96 | -3.45 | -15.41 | 3.31  | 1.59  |
| 3085 | c1cc(ncc1Br)[N+](=O)[O-]      | C00331611 | -13.96 | -2.2  | -13.46 | 5.56  | -3.86 |
| 3086 | c1ccc(cc1)CC=O                | C00895323 | -13.96 | 0.77  | -15.59 | 4.53  | -3.68 |
| 3087 | c1cc([nH]c1)C(=O)CCl          | C01574410 | -13.96 | -2.32 | -14.69 | 5.76  | -2.71 |
| 3088 | c1cc(c(cc1C#N)N)O             | C01704673 | -13.96 | -0.74 | -17.9  | 4.66  | 0.03  |
| 3089 | c1ccc(cc1)C(=O)CF             | C02040597 | -13.96 | 0.2   | -17.22 | 6.89  | -3.84 |
| 3090 | c1c[nH]c(cc1=O)F              | C02599000 | -13.96 | -2.47 | -16.15 | 4.6   | 0.07  |
| 3091 | C1CC=C[C@H](C1)O              | C04744355 | -13.96 | -1.53 | -13.23 | 1.88  | -1.09 |
| 3092 | c1cnc(cn1)C#N                 | C00164542 | -13.95 | -2.95 | -15.48 | 5.56  | -1.08 |
| 3093 | CCOC1ccncc1F                  | C00331921 | -13.95 | -1.18 | -14.75 | 4.25  | -2.26 |
| 3094 | c1cc(c(c(c1)O)N)O             | C01680023 | -13.95 | -3.7  | -16.29 | 3.78  | 2.26  |
| 3095 | c1cc(c(cc1Br)N)F              | C02243118 | -13.95 | -1.4  | -14.95 | 1.78  | 0.63  |
| 3096 | CCc1cc(no1)N                  | C05341526 | -13.95 | -1.18 | -15.33 | 4.42  | -1.87 |
| 3097 | c1c(nc(cn1)N)C#N              | C08698476 | -13.95 | -3.77 | -16.33 | 6.2   | -0.05 |
| 3098 | c1[nH]nc(n1)C(=O)N            | C11612727 | -13.95 | -5.54 | -16.3  | 4.78  | 3.11  |
| 3099 | C1=CN=N[C@H]1C=O              | C14808558 | -13.95 | -3.94 | -15.99 | 6.51  | -0.53 |
| 3100 | c1cc(c(=O)oc1)Cl              | C21989733 | -13.95 | -2.36 | -17.39 | 8.85  | -3.04 |
| 3101 | c1c2c(cnn1)nc[n-]2            | C26506602 | -13.95 | -4.45 | -18.67 | 10.17 | -0.99 |
| 3102 | c1cc(c(cc1O)Br)O              | C00388415 | -13.94 | -1.24 | -16.87 | 3.78  | 0.39  |
| 3103 | c1cc(cc(c1)O)C#N              | C00388758 | -13.94 | -0.31 | -16.97 | 4.85  | -1.51 |
| 3104 | C=CC(=O)OC(C(F)F)C(F)F        | C01841395 | -13.94 | -1.72 | -11.09 | 3.5   | -4.64 |
| 3105 | Cc1cc(cnc1)Cl                 | C02599045 | -13.94 | 0.25  | -13.55 | 2.3   | -2.93 |
| 3106 | Cc1csc(=O)[nH]1               | C04204717 | -13.94 | -2.42 | -16.32 | 5.56  | -0.75 |
| 3107 | c1nc(no1)/C(=N)O/N            | C05670167 | -13.94 | -5.05 | -19.08 | 7.62  | 2.57  |
| 3108 | c1ccc(cc1)C/C(=N)O/N          | C12505212 | -13.94 | -1.93 | -15.94 | 5.19  | -1.26 |
| 3109 | c1cc(cnc1)CN[NH3+]            | C20283463 | -13.94 | 1.69  | -18.97 | 3.4   | -0.06 |
| 3110 | Cc1cccc(=O)oc1                | C22004979 | -13.94 | -1.66 | -17.06 | 8.07  | -3.3  |
| 3111 | CCNC(=O)n1ccnc1               | C32628661 | -13.94 | -3.48 | -15.86 | 7.91  | -2.51 |
| 3112 | c1ccc(cc1)O)O                 | C00002028 | -13.93 | -3.04 | -16.06 | 4.16  | 1.01  |
| 3113 | CC(=O)c1cc[nH]c1              | C00153020 | -13.93 | -3.74 | -16.52 | 8.54  | -2.22 |
| 3114 | c1c(c(nen1)N)C(=O)N           | C00332913 | -13.93 | -2.68 | -18.45 | 6     | 1.2   |
| 3115 | Cc1c[nH]nc1C#N                | C01423208 | -13.93 | -0.65 | -15.52 | 3.81  | -1.57 |
| 3116 | c1cc2nenn2[nH]c1=O            | C01590753 | -13.93 | -2.31 | -19.04 | 6.94  | 0.48  |
| 3117 | CSc1ccnnc1                    | C01605910 | -13.93 | -0.98 | -17.71 | 5.26  | -0.5  |
| 3118 | Cc1ccnnc1                     | C01627093 | -13.93 | -1.66 | -16.39 | 5.88  | -1.76 |
| 3119 | c1nc(no1)C(F)F                | C02022421 | -13.93 | -3.51 | -15.44 | 5.57  | -0.54 |
| 3120 | C=CCOCC(F)F                   | C02039481 | -13.93 | 0.2   | -14.5  | 2.86  | -2.49 |
| 3121 | C(C(C(F)F)F)OC(=O)C(F)F       | C02566530 | -13.93 | 0.65  | -15.38 | 4.45  | -3.65 |
| 3122 | Cc1nc(cs1)C=O                 | C04198756 | -13.93 | -1.38 | -15.31 | 4.4   | -1.64 |
| 3123 | C1CC=COC1                     | C04726938 | -13.93 | -0.69 | -12.73 | 1.53  | -2.04 |
| 3124 | Cc1[nH]nc(n1)N[N+](=O)[O-]    | C04952531 | -13.93 | -4.47 | -18.14 | 7.18  | 1.5   |
| 3125 | CCP(=S)(O)O                   | C06424831 | -13.93 | -0.67 | -14.66 | 6.97  | -5.57 |
| 3126 | c1cnccc1CON                   | C14986311 | -13.93 | 0.74  | -18.48 | 4.2   | -0.4  |
| 3127 | c1c(c(c(cn1)Cl)N)C(F)F        | C16158616 | -13.93 | -0.21 | -14.3  | 2.37  | -1.79 |
| 3128 | c1ccc2c(c1)nnn2[O-]           | C00058261 | -13.92 | -5.24 | -15.57 | 7.09  | -0.19 |
| 3129 | c1ccc(c(c1)C=O)O              | C00896073 | -13.92 | -2.97 | -15.14 | 5.27  | -1.08 |
| 3130 | COCCCN=C=S                    | C02164238 | -13.92 | -0.94 | -14.14 | 2.53  | -1.36 |
| 3131 | #Cc1ccc(cc1)CO                | C02548215 | -13.92 | 0.19  | -16.52 | 4.61  | -2.2  |
| 3132 | c1c(sc(n1)N)C=O               | C02577861 | -13.92 | -4.71 | -15.21 | 6.39  | -0.4  |
| 3133 | c1cc(c(c(c1C#N)F)F)F          | C04290229 | -13.92 | -2.42 | -17.32 | 9.6   | -3.77 |
| 3134 | CC1=CCC[C@H]1O                | C05179827 | -13.92 | -0.6  | -13.46 | 1.8   | -1.66 |
| 3135 | c1nnc(n1)CCl                  | C05522105 | -13.92 | -2.94 | -16.09 | 5.93  | -0.82 |
| 3136 | C=C[C@H](CBr)O                | C06129901 | -13.92 | -0.64 | -13.69 | 1.8   | -1.38 |
| 3137 | c1c(c([nH]c(=S)N1)[O-])C#N    | C12395137 | -13.92 | -3.07 | -17.09 | 4.98  | 1.26  |
| 3138 | [C@H](C(F)F)F)OC(F)F          | C14611408 | -13.92 | -0.09 | -13.94 | 1.88  | -1.77 |
| 3139 | c1c(cncc1N)C#N                | C21984988 | -13.92 | 0.25  | -19.04 | 5.63  | -0.76 |
| 3140 | c1c(c(cc(c1N)N)N)N            | C00391939 | -13.91 | -4.46 | -15.52 | 3.37  | 2.7   |
| 3141 | c1cc(c(cc1N)O)N               | C00394997 | -13.91 | -3.65 | -17.33 | 3.47  | 3.61  |
| 3142 | c1cc(c(cc1N)Cl)O              | C00396100 | -13.91 | -2.23 | -15.06 | 3.46  | -0.07 |
| 3143 | c1cc(ccc1CO)C#N               | C00403449 | -13.91 | -0.55 | -16.82 | 5.05  | -1.59 |
| 3144 | CCSC=C                        | C01581199 | -13.91 | -0.54 | -11.68 | 1.2   | -2.89 |
| 3145 | c1nc(c2c(n1)[nH]c(n2)Cl)N     | C01595876 | -13.91 | -3.05 | -14.29 | 4.86  | -1.44 |
| 3146 | c1cc(n(c1)O)C#N               | C01755382 | -13.91 | -3.23 | -15.29 | 5.66  | -1.05 |

|      |                               |           |        |       |        |       |       |
|------|-------------------------------|-----------|--------|-------|--------|-------|-------|
| 3147 | C=CCn1cnc(n1)[N+](=O)[O-]     | C02315323 | -13.91 | -2.94 | -14.56 | 9.54  | -5.94 |
| 3148 | C=CC(=O)OC(C(F)F)F(C(F)F)F    | C02564824 | -13.91 | -1.74 | -10.77 | 3.53  | -4.93 |
| 3149 | Cc1csc(n1)[S-]                | C02569756 | -13.91 | -1.16 | -14.34 | 3.39  | -1.79 |
| 3150 | Cc1nc(cs1)Br                  | C04198751 | -13.91 | -1.5  | -13.63 | 3.51  | -2.29 |
| 3151 | CN1C(=O)N=NC1=O               | C04529566 | -13.91 | -1.23 | -17.39 | 2.41  | 2.3   |
| 3152 | CSc1ccc(c(c1)F)Br             | C12471941 | -13.91 | -0.82 | -10.66 | 2.23  | -4.65 |
| 3153 | c1ccnc(c1)NO                  | C16954563 | -13.91 | -2.43 | -17.59 | 6.52  | -0.4  |
| 3154 | CCc1cc(n[nH]1)C(F)F           | C26547610 | -13.91 | -3.79 | -12.81 | 5.17  | -2.49 |
| 3155 | c1(c(c(c(c1F)F)F)F)F          | L2009A004 | -13.91 | 0.36  | -10.25 | 0.41  | -4.42 |
| 3156 | Cn1cccc1C=O                   | C00130187 | -13.9  | -3.01 | -13    | 4.86  | -2.77 |
| 3157 | CCC(=O)OC=C                   | C00391909 | -13.9  | -0.82 | -13.75 | 3.6   | -2.94 |
| 3158 | c1ccc(c(c1)C=N)O              | C00500289 | -13.9  | -3.25 | -14.52 | 4.15  | -0.29 |
| 3159 | C=CCn1ccc(=O)[nH]c1=O         | C01644934 | -13.9  | -2.11 | -21.48 | 9.53  | 0.16  |
| 3160 | CO/C=C/C=C                    | C01648514 | -13.9  | -1.59 | -12.3  | 2.16  | -2.16 |
| 3161 | C=CCNc1nc(ns1)N               | C02026821 | -13.9  | -2.55 | -14.27 | 4.84  | -1.91 |
| 3162 | C=CCn1cnc1[N+](=O)[O-]        | C02285055 | -13.9  | -3.08 | -13.21 | 8.56  | -6.16 |
| 3163 | c1(nc(sn1)Cl)Br               | C04241473 | -13.9  | -2.21 | -15.12 | 1.58  | 1.85  |
| 3164 | Cc1c(c(on1)N)[N+](=O)[O-]     | C04284533 | -13.9  | -4.82 | -12.96 | 4.15  | -0.28 |
| 3165 | C(=O)(C(F)F)FCl               | C04521880 | -13.9  | -0.08 | -12.98 | 0.84  | -1.68 |
| 3166 | C/C=C/Cl)SC#N                 | C05046667 | -13.9  | 1.1   | -15.89 | 3.9   | -3.02 |
| 3167 | c1cc(ncc1O)I                  | C14982916 | -13.9  | -1.1  | -15.8  | 3.67  | -0.67 |
| 3168 | C(=O)(C@H)(C(F)F)F(Cl)Br      | C16159140 | -13.9  | 0.52  | -12.18 | 0.54  | -2.77 |
| 3169 | c1c[nH]c2c1cc(nc2)N           | C18551745 | -13.9  | -5.44 | -12.91 | 5.65  | -1.21 |
| 3170 | Cn1c(ccc1[N+](=O)[O-])C(=O)Cl | C20248573 | -13.9  | -0.89 | -12.3  | 3.49  | -4.21 |
| 3171 | Cc1cc(cs1)CS                  | C20515421 | -13.9  | -0.91 | -11.26 | 2.16  | -3.9  |
| 3172 | c1(nc(c1)Br)C(F)F             | C21304395 | -13.9  | -1.6  | -12.9  | 2.53  | -1.94 |
| 3173 | c1cc(=O)cc1I                  | C21989745 | -13.9  | -0.81 | -15.95 | 6.39  | -3.53 |
| 3174 | CN1C(=O)C=CC1=O               | C01688138 | -13.89 | -2.5  | -16.44 | 5.95  | -0.89 |
| 3175 | Cc1c(=O)nc(c(=O)[nH]n1)C      | C01689048 | -13.89 | -3.03 | -15.52 | 4.67  | -0.01 |
| 3176 | C/C=C/C=CO                    | C02041062 | -13.89 | -2.12 | -13.12 | 2.53  | -1.18 |
| 3177 | CCc1[nH]cc([nH]1)C            | C04555707 | -13.89 | -1.75 | -14.74 | 5.1   | -2.5  |
| 3178 | CC(=O)n1cccn1                 | C05383527 | -13.89 | 0.58  | -17.78 | 5.02  | -1.72 |
| 3179 | c1(c(non1)Cl)C(=N)O)/N        | C05749057 | -13.89 | -2.71 | -16.16 | 4.08  | 0.91  |
| 3180 | c1cc2nncn2cc1Br               | C12471957 | -13.89 | -2.28 | -13.99 | 7.07  | -4.68 |
| 3181 | CNNC(=O)C(=O)n1ccnc1          | C13207718 | -13.89 | -3.84 | -14.69 | 4.94  | -3.63 |
| 3182 | Cc1cnc(c1)Br                  | C15021818 | -13.89 | -0.78 | -15.06 | 3.56  | -1.61 |
| 3183 | c1[nH]c(nc1)NC(=S)N           | C17328386 | -13.89 | -4.04 | -18.8  | 12.29 | -3.34 |
| 3184 | c1cc(c(c(c1)F)F)C#N           | C00409196 | -13.88 | -0.63 | -16.09 | 6.51  | -3.68 |
| 3185 | c1cc(c(c(c1)N)O)F             | C02243214 | -13.88 | -3.45 | -15.77 | 5.29  | 0.04  |
| 3186 | COc(=O)C(O)F                  | C04977188 | -13.88 | -3.21 | -13.99 | 4.07  | -0.76 |
| 3187 | CCOC(=O)n1cnc(n1)N            | C16980642 | -13.88 | -0.51 | -15.56 | 5.33  | -3.15 |
| 3188 | Cn1c(=O)ccc(n1)[O-]           | C17744645 | -13.88 | -2.96 | -17.32 | 6.43  | -0.04 |
| 3189 | Cc1c(cns1)C=O                 | C20443682 | -13.88 | -2.92 | -13.97 | 4.94  | -1.93 |
| 3190 | C1C(=CC(=O)O)Br               | C30677957 | -13.88 | -0.81 | -15.71 | 4.99  | -2.36 |
| 3191 | c1c(c(=O)[nH]nc1Cl)N          | C30678129 | -13.88 | -1.34 | -19.28 | 5.48  | 1.26  |
| 3192 | c1ccc2c(c1)nco2               | C00404297 | -13.87 | -2.27 | -16.66 | 5.98  | -0.91 |
| 3193 | COc1cc(c(cc1F)F)F             | C00405260 | -13.87 | -2.53 | -11.63 | 2.9   | -2.61 |
| 3194 | CN(C=C)OC                     | C01623512 | -13.87 | -0.89 | -13.19 | 2.04  | -1.84 |
| 3195 | c1cc(ncc1)F                   | C02384112 | -13.87 | -0.76 | -15.58 | 2.59  | -0.12 |
| 3196 | Cc1c(cno1)C(=O)Cl             | C02524899 | -13.87 | 1.46  | -15.9  | 3.01  | -2.45 |
| 3197 | C/C=C/C(F)F)F)O               | C02555216 | -13.87 | -3.78 | -13.09 | 3.34  | -0.34 |
| 3198 | c1cnc([nH]1)Cl                | C02577855 | -13.87 | -2.04 | -14.76 | 4.59  | -1.66 |
| 3199 | c1nnc(s1)Br                   | C04277253 | -13.87 | -0.65 | -17.04 | 4.79  | -0.97 |
| 3200 | CCSC/C(=[NH+])N)/N            | C05003077 | -13.87 | -3.66 | -12.94 | 3.4   | -0.67 |
| 3201 | CC/C=C/OCC=C                  | C17146901 | -13.87 | 0.1   | -12.17 | 1.66  | -3.46 |
| 3202 | c1ccc2c(c1)ncs2               | C00019726 | -13.86 | -2.38 | -13.68 | 5.11  | -2.91 |
| 3203 | c1ccc(cc1)NC(=O)NN            | C00157484 | -13.86 | -3.94 | -17.75 | 8.45  | -0.61 |
| 3204 | CCCc1ccc1                     | C01668229 | -13.86 | -0.92 | -13.49 | 2.33  | -1.78 |
| 3205 | c1c2c([nH]c(S)[nH]2)nc(n1)N   | C01693117 | -13.86 | -5.83 | -14.75 | 8.92  | -2.2  |
| 3206 | c1cc(c(cc1N)Br)F              | C02510756 | -13.86 | 0.23  | -14.99 | 3.23  | -2.32 |
| 3207 | C=CC[C@H](C=C)O               | C02568007 | -13.86 | -0.56 | -13.36 | 1.43  | -1.37 |
| 3208 | c1cnc(c1C=O)N                 | C02583497 | -13.86 | -5.9  | -14.14 | 6.41  | -0.23 |
| 3209 | CC/C(=C/C(=O)C(F)F)/[O-]      | C04262607 | -13.86 | -0.97 | -13.07 | 2.97  | -2.79 |
| 3210 | Cn1c(c(cn1)[N+](=O)[O-])N     | C04728771 | -13.86 | -4.9  | -14.25 | 6.85  | -1.56 |
| 3211 | c1cnncc1C#N                   | C12359491 | -13.86 | -0.17 | -17.97 | 5.73  | -1.44 |
| 3212 | c1cc(cc(c1)F)C(=N)O)/Cl       | C13367399 | -13.86 | -0.74 | -14.96 | 3.84  | -1.99 |
| 3213 | c1ccc(c(c1)F)SCC#N            | C19847576 | -13.86 | -0.3  | -16.65 | 7.75  | -4.67 |
| 3214 | CC(=O)c1nccs1                 | C00164484 | -13.85 | 0.9   | -17.44 | 4.35  | -1.66 |
| 3215 | COc(=O)Nc1ccsc1               | C00336546 | -13.85 | 0.56  | -18.02 | 5.01  | -1.39 |
| 3216 | c1(c(c(c(c1F)F)F)F)F)O        | C01583742 | -13.85 | -2.27 | -11.92 | 2.5   | -2.15 |
| 3217 | CC(=O)Oc1cccc1O               | C01688153 | -13.85 | 0.02  | -18.97 | 7.64  | -2.53 |
| 3218 | C=CC(=O)OC/C=C/Cl             | C01871135 | -13.85 | -0.37 | -13.6  | 3.79  | -3.68 |
| 3219 | c1(=O)c(ncc([nH]1)[O-])F      | C02272459 | -13.85 | -2.82 | -16.79 | 3.86  | 1.9   |
| 3220 | CCC(=C)C(=O)Cl                | C02541518 | -13.85 | -1.04 | -14.22 | 2.87  | -1.46 |
| 3221 | CCOC(=O)[C@H](C#C)O           | C02556928 | -13.85 | -4.03 | -12.71 | 4.41  | -1.52 |
| 3222 | C=CCNC(=O)C(C(F)F)F           | C03165303 | -13.85 | -0.99 | -14.94 | 3.96  | -1.89 |
| 3223 | c1cc(cnc1)NC(=O)C=N           | C05581138 | -13.85 | -4.15 | -21.35 | 10.75 | 0.92  |
| 3224 | CCO[C@H]1C=CCO1               | C05840128 | -13.85 | -0.09 | -13.97 | 2.85  | -2.64 |
| 3225 | c1c[nH]c(cc1=O)Cl             | C08672866 | -13.85 | -3.73 | -13.89 | 4.06  | -0.29 |
| 3226 | c1c(nc[nH]1)C(C(F)F)F)F       | C13230019 | -13.85 | -2.54 | -12.29 | 4.1   | -3.11 |
| 3227 | CCc1[nH]c(=O)ccn1             | C16998009 | -13.85 | -2.79 | -17.18 | 7.88  | -1.76 |
| 3228 | c1c(c(nc1F)F)Br               | C21990775 | -13.85 | 0.37  | -13.9  | 2.04  | -2.36 |
| 3229 | c1ccc2c(c1)NC(N2)S            | C22013613 | -13.85 | -2.48 | -13.71 | 3.78  | -1.44 |
| 3230 | c1cc(c(c(c1F)O)F)F            | C00389657 | -13.84 | -1.44 | -15.41 | 4.36  | -1.35 |
| 3231 | c1c[nH]c(nc1=O)NN             | C01188491 | -13.84 | -3.7  | -17.93 | 8.22  | -0.43 |
| 3232 | CCCC(=O)C(F)F)Cl              | C01675526 | -13.84 | -0.61 | -13.13 | 1.97  | -2.06 |
| 3233 | C1(=O)C(C(C(=O)N1)(F)F)F)F    | C01728889 | -13.84 | -0.04 | -17.18 | 3.15  | 0.23  |
| 3234 | c1nnc(n1)CCC#N                | C12505747 | -13.84 | -0.77 | -17.21 | 8.13  | -3.99 |
| 3235 | c1c(ccnc1[N+](=O)[O-])N       | C14982119 | -13.84 | -1.84 | -16.3  | 5.22  | -0.91 |
| 3236 | c1c(scn1)N                    | C16696910 | -13.84 | -3.55 | -14.23 | 3.79  | 0.15  |



|      |                               |           |        |       |        |       |       |
|------|-------------------------------|-----------|--------|-------|--------|-------|-------|
| 3327 | c1c(c[nH]1)C(=O)N             | C12398963 | -13.77 | -4.44 | -18.12 | 7.15  | 1.64  |
| 3328 | CN/C(=N)C1CCCC1/NN            | C17023479 | -13.77 | 2.06  | -18.33 | 5.65  | -3.15 |
| 3329 | c1c(c(nn1CC(F)F)N)Cl          | C20348912 | -13.77 | -4.5  | -12.81 | 5.4   | -1.86 |
| 3330 | c1nc(no1)C(=O)Cl              | C20357967 | -13.77 | -3.62 | -16.48 | 6.36  | -0.03 |
| 3331 | c1ccc(c(c1)CC(=O)Cl)F         | C02513824 | -13.76 | -1.76 | -12.66 | 4.84  | -4.18 |
| 3332 | c1c(c(ns1)C(=O)NN)N           | C04784130 | -13.76 | -4.08 | -17.38 | 5.26  | 2.45  |
| 3333 | c1ccc(c1N=[N+]=[N-])C=O       | C08383144 | -13.76 | 0.7   | -19.1  | 5.23  | -0.59 |
| 3334 | c1cc(c(=O)[nH]c1)[N+](=O)[O-] | C08698093 | -13.76 | -3.65 | -17.51 | 7.64  | -0.23 |
| 3335 | Cc1[nH]c(=O)c(cn1)Br          | C16082606 | -13.76 | -2.55 | -15.56 | 3.74  | 0.61  |
| 3336 | c1cc(nc(c1Cl)[O-])Cl          | C16123752 | -13.76 | -2.53 | -15.65 | 6.27  | -1.84 |
| 3337 | c1cc(c(c(c1)N)N)N             | C00087438 | -13.75 | -2.72 | -15.07 | 3.01  | 1.03  |
| 3338 | c1cc2c(nc1)COC2=O             | C00335085 | -13.75 | -2.4  | -15.85 | 6.86  | -2.36 |
| 3339 | c1cc(c(c(c1O)F)F)F            | C00389597 | -13.75 | -2.22 | -15.62 | 5.36  | -1.26 |
| 3340 | c1cc(c(cc1F)O)C=O             | C02510730 | -13.75 | -3.72 | -14.3  | 6.43  | -2.16 |
| 3341 | c1cc(c(nc1)F)CO               | C02598033 | -13.75 | -2.49 | -17.09 | 4.77  | 1.05  |
| 3342 | CCc1cc[nH]n1                  | C03593983 | -13.75 | -1.67 | -16.21 | 3.71  | 0.41  |
| 3343 | C=C(/C#N)Cl)Cl                | C12405131 | -13.75 | -1.28 | -12.63 | 2.74  | -2.59 |
| 3344 | c1cc(ccc1c2nc(no2)CCC[NH3+])F | C19682255 | -13.75 | 0.98  | -11.92 | -0.82 | -2    |
| 3345 | Cn1cc(cn1)S                   | C20476949 | -13.75 | -2.33 | -13.75 | 4.31  | -1.99 |
| 3346 | c1c(cnc(c1O)N)F               | C21981857 | -13.75 | -4.08 | -17.4  | 7     | 0.73  |
| 3347 | c1cncnc1NN                    | C25491315 | -13.75 | -1.85 | -16.92 | 6.07  | -1.04 |
| 3348 | c1cc(c(c(c1)F)O)F             | C00388530 | -13.74 | -2.33 | -14.52 | 4.38  | -1.27 |
| 3349 | Cc1c(non1)N                   | C01295959 | -13.74 | -2.83 | -14.84 | 4.18  | -0.25 |
| 3350 | CC(=O)C1CCCC1                 | C01700205 | -13.74 | -1.12 | -13.52 | 5.28  | -4.38 |
| 3351 | COO(=O)C1CCCC1F               | C02570115 | -13.74 | -0.41 | -16.67 | 5.87  | -2.54 |
| 3352 | c1ccc(c(c1)CSC(=[NH2+])N)F    | C04377625 | -13.74 | -0.47 | -14.72 | 4.08  | -2.64 |
| 3353 | c1(nc(on1)C(F)F)C(=NO)/N      | C05510674 | -13.74 | -2.2  | -15.98 | 3.52  | 0.92  |
| 3354 | CCCc1nc(on1)CCl               | C12505493 | -13.74 | 0.49  | -15.98 | 4.13  | -2.38 |
| 3355 | c1cc(ccc1N)N=[N+]=[N-]        | C12956370 | -13.74 | -0.61 | -15.91 | 2.78  | 0     |
| 3356 | c1cncnc1NC(=O)N               | C13538948 | -13.74 | -3.52 | -19.12 | 7.95  | 0.94  |
| 3357 | C=C=CCCCO                     | C15809780 | -13.74 | -0.98 | -14.33 | 2.79  | -1.22 |
| 3358 | CSc1ccccc1                    | C15880094 | -13.74 | 0.44  | -14.45 | 3.25  | -2.98 |
| 3359 | c1cncnc1CN[NH3+]              | C19169056 | -13.74 | 1.51  | -18.59 | 3.3   | 0.04  |
| 3360 | CCCCN/C(=N)[N+](=O)[O-]/N     | C19943825 | -13.74 | -4.65 | -10.22 | 3.51  | -2.38 |
| 3361 | Cc1coanc1C=O                  | C20443655 | -13.74 | -2.05 | -14.89 | 4.83  | -1.63 |
| 3362 | Cc1nc(sn1)C=O                 | C20443854 | -13.74 | -4.06 | -13.25 | 4.41  | -0.83 |
| 3363 | CNc1ncc(cn1)C#N               | C21953250 | -13.74 | -1.69 | -14.53 | 5.35  | -2.86 |
| 3364 | Cc1c(c(no1)N)Cl               | C22129881 | -13.74 | -2.36 | -14.11 | 4.25  | -1.51 |
| 3365 | c1c2nncn2c3nncn3n1            | C26471499 | -13.74 | -1.65 | -14.81 | 8.68  | -5.96 |
| 3366 | CN1CC(=O)N=C1N                | C00967189 | -13.73 | -2.82 | -15.28 | 5.5   | -1.13 |
| 3367 | C=CC(=O)Cl                    | C01609475 | -13.73 | -1.63 | -13.55 | 3.21  | 1.75  |
| 3368 | Cc1c(ccc(n1)F)N               | C02383956 | -13.73 | -4.36 | -15.2  | 5.33  | 0.5   |
| 3369 | C(=N/N=C(N)S)C(F)F            | C05409951 | -13.73 | -1.9  | -14.89 | 3.79  | -0.74 |
| 3370 | c1cc(c(=O)[nH]c1)C(F)F        | C08698400 | -13.73 | -3.01 | -16    | 5.1   | 0.17  |
| 3371 | Cn1cc(cn1)CCl                 | C12398537 | -13.73 | -0.99 | -14.95 | 4.82  | -2.61 |
| 3372 | c1cn(cn1)C=O                  | C14516302 | -13.73 | -3.3  | -15.72 | 7.45  | -2.17 |
| 3373 | C(=C/N)C(=O)C(F)F             | C16158775 | -13.73 | -3.49 | -15.19 | 5.81  | -0.86 |
| 3374 | c1c(c(nc(n1)Cl)[O-])F         | C17004699 | -13.73 | -1.8  | -17.01 | 3.94  | 1.13  |
| 3375 | Cc1[nH]cc(c(=O)n1)C#N         | C17378342 | -13.73 | -2.44 | -17.39 | 5.32  | 0.78  |
| 3376 | C/C(=C(C(=O)C(F)F)Cl)/[O-]    | C18167146 | -13.73 | 1.12  | -14.85 | 2.26  | -2.26 |
| 3377 | c1nc2n(n1)CCCN2               | C20216425 | -13.73 | -3.4  | -14.45 | 7.42  | -3.31 |
| 3378 | c1cc(ncc1[N+](=O)[O-])C=O     | C21985566 | -13.73 | -5.33 | -10.91 | 4.8   | -2.28 |
| 3379 | CN1C(=O)C=CC1(F)F             | C21997047 | -13.73 | -2.54 | -15.91 | 6.07  | -1.35 |
| 3380 | c1cc(c(cc1S)O)O               | C26479313 | -13.73 | -2.32 | -16.64 | 5.06  | 0.17  |
| 3381 | Cc1nc(cs1)CS                  | C31890180 | -13.73 | -0.9  | -14.08 | 3.8   | -2.54 |
| 3382 | CC(=O)c1ccc1                  | C00334128 | -13.72 | -2.16 | -16.4  | 7.18  | -2.33 |
| 3383 | c1ccc(c(c1)CCO)N              | C00406951 | -13.72 | -2.09 | -13.94 | 2.83  | -0.53 |
| 3384 | c1c(c(c(nn1)Cl)Cl)N           | C00967451 | -13.72 | -4.04 | -14.44 | 5.16  | -0.4  |
| 3385 | Cn1c(cn1)N                    | C01390247 | -13.72 | -2.53 | -15.27 | 4.88  | -0.8  |
| 3386 | c1cc(ccc1C=O)N                | C01677280 | -13.72 | -3.41 | -14.46 | 5.68  | -1.52 |
| 3387 | c1cnc([nH]1)N[N+](=O)[O-]     | C01742154 | -13.72 | -4.33 | -15.45 | 8.82  | -2.77 |
| 3388 | C/C=C/c1ccc1O                 | C02140904 | -13.72 | 0.1   | -16.71 | 3.03  | -0.14 |
| 3389 | CC(=C)[C@@H](CC=C)O           | C02169052 | -13.72 | -1.15 | -13.97 | 1.62  | -0.21 |
| 3390 | c1c(c(cn1)[O-])C#N            | C02382604 | -13.72 | -0.67 | -18.55 | 4.91  | 0.59  |
| 3391 | c1cnc(cn1)F                   | C02506842 | -13.72 | -2.07 | -15.06 | 4.09  | -0.68 |
| 3392 | c1c(c(c(nc1F)F)C(F)F)F        | C02513199 | -13.72 | 1.48  | -14.1  | 2.24  | -3.34 |
| 3393 | c1ccc(c(c1)NC(=O)C=N)O        | C04900984 | -13.72 | -3.71 | -20.03 | 9.34  | 0.69  |
| 3394 | CC/C=N/C                      | C04946289 | -13.72 | -0.92 | -13.82 | 2.42  | -1.4  |
| 3395 | C=CCC(=O)c1ccc1               | C05283033 | -13.72 | 0.95  | -17.24 | 4.65  | -2.08 |
| 3396 | Cc1c(nc(n1)C)O                | C05401452 | -13.72 | -3.76 | -13.56 | 5.44  | -1.83 |
| 3397 | C(CSC(=C(F)F)F)O              | C08983558 | -13.72 | -2.46 | -12.99 | 2.29  | -0.56 |
| 3398 | Cc1c([nH]c(S)[nH]1)C          | C15892418 | -13.72 | -2.66 | -13.76 | 4.68  | -1.98 |
| 3399 | [C@@]1(C(O1)F)F(C(F)F)Br      | C16082668 | -13.72 | -0.03 | -12.57 | 0.35  | -1.48 |
| 3400 | c1cnc(c1)CO                   | C00158585 | -13.71 | -0.31 | -17.36 | 4.11  | -0.15 |
| 3401 | c1ccc(cc1)N(C=S)O             | C01582369 | -13.71 | -1.61 | -17.62 | 4.81  | 0.71  |
| 3402 | CCOC(=O)C=C(C=O)C             | C02144785 | -13.71 | -0.62 | -14.67 | 4.87  | -3.3  |
| 3403 | c1c2c(c(ncn2)[O-])[nH]n1      | C11592630 | -13.71 | -2.46 | -18.83 | 5.45  | 2.12  |
| 3404 | Cc1cc(no1)C#N                 | C12370156 | -13.71 | -0.9  | -15.24 | 4.84  | -2.41 |
| 3405 | c1cnc(c1)CC(F)F               | C12395930 | -13.71 | 0.52  | -17.35 | 5.76  | -2.63 |
| 3406 | c1c(c(cc(c1F)F)O)C=O          | C16158091 | -13.71 | -4.6  | -14.03 | 6.1   | -1.19 |
| 3407 | CCc1[nH]c(cn1)Cl              | C20358066 | -13.71 | -4.41 | -13.32 | 6.52  | -2.51 |
| 3408 | CCNc1nccc1                    | C21013773 | -13.71 | -1.3  | -13.88 | 4.59  | -3.11 |
| 3409 | c1c(=O)n(c2nncn2n1)N          | C26443341 | -13.71 | -3.9  | -15.2  | 7.93  | -2.55 |
| 3410 | c1c(cn1)C(F)F                 | C26510661 | -13.71 | -2.82 | -15.46 | 4.85  | -0.28 |
| 3411 | c1cc(c2nccn2c1)F              | C26894738 | -13.71 | -2.65 | -16.03 | 8.86  | -3.9  |
| 3412 | Cc1c(cccc1O)O                 | C00154621 | -13.7  | -1.71 | -16.03 | 3.76  | 0.27  |
| 3413 | C(#N)c1c(c(nc(c1F)F)F)F       | C00389641 | -13.7  | 0.54  | -14.01 | 1.91  | -2.15 |
| 3414 | Cc1c(non1)C(=O)N              | C01273612 | -13.7  | -2.16 | -15.9  | 3.39  | 0.98  |
| 3415 | c1ccc(cc1)SC(=O)NN            | C01704240 | -13.7  | -0.26 | -18.41 | 6.17  | -1.2  |
| 3416 | CC1=CC(=O)CC1                 | C02035915 | -13.7  | -1.57 | -14.57 | 5.28  | -2.83 |

|      |                                     |           |        |       |        |       |       |
|------|-------------------------------------|-----------|--------|-------|--------|-------|-------|
| 3417 | C/C=C(C)/C(=O)C                     | C02036684 | -13.7  | -0.52 | -13.51 | 3.41  | -3.07 |
| 3418 | c1csc1N                             | C02510647 | -13.7  | -2.53 | -14.3  | 2.09  | 1.03  |
| 3419 | c1cc(c(cc1Cl)F)C#N                  | C02512515 | -13.7  | -1.37 | -14.06 | 4.08  | -2.36 |
| 3420 | c1c(ncs1)C(=S)N                     | C02527456 | -13.7  | -3.27 | -17.29 | 7.57  | -0.71 |
| 3421 | CCOC(=O)C(CO)(F)F                   | C02559538 | -13.7  | -1.43 | -16.03 | 4.48  | -0.72 |
| 3422 | CCOC(=O)CS                          | C03860449 | -13.7  | -1.3  | -14.04 | 4.08  | -2.44 |
| 3423 | c1cc2c(cc1N)[nH]cn2                 | C04692941 | -13.7  | -5.68 | -13.61 | 7.22  | -1.63 |
| 3424 | Cc1c2c(ncn1)[nH]n2                  | C05544348 | -13.7  | -1.03 | -17.78 | 6.36  | -1.26 |
| 3425 | C1[C@@H](OC1)CN=C=O                 | C11802365 | -13.7  | -0.95 | -16.84 | 3.61  | 0.48  |
| 3426 | c1cc([nH]c1C(=O)N)Br                | C13379819 | -13.7  | -2.81 | -16.39 | 5.32  | 0.19  |
| 3427 | C1=CN=C[C@@H](C1=O)[O-]             | C13521874 | -13.7  | -3.18 | -16.68 | 4.43  | 1.72  |
| 3428 | c1c(nc(s1)[N+](=O)[O-])[N+](=O)[O-] | C15784321 | -13.7  | -2.63 | -18.01 | 10.97 | -4.03 |
| 3429 | C[NH+](Cc1ccccc1)N                  | C19167200 | -13.7  | -2.2  | -11.3  | 1.81  | -2    |
| 3430 | Cc1c(nns1)C=O                       | C20443830 | -13.7  | -3.12 | -13.98 | 4.34  | -0.93 |
| 3431 | c1c(cnc(c1Cl)[N+](=O)[O-])Cl        | C26459716 | -13.7  | -2.35 | -12.23 | 4.93  | -4.04 |
| 3432 | CC(=O)CSc1ccccc1N                   | C32698055 | -13.7  | -2.65 | -14.65 | 6.83  | -3.24 |
| 3433 | CCCOCC(=O)Cl                        | C01586736 | -13.69 | -0.86 | -12.96 | 1.71  | -1.57 |
| 3434 | c1cn(c(=O)[nH]c1=O)CC=O             | C01701740 | -13.69 | -2.8  | -20.85 | 9.45  | 0.51  |
| 3435 | c1(c(c(c(c1F)F)F)N)F)N              | C01704671 | -13.69 | -3.43 | -12.62 | 2.71  | -0.36 |
| 3436 | c1cc(cc(c1F)NC(=O)N                 | C02031132 | -13.69 | -4.16 | -17.78 | 8.78  | -0.53 |
| 3437 | c1cc(c(c1O)OC(F)F                   | C02560137 | -13.69 | 0.47  | -18.76 | 4.82  | -0.21 |
| 3438 | Cc1ccc(c(c1F)O)F                    | C02574955 | -13.69 | -2.07 | -15.25 | 4.36  | -0.72 |
| 3439 | COC(=O)C=C(F)F                      | C03880140 | -13.69 | -0.48 | -14.58 | 3.54  | -2.17 |
| 3440 | C1C=C[C@H](C@H)1N=O)Cl              | C05004376 | -13.69 | -1.26 | -12.37 | 1.55  | -1.61 |
| 3441 | CC(=NOCC#C)C                        | C05377860 | -13.69 | -0.03 | -15.88 | 4.64  | -2.42 |
| 3442 | c1c(c(nc1Cl)Cl)[O-]                 | C05425248 | -13.69 | -4.48 | -15.59 | 5.32  | 1.05  |
| 3443 | COC(=O)Cc1[nH]c(n1)[N+](=O)[O-]     | C05510987 | -13.69 | -4.67 | -16.85 | 12.44 | -4.61 |
| 3444 | Cc1c[nH+]c[nH]1                     | C08283845 | -13.69 | -2.9  | -14.06 | 5.29  | -2.01 |
| 3445 | Cc1nc(on1)CCl                       | C12463251 | -13.69 | -1.47 | -15.73 | 4.55  | -1.03 |
| 3446 | C=CC/C(=N/O)/N                      | C15937655 | -13.69 | -3.58 | -14.51 | 4.07  | 0.33  |
| 3447 | CCOC1ccc(n1)N                       | C16677890 | -13.69 | -3.22 | -16.57 | 5.98  | 0.12  |
| 3448 | c1(nc(s1)S(=O)(=O)[NH-])N           | C16969869 | -13.69 | -5.01 | -19.28 | 6.76  | 3.84  |
| 3449 | c1c2c(nc(n1)[O-])snn2               | C17328366 | -13.69 | -2.21 | -19.78 | 4.89  | 3.42  |
| 3450 | Cc1csc(n1)/C(=N/O)/C#N              | C17837217 | -13.69 | -0.26 | -19.66 | 6.56  | -0.34 |
| 3451 | Cc1c([nH]c1N)C(F)F                  | C26511518 | -13.69 | -4.09 | -15.5  | 6.82  | -0.92 |
| 3452 | c1ccc2c(c1)c(=O)c2=O                | C00158295 | -13.68 | -2.32 | -13.75 | 5.47  | -3.1  |
| 3453 | CS1ccc(cc1)Cl                       | C00161046 | -13.68 | -0.17 | -14.88 | 1.91  | -0.54 |
| 3454 | COC(=O)Nn1cnc1                      | C01437193 | -13.68 | -1.66 | -18.62 | 8.43  | -1.84 |
| 3455 | c1ncc(n1)CCO                        | C01442884 | -13.68 | -2.6  | -17.7  | 4.46  | 2.17  |
| 3456 | CCO/C=C/Br                          | C01613352 | -13.68 | -1.11 | -11.71 | 1.57  | -2.42 |
| 3457 | C[C@H](C(=O)Cl)Cl                   | C02242618 | -13.68 | -0.37 | -13.21 | 2.22  | -2.33 |
| 3458 | COC(=O)C(=C)F                       | C02525784 | -13.68 | -1.27 | -13.88 | 3.53  | -2.06 |
| 3459 | CC#CCOC(=O)C                        | C02555299 | -13.68 | 0.9   | -15.96 | 4.92  | -3.54 |
| 3460 | c1cc(cc(c1)OC(=S)Cl)[N+](=O)[O-]    | C02576025 | -13.68 | -3.19 | -11.79 | 6.01  | -4.72 |
| 3461 | CC(=O)N/[NH+]=C/c1c(ncn1)N)N        | C04837426 | -13.68 | -3.03 | -21.68 | 8.81  | 2.22  |
| 3462 | c1(c([n+](on1)[O-])N)C(=O)N         | C05002537 | -13.68 | -5.21 | -18.39 | 8.83  | 1.1   |
| 3463 | c1cn(cn1)C(=O)CCl                   | C05729244 | -13.68 | -3.04 | -15.17 | 7.64  | -3.11 |
| 3464 | CCN1C(=O)C(=O)NC1=O                 | C06496934 | -13.68 | -1.1  | -18.36 | 4.63  | 1.14  |
| 3465 | Cc1ccc(nc1)NN                       | C06755403 | -13.68 | -3.73 | -12.76 | 4.19  | -1.39 |
| 3466 | c1cc(=O)[nH]cc1[N+](=O)[O-]         | C08580643 | -13.68 | -2.39 | -17.52 | 5.67  | 0.56  |
| 3467 | [C@@H](C(F)F)Br)OC(F)F)F            | C08698311 | -13.68 | -0.25 | -12.88 | 1.49  | -2.05 |
| 3468 | C(=O)c1c(snn1)Cl                    | C15021036 | -13.68 | 0.46  | -16.01 | 2.76  | -0.89 |
| 3469 | COC(=O)/C=C/N                       | C21297651 | -13.68 | -3.15 | -15.39 | 5.38  | -0.53 |
| 3470 | c1c(c(ncn1)N)C=O                    | C26894937 | -13.68 | -5.01 | -15.87 | 8.02  | -0.82 |
| 3471 | c1cc(cc(c1)F)CC#N                   | C00157125 | -13.67 | -1.51 | -17.54 | 8.59  | -3.22 |
| 3472 | CC(=O)c1cccs1                       | C00157402 | -13.67 | 1.41  | -16.67 | 4.64  | -3.05 |
| 3473 | C=COCC(=O)c1ccccc1O                 | C00394054 | -13.67 | -0.16 | -17.83 | 5.87  | -1.55 |
| 3474 | C[C@@H](c1ccccc1)O                  | C01403557 | -13.67 | -1.36 | -15.21 | 3.45  | -0.55 |
| 3475 | CCOC1cnc1                           | C01574034 | -13.67 | -0.7  | -16.74 | 4.06  | -0.3  |
| 3476 | c1cnc(nc1F)F                        | C01575075 | -13.67 | -2.25 | -15.31 | 5.32  | -1.42 |
| 3477 | c1c[nH]cc1CCO                       | C01728760 | -13.67 | -3.76 | -15.55 | 3.98  | 1.66  |
| 3478 | CCOC(=O)COC(=O)C                    | C01736012 | -13.67 | 1.01  | -17.12 | 5.83  | -3.39 |
| 3479 | c1cc(c(cc1N)F)C(F)F                 | C02556414 | -13.67 | -2.1  | -13.27 | 4.09  | -2.4  |
| 3480 | Cc1c(=O)nc(c(=S)[nH]n1)N            | C02581674 | -13.67 | -4.84 | -14.27 | 5.63  | -0.19 |
| 3481 | Cc1cc(sn1)N                         | C04240488 | -13.67 | -2.73 | -14.63 | 4.19  | -0.49 |
| 3482 | [H]N=C(CC)/SC                       | C04353471 | -13.67 | -0.92 | -12.19 | 1.35  | -1.9  |
| 3483 | C=Cn1ccc1C=O                        | C05377628 | -13.67 | 0.31  | -17.47 | 5.62  | -2.13 |
| 3484 | c1ccn2cc(nc2c1)S                    | C13207463 | -13.67 | -1.95 | -14.97 | 7.04  | -3.79 |
| 3485 | c1cc(cnc1)CNC(=O)C(F)F              | C13208170 | -13.67 | 0.45  | -20.41 | 7.8   | -1.51 |
| 3486 | Cc1cn(cn1)C                         | C13282287 | -13.67 | -2.07 | -13.67 | 5.37  | -3.31 |
| 3487 | Cc1c(c(sn1)N)Br                     | C15042090 | -13.67 | -3.52 | -12.46 | 3.2   | -0.89 |
| 3488 | C=CCOC1cnc1                         | C15894714 | -13.67 | -2.26 | -12.17 | 3.38  | -2.62 |
| 3489 | [C@H](C(=O)Cl)(F)Cl                 | C16159204 | -13.67 | 0.21  | -14.13 | 2.15  | -1.9  |
| 3490 | C(c1c(=O)[nH]c(=O)[nH]n1)F          | C17379051 | -13.67 | -3.88 | -17.15 | 6.12  | 1.25  |
| 3491 | COCc1ccc(nc1)Cl                     | C19385596 | -13.67 | -2.23 | -13.19 | 3.92  | -2.17 |
| 3492 | Cc1n2cnc2s1                         | C33359219 | -13.67 | -1.21 | -15.35 | 6.68  | -3.78 |
| 3493 | COC(=O)Cc1ccccc1O                   | C00397535 | -13.66 | -0.02 | -18.13 | 6.93  | -2.44 |
| 3494 | c1cnc(c1)N                          | C01737540 | -13.66 | -3.15 | -15.89 | 6.12  | -0.75 |
| 3495 | c1ccc(c(c1)C(=O)Cl)F                | C02022413 | -13.66 | 1.23  | -16.83 | 5.59  | -3.66 |
| 3496 | C[C@H](C(=O)C)Cl                    | C02038108 | -13.66 | -0.66 | -13.17 | 2.58  | -2.41 |
| 3497 | C[C@@H](C(=O)Cl)Br                  | C02043872 | -13.66 | 1.24  | -14.57 | 2.07  | -2.4  |
| 3498 | c1cc(ccc1CCO)N                      | C04013051 | -13.66 | -2.19 | -14.19 | 3.09  | -0.38 |
| 3499 | Cc1c[nH]c(n1)Br                     | C04352759 | -13.66 | -2.06 | -14.33 | 4.7   | -1.97 |
| 3500 | C(C(=O)Cl)I                         | C05226702 | -13.66 | 0.25  | -14.3  | 2.66  | -2.27 |
| 3501 | C1CCC(=CC1)CO                       | C05409961 | -13.66 | -1.68 | -12.81 | 2.37  | -1.55 |
| 3502 | C1C[C@H](CC=C1)C(=O)Cl              | C08100892 | -13.66 | -0.03 | -11.87 | 1.97  | -3.74 |
| 3503 | C1C(=CC(=O)O)I                      | C15444545 | -13.66 | -0.82 | -14.87 | 4.73  | -2.7  |
| 3504 | C/C(=C/C(=O)C)/N                    | C16001389 | -13.66 | -3.03 | -14.02 | 4.5   | -1.11 |
| 3505 | CCOC(=O)C=CCBr                      | C17353063 | -13.66 | -0.97 | -11.85 | 3.02  | -3.86 |
| 3506 | C1=C/C(=C/C(=O)N/C=C1               | C19729367 | -13.66 | -1.26 | -16.64 | 6.72  | -2.47 |

|      |                                 |           |        |       |        |      |       |
|------|---------------------------------|-----------|--------|-------|--------|------|-------|
| 3507 | c1cc(c(cc1N)O)Br                | C19872881 | -13.66 | -2.43 | -17.71 | 6.59 | -0.1  |
| 3508 | c1ccc(cc1)COC(=O)NO             | C00389485 | -13.65 | -0.62 | -20.61 | 8.36 | -0.78 |
| 3509 | c1cc(ccc1O)Br                   | C00404316 | -13.65 | -0.56 | -16.72 | 2.44 | 1.19  |
| 3510 | c1ccc2c(c1)CC(C@H)2O            | C00901097 | -13.65 | -1.58 | -12.77 | 3    | -2.3  |
| 3511 | COC(=O)c1c(c[nH]n1)[N+](=O)[O-] | C01075965 | -13.65 | -3.06 | -16.21 | 7.52 | -1.89 |
| 3512 | C(=C)SC#N)C(=O)N                | C01604241 | -13.65 | -2.67 | -19.47 | 8.25 | 0.24  |
| 3513 | C1C[C@H]2C(=C1)CC(=O)O2         | C01616151 | -13.65 | -1.21 | -14.39 | 5.22 | -3.28 |
| 3514 | CCCc1cc[nH]n1                   | C03636498 | -13.65 | -1.83 | -12.75 | 3.3  | -2.37 |
| 3515 | CC(=O)CC(=O)c1ccccc1            | C04262604 | -13.65 | -0.64 | -17.1  | 5.31 | -1.21 |
| 3516 | c1c(n[nH]n1)CN=[N+]=[N-]        | C05544994 | -13.65 | -2.44 | -18.26 | 4.74 | 2.31  |
| 3517 | c1ccc(c(c1)c2nc[nH]n2)N         | C06896574 | -13.65 | -0.63 | -19.28 | 9.16 | -2.89 |
| 3518 | c1cc(oc1C=O)c2cncnc2            | C20216282 | -13.65 | -0.17 | -16.27 | 5.91 | -3.12 |
| 3519 | C(COC(=O)CS)O                   | C20231604 | -13.65 | -3.64 | -16.52 | 6.5  | 0.02  |
| 3520 | c1csc(c1N)C(=O)NN               | C00080615 | -13.64 | -4.87 | -16.72 | 6.63 | 1.31  |
| 3521 | COC1cc(=O)[nH]nc1               | C00337136 | -13.64 | -2.96 | -17.41 | 6.24 | 0.5   |
| 3522 | CCOC(=O)CCBr                    | C01583936 | -13.64 | -0.03 | -12.95 | 2.87 | -3.53 |
| 3523 | Cc1ncc(cn1)Cl                   | C01644846 | -13.64 | -0.79 | -15.51 | 2.5  | 0.16  |
| 3524 | CC(=O)OCCSC#N                   | C01661159 | -13.64 | -1.27 | -15.14 | 5.79 | -3.02 |
| 3525 | c1c(ncnc1Cl)Cl                  | C01670096 | -13.64 | 0.07  | -13.41 | 2.23 | -2.53 |
| 3526 | c1c(c(c2nncn2n1)N)Cl            | C01674219 | -13.64 | -5.02 | -14.56 | 5.8  | 0.15  |
| 3527 | CC(=O)NCC(=O)c1c(non1)N         | C02227534 | -13.64 | -3.32 | -19.49 | 6.52 | 2.65  |
| 3528 | CCOC(=O)[C@H]2C(=O)C            | C03848375 | -13.64 | -2.45 | -13.27 | 4.78 | -2.7  |
| 3529 | C=CCN(CC=C)N=O                  | C04783263 | -13.64 | -1.08 | -14.13 | 3.21 | -1.65 |
| 3530 | c1ccc(cc1)/C=C/C=N/O            | C12370145 | -13.64 | -2.71 | -15.45 | 4.48 | 0.03  |
| 3531 | Cn1nc(nn1)N                     | C16954943 | -13.64 | -4.74 | -15.24 | 7.17 | -0.83 |
| 3532 | C=C/C=C=N/Nc1ccccc1             | C17324211 | -13.64 | -1.13 | -12.56 | 4.11 | -4.05 |
| 3533 | CSCSC                           | C01621620 | -13.63 | -1.11 | -11.08 | 1.38 | -2.83 |
| 3534 | c1ccc(cc1)/C=C\2/C(=O)OC=N2     | C01707320 | -13.63 | -0.6  | -16.47 | 7.27 | -3.83 |
| 3535 | C=C1CCC(=O)O1                   | C02015886 | -13.63 | -1.01 | -15.51 | 5.72 | -2.83 |
| 3536 | Cc1ccc(s1)Cl                    | C02382622 | -13.63 | -0.29 | -14.57 | 1.58 | -0.34 |
| 3537 | c1c(c(c(c1F)Br)F)O              | C02541323 | -13.63 | 0.44  | -16.9  | 2.72 | 0.12  |
| 3538 | c1cc2c(cc1N)COC2                | C02559710 | -13.63 | -1.75 | -13.97 | 3.23 | -1.14 |
| 3539 | CCOC(=C)C                       | C02563426 | -13.63 | -0.29 | -13.46 | 1.54 | -1.43 |
| 3540 | COC(=O)[C@H]2C(=O)C(=O)OC2O     | C04099934 | -13.63 | 1.9   | -20.11 | 5.8  | -1.22 |
| 3541 | c1cc(ncc1Br)C=O                 | C04208988 | -13.63 | -0.83 | -13.7  | 3.09 | -2.2  |
| 3542 | CN(C(=O)NCC(F)F)N=O             | C04804439 | -13.63 | -1.73 | -14.23 | 3.12 | -0.8  |
| 3543 | C1CC=CC(=O)C1                   | C05188148 | -13.63 | -1.95 | -14.52 | 4.21 | -1.38 |
| 3544 | c1c(ncnc1Cl)NN                  | C08615712 | -13.63 | -2.4  | -14.46 | 4.42 | -1.19 |
| 3545 | c1cc(ccc1)/C=C/C(=O)C(F)F/[O-]F | C18161714 | -13.63 | -2.96 | -10.03 | 4.35 | -4.98 |
| 3546 | c1ccnc(c1)[C@H]2CO2             | C19730640 | -13.63 | -2.42 | -13.96 | 4.08 | -1.33 |
| 3547 | Cn1ccnc1F                       | C22001040 | -13.63 | -2.08 | -14.88 | 5.67 | -2.34 |
| 3548 | c1ncc(c1Cl)O                    | C02583363 | -13.62 | -1.12 | -17.26 | 3.44 | 1.32  |
| 3549 | CN(C=C)N=O                      | C04984176 | -13.62 | -1.63 | -13.96 | 3.28 | -1.32 |
| 3550 | CCOC1ccccc1                     | C05114909 | -13.62 | -2.62 | -12.13 | 3.33 | -2.19 |
| 3551 | Cc1cc(cnc1)C#N                  | C08294945 | -13.62 | 0.25  | -15.06 | 4.05 | -2.86 |
| 3552 | c1cc(ncc1Cl)C=O                 | C08698212 | -13.62 | -0.85 | -15.55 | 3.14 | -0.36 |
| 3553 | c1cc(c(c1)Br)F)O                | C16158469 | -13.62 | -1.46 | -14.73 | 4.31 | -1.74 |
| 3554 | COC(=O)c1c[nH]nc1               | C19722105 | -13.62 | -2.01 | -17.2  | 6.86 | -1.27 |
| 3555 | C=C[C@H]1C(=C)CCCO1             | C21990741 | -13.62 | 0.58  | -12.84 | 1.8  | -3.16 |
| 3556 | c1cc(c(cc1O)F)C#N               | C00161696 | -13.61 | 0.12  | -18.1  | 5.81 | -1.44 |
| 3557 | CCOC1ccccc1N                    | C00331030 | -13.61 | -2.04 | -14.61 | 3.64 | -0.6  |
| 3558 | Cc1c(s)[nH]c(=O)[nH]n1          | C01237630 | -13.61 | -2.58 | -15.52 | 4.59 | -0.1  |
| 3559 | c1nc(c(c2n1nnn2)N)Cl            | C01599810 | -13.61 | -4.15 | -14.28 | 4.6  | 0.22  |
| 3560 | CCOC(=O)[C@H](F)Cl              | C02168353 | -13.61 | -1.31 | -12.87 | 3.43 | -2.86 |
| 3561 | c1cc(cnc1)CNc2[nH]ncn2          | C03954464 | -13.61 | -0.7  | -15.4  | 6.37 | -3.88 |
| 3562 | CCOC(=O)[C@H](C)S               | C04802714 | -13.61 | -1.2  | -12.53 | 3.11 | -2.99 |
| 3563 | c1ccc(c(c1)C(=[NH2+])NO)F       | C06251708 | -13.61 | -3.44 | -18.04 | 7.03 | 0.84  |
| 3564 | c1c[nH]nc1C(=O)N                | C14684055 | -13.61 | -4.44 | -18.44 | 7.69 | 1.58  |
| 3565 | C(=C)C#N)C=C/C#N                | C16927505 | -13.61 | -1.5  | -15.43 | 6.36 | -3.05 |
| 3566 | Cc1c(scc1C)Cl                   | C19754919 | -13.61 | -1.05 | -10.21 | 2.25 | -4.61 |
| 3567 | C1CCC(C1)NCC#N                  | C20037012 | -13.61 | -1.61 | -14.14 | 4.26 | -2.12 |
| 3568 | c1cnc(cn1)CNC=O                 | C01601709 | -13.6  | -3.26 | -19.49 | 7.59 | 1.55  |
| 3569 | C#CCNC(=O)NCCCl                 | C01673738 | -13.6  | -1.74 | -17.25 | 6.51 | -1.11 |
| 3570 | c1ccnc(c1)c2csnn2               | C03844531 | -13.6  | -2.88 | -14    | 5.46 | -2.17 |
| 3571 | c1cnc(c1)F                      | C04352657 | -13.6  | 0.39  | -16.21 | 2.35 | -0.13 |
| 3572 | c1[nH]c(c(n1)[N+](=O)[O-])Cl    | C06645761 | -13.6  | -2.53 | -15.61 | 7.69 | -3.15 |
| 3573 | Cc1c(=O)nc([nH]n1)N             | C09171147 | -13.6  | -4.01 | -17.33 | 5.98 | 1.77  |
| 3574 | C1C=CC(=C1)C=O                  | C12358630 | -13.6  | -1.5  | -15.82 | 6.46 | -2.73 |
| 3575 | Cc1c(nno1)C(=O)Cl               | C16124705 | -13.6  | 1.05  | -16.67 | 3.35 | -1.33 |
| 3576 | c1c(cnc2c1[nH]cn2)N             | C18544363 | -13.6  | -4.81 | -15.89 | 8.22 | -1.12 |
| 3577 | c1c(cn1)C(F)F)Br                | C26510703 | -13.6  | -0.93 | -14.76 | 4.24 | -2.14 |
| 3578 | c1cc(ccc1NC(=S)N)F              | C00064840 | -13.59 | -1.51 | -19.07 | 9.71 | -2.71 |
| 3579 | Cc1cc(ccc1F)N                   | C00394668 | -13.59 | -0.5  | -13.58 | 2.81 | -2.32 |
| 3580 | c1nc(c(c1n)Cl)N                 | C00967452 | -13.59 | -5.1  | -13.09 | 4.49 | 0.11  |
| 3581 | c1cc([nH]c1)C=O                 | C01069171 | -13.59 | -2.29 | -16.69 | 6.48 | -1.49 |
| 3582 | c1cc(nnc1NN)Cl                  | C01225177 | -13.59 | -5.21 | -14.77 | 6.84 | -0.45 |
| 3583 | c1c(ocn1Cl)CCO                  | C01608228 | -13.59 | -2.59 | -14.26 | 3.77 | -0.52 |
| 3584 | CCCC/C=C/C#N                    | C01729045 | -13.59 | 0.01  | -15.12 | 4.02 | -2.49 |
| 3585 | c1c[nH]c(=S)nc1                 | C02008823 | -13.59 | -2.26 | -14.91 | 5.01 | -1.42 |
| 3586 | C(=O)(C(=O)N)C(F)F)F            | C02525295 | -13.59 | -3.11 | -15.13 | 3.65 | 1.01  |
| 3587 | c1c(c(nno1)N)C#N                | C04289162 | -13.59 | -2.47 | -15.42 | 5.42 | -1.12 |
| 3588 | CC(=O)O/C=C/OC(=O)C             | C05431797 | -13.59 | 0.33  | -17.67 | 7.32 | -3.57 |
| 3589 | Cc1ccc(nc1)C                    | C08294955 | -13.59 | -1.37 | -12.15 | 3.05 | -3.12 |
| 3590 | CC(=O)[C@H]1[C@H](O1)c2ccccc2   | C13213324 | -13.59 | 0.06  | -18.91 | 7.38 | -2.12 |
| 3591 | C/C(=C)Br)C#N                   | C16138636 | -13.59 | -0.31 | -13.06 | 2.56 | -2.78 |
| 3592 | C1C[NH+](=C)S1N                 | C17744492 | -13.59 | -1.71 | -14.4  | 2.68 | -0.15 |
| 3593 | c1cc(c(c1CC(=O)F)F)N            | C21985471 | -13.59 | -3.75 | -13.71 | 6.01 | -2.13 |
| 3594 | c1c(c(c(c1F)F)NN)F)F            | C00035750 | -13.58 | -0.85 | -13.22 | 2.13 | -1.65 |
| 3595 | Cc1[nH]cc(n1)C=O                | C00164636 | -13.58 | -2.03 | -16.78 | 6.52 | -1.29 |
| 3596 | Cc1cc(no1)C(=O)N                | C00401316 | -13.58 | -2.36 | -17.16 | 5.59 | 0.37  |

|      |                                 |           |        |       |        |       |       |
|------|---------------------------------|-----------|--------|-------|--------|-------|-------|
| 3597 | c1cc(ncc1O)C=O                  | C01716571 | -13.58 | -3.8  | -14.99 | 4.87  | 0.34  |
| 3598 | c1cssc1=S                       | C01846561 | -13.58 | -2.6  | -14.99 | 8.35  | -4.34 |
| 3599 | Cn1cncc1C(=O)Cl                 | C02509362 | -13.58 | 0.71  | -17    | 5.51  | -2.81 |
| 3600 | CC(=O)SCC#N                     | C02555811 | -13.58 | -0.96 | -15.12 | 4.77  | -2.28 |
| 3601 | c1ccc(c(c1)c2ccno2)F            | C02578084 | -13.58 | -0.02 | -15.98 | 4.64  | -2.22 |
| 3602 | c1c[nH]cc(c1=O)F                | C02599064 | -13.58 | -1.61 | -16.08 | 4.03  | 0.08  |
| 3603 | c1cc2c(nc1)nc(o2)[S-]           | C03884046 | -13.58 | -3.27 | -17.49 | 7.85  | -0.67 |
| 3604 | C[C@@H]1Cn2c(=O)[nH]nc2S1       | C04761200 | -13.58 | -0.59 | -18.59 | 7.2   | -1.59 |
| 3605 | c1ccc2c(c1)nc(o2)NN             | C05011791 | -13.58 | -5.66 | -13.77 | 5.7   | 0.16  |
| 3606 | COC(=O)Nc1c(c(c(c1F)F)F)F       | C06126161 | -13.58 | 1.27  | -16    | 4.23  | -3.09 |
| 3607 | c1cc(nnc1[O-])Cl                | C08616208 | -13.58 | -4.83 | -16.52 | 6.22  | 1.55  |
| 3608 | Cc1ccccc1/C(=N/O)/N             | C13477352 | -13.58 | -3.51 | -14.72 | 6.17  | -1.53 |
| 3609 | c1cnccc1C(=S)N                  | C00154867 | -13.57 | -3.51 | -17.81 | 9.26  | -1.52 |
| 3610 | Cn1ccc(=N)cc1                   | C00330933 | -13.57 | -3.57 | -16.4  | 8.38  | -1.98 |
| 3611 | c1cc(sc1[N+](=O)[O-])Br         | C01103311 | -13.57 | -1.75 | -14.89 | 3.2   | -0.12 |
| 3612 | C=CC(=O)OCCCl                   | C01561511 | -13.57 | -0.79 | -14.16 | 4.63  | -3.26 |
| 3613 | c1cc(sc1)I                      | C01587822 | -13.57 | -0.56 | -14.73 | 1.46  | 0.26  |
| 3614 | c1cc([nH]c1)C(=O)Cl             | C01674530 | -13.57 | -1.44 | -13.75 | 4.8   | -3.19 |
| 3615 | c1cccc(=O)cc1                   | C02034873 | -13.57 | -1.99 | -16.77 | 8.28  | -3.09 |
| 3616 | c1cc(cc(c1)F)CN=C=S             | C02528111 | -13.57 | -0.43 | -12.31 | 2.94  | -3.77 |
| 3617 | CCOC1cccc(c1)F                  | C02568102 | -13.57 | -1.47 | -13.02 | 2.47  | -1.55 |
| 3618 | c1cc(sc1)CN=C=S                 | C02582030 | -13.57 | -1.88 | -15.44 | 2.42  | 1.32  |
| 3619 | CCOC(=O)[C@@H](F)Br             | C02584260 | -13.57 | -1.39 | -12.25 | 3.01  | -2.93 |
| 3620 | C1CCC(=CC1)NC=O                 | C06691800 | -13.57 | -1.79 | -16.67 | 5.09  | -0.19 |
| 3621 | CO/C=C/C(F)F                    | C08698287 | -13.57 | -2.05 | -13.32 | 3.94  | -2.14 |
| 3622 | C(/C(=N/O)/C(F)F)F)Br           | C14628464 | -13.57 | -1.85 | -14.2  | 3.45  | -0.95 |
| 3623 | c1c(csn1)N                      | C20417334 | -13.57 | -2.54 | -15.06 | 3.95  | 0.08  |
| 3624 | c1cc(cnc1)CC(F)F                | C30714905 | -13.57 | -2.09 | -12.25 | 4.13  | -3.36 |
| 3625 | CC(=C)OC(=O)C                   | C00154688 | -13.56 | -0.54 | -14.12 | 4.1   | -3    |
| 3626 | c1c(cncc1Br)C#N                 | C00161484 | -13.56 | -0.89 | -13.04 | 3.18  | -2.81 |
| 3627 | CCc1ccc(cc1)O                   | C00404411 | -13.56 | -0.92 | -16.19 | 3.7   | -0.14 |
| 3628 | CCc1c(ccc1)O                    | C01665466 | -13.56 | -1.1  | -14.51 | 3.77  | -1.73 |
| 3629 | C=C(CN=C=S)Br                   | C01697477 | -13.56 | 0.77  | -17.59 | 2.26  | 0.99  |
| 3630 | CCOC(=O)N(C)Cl                  | C01748985 | -13.56 | -1.14 | -12.46 | 2.15  | -2.11 |
| 3631 | c1cc(ncc1C(F)F)Cl               | C02168608 | -13.56 | -1.87 | -12.54 | 2.61  | -1.76 |
| 3632 | Cc1ccc(cc1)OCC#N                | C02170125 | -13.56 | 1.15  | -18.71 | 6.07  | -2.07 |
| 3633 | c1cc(c(c1N)F)F                  | C02243354 | -13.56 | -3.25 | -16.21 | 5.51  | 0.4   |
| 3634 | COCCC(=O)Cl                     | C02574132 | -13.56 | -1.05 | -13.93 | 2.67  | -1.24 |
| 3635 | COC(=O)CCS                      | C03860879 | -13.56 | -0.49 | -13.85 | 3.1   | -2.31 |
| 3636 | COC(=N)C(C(C(C(F)F)F)F)F        | C04627537 | -13.56 | -1.04 | -12.33 | 2.2   | -2.4  |
| 3637 | c1cnccc1CCO                     | C08294937 | -13.56 | -1.7  | -14.9  | 3.7   | -0.66 |
| 3638 | c1cc2c(cc1F)nc([nH]2)NN         | C14987849 | -13.56 | -6.29 | -10.45 | 5.79  | -2.62 |
| 3639 | CCc1csc(n1)N                    | C15015336 | -13.56 | 0.47  | -15.99 | 3.65  | -1.7  |
| 3640 | Cc1ncc(c(n1)N)N                 | C25491251 | -13.56 | -5.91 | -15.65 | 7.44  | 0.55  |
| 3641 | c1ccc(c(c1)N)OC(F)F             | C00163283 | -13.55 | -2.58 | -12.63 | 2.35  | -0.68 |
| 3642 | c1ccnc(c1)C#N                   | C00404339 | -13.55 | 0.13  | -17.35 | 5.94  | -2.27 |
| 3643 | c1cc(c(cc1O)Cl)O                | C00404794 | -13.55 | -1.58 | -16.25 | 3.81  | 0.48  |
| 3644 | CCSC(=O)C(F)F                   | C01569573 | -13.55 | -0.95 | -11.71 | 1.94  | -2.83 |
| 3645 | CCC(=O)c1ccc(o1)[N+](=O)[O-]    | C01583723 | -13.55 | -0.66 | -13.69 | 4.35  | -3.54 |
| 3646 | CNC(=O)Oc1cccc(c1)N             | C01716721 | -13.55 | -0.75 | -19.5  | 7.11  | -0.42 |
| 3647 | C[C@H](C(=O)Cl)Br               | C01847220 | -13.55 | 0.47  | -13.72 | 2.1   | -2.4  |
| 3648 | Cc1cc(cnc1F)Cl                  | C02384024 | -13.55 | -0.52 | -14.98 | 2.79  | -0.84 |
| 3649 | c1c(cnc(c1F)F)C(F)F             | C02540285 | -13.55 | 0.49  | -13.66 | 2.42  | -2.81 |
| 3650 | c1cc2c(cc1F)[nH]c(=O)[nH]2      | C02547617 | -13.55 | -3.4  | -14.7  | 5.78  | -1.23 |
| 3651 | C(C(=O)Br)Br                    | C03860232 | -13.55 | 0.17  | -14.63 | 2.89  | -1.99 |
| 3652 | CCOC(=O)C(=C/C(=O)C)/[O-]       | C03861646 | -13.55 | 0.85  | -15.82 | 4.1   | -2.67 |
| 3653 | C1C=C[C@H]2[C@H]1C(=O)C2        | C05046474 | -13.55 | -0.67 | -12.62 | 3.05  | -3.3  |
| 3654 | c1ccc2c(c1)[nH]c(=S)o2          | C12341569 | -13.55 | -1.64 | -15.77 | 5.08  | -1.21 |
| 3655 | c1cc(ncc1Br)CO                  | C12370891 | -13.55 | -3.45 | -12.71 | 3.11  | -0.5  |
| 3656 | c1cc2c(cc1Cl)nncc2              | C16431183 | -13.55 | -2.44 | -12.49 | 4.38  | -3    |
| 3657 | c1ccc(c(c1)COCC(F)F)F           | C19272316 | -13.55 | -3.14 | -13.37 | 5.9   | -2.94 |
| 3658 | c1cc(c(cc1F)F)NCC#N             | C20053279 | -13.55 | -2.91 | -14.41 | 6.85  | -3.09 |
| 3659 | c1cc(nnc1N)I                    | C20357599 | -13.55 | -3.53 | -15.49 | 6.51  | -1.05 |
| 3660 | COc1cc(no1)N                    | C21298963 | -13.55 | -1.9  | -15.82 | 5.18  | -1.01 |
| 3661 | c1cc(nc(c1N)N)Cl                | C22116128 | -13.55 | -5.64 | -14.57 | 6.54  | 0.11  |
| 3662 | C1COCC=C1                       | C32152383 | -13.55 | -0.69 | -12.84 | 1.68  | -1.7  |
| 3663 | CC(=O)NCC1ccnc1                 | C00160564 | -13.54 | 0.02  | -18.93 | 6.76  | -1.39 |
| 3664 | Cc1ncc(c(n1)N)Br                | C00392459 | -13.54 | -3.57 | -15.11 | 3.05  | 2.08  |
| 3665 | COC(=O)c1[n-]nc(n1)[N+](=O)[O-] | C01574152 | -13.54 | -2.23 | -12.36 | 4.96  | -3.91 |
| 3666 | CCOC(=O)C=C                     | C01586528 | -13.54 | -0.47 | -14.23 | 3.94  | -2.77 |
| 3667 | c1ccn2c(c1)nnn2                 | C01587624 | -13.54 | -3.2  | -19.03 | 10.63 | -1.93 |
| 3668 | C=C[C@H](CB)O                   | C01997856 | -13.54 | -1.22 | -13.9  | 2.39  | -0.81 |
| 3669 | CCOC(=O)CC(=O)Cl                | C02242607 | -13.54 | -2.51 | -14.6  | 6.98  | -3.41 |
| 3670 | COC(=O)C(C(=O)F)F               | C02516002 | -13.54 | -0.07 | -12.77 | 2.22  | -2.92 |
| 3671 | C=C[C@H]1CCCCC1=O               | C05496344 | -13.54 | 2.32  | -15.32 | 3.29  | -3.82 |
| 3672 | COc1ccc(nc1)N                   | C14982095 | -13.54 | -2.4  | -15.49 | 4.92  | -0.57 |
| 3673 | CCOC(=O)c1c(mns1)N              | C15221690 | -13.54 | -1.6  | -14.19 | 3.54  | -1.29 |
| 3674 | c1c/c(=N/O)/[nH]cc1C(F)F        | C16383544 | -13.54 | -6.34 | -10.46 | 4.59  | -1.32 |
| 3675 | CC(=O)c1[nH]ccn1                | C16696747 | -13.54 | -1    | -16.12 | 5.18  | -1.6  |
| 3676 | [H]/N=C/1NCC(=NN1)N             | C17045389 | -13.54 | -7.88 | -15.41 | 10.5  | -0.74 |
| 3677 | CN(c1ccc(cc1)Cl)N               | C32105957 | -13.54 | -1.53 | -12.09 | 2.83  | -2.76 |
| 3678 | CN(C)C(=O)c1ccc(o1)Cl           | C32904163 | -13.54 | -0.91 | -14.19 | 4     | -2.44 |
| 3679 | CN(c1ccccc1)N                   | C00388434 | -13.53 | -0.83 | -13.12 | 2.82  | -2.4  |
| 3680 | c1ccn(c(=O)c1)CC#N              | C00536182 | -13.53 | -2.28 | -20.23 | 12.01 | -3.04 |
| 3681 | c1cc2c([nH]c(n2)CC#N)nc1        | C01304619 | -13.53 | -5.82 | -17.52 | 12.75 | -2.94 |
| 3682 | CCOC(=O)CCCl                    | C01648267 | -13.53 | -0.64 | -12.46 | 2.94  | -3.38 |
| 3683 | CC(=O)NCC1cccs1                 | C02016200 | -13.53 | -0.17 | -16.9  | 5.59  | -2.06 |
| 3684 | C/C=C(/C)C=O                    | C02039911 | -13.53 | -1.3  | -14.1  | 4.25  | -2.38 |
| 3685 | Cn1cc(cn1)N                     | C02552486 | -13.53 | -2.78 | -14.9  | 4.3   | -0.14 |
| 3686 | C1C=CCC1=O                      | C02569653 | -13.53 | -0.73 | -13.53 | 3.09  | -2.36 |



|      |                                |           |        |       |        |       |       |
|------|--------------------------------|-----------|--------|-------|--------|-------|-------|
| 3687 | C1CCC(=CC1)C[N+](=O)[O-]       | C04285346 | -13.53 | 0.49  | -16.58 | 3.36  | -0.79 |
| 3688 | CCOc1nc(ns1)N                  | C04290485 | -13.53 | -2.75 | -15.61 | 4.71  | 0.12  |
| 3689 | c1cc(ccc1OC(F)(F)F)Cl          | C05225638 | -13.53 | 0.16  | -12.96 | 1.31  | -2.03 |
| 3690 | CcN1cnc(n1)N                   | C05957038 | -13.53 | -2.01 | -15.17 | 6.89  | -3.24 |
| 3691 | c1cc(=O)[nH]cc1F               | C08698071 | -13.53 | -2.45 | -15.93 | 3.93  | 0.92  |
| 3692 | Cc1[nH]c(n1)C=O                | C12956226 | -13.53 | -5.21 | -12.54 | 5.46  | -1.25 |
| 3693 | Cn1cnc1C=O                     | C20443586 | -13.53 | -3.26 | -15.12 | 7.3   | -2.45 |
| 3694 | [H]/N=C(/C)\SC(C)C             | C22309033 | -13.53 | -2.08 | -10.87 | 1.87  | -2.45 |
| 3695 | c1ccc2c(c1)nns2                | C00031178 | -13.52 | -2.82 | -17.01 | 6.13  | 0.18  |
| 3696 | c1cc(oc1C=O)I                  | C00065135 | -13.52 | -0.58 | -15.34 | 3.13  | -0.72 |
| 3697 | c1cc2c(nc1)n(nn2)O             | C00396136 | -13.52 | -5.85 | -16.18 | 8.29  | 0.22  |
| 3698 | CC(C)O[N+](=O)[O-]             | C01569571 | -13.52 | -1.37 | -11.03 | 2.01  | -3.14 |
| 3699 | CCCCOC=C                       | C01586529 | -13.52 | -0.13 | -13.33 | 1.57  | -1.64 |
| 3700 | C1=CC(=NNC(=O)N)C=C1           | C01700518 | -13.52 | -5.14 | -13.67 | 5.18  | 0.11  |
| 3701 | C1[C@H](C=C1)CO                | C02032015 | -13.52 | -0.77 | -14.04 | 2.19  | -0.9  |
| 3702 | CN(C)C(=O)n1ccnc1              | C02450819 | -13.52 | -1.96 | -16.59 | 7.75  | -2.73 |
| 3703 | c1cncnc1CO                     | C02511466 | -13.52 | -4.19 | -15.36 | 4.33  | 1.7   |
| 3704 | CCCO[P@H](=O)C=C=C             | C05431490 | -13.52 | 2.69  | -19.51 | 5.8   | -2.5  |
| 3705 | CcN1cccn1                      | C06125795 | -13.52 | -0.42 | -14.9  | 4.25  | -2.45 |
| 3706 | C1Cc2c(noc2N)C1                | C06855320 | -13.52 | -3.3  | -16.41 | 5.02  | 1.18  |
| 3707 | Cc1cc([nH]1)C(=O)N             | C10342264 | -13.52 | -4.31 | -17.44 | 7.09  | 1.14  |
| 3708 | c1c(ccc1)O                     | C13208871 | -13.52 | -3.64 | -16.44 | 4.35  | 2.2   |
| 3709 | Cc1ccc(s1)[C@@H]2CO2           | C19271536 | -13.52 | -1.74 | -14.12 | 4.89  | -2.55 |
| 3710 | C(#N)c1nc([nH]n1)N             | C19802969 | -13.52 | -5.35 | -16.53 | 9.73  | -1.37 |
| 3711 | c1cn2c(cc1Br)ncn2              | C30677876 | -13.52 | -3.74 | -10.99 | 5.47  | -4.27 |
| 3712 | C/C(=C/C(=O)C)Cl/[O-]          | C01995229 | -13.51 | 0.68  | -14.52 | 2.38  | -2.04 |
| 3713 | CNc1ccccc1F                    | C02243024 | -13.51 | -1.05 | -12.44 | 2.61  | -2.63 |
| 3714 | c1cc(ccc1CC(F)(F)F)N           | C02540430 | -13.51 | -1.6  | -11.86 | 3.05  | -3.1  |
| 3715 | c1cc(ccc1N)OCC#N               | C03338693 | -13.51 | -1.12 | -16.98 | 6.43  | -1.84 |
| 3716 | c1cc(ccc1CSC(=[NH2+])N)F       | C04013946 | -13.51 | -1.09 | -12.82 | 3.11  | -2.71 |
| 3717 | c1cc(ccc1Cl)FCS                | C04244669 | -13.51 | 0.15  | -11.49 | 2.27  | -4.45 |
| 3718 | c1nnc(s1)[N+](=O)[O-]          | C05105421 | -13.51 | -1.94 | -18.18 | 7.67  | -1.06 |
| 3719 | c1onn(c1)C(=O)C(F)F            | C05705288 | -13.51 | -2    | -14.04 | 4.61  | -2.07 |
| 3720 | c1cnc(cc1Cl)O                  | C12359529 | -13.51 | -2.1  | -16.1  | 3.82  | 0.87  |
| 3721 | c1ccc(cc1)CNC(=S)NN            | C13684764 | -13.51 | 0.08  | -20.83 | 9.99  | -2.76 |
| 3722 | [C@@H](C(F)F)(OC(F)F)F         | C16082612 | -13.51 | -0.15 | -13.69 | 1.96  | -1.64 |
| 3723 | C/C(=C/C(=O)C)Nc1[nH]cnn1      | C16134370 | -13.51 | -0.44 | -18.28 | 10.44 | -5.22 |
| 3724 | c1cnc2c(n1)c([nH]n2)N          | C16982871 | -13.51 | -2.39 | -19.09 | 7.52  | 0.46  |
| 3725 | COC(=O)/C=C/c1ccc(cc1)F        | C00567266 | -13.5  | -1.03 | -14.54 | 4.69  | -2.62 |
| 3726 | c1cc(c(c1)Cl)N)N               | C01588400 | -13.5  | -3.44 | -11.82 | 2.52  | -0.76 |
| 3727 | C=CCOCC#N                      | C01640805 | -13.5  | -1.01 | -14.88 | 4.28  | -1.89 |
| 3728 | c1ccc(cc1)C(=O)ON              | C01732511 | -13.5  | 1.92  | -17.66 | 5.06  | -2.83 |
| 3729 | Cn1cc(cn1)I                    | C02547891 | -13.5  | 0.83  | -15.14 | 3.51  | -2.69 |
| 3730 | c1cc(ccc1/C=N)N)F              | C05893819 | -13.5  | -2.04 | -15.88 | 3.18  | 1.24  |
| 3731 | Cc1ccccc1C                     | C08294959 | -13.5  | -1.67 | -12.02 | 3.1   | -2.91 |
| 3732 | c1cc(nc(c1)[N+](=O)[O-])[O-]Cl | C13301916 | -13.5  | -3.82 | -14.63 | 5.6   | -0.64 |
| 3733 | c1cc(c(cc1N)Br)O               | C14628846 | -13.5  | -2.03 | -14.69 | 3.38  | -0.16 |
| 3734 | c1cc(c(c1)F)[N+](=O)[O-]N      | C16158504 | -13.5  | -2.24 | -15.88 | 7.03  | -2.4  |
| 3735 | C1CCC(=CC1)/C=N/O              | C16952893 | -13.5  | -1.58 | -14.4  | 4.26  | -1.78 |
| 3736 | c1csc2c1[C@@H](CC2)O           | C19727103 | -13.5  | -1.06 | -15.81 | 4.95  | -1.58 |
| 3737 | Cc1cc(ccc1O)O                  | C00388086 | -13.49 | -3    | -14.66 | 3.83  | 0.35  |
| 3738 | C=CCOC(=O)OCC=C                | C01562404 | -13.49 | -0.77 | -11.98 | 3.1   | -3.83 |
| 3739 | Cc1cc(n(c1)O)C#N               | C01755384 | -13.49 | -0.58 | -16.89 | 5.3   | -1.31 |
| 3740 | [H]/N=C(/C)\CCl)OC             | C04613656 | -13.49 | -2.29 | -13.43 | 2.24  | -0.01 |
| 3741 | CCO[C@H]1C=CC(=O)O1            | C05316553 | -13.49 | -2    | -16.12 | 7.15  | -2.51 |
| 3742 | COC(=O)CSc1[nH]cnc1            | C05660255 | -13.49 | -1.97 | -14.79 | 5.87  | -2.61 |
| 3743 | CCOC(=O)N(CCF)N=O              | C05665076 | -13.49 | -1.95 | -13.23 | 3.28  | -1.58 |
| 3744 | c1c(cnc(c1O)Cl)Br              | C14400912 | -13.49 | -2.94 | -12.86 | 3.08  | -0.77 |
| 3745 | c1cc(c(cc1C)N)F                | C19385524 | -13.49 | 0.21  | -16.81 | 4.49  | -1.39 |
| 3746 | c1nnc(n1)CCBr                  | C19414595 | -13.49 | 0.1   | -14.57 | 5.03  | -4.05 |
| 3747 | c1(nc(nc(n1)N)N)N              | C00897751 | -13.48 | -2.68 | -14.76 | 5.42  | -1.46 |
| 3748 | c1cnn(c1N)Cc2ccsc2             | C04206193 | -13.48 | 0.34  | -16.08 | 5.22  | -2.97 |
| 3749 | c1(nnc(s1)Cl)Cl                | C05215421 | -13.48 | -1.14 | -15.02 | 2.56  | 0.12  |
| 3750 | c1nnc(s1)[S-]                  | C05226028 | -13.48 | -1.61 | -15.99 | 4.77  | -0.64 |
| 3751 | c12c(nc(nc1n[nH]n2)F)N         | C05479749 | -13.48 | -4.3  | -17.13 | 7.29  | 0.67  |
| 3752 | Cc1cnc([nH]c1=O)N              | C17322277 | -13.48 | -3.33 | -16.53 | 5.36  | 1.02  |
| 3753 | c1nc(nn1CCO)N                  | C19088805 | -13.48 | -4.44 | -15.53 | 6.95  | -0.45 |
| 3754 | c1cc(sc1C)N)Cl                 | C19410224 | -13.48 | -0.38 | -13.61 | 1.73  | -1.22 |
| 3755 | c1cnncc(c1N)C#N                | C19854097 | -13.48 | -3.01 | -18.54 | 7.93  | 0.14  |
| 3756 | c1ccc2c(c1)nnn2C#N             | C00406327 | -13.47 | 1.51  | -15.57 | 5.3   | -4.72 |
| 3757 | CCOCc1ccccc1                   | C01586382 | -13.47 | -0.41 | -14.83 | 2.47  | -0.7  |
| 3758 | c1cnc(cn1)CON                  | C01722640 | -13.47 | 0.92  | -19.82 | 4.62  | 0.81  |
| 3759 | COc1ccc(cc1F)F                 | C02539389 | -13.47 | 1.83  | -15.91 | 3.56  | -2.96 |
| 3760 | C1(=O)C(C(=O)NC(=O)N1)(F)F     | C03040745 | -13.47 | 0.18  | -19.72 | 4.69  | 1.36  |
| 3761 | c1cc2c(cc1Cl)con2              | C06414093 | -13.47 | -1.67 | -13.19 | 4.85  | -3.45 |
| 3762 | COC(=O)Cn1ccnc1                | C08377783 | -13.47 | -2.82 | -15.16 | 6.39  | -1.89 |
| 3763 | c1cnc(c1)OC#N                  | C12958642 | -13.47 | 0.78  | -19.98 | 5.07  | 0.66  |
| 3764 | c1ccc(c(c1)/C=C)C=O)O          | C13547077 | -13.47 | -2.35 | -15.13 | 5.93  | -1.92 |
| 3765 | CSc1c(nc(=O)[nH]n1)[O-]        | C20829009 | -13.47 | -2.75 | -17.79 | 6.01  | 1.06  |
| 3766 | C/C=C/[N+](=O)[O-]             | C21304285 | -13.47 | -1.55 | -14.29 | 5.15  | -2.78 |
| 3767 | [C@H](c1ccccc1N)O              | C21985758 | -13.47 | -1.79 | -17.12 | 5.25  | 0.2   |
| 3768 | c1c(cnc(c1Cl)C)C#N             | C22995864 | -13.47 | -1.28 | -12.59 | 3.41  | -3.01 |
| 3769 | CC(=O)Nc1ccccc1F               | C00126905 | -13.46 | -1.05 | -15.28 | 5.61  | -2.75 |
| 3770 | c1cc(ccc1CO)O                  | C00388762 | -13.46 | -1.13 | -17.87 | 4.59  | 0.95  |
| 3771 | c1cc(ccc1NC=O)O                | C00410172 | -13.46 | -1.34 | -20.73 | 8.41  | 0.19  |
| 3772 | CC(=O)Oc1ccc(cc1)C=O           | C01672089 | -13.46 | -1.03 | -16.51 | 8.17  | -4.09 |
| 3773 | C1CC1N=C=S                     | C02168469 | -13.46 | -0.57 | -12.45 | 1.74  | -2.18 |
| 3774 | c1csc(c1Cl)C=O                 | C02383503 | -13.46 | -1.91 | -14.97 | 3.87  | -0.44 |
| 3775 | CC(=O)C1=CCCC1                 | C02569899 | -13.46 | -0.9  | -13.03 | 3.88  | -3.41 |
| 3776 | c1cc(c(cc1SC#N)Cl)N            | C03886711 | -13.46 | -1.71 | -14.87 | 3.16  | -0.05 |

|      |                                      |           |        |       |        |       |       |
|------|--------------------------------------|-----------|--------|-------|--------|-------|-------|
| 3777 | c1cc(ccc1O)O                         | C05133378 | -13.46 | -0.86 | -17.24 | 3.67  | 0.97  |
| 3778 | c1ccc(c(c1)C)C2cccs2N                | C32008179 | -13.46 | -1.01 | -11.06 | 3.21  | -4.6  |
| 3779 | C1CC[NH+](C1)CC(=O)Cl                | C32016244 | -13.46 | -0.95 | -14.11 | 3.12  | -1.53 |
| 3780 | c1cc(cc(c1)F)CON                     | C00168990 | -13.45 | 1.33  | -16.41 | 3.45  | -1.81 |
| 3781 | c1cncc2c1[nH]c(n2)C(F)(F)F           | C00549515 | -13.45 | -4.24 | -12.23 | 5.19  | -2.17 |
| 3782 | CC(=C)COC(=O)C=C                     | C01608909 | -13.45 | -0.67 | -14.12 | 3.88  | -2.55 |
| 3783 | C(C#N)c1c(c(c(c1F)F)F)F              | C01612151 | -13.45 | -0.88 | -13.41 | 5.7   | -4.86 |
| 3784 | CCOC(=O)[C@H](C)F                    | C01674837 | -13.45 | -0.73 | -13.56 | 3.86  | -3.03 |
| 3785 | C=CC(=O)Oc1ccccc1                    | C01850915 | -13.45 | -0.2  | -14.32 | 5.8   | -4.73 |
| 3786 | c1ccc2c(c1)c(c[nH]2)F                | C02529146 | -13.45 | -1.13 | -13.85 | 4.94  | -3.41 |
| 3787 | CC(=C)CCC#N                          | C02557576 | -13.45 | -0.77 | -14.11 | 4.07  | -2.65 |
| 3788 | c1c(scn1)C=O                         | C02577851 | -13.45 | -2.64 | -15.79 | 6.16  | -1.18 |
| 3789 | c1cc(c(nc1)C=O)F                     | C04208890 | -13.45 | -3.16 | -15.26 | 6.82  | -1.85 |
| 3790 | c1nncn1n2cnnc2                       | C04843822 | -13.45 | -0.94 | -19.04 | 9.73  | -3.19 |
| 3791 | [H]N=C/c1ccccc1O                     | C04921497 | -13.45 | -2.85 | -14.01 | 4.1   | -0.69 |
| 3792 | c1cnc(c1)N                           | C14982080 | -13.45 | 0.12  | -15.08 | 3.42  | -1.91 |
| 3793 | c1cc(nnc1C(=O)N)Cl                   | C16123717 | -13.45 | -3.81 | -15.39 | 5     | 0.75  |
| 3794 | Cc1cncnc1C=O                         | C20443751 | -13.45 | 1.53  | -16.73 | 3.95  | -2.2  |
| 3795 | CC(=O)c1cncnc1                       | C00163730 | -13.44 | -2.48 | -14.86 | 5.14  | -1.24 |
| 3796 | C[C@H]1C(=O)C=C(O)1C                 | C00164379 | -13.44 | -1.24 | -14.86 | 4.74  | -2.08 |
| 3797 | Cc1cccc(=O)[nH]1                     | C00164932 | -13.44 | -2.59 | -17.25 | 7.96  | -1.56 |
| 3798 | Cc1cc(nc(n1)F)F                      | C01582390 | -13.44 | -1.34 | -14.9  | 4.69  | -1.89 |
| 3799 | c1cc(cc(c1)N=C=O)C(F)(F)F            | C02040817 | -13.44 | -2    | -11.35 | 2.32  | -2.41 |
| 3800 | C=C(C(=O)OC(C(F)(F)F)C(F)(F)F)F      | C02243173 | -13.44 | -0.62 | -11.2  | 3.56  | -5.18 |
| 3801 | C(C(=O)c1c(nofn+1)[O-])NBr           | C03165401 | -13.44 | -0.31 | -15.87 | 4.98  | -2.24 |
| 3802 | C1(=[N+]=[N-])C(=O)NC(=O)N=C1[O-]    | C04071678 | -13.44 | 0.29  | -20.66 | 4.66  | 2.27  |
| 3803 | c1c(nns1)N                           | C04945770 | -13.44 | -3.25 | -14.93 | 4.56  | 0.18  |
| 3804 | CNC(=[NH2+])SC                       | C06590260 | -13.44 | -3.14 | -12.46 | 2.24  | -0.08 |
| 3805 | C/C=C/C(=O)OCC=C                     | C08612885 | -13.44 | -1.33 | -11.86 | 3.46  | -3.71 |
| 3806 | CCCCON=O                             | C20230701 | -13.44 | 0.22  | -12.12 | 1.96  | -3.5  |
| 3807 | COC(=O)CCBr                          | C01666985 | -13.43 | 0.06  | -13.81 | 3.06  | -2.74 |
| 3808 | CCC(=O)OCC#C                         | C01995101 | -13.43 | -0.08 | -14.28 | 4.32  | -3.4  |
| 3809 | CCCC(=O)Cl                           | C02040974 | -13.43 | -0.61 | -12.86 | 2.56  | -2.52 |
| 3810 | c1c(c[nH]1)c2c[nH]nc2                | C03306620 | -13.43 | -8.01 | -11.46 | 6.76  | -0.72 |
| 3811 | C1=C([C@H](N=N1)C=O)Br               | C04262629 | -13.43 | -5.46 | -13.51 | 6.53  | -0.98 |
| 3812 | c1c(c([nH]1)C(=N)O)N)Br              | C04277649 | -13.43 | -4.65 | -15.2  | 5.18  | 1.24  |
| 3813 | C1C=CCOC1                            | C04411091 | -13.43 | -0.67 | -14.04 | 2.47  | -1.2  |
| 3814 | c1([n-]nnc1)NC(=[NH2+])N[N+](=O)[O-] | C05395785 | -13.43 | -9.39 | -20.79 | 16.25 | 0.49  |
| 3815 | CC/C=C/[N+](=O)[O-]                  | C05761952 | -13.43 | -1.44 | -14.79 | 4.59  | -1.79 |
| 3816 | Cc1c(cco1)Br                         | C12370514 | -13.43 | -1.61 | -11.39 | 2.47  | -2.9  |
| 3817 | CCOC(=O)C=CBr                        | C12405145 | -13.43 | -0.79 | -13.56 | 4.03  | -3.1  |
| 3818 | CCOC(=O)CC[N+](=O)[O-]               | C14614148 | -13.43 | -0.42 | -14.18 | 4.37  | -3.2  |
| 3819 | c1ccc1C[NH2+]N                       | C19275663 | -13.43 | -1.23 | -16.18 | 3.84  | 0.14  |
| 3820 | Cc1cc(ccc1F)OC(=O)Cl                 | C19615523 | -13.43 | -2.37 | -9.14  | 2.77  | -4.69 |
| 3821 | CNc1ccc(cn1)N                        | C22141615 | -13.43 | -2.35 | -15.64 | 4.85  | -0.29 |
| 3822 | c1cc(ncc1N)C#N                       | C00403997 | -13.42 | -0.46 | -18.79 | 6.53  | -0.7  |
| 3823 | C(COC(=O)Cl)CCl                      | C01845910 | -13.42 | 1.34  | -14.14 | 2.6   | -3.22 |
| 3824 | c1cc(c(cc1Cl)N)OC(F)F                | C02529872 | -13.42 | -1.55 | -13.82 | 3.9   | -1.95 |
| 3825 | CCOC(=O)[C@@]([C](F)(F)F)(F)Cl       | C02530824 | -13.42 | -0.78 | -10.56 | 1.65  | -3.74 |
| 3826 | Cn1cc(c(n1)N)Br                      | C02567054 | -13.42 | -3.02 | -13.86 | 4.62  | -1.17 |
| 3827 | Cc1c(cco1)C=O                        | C04208885 | -13.42 | -2.91 | -12.88 | 4.65  | -2.28 |
| 3828 | c1c(c([nH]1)C(F)F)Cl                 | C04243628 | -13.42 | -0.73 | -14.44 | 2.42  | -0.67 |
| 3829 | c1c(cc(cc1F)F)CS                     | C04244665 | -13.42 | -1.32 | -12.86 | 2.21  | -1.45 |
| 3830 | c1c[nH]nc1CCCl                       | C05386997 | -13.42 | -2.74 | -15.36 | 3.96  | 0.71  |
| 3831 | CC(=O)O[C@]([C@H]1CC(=O)C=C1         | C05663725 | -13.42 | 0.72  | -18.48 | 5.89  | -1.55 |
| 3832 | c1c[nH]c(=O)cc1F                     | C14982909 | -13.42 | -2.98 | -15.18 | 3.87  | 0.88  |
| 3833 | c1cc(c(c1NC(=O)C(F)F)F)F             | C00063065 | -13.41 | -3.2  | -10.19 | 3.29  | -3.31 |
| 3834 | Cn1cc(cn1)[N+](=O)[O-]               | C02038197 | -13.41 | -2.75 | -14.88 | 6.61  | -2.4  |
| 3835 | c1c(cc(c1F)O)F)N                     | C02243353 | -13.41 | -3.32 | -14.9  | 4.47  | 0.35  |
| 3836 | CCNc1ccc(cc1)F                       | C04206095 | -13.41 | -2.69 | -12.66 | 2.34  | -0.41 |
| 3837 | Cc1c(nc[n1])[N+](=O)[O-]             | C04343025 | -13.41 | -1.01 | -15.53 | 6.44  | -3.31 |
| 3838 | C1C(=O)N(C(=O)S1)CCCl                | C11804308 | -13.41 | 1.06  | -17.08 | 4.86  | -2.25 |
| 3839 | c1ccc(c(c1)OCC#N)F                   | C19485220 | -13.41 | -3.87 | -14.76 | 8.67  | -3.45 |
| 3840 | c1cc(c(c1NC(=S)NN)F)F                | C20426677 | -13.41 | -0.97 | -19.48 | 9.71  | -2.67 |
| 3841 | c1cnc1C#N                            | C22009492 | -13.41 | -3.64 | -13.98 | 5.92  | -1.72 |
| 3842 | c1cc(c(cc1[C@@]([C@H]2CO2)F)F        | C22165566 | -13.41 | -3.01 | -12.19 | 4.55  | -2.77 |
| 3843 | C1CCc2c(c([nH]2)C#N)C1               | C24732293 | -13.41 | -2.42 | -12.35 | 4.07  | -2.71 |
| 3844 | Cc1ncc(c(n1)Cl)F                     | C26466426 | -13.41 | -0.98 | -12.7  | 2.69  | -2.42 |
| 3845 | CCCc1cc([nH]1)C(F)F                  | C26547613 | -13.41 | -3.55 | -9.75  | 3.02  | -3.13 |
| 3846 | c1nc(c(c1N)C=O)N                     | C01556563 | -13.4  | -4.07 | -15.08 | 5.89  | -0.14 |
| 3847 | CC(=O)OC=C                           | C01586656 | -13.4  | -1.79 | -13.22 | 4     | -2.39 |
| 3848 | COC(=O)C(=C)Br                       | C01608900 | -13.4  | 0.37  | -15.89 | 3.5   | -1.38 |
| 3849 | C(CO)C(C(F)F)F                       | C02573965 | -13.4  | -2.99 | -11.99 | 2.24  | -0.66 |
| 3850 | C[C@H](CN=[N+]=[N-])OC(=O)C(F)F      | C04984156 | -13.4  | -1.37 | -13.24 | 3.68  | -2.48 |
| 3851 | c1cc(nnc1nnc2)[O-]                   | C06753419 | -13.4  | -3.69 | -15.68 | 7.81  | -1.85 |
| 3852 | c1c(oc1Br)CO                         | C08614800 | -13.4  | -2.65 | -14.03 | 3.8   | -0.52 |
| 3853 | c1c([nH]c(=O)c1[N+](=O)[O-])F        | C08698153 | -13.4  | -2.46 | -16.66 | 5     | 0.73  |
| 3854 | c1ccc(cc1)NC(=O)N2N=N2               | C00401686 | -13.39 | 0.45  | -18.28 | 4.55  | -0.11 |
| 3855 | COC(=O)c1c([nH]1)Cl                  | C01235058 | -13.39 | 0.1   | -18.02 | 5.09  | -0.56 |
| 3856 | c1c(c(nc1)Cl)Cl[N+](=O)[O-]          | C02023569 | -13.39 | -1.04 | -12.09 | 2.36  | -2.62 |
| 3857 | CCOCC=C                              | C02034774 | -13.39 | -0.46 | -12.19 | 1.45  | -2.2  |
| 3858 | C1CCC(C1)N=C=O                       | C02389322 | -13.39 | 0.46  | -14.27 | 1.59  | -1.17 |
| 3859 | c1c(c[n1])CC#N)Br                    | C02537512 | -13.39 | -3.55 | -16.27 | 9.23  | -2.8  |
| 3860 | c1c(cc(c1CO)F)F                      | C02575068 | -13.39 | -3.2  | -11.49 | 2.8   | -1.5  |
| 3861 | C=CCOC([C@]([C](F)F)F)F              | C02584542 | -13.39 | 0.05  | -12.24 | 2.45  | -3.64 |
| 3862 | c1cc(c(cc1O)[N+](=O)[O-])N           | C04262549 | -13.39 | -3.21 | -16.24 | 6.34  | -0.27 |
| 3863 | c1cc(c(c1F)C=O)F                     | C04290142 | -13.39 | -2.59 | -13.05 | 5.01  | -2.75 |
| 3864 | CC(=O)Oc1ccno1                       | C12359057 | -13.39 | 0.2   | -17.92 | 7.49  | -3.16 |
| 3865 | CC(=O)Oc1c(ccs1)N                    | C16124417 | -13.39 | -1.65 | -16.18 | 6.41  | -1.97 |
| 3866 | c1cnc(cc1C(F)F)F)NN                  | C16159621 | -13.39 | 0.06  | -15.49 | 3.75  | -1.71 |

|      |                                  |           |        |       |        |       |       |
|------|----------------------------------|-----------|--------|-------|--------|-------|-------|
| 3867 | C[C@H](c1cccs1)Cl                | C32005545 | -13.39 | -1.22 | -10.25 | 2.18  | -4.1  |
| 3868 | c1c(c(nH)1)C(F)(F)C(F)(F)F       | C01585877 | -13.38 | -3.47 | -12.93 | 6.27  | -3.25 |
| 3869 | CC(=O)C(=O)OC                    | C01692440 | -13.38 | -0.92 | -14.39 | 3.87  | -1.94 |
| 3870 | c1ccc(cc1)[C@H](C#CCO)O          | C01726269 | -13.38 | -1.22 | -17.41 | 5.88  | -0.63 |
| 3871 | COc1ccc(cc1)N                    | C04556034 | -13.38 | -2.53 | -12.7  | 3.09  | -1.24 |
| 3872 | C[C@H]([N+](=O)[O-])Br           | C04683080 | -13.38 | -0.44 | -13.64 | 3.02  | -2.32 |
| 3873 | CC1cnc(nc1N)N                    | C12344009 | -13.38 | -2.4  | -13.81 | 4.53  | -1.71 |
| 3874 | Cc1ccoc1N=C=O                    | C12370517 | -13.38 | -0.56 | -15.33 | 2.88  | -0.38 |
| 3875 | c1cc(c(cc1F)OCC#N)F              | C15442719 | -13.38 | -3.81 | -13.25 | 7.17  | -3.5  |
| 3876 | c1c(csc1CC#N)Br                  | C16123657 | -13.38 | -1.35 | -13.91 | 6     | -4.12 |
| 3877 | c1cnc(c(=O)[nH]1)N               | C17061495 | -13.38 | -3.46 | -18.28 | 7.36  | 0.99  |
| 3878 | CCOC(=O)/C(=N[O-])/C#N           | C18204413 | -13.38 | -7.2  | -11.8  | 6.59  | -0.97 |
| 3879 | CCOCCCl                          | C19415016 | -13.38 | -0.84 | -12.02 | 2.17  | -2.69 |
| 3880 | CCNc1ccc(cn1)N                   | C19952780 | -13.38 | -3.64 | -13.38 | 4.51  | -0.85 |
| 3881 | c1cc(c(cc1N)O)O                  | C00006364 | -13.37 | -2.27 | -18.2  | 5.12  | 1.97  |
| 3882 | c1cnc(nc1C(F)F)F                 | C01023366 | -13.37 | -0.21 | -15.4  | 4.42  | -2.17 |
| 3883 | COc(=O)CCN=C=S                   | C02390114 | -13.37 | 0.68  | -15.17 | 3.11  | -1.99 |
| 3884 | c1c(nc(c1Br)F)Cl                 | C02539939 | -13.37 | -1.07 | -11.51 | 2.06  | -2.84 |
| 3885 | CSC(=O)Cl                        | C04537766 | -13.37 | -1.25 | -13.98 | 2.27  | -0.41 |
| 3886 | c1cn(cn1)O                       | C05286604 | -13.37 | -4.35 | -12.9  | 4.79  | -0.91 |
| 3887 | c1c(c(cc(c1F)F)O)O               | C06091087 | -13.37 | -2.04 | -16.97 | 4.94  | 0.71  |
| 3888 | c1c(c(nH)n1)N                    | C12397092 | -13.37 | -3.17 | -15.94 | 4.17  | 1.56  |
| 3889 | C1CSC(=N1)N[N+](=O)[O-]          | C14983373 | -13.37 | -1.37 | -15.48 | 5.12  | -1.64 |
| 3890 | c1cc(c(c1C#N)F)F                 | C16159963 | -13.37 | -0.69 | -17.5  | 6.9   | -2.09 |
| 3891 | Cc1cnccc1CCl                     | C16948467 | -13.37 | -1.1  | -12.33 | 3.42  | -3.36 |
| 3892 | c1nc(nc1)C=O                     | C20443630 | -13.37 | -3.26 | -16.68 | 6.86  | -0.29 |
| 3893 | C1CSC[C@@H]1S                    | C20476693 | -13.37 | 0.48  | -12.81 | 1.94  | -2.98 |
| 3894 | Cc1ccc(cc1O)C#N                  | C22114923 | -13.37 | -2.36 | -14.82 | 5.79  | -1.98 |
| 3895 | c1cc(ccc1CO)Cl                   | C00157482 | -13.36 | -2.47 | -12.53 | 3.21  | -1.56 |
| 3896 | CCOC(=O)OCC                      | C00388482 | -13.36 | -0.6  | -13.19 | 3.35  | -2.92 |
| 3897 | c1csc(n1)[N+](=O)[O-]            | C01582750 | -13.36 | -2.88 | -18.18 | 8.26  | -0.57 |
| 3898 | c1cnc2c1cnnc2                    | C01606663 | -13.36 | -2.6  | -17.28 | 6.75  | -0.22 |
| 3899 | C1C=CC(C=C1)CO                   | C01669156 | -13.36 | -1.13 | -13.13 | 2.29  | -1.39 |
| 3900 | c1cnccc1N                        | C08294943 | -13.36 | -3.13 | -16.46 | 5.91  | 0.33  |
| 3901 | C(/C=C/C)C#N                     | C19430709 | -13.36 | -1.89 | -14.56 | 5.95  | -2.87 |
| 3902 | c1(nc([nH]n1)N)C(F)F             | C19485644 | -13.36 | -5.52 | -15.56 | 9.5   | -1.78 |
| 3903 | c1cc(ccc1CN=C=O)O                | C19730727 | -13.36 | -1.35 | -18.4  | 5.74  | 0.65  |
| 3904 | c1c(oc(n1)N)[N+](=O)[O-]         | C19772587 | -13.36 | -5.32 | -17.92 | 8.26  | 1.62  |
| 3905 | Cc1ccnc1C(=O)C                   | C30678451 | -13.36 | 2.02  | -16.57 | 4.33  | -3.14 |
| 3906 | C[C@H]([C@H]1C#CC(=O)F)O         | C32005742 | -13.36 | -3.75 | -10.36 | 3.29  | -2.54 |
| 3907 | c1cc(c(c1)O)Cl                   | C32188351 | -13.36 | -2.99 | -15.95 | 5.74  | -0.15 |
| 3908 | c1cc(nnc1)N                      | C01621830 | -13.35 | -3.16 | -15.9  | 6.08  | -0.37 |
| 3909 | Cc1ccc(c1)F                      | C02243235 | -13.35 | -1.68 | -15.29 | 3.8   | -0.18 |
| 3910 | C=CCN(C(=O)N)N=O                 | C04706150 | -13.35 | -3.43 | -14.88 | 4     | 0.96  |
| 3911 | Cc1c(sc(n1)N)C                   | C08627583 | -13.35 | -3.2  | -11.95 | 3.72  | -1.92 |
| 3912 | C(n1c(=O)[nH]c(n1)[N+](=O)[O-])O | C16136400 | -13.35 | -2.91 | -16.85 | 6.13  | 0.27  |
| 3913 | COc(=O)Nc1ccc(c1)N               | C19815651 | -13.35 | 0.18  | -19.99 | 6.99  | -0.53 |
| 3914 | c1cc(oc1)C(=S)N                  | C00159594 | -13.34 | -2.62 | -17.44 | 8.16  | -1.43 |
| 3915 | c1ccc(cc1)Nc2ccccc2              | C00343387 | -13.34 | 1.53  | -13.94 | 4.33  | -5.25 |
| 3916 | Cc1cccc(c1)C#N                   | C01674308 | -13.34 | -0.72 | -12.2  | 3.69  | -4.12 |
| 3917 | C=C(=O)OCC(C(F)F)F               | C01847515 | -13.34 | 0.45  | -12.98 | 3.61  | -4.43 |
| 3918 | COc(=O)C1ccc(c1)F                | C02506532 | -13.34 | -0.25 | -16.24 | 5.74  | -2.6  |
| 3919 | COc1c(cccc1F)F                   | C02512335 | -13.34 | -2.2  | -12.73 | 4.52  | -2.93 |
| 3920 | CC(=CC#N)C                       | C02557575 | -13.34 | -0.69 | -14.54 | 4.35  | -2.46 |
| 3921 | c1c(cn1)CCO)Cl                   | C04290901 | -13.34 | -2.91 | -13.89 | 3.85  | -0.39 |
| 3922 | C1CC1C(=O)C(F)F                  | C08700957 | -13.34 | -0.45 | -12.38 | 2.38  | -2.89 |
| 3923 | CCO/C=C/Br                       | C12359516 | -13.34 | -1.05 | -12.58 | 2.64  | -2.34 |
| 3924 | c1c(c(c(n1)N)Cl)N                | C13284947 | -13.34 | -3.22 | -15.7  | 4.93  | 0.66  |
| 3925 | c1cnc(cc1C(F)F)F                 | C19616079 | -13.34 | 0.31  | -15.83 | 3.93  | -1.75 |
| 3926 | Cc1ncc(o1)C=O                    | C20443735 | -13.34 | -2.34 | -16.55 | 5.53  | 0.02  |
| 3927 | c1ccc(c1)CCO)O                   | C00406927 | -13.33 | -2.26 | -14.83 | 3.72  | 0.03  |
| 3928 | Cn1cc(nc1)[N+](=O)[O-]           | C01063081 | -13.33 | -3.47 | -16.77 | 11.18 | -4.27 |
| 3929 | c1c2c(ncnc2on1)N                 | C01295887 | -13.33 | -1.76 | -18.47 | 6.84  | 0.05  |
| 3930 | COc1ccc(c1)F                     | C02382629 | -13.33 | -2.57 | -13.02 | 3.55  | -1.29 |
| 3931 | Cn1cc(c1)N)Cl                    | C02537812 | -13.33 | -3.08 | -13.89 | 4.69  | -1.05 |
| 3932 | C=CCn1c(nnn1)[S-]                | C02556298 | -13.33 | -1.88 | -15.66 | 5.39  | -1.18 |
| 3933 | Cc1ccn(n1)C(=O)N                 | C02566285 | -13.33 | -4.24 | -14.76 | 5.79  | -0.12 |
| 3934 | CNc1cccc(c1)F                    | C02583443 | -13.33 | -1.9  | -11.5  | 2.71  | -2.63 |
| 3935 | CON/C=N/O                        | C04002012 | -13.33 | -3.49 | -12.51 | 3.74  | -1.07 |
| 3936 | c1c(cn1)CCO)[N+](=O)[O-]         | C04290899 | -13.33 | -3.5  | -15.94 | 6.53  | -0.41 |
| 3937 | c1ccc(cc1)C(=O)NO                | C04701351 | -13.33 | -1.67 | -17.6  | 4.39  | 1.55  |
| 3938 | c1cc(occ1/C=N/O)Br               | C06888997 | -13.33 | -4.06 | -13.54 | 4.14  | 0.12  |
| 3939 | CN/C=C/C(=O)C(F)F                | C12668624 | -13.33 | -2.47 | -13.46 | 4.46  | -1.87 |
| 3940 | CNC(=O)Nc1cccc1F                 | C00039688 | -13.32 | -0.13 | -17.76 | 6.31  | -1.74 |
| 3941 | c1cc(cnc1)CCO                    | C00161624 | -13.32 | -2.13 | -14.6  | 3.91  | -0.5  |
| 3942 | c1ccc(c1)NC(=S)NN)F              | C00166666 | -13.32 | 0.9   | -19.49 | 7.86  | -2.6  |
| 3943 | c1cc(c(c1)F)F                    | C00409209 | -13.32 | -2    | -15.02 | 5.09  | -1.39 |
| 3944 | c1c([n-]nc1[N+](=O)[O-])C(=O)N   | C01083683 | -13.32 | -4.15 | -15.46 | 5.88  | 0.41  |
| 3945 | Cc1ccc(cc1O)N                    | C01669677 | -13.32 | -2.67 | -13.68 | 3.25  | -0.22 |
| 3946 | c1ccc(c1)C=O                     | C01729594 | -13.32 | -2.52 | -15.66 | 7.74  | -2.88 |
| 3947 | CCOC(=O)OCC=C                    | C02564164 | -13.32 | -0.63 | -13.57 | 3.28  | -2.39 |
| 3948 | c1cc2cc[nH]c2c(c1)F              | C02572395 | -13.32 | -1.65 | -14.97 | 3.98  | -0.68 |
| 3949 | Cn1ccnc1Cl                       | C02577856 | -13.32 | -1.52 | -13.85 | 4.83  | -2.78 |
| 3950 | CCCc1ccno1                       | C02643992 | -13.32 | -1.06 | -12.36 | 3.27  | -3.17 |
| 3951 | c1c(cc(c1F)Br)F                  | C04290728 | -13.32 | 0.43  | -17.28 | 3.38  | 0.15  |
| 3952 | C1C=C[C@H]([C@H]1N=O)Cl          | C05004379 | -13.32 | -1.77 | -11.97 | 2.22  | -1.8  |
| 3953 | c1cc(c2c1)C(F)cc[nH]2)F          | C08698088 | -13.32 | -0.42 | -14.14 | 4.72  | -3.48 |
| 3954 | c1cc2c(ncnn2c1)N                 | C08764136 | -13.32 | -3.57 | -14.05 | 6.62  | -2.32 |
| 3955 | c1cc(oc1)CCC(=O)Cl               | C20252760 | -13.32 | -1.08 | -12.69 | 3.88  | -3.44 |
| 3956 | c1cnccc1CC(F)F                   | C30714911 | -13.32 | -0.92 | -13.23 | 4.11  | -3.28 |

|      |                                    |           |        |       |        |      |       |
|------|------------------------------------|-----------|--------|-------|--------|------|-------|
| 3957 | c1cc(cc(c1)C)C#N                   | C00404318 | -13.31 | -1.04 | -12.06 | 3.77 | -3.98 |
| 3958 | c1cc(oc1CO)[N+](=O)[O-]            | C01081206 | -13.31 | -3.49 | -17.5  | 7.95 | -0.28 |
| 3959 | c1cc(ncc1C(F)(F)F)N                | C01390093 | -13.31 | -4.87 | -11.06 | 4.26 | -1.63 |
| 3960 | C1=CC2C=CC1O2                      | C01433325 | -13.31 | -1.11 | -13.1  | 2.8  | -1.9  |
| 3961 | C1=CC(=O)C=CC1=NCl                 | C01555531 | -13.31 | 1.02  | -15.76 | 3.99 | -2.55 |
| 3962 | C1[C@@H]2C=C[C@H]2CC1=O            | C01570417 | -13.31 | -0.53 | -12.47 | 2.88 | -3.18 |
| 3963 | Cc1c(ncn1)Cl                       | C01672435 | -13.31 | -1.34 | -14.13 | 3.76 | -1.6  |
| 3964 | COc1ccncc1                         | C01733140 | -13.31 | -3.27 | -14.32 | 3.64 | 0.64  |
| 3965 | Cc1c(cnn1C)N=C=S                   | C02537535 | -13.31 | -0.14 | -15.26 | 4.88 | -2.79 |
| 3966 | c1c(cc(c1O)F)CBr                   | C02539974 | -13.31 | -2.45 | -13.13 | 4.61 | -2.34 |
| 3967 | C[C@H](C#N)Oc1cccc1                | C11834606 | -13.31 | -2.92 | -13.46 | 5.1  | -2.04 |
| 3968 | Cc1nc[nH]n1                        | C12398213 | -13.31 | -3.27 | -14.26 | 5.99 | -1.77 |
| 3969 | CC(=O)OCCSC(F)(F)F                 | C12618875 | -13.31 | -0.36 | -13.4  | 4.18 | -3.73 |
| 3970 | Cc1c(cccn1)[N+](=O)[O-]            | C13208028 | -13.31 | -1.24 | -14.23 | 5.09 | -2.94 |
| 3971 | c1(nnc(s1)[S-])N                   | C16382868 | -13.31 | -2.83 | -15.99 | 5.54 | -0.03 |
| 3972 | c1cnc2c(n1)[nH]c(=O)[nH]2          | C16931073 | -13.31 | -0.78 | -19.47 | 6.94 | 0.01  |
| 3973 | c1cc(nc(c1F)C(F)F)F                | C30714852 | -13.31 | -1.85 | -13.63 | 5.04 | -2.87 |
| 3974 | CCSSCC                             | M1995A004 | -13.31 | -0.34 | -10.22 | 1.62 | -4.36 |
| 3975 | CC(=O)Oc1cccc(c1)O                 | C00002029 | -13.3  | -1.32 | -16.48 | 6.65 | -2.15 |
| 3976 | c1cc(oc1C=N/O)Br                   | C00375251 | -13.3  | -1.56 | -17.35 | 7.19 | -1.58 |
| 3977 | c1cc(ccc1NC(=O)N2N=N2)F            | C00401685 | -13.3  | 0.23  | -17.48 | 4.63 | -0.68 |
| 3978 | c1ccc(c(c1)O)I                     | C00409257 | -13.3  | -0.43 | -16.58 | 2.6  | 1.11  |
| 3979 | CC(=C)C(=O)C                       | C01608904 | -13.3  | -0.98 | -13.67 | 3.67 | -2.33 |
| 3980 | c1cc([nH]c1)/C=C/O                 | C02519586 | -13.3  | -2.56 | -14.78 | 6.66 | -2.62 |
| 3981 | c1ccc(cc1)CCON                     | C03635304 | -13.3  | -0.16 | -13.47 | 2.71 | -2.38 |
| 3982 | c1c(n[nH]n1)CO                     | C03861563 | -13.3  | -4.42 | -15.09 | 5.87 | 0.34  |
| 3983 | CCOC(=O)[C@H](C(F)(F)F)O           | C04255845 | -13.3  | -2.17 | -13.25 | 3.58 | -1.46 |
| 3984 | CCc1c(c([nH]n1)N)C                 | C04953860 | -13.3  | -2.3  | -14.33 | 4.72 | -1.38 |
| 3985 | C=C([C@H](CO)O)Cl                  | C05426447 | -13.3  | -4.56 | -13.99 | 3.36 | 1.89  |
| 3986 | Cn1c(cnc1[N+](=O)[O-])[N+](=O)[O-] | C05460184 | -13.3  | 0.5   | -15.28 | 3.46 | -1.98 |
| 3987 | CCOC(=O)C(=S)N                     | C05828397 | -13.3  | -2.75 | -13.86 | 3.1  | 0.2   |
| 3988 | c1cc(cnc1)[C@H](CC)O               | C08764125 | -13.3  | -1.44 | -14.94 | 4.4  | -1.33 |
| 3989 | c1ccc2c(c1)[nH]c(n2)/N=N/O         | C13211981 | -13.3  | -3.96 | -15.82 | 9.29 | -2.8  |
| 3990 | c1cc2c(cc1C#N)cn[nH]2              | C14985966 | -13.3  | -0.92 | -15.49 | 5.7  | -2.59 |
| 3991 | c1c(c([nH]n1)N)C#N                 | C18217608 | -13.3  | -5.12 | -15.08 | 7.19 | -0.29 |
| 3992 | COc(=O)Cc1cncs1                    | C20272676 | -13.3  | -0.92 | -16.82 | 6.9  | -2.46 |
| 3993 | c1c(cnc1)Cl)N                      | C20357595 | -13.3  | -4.48 | -15.83 | 7.16 | -0.15 |
| 3994 | CCc1ccc[nH+]c1N                    | C21985766 | -13.3  | -0.78 | -13.4  | 3.71 | -2.82 |
| 3995 | c1cc2c(cc1N)cn[nH]2                | C00152290 | -13.29 | -2.22 | -14.97 | 4.56 | -0.65 |
| 3996 | Cc1ccc(nn1)Cl                      | C00152979 | -13.29 | -1.4  | -15.28 | 5.54 | -2.15 |
| 3997 | c1cc(cc(c1)OC(F)(F)F)N             | C00164780 | -13.29 | -0.39 | -13.71 | 2.49 | -1.68 |
| 3998 | C1C2c2([nH]nc2O)C1                 | C00270745 | -13.29 | -4.46 | -15.85 | 5.63 | 1.39  |
| 3999 | COc(=O)CCc1cccc1                   | C00396313 | -13.29 | -0.91 | -14.38 | 4.06 | -2.07 |
| 4000 | CC(=O)C(=O)C                       | C01532732 | -13.29 | -1    | -13.54 | 2.64 | -1.39 |
| 4001 | Cc1ccc[nH]1                        | C01574399 | -13.29 | -0.95 | -14.62 | 2.67 | -0.39 |
| 4002 | CCOC(=O)C                          | C01592691 | -13.29 | -0.83 | -11.69 | 2.01 | -2.78 |
| 4003 | c1c(cnc1)Cl)O                      | C02524877 | -13.29 | 0.47  | -18.62 | 4.05 | 0.81  |
| 4004 | CCc1c(c([nH]n1)C)C                 | C03848382 | -13.29 | -1.85 | -12.98 | 4.2  | -2.65 |
| 4005 | c1cc(cc(c1)F)/C=N/O                | C04582791 | -13.29 | -2    | -15.98 | 5.72 | -1.03 |
| 4006 | COc(=O)c1c(c[nH]n1)N               | C05686979 | -13.29 | -0.77 | -16.99 | 4.36 | 0.11  |
| 4007 | c1c(c(=O)[nH]c(n1)N)CCS            | C08627353 | -13.29 | -3.46 | -15.29 | 5.16 | 0.3   |
| 4008 | c1nc(c(c1)[O-])N(C(F)F)F           | C11919801 | -13.29 | -5.8  | -15.03 | 7.96 | -0.42 |
| 4009 | Cc1cncccc1Br                       | C13283752 | -13.29 | -1.83 | -10.83 | 2.29 | -2.93 |
| 4010 | Cc1cncnc1Cl                        | C15444620 | -13.29 | -2.41 | -14.31 | 5.54 | -2.1  |
| 4011 | c1cc(c(cc1F)F)[C@@H]2CO2           | C19256620 | -13.29 | -1.57 | -11.56 | 2.64 | -2.8  |
| 4012 | c1c(cnc1)NN)I                      | C19872654 | -13.29 | -2.56 | -12.84 | 4.27 | -2.16 |
| 4013 | COc1ccc2c(c1)non2                  | C00161239 | -13.28 | -3.32 | -13.29 | 5.34 | -2.01 |
| 4014 | c1cc(ncc1)Cl)Br                    | C00330764 | -13.28 | -1.31 | -14.79 | 2.29 | 0.53  |
| 4015 | c12c(sc(c1O)s1)sc(=O)s2            | C01044327 | -13.28 | -0.42 | -11.15 | 1.54 | -3.25 |
| 4016 | c1c(nns1)C(=O)NO                   | C01403330 | -13.28 | -4.8  | -17.61 | 7.71 | 1.42  |
| 4017 | CCOC(=O)CCl                        | C01648258 | -13.28 | -0.96 | -13.84 | 4.35 | -2.83 |
| 4018 | CCCCC(=O)Cl                        | C01850951 | -13.28 | -0.6  | -12.17 | 2.65 | -3.16 |
| 4019 | C/C=C1/CCOC1=O                     | C02034939 | -13.28 | -1.11 | -15.54 | 6.37 | -2.99 |
| 4020 | C1[C@H]([C@@H]1F)C(=O)Cl           | C02540316 | -13.28 | 0.29  | -13.62 | 2.68 | -2.63 |
| 4021 | C/C(=N)Nc1[nH]ncn1/[N+](=O)[O-]    | C04401865 | -13.28 | -1.78 | -13.09 | 6.24 | -4.65 |
| 4022 | C#CCO/N=C/c1c(non1)N)N             | C04418888 | -13.28 | -1.14 | -15.74 | 3.93 | -0.33 |
| 4023 | C1C=C[C@H]([C@H]1N=O)Cl            | C05004375 | -13.28 | -1.48 | -12.3  | 2.17 | -1.68 |
| 4024 | CNn1cncn1                          | C05353904 | -13.28 | -1.49 | -16.48 | 6.9  | -2.21 |
| 4025 | c1[nH]c(c1n1)[N+](=O)[O-]S         | C08615692 | -13.28 | -4.14 | -15.84 | 9.52 | -2.82 |
| 4026 | Cc1cnc(nc1)Cl                      | C14982419 | -13.28 | -2.02 | -13.53 | 4.61 | -2.35 |
| 4027 | Cc1ccc(o1)N=C=O                    | C20252600 | -13.28 | -1.72 | -14.01 | 2.76 | -0.31 |
| 4028 | C1CCC(C1)SCC#N                     | C32667676 | -13.28 | -0.45 | -13.28 | 4.92 | -4.47 |
| 4029 | CC(=O)/C=C/c1cccc1                 | C00154592 | -13.27 | 0.75  | -15.56 | 5.04 | -3.5  |
| 4030 | CSc1cncn1                          | C00156980 | -13.27 | -0.9  | -14.27 | 3.52 | -1.62 |
| 4031 | CCCC(=O)C(F)(F)F                   | C01675527 | -13.27 | -0.71 | -12.04 | 2.49 | -3    |
| 4032 | CCOC(=O)CN=C=O                     | C01693377 | -13.27 | -1.68 | -17.06 | 5.58 | -0.11 |
| 4033 | c1(c(c(=O)c(=O)c(=O)c1=O)[O-])O    | C03861035 | -13.27 | -4.61 | -14.38 | 6.44 | -0.72 |
| 4034 | Cc1c(c([nH]1)[N+](=O)[O-])Cl       | C04243745 | -13.27 | -1.17 | -12.25 | 3.13 | -2.97 |
| 4035 | c1[nH]c(c1n1)Br)Cl                 | C04771900 | -13.27 | -3.43 | -12.54 | 5.05 | -2.35 |
| 4036 | c1ccc(cc1)CN/C(=N)C#N)N            | C05840054 | -13.27 | 2.53  | -15.68 | 5.22 | -5.34 |
| 4037 | Cn1cnc1C#C                         | C06553981 | -13.27 | -0.98 | -14.81 | 6.15 | -3.63 |
| 4038 | C1C(=O)N(C(=O)S1)CCC#N             | C08804380 | -13.27 | 0.26  | -19.02 | 7.63 | -2.14 |
| 4039 | Cc1cccnc1CCl                       | C14807832 | -13.27 | 0.41  | -13.73 | 3.55 | -3.5  |
| 4040 | c1cnc(cc1F)C#N                     | C14982526 | -13.27 | 0.42  | -15.92 | 4.57 | -2.34 |
| 4041 | c1cc(ncc1O)C#N                     | C14984854 | -13.27 | -0.39 | -18.82 | 6.05 | -0.12 |
| 4042 | C/C=C/C=C/C=N/O                    | C15274129 | -13.27 | -1.07 | -14.41 | 3.69 | -1.48 |
| 4043 | c1cc(c(c1)Br)N)O                   | C16125294 | -13.27 | -2.83 | -12.95 | 2.74 | -0.23 |
| 4044 | Cn1c(nnc1S)N                       | C18043370 | -13.27 | -4.03 | -14.45 | 7.52 | -2.32 |
| 4045 | c1cc(cc(c1)F)Cn2c(ccn2)N           | C19090082 | -13.27 | 0.62  | -15.36 | 5.3  | -3.83 |
| 4046 | c1cnc(cc1Cl)CCl                    | C21985727 | -13.27 | -1.74 | -10.98 | 2.89 | -3.45 |

|      |                                  |           |        |       |        |       |       |
|------|----------------------------------|-----------|--------|-------|--------|-------|-------|
| 4047 | C#CCOC1cncc(n1)Cl                | C26515734 | -13.27 | -1.47 | -14.54 | 3.85  | -1.11 |
| 4048 | c1cnc(c1)C(=O)N                  | C00388048 | -13.26 | -4.21 | -15.3  | 6.01  | 0.24  |
| 4049 | C=CC(=O)OCc1ccco1                | C01608911 | -13.26 | 1.79  | -16.8  | 5.46  | -3.71 |
| 4050 | c1cc(sc1N)SN                     | C01737341 | -13.26 | -1.35 | -14.91 | 3.02  | -0.02 |
| 4051 | CO/N=C/(c1c(non1)N)Cl            | C02272193 | -13.26 | 0.86  | -17    | 3.59  | -0.72 |
| 4052 | c1ccc(cc1)N/C(=N/[N+](=O)[O-])/N | C06578372 | -13.26 | 0.18  | -14.32 | 4.62  | -3.74 |
| 4053 | Cc1ccc(s1)[N+](=O)[O-]           | C15784486 | -13.26 | -2.38 | -12.88 | 5.86  | -3.85 |
| 4054 | C/C=C/CNc1ccccc1                 | C17322283 | -13.26 | -0.65 | -9.91  | 1.65  | -4.35 |
| 4055 | CC(=O)c1cc(ccc1N)F               | C21298704 | -13.26 | -2.52 | -12.52 | 3.99  | -2.21 |
| 4056 | Cc1c(cc(c1F)F)C#N)F              | C21299376 | -13.26 | 1.82  | -14.2  | 3.36  | -4.23 |
| 4057 | COC(=O)Cc1ccc(cc1)O              | C00395674 | -13.25 | -1.29 | -16.39 | 6.73  | -2.3  |
| 4058 | C[C@H](C(=O)C)Br                 | C02031007 | -13.25 | -1.13 | -12.25 | 2.55  | -2.42 |
| 4059 | Cc1ccc(cc1)CC#N                  | C02242671 | -13.25 | -1.89 | -14.56 | 5.62  | -2.42 |
| 4060 | c1c(c(cc(c1Br)F)F)N              | C02580921 | -13.25 | -0.24 | -15.31 | 2.21  | 0.09  |
| 4061 | C1CCN(C1)/C(=N/O)/N              | C04203681 | -13.25 | -4.33 | -14.36 | 6.43  | -0.98 |
| 4062 | CCCC(=N)N)N                      | C04203854 | -13.25 | -2.66 | -13.01 | 2.96  | -0.54 |
| 4063 | CC(=O)C(=NH+)N)N                 | C04203887 | -13.25 | -4.28 | -15.33 | 3.55  | 2.82  |
| 4064 | Cc1cc(sc1)C=O                    | C04208894 | -13.25 | -1.54 | -13.79 | 5.02  | -2.93 |
| 4065 | c1cc(cnc1)NC(=O)C(F)F)F          | C13208177 | -13.25 | -3.38 | -12.8  | 4.63  | -1.7  |
| 4066 | C/C=C/C=CO                       | C13546467 | -13.25 | -2.03 | -12.84 | 2.57  | -0.96 |
| 4067 | c1c(ccc1O)C(=O)N=[N+]=[N-]       | C13764320 | -13.25 | 1     | -21.57 | 4.34  | 2.99  |
| 4068 | Cc1cc2cc[nH]c2nc1                | C14401061 | -13.25 | -1.25 | -13.87 | 5.26  | -3.38 |
| 4069 | c1[nH]c(c(n1)C(=S)N)N            | C16955122 | -13.25 | -6.47 | -15.55 | 9.07  | -0.3  |
| 4070 | c1c(nc(s1)N)C(=O)N               | C17005372 | -13.25 | -2.2  | -17.27 | 4.73  | 1.5   |
| 4071 | c1c2c(n[nH]1)nnnc2[O-]           | C17025473 | -13.25 | -4.22 | -18.58 | 6.73  | 2.82  |
| 4072 | C/(C=C)Br)Br)N                   | C17299574 | -13.25 | -0.01 | -13.63 | 1.05  | -0.66 |
| 4073 | COc1cc(cnc1)Cl                   | C19872631 | -13.25 | -2.45 | -11.5  | 2.66  | -1.96 |
| 4074 | C1CC(=C[C@H]1O)Br                | C21994683 | -13.25 | -1.45 | -13.7  | 2.89  | -0.99 |
| 4075 | c1cc(c(c1O)N)C#N                 | C26422640 | -13.25 | -4.56 | -15.31 | 6.51  | 0.11  |
| 4076 | CC(=O)n1cc(c(=O)[nH]c1=O)F       | C00007886 | -13.24 | 0.28  | -18.14 | 5.09  | -0.47 |
| 4077 | c1ccc(c1)CCO)F                   | C00407056 | -13.24 | 0.02  | -14.75 | 3.57  | -2.08 |
| 4078 | c1cc(c(cc1Br)F)O                 | C00409378 | -13.24 | -0.77 | -16.16 | 3.04  | 0.65  |
| 4079 | C/C=C/C(=O)OC=C                  | C01680772 | -13.24 | -0.73 | -12.75 | 3.68  | -3.44 |
| 4080 | CC(=O)c1cc(ccc1F)F               | C01995083 | -13.24 | 0.78  | -17.55 | 5.84  | -2.31 |
| 4081 | COC(=O)C(C(F)F)F)F               | C02040697 | -13.24 | -1.39 | -11.2  | 2     | -2.66 |
| 4082 | c1cnn2c(nnc2n1)N                 | C02289036 | -13.24 | -5.2  | -18.11 | 13.47 | -3.4  |
| 4083 | Cn1ccccc1C(=O)Cl                 | C02389443 | -13.24 | 1.7   | -16.8  | 4.94  | -3.07 |
| 4084 | c1cc2c([nH]c(=O)[nH]2)nc1        | C11919566 | -13.24 | -7.38 | -18.2  | 10.86 | 1.47  |
| 4085 | c1cc2c(c1[nH]c2nc1)N             | C14984902 | -13.24 | -1.23 | -15.76 | 5.04  | -1.29 |
| 4086 | C1CSC/C1=N/O                     | C15022738 | -13.24 | -1.66 | -14.66 | 3.78  | -0.7  |
| 4087 | c1cnc(c1)C(=O)N=[N+]=[N-]        | C15785118 | -13.24 | 1.49  | -20.57 | 4.98  | 0.85  |
| 4088 | Cc1cc(nc1)F)F                    | C16054434 | -13.24 | -1.77 | -13.87 | 4.73  | -2.33 |
| 4089 | Cc1cnc(n1)N)C                    | C16887557 | -13.24 | -2.66 | -13.89 | 5.13  | -1.82 |
| 4090 | Cc1cnc(c1)CCl                    | C21985734 | -13.24 | -1.46 | -11.68 | 3.49  | -3.59 |
| 4091 | c1cc(ccc1/C=C/[N+](=O)[O-])F     | C00101337 | -13.23 | -0.55 | -15.67 | 5.41  | -2.42 |
| 4092 | Cc1c(noc1)N)C                    | C00164496 | -13.23 | -3.53 | -14.1  | 4.59  | -0.19 |
| 4093 | c1cncccc1C(=O)Cl                 | C01586817 | -13.23 | 1.72  | -16.11 | 3.34  | -2.19 |
| 4094 | c1cnn2cnncc2c1N                  | C01674220 | -13.23 | -3.97 | -17.75 | 8.43  | 0.06  |
| 4095 | c1cc(noc1)C(=O)CCl               | C01713556 | -13.23 | -1.62 | -14.54 | 5.85  | -2.91 |
| 4096 | C(CBr)C(=O)Cl                    | C02242609 | -13.23 | -1.57 | -11.42 | 2.33  | -2.57 |
| 4097 | C1CC1C(=O)Cl                     | C02242630 | -13.23 | 0.35  | -13.59 | 2.56  | -2.55 |
| 4098 | C/C=C(C)C(=O)Cl                  | C02570159 | -13.23 | -0.05 | -13.18 | 2.88  | -2.87 |
| 4099 | CCN(C(=O)N)N=O                   | C04804054 | -13.23 | -1.53 | -16.32 | 3.54  | 1.08  |
| 4100 | COc1cncn1                        | C05526523 | -13.23 | -3.21 | -14.76 | 4.85  | -0.11 |
| 4101 | [H]/N=c1/[nH+]c(ss1)N            | C05783684 | -13.23 | -5.99 | -15.37 | 5.58  | 2.55  |
| 4102 | c1cc(c(cc1Br)O)F                 | C06091818 | -13.23 | -1.1  | -15.53 | 2.79  | 0.6   |
| 4103 | c1cc2c(c1)F(c[nH]2)N             | C06855063 | -13.23 | -4.4  | -15.64 | 8.36  | -1.55 |
| 4104 | Cc1ccc(=O)[nH]c1                 | C08698077 | -13.23 | -2.81 | -15.79 | 4.7   | 0.67  |
| 4105 | C/C=C/C=C=O                      | C13540492 | -13.23 | -1.1  | -13.97 | 4.67  | -2.83 |
| 4106 | c1c(cnc(=O)[nH]1)Cl              | C15721423 | -13.23 | -2.61 | -17.05 | 4.14  | 2.29  |
| 4107 | C=CCc1ccccc1                     | C19801720 | -13.23 | 0.02  | -12.7  | 3.08  | -3.62 |
| 4108 | c1c(c(nn1CC(F)F)N)Br             | C20348914 | -13.23 | -4.49 | -12.14 | 5.33  | -1.94 |
| 4109 | c1cc(ncc1O)C(F)F)F               | C01529156 | -13.22 | -1.27 | -15.96 | 4.66  | -0.65 |
| 4110 | c1cc(ccc1NO)Cl                   | C01659910 | -13.22 | -4.13 | -14.24 | 4.04  | 1.11  |
| 4111 | C1[C@H](C=C1)CC=O                | C01709947 | -13.22 | -0.77 | -14.75 | 3.49  | -1.19 |
| 4112 | c1c(c(n1)CO)Cl                   | C02538866 | -13.22 | -2.48 | -15.71 | 4.41  | 0.55  |
| 4113 | CSc1nc(sn1)NN                    | C16928839 | -13.22 | -1.14 | -16.52 | 5.02  | -0.57 |
| 4114 | CSc1cccc(c1)O                    | C29753674 | -13.22 | -0.27 | -15.58 | 4.67  | -2.04 |
| 4115 | c1cc(c(cc1NN)Cl)F                | C00153199 | -13.21 | -2.49 | -12.31 | 3.5   | -1.91 |
| 4116 | c1ccc(c1)C=O)F                   | C00157161 | -13.21 | -2.26 | -15.48 | 7.69  | -3.16 |
| 4117 | COC(=O)C(C)Cl                    | C01641200 | -13.21 | -0.64 | -13.2  | 3.16  | -2.53 |
| 4118 | COC(=O)CSC#N                     | C01672999 | -13.21 | -0.21 | -15.59 | 5.16  | -2.57 |
| 4119 | Cc1nc(cs1)C(=O)N                 | C02559290 | -13.21 | -2.91 | -16.66 | 5.84  | 0.51  |
| 4120 | Cn1c(c(cn1)Cl)C=O                | C02565634 | -13.21 | -0.13 | -14.88 | 3.72  | -1.93 |
| 4121 | c1cc(sc1)Cn2c(ccn2)N             | C03399149 | -13.21 | 0.23  | -15.32 | 4.98  | -3.1  |
| 4122 | c1cncoc1CC#N                     | C04206813 | -13.21 | -1.92 | -17.15 | 8.29  | -2.42 |
| 4123 | CCN(C(=O)OCC)N=O                 | C04536311 | -13.21 | -1.86 | -13.66 | 3.42  | -1.11 |
| 4124 | c1c[nH]c(=O)cc1Br                | C05037781 | -13.21 | -4.84 | -14.72 | 7.91  | -1.56 |
| 4125 | COc1cncn1                        | C05285605 | -13.21 | -1.95 | -15.29 | 5.82  | -1.8  |
| 4126 | Cc1cnn2c(c1)nncc2N               | C08616270 | -13.21 | -5.13 | -9.14  | 5.62  | -4.56 |
| 4127 | Cc1c(ccc(c1F)C)N)F               | C12359161 | -13.21 | -1.92 | -12.32 | 4.2   | -3.18 |
| 4128 | Cn1c(c2c(n1)CCC2)N               | C12504958 | -13.21 | -4.05 | -12.63 | 5.78  | -2.32 |
| 4129 | c1cc(c(c1O)C=O)F)F               | C15444596 | -13.21 | -1.26 | -14.8  | 5.02  | -2.16 |
| 4130 | CCn1cncn1[N+](=O)[O-]            | C15782793 | -13.21 | -2.66 | -14.18 | 8.83  | -5.2  |
| 4131 | c1([n+](=O)[O-])c(n1)N)N         | C20330021 | -13.21 | -5.49 | -19.08 | 11.94 | -0.58 |
| 4132 | c1cc2c(cc1)Fns2                  | C00071450 | -13.2  | -2.7  | -14.84 | 3.43  | 0.91  |
| 4133 | c1cc(c(cc1Br)F)N                 | C00152960 | -13.2  | -0.75 | -15.49 | 2.34  | 0.7   |
| 4134 | C[C@H](c1cncn1)O                 | C00391917 | -13.2  | -2.15 | -14.2  | 3.91  | -0.75 |
| 4135 | CC(=O)Sc1ccccc1                  | C00406910 | -13.2  | -0.75 | -16.05 | 4.46  | -0.85 |
| 4136 | Cc1c(c(nc1F)F)F)F                | C00409327 | -13.2  | -1.44 | -11.28 | 1.94  | -2.42 |

|      |                                  |           |        |       |        |       |       |
|------|----------------------------------|-----------|--------|-------|--------|-------|-------|
| 4137 | c1(c(snn1C)C(=O)N                | C01417140 | -13.2  | 0.5   | -18.35 | 3.38  | 1.26  |
| 4138 | CCO[C@H]1C(=O)C(=O)C(=O)O1       | C01653813 | -13.2  | 0.38  | -17.6  | 5     | -0.98 |
| 4139 | c1cc(ccc1CCC)O                   | C01765697 | -13.2  | -0.97 | -15.7  | 3.01  | 0.46  |
| 4140 | C[C@H](CC=C)O                    | C02003063 | -13.2  | -0.71 | -14.22 | 1.48  | 0.24  |
| 4141 | c1cc(cc(c1)O)/C=C/[N+](=O)[O-]   | C02244055 | -13.2  | -1.07 | -17.77 | 6.02  | -0.39 |
| 4142 | c1c(c(cc(c1F)Br)F)N              | C02575681 | -13.2  | 0.62  | -16.31 | 2.32  | 0.16  |
| 4143 | C1CC(=COC)C=O                    | C03884197 | -13.2  | -1.33 | -16.13 | 6.11  | -1.85 |
| 4144 | CN(C=O)N=O                       | C04726478 | -13.2  | -1.68 | -13.59 | 2.9   | -0.83 |
| 4145 | c1c(c(=O)[nH]cn1)I               | C05294982 | -13.2  | -3.89 | -15.68 | 8.27  | -1.9  |
| 4146 | C[C@H]1C(=O)N=C(S1)N             | C05529024 | -13.2  | -1.38 | -14.56 | 3.16  | -0.42 |
| 4147 | c1cc(c(n1))                      | C12958172 | -13.2  | -1.82 | -14.49 | 3.49  | -0.37 |
| 4148 | COC(=O)C=C                       | C17061970 | -13.2  | -4.29 | -14.99 | 6.44  | -0.37 |
| 4149 | c1cc(c(c(c1F)C#N)F)F             | C00155264 | -13.19 | 1.86  | -17.75 | 6.17  | -3.47 |
| 4150 | C1CCC(C1)N=C=S                   | C00167186 | -13.19 | 0.25  | -11.57 | 1.27  | -3.13 |
| 4151 | c1ccn2c(c1)ncn2                  | C01657314 | -13.19 | -2.91 | -17.41 | 7.99  | -0.86 |
| 4152 | CCC[N+](=O)[O-]                  | C01693429 | -13.19 | -1.02 | -13.16 | 3.39  | -2.41 |
| 4153 | C/C=C(C)/[C@H](C)O               | C01730154 | -13.19 | -1.15 | -12.83 | 1.98  | -1.19 |
| 4154 | C1CSCS1                          | C01733027 | -13.19 | -0.77 | -11.87 | 2.3   | -2.85 |
| 4155 | CSc1nc(ns1)N                     | C02569836 | -13.19 | -3.05 | -13.98 | 5.22  | -1.38 |
| 4156 | CC(=C)C(=O)OCCF                  | C02584300 | -13.19 | -1.54 | -13.14 | 4.91  | -3.41 |
| 4157 | c1cc(oc1)C=O                     | C03861345 | -13.19 | -2.04 | -16.25 | 7.23  | -2.13 |
| 4158 | c1cc2c(c(c1)F)nc[nH]2            | C05479669 | -13.19 | -3.41 | -15.06 | 8.58  | -3.29 |
| 4159 | c1ccn(c1)SC/C(=N/O)/N            | C08552692 | -13.19 | 0.34  | -21.93 | 6.07  | 2.33  |
| 4160 | C/C(=NH+)(C#N)/N                 | C12480368 | -13.19 | -5.18 | -12.7  | 7.09  | -2.4  |
| 4161 | c1c(cnc2c1nc[nH]2)O              | C18544047 | -13.19 | -4.21 | -16.75 | 8.27  | -0.5  |
| 4162 | C[C@H](c1ccc1)Cl                 | C32005370 | -13.19 | -1.23 | -11.46 | 2.91  | -3.41 |
| 4163 | COC1cccc1                        | C00391193 | -13.18 | -0.71 | -15.02 | 3.65  | -1.09 |
| 4164 | CN1C(=O)C(=O)C(=O)NC1=O          | C01760254 | -13.18 | -0.3  | -18.26 | 5.1   | 0.27  |
| 4165 | c1c(c(n1)CC=O)Cl                 | C02537470 | -13.18 | -3.03 | -15.04 | 7.03  | -2.15 |
| 4166 | c1ncn(c1)C(=O)n2cncn2            | C02584455 | -13.18 | -1.33 | -17.06 | 6.81  | -1.6  |
| 4167 | c1ccc(cc1)OCCS                   | C04522230 | -13.18 | -2.25 | -12.81 | 2.03  | -0.15 |
| 4168 | c1c(ncn1)O                       | C04566580 | -13.18 | -3.64 | -14.79 | 3.95  | 1.29  |
| 4169 | c1cc2c(cc1Cl)cn[nH]2             | C04876880 | -13.18 | -0.98 | -13.08 | 3.58  | -2.7  |
| 4170 | c1ccc(cc1C)F(F)F                 | C08764120 | -13.18 | -3    | -11.03 | 3.34  | -2.5  |
| 4171 | c1cc2ncnnc2cc1Br                 | C12471795 | -13.18 | -3.59 | -10.76 | 5.28  | -4.1  |
| 4172 | c1cc(oc1C(=S)N)Br                | C12810442 | -13.18 | -2.31 | -14.79 | 5.92  | -2.01 |
| 4173 | c1[nH]c(nn1)N/C(=NH+)[c2[n-]cnn2 | C16981432 | -13.18 | 0.46  | -15.59 | 8.16  | -6.22 |
| 4174 | C(#N)/C=C(\C#N)/F                | C17174232 | -13.18 | -0.03 | -14.02 | 3.12  | -2.26 |
| 4175 | c1c2c([nH]n1)C=CC2=O             | C20216475 | -13.18 | -4.56 | -14.53 | 7.77  | -1.86 |
| 4176 | c1ccc2c(c1)[nH]c(n2)Cl           | C00152282 | -13.17 | -2.9  | -15.88 | 4.88  | 0.73  |
| 4177 | c1cc(c(cc1C#N)O)O                | C00157092 | -13.17 | -1.3  | -18.22 | 6.24  | 0.11  |
| 4178 | c1cc(oc1)CNC(=O)N                | C00162619 | -13.17 | -0.14 | -20.83 | 6.87  | 0.93  |
| 4179 | c1cc(ccc1NC=O)F                  | C00394988 | -13.17 | -2.85 | -16.71 | 7.27  | -0.88 |
| 4180 | c1cccnc1)I                       | C00404222 | -13.17 | -0.66 | -16.27 | 3.32  | 0.44  |
| 4181 | CC[C@H](c1ccc1)O                 | C01481898 | -13.17 | -1.14 | -11.56 | 2.32  | -2.78 |
| 4182 | Cc1cc(on1)N                      | C01604212 | -13.17 | -3.65 | -14.28 | 4.4   | 0.35  |
| 4183 | c1cncn1                          | C01692439 | -13.17 | -1.54 | -14.6  | 3.69  | -0.72 |
| 4184 | c1cc(sc1C(=O)Cl)Cl               | C02168777 | -13.17 | -0.91 | -14.52 | 2.38  | -0.13 |
| 4185 | C1(=S)C(=S)SC(=S)S1              | C02382900 | -13.17 | -0.45 | -9.03  | 0.53  | -4.22 |
| 4186 | C=CC(=O)OCC(C(F)F)F              | C02584317 | -13.17 | 0.3   | -15.1  | 5.71  | -4.07 |
| 4187 | C[C@@H](C(=O)Cl)Cl               | C04262242 | -13.17 | 0.03  | -13.09 | 2.21  | -2.32 |
| 4188 | c1cccnc1)CN[NH3+]                | C19172755 | -13.17 | -1.24 | -15.68 | 3.83  | -0.39 |
| 4189 | CC(=O)C1ccsc1                    | C20252681 | -13.17 | -1.43 | -13.61 | 5.51  | -3.64 |
| 4190 | c1cc(cc2c1cc[nH]2)F              | C00163312 | -13.16 | -3.65 | -9.94  | 3.85  | -3.42 |
| 4191 | CCOC(=O)C=C                      | C00403287 | -13.16 | -0.34 | -15.66 | 4.88  | -2.04 |
| 4192 | c1cc2[nH]cnc2c(=O)c1             | C01566204 | -13.16 | -2.6  | -18.52 | 7.77  | 0.18  |
| 4193 | COC(=O)CBr                       | C01641052 | -13.16 | -0.88 | -14.2  | 4.1   | -2.19 |
| 4194 | c1cc(cc(c1)OC(F)F)N              | C02560125 | -13.16 | 0.48  | -16.68 | 4.56  | -1.51 |
| 4195 | C(CCl)[N+](=O)[O-]               | C05113366 | -13.16 | 0.12  | -13.96 | 2.99  | -2.31 |
| 4196 | CC[C@H](C)ON=O                   | C06129972 | -13.16 | -1.06 | -11.81 | 2.49  | -2.78 |
| 4197 | c1nnc(s1)NC(=S)N                 | C06599630 | -13.16 | -4.03 | -16.17 | 7.36  | -0.32 |
| 4198 | c1c[nH]c2c1c(=O)nc[nH]2          | C08638189 | -13.16 | -4.68 | -16.24 | 7.22  | 0.55  |
| 4199 | CCc1nnc(s1)N                     | C17744087 | -13.16 | -1.93 | -15.72 | 5.71  | -1.22 |
| 4200 | c1(=O)c(n[nH]c(=O)[nH]1)NN       | C18189881 | -13.16 | -4.64 | -18.66 | 6.98  | 3.16  |
| 4201 | c1cc2c(c(c1)F)c(no2)N            | C19869410 | -13.16 | -4.96 | -13.06 | 7.1   | -2.23 |
| 4202 | c1csc(n1)NCC(F)F                 | C21799605 | -13.16 | -3.16 | -11.09 | 3.53  | -2.44 |
| 4203 | C=Cn1cnn1                        | C22000920 | -13.16 | -2.6  | -17.39 | 8.6   | -1.78 |
| 4204 | c1csc(n1)C(=O)N                  | C22113384 | -13.16 | -3.47 | -17.26 | 6.4   | 1.16  |
| 4205 | Cc1ccc(o1)c2cc[nH]n2             | C32501645 | -13.16 | 1.22  | -17.44 | 5.82  | -2.76 |
| 4206 | c1c(onc2c1[nH]nc2)Br             | C32915118 | -13.16 | -0.23 | -15.9  | 4.45  | -1.49 |
| 4207 | c1cc(ncc1C=O)Cl                  | C00169497 | -13.15 | -1.62 | -14.81 | 5.49  | -2.21 |
| 4208 | Cc1ccc(c1N)O                     | C00389589 | -13.15 | -4.17 | -11.82 | 3.09  | -0.25 |
| 4209 | c1cc(c2cn[nH]c2c1N)F             | C01404079 | -13.15 | -3.97 | -13.02 | 4.65  | -0.81 |
| 4210 | C/C=C(\C=O)/Cl                   | C02043284 | -13.15 | -1.81 | -14.79 | 5.68  | -2.24 |
| 4211 | Cc1ccc(c(c1)F)C#N                | C02243215 | -13.15 | 1.81  | -17.21 | 4.98  | -2.74 |
| 4212 | Cc1ccc(c(c1)F)CC#N               | C02243232 | -13.15 | -0.2  | -14.49 | 6.35  | -4.8  |
| 4213 | c1cc(c(nc1)[N+](=O)[O-])F        | C02598978 | -13.15 | -3.88 | -16.04 | 10.23 | -3.46 |
| 4214 | C1C(=NC(=[NH2+])S1)N             | C08649581 | -13.15 | -5.65 | -15.58 | 8.13  | -0.05 |
| 4215 | c1cc(c(=O)[nH]c1)[O-]            | C12243851 | -13.15 | -4.2  | -18.01 | 8.76  | 0.29  |
| 4216 | [H]/N=C(\CCl)/OCC                | C17300981 | -13.15 | -1.74 | -13.79 | 2.54  | -0.15 |
| 4217 | Cc1c([nH]c(=S)nn1)[O-]           | C18153959 | -13.15 | -2.05 | -16.16 | 5.82  | -0.75 |
| 4218 | CC(=O)C(=O)[C@H](S)[S-]          | C20231292 | -13.15 | 0.13  | -14.37 | 2.96  | -1.87 |
| 4219 | c1c(oc(n1)N)C(F)F                | C20357591 | -13.15 | -3.26 | -16.36 | 5.32  | 1.15  |
| 4220 | COC1ccsn1                        | C26506541 | -13.15 | -0.48 | -16.25 | 3.8   | -0.22 |
| 4221 | c1cc(cc(c1)F)C=O                 | C00157155 | -13.14 | -2.59 | -13.93 | 6.56  | -3.18 |
| 4222 | c1ccc(cc1)OC(F)F                 | C00167127 | -13.14 | -0.25 | -12.78 | 2.05  | -2.15 |
| 4223 | c1ccc(c(c1)N+)(=O)[O-]Cl         | C00331636 | -13.14 | -2.74 | -12.8  | 6.5   | -4.1  |
| 4224 | CC(C)SC(=[NH2+])N                | C03806248 | -13.14 | -1.75 | -12.2  | 1.89  | -1.08 |
| 4225 | c1c([nH]c(=O)[nH]c1=O)NN=O       | C04768985 | -13.14 | -3.36 | -19.97 | 6.91  | 3.27  |
| 4226 | c1c2c(c(n1)N)n[n-]n2             | C13518221 | -13.14 | -4.49 | -19.04 | 8.68  | 1.72  |

|      |                                    |           |        |       |        |      |       |
|------|------------------------------------|-----------|--------|-------|--------|------|-------|
| 4227 | [C@H](C(F)F)(OC(F)F)F              | C16082613 | -13.14 | -0.07 | -13.37 | 1.97 | -1.66 |
| 4228 | c1(c(nsn1)Cl)O                     | C16124756 | -13.14 | -2.3  | -16.58 | 3.01 | 2.73  |
| 4229 | Cc1cc(O)[nH]nc1                    | C17108644 | -13.14 | -3.4  | -16.53 | 7.21 | -0.41 |
| 4230 | CC(=O)Cc1ccccc1F                   | C01840990 | -13.13 | -1.39 | -13.39 | 6.05 | -4.41 |
| 4231 | c1cc(O)CCl)C=O                     | C01995255 | -13.13 | -1.23 | -16.68 | 8.09 | -3.3  |
| 4232 | c1ccc(cc1)[C@H](CCl)O              | C02555239 | -13.13 | -1.12 | -12.4  | 3.07 | -2.69 |
| 4233 | C/C=C/C(=O)OCC#N                   | C04933464 | -13.13 | -0.31 | -16.02 | 6.9  | -3.71 |
| 4234 | CCOC1CCnc1                         | C06387813 | -13.13 | -0.11 | -14.2  | 3.47 | -2.3  |
| 4235 | c1csc(n1)NC(=S)[S-]                | C06585049 | -13.13 | -2.04 | -16.62 | 4.21 | 1.32  |
| 4236 | c1cc(Cc1)N)F)C#N                   | C08700947 | -13.13 | -0.69 | -16.06 | 5.72 | -2.1  |
| 4237 | C(#N)c1(c(nc(nn1)N=[N+]=[N-])N     | C13304197 | -13.13 | -4.88 | -12.33 | 3.87 | 0.2   |
| 4238 | c1cc(O)C2COc2)F                    | C15442913 | -13.13 | -1.59 | -12.71 | 5.32 | -4.14 |
| 4239 | c1cc(O)C(F)C/C(=N/O)/N             | C16082805 | -13.13 | -2.4  | -14.2  | 4.74 | -1.27 |
| 4240 | c1c(ncnc1Cl)CCl                    | C26510543 | -13.13 | -2.08 | -11.63 | 3.7  | -3.12 |
| 4241 | C1C[C@H](C=C1)O                    | C01640968 | -13.12 | -1.52 | -12.87 | 1.92 | -0.64 |
| 4242 | CC(C)C(=O)C(=O)C                   | C01663923 | -13.12 | -0.54 | -12.34 | 2.35 | -2.59 |
| 4243 | c1cc(O)C(c1F)C#N)F)O               | C02243358 | -13.12 | 1.43  | -19.07 | 5.99 | -1.48 |
| 4244 | c1cc(O)C(=O)C=O                    | C02560445 | -13.12 | -1.35 | -12.96 | 1.36 | -0.17 |
| 4245 | c1cc(O)C(F)CC(=O)Cl)F              | C02574154 | -13.12 | -2.5  | -12.59 | 4.13 | -2.16 |
| 4246 | CC(C)C(=O)C(=O)C                   | C12953124 | -13.12 | -1.75 | -13.02 | 4.53 | -2.88 |
| 4247 | CC(C)C(=O)C(=O)OCC                 | C13525876 | -13.12 | 0.54  | -13.87 | 3.2  | -2.99 |
| 4248 | c1c(sc(n1)C(F)F)C=O                | C20445797 | -13.12 | -3.46 | -12.78 | 5.21 | -2.09 |
| 4249 | c1cnccc1NN                         | C26459841 | -13.12 | -3    | -18.16 | 7.53 | 0.51  |
| 4250 | CC(=O)CCC(=O)Cl                    | C32016229 | -13.12 | -0.76 | -13.98 | 4.06 | -2.44 |
| 4251 | SCCC1CCCC1                         | M1995A045 | -13.12 | -0.99 | -8.94  | 2.02 | -5.21 |
| 4252 | c1c(O)CC(F)F)CC#N                  | C00164759 | -13.11 | -2.11 | -14.72 | 7.01 | -3.29 |
| 4253 | C/C=C/C)C=O                        | C01577193 | -13.11 | -1.55 | -13.72 | 4.55 | -2.39 |
| 4254 | CCC(=O)C(=O)CC                     | C01602516 | -13.11 | -0.33 | -12.25 | 2.17 | -2.7  |
| 4255 | Cc1cnnc1N)N                        | C01672563 | -13.11 | -3.67 | -16.45 | 6.02 | 0.99  |
| 4256 | CCN(C1CCCC1)N                      | C01845872 | -13.11 | -3.59 | -8.72  | 2.38 | -3.17 |
| 4257 | CC(=O)OCC(=O)C=C                   | C02510854 | -13.11 | 0.41  | -17.06 | 6.9  | -3.37 |
| 4258 | c1cc(O)C(F)C=O)F                   | C02539346 | -13.11 | -1.26 | -14.52 | 5.92 | -3.25 |
| 4259 | [H]N=C\1/N=C(SCS1)N                | C05624795 | -13.11 | -0.41 | -15.69 | 3.15 | -0.17 |
| 4260 | CCc1c(O)[nH]1)C                    | C05634178 | -13.11 | -1.78 | -12.6  | 3.49 | -2.23 |
| 4261 | C/(C=C/C(F)F)F)O                   | C08698332 | -13.11 | -4.07 | -14.01 | 5.31 | -0.34 |
| 4262 | c1cn(O)CC#N                        | C12360633 | -13.11 | -2.11 | -17.34 | 9.7  | -3.35 |
| 4263 | c1cc(O)C(=O)C=N/O                  | C15446206 | -13.11 | 2.06  | -20.41 | 6    | -0.76 |
| 4264 | C/(C=N/O)/N)Br                     | C16082757 | -13.11 | -4.14 | -12.7  | 2.87 | 0.86  |
| 4265 | c1cc(O)C(N)F)I                     | C19616304 | -13.11 | 0.4   | -14.92 | 4.02 | -2.6  |
| 4266 | C=COCC(=O)c1ccccc1                 | C00395557 | -13.1  | 3.05  | -15.85 | 4.32 | -4.63 |
| 4267 | COc1cc(O)CC(F)F                    | C02584353 | -13.1  | 1.77  | -15.09 | 3.19 | -2.97 |
| 4268 | [H]N=C/(CC1)SCC                    | C04352967 | -13.1  | -1.05 | -13.81 | 1.52 | 0.23  |
| 4269 | c1cc(O)C(c1Cl)O)N                  | C04520808 | -13.1  | -3.53 | -12.64 | 3.24 | -0.17 |
| 4270 | Cc1ccc2c1n[nH]n2                   | C05116315 | -13.1  | -5.33 | -10.91 | 5.06 | -1.92 |
| 4271 | c1cc(O)C(O)C(F)F)F                 | C05177786 | -13.1  | -3.52 | -13.71 | 4.85 | -0.71 |
| 4272 | c1ccc2c1c1c[nH]2)C#N               | C05544212 | -13.1  | -1.61 | -13.67 | 4.79 | -2.61 |
| 4273 | c1(c([nH]c(=O)[nH]c1=O)N)Cl        | C06239834 | -13.1  | -4.68 | -19.2  | 9.22 | 1.56  |
| 4274 | c1c(O)C(=O)[N+](=O)[O-])F)Cl       | C15442494 | -13.1  | -2.17 | -12.38 | 4.33 | -2.88 |
| 4275 | c1nnc(n1N)[S-]                     | C16979488 | -13.1  | -5.02 | -14.39 | 8.24 | -1.92 |
| 4276 | c1nc(c2c(n1)sn2)NN                 | C17352058 | -13.1  | -2    | -16.03 | 5.03 | -0.1  |
| 4277 | Cn1cncc1CCI                        | C19090588 | -13.1  | -0.6  | -14.12 | 5.28 | -3.65 |
| 4278 | c1cc(O)C(c1F)C)N)F                 | C19171894 | -13.1  | 3.32  | -18.43 | 3.41 | -1.4  |
| 4279 | C1CC[NH2+][C@H](C1)Br              | C26893210 | -13.1  | 0.14  | -12.68 | 0.94 | -1.5  |
| 4280 | c1cc(O)C(=O)O                      | C00156709 | -13.09 | -2.52 | -15.63 | 6.02 | -0.96 |
| 4281 | CC(=O)SCc1ccco1                    | C00409294 | -13.09 | -1.94 | -12.25 | 4.43 | -3.33 |
| 4282 | c1c(O)C(n1)N)N)Cl                  | C00967252 | -13.09 | -4.32 | -14.72 | 5.16 | 0.79  |
| 4283 | c1cnc(O)CCO                        | C01435984 | -13.09 | -3.16 | -15.43 | 4.62 | 0.88  |
| 4284 | CCOC(=O)[C@H](C(=O)C)F             | C01614535 | -13.09 | -1.18 | -12.64 | 3.59 | -2.86 |
| 4285 | CCC(=O)C(F)F)F                     | C01675401 | -13.09 | -0.26 | -13.11 | 2.71 | -2.43 |
| 4286 | Cc1ccoc1                           | C01683907 | -13.09 | -1.48 | -13.98 | 4.03 | -1.66 |
| 4287 | COCC(=O)C1=NCCOC1=O                | C04042532 | -13.09 | 1.61  | -19.4  | 6.63 | -1.92 |
| 4288 | C1CCC(C1)S                         | C04501358 | -13.09 | 0.41  | -11.11 | 0.76 | -3.16 |
| 4289 | C/(C=C/C)NC(=S)N                   | C05500579 | -13.09 | -1.47 | -17.38 | 2.99 | 2.76  |
| 4290 | [C@H](C(F)F)(F)C(F)Cl)O            | C08698375 | -13.09 | -1.72 | -12.8  | 2.16 | -0.73 |
| 4291 | COCC(=O)C(=N+)(O)[O-])[N+](=O)[O-] | C15771887 | -13.09 | 0.73  | -17.4  | 6.4  | -2.82 |
| 4292 | c1cnc(O)C(F)F)C#N                  | C16159523 | -13.09 | 0.41  | -15.28 | 4.84 | -3.06 |
| 4293 | c1c(O)C(c(n1)[N+](=O)[O-])N)N      | C19117694 | -13.09 | -3.46 | -15.5  | 5.52 | 0.35  |
| 4294 | CCOC=C(=O)Cl                       | C21987137 | -13.09 | 0.17  | -14.42 | 3.38 | -2.21 |
| 4295 | C1C2c(O)C2C#N)C1                   | C24445897 | -13.09 | 2.11  | -16.88 | 4.86 | -3.18 |
| 4296 | c1c(O)C(n1)NO)Cl                   | C26441010 | -13.09 | -4.19 | -15.34 | 7.31 | -0.87 |
| 4297 | c1cscc1C(=S)N                      | C00161840 | -13.08 | -2.85 | -17.87 | 9.67 | -2.04 |
| 4298 | Cc1cccn1)C                         | C00967363 | -13.08 | -2.17 | -13.43 | 4.8  | -2.28 |
| 4299 | c1cc2c(O)cc1N                      | C01389542 | -13.08 | -2.29 | -13.45 | 4.59 | -1.93 |
| 4300 | c1(c([nH]n1)N)C(=O)N               | C01653220 | -13.08 | -6.96 | -16.87 | 5.41 | 5.35  |
| 4301 | CN1C=NN(C=N1)C                     | C01720059 | -13.08 | -2.17 | -13.65 | 6.17 | -3.43 |
| 4302 | C(CCl)C(=O)Cl                      | C01736653 | -13.08 | 0.18  | -13.3  | 2.44 | -2.4  |
| 4303 | CC(C)CO[N+](=O)[O-]                | C02034837 | -13.08 | -0.88 | -11.92 | 1.61 | -1.88 |
| 4304 | c1cscc1C(=O)N                      | C02548216 | -13.08 | -2.14 | -17.79 | 7.05 | -0.21 |
| 4305 | Cc1ccc(O)C(F)F                     | C04208889 | -13.08 | -1.4  | -15.13 | 3.8  | -0.36 |
| 4306 | Cc1c([nH]cn1)C=O                   | C04807266 | -13.08 | -3.28 | -14.35 | 6.35 | -1.79 |
| 4307 | CN=C(=O)C(C(F)F)F)Cl               | C04865168 | -13.08 | -2.68 | -13.77 | 5.32 | -1.95 |
| 4308 | c1cc(O)C(=O)C([N+](=O)[O-])[O-]    | C06829185 | -13.08 | -0.7  | -18.64 | 7.96 | -1.71 |
| 4309 | c1nc(O)C(F)F)N                     | C12395192 | -13.08 | -0.72 | -17.57 | 8.33 | -3.11 |
| 4310 | [H]N=C(NC#N)Nc1ccc(O)C1            | C13116101 | -13.08 | -1.21 | -10.03 | 4.09 | -5.94 |
| 4311 | COCC(=O)COc1ccco1)F                | C20297595 | -13.08 | -2.15 | -12.71 | 5.92 | -4.15 |
| 4312 | c1cc(O)C1=NN(C(=S)N)F              | C00069512 | -13.07 | -1.68 | -18.42 | 9.91 | -2.88 |
| 4313 | c1c(O)C(Cc1N)O)N                   | C00403311 | -13.07 | -5.66 | -15.98 | 4.49 | 4.08  |
| 4314 | CC(=O)C(Cl)Cl                      | C01675518 | -13.07 | -1.4  | -12.34 | 3.01 | -2.34 |
| 4315 | c1c(O)C([nH]c(O)Oc1=O)Br           | C01760207 | -13.07 | -1.42 | -16.24 | 5.83 | -1.24 |
| 4316 | c1c(nc2nncn2c1[O-])[O-]            | C02327305 | -13.07 | -8.85 | -14.99 | 9.98 | 0.79  |

|      |                                  |           |        |       |        |       |       |
|------|----------------------------------|-----------|--------|-------|--------|-------|-------|
| 4317 | Cc1cc(cc(c1)F)N                  | C02555193 | -13.07 | -2.68 | -10.75 | 2.67  | -2.33 |
| 4318 | CCc1ccc(=O)N(N)[O-]              | C04054152 | -13.07 | -2.73 | -11.37 | 4.74  | -3.72 |
| 4319 | c1ccc(c(c1)/C(=O)N)/N)Cl         | C12504600 | -13.07 | -3.64 | -13.74 | 5.73  | -1.41 |
| 4320 | C(=N)N(H)+C(=O)N(N)C(F)F         | C17328624 | -13.07 | -4.89 | -14.55 | 7.81  | -1.44 |
| 4321 | COCC1nc(no1)CCl                  | C19092519 | -13.07 | -2.57 | -14.86 | 4.9   | -0.54 |
| 4322 | c1c(ccn1)NC=O                    | C22000930 | -13.07 | -3.28 | -18.11 | 8.53  | -0.21 |
| 4323 | c1ccc2c(c1)c([nH]2)N             | C00530874 | -13.06 | -2.68 | -12.27 | 3.72  | -1.84 |
| 4324 | Cc1c(ccn1)N)N                    | C01688414 | -13.06 | -3.68 | -16.27 | 4.61  | 2.28  |
| 4325 | CCOC(=O)C(=O)CBr                 | C01752920 | -13.06 | 1.27  | -13.51 | 2.93  | -3.75 |
| 4326 | C(CC(=C(F)F)F)CO                 | C02530956 | -13.06 | -3.61 | -11.79 | 3.1   | -0.76 |
| 4327 | c1ccc(cc1)COCC=O                 | C02556950 | -13.06 | 1.29  | -16.34 | 5.18  | -3.18 |
| 4328 | C1C=C(CS1)C=O                    | C03346456 | -13.06 | -1.17 | -15.97 | 6.68  | -2.61 |
| 4329 | CN1CCSC1=[NH2+]                  | C03865408 | -13.06 | -1.57 | -13.72 | 4.04  | -1.8  |
| 4330 | c1c2c([nH]n1)CCC2                | C05013003 | -13.06 | -2.83 | -16.19 | 5.05  | 0.91  |
| 4331 | c1cc(c(cc2c1non2)N)Cl            | C12243770 | -13.06 | -1.84 | -12.43 | 2.67  | -1.46 |
| 4332 | Cc1c(=O)nc(=O)[nH]n1)N           | C16249017 | -13.06 | -2.73 | -16.81 | 5.11  | 1.37  |
| 4333 | C1C(=C(C(=O)O1)Cl)[O-]           | C18183478 | -13.06 | -1.39 | -15.02 | 5.17  | -1.8  |
| 4334 | c1ccc(cc1)N(=[O-])[O-]O          | C19691768 | -13.06 | -1.23 | -17.53 | 6.02  | -0.32 |
| 4335 | c1c(c(c(c1)F)F)F)N)N             | C21304442 | -13.06 | -1.36 | -14.52 | 4.56  | -1.74 |
| 4336 | C/C(=C/C([NH2+]CC=C)/Br          | C26504236 | -13.06 | -1.34 | -10.16 | 0.96  | -2.53 |
| 4337 | c1(c(nc2c(n1)non2)N)N            | C01082675 | -13.05 | -9.01 | -15.42 | 11.23 | 0.15  |
| 4338 | CC(=CC#N)C                       | C01756010 | -13.05 | -1.75 | -13.25 | 4.17  | -2.22 |
| 4339 | c1cc(cc1CO)F)N                   | C02243164 | -13.05 | -2.08 | -15.56 | 4.28  | 0.31  |
| 4340 | Cn1cc(=O)N=C=S                   | C02537532 | -13.05 | -0.67 | -14.58 | 4.67  | -2.48 |
| 4341 | COc1[nH]c(=O)s1                  | C03650785 | -13.05 | -2.86 | -16.41 | 3.46  | 2.77  |
| 4342 | Cc1c2c(c(n1)N)N(=[O-])[O-]       | C04067459 | -13.05 | -5.62 | -10.16 | 4.27  | -1.53 |
| 4343 | C([C@H](C)O)N(=[O-])[O-]N(=[O-]) | C04212632 | -13.05 | -1.55 | -14.47 | 5.17  | -2.19 |
| 4344 | CCOC(=O)NNC(=O)O                 | C04962795 | -13.05 | -6.31 | -15.38 | 6.17  | 2.47  |
| 4345 | Cc1c([n+](on1)[O-])[N+](=O)[O-]  | C05064025 | -13.05 | -1.62 | -16.66 | 7.63  | -2.4  |
| 4346 | C=Cn1cc(=O)Br                    | C05495164 | -13.05 | -0.87 | -14.81 | 3.88  | -1.24 |
| 4347 | c1c(c([nH]c(=O)c1)Cl)Br          | C15684480 | -13.05 | -4.64 | -14.3  | 7.77  | -1.88 |
| 4348 | c1(c(c(c1)N)F)F)F)Cl)F           | C16159831 | -13.05 | -2.81 | -10.81 | 2.1   | -1.54 |
| 4349 | Cc1c(scc1/C=C/[N+](=O)[O-])C     | C20921170 | -13.05 | -1.6  | -11.13 | 4.93  | -5.24 |
| 4350 | c1c(ncn1)Cl)CF                   | C26466628 | -13.05 | -2.54 | -11.71 | 4.05  | -2.85 |
| 4351 | CNC(=S)Nc1ccc(cc1)F              | C00088789 | -13.04 | -0.65 | -15.93 | 7.11  | -3.57 |
| 4352 | C/C(=O)N)/c1cc([nH]c1            | C00153021 | -13.04 | -3.21 | -14.45 | 5.2   | -0.58 |
| 4353 | c1c(cc(cc1)F)F)C=O               | C00164753 | -13.04 | -1.74 | -12.76 | 4.68  | -3.22 |
| 4354 | c1cc(cc(c1)Br)O                  | C00388034 | -13.04 | -1.18 | -15.76 | 2.74  | 1.15  |
| 4355 | Cc1cc([nH]1)C                    | C00594608 | -13.04 | -1.87 | -13.58 | 4.1   | -1.7  |
| 4356 | CSCC(Cl)                         | C01592634 | -13.04 | 0.56  | -11.83 | 1.24  | -3.01 |
| 4357 | C=CN=C=O                         | C02509860 | -13.04 | -0.84 | -12.44 | 1.61  | -1.37 |
| 4358 | c1c(cc(c(c1)C#N)F)F)F            | C02575065 | -13.04 | 2.06  | -15.34 | 3.79  | -3.55 |
| 4359 | c1([nH]nc(n1)N)N                 | C04118774 | -13.04 | -5.49 | -14.59 | 8.59  | -1.55 |
| 4360 | CC(C)CON=O                       | C04261994 | -13.04 | -0.73 | -11.52 | 1.95  | -2.74 |
| 4361 | c1(nc2c(n1)nc2[N+](=O)[O-])N)N   | C04558145 | -13.04 | 0.95  | -13.94 | 6.52  | -6.58 |
| 4362 | c1nc([nH]1)CCl                   | C06062898 | -13.04 | -2.73 | -16.14 | 4.91  | 0.92  |
| 4363 | c1cc(c(cc1)F)/C(=O)N)F           | C06453252 | -13.04 | -4.68 | -14.09 | 5.44  | 0.29  |
| 4364 | c1c(=O)n2c(n1)sc(n2)[S-]         | C06523955 | -13.04 | -3.78 | -17.96 | 7.88  | 0.82  |
| 4365 | Cc1[nH]c([nH+])1                 | C08283844 | -13.04 | -2.06 | -14.51 | 5.18  | -1.64 |
| 4366 | C=CCn1cnc(n1)I                   | C08295365 | -13.04 | -1.76 | -12.76 | 5.81  | -4.33 |
| 4367 | C/C(=O)N)/c1ccc(=O)1             | C12866695 | -13.04 | -4.15 | -12.56 | 4.39  | -0.71 |
| 4368 | c1cc(oc1)CCC=O                   | C13546592 | -13.04 | -1.18 | -15.02 | 6.06  | -2.89 |
| 4369 | CC(=O)O/C(=C(C(F)F)F)F)F         | C14628477 | -13.04 | -1.42 | -12.57 | 4.34  | -3.38 |
| 4370 | CCNc1cnc(n1)Cl                   | C16124192 | -13.04 | -3.57 | -11.36 | 3.3   | -1.41 |
| 4371 | c1cc(c(nc1)N)C=N/O               | C19735473 | -13.04 | -5.17 | -14.77 | 6.54  | 0.35  |
| 4372 | C#CCNc1ccc(s1                    | C19875410 | -13.04 | -0.47 | -12.77 | 2.95  | -2.75 |
| 4373 | c1c(noc1N)C(F)F                  | C26512576 | -13.04 | -3.76 | -15.34 | 5.92  | 0.15  |
| 4374 | c1cc2c(cc1CO)non2                | C00158674 | -13.03 | -4.29 | -14.21 | 5.75  | -0.28 |
| 4375 | CCn1cccc1=O                      | C00397642 | -13.03 | -1.88 | -16.71 | 8.77  | -3.2  |
| 4376 | CN1C2=CC=CCN2N=N1                | C01598330 | -13.03 | 0.74  | -15.18 | 3.97  | -2.57 |
| 4377 | CCOC(=O)N=C=O                    | C01711364 | -13.03 | -0.99 | -15.91 | 2.47  | 1.4   |
| 4378 | C1=CC=CC(C=C1)NC(=O)N            | C01727544 | -13.03 | 0.1   | -21.8  | 6.23  | 2.44  |
| 4379 | c1(c(non1)N)c2nc(on2)C(F)F       | C02271911 | -13.03 | -0.56 | -15.47 | 3.13  | -0.12 |
| 4380 | Cn1ccc(n1)[N+](=O)[O-]           | C04293945 | -13.03 | -3.76 | -15.25 | 9.15  | -3.17 |
| 4381 | Cc1cnc([nH]c1=O                  | C05545258 | -13.03 | -4.07 | -17.47 | 8.22  | 0.29  |
| 4382 | Cc1[nH]c2c(n1)ccc2               | C06369911 | -13.03 | -2.1  | -15.4  | 7.08  | -2.62 |
| 4383 | C1=C/C(=C)N)C(=O)C=C1            | C06661478 | -13.03 | -1.5  | -15.25 | 3.77  | -0.05 |
| 4384 | c1cc2c([nH]c(=O)oc2=O)nc1        | C11919575 | -13.03 | 2.19  | -20.61 | 7.16  | -1.76 |
| 4385 | c1cc(nc(c1)F)C#N                 | C12359444 | -13.03 | -0.38 | -17.44 | 7.02  | -2.24 |
| 4386 | c1cc(oc1CN=O)[N+](=O)[O-]        | C13828133 | -13.03 | -1.71 | -15.95 | 5.51  | -0.89 |
| 4387 | c1ccn(c(=O)c1)C[C@H]2CO2         | C19258978 | -13.03 | -2.88 | -15.87 | 7.81  | -2.09 |
| 4388 | CNc1cc(c1)F)F                    | C20044972 | -13.03 | -2.21 | -10.49 | 2.37  | -2.69 |
| 4389 | Cc1csc(n1)C                      | C00150863 | -13.02 | -0.96 | -13.14 | 3.4   | -2.31 |
| 4390 | c1cc(nnc1)CO                     | C00158628 | -13.02 | -1.68 | -17.84 | 5.86  | 0.64  |
| 4391 | c1cc(ccc1C(=O)C=O)F              | C01595133 | -13.02 | 1.37  | -19.53 | 9.03  | -3.89 |
| 4392 | Cc1c(sc(n1)[S-])C                | C02384954 | -13.02 | -1.17 | -12.61 | 3.17  | -2.41 |
| 4393 | c1c(c(n1)CC=O)[N+](=O)[O-]       | C02537471 | -13.02 | -3.78 | -17.05 | 10.1  | -2.29 |
| 4394 | CCOCCBr                          | C04283933 | -13.02 | -0.59 | -11.59 | 2     | -2.85 |
| 4395 | CC(=CC)S                         | C05138189 | -13.02 | -0.25 | -13.12 | 1.01  | -0.66 |
| 4396 | [C@H](C)C(F)F)OC(F)F)F           | C08698271 | -13.02 | 0.2   | -13.3  | 1.81  | -1.74 |
| 4397 | [H]/N=C([C@H](C#N)Cl)C(F)F       | C16158417 | -13.02 | -1.02 | -13.35 | 2.18  | -0.83 |
| 4398 | C/C=C/C(=O)N                     | C17299624 | -13.02 | -3.18 | -16.03 | 5.74  | 0.45  |
| 4399 | c1ccn(c1)CCl                     | C26422555 | -13.02 | -1.18 | -9.33  | 2.19  | -4.7  |
| 4400 | c1cc(nnc1)N)F                    | C30678112 | -13.02 | -3.97 | -16.6  | 7.81  | -0.25 |
| 4401 | C1[C@H](NCS1)C(=O)Cl             | C32016247 | -13.02 | 0.7   | -17.14 | 4.09  | -0.66 |
| 4402 | CCOC(=S)C(=O)N                   | C33359018 | -13.02 | -4.04 | -14.97 | 6.02  | -0.02 |
| 4403 | c1c(c(cc1)F)C)N)N                | C00152701 | -13.01 | 0.32  | -16.29 | 3.76  | -0.8  |
| 4404 | c1cc2c(cc1N)oc(=O)[nH]2          | C00347252 | -13.01 | -5.68 | -14.62 | 7.25  | 0.04  |
| 4405 | CCOC(=O)c1cncnc1N                | C00408009 | -13.01 | -0.66 | -13.68 | 3.81  | -2.48 |
| 4406 | COCCOC(=O)CCCl                   | C01597354 | -13.01 | 0.94  | -16.98 | 4.08  | -1.04 |



|      |                                |           |        |       |        |       |       |
|------|--------------------------------|-----------|--------|-------|--------|-------|-------|
| 4407 | CCC(=O)C(=O)C                  | C01683666 | -13.01 | -0.48 | -12.84 | 2.42  | -2.11 |
| 4408 | CCc1ccc(O)C(=O)C               | C01707723 | -13.01 | -1.26 | -12.41 | 4.26  | -3.61 |
| 4409 | COCCC=C                        | C01769413 | -13.01 | 0.03  | -13.35 | 1.31  | -1.01 |
| 4410 | C=CC(C=C)O                     | C01845568 | -13.01 | -0.61 | -13.81 | 1.47  | -0.06 |
| 4411 | CCSc1nnn1N                     | C02554082 | -13.01 | -0.91 | -14.86 | 5.73  | -2.97 |
| 4412 | c1c([nH]nc1N)C2CC2             | C04674333 | -13.01 | -3.49 | -14.75 | 6.56  | -1.33 |
| 4413 | CCOC(=O)c1cnnc1N               | C04889229 | -13.01 | -5.64 | -19.87 | 10.39 | 2.13  |
| 4414 | COC(=O)c1cnsc1                 | C12650022 | -13.01 | -1.48 | -13.34 | 3.89  | -2.07 |
| 4415 | c1cn(cn1)C(=O)C(=O)NN          | C13207717 | -13.01 | 2.02  | -20.98 | 5.6   | 0.35  |
| 4416 | c1csc(n1)C#N                   | C14982559 | -13.01 | -1.53 | -14.56 | 4.77  | -1.68 |
| 4417 | c1c(c(c(c1F)F)[N+](=O)[O-])N)F | C15440474 | -13.01 | -2.34 | -12.07 | 3.98  | -2.58 |
| 4418 | c1c(ncn(c1B)F)N                | C16159755 | -13.01 | 0.48  | -17.34 | 4.76  | -0.91 |
| 4419 | c1cc2nnn2cc1N                  | C18555997 | -13.01 | -3.61 | -16.13 | 9.3   | -2.56 |
| 4420 | C=C(CO)C1CCOC1                 | C21997324 | -13.01 | -0.18 | -16.63 | 4.77  | -0.96 |
| 4421 | c1ccc2c(c1)[nH]c(n2)CF         | C26466829 | -13.01 | -4.47 | -13.27 | 8.01  | -3.28 |
| 4422 | CC(=O)CSc1nnn1N                | C32698059 | -13.01 | -3.42 | -16.07 | 9.51  | -3.02 |
| 4423 | c1cc(ccc1OC(=S)Cl)Cl           | C00403296 | -13    | 0.12  | -14.92 | 1.66  | 0.14  |
| 4424 | c1cc(c(cc1OC(F)F)F)N)N         | C02243191 | -13    | -0.41 | -15.39 | 3.01  | -0.21 |
| 4425 | c1cc(c(cc1C#N)F)[N+](=O)[O-]   | C02540647 | -13    | -2.72 | -13.15 | 6.98  | -4.11 |
| 4426 | CC(=O)NCC1CCC(c1)F             | C02562036 | -13    | 0.46  | -16.83 | 6.07  | -2.7  |
| 4427 | c1(nc(c1)N(c(=O)n1)Cl)Cl)O     | C04217607 | -13    | -0.18 | -15.6  | 3.5   | -0.73 |
| 4428 | c1[n-c(n1)C#N                  | C04218567 | -13    | -4.29 | -14.25 | 7.53  | -1.98 |
| 4429 | c1nc(c(n1)N)C#N                | C05020384 | -13    | -3.42 | -16.91 | 8.23  | -0.9  |
| 4430 | CC1=NN=C(C1)OC                 | C05285841 | -13    | -2.46 | -14.32 | 4.07  | -0.29 |
| 4431 | C(n1nc(nn1)C(F)F)F[N+](=O)[O-] | C05369174 | -13    | -2.29 | -15.09 | 7.02  | -2.64 |
| 4432 | c1cc(c(c1)Nc2nc(cnn2)[O-])O    | C08738204 | -13    | 2.39  | -20.53 | 6.6   | -1.46 |
| 4433 | CCOC(=O)C=C(Cl)C               | C13380320 | -13    | -0.79 | -12.45 | 3.5   | -3.27 |
| 4434 | COCC/C=C(Cl)Cl                 | C16997518 | -13    | -1.11 | -10.91 | 1.9   | -2.88 |
| 4435 | CCn1ncc(n1)N                   | C19088830 | -13    | -2.05 | -15.5  | 4.97  | -0.42 |
| 4436 | C=CCNC#C                       | C19735309 | -13    | -0.37 | -13.13 | 2.06  | -1.56 |
| 4437 | Cn1c(c(n1)C#N)N                | C00169364 | -12.99 | -2.99 | -16.33 | 6.31  | -0.94 |
| 4438 | C=CNC(=O)C(C(F)F)F)F)F)F)F     | C01730429 | -12.99 | 0.41  | -13.69 | 2.84  | -2.55 |
| 4439 | COC(=O)C(C(F)F)F)C(F)F)F)F     | C02040737 | -12.99 | -0.39 | -12.07 | 4     | -4.53 |
| 4440 | c1(c(=O)[nH]c(O)[nH]n1)C(F)F)F | C02479684 | -12.99 | -3.58 | -15.92 | 5.45  | 1.06  |
| 4441 | c1nnn1CCO                      | C02507132 | -12.99 | -5.59 | -15.66 | 7.98  | 0.27  |
| 4442 | CNc1c(nof[n+][O-])[N+](=O)[O-] | C04087617 | -12.99 | -3.25 | -12.91 | 5.61  | -2.44 |
| 4443 | C1[C@H]([C@@H]([C@H]1)C)C=O    | C05031331 | -12.99 | -1.27 | -14.55 | 4.05  | -1.23 |
| 4444 | [H]N=C(/C/Nc1ccccc1)C#N        | C05590893 | -12.99 | -4.37 | -9.94  | 3.6   | -2.28 |
| 4445 | C[C@H]1CON=C1[N+](=O)[O-]      | C15784735 | -12.99 | -0.34 | -14.61 | 4.49  | -2.53 |
| 4446 | OCCc1ccccc1                    | M1995A044 | -12.99 | -1.48 | -12.54 | 3.31  | -2.28 |
| 4447 | c1ccc(cc1)CONC(=O)N            | C00084002 | -12.98 | -3.23 | -18.86 | 10.39 | -1.28 |
| 4448 | c1cc(c(cc1F)[N+](=O)[O-])F     | C00164551 | -12.98 | -1.83 | -14.61 | 5.79  | -2.33 |
| 4449 | C=C[C@H]([C@@H]([C@H]1)C)O)O   | C00389839 | -12.98 | -1.43 | -14.11 | 2.1   | 0.45  |
| 4450 | CC(=CC1c1ccccc1)O)C            | C01600125 | -12.98 | -0.36 | -15.17 | 2.97  | -0.42 |
| 4451 | COC(=O)CCCl                    | C01696146 | -12.98 | -0.51 | -14.15 | 3.13  | -1.46 |
| 4452 | c1ccc(cc1)O)C1                 | C01846601 | -12.98 | -2.28 | -16.26 | 8.25  | -2.68 |
| 4453 | Cc1ccc(O)SC                    | C01850677 | -12.98 | -0.71 | -11.81 | 2.93  | -3.39 |
| 4454 | CCC[C@H]([C@@H]([C@H]1)C)O     | C02037591 | -12.98 | -1.17 | -11.39 | 1.19  | -1.61 |
| 4455 | CCOC(=O)C(=O)C(C)C             | C02534762 | -12.98 | 0.21  | -12.5  | 3.1   | -3.78 |
| 4456 | CCn1ccc(n1)N                   | C02558418 | -12.98 | -1.71 | -15.09 | 5.32  | -1.5  |
| 4457 | c1ccc2c(c1)c(n[nH]2)Cl         | C03852548 | -12.98 | 2.41  | -18.56 | 6     | -2.83 |
| 4458 | c1cnnc1)CCO                    | C03861008 | -12.98 | -3.35 | -13.22 | 4.09  | -0.5  |
| 4459 | c1c[nH]nc1C2CC2                | C04291288 | -12.98 | -1.98 | -13.13 | 4.46  | -2.33 |
| 4460 | C1[C@H]([C@@H]([C@H]1)C)C=O    | C04429377 | -12.98 | -1.77 | -11.68 | 4.81  | -4.34 |
| 4461 | CCOC(=O)C=C(C)C                | C05324772 | -12.98 | -0.6  | -12.41 | 3.83  | -3.8  |
| 4462 | Cc1ccc(cc1)[N+](=O)[O-]        | C06276125 | -12.98 | -3    | -11.95 | 5.04  | -3.09 |
| 4463 | c1cc(oc1)C=C[N+](=O)[O-]       | C12370918 | -12.98 | -0.25 | -17.08 | 8.32  | -3.98 |
| 4464 | Cn1cnnc1[N+](=O)[O-]           | C13207526 | -12.98 | -2.6  | -14.65 | 8.84  | -4.57 |
| 4465 | CCCc1nccc1                     | C00164546 | -12.97 | -0.9  | -11.91 | 2.88  | -3.04 |
| 4466 | Cc1cnnc1C                      | C00967364 | -12.97 | -1.33 | -13.98 | 4.5   | -2.16 |
| 4467 | c1cc(ccc1)C=C(C)O)O            | C01529484 | -12.97 | -2.51 | -15.32 | 4.78  | 0.08  |
| 4468 | C=CCOC(=S)S                    | C01602466 | -12.97 | -0.74 | -13.75 | 3.85  | -2.32 |
| 4469 | c1c(ncs1)CON                   | C01704689 | -12.97 | -2.73 | -14.32 | 3.9   | 0.18  |
| 4470 | C1CC=C(C1)C(=O)N               | C01706729 | -12.97 | -1.6  | -16.15 | 5.46  | -0.68 |
| 4471 | c1csc(=S)s1                    | C01845530 | -12.97 | -2.25 | -13.26 | 5.77  | -3.23 |
| 4472 | CO[C@H]([C@@H]([C@H]1)C)C=C1   | C02143306 | -12.97 | -0.94 | -13.12 | 1.6   | -0.51 |
| 4473 | C=Cc1ccc(cc1)C#N               | C02571926 | -12.97 | -1.25 | -12.84 | 3.68  | -2.56 |
| 4474 | C1Cn2c(nnn2)N1                 | C03590965 | -12.97 | -3.81 | -17.17 | 8.98  | -0.98 |
| 4475 | CCOC([C@H]([C(F)F)F)F)F)F)F    | C04266049 | -12.97 | -0.82 | -11.37 | 2.51  | -3.29 |
| 4476 | COC(=O)[C@H]([C@@H]([C(F)F)F)O | C04269247 | -12.97 | -1.86 | -14.22 | 3.85  | -0.74 |
| 4477 | C1CCC(=O)C=CC1                 | C04528558 | -12.97 | -1    | -12.61 | 3.85  | -3.21 |
| 4478 | C1=CC2C=CC=C2CN2C=C1           | C05282709 | -12.97 | -1.57 | -9.46  | 2.67  | -4.61 |
| 4479 | Cc1cnoc1C                      | C05783285 | -12.97 | -1.34 | -13.54 | 3.78  | -1.86 |
| 4480 | CC(=O)NNC(=S)N                 | C06602474 | -12.97 | -0.98 | -17.33 | 5     | 0.34  |
| 4481 | C1CO[C@H]1Cl                   | C14983076 | -12.97 | -0.47 | -11.74 | 1.77  | -2.53 |
| 4482 | Cc1c(ccc(c1F)N)N               | C16677972 | -12.97 | -4.42 | -10.91 | 3.13  | -0.77 |
| 4483 | c1cm(cn1)CCC=O                 | C28628432 | -12.97 | -2.25 | -16.58 | 9.15  | -3.29 |
| 4484 | C1COC=C1C(=O)C(F)F)Cl          | C32628531 | -12.97 | -1.44 | -12.3  | 3.34  | -2.56 |
| 4485 | c1cc(sc1)C(=O)CC#N             | C00047508 | -12.96 | 0.74  | -19.71 | 9.47  | -3.46 |
| 4486 | Cc1csc(n1)CC#N                 | C00164976 | -12.96 | -1.45 | -15.98 | 7.17  | -2.71 |
| 4487 | CCCOC(C)C#N                    | C01641037 | -12.96 | -1.4  | -12.97 | 4.08  | -2.66 |
| 4488 | c1ccc(cc1)CC(C=O)Cl            | C01641183 | -12.96 | -1.94 | -12.95 | 3.12  | -1.19 |
| 4489 | c1ccn2cnnc2c1                  | C01695118 | -12.96 | -3.12 | -18    | 9.89  | -1.72 |
| 4490 | Cc1c(c(ncn1)N)N                | C01711127 | -12.96 | -2.24 | -15.56 | 5.01  | -0.18 |
| 4491 | C/C=C/Sc1cccc1                 | C01721964 | -12.96 | 0.38  | -14.43 | 2.22  | -1.13 |
| 4492 | CC(=C)CC(=O)C                  | C02038441 | -12.96 | -1.27 | -11.89 | 3.06  | -2.85 |
| 4493 | C#CCN=C=S                      | C02528120 | -12.96 | -1.51 | -12.21 | 2.55  | -1.79 |
| 4494 | c1(c(c(nnc1N)N)N)N             | C04342670 | -12.96 | -6.32 | -18.62 | 7.31  | 4.67  |
| 4495 | Cc1[nH]c2nnc(n2n1)N            | C05721316 | -12.96 | -4.65 | -16.35 | 12.45 | -4.4  |
| 4496 | c1cc(nnc1F)F                   | C06093471 | -12.96 | -1.41 | -15.49 | 5.54  | -1.6  |

|      |                                |           |        |       |        |      |       |
|------|--------------------------------|-----------|--------|-------|--------|------|-------|
| 4497 | #CCn1cnc(n1)l                  | C08295369 | -12.96 | -3.3  | -12.74 | 7.4  | -4.31 |
| 4498 | c1cc(cnc1)/C=C/2/C(=O)NC(=O)N2 | C12934220 | -12.96 | 1.21  | -21.3  | 7.33 | -0.2  |
| 4499 | CCCC/C=C/C=O                   | C13544962 | -12.96 | -0.95 | -12.52 | 4.12 | -3.61 |
| 4500 | C=CCNC(=S)S                    | C13562440 | -12.96 | -1.96 | -15.04 | 6    | -1.96 |
| 4501 | c1c(c(ncn1)Cl)l                | C21299825 | -12.96 | -1.2  | -11.17 | 2.38 | -2.96 |
| 4502 | c1c(cnc(c1F)N)C(F)F            | C21304412 | -12.96 | -2.53 | -11.91 | 3.28 | -1.81 |
| 4503 | CCn1cncn1                      | C21985098 | -12.96 | -1.39 | -13.99 | 5.81 | -3.39 |
| 4504 | c1c(cc(nc1F)F)C#N              | C21985261 | -12.96 | -0.21 | -14.75 | 4.07 | -2.07 |
| 4505 | c1cc(ncc1)[N+](=O)[O-]CCl      | C21985582 | -12.96 | -3.27 | -11.54 | 5.4  | -3.55 |
| 4506 | c1c(csc1/C=C/N)OCl             | C00140134 | -12.95 | -3.91 | -13.16 | 3.3  | 0.82  |
| 4507 | C[C@H](c1c(ccc1F)F)O           | C00403102 | -12.95 | -0.11 | -14.89 | 4.17 | -2.12 |
| 4508 | CC(=O)SCC                      | C01606268 | -12.95 | 0.01  | -12.36 | 2.47 | -3.07 |
| 4509 | CC1csnn1                       | C01611441 | -12.95 | -1.25 | -15.41 | 4.9  | -1.19 |
| 4510 | CC1=CC(=O)NC1=O                | C01676456 | -12.95 | -1.75 | -17.33 | 5.17 | 0.96  |
| 4511 | CC(=C)CCl                      | C01683469 | -12.95 | -0.68 | -10.53 | 1.13 | -2.86 |
| 4512 | c1cc(nc(c1)Br)F                | C02384085 | -12.95 | -1    | -16.61 | 4.74 | -0.08 |
| 4513 | C(CBr)/C(=N/O)N                | C02547087 | -12.95 | -2.32 | -15.16 | 4.18 | 0.35  |
| 4514 | CCO[C@H]1[C@H](C=C)O1C         | C04897479 | -12.95 | 0.2   | -12.1  | 2.26 | -3.32 |
| 4515 | c1cc(c(cc1)S)O                 | C05133255 | -12.95 | -2.75 | -15.67 | 4.78 | 0.7   |
| 4516 | C=C(CNC(=S)N)Br                | C05600792 | -12.95 | -1.67 | -17.67 | 3.12 | 3.27  |
| 4517 | Cc1ccc(c(=O)[nH]1)Br           | C08698092 | -12.95 | -1.83 | -15.51 | 4.42 | -0.02 |
| 4518 | c1cc(sc1CO)Cl                  | C08727655 | -12.95 | -2.56 | -12.79 | 3.34 | -0.94 |
| 4519 | c1c(ncc(n1)Br)O                | C12356940 | -12.95 | -2.05 | -16.89 | 4.08 | 1.91  |
| 4520 | c1cc(=O)[nH]cc1C#N             | C12471683 | -12.95 | -2.87 | -18.53 | 9.8  | -1.35 |
| 4521 | CC(C)/C=C/C=O                  | C17284647 | -12.95 | -0.66 | -13.41 | 3.9  | -2.78 |
| 4522 | c1c(c(cnc1Cl)N)N               | C19800990 | -12.95 | -6.1  | -14.53 | 6.93 | 0.76  |
| 4523 | C1COC(=CO1)C[NH3+]             | C32629230 | -12.95 | -1.96 | -15.94 | 4.15 | 0.81  |
| 4524 | c1c(c(cc(c1O)N)O)N             | C00156887 | -12.94 | -3.89 | -17.45 | 4.39 | 4.01  |
| 4525 | c1scs(c1N)C(=O)N               | C00159923 | -12.94 | -4.64 | -15.5  | 5.91 | 1.29  |
| 4526 | c1(c([nH]c(=O)[nH]c1=O)N)Br    | C00967243 | -12.94 | -5    | -18.52 | 9.09 | 1.49  |
| 4527 | Cc1c(nc([nH]1)C                | C00967285 | -12.94 | -2.25 | -13.32 | 5.18 | -2.55 |
| 4528 | C=CC(=O)OCCBr                  | C01561510 | -12.94 | 0.41  | -14.52 | 4.55 | -3.38 |
| 4529 | CSCCSC                         | C01690291 | -12.94 | 0.96  | -11.98 | 1.59 | -3.5  |
| 4530 | c1ccc(cc1)NCCF                 | C01724315 | -12.94 | -0.98 | -14.17 | 2.57 | -0.35 |
| 4531 | c1c(ncs1)C(=O)N                | C02046868 | -12.94 | -4.14 | -17.13 | 6.17 | 2.17  |
| 4532 | COC(=O)N=C=O                   | C02384736 | -12.94 | -1.6  | -14.63 | 2.71 | 0.59  |
| 4533 | Cn1ccc(n1)N                    | C02565745 | -12.94 | -2.31 | -15.4  | 5.44 | -0.66 |
| 4534 | c1cc(=O)[nH]cc1C(F)Cl          | C03181206 | -12.94 | -1.07 | -15.92 | 6.12 | -2.08 |
| 4535 | c1csc(n1)C(=O)Cl               | C04277255 | -12.94 | 1.22  | -18.33 | 5.69 | -1.52 |
| 4536 | [C@](C(F)(F)Cl)(OC(F)(F)F)F)Cl | C04329298 | -12.94 | -0.21 | -10.57 | 0.15 | -2.32 |
| 4537 | C=C(C([NH+]=C(N)[S-])Cl        | C05600793 | -12.94 | -1.98 | -16.88 | 3.19 | 2.72  |
| 4538 | C/C(=N/O)C(=O)C                | C12358749 | -12.94 | -3.48 | -14.59 | 4.95 | 0.17  |
| 4539 | Cc1c(scc1N)C                   | C14000036 | -12.94 | -1.98 | -11.4  | 2.53 | -2.09 |
| 4540 | Cn1cncn1                       | C16977393 | -12.94 | -3.63 | -16    | 9.62 | -2.94 |
| 4541 | c1cc(ccc1[N+](=O)[O-])ON       | C20159946 | -12.94 | -1.17 | -15.18 | 5.42 | -2.01 |
| 4542 | C=Cn1cc(cn1)l                  | C29865927 | -12.94 | -0.86 | -12.4  | 3.75 | -3.43 |
| 4543 | CC(=O)c1cccc1F                 | C00157320 | -12.93 | 1.2   | -18.04 | 7.66 | -3.75 |
| 4544 | c1cc(nc(c1)F)F                 | C00388533 | -12.93 | -1.68 | -15.01 | 5.62 | -1.85 |
| 4545 | Cn1c(c(cn1)Br)N                | C01027574 | -12.93 | -3.7  | -12.06 | 4.26 | -1.43 |
| 4546 | CCO/C=C/C#N                    | C01641626 | -12.93 | -0.36 | -14.63 | 4.21 | -2.15 |
| 4547 | Cc1ccc(cc1)[n+][2cc(on2)][O-]  | C01668375 | -12.93 | -1.32 | -14.56 | 7.96 | -5    |
| 4548 | CC/C=C(C)C=O                   | C01699996 | -12.93 | -1.12 | -14.45 | 4.28 | -1.63 |
| 4549 | CCOc1ccc(c(c1)F)N              | C02382631 | -12.93 | -2.56 | -11.74 | 3.42 | -2.06 |
| 4550 | c1cc2c(ccc2)cc1C#N             | C02548356 | -12.93 | -2.23 | -11.75 | 4.92 | -3.87 |
| 4551 | Cc1cc(ns1)[O-]                 | C03128500 | -12.93 | -3.13 | -15.81 | 4.72 | 1.28  |
| 4552 | C(#N)c1c(non1)C#N              | C04343214 | -12.93 | -1.17 | -12.62 | 2.34 | -1.49 |
| 4553 | CCn1nc(nn1)N                   | C06226239 | -12.93 | -1.92 | -14.73 | 5.27 | -1.55 |
| 4554 | COC(=O)c1ccc(nn1)[O-]          | C07996961 | -12.93 | -1.42 | -16.61 | 5.57 | -0.47 |
| 4555 | c1c(cc(c(c1F)O)F)Cl            | C12359198 | -12.93 | -0.82 | -14.25 | 2.5  | -0.37 |
| 4556 | Cc1cc(on1)C=O                  | C12370185 | -12.93 | -1.57 | -14.38 | 4.79 | -1.78 |
| 4557 | c1cc(ncc1)CO                   | C14455323 | -12.93 | -1.92 | -17.71 | 4.6  | 2.1   |
| 4558 | c1c(nc(s1)Cl)CCl               | C15444540 | -12.93 | -1.99 | -12.03 | 3.7  | -2.61 |
| 4559 | C#C/C=C/CO                     | C17299191 | -12.93 | -3.01 | -12.81 | 3.24 | -0.34 |
| 4560 | c1cnc(cc1C#N)Cl                | C00154100 | -12.92 | -2.05 | -12.7  | 4.38 | -2.55 |
| 4561 | CC(=O)c1ccc(nc1)Cl             | C00161835 | -12.92 | -1.52 | -13.74 | 4.94 | -2.59 |
| 4562 | Cc1cncn1C                      | C00404377 | -12.92 | -1.17 | -14.03 | 3.96 | -1.68 |
| 4563 | CC(=O)OCC1=C(C=O)C=O           | C01568569 | -12.92 | -0.42 | -20.29 | 9.46 | -1.67 |
| 4564 | c1cnc(c1)N=C=S                 | C01737031 | -12.92 | -2.39 | -14.97 | 4.29 | 0.15  |
| 4565 | C1CC(=CC(=O)C1)[O-]            | C03860300 | -12.92 | -3.84 | -15.18 | 6.9  | -0.8  |
| 4566 | CC1=CC(=O)NON1                 | C04499552 | -12.92 | -3.08 | -17.69 | 7.4  | 0.45  |
| 4567 | Cc1cc(n2c(n1)nn2)[O-]          | C13154290 | -12.92 | -1.92 | -15.28 | 6.06 | -1.78 |
| 4568 | c1cc(ccc1O)OC(F)F              | C00162805 | -12.91 | -0.3  | -14.8  | 2.79 | -0.6  |
| 4569 | CSc1[nH]ccn1                   | C01671795 | -12.91 | -2.4  | -15.5  | 4.46 | 0.54  |
| 4570 | C=CCN(C(=O)O)OCC=C             | C01716734 | -12.91 | 1.02  | -16.79 | 5.07 | -2.2  |
| 4571 | c1cc(c(cc1N)CC#N)F             | C02243245 | -12.91 | -1.24 | -15.83 | 6.8  | -2.63 |
| 4572 | c1cc(cc(c1)O)CC#N              | C02507096 | -12.91 | -1.97 | -17.69 | 7.38 | -0.63 |
| 4573 | c1cc2c(c(c1)F)C@H(C2)O         | C03847714 | -12.91 | -0.65 | -14.46 | 4.02 | -1.83 |
| 4574 | CC(=O)CC(=O)C(=O)O             | C03882590 | -12.91 | -4.27 | -10.94 | 4.29 | -1.98 |
| 4575 | c1cc(c(c(c1O)N)[N+](=O)[O-]    | C04272219 | -12.91 | -3.75 | -14.76 | 5.89 | -0.29 |
| 4576 | c1c2c(nc[nH]2)nc(n1)[S-]       | C12955987 | -12.91 | -0.13 | -17.95 | 7.25 | -2.08 |
| 4577 | Cc1[n-]c2cnc2n1                | C13216414 | -12.91 | -4.03 | -13.98 | 6.88 | -1.78 |
| 4578 | Cc1cn2ccsc2n1                  | C15980479 | -12.91 | -1.48 | -14.76 | 7.05 | -3.72 |
| 4579 | c1cc2c(cc1F)nc2                | C16159802 | -12.91 | -2.35 | -14.95 | 5.44 | -1.04 |
| 4580 | c1nc([nH]n1)N                  | C16889962 | -12.91 | -4.42 | -13.7  | 6.78 | -1.57 |
| 4581 | c1(c([nH]c(=S)nn1)[O-])C(=O)NN | C17380711 | -12.91 | -5.46 | -17.01 | 5.73 | 3.83  |
| 4582 | c1cc(cnc1)OCC(F)F              | C20282571 | -12.91 | -3.34 | -11.26 | 4.41 | -2.72 |
| 4583 | Cc1ccc(o1)C@H(C2CO             | C22176510 | -12.91 | -1.77 | -15.3  | 6    | -1.84 |
| 4584 | c1cc(sc1)CC(=O)NN              | C00262467 | -12.9  | -4.87 | -15.64 | 8.36 | -0.74 |
| 4585 | c1c(sc(n1)Cl)C=O               | C01392611 | -12.9  | -3.03 | -12.78 | 4.52 | -1.62 |
| 4586 | c1c[nH]c2c1SCC2=O              | C01601586 | -12.9  | -1.87 | -15.04 | 6.21 | -2.21 |

|      |                                  |           |        |       |        |       |       |
|------|----------------------------------|-----------|--------|-------|--------|-------|-------|
| 4587 | CC(=O)SC                         | C02004049 | -12.9  | -1.03 | -12.82 | 2.73  | -1.77 |
| 4588 | CCOC(=O)[C@@H](C(F)(F)F)F        | C02525720 | -12.9  | -0.85 | -12.71 | 3.97  | -3.31 |
| 4589 | C[C@@H](C(=O)C(F)(F)F)Br         | C04329275 | -12.9  | 1.16  | -13.62 | 2.37  | -2.81 |
| 4590 | c1cc2c([nH]c2nc1)Br              | C05763894 | -12.9  | -4.64 | -10.77 | 5.77  | -3.26 |
| 4591 | C/C=C(Br)/CO                     | C12416533 | -12.9  | -3.21 | -13.57 | 2.69  | 1.19  |
| 4592 | C(#N)c1c([n]-[n]1)N              | C19414036 | -12.9  | -4.62 | -15.63 | 6.38  | 0.98  |
| 4593 | c1ccc2c(c1)NCN2                  | C22000610 | -12.9  | -2.3  | -12.85 | 3.83  | -1.58 |
| 4594 | Cc1ccc(cn1)CC#N                  | C32628157 | -12.9  | -1.86 | -15.28 | 7.72  | -3.47 |
| 4595 | Cn1ccc(n1)C(F)(F)F               | C00160136 | -12.89 | -3.1  | -12.81 | 5.56  | -2.54 |
| 4596 | c1c(cc(cc1F)F)CO                 | C00164758 | -12.89 | -2.82 | -12.17 | 3.43  | -1.32 |
| 4597 | c1cc(c(c(c1F)CO)F)F              | C00396155 | -12.89 | -3.1  | -12.77 | 4.41  | -1.44 |
| 4598 | C=CCSCC=C                        | C01531083 | -12.89 | -0.05 | -12.72 | 1.41  | -1.53 |
| 4599 | c1cc(ccc1CCCl)N                  | C01674982 | -12.89 | -1.77 | -13.78 | 2.15  | 0.51  |
| 4600 | CC1=NCSC1                        | C02038687 | -12.89 | -1.14 | -13.66 | 2.9   | -0.99 |
| 4601 | c1cnc(c(n1)Cl)Cl                 | C02168474 | -12.89 | -1.64 | -14.21 | 4.37  | -1.42 |
| 4602 | c1cc(c(cc1O)F)Br                 | C02510139 | -12.89 | 1.01  | -17.83 | 3.27  | 0.67  |
| 4603 | CCCCN=C=O                        | C02516945 | -12.89 | -0.99 | -13.61 | 1.73  | -0.02 |
| 4604 | CO/C=C/C(F)(F)F                  | C02525274 | -12.89 | -1.25 | -11.85 | 2.18  | -1.97 |
| 4605 | Cc1cnn(c1)CC#N                   | C02537501 | -12.89 | -2.77 | -16.56 | 9.29  | -2.85 |
| 4606 | C/N=C/[C@H]([N+](=O)[O-])\SC     | C04002668 | -12.89 | 0.46  | -15.69 | 3.88  | -1.54 |
| 4607 | CN(C(=O)N)N=O                    | C04202501 | -12.89 | -2.78 | -15.49 | 3.54  | 1.84  |
| 4608 | CC[C@@]1(C(=O)O1)Br              | C05104211 | -12.89 | -0.66 | -11.81 | 1.89  | -2.31 |
| 4609 | C[C@H]([N+](=O)[O-])Cl           | C05735423 | -12.89 | -0.7  | -13.06 | 3.15  | -2.28 |
| 4610 | CC[C@H](C)N(N=O)O                | C05758836 | -12.89 | -1.19 | -14.1  | 2.96  | -0.55 |
| 4611 | c1[nH]c(=O)c(c(n1)N)[N+](=O)[O-] | C08764094 | -12.89 | -1.27 | -18.7  | 5.63  | 1.44  |
| 4612 | CN/C(=N/[N+](=O)[O-])/N          | C20220203 | -12.89 | -4.93 | -16.47 | 9.57  | -1.06 |
| 4613 | c1cc(c(c1F)C#N)F                 | C00164372 | -12.88 | 2.03  | -17.97 | 6.7   | -3.64 |
| 4614 | c1c(nns1)C(=O)NN                 | C01605005 | -12.88 | -3.93 | -16.45 | 5.86  | 1.64  |
| 4615 | c1nc2c(ncnc2nn1)N                | C01667963 | -12.88 | -3.1  | -15.71 | 7.24  | -1.31 |
| 4616 | C=C[C@H](CBr)O                   | C01997857 | -12.88 | -0.61 | -13.49 | 2.16  | -0.94 |
| 4617 | c1cc(ccc1)OCC#N                  | C02023211 | -12.88 | -1.32 | -15.27 | 6.35  | -2.63 |
| 4618 | c1cc(ccc1N)OCCO                  | C02030291 | -12.88 | -2.89 | -15.95 | 5.38  | 0.58  |
| 4619 | c1cccc1C=C(C#N)C#N               | C02381297 | -12.88 | 2.14  | -20.16 | 8.85  | -3.71 |
| 4620 | c1cc(c(cc1F)OC(F)F)N             | C02537714 | -12.88 | -1.31 | -15.99 | 5.27  | -0.86 |
| 4621 | Cc1nc([nH]n1)N                   | C02566399 | -12.88 | -5.46 | -13.92 | 7.97  | -1.46 |
| 4622 | Cc1c(cnn1C)N                     | C02578432 | -12.88 | -2.28 | -14.51 | 4.54  | -0.62 |
| 4623 | Cc1ccc(cc1O)O                    | C04530928 | -12.88 | -1.01 | -16.38 | 4.1   | 0.4   |
| 4624 | C(c1[nH]c(=O)[nH]n1)S            | C12558729 | -12.88 | -3.09 | -17.34 | 7.36  | 0.19  |
| 4625 | Cc1nc([nH]n1)NC(=O)C             | C15081339 | -12.88 | -7.76 | -10.49 | 7.49  | -2.11 |
| 4626 | CC(=O)/C=C/N                     | C17823645 | -12.88 | -2.96 | -13.75 | 4.44  | -0.61 |
| 4627 | c1cc(c(c1n)F)Cl                  | C19615464 | -12.88 | -2.26 | -14.94 | 4.48  | -0.16 |
| 4628 | CC1=C(C(=O)CO1)O                 | C00404230 | -12.87 | -2.72 | -16.29 | 5.46  | 0.68  |
| 4629 | c1c2c(=O)[nH]c(nc2ncn1)[O-]      | C00525630 | -12.87 | -3.34 | -14.84 | 5.26  | 0.06  |
| 4630 | Cc1c(c([n]-[n]1)Cl)[N+](=O)[O-]  | C01225148 | -12.87 | -3.48 | -13.87 | 6.49  | -2    |
| 4631 | CC(C)C(=O)c1ccc(c1)[N+](=O)[O-]  | C01583727 | -12.87 | -0.93 | -12.08 | 4.14  | -4    |
| 4632 | c1c(cnc(c1F)Cl)Br                | C02524878 | -12.87 | -0.79 | -13.83 | 1.81  | -0.05 |
| 4633 | c1cc(c(c1)N)F                    | C03880145 | -12.87 | -2.62 | -12.64 | 1.85  | 0.54  |
| 4634 | CC[C@H](C#CC(F)F)O               | C05468414 | -12.87 | 0.17  | -13.72 | 2.23  | -1.56 |
| 4635 | Cc1c(cco1)N=C=O                  | C12370513 | -12.87 | -1.45 | -13.35 | 2.95  | -1.02 |
| 4636 | c1cc(c(nc1C=O)N)[N+](=O)[O-]     | C21985817 | -12.87 | -5.44 | -11.41 | 5.42  | -1.44 |
| 4637 | c1c(ncnc1)N                      | C25494510 | -12.87 | -0.24 | -15.68 | 4.76  | -1.72 |
| 4638 | CCOc1cc(ncn1)Cl                  | C00730496 | -12.86 | -1.15 | -13.2  | 2.76  | -1.27 |
| 4639 | CC(=O)On1cc(c(=O)[nH]c1=O)F      | C01083182 | -12.86 | -2.19 | -17.73 | 9.64  | -2.58 |
| 4640 | [C@@H]1(C(=O)NC(=O)S1)Br         | C01399352 | -12.86 | 1.54  | -17.93 | 3.46  | 0.07  |
| 4641 | COC(=O)c1ccncc1N                 | C01403568 | -12.86 | -4.03 | -11.68 | 4.03  | -1.18 |
| 4642 | C/C=C/c1ccccn1                   | C01457684 | -12.86 | -0.5  | -11.82 | 3.31  | -3.85 |
| 4643 | c1cscn1                          | C01484626 | -12.86 | -1.51 | -13.21 | 3.08  | -1.21 |
| 4644 | CCSc1nc([nH]n1)N                 | C01939756 | -12.86 | -3.98 | -15.29 | 8.85  | -2.43 |
| 4645 | CCCCCC[N+](=O)[O-]               | C02031533 | -12.86 | -0.08 | -11.96 | 3.38  | -4.19 |
| 4646 | C(C(=O)C(F)F)Br                  | C02579119 | -12.86 | -0.26 | -13.47 | 3.26  | -2.4  |
| 4647 | C[C@H](COC)N=C=S                 | C03276934 | -12.86 | -0.23 | -14.14 | 2.83  | -1.32 |
| 4648 | C=CC[C@H](C(F)F)O                | C08698315 | -12.86 | -1.17 | -12.43 | 1.91  | -1.18 |
| 4649 | Cn1cnc1/C=N/O                    | C13957014 | -12.86 | -3.51 | -15.25 | 6.89  | -0.98 |
| 4650 | C(C(F)F)OC(F)F                   | C14611418 | -12.86 | -0.01 | -13.32 | 2.16  | -1.7  |
| 4651 | [H]N=C(\C)/SCC                   | C16022350 | -12.86 | -0.72 | -12.08 | 1.79  | -1.85 |
| 4652 | Cc1cnc(=O)[nH]1                  | C16953338 | -12.86 | -2.89 | -17.59 | 7.78  | -0.15 |
| 4653 | c1c(c(=O)nc([nH]1)N)[N+](=O)[O-] | C17003686 | -12.86 | -2.04 | -17.17 | 5.87  | 0.49  |
| 4654 | c1c(c(=O)[nH]cn1)O               | C17378546 | -12.86 | -4.31 | -16.31 | 4.99  | 2.77  |
| 4655 | C1C=C[C@H]2[C@H]1CC2=O           | C19230142 | -12.86 | -0.69 | -12.8  | 3.91  | -3.27 |
| 4656 | [C@H-](C(=NH2+)N)C(F)(F)F        | C19482198 | -12.86 | -6.54 | -13.79 | 7.76  | -0.28 |
| 4657 | c1cc(ncn1)[N+](=O)[O-]CBr        | C21985583 | -12.86 | -3.2  | -11.19 | 5.19  | -3.65 |
| 4658 | c1ccn(c1)C(=O)Cl                 | C01557054 | -12.85 | -2.09 | -12.93 | 4.65  | -2.47 |
| 4659 | COC(=O)C=C                       | C01608901 | -12.85 | -1.2  | -13.75 | 4.09  | -2    |
| 4660 | C#CCSCCO                         | C01708308 | -12.85 | -2.18 | -12.98 | 3.35  | -1.05 |
| 4661 | CSCCCN=C=S                       | C01850039 | -12.85 | -0.81 | -15.57 | 2.57  | 0.97  |
| 4662 | C=CCOC(=O)CC#N                   | C02019683 | -12.85 | -3.05 | -15.59 | 8.88  | -3.09 |
| 4663 | c1c(ncn1C(F)F)[N+](=O)[O-]       | C05268974 | -12.85 | -2.18 | -16.72 | 10.34 | -4.29 |
| 4664 | c1c([nH]nc1)NC=O                 | C05386258 | -12.85 | -2.93 | -17.99 | 8.39  | -0.32 |
| 4665 | Cc1cncnc1[N+](=O)[O-]            | C08294978 | -12.85 | -2.78 | -12.34 | 5.14  | -2.87 |
| 4666 | c1ccc2c(c1)[nH]c(=O)O2           | C08801890 | -12.85 | -3.33 | -15.83 | 7.9   | -1.59 |
| 4667 | c1cc(=O)[nH]cc1N                 | C11757519 | -12.85 | -3.22 | -17.64 | 5.28  | 2.72  |
| 4668 | c1cc(c(c1)Br)N                   | C15021415 | -12.85 | -3.45 | -11.03 | 2.49  | -0.86 |
| 4669 | c1cc(ncc1[N+](=O)[O-])CS         | C21985585 | -12.85 | -3.17 | -11.72 | 5.3   | -3.26 |
| 4670 | Cc1cnc(c1)CCl                    | C22016720 | -12.85 | -1.58 | -12.75 | 4.36  | -2.88 |
| 4671 | C1[C@H]([N-]1)C(=O)Cl            | C32016248 | -12.85 | 1.77  | -17.06 | 3.08  | -0.65 |
| 4672 | CCcn1c(ccn1)N                    | C00801646 | -12.84 | -2.26 | -12.83 | 4.47  | -2.23 |
| 4673 | Cn1cnc1C=O                       | C01069169 | -12.84 | -3.29 | -12.89 | 5.34  | -1.99 |
| 4674 | Cc1ccc(cc1)OCC=C                 | C01615713 | -12.84 | -1.52 | -12.27 | 2.52  | -1.57 |
| 4675 | C/C=C/c1ccc(cc1)O                | C01696959 | -12.84 | -0.57 | -15.1  | 2.87  | -0.04 |
| 4676 | COCOC(=O)Cl                      | C01845909 | -12.84 | 1.6   | -16.1  | 3.22  | -1.56 |

|      |                                      |           |        |       |        |       |       |
|------|--------------------------------------|-----------|--------|-------|--------|-------|-------|
| 4677 | c1ccc(c(c1)N)SC(F)F                  | C03440473 | -12.84 | -0.66 | -15.72 | 3.68  | -0.14 |
| 4678 | c1c(c(n[nH]1)C(F)F)Br                | C04243643 | -12.84 | -0.84 | -14.38 | 2.45  | -0.06 |
| 4679 | COC(=O)Nc1cnccc1                     | C05141052 | -12.84 | -0.67 | -17.51 | 6.04  | -0.7  |
| 4680 | Cc1c(=O)[nH]nnc1                     | C05285765 | -12.84 | -0.63 | -17.97 | 4.29  | 1.46  |
| 4681 | CC[C@H](C(F)F)O                      | C08698395 | -12.84 | -1.89 | -12.19 | 1.92  | -0.68 |
| 4682 | CSc1ncc(cn1)C=N/O                    | C13957177 | -12.84 | -0.31 | -18.65 | 7.02  | -0.89 |
| 4683 | c1ccc(c1)NCCS                        | C17325846 | -12.84 | -1.63 | -9.87  | 2.06  | -3.4  |
| 4684 | CCc1ccc(nc1)C                        | C00967331 | -12.83 | -1.17 | -11.12 | 3     | -3.54 |
| 4685 | c1ccc(cc1)C2=N[C@H]2C=O              | C01557438 | -12.83 | 2.15  | -17.82 | 4.33  | -1.5  |
| 4686 | CCCSC(=O)C                           | C01850875 | -12.83 | -0.99 | -11.48 | 2.65  | -3    |
| 4687 | C1C(=O)C=C(S1)C(F)F                  | C02559552 | -12.83 | -0.13 | -13    | 3.16  | -2.87 |
| 4688 | c1c(oc1[O-])CCl                      | C03131391 | -12.83 | -2.94 | -16.24 | 5.6   | 0.75  |
| 4689 | c1c(nns1)/C=N/O                      | C04265462 | -12.83 | -4    | -18.26 | 8.4   | 1.03  |
| 4690 | C(=C/(C(=O)C(F)F)C(F)F)\O            | C04579483 | -12.83 | -4.1  | -15.34 | 7.85  | -1.24 |
| 4691 | COC(=O)CCC(=O)C=[N+]=[N-]            | C04791964 | -12.83 | -2.09 | -14.77 | 6.29  | -2.26 |
| 4692 | C(COCc1c(non1)N)N=[N+]=[N-]          | C05368997 | -12.83 | -3.94 | -17.36 | 6.42  | 2.05  |
| 4693 | c1([nH]nc1)C1N                       | C05567036 | -12.83 | -3.02 | -16.33 | 3.88  | 2.64  |
| 4694 | c1cc(c(c2c1non2)[O-])O               | C06224229 | -12.83 | -3.31 | -16.01 | 5.49  | 1     |
| 4695 | Cc1nc(cnn1)N=[N+]=[N-]               | C08383094 | -12.83 | -1.33 | -15.31 | 3.65  | 0.17  |
| 4696 | c1csc(c1)Br                          | C12959127 | -12.83 | -0.15 | -11.3  | 2.08  | -3.46 |
| 4697 | Cc1ccc(cn1)I                         | C14983205 | -12.83 | -0.26 | -11.54 | 2.39  | -3.43 |
| 4698 | C=CCNc1nccs1                         | C19737071 | -12.83 | -0.62 | -13.58 | 3.99  | -2.61 |
| 4699 | CC/C=C(\C)/[N+](=O)[O-]              | C21304258 | -12.83 | -1.04 | -12.8  | 4.75  | -3.74 |
| 4700 | Cc1ccc(s1)CN=C=O                     | C22861884 | -12.83 | -1.29 | -13.24 | 3.35  | -1.66 |
| 4701 | CC(O)c1cc(n[nH]1)C(F)F               | C26547624 | -12.83 | -4.09 | -10.64 | 4.87  | -2.97 |
| 4702 | CCOCc1c[nH]nc1N                      | C30677777 | -12.83 | -3.12 | -15.48 | 6.27  | -0.5  |
| 4703 | CSc1ncc(s1)N                         | C32914948 | -12.83 | -0.72 | -16.89 | 5.44  | -0.67 |
| 4704 | Cc1c(c(n[nH]1)C)N                    | C00039481 | -12.82 | -2.06 | -14.86 | 4.29  | -0.18 |
| 4705 | CC(=O)C=C(N)SC                       | C00273377 | -12.82 | -3.9  | -14.47 | 6.99  | -1.44 |
| 4706 | CCOC(=O)c1c(non1)N                   | C01052721 | -12.82 | -2.1  | -12.22 | 3.03  | -1.54 |
| 4707 | C=C(C#N)C(F)F                        | C01755904 | -12.82 | -3.09 | -12.68 | 5.44  | -2.49 |
| 4708 | c1cncc1N                             | C02168333 | -12.82 | -2.93 | -13.95 | 4.7   | -0.64 |
| 4709 | c1cncc(c1C=O)O                       | C02244273 | -12.82 | -3.72 | -15.58 | 5.69  | 0.79  |
| 4710 | c1ccc(nc1)COF                        | C02384040 | -12.82 | -2.02 | -17.53 | 5.48  | 1.25  |
| 4711 | Cc1ccc(o1)C(=O)Cl                    | C02521277 | -12.82 | -1.92 | -11.93 | 3.9   | -2.87 |
| 4712 | C(/C=C/C(F)F)Br                      | C02526364 | -12.82 | -2.04 | -13.1  | 3.07  | -0.75 |
| 4713 | c1c(cn(n1)CC#N)[N+](=O)[O-]          | C02537510 | -12.82 | -3.89 | -18.96 | 12.88 | -2.85 |
| 4714 | c1cc(c(c1C#N)F)O                     | C02562249 | -12.82 | -1.11 | -17.36 | 7.16  | -1.51 |
| 4715 | CCOC(=O)SC(=[NH2+])N                 | C04642969 | -12.82 | -2.73 | -16.48 | 5.23  | 1.17  |
| 4716 | c1nc(c(n1)C(=O)NO)N                  | C04809156 | -12.82 | -5.17 | -19.31 | 8.28  | 3.39  |
| 4717 | CCOC/C=C\COC                         | C05808185 | -12.82 | -1.34 | -12.84 | 2.45  | -1.09 |
| 4718 | COC(=O)CC(=O)C(F)F                   | C05996866 | -12.82 | 1.79  | -16.49 | 6.48  | -4.6  |
| 4719 | c1ccc(cc1)N2NC(=O)SN2                | C06475547 | -12.82 | -3.02 | -11.91 | 4.02  | -1.92 |
| 4720 | c1cc(c(nc1)CO)F                      | C12370202 | -12.82 | -0.24 | -17.94 | 5.39  | -0.03 |
| 4721 | COCCn1cc[nH+]c1                      | C14608646 | -12.82 | -2.07 | -12.6  | 4.63  | -2.78 |
| 4722 | c1nc([nH]n1)SCC#N                    | C19847558 | -12.82 | -3.12 | -15.24 | 8.79  | -3.25 |
| 4723 | c1cncc(c1)C(=O)NN                    | C00010573 | -12.81 | -3.24 | -16.7  | 6.85  | 0.29  |
| 4724 | c1cc(oc1)C(=O)CC#N                   | C00157314 | -12.81 | 0.87  | -20.18 | 9.28  | -2.78 |
| 4725 | Cc1ccc(c(c1F)F)O                     | C02382373 | -12.81 | -1.9  | -15.42 | 5.17  | -0.66 |
| 4726 | c1c(sc1)Br)C=O                       | C02510761 | -12.81 | -3.21 | -12.41 | 4.52  | -1.71 |
| 4727 | CC(=O)CCCCl                          | C02556912 | -12.81 | -0.63 | -12.68 | 4.23  | -3.73 |
| 4728 | c1ccc(sc1C(=O)N)Br                   | C02750706 | -12.81 | -2.69 | -13.84 | 4.45  | -0.73 |
| 4729 | C(SC(F)F)FCI                         | C04531691 | -12.81 | -1.36 | -11.84 | 2.03  | -1.64 |
| 4730 | CO/C(=N)/[NH+](=O)[O-]/[NH-]         | C04901330 | -12.81 | -2.12 | -17.19 | 4.34  | 2.16  |
| 4731 | c1[nH]c(c(n1)C#N)N                   | C08628646 | -12.81 | -5.71 | -15.19 | 9.21  | -1.12 |
| 4732 | CCNc1nc(nn1)N                        | C09601303 | -12.81 | -3.49 | -12.34 | 4.94  | -1.92 |
| 4733 | CC(=O)c1cnsc1                        | C12650585 | -12.81 | -2.45 | -14.31 | 5.7   | -1.76 |
| 4734 | Cc1c(=O)[nH]ccn1                     | C14491607 | -12.81 | -4.3  | -16.94 | 8.66  | -0.23 |
| 4735 | c1ccc([nH]c(=O)c1)N                  | C14982071 | -12.81 | -3.43 | -16.62 | 5.15  | 2.09  |
| 4736 | COC1=C(C(C1(F)F)F)OC                 | C16082663 | -12.81 | -2.75 | -10.43 | 2.5   | -2.14 |
| 4737 | C1C(=NNC(=O)S1)CCl                   | C20216358 | -12.81 | -1.92 | -18.51 | 8.59  | -0.96 |
| 4738 | c1cc(c(oc1N)F)Sc2[nH]ncn2            | C20474968 | -12.81 | -1.77 | -16.23 | 8.01  | -2.83 |
| 4739 | Cc1nc(c(s1)CCl                       | C22861726 | -12.81 | -1.27 | -12.22 | 3.66  | -2.98 |
| 4740 | CCC1=C(C(=O)CC1)O                    | C25695693 | -12.81 | -1.83 | -15.05 | 5.39  | -1.33 |
| 4741 | c1cc(sc1)C(=S)N                      | C00166060 | -12.8  | -1.94 | -17.04 | 8.28  | -2.1  |
| 4742 | CCC(=O)C(C(F)F)F                     | C01675403 | -12.8  | -0.57 | -11.72 | 2.46  | -2.97 |
| 4743 | CCOCCI                               | C02507815 | -12.8  | -1.16 | -11.37 | 1.81  | -2.09 |
| 4744 | CNC(=O)N(C)N=O                       | C03793045 | -12.8  | -2.82 | -14.46 | 3.75  | 0.73  |
| 4745 | C(C(=O)Cl)Br                         | C04521278 | -12.8  | 0.15  | -14.18 | 3.14  | -1.91 |
| 4746 | CC[C@H](C)S                          | C04775629 | -12.8  | -0.18 | -10.66 | 0.78  | -2.73 |
| 4747 | CC(=C)/C=N/O                         | C13508699 | -12.8  | -4.17 | -12.75 | 4.43  | -0.3  |
| 4748 | C1C=CC[C@H]2[C@H]1O2                 | C17022497 | -12.8  | -0.93 | -12.87 | 2.77  | -1.77 |
| 4749 | C1=C2C(=NC(=S)N=C2[O-])N=N1          | C18151915 | -12.8  | -3.73 | -15.36 | 6.58  | -0.29 |
| 4750 | Cc1[nH]cc(c1)C(=O)C                  | C22000856 | -12.8  | -4.49 | -13.86 | 7.53  | -1.99 |
| 4751 | CC(C)C(=O)N=C=S                      | C22143666 | -12.8  | -0.74 | -13.79 | 3.56  | -1.83 |
| 4752 | COc1ccc(cc1)C#N                      | C00159092 | -12.79 | -1.01 | -13.02 | 4.26  | -3.02 |
| 4753 | c1cc(ccc1)C(=O)CCl                   | C01703019 | -12.79 | 0.85  | -18.14 | 8.72  | -4.21 |
| 4754 | CCOC(=O)C(F)F                        | C02040590 | -12.79 | -0.66 | -14.04 | 4.48  | -2.57 |
| 4755 | c1cncc(c1C#N)Cl                      | C02547813 | -12.79 | -3.13 | -11.3  | 4.24  | -2.6  |
| 4756 | c1c([nH]nc1)C(F)F                    | C02559437 | -12.79 | -2.62 | -13.59 | 5.6   | -2.08 |
| 4757 | CC(=O)c1cc(oc1)[N+](=O)[O-]          | C04180505 | -12.79 | 0.06  | -14.02 | 2.94  | -1.77 |
| 4758 | CN(C(=O)C)OC                         | C04291205 | -12.79 | -1.26 | -13.98 | 3.46  | -1.01 |
| 4759 | c1ncn(n1)C[C@H]2CO2                  | C11919571 | -12.79 | -3.55 | -14.22 | 7.24  | -2.25 |
| 4760 | COCC1CCCC1N                          | C13346815 | -12.79 | -1.04 | -12.94 | 3.01  | -1.82 |
| 4761 | CCO/C=C\C                            | C16892512 | -12.79 | -0.55 | -11.46 | 1.67  | -2.46 |
| 4762 | c1c2c(ncn1)nc([nH]2)CO               | C17311339 | -12.79 | -4.37 | -15.63 | 6.94  | 0.26  |
| 4763 | CSc1[nH]c(=O)c(c1)N                  | C17315889 | -12.79 | -1.82 | -17.13 | 6.04  | 0.13  |
| 4764 | C(=C([NH+](=O)[O-])[N+](=O)[O-])(N)N | C19324383 | -12.79 | -6.24 | -17.13 | 11.93 | -1.36 |
| 4765 | c1cc(oc1)c2cc(n[nH]2)C(F)F           | C26547627 | -12.79 | 0.62  | -17.48 | 6.83  | -2.77 |
| 4766 | c1cc(oc1)CC[N+](=O)[O-]              | C01733890 | -12.78 | -0.27 | -13.58 | 4.44  | -3.38 |

|      |                             |           |        |       |        |       |       |
|------|-----------------------------|-----------|--------|-------|--------|-------|-------|
| 4767 | c1cc(ccc1[C@@H]2CO2)Cl      | C02571277 | -12.78 | -2.36 | -14.26 | 3.48  | 0.36  |
| 4768 | C=CCN1C(=O)C(=O)NC1=O       | C02647845 | -12.78 | -0.81 | -16.43 | 4.51  | -0.06 |
| 4769 | C=C(c1cccnc1)NNC=O          | C03250374 | -12.78 | 1.16  | -19.96 | 7.17  | -1.15 |
| 4770 | c1ccc(cc1)C(=O)C=[N+]=[N-]  | C04536622 | -12.78 | 1.76  | -19.39 | 6.45  | -1.6  |
| 4771 | c1ccc(cc1)C2=NCOC2=O        | C04726942 | -12.78 | -1.32 | -20.38 | 5.57  | 3.34  |
| 4772 | C1(C(OC1(F)F)F)F            | C05187447 | -12.78 | 0.01  | -10.83 | 0.38  | -2.35 |
| 4773 | c1ccn2c(c1)nc2N             | C05386220 | -12.78 | -2.9  | -13.96 | 6.84  | -2.77 |
| 4774 | c1ccc(c(c1)NCCO)F           | C13517039 | -12.78 | -3.21 | -13.38 | 4.35  | -0.54 |
| 4775 | c1cc2c(c(c1)F)c(n[nH]2)O    | C14983441 | -12.78 | -5.77 | -14.73 | 6.67  | 1.05  |
| 4776 | C/C=C(Cl)O                  | C16343299 | -12.78 | -2.68 | -12.33 | 2.18  | 0.05  |
| 4777 | C/C=N/CC(F)F                | C19795290 | -12.78 | -2.35 | -12.42 | 3.4   | -1.41 |
| 4778 | c1cc(c(cc1C=O)N)F           | C21981687 | -12.78 | -3.95 | -13.07 | 5.85  | -1.61 |
| 4779 | CCc1cc(ncn1)Cl              | C26420701 | -12.78 | -1.73 | -10.87 | 3.14  | -3.33 |
| 4780 | CCc1c(c[nH]n1)N             | C26545509 | -12.78 | -2.21 | -15.86 | 5.51  | -0.22 |
| 4781 | c1cc(cc1)C2=CC(=O)CC2       | C32005602 | -12.78 | 0.7   | -15.51 | 5.79  | -3.76 |
| 4782 | Cn1c(cc(=O)[nH]c1=O)N       | C00154763 | -12.77 | -5.97 | -17.4  | 9.96  | 0.63  |
| 4783 | Cc1cccnc1Cl                 | C00403383 | -12.77 | -0.63 | -13    | 3.74  | -2.87 |
| 4784 | CCC[C@H](C=C)O              | C01575584 | -12.77 | -0.32 | -12.63 | 1.44  | -1.26 |
| 4785 | c1cc(oc1)/C=C/C=O           | C01577145 | -12.77 | -2.87 | -14.88 | 7.79  | -2.81 |
| 4786 | CCn1c(=O)cn[nH]c1=O         | C01757767 | -12.77 | 0.74  | -18.52 | 5.23  | -0.22 |
| 4787 | Cc1ccc(cc1)SOC              | C01849780 | -12.77 | -1.45 | -14.85 | 3.32  | 0.21  |
| 4788 | CC(=O)c1ccsc1               | C02573578 | -12.77 | -1.72 | -13.07 | 5.64  | -3.63 |
| 4789 | CCOC(=O)CSC(F)F             | C02646155 | -12.77 | -0.62 | -12.85 | 4.28  | -3.58 |
| 4790 | c1c(c(c(n1)Cl)Cl)[O-]       | C03014162 | -12.77 | -1.54 | -15.47 | 5.55  | -1.31 |
| 4791 | c1(c(c(c(c1F)F)F)F)N=O      | C03847087 | -12.77 | -0.51 | -10.22 | 1.04  | -3.09 |
| 4792 | c1c[nH]c(=O)cc1C=O          | C04202749 | -12.77 | -4.83 | -15.57 | 8.52  | -0.9  |
| 4793 | CC(=Nn1cnnc1)C              | C05225643 | -12.77 | -2.39 | -14.55 | 7.95  | -3.78 |
| 4794 | CN1C(=O)C(=O)N(C1=O)C       | C05965946 | -12.77 | -0.4  | -16.78 | 4.76  | -0.35 |
| 4795 | CCn1cc(n1)[N+](=O)[O-]      | C15782786 | -12.77 | -3.43 | -14.8  | 10.42 | -4.95 |
| 4796 | c1ann2n1NC(=O)CC2           | C18558879 | -12.77 | -2.51 | -15.23 | 6.05  | -1.08 |
| 4797 | Cn1ccc(n1)N                 | C19088827 | -12.77 | -3.42 | -15.02 | 5.18  | 0.49  |
| 4798 | c1ccnc(c1)CCC=O             | C19682804 | -12.77 | -3.72 | -11.95 | 5.96  | -3.06 |
| 4799 | C1CC(=CC(=O)C1)Cl           | C20160223 | -12.77 | -0.3  | -13.88 | 4.57  | -3.16 |
| 4800 | C/C=C/CSC                   | C20231229 | -12.77 | -0.74 | -10.03 | 1.48  | -3.48 |
| 4801 | CNC(=O)c1ccccc1             | C20282841 | -12.77 | -2.56 | -16.14 | 6.8   | -0.87 |
| 4802 | c1c(c[nH]c(=O)c1N)Cl        | C21981960 | -12.77 | -3.59 | -19.26 | 9.23  | 0.85  |
| 4803 | CC(=O)C(=O)N(C)OC           | C21986919 | -12.77 | -1.4  | -13.44 | 4.14  | -2.08 |
| 4804 | c1ccc(cc1)C(=S)N            | C00049654 | -12.76 | -1.37 | -17.67 | 9.12  | -2.85 |
| 4805 | Cc1[nH]c2cccc2n1            | C00164607 | -12.76 | -3.07 | -12.97 | 6.42  | -3.14 |
| 4806 | COc1ccc(cc1)C#C             | C00984394 | -12.76 | 0.04  | -12.64 | 3.5   | -3.66 |
| 4807 | c1c(sc(n1)Cl)CC#N           | C01387125 | -12.76 | -2.49 | -15.28 | 7.75  | -2.74 |
| 4808 | c12c([nH]c1=O)nc1ann2[O-]   | C01666582 | -12.76 | -1.29 | -19.41 | 6.32  | 1.61  |
| 4809 | CC(=O)C1=CCCCC1             | C03860149 | -12.76 | 1.81  | -14.54 | 3.8   | -3.83 |
| 4810 | C=C[C@]P@[H](=O)[O-]        | C03958468 | -12.76 | -5.79 | -13.34 | 6.97  | -0.61 |
| 4811 | c1(c(snn1)NN=O)C(=O)N       | C05836055 | -12.76 | -2.22 | -16.06 | 2.8   | 2.73  |
| 4812 | C1CC(=C(C1)[O-])C(=O)C(F)F  | C12394856 | -12.76 | -2.92 | -13.15 | 5.99  | -2.68 |
| 4813 | c1ccc(cc1)SCN=[N+]=[N-]     | C12956364 | -12.76 | -0.78 | -13.05 | 2.59  | -1.52 |
| 4814 | Cc1cc(cnc1)CCl              | C15021787 | -12.76 | -0.42 | -12.11 | 3.34  | -3.57 |
| 4815 | c1nnc(s1)N                  | C17744119 | -12.76 | -4.62 | -14.11 | 5.86  | 0.1   |
| 4816 | COc(=O)c1c(cno1)Br          | C26547711 | -12.76 | 0.82  | -14.18 | 3.1   | -2.49 |
| 4817 | c1ccc2c(c1)CCN2             | C00967454 | -12.75 | -1.37 | -10.8  | 2.34  | -2.92 |
| 4818 | CC(=O)CC(=C)C               | C01631227 | -12.75 | -1.11 | -13.02 | 3.04  | -1.65 |
| 4819 | COc(=O)CCC(=O)Cl            | C01712453 | -12.75 | -0.98 | -13.23 | 3.95  | -2.49 |
| 4820 | c1cc(c(cc1)F)CO             | C02512516 | -12.75 | -1.13 | -14.44 | 2.34  | 0.48  |
| 4821 | CCOCCCl                     | C02522731 | -12.75 | -0.59 | -11.65 | 2.24  | -2.75 |
| 4822 | Cc1c(non1)C(=O)C(=N[O-])/Br | C03164846 | -12.75 | -3.25 | -12.73 | 3.45  | -0.22 |
| 4823 | CC(=O)NCC1CCCC1             | C05260754 | -12.75 | -2.67 | -15.91 | 7.13  | -1.29 |
| 4824 | c1c[nH]c(=O)c2c1sc2         | C16972315 | -12.75 | -2.66 | -15.25 | 5.2   | -0.04 |
| 4825 | C=CCCC(=O)Cl                | C21997308 | -12.75 | -0.57 | -11.78 | 3.23  | -3.63 |
| 4826 | Cc1ccc(c(c1)N)C(=O)N        | C00153352 | -12.74 | -2.82 | -15.31 | 5.32  | 0.06  |
| 4827 | c1ccc(cc1)COC(=O)NN         | C00403316 | -12.74 | 0.07  | -17.56 | 5.78  | -1.04 |
| 4828 | CC(=O)C=C                   | C01574309 | -12.74 | -0.83 | -13.18 | 3.75  | -2.48 |
| 4829 | C(CBr)C(=O)N                | C01664836 | -12.74 | -4.7  | -13.08 | 4.79  | 0.25  |
| 4830 | c1ccc(c1)CO                 | C02037862 | -12.74 | -1.76 | -15.3  | 4.18  | 0.14  |
| 4831 | CO[C@H]1CCC=C1              | C02143305 | -12.74 | -0.32 | -13.54 | 1.62  | -0.51 |
| 4832 | CC(=O)N=C=S                 | C02386803 | -12.74 | -1.28 | -14.74 | 3.95  | -0.67 |
| 4833 | c1ccc(c(c1)NC(=O)C(=O)N)F   | C03072950 | -12.74 | -1.86 | -18.13 | 5.43  | 1.83  |
| 4834 | c1cc(ncc1S)S                | C03130114 | -12.74 | -1.86 | -16.59 | 4.79  | 0.91  |
| 4835 | CCn1ccc(n1)C                | C09426710 | -12.74 | -1.06 | -13.49 | 4.67  | -2.86 |
| 4836 | C/C(=NN)/c1ccco1            | C17047406 | -12.74 | -2.96 | -12.37 | 3.9   | -1.31 |
| 4837 | C(=N(O))(N)/C(=N(O)N        | C18119586 | -12.74 | -6.49 | -14.81 | 4.41  | 4.15  |
| 4838 | c1cc2nncn2nc1N              | C18555647 | -12.74 | -4.42 | -16.19 | 9.83  | -1.96 |
| 4839 | c1ccn(c(=O)c1)CCBr          | C19416026 | -12.74 | -1.6  | -15.66 | 8.29  | -3.77 |
| 4840 | CCOC1ccnc(c1)F              | C21982022 | -12.74 | -0.14 | -14.58 | 4.22  | -2.25 |
| 4841 | C=CCN(CC=C)C=O              | C00394527 | -12.73 | -0.12 | -14.52 | 5.03  | -3.13 |
| 4842 | c1(c(nsc1)Cl)Cl)N           | C01064136 | -12.73 | -3.05 | -13.26 | 1.47  | 2.1   |
| 4843 | CC(=O)OCC#C                 | C01845917 | -12.73 | 0.05  | -14.68 | 4.63  | -2.73 |
| 4844 | Cc1ccc(cc1)N=C=O            | C01845938 | -12.73 | 0.12  | -13.69 | 1.95  | -1.11 |
| 4845 | C#CCOCC#C                   | C02029723 | -12.73 | -0.1  | -14.62 | 4.49  | -2.5  |
| 4846 | CCc1cnc(n1)Cl               | C02569912 | -12.73 | -1.95 | -12.08 | 4.21  | -2.91 |
| 4847 | C(/C(=N)/N)(Cl)Cl           | C04203874 | -12.73 | -3.02 | -12.26 | 2.77  | -0.22 |
| 4848 | c1cc(cnc1)c2cc[nH]2         | C09238272 | -12.73 | -0.84 | -15.08 | 5.14  | -1.95 |
| 4849 | c1cc(ncc1C(=O)N)C#N         | C15772047 | -12.73 | -3.27 | -17.36 | 7.76  | 0.14  |
| 4850 | COc(=O)Cn1ccnc1             | C20362220 | -12.73 | -0.73 | -17.33 | 9.17  | -3.85 |
| 4851 | c1cc(oc1)CO                 | C01648266 | -12.72 | -2.71 | -14.68 | 4.61  | 0.06  |
| 4852 | C=Nc1ccc(cc1)Cl             | C01654174 | -12.72 | 1.61  | -17.11 | 3.56  | -0.79 |
| 4853 | C1C=C[C@H]2[C@@H]1C(=O)C2   | C01669121 | -12.72 | -0.68 | -12.57 | 3.74  | -3.21 |
| 4854 | CCOC(=O)C(=O)CBr            | C01691048 | -12.72 | -0.12 | -12.86 | 3.57  | -3.32 |
| 4855 | C=C1COCCO1                  | C01708305 | -12.72 | -0.33 | -14.13 | 2.79  | -1.05 |
| 4856 | Cn1cncn1N                   | C03194504 | -12.72 | -4.39 | -14.4  | 9.15  | -3.08 |

|      |                                   |           |        |       |        |      |       |
|------|-----------------------------------|-----------|--------|-------|--------|------|-------|
| 4857 | c1cc(ccc1N(N=O)O)Cl               | C05046692 | -12.72 | -0.36 | -14.4  | 2.48 | -0.45 |
| 4858 | CC(=O)c1cnc([nH]1)Cl              | C12647654 | -12.72 | 1.76  | -17.98 | 5.3  | -1.81 |
| 4859 | [C@@H](C(F)(F)F)(OC(F)(F)Cl)Cl    | C14628419 | -12.72 | 0.09  | -11.6  | 1.27 | -2.47 |
| 4860 | Cn1cnc1C=O                        | C00158990 | -12.71 | -2.86 | -15.34 | 7.95 | -2.46 |
| 4861 | [H]/N=Nc1ccc(cc1)Br               | C00409254 | -12.71 | -1.84 | -13.97 | 1.87 | 1.23  |
| 4862 | C1(=O)C(=O)NC(=O)N=C1[O-]         | C01631379 | -12.71 | 0.27  | -19.93 | 5.69 | 1.26  |
| 4863 | Cc1c(c[n1]C)N                     | C02388744 | -12.71 | -2.75 | -13.94 | 4.7  | -0.73 |
| 4864 | c1cc(c(c1O)F)F)O                  | C02525459 | -12.71 | -4.14 | -15.65 | 6.19 | 0.89  |
| 4865 | Cc1c(=O)[nH]c(=O)[nH]c1F          | C02559882 | -12.71 | -2.05 | -16.37 | 5.11 | 0.6   |
| 4866 | c1cnc(cc1)F                       | C02598036 | -12.71 | -1.28 | -14.24 | 2.81 | 0.01  |
| 4867 | c1(=O)c(n[nH]c(=O)[nH]1)SC(F)F    | C03068995 | -12.71 | -0.33 | -18.95 | 5.74 | 0.83  |
| 4868 | c1cc(c(c1)F)N=O)F                 | C04576633 | -12.71 | -2.82 | -15.2  | 6.76 | -1.45 |
| 4869 | Cc1ccnc(c1)NN=O                   | C13213092 | -12.71 | -4.22 | -12.96 | 6.3  | -1.84 |
| 4870 | c1cnc(cn1)CN[NH3+]                | C19271336 | -12.71 | -1.6  | -16.64 | 4.25 | 1.27  |
| 4871 | c1cc(cc(c1)F)NCC#N                | C20051118 | -12.71 | -4.07 | -12.04 | 6.43 | -3.03 |
| 4872 | c1cc(oc1)/C=C/C(=O)/[O-]          | C26515316 | -12.71 | 1.89  | -18.96 | 6.67 | -2.31 |
| 4873 | c1cc(oc1)/C=C/I                   | C30677960 | -12.71 | 0.37  | -12.24 | 2.91 | -3.75 |
| 4874 | c1cc(ccc1/C=C/[N+](=O)[O-])O      | C00039663 | -12.7  | -1.18 | -14.85 | 6.11 | -2.78 |
| 4875 | CSc1ccc(cc1N)Cl                   | C00159318 | -12.7  | -2.75 | -13.14 | 2.33 | 0.86  |
| 4876 | C1C(=S)NC(=O)S1                   | C01469722 | -12.7  | 0.42  | -16.42 | 4.25 | -0.94 |
| 4877 | CC(=O)c1cccnc1                    | C01655483 | -12.7  | 2.34  | -17    | 4.58 | -2.63 |
| 4878 | CC(=O)ONC(=O)C(=O)N               | C01686534 | -12.7  | -1.65 | -18.66 | 7.35 | 0.26  |
| 4879 | CCO/C=C/C                         | C01693281 | -12.7  | -0.63 | -11.35 | 1.8  | -2.52 |
| 4880 | CC/C=C/CC=C=O                     | C01999333 | -12.7  | -0.47 | -12.53 | 4.03 | -3.73 |
| 4881 | COCOCBr                           | C02244257 | -12.7  | -1.19 | -12.71 | 2.82 | -1.62 |
| 4882 | c1cc(ccc1CNC(=O)N)N               | C02512909 | -12.7  | -0.12 | -20.75 | 6.91 | 1.26  |
| 4883 | CC(=O)CC1=C(C)C=C1                | C02519746 | -12.7  | -1.33 | -11.63 | 4.4  | -4.14 |
| 4884 | C=C(C)C(N+)(=O)[O-]               | C02557054 | -12.7  | -0.22 | -14.78 | 3.67 | -1.37 |
| 4885 | c1c(cc(cc1F)Br)F)N                | C02560292 | -12.7  | -0.02 | -16.56 | 3.66 | 0.22  |
| 4886 | C#CCCC(=O)Cl                      | C02574131 | -12.7  | -0.62 | -13.12 | 4.6  | -3.56 |
| 4887 | C=C[C@H](c1cccnc1)O               | C02575264 | -12.7  | -3.13 | -9.15  | 2.31 | -2.73 |
| 4888 | c1cc(c(cc1O)Br)F                  | C02580752 | -12.7  | 0.14  | -16.73 | 3.27 | 0.62  |
| 4889 | Cc1c(nc2nncn2n1)[O-]              | C03888383 | -12.7  | -0.93 | -15.24 | 6.58 | -3.11 |
| 4890 | CCO/N=C/c1c(ncn1)N)N              | C04091469 | -12.7  | -1.32 | -14.75 | 2.85 | 0.52  |
| 4891 | C1=C=CCON1                        | C05493277 | -12.7  | -1.35 | -13.36 | 2.42 | -0.41 |
| 4892 | c1cc(oc1)/C=C/C(=O)N=[N+]=[N-]    | C15022779 | -12.7  | 0.24  | -17.16 | 4.3  | -0.08 |
| 4893 | c1cn(cn1)S(=O)=O                  | C15767161 | -12.7  | -2.46 | -17.61 | 7.23 | 0.14  |
| 4894 | c1cn2cc(nc2n1)Br                  | C20358109 | -12.7  | 0.01  | -14.95 | 5.04 | -2.8  |
| 4895 | COC(=O)[C@H](c1cccnc1)O           | C00391162 | -12.69 | -0.7  | -13.89 | 4.62 | -2.73 |
| 4896 | c1cc(ccc1CN=C=S)F                 | C01841066 | -12.69 | -1.33 | -10.18 | 2.63 | -3.82 |
| 4897 | c1cc(ccc1F)C(=O)Cl)F              | C02539281 | -12.69 | 0.89  | -15.66 | 4.07 | -2    |
| 4898 | c1cc2c(cc1N)OC(O2)(F)F            | C02556425 | -12.69 | -0.54 | -15.43 | 4.4  | -1.13 |
| 4899 | COC(=O)Cl                         | C03860600 | -12.69 | -1.45 | -12    | 2.18 | -1.42 |
| 4900 | C=C/C=C/C=O                       | C04758198 | -12.69 | -1.35 | -14.05 | 4.91 | -2.2  |
| 4901 | c1n([nH]n1)CC(=O)C(=O)S           | C04879756 | -12.69 | -3.78 | -14.94 | 6.13 | -0.1  |
| 4902 | c1cncnc1C(=O)/C=N/O               | C04900709 | -12.69 | -3.78 | -16.84 | 8.93 | -1    |
| 4903 | C1CC(=O)NC1                       | C14684428 | -12.69 | -4.41 | -12.36 | 2.61 | 1.47  |
| 4904 | c1c(cc(cc1F)F)CCO                 | C16698356 | -12.69 | -0.73 | -12.8  | 3    | -2.16 |
| 4905 | c1nnc(n1)CO                       | C01504277 | -12.68 | -4.79 | -15.47 | 6    | 1.58  |
| 4906 | CCOC(=O)C(=C(C)F)F)F              | C01668037 | -12.68 | 0.42  | -12.52 | 3.49 | -4.07 |
| 4907 | Cc1cncnc1=O                       | C01733139 | -12.68 | -2.39 | -17.64 | 8.22 | -0.87 |
| 4908 | c1cc(c(cc1Br)O)O                  | C02018046 | -12.68 | -0.7  | -15.95 | 4.07 | -0.11 |
| 4909 | Cc1ccc(cc1)F)Br                   | C02384010 | -12.68 | 1.25  | -15.3  | 4.35 | -2.97 |
| 4910 | c1c(cn(n1)C(F)F)N+](=O)[O-]       | C02534800 | -12.68 | -0.58 | -14.84 | 5.31 | -2.57 |
| 4911 | CCn1ccc(n1)[N+](=O)[O-]           | C02537792 | -12.68 | -1.46 | -16.34 | 8.94 | -3.81 |
| 4912 | Cc1nnc(s1)[S-]                    | C04528607 | -12.68 | -2.52 | -13.61 | 4.71 | -1.26 |
| 4913 | C#CCO[C@H](H)1CCCO1               | C04529398 | -12.68 | -0.88 | -12.47 | 3.83 | -3.16 |
| 4914 | C/C(=N/c1[nH]ncn1)/O              | C05431543 | -12.68 | -5.72 | -13.79 | 9.33 | -2.5  |
| 4915 | c1(c(ncn1)N)c2nncn2[O-]           | C06452769 | -12.68 | -3.15 | -16.82 | 5.15 | 2.14  |
| 4916 | c1(c(n[s1]Cl)S                    | C06523907 | -12.68 | -1.87 | -14.44 | 1.68 | 1.96  |
| 4917 | c1ccc(c(c1)/C=N/O)O               | C06661419 | -12.68 | -3.72 | -14.32 | 5.06 | 0.29  |
| 4918 | c1cc(oc1CO)Br                     | C08727831 | -12.68 | -2.76 | -13.62 | 4.24 | -0.53 |
| 4919 | c1cnc(c(c1Cl)C#N                  | C14628929 | -12.68 | -2.49 | -11.91 | 4.29 | -2.57 |
| 4920 | CCn1c(c(cn1)C)N                   | C19091012 | -12.68 | -3.14 | -11.99 | 4.62 | -2.17 |
| 4921 | Cc1cc(s1)C=O                      | C20443687 | -12.68 | -1.86 | -13.82 | 4.78 | -1.77 |
| 4922 | CCOC(=O)OCCl                      | C21989293 | -12.68 | -2.42 | -11.57 | 4.01 | -2.7  |
| 4923 | C[C@@H](c1cccnc1)O                | C00393774 | -12.67 | -1.26 | -14.49 | 3.84 | -0.76 |
| 4924 | CCCC(=O)OC                        | C00404765 | -12.67 | -0.38 | -13.17 | 3.62 | -2.73 |
| 4925 | Cc1ccc(cc1)O)Br                   | C01583783 | -12.67 | -1.92 | -14.43 | 2.82 | 0.86  |
| 4926 | COC(=O)c1csnn1                    | C01632276 | -12.67 | 1.06  | -18.14 | 5.67 | -1.26 |
| 4927 | [H]/N=C/1\CC(=NN1C(=O)N)C         | C01659742 | -12.67 | -3.99 | -16.35 | 5.17 | 2.51  |
| 4928 | COCCl                             | C01699870 | -12.67 | 0.36  | -13.02 | 1.85 | -1.86 |
| 4929 | CCCCO=C                           | C01845732 | -12.67 | -0.35 | -12.46 | 1.62 | -1.48 |
| 4930 | Cc1ccc(cc1)CC=O                   | C01851033 | -12.67 | -1.57 | -13.84 | 4.34 | -1.6  |
| 4931 | c1cnc(c1)OC(=O)C(F)F)F            | C02557083 | -12.67 | -0.28 | -14.55 | 5.34 | -3.17 |
| 4932 | C1CC1C(=N)NN                      | C04202550 | -12.67 | -2.32 | -13.11 | 3.23 | -0.47 |
| 4933 | CC(C)C/C(=C/C(=O)C(F)F)F/[O-]     | C04430782 | -12.67 | -1.49 | -9.98  | 2.23 | -3.43 |
| 4934 | C(c1c(nc[n+]1)[O-])[N+](=O)[O-])O | C04481279 | -12.67 | 0.67  | -18.75 | 6.55 | -1.14 |
| 4935 | c1cnc2nc(nn2c1)N                  | C04487619 | -12.67 | -1.41 | -18.51 | 11.1 | -3.85 |
| 4936 | c1c(c[nH]1)N                      | C05784074 | -12.67 | -3.2  | -14.01 | 3.8  | 0.74  |
| 4937 | COCc1ccnc(c1)N                    | C06643273 | -12.67 | -2.99 | -13.07 | 4.04 | -0.65 |
| 4938 | Cc1nc(cs1)C(F)F)F                 | C08614797 | -12.67 | -2.33 | -11.87 | 4.22 | -2.69 |
| 4939 | C/C(=C/[N+](=O)[O-])/C(=O)OC      | C08655546 | -12.67 | 0.62  | -14.02 | 3.9  | -3.16 |
| 4940 | COC(=O)c1ccc(cc1)C=O              | C08728864 | -12.67 | 0.28  | -16.04 | 5.47 | -2.39 |
| 4941 | c1c(c(c[nH]c1=O)Cl)[O-]           | C13831809 | -12.67 | -2.15 | -17.99 | 4.51 | 2.96  |
| 4942 | Cc1ncc(cn1)O                      | C14982942 | -12.67 | -1.27 | -15.94 | 4.29 | 0.24  |
| 4943 | Cc1cc(nc1)C=O                     | C20443769 | -12.67 | -1.79 | -14.68 | 5.31 | -1.51 |
| 4944 | C1[C@@H](OC1)CBr                  | C00158846 | -12.66 | 0.14  | -12.74 | 2.32 | -2.39 |
| 4945 | Cc1cn(cn1)CC=C                    | C01672433 | -12.66 | -2.17 | -13.46 | 4.77 | -1.79 |
| 4946 | CCOC/C=C/C                        | C01765538 | -12.66 | -0.17 | -13.05 | 1.5  | -0.94 |

|      |                            |           |        |       |        |       |       |
|------|----------------------------|-----------|--------|-------|--------|-------|-------|
| 4947 | c1cnsc1                    | C01847600 | -12.66 | -1.09 | -13.37 | 3.27  | -1.46 |
| 4948 | Cn1c(=O)cc(s1)Cl           | C02002061 | -12.66 | -0.16 | -16.02 | 5.43  | -1.9  |
| 4949 | c1ccc2c(c1)oc(=S)o2        | C02518996 | -12.66 | 1.54  | -17.78 | 7.46  | -3.88 |
| 4950 | CCCC(=C)C(=O)Cl            | C02541519 | -12.66 | -1.33 | -12.6  | 2.83  | -1.56 |
| 4951 | CNc1cc(nc(n1)F)F           | C03129092 | -12.66 | -1.85 | -14.01 | 4.52  | -1.32 |
| 4952 | CC(=O)CC(=O)COC            | C04353401 | -12.66 | -2.92 | -15.18 | 7.01  | -1.57 |
| 4953 | CN1cncc1C=O                | C04384378 | -12.66 | -2.59 | -14.33 | 7.42  | -3.15 |
| 4954 | CC[C@H](c1ccccc1F)O        | C15442977 | -12.66 | -1.22 | -11.88 | 3.26  | -2.82 |
| 4955 | c1c(c(c[nH]c1=O)F)Br       | C15684419 | -12.66 | -0.24 | -16.51 | 3.34  | 0.75  |
| 4956 | CCC(=O)[C@H](C#N)Cl        | C21982974 | -12.66 | 0.23  | -13.99 | 3.96  | -2.86 |
| 4957 | C[C@H](c1cccc1)Cl          | C32005372 | -12.66 | -1.14 | -11.06 | 2.98  | -3.44 |
| 4958 | COc1ccc(cc1)O              | C00001684 | -12.65 | -2.51 | -13.06 | 3.57  | -0.65 |
| 4959 | COC(=O)CCc1ccccc1O         | C00153017 | -12.65 | -1.48 | -15.46 | 4.95  | -0.66 |
| 4960 | CCC(=O)n1cncc1             | C00901601 | -12.65 | -3.02 | -13.1  | 6.7   | -3.22 |
| 4961 | C(CCl)SC#N                 | C01734841 | -12.65 | 0.42  | -14.16 | 3.75  | -2.66 |
| 4962 | CCc1ccc(o1)C=O             | C02243037 | -12.65 | -1.41 | -15.3  | 7.41  | -3.36 |
| 4963 | c1c(cc(c1N=C=S)F)F         | C02506744 | -12.65 | -0.02 | -13.81 | 3.14  | -1.95 |
| 4964 | CC(C)OC(=O)CBr             | C02539275 | -12.65 | -1.65 | -11.46 | 3.88  | -3.43 |
| 4965 | CC(=O)NCCc1ccco1           | C03279385 | -12.65 | -0.09 | -17.48 | 6.26  | -1.34 |
| 4966 | C1=C(N=NC1=O)N             | C04582838 | -12.65 | -4.34 | -15.52 | 4.98  | 2.24  |
| 4967 | C1CC=C[C@H](C1)CC#N        | C04706407 | -12.65 | -0.91 | -14.54 | 4.8   | -2    |
| 4968 | CC(=NOC=C)C                | C05377858 | -12.65 | -0.15 | -13.94 | 3.69  | -2.26 |
| 4969 | CSC(=S)N                   | C06425141 | -12.65 | -1.52 | -13.32 | 1.1   | 1.1   |
| 4970 | Cc1ccc[nH]c1=O             | C08580061 | -12.65 | -1.57 | -16.28 | 4.76  | 0.44  |
| 4971 | C(C(=O)C(F)F)F             | C16158475 | -12.65 | -0.16 | -12.55 | 2.84  | -2.78 |
| 4972 | c1cc(ccc1C/C(=N/O)/N)F     | C16957726 | -12.65 | -2.59 | -16.62 | 7.81  | -1.25 |
| 4973 | c1cc(ccc1)CCC=O            | C19682806 | -12.65 | -0.82 | -16.19 | 7.31  | -2.95 |
| 4974 | CN(C)C=C/[N+](=O)[O-]      | C19735116 | -12.65 | -2.2  | -14.75 | 7.18  | -2.87 |
| 4975 | c1cc(c(c(c1O-))C#N)F       | C26522326 | -12.65 | 1.16  | -17.82 | 5.55  | -1.55 |
| 4976 | c1cc(ccc1N)NC(=S)N         | C00569446 | -12.64 | -2.12 | -19.49 | 9.96  | -0.98 |
| 4977 | c1cc(cc(c1)NC=O)N          | C01566598 | -12.64 | -1.39 | -18.19 | 7.41  | -0.47 |
| 4978 | CC(=O)C(C(F)F)(F)F         | C01675519 | -12.64 | -1.09 | -12.03 | 2.89  | -2.4  |
| 4979 | CC(=O)OCBr                 | C01846487 | -12.64 | -1.42 | -13.16 | 4.2   | -2.26 |
| 4980 | CSC(=O)c1ccco1             | C01850674 | -12.64 | -0.56 | -13.82 | 4.45  | -2.71 |
| 4981 | CC#C[C@H](C)O              | C02508066 | -12.64 | -2.58 | -12.03 | 2.81  | -0.84 |
| 4982 | CN1c(c(cn1)N=O)N           | C04285550 | -12.64 | -4.45 | -15.16 | 7.59  | -0.62 |
| 4983 | Cc1c(non1)/N=N/c2c(non2)C  | C04460104 | -12.64 | -0.64 | -13.03 | 3.93  | -2.91 |
| 4984 | c1c(c(cnc1Cl)F)Br          | C08698173 | -12.64 | 0.8   | -12.15 | 1.62  | -2.91 |
| 4985 | c1c(=O)nc([nH]n1)NN        | C16955996 | -12.64 | -5.06 | -16.48 | 6.55  | 2.35  |
| 4986 | c1cc(oc1)[C@H]2CO2         | C19730639 | -12.64 | -1.67 | -14.99 | 5.39  | -1.37 |
| 4987 | CCC(C(=O)OCC)(F)F          | C31176451 | -12.64 | -0.39 | -10.99 | 2.42  | -3.68 |
| 4988 | C=CCNC(=O)n1cncc1          | C32628636 | -12.64 | -2.83 | -14.37 | 7.57  | -3.02 |
| 4989 | c1cc(c(nc1)C(=O)N)O        | C00156997 | -12.63 | -7.07 | -14.25 | 7.39  | 1.3   |
| 4990 | c1ccn(c(=O)c1)CCC#N        | C01606328 | -12.63 | -2.34 | -19.7  | 11.44 | -2.03 |
| 4991 | CC(=O)C(=C)COCO            | C01636251 | -12.63 | -3.37 | -15.31 | 6.1   | -0.04 |
| 4992 | COC([C@H](F)Cl)F           | C02040626 | -12.63 | -1.45 | -11.75 | 2.21  | -1.63 |
| 4993 | c1cc(c(nc1)F)I             | C02384102 | -12.63 | -0.38 | -16.43 | 4.31  | -0.13 |
| 4994 | C=Cc1ccc(cc1)CO            | C02566080 | -12.63 | -1.07 | -15.52 | 3.52  | 0.44  |
| 4995 | CCNc1cccc(c1)F             | C19772292 | -12.63 | -2.84 | -9.16  | 2.6   | -3.24 |
| 4996 | c12c(n[nH]n1)C(=O)N=NC2=O  | C19798253 | -12.63 | -5.87 | -18.76 | 5.81  | 6.19  |
| 4997 | c1c(nc(s1)[O-])O           | C00967383 | -12.62 | -5.58 | -15.25 | 5.93  | 2.27  |
| 4998 | C1CC(=O)C=C1Cl             | C02004732 | -12.62 | -0.45 | -15.83 | 4.22  | -0.57 |
| 4999 | C/C=C/COC(=O)C             | C02168392 | -12.62 | 0.17  | -13.16 | 3.81  | -3.44 |
| 5000 | Cc1cc(=O)n([nH]1)C         | C03199631 | -12.62 | -3.83 | -13.85 | 4.86  | 0.21  |
| 5001 | Cc1c(c[nH]n1)C=O           | C04243451 | -12.62 | -2.58 | -15.17 | 6.14  | -1.01 |
| 5002 | Cc1cnccc1C#N               | C05420335 | -12.62 | -2.57 | -11.36 | 3.99  | -2.68 |
| 5003 | c1c(nc(s1)N)CSC(=[NH2+])N  | C08617634 | -12.62 | -2.08 | -14.22 | 3.79  | -1.62 |
| 5004 | c1nnnn1c2nnc(s2)S          | C11690073 | -12.62 | -4.34 | -12.45 | 5.18  | -1.02 |
| 5005 | c1cc(nc(c1Br)F)Cl          | C12359471 | -12.62 | -2.36 | -13.83 | 3.54  | 0.03  |
| 5006 | c1c(cc(c2c1[nH]nc2Cl)F)F   | C14983965 | -12.62 | -0.53 | -12.44 | 3.14  | -2.79 |
| 5007 | CCO/C(=C/C(=O)C(F)F)/N     | C15442533 | -12.62 | -3.52 | -12.63 | 4.3   | -0.77 |
| 5008 | c1cc(c(cc1C(F)F)F)O        | C16159595 | -12.62 | -6.03 | -9.64  | 3.66  | -0.3  |
| 5009 | c1(nnc(o1)N)C(F)F          | C16382873 | -12.62 | -4.99 | -15.1  | 4.53  | 2.94  |
| 5010 | Cn1c(cnn1)C=O              | C20443600 | -12.62 | -4.04 | -15.57 | 7.63  | -0.65 |
| 5011 | c1c(c([nH+](c1Cl)F)[O-])   | C21981948 | -12.62 | -6.15 | -12.36 | 6.14  | -0.24 |
| 5012 | CC[C@H](CC#C)O             | C21991298 | -12.62 | -0.39 | -13.24 | 3.02  | -2.02 |
| 5013 | CC1=CC(=NNC1)C             | C21992753 | -12.62 | -1.62 | -12.52 | 3.29  | -1.77 |
| 5014 | COc1cnc(cn1)Cl             | C33359456 | -12.62 | -1.52 | -13.83 | 2.74  | -0.02 |
| 5015 | c1csc1S(=O)(=O)N           | C00967207 | -12.61 | -1.07 | -19.65 | 6.85  | 1.25  |
| 5016 | Cn1c[nH]c1=S               | C01187543 | -12.61 | -1.48 | -13.79 | 4.95  | -2.29 |
| 5017 | C1C=CCC1CO                 | C01435886 | -12.61 | -1.37 | -12.47 | 2.13  | -0.91 |
| 5018 | c1c(=O)[nH](c(=O)[nH]c1F)  | C01607275 | -12.61 | -1.45 | -17.78 | 5.52  | 1.11  |
| 5019 | CCOCC(=C)Br                | C01639892 | -12.61 | -0.42 | -14.19 | 2.26  | -0.26 |
| 5020 | CC(=O)C=C/C                | C01693783 | -12.61 | -1.88 | -13.28 | 4.19  | -1.64 |
| 5021 | c1c(cc(cc1O)F)[N+](=O)[O-] | C01701564 | -12.61 | -2.87 | -12.49 | 4.56  | -1.81 |
| 5022 | Cn1cccc1C#N                | C02584072 | -12.61 | -1.53 | -12.35 | 4.49  | -3.23 |
| 5023 | c1ccc2c(c1)[C@H]2O         | C03107554 | -12.61 | -2.18 | -12.39 | 3.59  | -1.63 |
| 5024 | c1c(cc(c1F)C#N)F           | C12359184 | -12.61 | 1.02  | -14.44 | 3.67  | -2.85 |
| 5025 | c1cc(ccc1)F)OCCON          | C19727751 | -12.61 | -2.18 | -13.84 | 5.11  | -1.69 |
| 5026 | CCC(=O)Oc1cccnc1           | C22129873 | -12.61 | -0.93 | -13.9  | 5.86  | -3.63 |
| 5027 | CNc1ccc(cc1F)N             | C26515334 | -12.61 | -2    | -13.53 | 3.89  | -0.97 |
| 5028 | c1tsc1N)CO                 | C30678144 | -12.61 | -3.55 | -16.22 | 6.1   | 1.07  |
| 5029 | C(CBr)C(=O)N=C=O           | C32501080 | -12.61 | 1.61  | -17.45 | 2.95  | 0.27  |
| 5030 | c1c([nH]c(=O)[nH]c1=O)N)N  | C01666585 | -12.6  | -5.41 | -19.25 | 8.63  | 3.44  |
| 5031 | CC1=C(OCC1)C               | C01707813 | -12.6  | -0.47 | -13.41 | 2.11  | -0.83 |
| 5032 | C#Cc1ccc(s1)C#C            | C02541494 | -12.6  | -0.43 | -12.32 | 3.8   | -4.66 |
| 5033 | Cc1cc(ccc1N)SC#N           | C03164873 | -12.6  | -1.14 | -12.64 | 3.91  | -2.72 |
| 5034 | c1cc(ccc1[P@@H](=O)[O-])Cl | C03165596 | -12.6  | -4.47 | -14.32 | 7.73  | -1.53 |
| 5035 | C(OCC)Cl                   | C04202480 | -12.6  | -1.4  | -11.81 | 1.86  | -1.25 |
| 5036 | CCNC(=O)c1cnccn1           | C05472106 | -12.6  | 0.71  | -19.25 | 6.2   | -0.26 |

|      |                                   |           |        |       |        |       |       |
|------|-----------------------------------|-----------|--------|-------|--------|-------|-------|
| 5037 | c1ccc(cc1)OCC(=S)N                | C05647051 | -12.6  | -3.07 | -14.19 | 3.88  | 0.78  |
| 5038 | c1(c(non1)[N+](=O)[O-])c2[nH]nnn2 | C06452771 | -12.6  | -5.71 | -10.21 | 4.66  | -1.34 |
| 5039 | C=C[S@](=O)c1cccc1                | C08294950 | -12.6  | -3.64 | -15.06 | 8.99  | -2.9  |
| 5040 | c1c(nc(s1)N)C#N                   | C12320990 | -12.6  | -0.64 | -16.87 | 5.94  | -1.03 |
| 5041 | Cc1c2c(nc[nH]2)ncn1               | C14593164 | -12.6  | -1.76 | -15.11 | 7.28  | -3    |
| 5042 | c1cscc1[C@@H](C#N)N               | C21950033 | -12.6  | 0.22  | -16.54 | 4.8   | -1.08 |
| 5043 | CCc1[n-]c2cnc2n1                  | C26439583 | -12.6  | -4.76 | -13.12 | 7.58  | -2.3  |
| 5044 | [H]/N=C\1/C=C(C(S1)C)C            | C31861601 | -12.6  | -0.97 | -13.21 | 3.6   | -2.02 |
| 5045 | Cc1c(ccc1N)N                      | C00388289 | -12.59 | -2.71 | -11.73 | 2.73  | -0.88 |
| 5046 | c1cnc2c1csc2                      | C00966806 | -12.59 | -1.62 | -14.88 | 3.68  | 0.23  |
| 5047 | c1c(c(=O)[nH]c(=O)[nH]1)Br        | C00967318 | -12.59 | -4.87 | -16.89 | 8.82  | 0.34  |
| 5048 | C1CCC(=O)C1                       | C00967469 | -12.59 | -1.19 | -13.73 | 3.35  | -1.01 |
| 5049 | Cn1cc(n1)CCl                      | C01610364 | -12.59 | -1    | -14.2  | 5.13  | -2.52 |
| 5050 | c1cnc(c(n1)C(=O)N)N               | C01719389 | -12.59 | -3.14 | -18.67 | 5.61  | 3.61  |
| 5051 | CCn1cc(cn1)N                      | C02554028 | -12.59 | -0.48 | -15.29 | 4.08  | -0.91 |
| 5052 | c1c(c(c(nn1)NN)N)Cl               | C08616364 | -12.59 | -5.08 | -14.12 | 5.77  | 0.82  |
| 5053 | c1cc2c(cc1O)[nH]cn2               | C18543204 | -12.59 | -4.08 | -14.51 | 7.04  | -1.04 |
| 5054 | CCc1ccc(s1)[N+](=O)[O-]           | C32602823 | -12.59 | -2.18 | -11.25 | 5.3   | -4.46 |
| 5055 | CC(C)I                            | M1995A003 | -12.59 | 0.49  | -10.81 | 0.69  | -2.96 |
| 5056 | c1c(c(c(c1F)F)Br)N)F              | C00056691 | -12.58 | -3.06 | -10.96 | 1.99  | -0.54 |
| 5057 | c1c(cc(c1F)N)F)Br                 | C00159313 | -12.58 | -0.52 | -13.51 | 1.33  | 0.12  |
| 5058 | c1c(cncn1)C(=O)N                  | C00334399 | -12.58 | -2.88 | -18.35 | 6.7   | 1.94  |
| 5059 | c1cnc(c1)NC=O                     | C00388697 | -12.58 | -1.98 | -18.51 | 9.77  | -1.86 |
| 5060 | COCC(=O)Cc1ccccn1                 | C00404445 | -12.58 | 0.05  | -16.68 | 7.4   | -3.34 |
| 5061 | C(C(=O)C(F)F)Cl                   | C02382176 | -12.58 | -0.11 | -13.93 | 3.66  | -2.2  |
| 5062 | c1cnc(c1)CC=O                     | C02537468 | -12.58 | -1.23 | -17.32 | 7.48  | -1.51 |
| 5063 | C/C=C/CC(=O)OC                    | C02556897 | -12.58 | 0.1   | -14.37 | 3.83  | -2.14 |
| 5064 | CC(=O)CC=O                        | C05114132 | -12.58 | -5.04 | -13.25 | 5.64  | 0.07  |
| 5065 | c1cncsc1C=O                       | C06119181 | -12.58 | -1.65 | -16.25 | 6.59  | -1.27 |
| 5066 | Cc1nc2n(n1)C(=O)C(=N2)[O-]        | C06816747 | -12.58 | -1.07 | -18.65 | 6.39  | 0.75  |
| 5067 | c1c(nc[nH]1)N                     | C12958660 | -12.58 | -3.04 | -14.08 | 5.33  | -0.8  |
| 5068 | c1cc(c2ccccc2c1)O                 | C14982888 | -12.58 | -1.86 | -14.49 | 5.23  | -1.47 |
| 5069 | c1ccc(cc1)CNC(=S)NO               | C15783302 | -12.58 | -0.32 | -22.45 | 12.13 | -1.93 |
| 5070 | C1NNC(=N)N)1)N                    | C16778243 | -12.58 | -3.34 | -13.37 | 4.38  | -0.26 |
| 5071 | c1c(c(c(cn1)Cl)N)Cl               | C19419098 | -12.58 | 0.26  | -13.74 | 2.28  | -1.38 |
| 5072 | Cc1cnc(c(c1F)O)N                  | C21981848 | -12.58 | -1.59 | -16.21 | 4.82  | 0.41  |
| 5073 | CC(=O)OCOC(=O)C                   | C00409289 | -12.57 | -0.38 | -16.14 | 6.74  | -2.79 |
| 5074 | c1cc(cc(c1)N)C=O                  | C01655484 | -12.57 | -3.77 | -12.51 | 5.28  | -1.57 |
| 5075 | CCCOC(=O)C=C                      | C01665004 | -12.57 | 0.65  | -13.82 | 4     | -3.41 |
| 5076 | c1cc(c(c(c1F)NN)F)F               | C01678677 | -12.57 | -1.37 | -16.64 | 3.67  | 1.78  |
| 5077 | COCC1CCSC1                        | C02166996 | -12.57 | -1.08 | -11.86 | 2.1   | -1.73 |
| 5078 | Cc1ccnc(c1)N)F                    | C02526738 | -12.57 | -3.8  | -12.91 | 5     | -0.86 |
| 5079 | Cc1cc(cc(c1)F)O                   | C02527808 | -12.57 | -1.71 | -12.06 | 3.03  | -1.83 |
| 5080 | c1cc2c(cc1F)C(OC2(F)F)(F)F        | C02540395 | -12.57 | -3.01 | -9.8   | 3.47  | -3.23 |
| 5081 | CC(C=C)C(=O)Cl                    | C02574130 | -12.57 | 0.13  | -14.01 | 2.67  | -1.36 |
| 5082 | c1cc(c(cc1CCO)F)F                 | C04255270 | -12.57 | -2.3  | -12.22 | 4.05  | -2.09 |
| 5083 | C(#N)C(=NO)C#N                    | C05500529 | -12.57 | -4.44 | -12.31 | 3.72  | 0.47  |
| 5084 | c1cnc(nc1)C=O                     | C15022141 | -12.57 | -3.22 | -15.33 | 7.27  | -1.29 |
| 5085 | c1c(cnc(n1)N)CO                   | C26894820 | -12.57 | -2.54 | -18    | 7.28  | 0.69  |
| 5086 | c1ccc(cc1)CC(=O)NN                | C00080757 | -12.56 | -5.81 | -13.26 | 7.91  | -1.4  |
| 5087 | Cc1cccc(c1)OC(=O)NC               | C00135179 | -12.56 | -0.86 | -15.78 | 6.55  | -2.47 |
| 5088 | Cc1c(c(c(c1F)N)F)F                | C00155915 | -12.56 | -0.74 | -11.64 | 1.93  | -2.11 |
| 5089 | c1cc(c(c(c1)F)O)O                 | C00164683 | -12.56 | -2.09 | -16.22 | 5.49  | 0.25  |
| 5090 | COCC(=O)n1cccc1                   | C00396077 | -12.56 | -1.28 | -12.69 | 4.27  | -2.86 |
| 5091 | CCSCC                             | C01529401 | -12.56 | -0.55 | -10.15 | 1.23  | -3.08 |
| 5092 | Cc1csc(n1)NN                      | C01588808 | -12.56 | -3.72 | -12.51 | 4.36  | -0.69 |
| 5093 | C=C(C#N)Cl                        | C01603500 | -12.56 | -2.41 | -12.11 | 4.08  | -2.12 |
| 5094 | C1CC(C1)C(=O)Cl                   | C01609476 | -12.56 | 0.93  | -13    | 2.47  | -2.97 |
| 5095 | C/(C=C/Br)NC(=O)C(F)F             | C01673955 | -12.56 | -0.96 | -14.58 | 3.55  | -0.57 |
| 5096 | CCC(=O)OCC=C                      | C01683670 | -12.56 | -0.19 | -12.48 | 3.52  | -3.41 |
| 5097 | c1ccc(cc1)OC#N                    | C02004401 | -12.56 | -0.63 | -13.91 | 2.52  | -0.54 |
| 5098 | C(#CC#N)C#N                       | C02039983 | -12.56 | -1.33 | -11.79 | 2.79  | -2.23 |
| 5099 | c1cc(sc1)CC(=O)Cl                 | C02141010 | -12.56 | -2.51 | -13.61 | 4     | -0.45 |
| 5100 | c1cnc(cn1)CO                      | C02383124 | -12.56 | -0.88 | -18.01 | 5.02  | 1.31  |
| 5101 | c1c[nH]c2c1c(cc2F)F               | C02572575 | -12.56 | -2.61 | -10.04 | 3.59  | -3.5  |
| 5102 | C1[C@H](C)C=C1)C=O                | C03875686 | -12.56 | -0.96 | -12    | 3.61  | -3.2  |
| 5103 | c1c[nH]nc1N                       | C04674340 | -12.56 | -3.75 | -13.76 | 4.89  | 0.06  |
| 5104 | CC(=O)NCc1ccncc1                  | C11535644 | -12.56 | -0.91 | -17.03 | 6.69  | -1.32 |
| 5105 | C1CSc2n1c(nn2)N                   | C11919854 | -12.56 | -2.68 | -17.76 | 10.81 | -2.93 |
| 5106 | c1ccc2c(c1)[nH]c(=O)[nH]2         | C18115182 | -12.56 | -2.19 | -15.37 | 6.19  | -1.19 |
| 5107 | c1ccc(cc1)NC(=O)NO                | C00161805 | -12.55 | -3.76 | -18.63 | 10.41 | -0.57 |
| 5108 | Cc1c[nH]c(S)nn1[S-]               | C01239139 | -12.55 | -2.75 | -13.89 | 6.24  | -2.15 |
| 5109 | CCOC(=C(C(F)F)C(F)F)F             | C01826977 | -12.55 | -0.96 | -9.01  | 2.19  | -4.77 |
| 5110 | c1cc(cc(c1)O)CCl                  | C02034015 | -12.55 | -1.42 | -15.23 | 3.5   | 0.6   |
| 5111 | C[C@H]1CCCS1                      | C02039244 | -12.55 | 0.18  | -11.3  | 1.97  | -3.39 |
| 5112 | COCC1c(ccc1O)O                    | C02146972 | -12.55 | -1.28 | -17.5  | 5.95  | 0.28  |
| 5113 | CCOnc1cc(cn1)N                    | C02537624 | -12.55 | -2.22 | -15.32 | 4.17  | 0.82  |
| 5114 | C/C=C(C)/C=N/O                    | C04783426 | -12.55 | -1.16 | -14.63 | 3.47  | -0.24 |
| 5115 | CCCOC(=O)CCS                      | C04802679 | -12.55 | 1.2   | -12.81 | 2.74  | -3.68 |
| 5116 | c1[nH]c2c(n1)c(cnc2)Cl            | C04807217 | -12.55 | -4.38 | -13.05 | 7.72  | -2.84 |
| 5117 | Cc1ccc(=O)[nH]n1                  | C08603112 | -12.55 | -1.95 | -17.25 | 7.09  | -0.43 |
| 5118 | c1cc(c(cc1CO)N)F                  | C12336788 | -12.55 | -2.78 | -14.1  | 4.07  | 0.26  |
| 5119 | C=C1CC(C1)C(=O)Cl                 | C16124713 | -12.55 | -0.5  | -11.74 | 2.92  | -3.23 |
| 5120 | c1cc(c(c(c1N)N)F)Br               | C16125748 | -12.55 | -1.08 | -14.26 | 3.68  | -0.88 |
| 5121 | c1cc(c(cc1Br)O)N                  | C20357555 | -12.55 | -1.92 | -15.2  | 4.7   | -0.13 |
| 5122 | c1cc2c(c1)c(=O)[nH]2              | C00150793 | -12.54 | -1.89 | -13.36 | 5.23  | -2.52 |
| 5123 | CCOC(=C)OCC                       | C00391146 | -12.54 | -0.68 | -12.45 | 2.25  | -1.66 |
| 5124 | C[C@H]1C[C@@H](C=C1)OC(=O)C       | C01095300 | -12.54 | 0.13  | -15.22 | 4.43  | -1.88 |
| 5125 | CCOC(F)F)F                        | C01845822 | -12.54 | -0.81 | -11.76 | 1.18  | -1.14 |
| 5126 | Cc1ccc(cc1N)C#N                   | C02526462 | -12.54 | -1.47 | -12.58 | 4.07  | -2.57 |



|      |                              |           |        |       |        |       |       |
|------|------------------------------|-----------|--------|-------|--------|-------|-------|
| 5127 | c1cc(sc1)[P@H](=O)O          | C06513153 | -12.54 | -3.43 | -17.03 | 7.6   | 0.32  |
| 5128 | C[C@H]1CON=C1[N+](=O)[O-]    | C15784737 | -12.54 | 1.44  | -16    | 4.63  | -2.61 |
| 5129 | c1cncc(c1C(F)F)F             | C16159519 | -12.54 | -1.98 | -10.23 | 2.74  | -3.06 |
| 5130 | CC(=O)Nn1c(nnn1)N            | C16955107 | -12.54 | -4.43 | -15.54 | 7.82  | -0.39 |
| 5131 | c1cc(nnc1)C#N                | C26460099 | -12.54 | -3.28 | -15.06 | 7.42  | -1.62 |
| 5132 | c1c[nH]nc1CC#N               | C26898483 | -12.54 | -2.15 | -17.63 | 8.79  | -1.55 |
| 5133 | CC[C@H](c1ccncc1)O           | C32914835 | -12.54 | -1.73 | -13.5  | 3.97  | -1.28 |
| 5134 | c1cc(c(nc1))F                | C01443090 | -12.53 | 0.43  | -16.93 | 4.07  | -0.1  |
| 5135 | c12c(nc(nc1n[nH]n2)N)N       | C01666567 | -12.53 | -5.41 | -15.62 | 7.87  | 0.63  |
| 5136 | CN[P@H]Cc1cccc1              | C01691054 | -12.53 | -1.75 | -9.48  | 1.71  | -3.01 |
| 5137 | CCOc1ccc(cc1)Cl              | C01693308 | -12.53 | 0.75  | -14.52 | 2.05  | -0.8  |
| 5138 | CCN=C=S                      | C01736702 | -12.53 | -0.08 | -12.43 | 1.43  | -1.45 |
| 5139 | COC(=O)[C@H](C(F)F)F         | C01847473 | -12.53 | -0.39 | -13.9  | 4.37  | -2.61 |
| 5140 | c1cnc(cc1Cl)Cl               | C02012914 | -12.53 | -1.96 | -10.47 | 2.54  | -2.65 |
| 5141 | c1csc(c1)/C=C/C(=O)Cl        | C02513848 | -12.53 | 1.01  | -13.36 | 3.68  | -3.86 |
| 5142 | Cc1cnc(c1)O                  | C02537613 | -12.53 | -2.57 | -15.49 | 5.11  | 0.43  |
| 5143 | c1cc(cc1C=O)SC(F)F           | C02643974 | -12.53 | -0.31 | -15.76 | 5.5   | -1.96 |
| 5144 | c1cnccc1c2ccn[nH]2           | C09238267 | -12.53 | -1.22 | -14.6  | 5.13  | -1.83 |
| 5145 | c1c(cnc(=O)[nH]1)l           | C12958973 | -12.53 | -1.39 | -16.6  | 3.81  | 1.64  |
| 5146 | CC(1=NNC(=O)/C1=N)O          | C17058625 | -12.53 | -4.42 | -16.57 | 6.2   | 2.26  |
| 5147 | Cc1cc2cccc2o1                | M1995A039 | -12.53 | -1.21 | -11.19 | 4.15  | -4.28 |
| 5148 | c1cc(c(cc1F)Nc2nccn(n2)N)F   | C00089563 | -12.52 | -0.58 | -10.73 | 5.15  | -6.35 |
| 5149 | c1cc(c(cc1C#N)Cl)F           | C00152696 | -12.52 | -1.68 | -12.31 | 3.87  | -2.41 |
| 5150 | Cc1c(c(on1)N)C#N             | C00168736 | -12.52 | -4.39 | -13.01 | 4.75  | 0.12  |
| 5151 | c1ccc(cc1)/C=C/NC=O          | C01611408 | -12.52 | -2.8  | -16.54 | 7.43  | -0.6  |
| 5152 | CC(=C(=O)Cl)C                | C02140825 | -12.52 | 0.01  | -13.91 | 2.63  | -1.26 |
| 5153 | c1cc(oc1)/C=C/C=O            | C06096965 | -12.52 | -0.06 | -16.26 | 6.54  | -2.73 |
| 5154 | c1(c(c(c(c1F)F)F)F)O)N       | C10157948 | -12.52 | -4.99 | -11.83 | 4.11  | 0.19  |
| 5155 | c1ccc(c1C=O)Br               | C12370772 | -12.52 | -1.86 | -14.05 | 5.63  | -2.25 |
| 5156 | CC(=O)c1cnc([nH]1)Br         | C12647614 | -12.52 | -2.22 | -13.74 | 5.45  | -2.01 |
| 5157 | c1ccc(c1)N)SCC#N             | C19431015 | -12.52 | -0.9  | -14.38 | 5.9   | -3.15 |
| 5158 | c1nc(c(n1C#N)Cl)Cl           | C00160929 | -12.51 | -4.07 | -14.57 | 10.17 | -4.05 |
| 5159 | CSct1nccn1                   | C00967360 | -12.51 | -3.27 | -13.63 | 5.95  | -1.57 |
| 5160 | c1c(=O)[nH]c(=O)n(n1)CCC#N   | C01584613 | -12.51 | -1.49 | -19.75 | 8.76  | -0.04 |
| 5161 | CCCCOC(=O)Cl                 | C01586311 | -12.51 | -0.98 | -11.59 | 1.72  | -1.66 |
| 5162 | c1cc2c([nH]nc2O)nc1          | C01715820 | -12.51 | -4.35 | -17.32 | 7.99  | 1.18  |
| 5163 | CCCCSC(=O)C                  | C01736013 | -12.51 | -0.68 | -13.43 | 2.51  | -0.91 |
| 5164 | c1cc(c(cc1C=O)F)O            | C02566026 | -12.51 | -3.47 | -13.66 | 5.63  | -1.02 |
| 5165 | C(CS)CCl                     | C04501375 | -12.51 | 0     | -11.53 | 1.86  | -2.84 |
| 5166 | c1cc(sc1)/C=C/CO             | C05181090 | -12.51 | -1.12 | -15.68 | 3.04  | 1.25  |
| 5167 | c1c(c(c(S)[nH]1)l)S-])N      | C08616365 | -12.51 | -4.02 | -14.23 | 5.45  | 0.29  |
| 5168 | c1cc(sc1CO)Br                | C08727737 | -12.51 | -2.72 | -12.14 | 3.39  | -1.03 |
| 5169 | c1c2c(cc(c1F)F)nc[nH]2       | C11535703 | -12.51 | -3.59 | -12.54 | 6.81  | -3.19 |
| 5170 | c1cc(c(cc1F)N)C(F)F          | C12359261 | -12.51 | -3.23 | -9.56  | 1.94  | -1.66 |
| 5171 | C1C[C@H](COC1)CCl            | C14987965 | -12.51 | -0.67 | -11.13 | 1.94  | -2.65 |
| 5172 | C1COC(=CO1)C(=O)Cl           | C31772028 | -12.51 | 2.1   | -18.43 | 5.76  | -1.94 |
| 5173 | c1cc(oc1)/C=C/[N+](=O)[O-]   | C00055261 | -12.5  | -0.02 | -14.36 | 5.51  | -3.63 |
| 5174 | c1cc([nH]c1)C(=O)N           | C00331859 | -12.5  | -3.64 | -17.4  | 7.91  | 0.63  |
| 5175 | CNc1cccc(c1)N                | C00395228 | -12.5  | -0.47 | -16.59 | 2.72  | 1.84  |
| 5176 | CC(=O)OC1=CCCC1              | C00397582 | -12.5  | -0.28 | -14.76 | 4.52  | -1.99 |
| 5177 | c1c(ocnc1(O))C(=O)N          | C01601705 | -12.5  | -4.98 | -17.8  | 8.26  | 2.02  |
| 5178 | C(C=C(Cl)Cl)O                | C01634330 | -12.5  | -2.09 | -13.76 | 2.06  | 1.28  |
| 5179 | CC(=C)C(=O)OCC(F)F           | C01665001 | -12.5  | -1.33 | -10.98 | 3.49  | -3.67 |
| 5180 | Cc1c[nH]cc1C#N               | C05378563 | -12.5  | -4.91 | -12.51 | 6.5   | -1.58 |
| 5181 | CCOC(=O)/C=N/O               | C14455584 | -12.5  | -4.82 | -13.86 | 6.14  | 0.05  |
| 5182 | CCNc1cc(ncn1)Cl              | C15021259 | -12.5  | -0.52 | -12.46 | 3.3   | -2.82 |
| 5183 | C[C@H](C(=O)Cl)N             | C20216998 | -12.5  | -2.04 | -12.8  | 2.14  | 0.19  |
| 5184 | c1nc(sn1)C=O                 | C20443625 | -12.5  | -2.95 | -16.61 | 7.66  | -0.59 |
| 5185 | C1C(=O)SCC(=O)S1             | C01558011 | -12.49 | 1.18  | -16.65 | 4.62  | -1.64 |
| 5186 | CC(=O)c1cccn1C               | C01561741 | -12.49 | 1.47  | -15.63 | 4.97  | -3.3  |
| 5187 | CC(=C)[C@H](CC=C)O           | C02169054 | -12.49 | -0.87 | -12.93 | 1.6   | -0.29 |
| 5188 | C/C=C/C(=O)OCC(F)F           | C02525291 | -12.49 | -1.6  | -10.48 | 3.41  | -3.82 |
| 5189 | c1c[nH]c(=O)cc1Cl            | C02598079 | -12.49 | -4.44 | -14.72 | 8.13  | -1.46 |
| 5190 | CC(C)CCON=O                  | C03830220 | -12.49 | -0.05 | -11.03 | 1.82  | -3.24 |
| 5191 | Cc1c([nH]cn1)l               | C04352766 | -12.49 | -3.3  | -12.13 | 5.7   | -2.76 |
| 5192 | C/C=C/C(=O)O                 | C05082921 | -12.49 | 0.06  | -12.19 | 3.39  | -0.76 |
| 5193 | CCCCN=[N+]=[N-]              | C05352785 | -12.49 | -0.32 | -12.89 | 1.19  | -3.46 |
| 5194 | CC/C=C/CO                    | C06661425 | -12.49 | -2.19 | -11.72 | 2.14  | -0.72 |
| 5195 | C(=O)([C@H](C(F)F)(F)Cl)Br   | C16159138 | -12.49 | -0.25 | -10.15 | 0.65  | -2.74 |
| 5196 | c1cc(cc(c1)OC(F)F)Cl)N       | C16159191 | -12.49 | -1.66 | -11.28 | 2.52  | -2.07 |
| 5197 | C(C(F)F)OC([C@H](F)Cl)(F)F   | C16159415 | -12.49 | -1.5  | -11.05 | 2.87  | -2.8  |
| 5198 | CC(=O)C=CC(=O)C              | C17146014 | -12.49 | -2.01 | -15.09 | 8.18  | -3.57 |
| 5199 | C1C(=O)N/C(=C/C#N)/S1        | C18217617 | -12.49 | -2.4  | -16.98 | 8.15  | -1.26 |
| 5200 | COC(=O)Nc1cccc(c1)N          | C19815594 | -12.49 | 0.16  | -19.39 | 7.22  | -0.48 |
| 5201 | CCC(=O)[C@H](C)Br            | C19843047 | -12.49 | 0.53  | -12.27 | 2.42  | -3.17 |
| 5202 | c1ccc2c1C(=O)CC2             | C20216470 | -12.49 | -0.69 | -16.79 | 7.73  | -2.74 |
| 5203 | c1c(snn1)C=O                 | C20443605 | -12.49 | -2.48 | -16.55 | 7.18  | -0.63 |
| 5204 | C/C=C/OC(=O)CCl              | C21986546 | -12.49 | 1.54  | -15.09 | 4.63  | -3.57 |
| 5205 | C[C@H](C(=O)n1ccnc1)Cl       | C28166230 | -12.49 | -0.27 | -13.84 | 4.66  | -3.04 |
| 5206 | c1ccc(cc1)[C@H](CS)O         | C32625175 | -12.49 | -0.91 | -11.99 | 2.78  | -2.37 |
| 5207 | CC(=O)c1ccc(s1)Cl            | C00035873 | -12.48 | -0.41 | -14.69 | 3.1   | -0.48 |
| 5208 | Cc1ccc(=O)[nH]c1=O           | C00399538 | -12.48 | -2.65 | -18.38 | 9.58  | -1.02 |
| 5209 | CSct1c(ncn1)N                | C01559181 | -12.48 | -1.7  | -13.02 | 3.68  | -1.43 |
| 5210 | C[C@H](C(=O)OCC(=C)Cl)O      | C01641211 | -12.48 | -0.77 | -14.29 | 4.41  | -1.83 |
| 5211 | CCOC(=O)[C@H](C)[N+](=O)[O-] | C01691713 | -12.48 | -1.16 | -14.13 | 6.29  | -3.49 |
| 5212 | C[C@H](C#N)OC(=O)C           | C02045170 | -12.48 | -1.76 | -12.88 | 4.88  | -2.72 |
| 5213 | COC(C(F)F)F                  | C02242932 | -12.48 | -1.4  | -10.86 | 1.19  | -1.41 |
| 5214 | c1cc(c(c1F)O)Cl)F            | C02382102 | -12.48 | -0.97 | -14.72 | 3.66  | -0.44 |
| 5215 | Cc1ccc(cc1F)CC#N             | C02382216 | -12.48 | -2.37 | -14.05 | 6.87  | -2.93 |
| 5216 | c1ccc(c(nc1)F)O              | C02526745 | -12.48 | -1.61 | -16.81 | 5.81  | 0.12  |

|      |                                  |           |        |       |        |      |       |
|------|----------------------------------|-----------|--------|-------|--------|------|-------|
| 5217 | CN(CCC)N=O                       | C04403988 | -12.48 | -0.07 | -14.63 | 3.44 | -1.21 |
| 5218 | CC(=O)OC(=C)C#N                  | C04521097 | -12.48 | -1.29 | -15.89 | 8.02 | -3.31 |
| 5219 | C[C@H]1C(=O)CCS1                 | C05227203 | -12.48 | -0.89 | -12.02 | 3.12 | -2.69 |
| 5220 | Cc1cc(n1)N(+)=O][O-]             | C12395839 | -12.48 | -0.96 | -14.85 | 6.4  | -3.07 |
| 5221 | Cc1cc(ncc1F)N                    | C19615667 | -12.48 | -3.87 | -11.39 | 4.39 | -1.61 |
| 5222 | c1c(cnc(n1)N)O                   | C21298001 | -12.48 | -5.15 | -15.14 | 7.23 | 0.57  |
| 5223 | Cc1c(cc(n1)Br)Cl                 | C21993119 | -12.48 | -0.54 | -10.03 | 1.42 | -3.33 |
| 5224 | C[C@H]1C[C@H]1C(=O)N=C=S         | C22141578 | -12.48 | -0.27 | -13.29 | 3.73 | -2.64 |
| 5225 | Cc1[nH]cc(n1)C(F)(F)F            | C31176470 | -12.48 | 0.78  | -15.73 | 4.78 | -2.3  |
| 5226 | c1cc(c2c(c1)[nH]cn2)N            | C00112552 | -12.47 | -3.73 | -13.08 | 5.99 | -1.65 |
| 5227 | c1c(c(n[nH]1)C(=O)N)N            | C01072662 | -12.47 | -3.51 | -19.27 | 6.18 | 4.12  |
| 5228 | CC(C)COC(=O)C=C                  | C01577264 | -12.47 | 0.3   | -12.65 | 3.74 | -3.86 |
| 5229 | COC(=O)C=C/CBr                   | C01708353 | -12.47 | -1.2  | -12.64 | 4.55 | -3.18 |
| 5230 | C(CO)C#Cl                        | C03164239 | -12.47 | -3.08 | -12.95 | 2.34 | 1.22  |
| 5231 | c1cc(ncc1C(=O)Cl)F               | C04208891 | -12.47 | -1.04 | -13.02 | 3.8  | -2.21 |
| 5232 | c1c(cc1[N+](=O)[O-])[N+](=O)[O-] | C04404088 | -12.47 | -2.22 | -13.2  | 6.68 | -3.73 |
| 5233 | c1c(nc[nH]1)F                    | C04771528 | -12.47 | -3.45 | -12.43 | 4.98 | -1.56 |
| 5234 | C[C@H]1CC[C@H](O)1C              | C05225617 | -12.47 | 0.03  | -11.56 | 1.55 | -2.5  |
| 5235 | CCCc1ccc(n1)O                    | C05311252 | -12.47 | -1.71 | -12.88 | 3.73 | -1.61 |
| 5236 | CC(=O)Cc1ccncc1                  | C08294938 | -12.47 | -1.8  | -14.5  | 6.79 | -2.97 |
| 5237 | c1cc2c(c1)[nH]ncc2c1             | C08584258 | -12.47 | -3.88 | -15.73 | 9.47 | -2.33 |
| 5238 | CO/C=C/OC                        | C13410577 | -12.47 | -1.18 | -13.09 | 2.46 | -0.65 |
| 5239 | CC(C(=O)NCCO)(F)F                | C14628935 | -12.47 | -3.61 | -14.99 | 4.8  | 1.32  |
| 5240 | C[C@H](N+)(=O)[O-]Br             | C16968743 | -12.47 | -0.87 | -12.12 | 2.88 | -2.36 |
| 5241 | C1=NC(=O)N=C2C1=NN=N2            | C17173524 | -12.47 | -5.78 | -18.79 | 8.05 | 4.04  |
| 5242 | C1CC=C(C(=O)C)1O                 | C18056386 | -12.47 | -1.9  | -15.27 | 5.94 | -1.24 |
| 5243 | c1cc(n[nH]c1=O)[O-]              | C18181713 | -12.47 | -4.26 | -15.94 | 6.49 | 1.23  |
| 5244 | c1cnc(c(c1N)[N+](=O)[O-])N       | C19802592 | -12.47 | -1.39 | -16.96 | 6.08 | -0.2  |
| 5245 | Cc1ccc(cc1)NC(=S)C(=O)N          | C20367814 | -12.47 | -5.61 | -12.3  | 6.8  | -1.36 |
| 5246 | c1cc(c(c1)F)NCC#N)F              | C20476380 | -12.47 | -1.56 | -12.74 | 4.77 | -2.93 |
| 5247 | C(CO)/C=C/CO                     | C22060201 | -12.47 | -3.33 | -15.72 | 5.23 | 1.35  |
| 5248 | CC1=CN[C@H](C=C1)O               | C22060901 | -12.47 | -1.28 | -16.85 | 4.79 | 0.87  |
| 5249 | C[C@H](c1ccc(cc1)N)O             | C00404059 | -12.46 | -2.18 | -12.81 | 3.03 | -0.5  |
| 5250 | Cc1cccc1CO                       | C00896724 | -12.46 | -1.33 | -12.63 | 3.38 | -1.88 |
| 5251 | c1cc(ccc1OC(=N)N2+))N)Cl         | C01670681 | -12.46 | 0.04  | -19.04 | 3.34 | 3.2   |
| 5252 | c1(c(c(nc(c1)F)F)F)F)F)N         | C02579295 | -12.46 | -1.59 | -13.38 | 2.72 | -0.22 |
| 5253 | Cc1ccc2c(c1)CC2=O                | C03847808 | -12.46 | -1.94 | -10.98 | 4.64 | -4.18 |
| 5254 | c1ccc(cc1)OC(=S)Cl               | C03861662 | -12.46 | 0.68  | -15.58 | 2.44 | 0     |
| 5255 | c1ccc(cc1)NC(=S)N                | C03875720 | -12.46 | -2.66 | -15.49 | 4.22 | 1.47  |
| 5256 | c1cc(ncc1Br)C(F)(F)F             | C04244987 | -12.46 | -1.03 | -12.81 | 2.79 | -1.4  |
| 5257 | c1(c(nc(nc1N)N)N)[N+](=O)[O-]    | C04852051 | -12.46 | -2.35 | -14.36 | 4.63 | -0.38 |
| 5258 | c1ccc2c(c1)nc(s2)N               | C12341454 | -12.46 | -1.17 | -14.48 | 5.59 | -2.4  |
| 5259 | CCC/C=C/ICO                      | C12358736 | -12.46 | -1.21 | -12.23 | 2.11 | -1.14 |
| 5260 | COc1ccc(n1)N=O                   | C13213121 | -12.46 | -2.05 | -16.27 | 5.34 | 0.53  |
| 5261 | Cc1c[nH]c2c1cccn2                | C14984918 | -12.46 | -3.62 | -10.86 | 5.3  | -3.28 |
| 5262 | C(=N/O)C(=O)C=N/O                | C16980630 | -12.46 | -7.25 | -16.85 | 9.72 | 1.91  |
| 5263 | c1cc(c(cc1C#N)F)C1[NH3+]         | C19502678 | -12.46 | -0.87 | -14.88 | 5.1  | -1.81 |
| 5264 | c1cc(cc(c1)O)CN=C=O              | C19730729 | -12.46 | -1.51 | -17.17 | 5.69 | 0.52  |
| 5265 | CN(c1cc[nH+]cc1)N                | C19735433 | -12.46 | 1.08  | -16.31 | 3.96 | -1.19 |
| 5266 | c1ccc(cc1)CNCC(F)(F)F            | C19807542 | -12.46 | -0.83 | -11.25 | 2.99 | -3.37 |
| 5267 | c1ccc(c(c1)CC(=O)N)F             | C33029051 | -12.46 | -2.17 | -17.69 | 8.77 | -1.37 |
| 5268 | CCc1ccccc1C                      | M1995A041 | -12.46 | -0.67 | -8.38  | 1.42 | -4.82 |
| 5269 | c1ccc(cc1)NC(=O)C(F)(F)F         | C00170161 | -12.45 | -2.89 | -12.12 | 4.22 | -1.66 |
| 5270 | c1cc(c(cc1)F)C(F)(F)F)N          | C01706171 | -12.45 | -1.81 | -11.87 | 2.81 | -1.57 |
| 5271 | CC(=C)CCO                        | C01712065 | -12.45 | -1.8  | -11.97 | 1.88 | -0.56 |
| 5272 | Cc1nc(nc1)CCl                    | C01731419 | -12.45 | -0.59 | -15.68 | 4.72 | -0.9  |
| 5273 | COCCOC(=C(F)F)F                  | C02530850 | -12.45 | -0.82 | -10.14 | 1.45 | -2.94 |
| 5274 | CCC(=O)OC/C=C/C                  | C03074855 | -12.45 | -0.18 | -13.72 | 3.49 | -2.04 |
| 5275 | c1csc2n1cc(n2)CO                 | C04262675 | -12.45 | -3.11 | -15.69 | 7.45 | -1.1  |
| 5276 | c1c(n[nH]n1)CO                   | C04343262 | -12.45 | -3.37 | -15.75 | 4.49 | 2.17  |
| 5277 | c1cnc2c(c1)cn[nH]2               | C04771835 | -12.45 | -2.74 | -11.86 | 4.4  | -2.25 |
| 5278 | c1ccc(cc1)C[C@H](C)C2nc[nH]n2)O  | C05487491 | -12.45 | -1.68 | -18.47 | 5.28 | 2.42  |
| 5279 | C1CCN(C1)C(=S)N                  | C05566863 | -12.45 | -0.66 | -15.96 | 2.79 | 1.37  |
| 5280 | CC1=C(CCCCC1=O                   | C05767016 | -12.45 | -0.78 | -12.97 | 4.63 | -3.33 |
| 5281 | c1cc(cc1)/C(=C/C(=O)C(F)(F)F)/O  | C12358666 | -12.45 | -0.33 | -12.5  | 3.8  | -3.43 |
| 5282 | Cn1ccc(n1)Cl                     | C12370914 | -12.45 | -0.6  | -15.02 | 5.13 | -1.95 |
| 5283 | COC(=O)COCc1cccc1                | C26515754 | -12.45 | -1.4  | -16.78 | 8.85 | -3.13 |
| 5284 | CNC(=O)c1cn[nH]c1N               | C29865936 | -12.45 | -7.13 | -15.23 | 8.5  | 1.41  |
| 5285 | C(c1nnc(s1)N)Cl                  | C32500431 | -12.45 | -2.1  | -16.9  | 7.62 | -1.07 |
| 5286 | CC(=O)c1ccccc1N                  | C00164490 | -12.44 | -1.71 | -12.6  | 4.22 | -2.36 |
| 5287 | Cn1cccc1=O                       | C00331653 | -12.44 | -2.24 | -16.45 | 8.72 | -2.48 |
| 5288 | COC(=O)COC1cccc1                 | C00409231 | -12.44 | -3.04 | -11.81 | 6.61 | -4.2  |
| 5289 | C(OC(C(F)(F)F)C(F)(F)F)F         | C01530810 | -12.44 | -0.53 | -12.73 | 4.4  | -3.58 |
| 5290 | CC(C)OC(=O)C=C                   | C01665003 | -12.44 | -1.28 | -11.88 | 3.96 | -3.25 |
| 5291 | CC(=C)OC                         | C02041033 | -12.44 | -0.64 | -11.82 | 1.59 | -1.58 |
| 5292 | CC(=O)CCn1cncn1                  | C02555552 | -12.44 | -2.27 | -12.69 | 6.56 | -4.03 |
| 5293 | CCN1C(=O)CC(=O)NC1=O             | C04085830 | -12.44 | 0.78  | -18.55 | 5.63 | -0.3  |
| 5294 | Cn1c(=S)[nH][nH]c1=S             | C05783563 | -12.44 | -2.41 | -13.79 | 5.83 | -2.07 |
| 5295 | c1ccc(c(c1)Nc2nccn2)F            | C06665761 | -12.44 | 0.96  | -13.7  | 5.91 | -5.61 |
| 5296 | c1c(cnc(n1)O)Br                  | C12360026 | -12.44 | -1.17 | -17.55 | 4.06 | 2.21  |
| 5297 | c1c(c(n1)CO)Br                   | C12394771 | -12.44 | -2.6  | -14.78 | 4.4  | 0.54  |
| 5298 | C/C=C/CC#N                       | C13526271 | -12.44 | -1.02 | -12.7  | 4.27 | -3    |
| 5299 | Cn1cc(nc1N)O                     | C14246971 | -12.44 | -5.05 | -15.76 | 7.46 | 0.92  |
| 5300 | c1(c(non1)N)N=Nc2c(non2)N)N      | C15938951 | -12.44 | -2.02 | -18.16 | 7.18 | 0.56  |
| 5301 | c1cc(ncc1Br)CC#N                 | C21993125 | -12.44 | -3.63 | -13.75 | 8.4  | -3.46 |
| 5302 | Cc1c(c(c(n1)C)N)N                | C26896001 | -12.44 | -5.27 | -14.47 | 7.12 | 0.17  |
| 5303 | c1cc2nccn2cc1Cl                  | C00170151 | -12.43 | -2.89 | -10.26 | 4.79 | -4.07 |
| 5304 | c1cc(cnc1)NC=O                   | C00392672 | -12.43 | -1.71 | -18.31 | 7.34 | 0.26  |
| 5305 | Cc1c(ccc1=O)O                    | C01293553 | -12.43 | -3.65 | -16.53 | 8.84 | -1.09 |
| 5306 | Cn1c(=O)c(c[nH]c1=O)F            | C01571650 | -12.43 | -4.17 | -17.33 | 9.61 | -0.54 |

|      |                                |           |        |       |        |       |       |
|------|--------------------------------|-----------|--------|-------|--------|-------|-------|
| 5307 | c1ccc(cc1)CC(=O)C=O            | C01577749 | -12.43 | -0.7  | -20.03 | 10.27 | -1.97 |
| 5308 | CCOC(=O)C(C(C(F)(F)F)(F)F)(F)F | C01666909 | -12.43 | 2.02  | -11.16 | 1.67  | -4.95 |
| 5309 | C1C=CCC1O                      | C01721045 | -12.43 | -2.03 | -11.92 | 1.99  | -0.46 |
| 5310 | CC[C@@H](C=C)O                 | C02034403 | -12.43 | -0.18 | -12.49 | 1.22  | -0.98 |
| 5311 | c1cc(c(c1)Cl)OF                | C02382268 | -12.43 | -0.3  | -15.81 | 3.67  | 0.02  |
| 5312 | CCOC1ccc(c1)F                  | C02567870 | -12.43 | -1.81 | -11.99 | 3.46  | -2.09 |
| 5313 | C1CNn2c(nnn2)N1                | C03163359 | -12.43 | -3.34 | -17.34 | 8.46  | -0.22 |
| 5314 | c1c(=O)[nH]c(nc1F)N            | C05037825 | -12.43 | -5.41 | -17.23 | 10.67 | -0.45 |
| 5315 | CCOc1nccc(n1)[O-]              | C05285461 | -12.43 | -3.22 | -15.04 | 5.68  | 0.16  |
| 5316 | Cc1c[nH]c([nH+])C              | C05425079 | -12.43 | -3.44 | -13.06 | 6.16  | -2.09 |
| 5317 | [H]N=C(N(C)C)Cl                | C05508944 | -12.43 | -1.79 | -12.62 | 1.93  | 0.05  |
| 5318 | c1cc(oc1)c2cccc2               | C05843207 | -12.43 | 1.09  | -16.28 | 4.81  | -2.05 |
| 5319 | C1CSC(=NC1=O)N                 | C12651529 | -12.43 | -1.99 | -15.17 | 5     | -0.28 |
| 5320 | c1c(nc(s1)Cl)CO                | C15444551 | -12.43 | -2.36 | -13.42 | 3.13  | 0.22  |
| 5321 | CCc1ccc(s1)CC#N                | C19440060 | -12.43 | -2.23 | -11.27 | 5.89  | -4.81 |
| 5322 | c1cc(c(nc1CBr)N)[N+](=O)[O-]   | C21985814 | -12.43 | -3.8  | -12.15 | 6.11  | -2.59 |
| 5323 | C=CC(=O)OCCC#N                 | C01561512 | -12.42 | -1.94 | -14.96 | 7.65  | -3.17 |
| 5324 | c1c(c(=O)[nH]c(=O)[nH1])Cl     | C01646314 | -12.42 | -5.04 | -16.81 | 8.99  | 0.44  |
| 5325 | c1cc(c(cc1F)F)C=O              | C02004034 | -12.42 | -1.29 | -15.14 | 7.24  | -3.24 |
| 5326 | C/C=C/BrO                      | C03070145 | -12.42 | -3.2  | -13.12 | 2.49  | 1.41  |
| 5327 | Cn1nnc1SCC#N                   | C05749026 | -12.42 | -0.33 | -18.14 | 8.23  | -2.18 |
| 5328 | CC(=O)/C=C/Cc1ccc1             | C12370861 | -12.42 | -1.42 | -13.25 | 6.45  | -4.21 |
| 5329 | c1cc(c(c1)F)F)NC(=S)N          | C16125756 | -12.42 | -2.19 | -16.04 | 8.62  | -2.81 |
| 5330 | CC[C@H]1[C@H](O)CC             | C17059632 | -12.42 | -0.44 | -12.27 | 2.47  | -2.19 |
| 5331 | C1[C@H]1[C@@H](C@H)1F)C(=O)Cl  | C21989319 | -12.42 | -1.05 | -13.06 | 4.25  | -2.55 |
| 5332 | CC(=O)/C=C/C)Cl                | C22000861 | -12.42 | 0.77  | -16.65 | 6.11  | -2.64 |
| 5333 | c1ccc(cc1)Nc2ncccc2            | C00282566 | -12.41 | 1.06  | -16.91 | 6.31  | -2.87 |
| 5334 | C=COCCCI                       | C01586527 | -12.41 | 0.02  | -13.15 | 3.09  | -2.36 |
| 5335 | CC[C@H](N+)(=O)[O-]Cl          | C01586658 | -12.41 | -0.41 | -12.16 | 2.92  | -2.76 |
| 5336 | CCOCC                          | C02031623 | -12.41 | -0.07 | -11.22 | 1.24  | -2.36 |
| 5337 | CCOC(=O)CCN=C=O                | C02555344 | -12.41 | -2.88 | -12.56 | 3.7   | -0.67 |
| 5338 | CC(=O)OCCC#N                   | C04804419 | -12.41 | -1.55 | -14.37 | 5.65  | -2.13 |
| 5339 | C1COCC=C1Cl                    | C05104113 | -12.41 | -0.02 | -14.46 | 1.81  | 0.26  |
| 5340 | COc1ccc2c(c1)[nH]n2            | C05115788 | -12.41 | -3.66 | -13.76 | 5.79  | -0.79 |
| 5341 | C=CC[C@H]1[C@H](C(F)F)F)O      | C08698314 | -12.41 | -1.56 | -11.74 | 2.02  | -1.14 |
| 5342 | c1c(cc(cc1F)Br)O               | C12957254 | -12.41 | -0.7  | -12.25 | 2.32  | -1.77 |
| 5343 | c1cc(c(cc1N))O                 | C14628844 | -12.41 | -1.11 | -13.74 | 3.04  | -0.59 |
| 5344 | c1cc(nc2c1cc[nH]2)F            | C14984906 | -12.41 | -2.07 | -13.6  | 6.05  | -2.79 |
| 5345 | c1ccc(c(c1)C/C(=N/O)N)F        | C16082806 | -12.41 | -1.78 | -16.55 | 7.34  | -1.43 |
| 5346 | C/C=C/C=C/N/O                  | C17147402 | -12.41 | -1.25 | -14.08 | 4.28  | -1.37 |
| 5347 | CN1C(=O)C(=O)N(C1=O)CC#N       | C20296437 | -12.41 | -0.67 | -19.43 | 8.87  | -1.18 |
| 5348 | c1nc2ncccc1N                   | C00167784 | -12.4  | -2.8  | -16.12 | 9.93  | -3.42 |
| 5349 | CC(=O)NCC(=O)OC                | C00399511 | -12.4  | -0.99 | -16.65 | 5.57  | -0.33 |
| 5350 | c1c(nc(nc1N)N)N                | C01511136 | -12.4  | -4.72 | -14.99 | 5.65  | 1.66  |
| 5351 | Cc1nnc(s1)[N+](=O)[O-]         | C01615110 | -12.4  | -2.8  | -14.02 | 7.14  | -2.73 |
| 5352 | C1CCSC1                        | C01680812 | -12.4  | -0.14 | -11.24 | 1.88  | -2.9  |
| 5353 | C1C[C@H](C=C1)C#N              | C01765792 | -12.4  | -1.17 | -13.29 | 3.94  | -1.88 |
| 5354 | c1ccc(c(c1)c2cccc2)N           | C02525621 | -12.4  | -1.13 | -14.63 | 3.67  | -0.31 |
| 5355 | c1cc(c(c1)F)[N+](=O)[O-]F      | C02557001 | -12.4  | -3.29 | -15.2  | 8.47  | -2.38 |
| 5356 | CC1=CSCCO1                     | C04887560 | -12.4  | -0.39 | -14.42 | 2.69  | -0.27 |
| 5357 | Cc1ccc(c(=O)[nH]1)C#N          | C08612407 | -12.4  | -1.61 | -17.5  | 6.57  | 0.14  |
| 5358 | c1c(nc[nH]c1=O)N               | C08613061 | -12.4  | -3.23 | -16.79 | 5.3   | 2.32  |
| 5359 | c1cc2c(cc1O)nsn2               | C12341371 | -12.4  | -2.81 | -14.89 | 5     | 0.3   |
| 5360 | CC(=O)N=C(N)SC                 | C15024454 | -12.4  | -4.01 | -13.44 | 5.28  | -0.23 |
| 5361 | c1cc(sc1N=C=O)Br               | C19432378 | -12.4  | -2.17 | -9.72  | 1.23  | -1.74 |
| 5362 | c1csc2c1[C@@H](C2)Cl           | C19727151 | -12.4  | -0.3  | -10.09 | 2.43  | -4.44 |
| 5363 | Cc1cc(ccc1S)F                  | C20247138 | -12.4  | -0.19 | -9.7   | 1.49  | -4    |
| 5364 | c1cc(c(c1)F)OC(F)(F)F          | C22057469 | -12.4  | 1.25  | -15.05 | 4.87  | -3.47 |
| 5365 | CC(=O)Nc1cc(ccc1F)F            | C00398779 | -12.39 | -1.42 | -14.16 | 5.99  | -2.8  |
| 5366 | CCC(=O)OCCI                    | C01680716 | -12.39 | -0.83 | -14.4  | 4.21  | -1.38 |
| 5367 | CC(=CC(=O)N)C                  | C01684064 | -12.39 | -2.54 | -14.46 | 4.73  | -0.12 |
| 5368 | Cc1ccc(cc1)SC                  | C01693361 | -12.39 | 0.52  | -14.31 | 2.29  | -0.9  |
| 5369 | Cc1cc(cs1)Br                   | C02528624 | -12.39 | -0.94 | -13    | 1.55  | 0     |
| 5370 | C1(=C(C(=O)SC1=O)Cl)Cl         | C05478084 | -12.39 | 1.11  | -12.38 | 1.02  | -2.14 |
| 5371 | CC(=O)CSc1cn[nH]n1             | C07344306 | -12.39 | -2.46 | -14.72 | 5.73  | -0.95 |
| 5372 | Cc1c(c(on1)N)I                 | C12481600 | -12.39 | -3.48 | -11.88 | 3.31  | -0.34 |
| 5373 | c1cc(ccc1C=C)COCl              | C13542609 | -12.39 | -1.57 | -11.51 | 3.11  | -2.42 |
| 5374 | c1cc2ncccc1N                   | C18555973 | -12.39 | -3.31 | -13.77 | 6.69  | -2    |
| 5375 | c1cc(c(cc1F)C)N)F              | C19482514 | -12.39 | 3.66  | -17.2  | 2.56  | -1.41 |
| 5376 | CCNc1ccc(c1)F)F                | C19918384 | -12.39 | -3.41 | -9.52  | 3.81  | -3.26 |
| 5377 | Cc1cc(c([nH+]c1)Cl)[O-]        | C21981922 | -12.39 | -2.63 | -12.68 | 3.83  | -0.9  |
| 5378 | c1c(cnc(c1[N+](=O)[O-])F)Br    | C21981951 | -12.39 | -2.15 | -11.34 | 4.08  | -2.98 |
| 5379 | Cc1ccc(nc1)C(F)F)F             | C21985793 | -12.39 | -1.76 | -11.33 | 4.13  | -3.43 |
| 5380 | Cc1cc(on1)C(=O)C               | C26506537 | -12.39 | 1.44  | -15.46 | 4.02  | -2.4  |
| 5381 | c1cc(sc1)C(=C)C(=O)[O-]        | C26515478 | -12.39 | 0.76  | -16.13 | 5.58  | -2.6  |
| 5382 | CC(=O)Cc1cccs1                 | C00163136 | -12.38 | -1.55 | -12.72 | 5.64  | -3.75 |
| 5383 | c1cc(n2cccnc2c1)N              | C00337657 | -12.38 | -1.6  | -15.03 | 6.93  | -2.67 |
| 5384 | C=CC1OCCO1                     | C00396113 | -12.38 | 0.15  | -14.35 | 3.01  | -1.2  |
| 5385 | CSC1=[NH+][C]CN1               | C01634181 | -12.38 | -1.08 | -13.93 | 2.79  | -0.16 |
| 5386 | c1cc(c(cc1N)C#N)F              | C02565103 | -12.38 | 1.44  | -17.2  | 5.48  | -2.1  |
| 5387 | CC(=O)C1c(ccc1F)F              | C02579282 | -12.38 | -0.18 | -13.32 | 5.55  | -4.43 |
| 5388 | c1c(ncs1)CC#N                  | C02584053 | -12.38 | -1.49 | -17.79 | 7.92  | -1.01 |
| 5389 | C1=Nc2c(non2)NN=C1             | C03204866 | -12.38 | -4.53 | -20.33 | 11.88 | 0.59  |
| 5390 | CCOC(=O)[C@H]1[C@@H](C@H)1C=O  | C04528550 | -12.38 | -0.81 | -14.99 | 6.74  | -3.31 |
| 5391 | CN(C(=O)OCCC)N=O               | C04804540 | -12.38 | -0.17 | -15.67 | 4.5   | -1.04 |
| 5392 | c1cc(c(=O)[nH]c1)F             | C08698105 | -12.38 | -3.16 | -15.38 | 5.23  | 0.93  |
| 5393 | c1c[nH]c(=O)c2c1ccc2           | C16972974 | -12.38 | -2.15 | -17.14 | 6.19  | 0.72  |
| 5394 | c1cc(c(c1)F)Cn2c(ccn2)N)F      | C19689160 | -12.38 | 1.71  | -17.09 | 6.91  | -3.91 |
| 5395 | COCC1nc(cs1)CCl                | C26511167 | -12.38 | -2.25 | -13.18 | 5.09  | -2.04 |
| 5396 | Cc1csc(n1)CF                   | C32500872 | -12.38 | -2.03 | -12.27 | 4.34  | -2.42 |

|      |                                   |           |        |       |        |       |       |
|------|-----------------------------------|-----------|--------|-------|--------|-------|-------|
| 5397 | c1cc(ncc1Br)Br                    | C00343301 | -12.37 | -1.58 | -13.95 | 2.19  | 0.97  |
| 5398 | CC(=O)COC(=O)C                    | C01640814 | -12.37 | -0.35 | -15.76 | 6.59  | -2.84 |
| 5399 | COCc1ccco1                        | C01668230 | -12.37 | -1.16 | -13.88 | 3.83  | -1.16 |
| 5400 | c1cnn(c1)CO                       | C01682023 | -12.37 | -4.98 | -13.41 | 4.96  | 1.04  |
| 5401 | C1=CC(=O)N(C1=O)CSC#N             | C01868507 | -12.37 | 0.48  | -19.39 | 8.38  | -1.86 |
| 5402 | COC(=O)CN=C=O                     | C02547543 | -12.37 | -0.49 | -12.04 | 2.14  | -1.98 |
| 5403 | COC(=O)CN=C=O                     | C03139118 | -12.37 | -2.15 | -15.6  | 5.86  | -0.48 |
| 5404 | c1cc(ccc1N)[N+](=O)[O-]           | C03860644 | -12.37 | -3.35 | -13.61 | 6.72  | -2.13 |
| 5405 | c1cn(c(=O)[nH]c1=O)C/C=N/O        | C04032019 | -12.37 | -2.64 | -21.85 | 10.25 | 1.87  |
| 5406 | c1cc(cc(c1)F)/C(=N/O)/N           | C06863049 | -12.37 | -4.95 | -13.98 | 5.76  | 0.79  |
| 5407 | COC(=O)CN1C(=O)CSC1=O             | C08092047 | -12.37 | 1.88  | -19.93 | 7.76  | -2.08 |
| 5408 | Cc1ccccc1N1CC#N                   | C13281490 | -12.37 | -6.07 | -5.38  | 3.83  | -4.74 |
| 5409 | CS(=O)(=O)n1cc(cn1)Cl             | C14218611 | -12.37 | -1.87 | -18.95 | 8.61  | -0.16 |
| 5410 | C1=C[NH+]=C/C(=C/N=O)/N1          | C17423937 | -12.37 | -3.67 | -16.36 | 7.1   | 0.55  |
| 5411 | c1cnc(nc1)NCC(F)(F)F              | C19231842 | -12.37 | -2.26 | -10.8  | 4.3   | -3.61 |
| 5412 | CC1=C(C(=O)CC1)O                  | C21300156 | -12.37 | -2.4  | -14.73 | 5.53  | -0.77 |
| 5413 | CC(=O)OC                          | C01699947 | -12.36 | -0.86 | -12.96 | 3.66  | -2.21 |
| 5414 | c1ccc(cc1)NCCCI                   | C01712525 | -12.36 | -1.15 | -9.79  | 2.28  | -3.69 |
| 5415 | CC(=O)C[C@H]1CCC=C1               | C02036659 | -12.36 | -0.89 | -11.46 | 3.97  | -3.98 |
| 5416 | C=CCCO                            | C02038899 | -12.36 | -0.13 | -13.75 | 3.99  | -2.47 |
| 5417 | c1c(ncs1)CO                       | C02527711 | -12.36 | -2.16 | -14.93 | 4.04  | 0.68  |
| 5418 | CC(=O)OCCCI                       | C04887626 | -12.36 | -1.1  | -12.92 | 4.47  | -2.81 |
| 5419 | C=C/C=C/C#N                       | C05542734 | -12.36 | -1.27 | -13.97 | 5.22  | -2.34 |
| 5420 | COC/C(=N/O)/N                     | C06453315 | -12.36 | -3.44 | -14.97 | 4.06  | 1.99  |
| 5421 | c1cnc(c1)C=O)Cl                   | C12958751 | -12.36 | -2.28 | -11.31 | 3.36  | -2.12 |
| 5422 | CCOc1[nH]c(=O)c(cn1)F             | C14982788 | -12.36 | -3.54 | -15.84 | 6.88  | 0.15  |
| 5423 | c1cc2c(nc1)NC(=O)C2               | C14984260 | -12.36 | 0.1   | -16.96 | 6.31  | -1.81 |
| 5424 | CC/C=C/Cn1cnc1                    | C15776518 | -12.36 | -1.48 | -11.42 | 5.59  | -5.05 |
| 5425 | C1[C@@H]2C=C[C@@H]2CC1=O          | C17120047 | -12.36 | -0.83 | -11.22 | 2.9   | -3.21 |
| 5426 | COC1ccc(c(c1)N)F                  | C21304447 | -12.36 | -2.09 | -12.82 | 3.83  | -1.28 |
| 5427 | c1nnc(n1)CCO                      | C21983799 | -12.36 | -2.77 | -16.38 | 5.84  | 0.95  |
| 5428 | c1ccc2c(c1)[nH]c(n2)CO            | C00158650 | -12.35 | -4.89 | -13.7  | 6.74  | -0.5  |
| 5429 | C1C[C@H](C=C1)CO                  | C01767933 | -12.35 | -1.27 | -12.15 | 2.14  | -1.07 |
| 5430 | Cn1cc(cn1)C#N                     | C02537518 | -12.35 | -0.17 | -16.55 | 6.32  | -1.95 |
| 5431 | C(CBr)N=C=O                       | C02556964 | -12.35 | 0.29  | -14.45 | 1.86  | -0.06 |
| 5432 | Cn1ccnc1Br                        | C02577853 | -12.35 | -2.1  | -12.2  | 4.75  | -2.81 |
| 5433 | [C@@H](C)[O]C[C@@H](F)(F)C(F)(F)F | C04266028 | -12.35 | -2.33 | -10.9  | 4.1   | -3.22 |
| 5434 | C1(=S)NCC(=S)NN1                  | C05566462 | -12.35 | -2.9  | -16.35 | 3.67  | 3.24  |
| 5435 | c1nc(c(cn1)Cl)N[O-]               | C08964409 | -12.35 | -4.53 | -14.67 | 4.38  | 2.46  |
| 5436 | CCNC1=NCCCS1                      | C15417787 | -12.35 | -0.89 | -12.07 | 2.6   | -2    |
| 5437 | C1CNC(=NH2+)NC1=O                 | C16990869 | -12.35 | -3.85 | -15.68 | 6.73  | 0.46  |
| 5438 | c1cc(=O)[nH]c(c1[N+](=O)[O-])N    | C21985741 | -12.35 | -4.84 | -19.16 | 11.42 | 0.22  |
| 5439 | Cc1c(nc(nH1)Cl)C                  | C22126106 | -12.35 | -1.6  | -13.57 | 5.29  | -2.48 |
| 5440 | C(#N)Sc1c(nc(n1)N)N               | C32106105 | -12.35 | -3.5  | -17.96 | 9.33  | -0.22 |
| 5441 | c1ccc2c(c1)OC(O2)(F)F             | C00157363 | -12.34 | 0.82  | -16.31 | 4.2   | -1.05 |
| 5442 | Cc1c(nc(nH1)O-)C                  | C00162747 | -12.34 | -4.4  | -15.08 | 5.28  | 1.86  |
| 5443 | Cc1ccc(c1)O)N                     | C01433370 | -12.34 | -3.64 | -11.43 | 2.99  | -0.26 |
| 5444 | Cc1ccc(c1)N=C=O                   | C01845941 | -12.34 | -1.41 | -10.43 | 1.91  | -2.4  |
| 5445 | C(CC(=O)Cl)CCI                    | C02242611 | -12.34 | -1.05 | -12.57 | 4.32  | -3.03 |
| 5446 | Cc1cc(nc1)F)N                     | C02384018 | -12.34 | -1.79 | -16.27 | 5.11  | 0.61  |
| 5447 | c1c(c(cc1)F)F)C=O                 | C04290143 | -12.34 | -1.76 | -13.84 | 6.04  | -2.78 |
| 5448 | c1cc(c(nc1)C=O)N                  | C04352694 | -12.34 | -5.65 | -15.55 | 9.23  | -0.38 |
| 5449 | C[C@H]([N+](=O)[O-])Cl            | C04409862 | -12.34 | -0.5  | -12.94 | 3.35  | -2.25 |
| 5450 | C[C@H]1CN(C(=NH2+))S1C            | C05125599 | -12.34 | 0.01  | -14.23 | 3.94  | -2.07 |
| 5451 | c1c(c(n1)C(=S)N)N)C#N             | C06495096 | -12.34 | -1.84 | -17.09 | 7.9   | -1.32 |
| 5452 | C=CC(=O)OC/C=C)Cl                 | C08580935 | -12.34 | -0.3  | -13.14 | 4.73  | -3.64 |
| 5453 | CCOC(=S)S                         | C12358685 | -12.34 | -1.06 | -13.57 | 4.17  | -1.88 |
| 5454 | c1csc2n1c(cn2)C#N                 | C13211756 | -12.34 | -0.25 | -14.85 | 6.11  | -3.35 |
| 5455 | CCc1ccc(o1)C#N                    | C15783907 | -12.34 | -0.2  | -12.54 | 3.92  | -3.52 |
| 5456 | CC(=O)OCc1ccc(nH1)c1=O            | C16998256 | -12.34 | -0.67 | -19.15 | 7.85  | -0.38 |
| 5457 | CN(C)c1nc(nH1)N=[N+]=[N-]         | C17024977 | -12.34 | 1.16  | -15.95 | 5.28  | -2.84 |
| 5458 | CCNC(=S)N                         | C18191765 | -12.34 | -1.13 | -12.03 | 1.81  | -1    |
| 5459 | c1ccc2c(c1)c(c(nH2)N)C=O          | C19087881 | -12.34 | -3.52 | -11.3  | 4.45  | -1.97 |
| 5460 | c1c(nH1)n1N                       | C21303334 | -12.34 | -5.68 | -13.26 | 5.47  | 1.13  |
| 5461 | Cc1c(ncn1)C                       | C00003183 | -12.33 | -0.65 | -14.39 | 4.23  | -1.52 |
| 5462 | COc1cccc(c1)N                     | C00157531 | -12.33 | -2.01 | -12.34 | 3.28  | -1.25 |
| 5463 | CCn1c(cc(=O)[nH]c1=O)N            | C00399854 | -12.33 | -4.42 | -17.6  | 9.81  | -0.11 |
| 5464 | c1cc(cc(c1)O)[N+](=O)[O-]         | C01576887 | -12.33 | -3.04 | -13.66 | 6.12  | -1.75 |
| 5465 | c1c(ncs1)CONC(=O)N                | C01705603 | -12.33 | -4.62 | -18.89 | 10.34 | 0.84  |
| 5466 | C[C@H]1CCC(=O)C1                  | C02039266 | -12.33 | -0.63 | -12.01 | 3.13  | -2.82 |
| 5467 | C(=NC)Cl)Cl)Cl)O                  | C04262410 | -12.33 | -0.18 | -12.17 | 0.45  | -0.42 |
| 5468 | CC1=NCC[C@H]1[N+](=O)[O-]         | C05306562 | -12.33 | -0.96 | -17.4  | 4.54  | 1.48  |
| 5469 | c1nc(nn1)CC(F)F[N+](=O)[O-]       | C12397049 | -12.33 | -2.81 | -16.14 | 12.32 | -5.71 |
| 5470 | c1c(nH1)c(=O)[nH]c1=S)[O-]        | C17779396 | -12.33 | -3.47 | -16.8  | 6.86  | 1.08  |
| 5471 | CCc1ccn(n1)C                      | C26547541 | -12.33 | -0.32 | -14.06 | 4.67  | -2.62 |
| 5472 | Cc1cc[nH+]c(c1)N[N+](=O)[O-]      | C01605247 | -12.32 | -5.03 | -17.13 | 13.02 | -3.18 |
| 5473 | Cc1ccc(cc1)NO                     | C01607220 | -12.32 | -3.52 | -13.65 | 4.16  | 0.69  |
| 5474 | C(#N)/C(=C/C#N)N)N                | C02039806 | -12.32 | -2.62 | -15.08 | 4.43  | 0.95  |
| 5475 | COC(=O)OCC=C                      | C02504725 | -12.32 | -0.9  | -12.21 | 3.43  | -2.64 |
| 5476 | c1csc(n1)C=O                      | C02512364 | -12.32 | -2.17 | -16.71 | 7.62  | -1.05 |
| 5477 | c1cn(nc1)C(=O)NN(C)F)F            | C02521253 | -12.32 | -1.53 | -20.14 | 8.6   | 0.75  |
| 5478 | c1(c(c(c(c1)F)Cl)F)F)O            | C02530822 | -12.32 | 0.21  | -13.43 | 2.29  | -1.4  |
| 5479 | C=CCOCC(C(F)F)(F)F                | C02576921 | -12.32 | -1.18 | -10.95 | 2.88  | -3.08 |
| 5480 | CSC(=NH2+)N                       | C04676170 | -12.32 | -2.72 | -11.89 | 2.12  | 0.17  |
| 5481 | CC(=O)CCn1ccnc1                   | C05480858 | -12.32 | -2.21 | -15.3  | 6.53  | -1.34 |
| 5482 | C/C(=N)OC(=O)C/C(=O)C             | C05543789 | -12.32 | -1.63 | -14.16 | 6.4   | -2.93 |
| 5483 | CC1=C[C@H]([OC1=O)O               | C05665331 | -12.32 | -2.54 | -15.46 | 6.8   | -1.12 |
| 5484 | C(#N)N=C(N)O                      | C06661263 | -12.32 | -7.48 | -12.23 | 5.82  | 1.57  |
| 5485 | c1cc(c(c1)F)C(F)F)O               | C08100952 | -12.32 | -2.31 | -11.4  | 3.39  | -2    |
| 5486 | CCn1ccc(c1)C=O                    | C08728204 | -12.32 | -1.47 | -13.46 | 6.07  | -3.47 |

|      |                                                 |           |        |       |        |       |       |
|------|-------------------------------------------------|-----------|--------|-------|--------|-------|-------|
| 5487 | CC(C)CCN=C=O                                    | C11802388 | -12.32 | 0.25  | -13.36 | 1.66  | -0.87 |
| 5488 | c1cc2c(c[nH]c2nc1)C#N                           | C14984912 | -12.32 | -4.86 | -11.91 | 7.54  | -3.09 |
| 5489 | C(C(=NH2+)N)OCC(F)(F)F                          | C19427472 | -12.32 | -5.84 | -13.85 | 7.11  | 0.24  |
| 5490 | c1cc(c(=O)oc1)I                                 | C21989735 | -12.32 | -0.36 | -16.69 | 8.24  | -3.51 |
| 5491 | c1nncn1NC(=[NH2+])N                             | C26953640 | -12.32 | -2.53 | -18.56 | 10.95 | -2.19 |
| 5492 | c1cnc1Cn2c(ccn2)N                               | C00819617 | -12.31 | 0.15  | -16.93 | 6.8   | -2.33 |
| 5493 | #C#CC1c1ccccc1O                                 | C01639886 | -12.31 | -2.15 | -15.01 | 5.53  | -0.68 |
| 5494 | c1ccc(cc1)C[n+] <sub>2</sub> cc(on2)[O-]        | C01682005 | -12.31 | -2.41 | -14.45 | 9.52  | -4.96 |
| 5495 | CCC(=O)Br                                       | C01846004 | -12.31 | -0.68 | -12.08 | 2.5   | -2.04 |
| 5496 | Cc1c(oc(=O)o1)C                                 | C02504803 | -12.31 | -2.34 | -13.24 | 6.34  | -3.06 |
| 5497 | CC(=O)Cc1ccc(cc1F)F                             | C02579281 | -12.31 | -1.85 | -12.33 | 6.34  | -4.46 |
| 5498 | CC(=O)n1c(nc(n1)N)N                             | C03163360 | -12.31 | -2.43 | -12.6  | 4.98  | -2.26 |
| 5499 | Cc1ccnnc1C(=O)N                                 | C03848319 | -12.31 | -3.45 | -14.43 | 5.64  | -0.07 |
| 5500 | c1(nc(nH)n1)[S-])C(F)(F)F                       | C04716371 | -12.31 | -7.14 | -14.47 | 11.45 | -2.14 |
| 5501 | c1ccc(cc1)NNC(F)(F)F                            | C05224748 | -12.31 | -0.31 | -14.56 | 1.88  | 0.68  |
| 5502 | c1cc(c(nc1)Cl)C(=N/O)/N                         | C06658112 | -12.31 | -4.16 | -15.79 | 7.67  | -0.03 |
| 5503 | Cc1ccn(n1)CCl                                   | C09547120 | -12.31 | -2.38 | -10.6  | 3.98  | -3.31 |
| 5504 | C1C/C(=C(\C(F)(F)F)[O-])/C(=O)C1                | C12394374 | -12.31 | -4.03 | -8.93  | 3.42  | -2.77 |
| 5505 | c1(c(nH)nc1N)C(F)(F)Br                          | C12395922 | -12.31 | -2.2  | -11.9  | 2.68  | -0.9  |
| 5506 | CCC(=[NH2+])NN                                  | C16082678 | -12.31 | -2.88 | -12.77 | 3.01  | 0.33  |
| 5507 | c1ccc(cc1)N=C=S                                 | C00164776 | -12.3  | -0.93 | -11.96 | 4.62  | -4.04 |
| 5508 | COc1ccc(cc1)Cl                                  | C00388374 | -12.3  | 0.98  | -14.74 | 2.26  | -0.81 |
| 5509 | C/C=C/[C@H]1C=CC(=O)O1                          | C01668307 | -12.3  | -0.78 | -15.08 | 7.16  | -3.6  |
| 5510 | C=CCN1C(=O)C=CC1=O                              | C01720445 | -12.3  | -0.89 | -14.91 | 5.81  | -2.31 |
| 5511 | C1CCC(C1)CO                                     | C01845720 | -12.3  | -3.28 | -9.29  | 1.81  | -1.53 |
| 5512 | c1cc2cnc1cc2                                    | C01847613 | -12.3  | -1.28 | -14.41 | 5.74  | -2.35 |
| 5513 | c1cnn(c1)CC#N                                   | C02538878 | -12.3  | -2.06 | -17.43 | 9.43  | -2.25 |
| 5514 | C=C=C/[P@@H]1(=O)[O-]                           | C05377186 | -12.3  | -5.79 | -13.69 | 7.96  | -0.78 |
| 5515 | C(=C/C#N)C=C/C#N                                | C05409892 | -12.3  | -1.97 | -15.53 | 8.58  | -3.39 |
| 5516 | CCOC(=O)O                                       | C05856362 | -12.3  | -4.68 | -11.25 | 4.23  | -0.61 |
| 5517 | Cc1nccn1C                                       | C08294951 | -12.3  | -1.06 | -14.07 | 5.46  | -2.62 |
| 5518 | Cc1c(c[nH]n1)/C=N/O                             | C12525130 | -12.3  | -3.06 | -15    | 5.3   | 0.46  |
| 5519 | Cc1[nH]c2cc(ccc2n1)F                            | C12672023 | -12.3  | -4.06 | -11.79 | 6.73  | -3.19 |
| 5520 | CC1NNC(=S)NN1                                   | C18204142 | -12.3  | -0.97 | -15.43 | 3.8   | 0.31  |
| 5521 | CCc1cccc1S                                      | C19735106 | -12.3  | -1    | -8.48  | 1.66  | -4.49 |
| 5522 | c1ccc(cc1F)NCCO)F                               | C20045173 | -12.3  | -2.35 | -13.6  | 4.35  | -0.69 |
| 5523 | c1c(nsn1)N                                      | C26479221 | -12.3  | -4.19 | -14.2  | 5.35  | 0.74  |
| 5524 | CCNc1cc(ccn1)Cl                                 | C32914833 | -12.3  | 0.75  | -12.76 | 2.69  | -2.98 |
| 5525 | COc(=O)CSCC=C                                   | C01626921 | -12.29 | -0.82 | -13.03 | 5.17  | -3.62 |
| 5526 | C1CN=C(N1)Cl                                    | C01670679 | -12.29 | -0.89 | -14.29 | 2.76  | 0.14  |
| 5527 | COC(=O)C[C@@H]1CSCC1=O                          | C05759397 | -12.29 | -0.36 | -16.27 | 8.28  | -3.94 |
| 5528 | c1(c[nH]c(=O)[nH]c1=O)N/O                       | C05783668 | -12.29 | -5.85 | -18.88 | 7.88  | 4.56  |
| 5529 | C(c1c(non1)N)Oc2c(non2)N                        | C06691161 | -12.29 | -2.7  | -21.26 | 9.18  | 2.5   |
| 5530 | c1c(cnc(c1[N+](=O)[O-])Cl)F                     | C08698159 | -12.29 | -2.07 | -12.82 | 3.68  | -1.08 |
| 5531 | c1cc([nH]c1)C(=O)CC#N                           | C14007813 | -12.29 | -2.04 | -17.94 | 10.32 | -2.63 |
| 5532 | c1c(c(nH)1)N=[N+]=[N-])C(=O)N                   | C16952135 | -12.29 | -3.23 | -19.09 | 7.46  | 2.57  |
| 5533 | C=CCn1c(nnn1)N                                  | C16954942 | -12.29 | -3.3  | -16.07 | 8.88  | -1.79 |
| 5534 | CC(=O)OC/C=C/Cl                                 | C17311824 | -12.29 | -1.28 | -12.46 | 4.59  | -3.13 |
| 5535 | c1ccc(cc1)CNC(=S)NN)F                           | C20426753 | -12.29 | 1.66  | -21.89 | 10.74 | -2.8  |
| 5536 | #CCc1cc(ccc1F)N                                 | C21984820 | -12.29 | 0.45  | -16.47 | 6.42  | -2.7  |
| 5537 | #CCCN1CCCC1=O                                   | C21993361 | -12.29 | 0.27  | -16.95 | 7.24  | -2.85 |
| 5538 | c1cnn(c1)C[C@H]2CO2                             | C22215419 | -12.29 | -2.76 | -14.27 | 6.03  | -1.29 |
| 5539 | COc1cncnc1N                                     | C26440874 | -12.29 | -1.44 | -15.68 | 5.85  | -1.02 |
| 5540 | CC(C)COC(=O)Cl                                  | C00388452 | -12.28 | 1.16  | -11.84 | 1.65  | -3.24 |
| 5541 | c1ccc(cc1)CCC(=O)N)O                            | C01433352 | -12.28 | -2.33 | -16.81 | 6.67  | 0.19  |
| 5542 | CC(=O)OCCBr                                     | C01566591 | -12.28 | 0.36  | -14    | 4.29  | -2.93 |
| 5543 | c1c[nH]c2c1ncnc2N                               | C01575342 | -12.28 | -3.02 | -16.19 | 8.08  | -1.15 |
| 5544 | COCC(=O)Cl                                      | C01631211 | -12.28 | -1.56 | -13.51 | 4.36  | -1.57 |
| 5545 | Cc1nccnc1)Cl                                    | C01644965 | -12.28 | -2.36 | -11.33 | 3.72  | -2.3  |
| 5546 | C(CC=O)CCl                                      | C01681994 | -12.28 | -0.98 | -13.34 | 4.53  | -2.49 |
| 5547 | CC(=O)OCCl                                      | C01845923 | -12.28 | -1.35 | -13.99 | 4.38  | -1.31 |
| 5548 | CCCC#CC#N                                       | C01873910 | -12.28 | -0.29 | -12.8  | 3.52  | -2.71 |
| 5549 | COC(=O)CCC(F)(F)F                               | C02525281 | -12.28 | -0.18 | -12.54 | 3.48  | -3.04 |
| 5550 | c1c(cc(c1F)F)F)CC#N                             | C02575057 | -12.28 | -2.41 | -15.49 | 9.45  | -3.83 |
| 5551 | c1cc(n(c1)CCC#N)C=O                             | C02577970 | -12.28 | -2.19 | -16.09 | 9.83  | -3.83 |
| 5552 | CNC(=S)Nc1ncco1                                 | C05566430 | -12.28 | -1.47 | -16.8  | 5.55  | 0.44  |
| 5553 | CCc1csc(n1)[S-]                                 | C05599578 | -12.28 | -1.55 | -14.62 | 3.18  | 0.7   |
| 5554 | C=C/C=C/CCC(=O)C=[N+]=[N-]                      | C05665619 | -12.28 | 0.32  | -16.32 | 6.04  | -2.33 |
| 5555 | Cc1c(=O)[nH]c(=O)[nH]n1                         | C11666592 | -12.28 | -1.14 | -18.58 | 5.83  | 1.61  |
| 5556 | C1CC1([NH+])=c <sub>2</sub> /c(c(c2=O)[O-])[O-] | C15768417 | -12.28 | -1.41 | -16.8  | 5.02  | 0.91  |
| 5557 | c1cnc(nH)c1=O                                   | C18081263 | -12.28 | -3.77 | -15.81 | 8.27  | -0.96 |
| 5558 | C1CCC(C1)CCC=O                                  | C19089807 | -12.28 | -1.75 | -10.4  | 3.84  | -3.97 |
| 5559 | CCC(=O)c1cncn1C                                 | C19091708 | -12.28 | 0.05  | -13.15 | 4.02  | -3.18 |
| 5560 | c1cnc(nc1)NO                                    | C26441007 | -12.28 | -3.11 | -17.23 | 8.75  | -0.7  |
| 5561 | c1cc(ccc1CCO)O                                  | C00164581 | -12.27 | -1.83 | -14.32 | 3.68  | 0.2   |
| 5562 | Cc1ccc(o1)C=O                                   | C00900814 | -12.27 | -1.85 | -15.17 | 7.52  | -2.76 |
| 5563 | c1c(=O)[nH]c(nc1Cl)[O-]                         | C01494932 | -12.27 | -1.39 | -16.95 | 5.34  | 0.73  |
| 5564 | c1c2c(nc(n1)N)SCC2                              | C01703705 | -12.27 | 1     | -17.02 | 6.37  | -2.62 |
| 5565 | c1cc(c(c1)F)C#N)O                               | C02586041 | -12.27 | 0.25  | -18.09 | 7.06  | -1.49 |
| 5566 | c1csc2c1c(=O)[nH]cn2                            | C04023433 | -12.27 | -2.61 | -17.21 | 9.65  | -2.1  |
| 5567 | c1csc(n1)NCCO                                   | C13539253 | -12.27 | -3.61 | -14.12 | 5.03  | 0.43  |
| 5568 | Cn1c(c(sc1=S)C#N)N                              | C13547304 | -12.27 | -3.7  | -14.05 | 7.93  | -2.46 |
| 5569 | CCC/C(=N/O)/N                                   | C15020970 | -12.27 | -2.72 | -13.8  | 4.04  | 0.21  |
| 5570 | CCOC(=O)[C@H]1[C@H]1F                           | C15442312 | -12.27 | -1.49 | -13.56 | 6.28  | -3.51 |
| 5571 | C=C(Cc1ccccc1)C=O                               | C21998734 | -12.27 | 0.12  | -13.7  | 5.93  | -4.63 |
| 5572 | C=Cn1cnc1C(=O)C(F)(F)F                          | C32620402 | -12.27 | 1.23  | -14.37 | 4.9   | -4.04 |
| 5573 | Cc1ccsc1C=O                                     | C00157152 | -12.26 | 0.73  | -15.24 | 5.14  | -2.9  |
| 5574 | c1c(c(=O)[nH]c(=O)[nH]1)N                       | C01236370 | -12.26 | -3.72 | -19.08 | 7.96  | 2.58  |
| 5575 | C1CC=C[C@H](C1)c2nc(nc(n2)N)N                   | C01673374 | -12.26 | -0.11 | -13.06 | 5.02  | -4.11 |
| 5576 | CCC(=O)Oc1ccccc1                                | C01694849 | -12.26 | -0.82 | -11.76 | 5.26  | -4.95 |

|      |                                  |           |        |       |        |       |       |
|------|----------------------------------|-----------|--------|-------|--------|-------|-------|
| 5577 | CSCCC=O                          | C01733699 | -12.26 | -1.29 | -13.41 | 4.8   | -2.36 |
| 5578 | COC(=O)CSCCCI                    | C01737053 | -12.26 | -0.58 | -12.75 | 4.75  | -3.68 |
| 5579 | CCCSC                            | C02038334 | -12.26 | -0.37 | -10.01 | 1.21  | -3.08 |
| 5580 | COCCNC(=O)C(F)F                  | C03165342 | -12.26 | -0.34 | -15.78 | 4.01  | -0.15 |
| 5581 | C/C(=C/C(=O)OC)/OC(=O)C          | C04583015 | -12.26 | -0.36 | -14.92 | 5.92  | -2.9  |
| 5582 | C(#N)[C@H](F)                    | C08698381 | -12.26 | -0.15 | -12.92 | 3.17  | -2.36 |
| 5583 | CC(=N/N=C([NH-])/N[N+](=O)[O-])C | C13136442 | -12.26 | -0.91 | -15.23 | 6.87  | -2.99 |
| 5584 | C/C=C/C1OCCO1                    | C16970435 | -12.26 | 0.24  | -13.56 | 2.85  | -1.79 |
| 5585 | Cc1ccc(nn1)Br                    | C19872637 | -12.26 | -1.54 | -13.9  | 5.42  | -2.24 |
| 5586 | Cn1nc(nn1)[N-][N+](=O)[O-]       | C20428581 | -12.26 | 0.02  | -17.98 | 7.92  | -2.22 |
| 5587 | CC(=O)c1ccncc1                   | C01555299 | -12.25 | -2.53 | -12.71 | 5.34  | -2.36 |
| 5588 | c1cc(sc1Br)Br                    | C01673411 | -12.25 | -0.84 | -13.07 | 0.69  | 0.96  |
| 5589 | c1cc2c(cc1F)[nH]c(=O)o2          | C01728885 | -12.25 | -1.51 | -15.76 | 5.33  | -0.31 |
| 5590 | COC(=N)C(F)F                     | C04897098 | -12.25 | -1.98 | -13.1  | 2.11  | 0.71  |
| 5591 | c1cc(c(cc1F)F)C/C(=N/O)/N        | C06453297 | -12.25 | -1.61 | -17.22 | 6.29  | 0.29  |
| 5592 | c1c(c([nH]c(=S)n1)[O-])Cl        | C06565555 | -12.25 | -4.61 | -15.82 | 9.73  | -1.55 |
| 5593 | CCC(=O)Cc1c[nH]nc1               | C12359063 | -12.25 | -1.73 | -15.54 | 7.07  | -2.05 |
| 5594 | CS/C(=NIC#N)/S                   | C12405130 | -12.25 | -1.84 | -12.23 | 5.38  | -3.57 |
| 5595 | CCc1[nH]c(nn1)[S-]               | C14128798 | -12.25 | -2.96 | -15.21 | 8.39  | -2.47 |
| 5596 | C1C(=NNC1=O)N                    | C18145753 | -12.25 | -6.06 | -15.21 | 5.43  | 3.6   |
| 5597 | c1c(c(nc1Br)F)N                  | C19800981 | -12.25 | -0.56 | -14.63 | 3.94  | -0.99 |
| 5598 | c1cc(ncn1)S(=O)(=O)N=[N+]=[N-]   | C32602802 | -12.25 | 1.29  | -20.74 | 5.55  | 1.65  |
| 5599 | c1cc(c(c1)F)c2nccn2)N            | C00159344 | -12.24 | -1.07 | -17.69 | 7.88  | -1.35 |
| 5600 | c1cc(ncc1CC#N)Cl                 | C01387124 | -12.24 | -2.91 | -14.77 | 8.73  | -3.28 |
| 5601 | CC(=C)CC#N                       | C01635623 | -12.24 | -1.19 | -12.81 | 4.29  | -2.53 |
| 5602 | CC(=C)C(=O)OC                    | C01680392 | -12.24 | -1.95 | -11.79 | 3.96  | -2.46 |
| 5603 | CCOCCI                           | C02031622 | -12.24 | -0.8  | -11.61 | 2.31  | -2.14 |
| 5604 | c1nc(c(c(n1)N)NC=O)N             | C02558610 | -12.24 | -2.97 | -19.19 | 8.96  | 0.98  |
| 5605 | COC(=O)C(C(F)F)F(F)F             | C02565738 | -12.24 | 1.52  | -13.48 | 4.34  | -4.61 |
| 5606 | c1(=O)c(=S)[nH]nc([nH]1)[O-]     | C03954265 | -12.24 | -5.36 | -18.83 | 7.25  | 4.7   |
| 5607 | Cc1cc(nn1)[O-]                   | C05296681 | -12.24 | -1.66 | -14.66 | 6.24  | -2.16 |
| 5608 | C/C(=C1/CCCCC1=O)/[O-]           | C18037976 | -12.24 | -4.11 | -9.94  | 4.22  | -2.41 |
| 5609 | COc1ccc(cn1)N=C=S                | C19840574 | -12.24 | -0.13 | -13.66 | 3.07  | -1.52 |
| 5610 | c1cc(ccc1F)SCC(=NH2+)N           | C19848161 | -12.24 | 1.18  | -19.41 | 8.36  | -2.38 |
| 5611 | c1c(c(cc1Cl)F)Br)N               | C21300420 | -12.24 | -4.17 | -8.46  | 3.03  | -2.64 |
| 5612 | C1CC=C(OC1)C#N                   | C26897037 | -12.24 | 0.83  | -14.84 | 4.15  | -2.38 |
| 5613 | CC(=O)Nc1ccc(cc1)F               | C00145421 | -12.23 | -1.05 | -15.21 | 6.75  | -2.72 |
| 5614 | c1cc(c2nccnn2c1)N                | C01385374 | -12.23 | -2.63 | -14.72 | 7.26  | -2.14 |
| 5615 | c1cc2nccnn2cc1N                  | C01597529 | -12.23 | -4.42 | -18.47 | 10.86 | -0.19 |
| 5616 | C/C=C(C)C#N                      | C01676639 | -12.23 | -1.46 | -11.85 | 3.96  | -2.88 |
| 5617 | c1c(cc1F)F)N+](=O)[O-]           | C01706151 | -12.23 | -0.15 | -12.4  | 2.69  | -2.38 |
| 5618 | CN(C)C(=O)Cl                     | C01712063 | -12.23 | -1.01 | -14.29 | 4.14  | -1.07 |
| 5619 | CC(=C1C=CC=C1)C                  | C01719654 | -12.23 | -0.01 | -10.34 | 2.52  | -4.4  |
| 5620 | CCC(=O)c1nccs1                   | C02020149 | -12.23 | 0.83  | -14.78 | 4.06  | -2.34 |
| 5621 | C/C=C/CC#N                       | C02037705 | -12.23 | -1.06 | -12.76 | 4.6   | -3.01 |
| 5622 | c1cocc1C=O                       | C02040441 | -12.23 | -1.87 | -15.67 | 6.98  | -1.66 |
| 5623 | Cc1cc(ccn1)Cl                    | C02391146 | -12.23 | -1.68 | -9.95  | 2.35  | -2.95 |
| 5624 | c1c(sc1)CO                       | C02527712 | -12.23 | -1.64 | -16.42 | 5.09  | 0.74  |
| 5625 | Cn1c(cen1)C(=O)Cl                | C02549378 | -12.23 | 1.12  | -15.27 | 3.57  | -1.65 |
| 5626 | CC(=O)OCC(F)F                    | C02557127 | -12.23 | -0.02 | -13.33 | 3.82  | -2.7  |
| 5627 | c1c[nH]cc1C=O                    | C02581109 | -12.23 | -3.04 | -15.64 | 8.09  | -1.64 |
| 5628 | C(CS)CS                          | C03860693 | -12.23 | -0.07 | -11.36 | 1.68  | -2.49 |
| 5629 | C([C@H](C(F)F)F)O)Br             | C04242156 | -12.23 | -1.01 | -13    | 2.45  | -0.66 |
| 5630 | c1[nH]c(c(n1)C(=O)N)F            | C04771527 | -12.23 | -4.52 | -17.79 | 9.24  | 0.85  |
| 5631 | CCS/C(=[NH+]/N)/N                | C06411412 | -12.23 | -3.68 | -14.71 | 2.82  | 3.34  |
| 5632 | C[C@H](C(=O)OC)F                 | C06491528 | -12.23 | -0.6  | -13.46 | 4.03  | -2.21 |
| 5633 | C/C=C/Cc1ccc(cc1)O               | C08614342 | -12.23 | -0.47 | -14.44 | 2.76  | -0.08 |
| 5634 | C1C[C@H](OC1)C(=O)Cl             | C11731532 | -12.23 | 1.9   | -15.93 | 4.25  | -2.44 |
| 5635 | c1c(cnc1O)Cl                     | C12359952 | -12.23 | -1.12 | -18.22 | 4.86  | 2.24  |
| 5636 | c1cc(ccc1C(=O)C(=N/N)F           | C16400651 | -12.23 | 3.3   | -20.95 | 7.4   | -1.98 |
| 5637 | CC([NH+]=C(N))SCC                | C16911655 | -12.23 | -1.41 | -11.21 | 2.47  | -2.08 |
| 5638 | c1cc(ccc1F)NCC(F)F               | C20051071 | -12.23 | -3.06 | -8.95  | 3.42  | -3.64 |
| 5639 | c1c[nH+]c(c1Br)O)N               | C21981839 | -12.23 | -4.38 | -12    | 3.87  | 0.29  |
| 5640 | c1cccc(c1)n2cnnn2)O              | C31772037 | -12.23 | -1.35 | -17.08 | 8.03  | -1.84 |
| 5641 | Cc1cnc1C                         | C00003182 | -12.22 | -1.74 | -12.62 | 3.9   | -1.75 |
| 5642 | COC1=CC(=O)CC1                   | C00395539 | -12.22 | -2.07 | -14.47 | 6.29  | -1.96 |
| 5643 | Cc1ccc(cc1)OC(=S)Cl              | C00395624 | -12.22 | 0.77  | -15.03 | 2.28  | -0.23 |
| 5644 | CCCC(=O)SC                       | C00409240 | -12.22 | -0.45 | -13.38 | 2.41  | -0.81 |
| 5645 | CSccncc1n)N                      | C01675981 | -12.22 | -2.09 | -15.65 | 3.86  | 1.66  |
| 5646 | c1nc(c(n1)N)C(=O)N               | C01699717 | -12.22 | -1.61 | -18.17 | 4.72  | 2.83  |
| 5647 | c1c(sc1)Br)Br                    | C01756180 | -12.22 | -0.94 | -14.05 | 1.26  | 1.51  |
| 5648 | C(#N)C(C(F)F)F                   | C01847433 | -12.22 | 0.62  | -11.67 | 1.2   | -2.36 |
| 5649 | c1(c(nc2c(n1)non2)NN)N           | C02360407 | -12.22 | -9.59 | -14.67 | 11.72 | 0.33  |
| 5650 | C[C@H](C(=O)C)S                  | C04802667 | -12.22 | -1.22 | -11.9  | 2.95  | -2.04 |
| 5651 | CC(=C)CNC(=S)N                   | C05601328 | -12.22 | -1.34 | -16.13 | 2.48  | 2.77  |
| 5652 | CO[C@H]1CN=C1                    | C06403193 | -12.22 | -2.38 | -15.35 | 3.51  | 2.01  |
| 5653 | CC(=O)[C@H]1C(=O)COC1=O          | C06562806 | -12.22 | -3.26 | -17.72 | 9.02  | -0.26 |
| 5654 | C=CCOC1cccc1                     | C08294968 | -12.22 | 1.63  | -15.19 | 3.67  | -2.32 |
| 5655 | c1c(c(n1)CCO)Br                  | C12357746 | -12.22 | -3.04 | -12.64 | 3.85  | -0.39 |
| 5656 | c1cnn(c1N)CC(F)F                 | C12396453 | -12.22 | 0.89  | -15.48 | 4.15  | -1.77 |
| 5657 | COCc1ccncc1                      | C15858171 | -12.22 | 0.24  | -13.44 | 3.3   | -2.31 |
| 5658 | C/C=C/C(=O)OC(C)C                | C16892842 | -12.22 | 0.43  | -12.3  | 3.53  | -3.87 |
| 5659 | c1c(cc1c1F)F)NC(=O)N             | C19260055 | -12.22 | -4.8  | -16.52 | 9.59  | -0.5  |
| 5660 | C1CCC(C1)OCC#N                   | C19486556 | -12.22 | -0.47 | -14.11 | 5.45  | -3.08 |
| 5661 | c1ncc(n1)CC(C(=N/O)/N            | C19503104 | -12.22 | -3.36 | -16.75 | 8.61  | -0.72 |
| 5662 | C1CCc2c(c([nH]2)C=O)C1           | C20270533 | -12.22 | 0.37  | -15.53 | 4.67  | -1.74 |
| 5663 | Cc1ccc(c1)F)NC(=O)N              | C20372350 | -12.22 | -1.48 | -18.15 | 8.25  | -0.85 |
| 5664 | [H]N=C/C1C(=CCS1)C(=O)NC         | C26422384 | -12.22 | -2.99 | -15.42 | 6.13  | 0.06  |
| 5665 | COC(=O)C1cn[nH]n1                | C26507098 | -12.22 | -0.48 | -19.56 | 8.52  | -0.71 |
| 5666 | COC(=O)c1ccsc1N                  | C00115816 | -12.21 | -3.04 | -11.91 | 4.42  | -1.67 |

|      |                                      |           |        |       |        |       |       |
|------|--------------------------------------|-----------|--------|-------|--------|-------|-------|
| 5667 | c1c(c(co1)C=O)CO                     | C00332260 | -12.21 | -5.08 | -13.01 | 5.58  | 0.3   |
| 5668 | c1nncn1)CCO                          | C01557213 | -12.21 | -2.75 | -18.2  | 6.83  | 1.91  |
| 5669 | C[C@@H]1C[C@H]1C(=O)Cl               | C01766063 | -12.21 | -1.05 | -12.68 | 2.41  | -0.89 |
| 5670 | CCC(=O)OC(C)C                        | C02031573 | -12.21 | -1.51 | -10.85 | 3.61  | -3.46 |
| 5671 | CC/[NH+]=C/c1ccccc1                  | C03083158 | -12.21 | -0.99 | -14.06 | 2.71  | 0.13  |
| 5672 | CCOC(=O)CSC(=[NH2+])N                | C05315506 | -12.21 | -1.58 | -15.35 | 3.62  | 1.09  |
| 5673 | c1c(ncnc1)Cl                         | C06643288 | -12.21 | -0.34 | -9.81  | 1.22  | -3.29 |
| 5674 | c1ncnc2c1C(=O)OC2=O                  | C08100888 | -12.21 | -3.01 | -12.05 | 5.62  | -2.77 |
| 5675 | Cc1cc(c[nH]c1=O)Br                   | C08698070 | -12.21 | -3.96 | -12.99 | 6.75  | -2.02 |
| 5676 | CC/C=C/C#N                           | C13525896 | -12.21 | -0.78 | -13.33 | 4.79  | -2.88 |
| 5677 | C(C(OC(F)(F)F)(F)F)F                 | C14611416 | -12.21 | -1.79 | -11.76 | 2.74  | -1.41 |
| 5678 | c1ccnc(c1)C(=O)C(F)F                 | C16159011 | -12.21 | -1.55 | -12.87 | 5.11  | -2.9  |
| 5679 | C[C@H]1C=CCC1=O                      | C18208228 | -12.21 | -1.33 | -13.42 | 5.28  | -2.74 |
| 5680 | Cc1cnc(s1)Br                         | C19046001 | -12.21 | -0.39 | -12.42 | 3.02  | -2.43 |
| 5681 | C1CSC[C@H]1S                         | C20476695 | -12.21 | 0.34  | -11.6  | 2     | -2.96 |
| 5682 | c1c(ncn1)C(F)(F)F                    | C26440929 | -12.21 | -3.48 | -16.4  | 8.32  | -0.65 |
| 5683 | c1c(nc(o1)Br)CO                      | C30678074 | -12.21 | -2.98 | -16.07 | 4.78  | 2.06  |
| 5684 | c1cc2c(cc1O)OCO2                     | C00164504 | -12.2  | -0.76 | -15.84 | 4.62  | -0.21 |
| 5685 | CC(=O)CCCl                           | C01664673 | -12.2  | 0.63  | -13.82 | 3.59  | -2.6  |
| 5686 | COCCc1ccccn1                         | C01666110 | -12.2  | 0.33  | -13.53 | 3.53  | -2.52 |
| 5687 | C=C(COC(=S)S)Cl                      | C01681477 | -12.2  | -1.2  | -12.76 | 4.5   | -2.75 |
| 5688 | Cn1c(=O)[nH]c(=O)cn1                 | C01684202 | -12.2  | -1.44 | -17.6  | 5.8   | 1.03  |
| 5689 | COC(=O)C(C(OC)(F)F)(F)F              | C01845749 | -12.2  | 1.88  | -14.45 | 3.3   | -2.94 |
| 5690 | C(CN=C=S)CCl                         | C02390117 | -12.2  | -0.97 | -14.55 | 2.37  | 0.96  |
| 5691 | COc1ccc(c(c1)F)O                     | C02545252 | -12.2  | -2.02 | -13.41 | 3.94  | -0.71 |
| 5692 | C=C(c1ccccc1)NNC=O                   | C03250356 | -12.2  | 2     | -19.51 | 6.59  | -1.28 |
| 5693 | c1cc(c(nc1)[N+]=[O])N                | C04085943 | -12.2  | -2.36 | -18.66 | 10.65 | -1.84 |
| 5694 | CNC(=O)Nc1ccncc1                     | C06378866 | -12.2  | 0.29  | -19.47 | 7.36  | -0.38 |
| 5695 | c1c(ncnc1N)C(F)F                     | C08764206 | -12.2  | -3.85 | -10.81 | 4.18  | -1.72 |
| 5696 | c1(c(non1)/N=[N+]/(c2c(non2)N)[O-])N | C12428225 | -12.2  | -3.54 | -16.14 | 7.62  | -0.14 |
| 5697 | c1c[nH]ccc1=O                        | C13515858 | -12.2  | -1.61 | -15.59 | 6.5   | -1.51 |
| 5698 | c1c(c(sc1Br)C#N)N                    | C16696880 | -12.2  | -3.06 | -10.62 | 3.34  | -1.86 |
| 5699 | CCn1ccncc1C=O                        | C16902428 | -12.2  | -1.87 | -12.73 | 5.11  | -2.71 |
| 5700 | c1cc(c(cc1F)NC(=O)N)F                | C19279583 | -12.2  | -4.22 | -16.15 | 8.75  | -0.59 |
| 5701 | C#CCNCC(F)F                          | C20033242 | -12.2  | 0.14  | -14.28 | 3.38  | -1.44 |
| 5702 | c1cc(c(cc1F)NC(=O)N)F                | C21302798 | -12.2  | -2.56 | -13.93 | 3.43  | 0.85  |
| 5703 | c1ccc(cc1)C(=O)CC#N                  | C01555580 | -12.19 | -2.1  | -11.84 | 6.5   | -4.75 |
| 5704 | CC(=O)O[C@H]1CC(=O)C=C1              | C01591482 | -12.19 | 1.49  | -17.88 | 5.78  | -1.57 |
| 5705 | Cc1c(c(no1)N)Br                      | C02510208 | -12.19 | -2.28 | -11.82 | 3.58  | -1.66 |
| 5706 | [H]N=C(\C(C(C(F)(F)F)(F)F)(F)F)[O-]  | C04348144 | -12.19 | -3.5  | -12.17 | 3.71  | -0.24 |
| 5707 | CC1=C[C@H](CCC1)O                    | C04528633 | -12.19 | -0.9  | -11.85 | 1.99  | -1.43 |
| 5708 | C1CC=CSC1                            | C05217520 | -12.19 | -0.5  | -12.91 | 1.51  | -0.29 |
| 5709 | C1C[C@@H](OC1)Cl                     | C05600268 | -12.19 | 1.39  | -12.71 | 2.01  | -2.87 |
| 5710 | CC[C@H]1CCCCO1                       | C05719152 | -12.19 | 0.29  | -13.34 | 1.15  | -0.29 |
| 5711 | c1[nH]c(=O)c(c(n1)N)N                | C09144851 | -12.19 | -6.86 | -14.77 | 5.79  | 3.66  |
| 5712 | Cc1cc(c(nc1)F)Cl                     | C16159754 | -12.19 | -1.66 | -11.62 | 4.01  | -2.91 |
| 5713 | C=C(CC#N)Cl                          | C19479444 | -12.19 | -0.46 | -14.47 | 5.56  | -2.82 |
| 5714 | C=CCNCC(F)F                          | C20033533 | -12.19 | -0.77 | -11.57 | 1.84  | -1.69 |
| 5715 | C=CCNCC(=C)Br                        | C21953591 | -12.19 | -0.63 | -10.32 | 1.02  | -2.25 |
| 5716 | C1CC(=C[C@H]1O)Br                    | C21994686 | -12.19 | -0.21 | -14.04 | 2.96  | -0.91 |
| 5717 | c1ccc1/C=C/C=O                       | C25722042 | -12.19 | -3.31 | -12.67 | 6.44  | -2.66 |
| 5718 | Cc1c(ncnc1)C(F)F                     | C26512550 | -12.19 | -2.63 | -15.4  | 6.17  | -0.34 |
| 5719 | C=CCOC(=O)[C@H](C=C)O                | C01598480 | -12.18 | -1.9  | -12.24 | 3.86  | -1.89 |
| 5720 | Cc1ccc(cc1)N=C                       | C01628277 | -12.18 | -2.01 | -12.95 | 3.88  | -1.11 |
| 5721 | CO/C=C/C#C                           | C01692444 | -12.18 | -1.88 | -11.16 | 3.01  | -2.15 |
| 5722 | COC(=O)C(=O)N                        | C01707270 | -12.18 | -2.92 | -14.67 | 4.96  | 0.46  |
| 5723 | c1(c(nc[nH]1)Cl)Cl                   | C01756167 | -12.18 | -2.86 | -12.85 | 2.66  | 0.87  |
| 5724 | CCC(=O)ONO                           | C01763327 | -12.18 | -2.69 | -14.37 | 5.62  | -0.75 |
| 5725 | c1(c(sc(n1)F)Cl)C(F)F                | C02540189 | -12.18 | -1.81 | -10.21 | 2.32  | -2.48 |
| 5726 | CCOC1=CCCCC1                         | C04428694 | -12.18 | -0.88 | -11.96 | 1.53  | -0.87 |
| 5727 | Cn1cc(cn1)C(=O)Cl                    | C04519971 | -12.18 | 0.7   | -15.87 | 5.04  | -2.05 |
| 5728 | C/(C(=C)Cl)Cl)SC#N                   | C05941607 | -12.18 | -0.56 | -12.57 | 2.84  | -1.89 |
| 5729 | C1C[C@@H](C[C@H]1)SC#N)O             | C05975913 | -12.18 | -0.09 | -14.73 | 4.06  | -1.43 |
| 5730 | C[C@H](c1nc(c1)C(=O)N)O              | C06933237 | -12.18 | -4.81 | -16.43 | 6.45  | 2.61  |
| 5731 | CCc1nnc(s1)Br                        | C11920181 | -12.18 | -1.87 | -12.24 | 4.17  | -2.24 |
| 5732 | C1C=C2[C@H](C1=O)C=C2=O              | C15022466 | -12.18 | -1.92 | -12.63 | 5.2   | -2.82 |
| 5733 | C=C[C@H](C=C)O                       | C18088144 | -12.18 | -1.24 | -14.42 | 2.41  | 1.07  |
| 5734 | c1cc(ccc1c2cc[nH]n2)F                | C18217709 | -12.18 | -0.7  | -13.09 | 4.93  | -3.33 |
| 5735 | c1ccc(c(c1)[C@H]2CO2)F               | C19730664 | -12.18 | -0.94 | -11.64 | 3.16  | -2.76 |
| 5736 | C/(C=C/C)Cl)O                        | C33359474 | -12.18 | -1.37 | -13.97 | 3.71  | -0.56 |
| 5737 | c1cnc(cc1Cl)C#N                      | C00065282 | -12.17 | 0.72  | -14.61 | 4.39  | -2.67 |
| 5738 | c1cc2c(cc[nH]2)cc1N                  | C00153906 | -12.17 | -1.95 | -13.02 | 4.49  | -1.69 |
| 5739 | c1c(c(ncn1)NN)Cl                     | C00967357 | -12.17 | -4.42 | -9.73  | 3.46  | -1.47 |
| 5740 | c1cnc2nncn2c1                        | C01601189 | -12.17 | -4.39 | -18.71 | 12.5  | -1.57 |
| 5741 | c1cc2c(cc1O)cc(=O)[nH]2              | C01608403 | -12.17 | -4.39 | -15.73 | 7.35  | 0.6   |
| 5742 | c1c(c(cs1)Br)Br                      | C01653761 | -12.17 | -1.31 | -9.44  | 1.95  | -3.38 |
| 5743 | C1CCN(C1)C#N                         | C01676633 | -12.17 | 1.41  | -13.14 | 4.03  | -4.47 |
| 5744 | C[C@H]1(CCC=C1)O                     | C01713309 | -12.17 | -1.2  | -11.88 | 1.91  | -1    |
| 5745 | COC(=O)[C@H](C(F)F)F                 | C01847475 | -12.17 | -0.59 | -13.3  | 4.33  | -2.61 |
| 5746 | c1ccc(cc1)C(c2n[nH]c(=O)n2)N         | C01857157 | -12.17 | -1.99 | -15.1  | 7.32  | -2.4  |
| 5747 | C1(=O)C(=O)NC(=O)C(=O)N1             | C01870442 | -12.17 | 1.07  | -20.84 | 5.91  | 1.68  |
| 5748 | c1c(csc1Br)Br                        | C02168779 | -12.17 | -0.55 | -13.53 | 1.03  | 0.88  |
| 5749 | C(CCl)N=C=S                          | C02390110 | -12.17 | 0.25  | -14.53 | 1.2   | 0.91  |
| 5750 | Cn1ccc(n1)C#N                        | C02565746 | -12.17 | -0.29 | -16.84 | 6.91  | -1.95 |
| 5751 | C1=CC(=NO)C=CC1=NO                   | C03875735 | -12.17 | -5.34 | -15.34 | 7.09  | 1.42  |
| 5752 | C(=NC(=O)Cl)=O                       | C04528639 | -12.17 | -0.01 | -15.1  | 1.55  | 1.39  |
| 5753 | c1c(c([nH]1)Br)Br                    | C04552403 | -12.17 | -0.58 | -12.9  | 2.83  | -1.52 |
| 5754 | c1[nH]c(c(n1)C(=O)N)SC#N             | C05605533 | -12.17 | -6.66 | -13.69 | 7.98  | 0.21  |
| 5755 | CC[C@@H](C)N(=O)O                    | C06001708 | -12.17 | -2.51 | -12.09 | 2.99  | -0.56 |
| 5756 | c1c(c(c(n1)[O-])Cl)Cl                | C08612671 | -12.17 | -0.57 | -15.73 | 4.86  | -0.73 |





|      |                                      |           |        |       |        |       |       |
|------|--------------------------------------|-----------|--------|-------|--------|-------|-------|
| 5847 | CC(=O)c1csc(n1)N                     | C03888881 | -12.12 | -2.28 | -13.79 | 5     | -1.05 |
| 5848 | Cn1c(=O)[nH]c(=O)c(n1)[S-]           | C05893136 | -12.12 | -0.86 | -16.47 | 4.21  | 0.99  |
| 5849 | c1cc(oc1)Cn2c(cc(=O)[nH]c2=O)[O-]    | C06059073 | -12.12 | -2.76 | -20.28 | 9.35  | 1.57  |
| 5850 | c1cc2c(cc1F)sc(n2)N                  | C17744334 | -12.12 | -1.9  | -12.35 | 4.57  | -2.44 |
| 5851 | Cc1cc([nH]c1=O)Cl                    | C20358050 | -12.12 | -3.99 | -16.79 | 9.84  | -1.18 |
| 5852 | C1[C@@@H](OC1)N=C=S                  | C26475813 | -12.12 | 1.09  | -15.16 | 2.55  | -0.6  |
| 5853 | c1cc2c(cc1F)no[n+][2][O-]            | C00236905 | -12.11 | -3.13 | -13.89 | 8.44  | -3.53 |
| 5854 | Cc1c2cccoc2[nH]n1                    | C00337341 | -12.11 | -3.77 | -12.7  | 7.19  | -2.84 |
| 5855 | CCOC(=O)CC=C                         | C00389875 | -12.11 | -1.11 | -12.04 | 3.73  | -2.69 |
| 5856 | c1cc(ccc1NC(=O)N)Br                  | C00394369 | -12.11 | -2.16 | -16.08 | 6.85  | -0.72 |
| 5857 | CCCC(=O)OC=C                         | C00404766 | -12.11 | 2.42  | -14.45 | 3.46  | -3.54 |
| 5858 | c1cc(ncc1C(=O)N)F                    | C01600208 | -12.11 | -2.9  | -16.02 | 6.42  | 0.38  |
| 5859 | c1c(cc(c(c1O)C=O)O)O                 | C01670802 | -12.11 | -4.13 | -17.51 | 7.46  | 2.08  |
| 5860 | CCOC(C)C                             | C02031650 | -12.11 | -0.36 | -10.73 | 1.24  | -2.25 |
| 5861 | c1cc(sc1)C(=O)CC#N                   | C02170146 | -12.11 | -1.83 | -14.72 | 6.13  | -1.68 |
| 5862 | c1cc(cc(c1C(F)F)F)F                  | C02382347 | -12.11 | -2.27 | -11.21 | 2.85  | -1.48 |
| 5863 | c1(c(nc(s1)F)Cl)C(F)F                | C02540173 | -12.11 | -2.19 | -12.06 | 3.38  | -1.23 |
| 5864 | [C@](C(F)(F)Cl)(N=O)(F)Cl            | C05049403 | -12.11 | -2.34 | -11.8  | 2.4   | -0.37 |
| 5865 | Cn1c(nnc1[S-])C(F)F                  | C06072296 | -12.11 | -0.28 | -14.02 | 5.08  | -2.89 |
| 5866 | Cn1c(=S)[nH]c(n1)N                   | C15022151 | -12.11 | -1.6  | -13.95 | 5.3   | -1.86 |
| 5867 | c1cc(cc(c1OCC#N)F)F                  | C15442724 | -12.11 | -3.21 | -14.5  | 9.1   | -3.51 |
| 5868 | C/C=C/C1C(=O)NC(=S)S1                | C16892172 | -12.11 | -0.6  | -15.26 | 5.85  | -2.1  |
| 5869 | c1[nH]c2c(n1)nnnc2[O-]               | C17284041 | -12.11 | -5.3  | -19.3  | 10.16 | 2.34  |
| 5870 | c1[nH]c2c(n1)c(=O)[nH]cn2            | C18153302 | -12.11 | -6.93 | -16.56 | 10.59 | 0.79  |
| 5871 | c1cnccc1CNC(=S)NN                    | C26516090 | -12.11 | -0.68 | -21    | 10.94 | -1.39 |
| 5872 | c1c([nH]c1Cl)CO                      | C26898271 | -12.11 | -2.77 | -15.43 | 5.24  | 0.85  |
| 5873 | C[S@@]([O-])Cc1ccccc1                | C00013561 | -12.1  | -4.15 | -15.05 | 9.93  | -2.83 |
| 5874 | c1cc(c(c1)O)O)O                      | C00330141 | -12.1  | -3.24 | -16.04 | 5.31  | 1.87  |
| 5875 | Cc1ccc(cc1)NC(=O)OC                  | C00395484 | -12.1  | -0.54 | -16.69 | 5.46  | -0.32 |
| 5876 | C/C=C/Cl)O                           | C01530491 | -12.1  | -2.75 | -12.96 | 2.66  | 0.95  |
| 5877 | CCOC=C                               | C01586657 | -12.1  | -0.48 | -11.82 | 1.88  | -1.68 |
| 5878 | C[C@]([H])(C(=O)OC)Cl                | C01696573 | -12.1  | 0.27  | -13.17 | 3.46  | -2.65 |
| 5879 | C=C(C(=O)OCC(F)F)C(F)F               | C02529929 | -12.1  | -0.95 | -12.13 | 4.97  | -3.99 |
| 5880 | COCC(C(F)F)F                         | C02560088 | -12.1  | -0.67 | -11.72 | 2.33  | -2.04 |
| 5881 | c1cc(ccc1NC#N)Cl                     | C02577553 | -12.1  | -5.94 | -5.16  | 4.24  | -5.24 |
| 5882 | Cc1cnc(s1)CC#N                       | C03348992 | -12.1  | -2.15 | -14.11 | 7.07  | -2.9  |
| 5883 | c1cc(c(c2c1non2)N)[N+](=O)[O-]       | C04143698 | -12.1  | -1.08 | -12.68 | 3.28  | -1.62 |
| 5884 | CC(=C)CSC                            | C05158304 | -12.1  | 0.4   | -12.37 | 1.32  | -1.45 |
| 5885 | CCN1C(=O)CCC(=O)N1                   | C05312033 | -12.1  | -2.02 | -15.44 | 6.15  | -0.79 |
| 5886 | CON1C(=O)C(=O)NC1=O                  | C05526524 | -12.1  | -0.67 | -17.48 | 5.4   | 0.66  |
| 5887 | c1c(c(c[nH]1)F)F                     | C08700552 | -12.1  | -2.94 | -13.42 | 6.11  | -1.86 |
| 5888 | Cc1cc(no1)NC(=O)N                    | C12926585 | -12.1  | -1.63 | -17.68 | 7.02  | 0.18  |
| 5889 | c1ccnc(c1)C(=S)N                     | C15858193 | -12.1  | -2.43 | -15.71 | 7.66  | -1.63 |
| 5890 | c1cc(ncc1CO)N                        | C19850883 | -12.1  | -2.6  | -17.37 | 6.76  | 1.12  |
| 5891 | [H]/N=C/[Nc1ccc(cc1)F]N/C(=N/[H])/NN | C20458482 | -12.1  | -1.36 | -13.97 | 7.03  | -3.8  |
| 5892 | C1[C@@]([H])([C@H]1F)C(=O)Cl         | C21989321 | -12.1  | -0.02 | -12.45 | 3.01  | -2.65 |
| 5893 | c1nc2n(n1)CC[NH2+]C2                 | C26894602 | -12.1  | -0.67 | -16.21 | 5.41  | -0.63 |
| 5894 | C1C(CC1=O)CCl                        | C32625283 | -12.1  | -0.23 | -13.43 | 4.52  | -2.95 |
| 5895 | Cc1c(nc[nH]1)C(F)F                   | C00039458 | -12.09 | -3.53 | -12.44 | 6.58  | -2.69 |
| 5896 | c1ccc(cc1)NNC(=O)N)Cl                | C00156647 | -12.09 | -1.78 | -15.17 | 5.49  | -0.63 |
| 5897 | C(CCC)CC(=O)Cl                       | C01736654 | -12.09 | -0.82 | -13.74 | 3.36  | -0.88 |
| 5898 | Cc1c(ccc1[O-])O                      | C02173520 | -12.09 | -0.98 | -14.78 | 4.94  | -1.28 |
| 5899 | CC(=O)Nc1c(cc(cc1F)F)F               | C02576930 | -12.09 | 0.25  | -15.61 | 6.15  | -2.88 |
| 5900 | c1cc(ccc1CC=O)Cl                     | C02581072 | -12.09 | -3.37 | -9.54  | 4.89  | -4.07 |
| 5901 | COCC(=O)c1ccccc1                     | C05353997 | -12.09 | 0.62  | -13.94 | 2.83  | -1.6  |
| 5902 | c1c(c(nc(n1)N)Cl)[N+](=O)[O-]        | C05438590 | -12.09 | -1.19 | -13.29 | 4.49  | -2.11 |
| 5903 | CCO[C@]([H])(C)C=O                   | C05576053 | -12.09 | -0.89 | -12.79 | 3.14  | -1.54 |
| 5904 | CCOCC(=O)Cl                          | C05650726 | -12.09 | -0.93 | -14.64 | 4.28  | -0.8  |
| 5905 | c1c(nc(c(n1)N)C#N)C#N                | C08698500 | -12.09 | -1.65 | -16.55 | 6.38  | -0.28 |
| 5906 | Cc1ccc(cc1)N)C(F)F                   | C12359276 | -12.09 | -1.97 | -13.71 | 4.2   | -0.61 |
| 5907 | c1c(c[nH]c(=O)c1N)Br                 | C15022241 | -12.09 | -0.77 | -17.34 | 3.94  | 2.09  |
| 5908 | C/C=C/Cl)CO                          | C16970422 | -12.09 | -1.7  | -12.11 | 2.14  | -0.43 |
| 5909 | C/C=C/[C@H]1C=CC(=O)O1               | C17299313 | -12.09 | -0.43 | -15.24 | 7.08  | -3.5  |
| 5910 | CC(=O)[C@@]([H])(C#N)Cl              | C22011853 | -12.09 | 0.54  | -14.52 | 4.1   | -2.22 |
| 5911 | CC/C=C/CCOC=O                        | G2008A006 | -12.09 | -1.45 | -13.1  | 6.29  | -3.83 |
| 5912 | C=CCN=C=O                            | C01627092 | -12.08 | -0.67 | -13.54 | 1.98  | 0.15  |
| 5913 | C=COCC(F)F                           | C02040641 | -12.08 | -0.33 | -12.88 | 3.3   | -2.18 |
| 5914 | CCOC(=O)/C=C/Br                      | C02380553 | -12.08 | -0.31 | -10.83 | 2.33  | -3.27 |
| 5915 | CC[C@H]1CCC(=O)C1                    | C02507849 | -12.08 | -0.56 | -11.19 | 3.06  | -3.39 |
| 5916 | Cc1ccsc1C#N                          | C02510165 | -12.08 | -1.82 | -10.66 | 3.81  | -3.4  |
| 5917 | C(C=O)C(C(F)F)F                      | C02537055 | -12.08 | -0.72 | -12.79 | 3.78  | -2.35 |
| 5918 | c1cc(cc(c1C(F)F)N)C#N                | C02541529 | -12.08 | -3.88 | -9.68  | 4.19  | -2.72 |
| 5919 | C(CCS)CS                             | C03860245 | -12.08 | -1.12 | -9.37  | 1.45  | -3.05 |
| 5920 | c1nc(c2c(n1)[nH]nc2Br)N              | C05479148 | -12.08 | -1.53 | -13.67 | 4.37  | -1.25 |
| 5921 | c1cc(ccc1)SC(F)F                     | C15442446 | -12.08 | -0.18 | -12.8  | 3.73  | -2.84 |
| 5922 | c1c(c(nc1)N)N                        | C17325862 | -12.08 | -7.59 | -12.86 | 7.32  | 1.05  |
| 5923 | CSc1[nH]c(=O)ccn1                    | C17946259 | -12.08 | -0.33 | -16.39 | 6.16  | -1.53 |
| 5924 | c1cc(c(nc1)N)CO                      | C19735472 | -12.08 | -2.03 | -17.49 | 6.65  | 0.8   |
| 5925 | C[C@H](c1ccccc1O)O                   | C20030879 | -12.08 | -1.58 | -16.08 | 5.58  | 0     |
| 5926 | C[C@@]([H])(C#N)NCC=C                | C20177399 | -12.08 | -0.34 | -14.01 | 3.58  | -1.3  |
| 5927 | c1cc(cc(c1)F)/C=C/C=O                | C21304317 | -12.08 | -3.54 | -10.46 | 6.06  | -4.14 |
| 5928 | CCO[C@]([H])(C(C(F)F)F)F)F)F)O       | C01693056 | -12.07 | -4.78 | -6.88  | 2.04  | -2.45 |
| 5929 | c1c(ncs1)C#N                         | C02039551 | -12.07 | -2.59 | -14.22 | 6.28  | -1.55 |
| 5930 | CC(C)OC(=O)Cl                        | C02041092 | -12.07 | 0.28  | -12.84 | 2     | -1.52 |
| 5931 | c1cnc(nc1)C#N                        | C02531032 | -12.07 | -2.8  | -14.26 | 6.84  | -1.85 |
| 5932 | CCc1cc(cn1)N                         | C02537955 | -12.07 | -2.85 | -11.64 | 3.87  | -1.45 |
| 5933 | c1c(cn1)CO[N+](=O)[O-]               | C02552464 | -12.07 | -2.54 | -17.02 | 6.91  | 0.58  |
| 5934 | CC/C=C/C=C/C=O                       | C02567938 | -12.07 | -1.99 | -13.63 | 5.37  | -1.82 |
| 5935 | C/C(=N)O/c1cc[nH]1                   | C12481579 | -12.07 | -3.71 | -15.6  | 6.75  | 0.49  |
| 5936 | C1C(O)I                              | C16083106 | -12.07 | -0.14 | -12.81 | 2.25  | -1.37 |

|      |                                   |           |        |       |        |       |       |
|------|-----------------------------------|-----------|--------|-------|--------|-------|-------|
| 5937 | c1c(n(c(=S)nn1)N)[O-]             | C16382956 | -12.07 | -4.17 | -14.79 | 6.98  | -0.09 |
| 5938 | C#CCNCC#C                         | C19798465 | -12.07 | -1.11 | -12.82 | 3.19  | -1.33 |
| 5939 | Cc1cc(c(nc1)N)[N+](=O)[O-]        | C20357575 | -12.07 | -2.26 | -12.82 | 5.14  | -2.13 |
| 5940 | c1cc(ccc1N)Oc2cnccn2              | C20444289 | -12.07 | -1.9  | -16.01 | 6.47  | -0.64 |
| 5941 | CC(=O)N(c1ccccc1)O                | C00403543 | -12.06 | -5.01 | -14.51 | 7.74  | -0.28 |
| 5942 | C(C#CCO)NC(c=O)C(F)(F)F           | C01614435 | -12.06 | -1.45 | -16.91 | 5.61  | 0.69  |
| 5943 | CC(=O)C1CCC1                      | C02384765 | -12.06 | -0.77 | -11.54 | 3.31  | -3.06 |
| 5944 | CCCCCSC#N                         | C02507892 | -12.06 | -0.07 | -12.72 | 2.82  | -2.09 |
| 5945 | CC(=O)c1ccn(n1)C                  | C02536626 | -12.06 | -2.2  | -14.06 | 6.52  | -2.32 |
| 5946 | c1cc(c(cc1F)O)C(F)(F)F            | C02560196 | -12.06 | -2.76 | -10.61 | 2.96  | -1.65 |
| 5947 | c1cc(ccc1F)F)c2cno2               | C02578080 | -12.06 | -0.17 | -14.43 | 5.35  | -2.82 |
| 5948 | CCCN(C=O)C(F)(F)F                 | C03100060 | -12.06 | -1.66 | -12.32 | 3.35  | -1.42 |
| 5949 | Cc1nnc(s1)Br                      | C04290646 | -12.06 | -2.04 | -13.02 | 4.65  | -1.64 |
| 5950 | c1c(cc(c2c1[nH]cn2)F)F            | C04430748 | -12.06 | -4.42 | -13.8  | 7.05  | -0.89 |
| 5951 | C/(C=N)NC(=O)N)Cl                 | C04758465 | -12.06 | -1.61 | -17.47 | 6.13  | 0.89  |
| 5952 | CCc1c(nc(nc1)N)N                  | C05115159 | -12.06 | -2.99 | -13.38 | 5.11  | -0.79 |
| 5953 | CCOC(=O)C(=NO)N                   | C05672512 | -12.06 | -2.88 | -14.3  | 4.54  | 0.59  |
| 5954 | CNC(=S)Nc1ccc(c(c1)F)F            | C07571424 | -12.06 | 0.58  | -18.04 | 8.96  | -3.56 |
| 5955 | c1ccc(c(c1)N)n2cncn2              | C12397685 | -12.06 | -0.01 | -12.87 | 5.12  | -4.29 |
| 5956 | C1=CN=C2[C@H]1C=C(C=N2)Cl][O-]    | C14401174 | -12.06 | -0.79 | -15.49 | 5.51  | -1.29 |
| 5957 | Cn1cncc1C(=O)N                    | C16123785 | -12.06 | -2.95 | -15.9  | 7.24  | -0.45 |
| 5958 | CCc1c(c(=O)[nH]cn1)F              | C16158677 | -12.06 | -1.25 | -15.09 | 3.96  | 0.31  |
| 5959 | c1nc(c2c(n1)no[n+][2O-])N         | C17353724 | -12.06 | -0.57 | -17.26 | 7.74  | -1.98 |
| 5960 | c1cc(oc1)COCC#N                   | C19476664 | -12.06 | -1.82 | -16.41 | 8.56  | -2.38 |
| 5961 | c1cc(sc1)[C@@H](C#N)N             | C19984872 | -12.06 | -0.47 | -15.16 | 4.71  | -1.14 |
| 5962 | c1cc(ncc1)N                       | C21303107 | -12.06 | -3.09 | -16.95 | 8.23  | -0.25 |
| 5963 | C1C[C@@@H]2[C@H]1CCC2=C1)O        | C25695675 | -12.06 | -0.63 | -12.34 | 2.99  | -2.09 |
| 5964 | c1ccc(cc1)C(=O)N                  | C00152996 | -12.05 | -3.54 | -14.18 | 6.61  | -0.94 |
| 5965 | c1cnc(nc1)NC=O                    | C00393958 | -12.05 | -1.37 | -17.98 | 9.5   | -2.2  |
| 5966 | CCC(=O)c1ccc[nH]1                 | C01574407 | -12.05 | -2.31 | -11.76 | 4.84  | -2.82 |
| 5967 | C=CC1OCCCC1                       | C01590522 | -12.05 | 0.22  | -15.27 | 2.99  | 0.01  |
| 5968 | c1(c([nH]c[=O][nH]c1=O)C(F)(F)F)F | C01665340 | -12.05 | -3.14 | -13.78 | 5.04  | -0.16 |
| 5969 | C1CC=C(C1)C#N                     | C02584532 | -12.05 | 1.36  | -13.91 | 3.81  | -3.31 |
| 5970 | C(CCl)C(=N)O)N                    | C04202657 | -12.05 | -3.01 | -13.18 | 3.72  | 0.43  |
| 5971 | CCOC(=O)C(C)C(F)                  | C08700944 | -12.05 | -0.73 | -11    | 3.16  | -3.47 |
| 5972 | C1COc2c([nH]c[n2])S)O1            | C08701396 | -12.05 | -2.41 | -17.75 | 6.8   | 1.32  |
| 5973 | Cc1c(cn[nH]1)C(=O)C               | C15442858 | -12.05 | -3.69 | -15.69 | 8.86  | -1.52 |
| 5974 | c1cc(oc1)C(=O)Nn2cncn2            | C00055247 | -12.04 | -0.71 | -17.35 | 9.33  | -3.31 |
| 5975 | c1cncnc1C(=O)N                    | C00391130 | -12.04 | -2.99 | -16.36 | 6.94  | 0.37  |
| 5976 | [C@H]1(C(=O)NC(=O)S1)Br           | C01399351 | -12.04 | -0.33 | -15.33 | 3.45  | 0.16  |
| 5977 | Cc1c(cnc(n1)N)N                   | C01562299 | -12.04 | -5.97 | -13.88 | 5.03  | 2.78  |
| 5978 | C[C@H]1C=C[C@@H](S1)C             | C01619184 | -12.04 | -1.15 | -12.5  | 2.18  | -0.56 |
| 5979 | C=CC(=O)OCC#C                     | C01766086 | -12.04 | -0.38 | -13.52 | 4.76  | -2.9  |
| 5980 | CO[C@H]1CCCC=CO1                  | C03861323 | -12.04 | -0.64 | -11.57 | 2.36  | -2.19 |
| 5981 | c1cc(ncc1Cl)NC(=S)N               | C04298864 | -12.04 | -2.29 | -18.62 | 11.87 | -3    |
| 5982 | CSC(=S)N                          | C05734507 | -12.04 | -4.15 | -12.35 | 1.81  | 2.65  |
| 5983 | c1c(nc(s1)N)CO                    | C08698497 | -12.04 | -4.26 | -14.03 | 4.8   | 1.45  |
| 5984 | C(CCl)NC(=O)N1c(nnn1)N            | C16981573 | -12.04 | -4.36 | -12.97 | 6.38  | -1.08 |
| 5985 | c1cc(ccc1)OCC#N)N=O               | C19277149 | -12.04 | -2.56 | -14.82 | 7.15  | -1.81 |
| 5986 | C(=O)c1c(mns1)C(F)(F)F            | C20445091 | -12.04 | -0.37 | -14.34 | 3.98  | -1.32 |
| 5987 | COCC(=O)COCC=C                    | C20519037 | -12.04 | -0.44 | -14.96 | 5.96  | -2.6  |
| 5988 | c1cc(sc1)CC(=O)[S-]               | C00334133 | -12.03 | -2.83 | -12.11 | 5.04  | -2.12 |
| 5989 | COCC(=O)Nc1ccccc1O                | C00334817 | -12.03 | -0.25 | -17.2  | 5.48  | -0.06 |
| 5990 | CCNC(=O)c1ccccc1                  | C00394619 | -12.03 | 0.01  | -16.59 | 6.1   | -1.54 |
| 5991 | C=CCCCO                           | C01632700 | -12.03 | -1.73 | -11.76 | 2.06  | -0.6  |
| 5992 | CCCOCC(=O)CBr                     | C02545346 | -12.03 | -1.24 | -10.93 | 3.61  | -3.47 |
| 5993 | Cn1c(ccn1)C=O                     | C02559423 | -12.03 | -3.5  | -13.66 | 6.67  | -1.55 |
| 5994 | c1cc(oc1)CNC(=O)C(F)(F)F          | C03165337 | -12.03 | -3.55 | -11    | 4.11  | -1.58 |
| 5995 | [C@H](C(O)C(F)F)F)F)Cl            | C03812964 | -12.03 | -2.08 | -12.4  | 4.32  | -1.87 |
| 5996 | C1C[C@@@H](C=C[C@H]1O)O           | C03860565 | -12.03 | -3.5  | -13.13 | 3.08  | 1.52  |
| 5997 | C#N)C(Br)Br                       | C04254227 | -12.03 | -0.04 | -12.23 | 2.64  | -2.4  |
| 5998 | C1=C[C@@@H](C[C@@@H](C=C1)Br)O)O  | C04978561 | -12.03 | -1.97 | -14.32 | 4.01  | 0.24  |
| 5999 | C=CCCN=C(S)S                      | C05600963 | -12.03 | 0.03  | -15.61 | 1.71  | 1.84  |
| 6000 | COCC(=O)N(CCC)N=O                 | C05647924 | -12.03 | 1.31  | -15.58 | 3.28  | -1.04 |
| 6001 | c1cc(c(c(c1)F)C/C(=N)O)/N)F       | C06453052 | -12.03 | 0.51  | -18.45 | 5.59  | 0.33  |
| 6002 | Cn1c(c=O)cc[nH]c1=O               | C08765763 | -12.03 | -4.08 | -16.33 | 7.04  | 1.34  |
| 6003 | C(=C(C(F)F)F)C#N                  | C12360021 | -12.03 | 1.24  | -14.38 | 3.8   | -2.69 |
| 6004 | c1nc(c2c(n1)N=CC2)N               | C13518237 | -12.03 | -4.18 | -14.67 | 8.5   | -1.69 |
| 6005 | c1cnc(cc1Br)[N+](=O)[O-]          | C14982291 | -12.03 | -3.22 | -11.03 | 5.04  | -2.83 |
| 6006 | Cc1c(sc(n1)N)Cl                   | C15021512 | -12.03 | -2.29 | -11.76 | 3.44  | -1.43 |
| 6007 | c1cc(oc1)C=C/CO                   | C15416451 | -12.03 | -2.15 | -14.1  | 5.02  | -0.8  |
| 6008 | c1cnc(cc1O)C#N                    | C15767237 | -12.03 | 1.03  | -18.53 | 5.66  | -0.19 |
| 6009 | CCc1ccc(s1)CS                     | C19424913 | -12.03 | -0.9  | -8.61  | 2.09  | -4.61 |
| 6010 | c1cc(c(cc1Br)N)[N+](=O)[O-]       | C19801685 | -12.03 | -2.16 | -11.1  | 4.1   | -2.87 |
| 6011 | c1c(cnc(c1Br)N)C#N                | C20246651 | -12.03 | -1.15 | -13.51 | 4.51  | -1.88 |
| 6012 | CC(=O)c1ccc(c(c1)F)N              | C20310704 | -12.03 | -0.95 | -14.8  | 5.8   | -2.08 |
| 6013 | COCC(=O)Cn1cccc1C=O               | C20447607 | -12.03 | -1.17 | -15.33 | 8.2   | -3.74 |
| 6014 | c1cncnc1CNC(=O)N                  | C22148192 | -12.03 | -0.79 | -21.65 | 9.35  | 1.05  |
| 6015 | c1cc(oc1)c2cc(no2)C#N             | C32005924 | -12.03 | -0.39 | -12.72 | 4.37  | -3.29 |
| 6016 | Cc1nc(cs1)CCl                     | C00157256 | -12.02 | -1.5  | -11.55 | 3.79  | -2.76 |
| 6017 | CCC(=O)OCC                        | C00388078 | -12.02 | -0.44 | -12.34 | 3.7   | -2.93 |
| 6018 | CNC(=O)Nc1ccccc1                  | C00395001 | -12.02 | 0.37  | -18.01 | 7.3   | -1.67 |
| 6019 | c1c(ccc1C=O)C=O                   | C01296257 | -12.02 | -1.75 | -14.13 | 6.08  | -2.22 |
| 6020 | COCC(=O)CCl                       | C01641046 | -12.02 | -1.1  | -13.37 | 4.55  | -2.1  |
| 6021 | c1ccc2c(c1)CC(=O)O2               | C01757785 | -12.02 | -0.63 | -12.94 | 5.61  | -4.07 |
| 6022 | CC[C@H](N+)(=O)[O-])Br            | C01758984 | -12.02 | 0.07  | -14.29 | 2.57  | -0.37 |
| 6023 | Cc1cnc(s1)Cl                      | C02507113 | -12.02 | -1.46 | -13.72 | 3     | 0.16  |
| 6024 | C[C@H](c1ccccc1F)O                | C02598066 | -12.02 | -1.4  | -11.57 | 3.08  | -2.14 |
| 6025 | c12c(sc(=S)s1)SSS2                | C03194293 | -12.02 | -0.42 | -11.9  | 0.81  | -0.51 |
| 6026 | COCC(=O)CS                        | C03860880 | -12.02 | -1.33 | -13.25 | 4.27  | -1.72 |

|      |                                |            |        |       |        |       |       |
|------|--------------------------------|------------|--------|-------|--------|-------|-------|
| 6027 | C1C[C@H]2C(=C1)CC(=O)O2        | C05600430  | -12.02 | -0.45 | -13.57 | 5.47  | -3.47 |
| 6028 | C1CO[C@@H]1CBr                 | C16083109  | -12.02 | 0.68  | -13.64 | 2.61  | -1.67 |
| 6029 | C1C=C(NC1=O)N                  | C32599192  | -12.02 | -4.02 | -15.91 | 7.89  | 0.03  |
| 6030 | c1cc(cc1C(=O)N)C(F)F           | C00086933  | -12.01 | -5.43 | -10.8  | 4.36  | -0.15 |
| 6031 | COC(=O)C=C(F)F                 | C00158099  | -12.01 | -0.16 | -11.94 | 2.95  | -2.87 |
| 6032 | Cc1ccc(cc1)N=C=O               | C00159655  | -12.01 | -1.64 | -11.2  | 1.77  | -0.94 |
| 6033 | c1ccc(c1)N=C=O                 | C00164828  | -12.01 | 0.31  | -14.09 | 2.65  | -0.89 |
| 6034 | COC1c(cc(c1F)F)F               | C00406983  | -12.01 | 0.32  | -11.61 | 2.54  | -3.27 |
| 6035 | Cn1cnc(c1[N+](=O)[O-])Cl       | C01299831  | -12.01 | -3.18 | -11.57 | 7.18  | -4.44 |
| 6036 | Cn1c(=NC#N)n(n1)C              | C01564396  | -12.01 | -0.13 | -12.74 | 4.48  | -3.62 |
| 6037 | CC/C=C(C)C=O                   | C02034338  | -12.01 | -0.89 | -12.12 | 3.96  | -2.95 |
| 6038 | CCOC(=O)C@H(C)Cl               | C02034883  | -12.01 | -0.55 | -11.4  | 3.29  | -3.35 |
| 6039 | c1nc2c(s1)ncs2                 | C02519608  | -12.01 | -2.27 | -18.06 | 7.18  | 1.13  |
| 6040 | C=CCCC#N                       | C02539655  | -12.01 | -0.66 | -12.53 | 4.82  | -3.64 |
| 6041 | c1cscc1C(=N/O)N                | C02547398  | -12.01 | -1.61 | -14.82 | 4.9   | -0.48 |
| 6042 | c1ccc2c(c1)[C@H](C2=O)Cl       | C03848334  | -12.01 | 2.15  | -14.33 | 4.29  | -4.12 |
| 6043 | C=CCN1CCSC1=[NH2+]             | C03865387  | -12.01 | -0.69 | -12.5  | 4.02  | -2.83 |
| 6044 | Cn1c(cnc1CC)Cl                 | C04206489  | -12.01 | 0.06  | -12.95 | 4.29  | -3.42 |
| 6045 | CCOC(=O)c1c(c[nH]n1)C=O        | C04453807  | -12.01 | 0.56  | -15.85 | 5.14  | -1.86 |
| 6046 | c1c(nc[nH]1)CCO                | C04533393  | -12.01 | -5.42 | -14.67 | 6.15  | 1.93  |
| 6047 | C/C=C/C(=O)OC                  | C04777523  | -12.01 | -0.18 | -11.88 | 3.75  | -3.71 |
| 6048 | Cc1cc(cs1)C=O                  | C04999814  | -12.01 | -0.75 | -13.83 | 5.55  | -2.98 |
| 6049 | COCNc1ccccc1                   | C05329528  | -12.01 | -3.18 | -12.91 | 2.85  | 1.22  |
| 6050 | CCn1c(cc(=O)[nH]c1=O)[O-]      | C05346557  | -12.01 | -3.4  | -18.24 | 8.45  | 1.19  |
| 6051 | CC(=O)Nc1cc[nH]1               | C08733367  | -12.01 | -5.75 | -13.55 | 7.99  | -0.71 |
| 6052 | COC(=O)C(=N)[O-]C#N            | C12504657  | -12.01 | -1.94 | -15.35 | 5.71  | -0.43 |
| 6053 | c1cc(nc1)CNC(=O)C(F)F          | C13208169  | -12.01 | -3.94 | -11.43 | 4.95  | -1.59 |
| 6054 | c1c(sc(n1)Cl)[N+](=O)[O-]Cl    | C19841416  | -12.01 | -2.47 | -9.53  | 2.69  | -2.71 |
| 6055 | c1cc(ncc1CO)C#N                | C21987003  | -12.01 | -1.34 | -17.79 | 7.38  | -0.26 |
| 6056 | CC1=NCCC1                      | C25695470  | -12.01 | -1.13 | -12.28 | 2.58  | -1.18 |
| 6057 | c1c(cnc(n1)NO)Br               | C26441014  | -12.01 | -3.36 | -14.94 | 7.25  | -0.97 |
| 6058 | c1cc(cc(c1F)N)c2ncnc(n2)N      | C00089558  | -12    | -0.41 | -10.6  | 5.13  | -6.12 |
| 6059 | CCOC(=O)C@H(C)O                | C00391792  | -12    | -3.81 | -13.34 | 6.23  | -1.08 |
| 6060 | COC(=O)C1cnc(s1)N              | C00574159  | -12    | -2.05 | -15.52 | 7.48  | -1.91 |
| 6061 | COC([C@H](F)Cl)F               | C02040627  | -12    | -1.32 | -11.3  | 2.25  | -1.64 |
| 6062 | c1c(cc(c1C)C#N)F)F             | C02575072  | -12    | -2.31 | -13.11 | 7.21  | -3.78 |
| 6063 | C=CCOCC1                       | C04203523  | -12    | -0.22 | -11.73 | 2.53  | -2.57 |
| 6064 | [C@H](C(F)F)(C(F)F)C1O         | C04958291  | -12    | -0.48 | -13.16 | 2.23  | -0.59 |
| 6065 | c1c[nH]c(=O)cc1N               | C14982073  | -12    | -3.84 | -16.25 | 5.31  | 2.77  |
| 6066 | c1cc2c(cc1F)[nH]nc2O           | C14983479  | -12    | -1.23 | -15.74 | 4.07  | 0.9   |
| 6067 | CCOc1cc([nH]n1)C               | C17058893  | -12    | -0.1  | -15.07 | 4.09  | -0.92 |
| 6068 | Cc1c(n2c(nc(n2)nn1)[O-]        | C17128112  | -12    | -5.54 | -9.92  | 6.36  | -2.88 |
| 6069 | C/C(=N/O)/c1ccsc1              | C17142597  | -12    | -2.91 | -12.22 | 4.42  | -1.28 |
| 6070 | C/C=C/OC(=O)CC#N               | C21986548  | -12    | -2.61 | -15.29 | 9.35  | -3.44 |
| 6071 | C/C(=N/O)/c1ccccc1             | C00160850  | -11.99 | -1.61 | -14.32 | 4.63  | -0.69 |
| 6072 | c1cnc(cn1)C(=S)N               | C00165372  | -11.99 | -3.61 | -16.22 | 8.1   | -0.27 |
| 6073 | c1cc(c(nc1)Cl)CO               | C00168331  | -11.99 | -1.52 | -14.08 | 4.15  | -0.54 |
| 6074 | c1c(c(=O)[nH]c(=O)[nH]1)I      | C01092752  | -11.99 | -4.9  | -15.19 | 8.12  | -0.02 |
| 6075 | CN1C(=O)C@H([SC1=S)Br          | C01690538  | -11.99 | 1.08  | -13.69 | 3.44  | -2.82 |
| 6076 | c1nncn1NC(=O)N                 | C01881932  | -11.99 | -5.64 | -19.36 | 11.03 | 1.98  |
| 6077 | c1cc(c(cc1C#N)O)N              | C02022082  | -11.99 | -0.92 | -12.82 | 6.07  | -1.31 |
| 6078 | C1C(=CS(=O)(=O)O1)Br           | C02025439  | -11.99 | -0.83 | -18.02 | 3.57  | 0.3   |
| 6079 | c1cc(c(cc1CC#N)F)Cl            | C02527783  | -11.99 | -2.97 | -12.24 | 7.89  | -4.67 |
| 6080 | c1cc(c(cc1NC#N)Cl)O            | C06093070  | -11.99 | -5.04 | -12.11 | 5.63  | -0.46 |
| 6081 | CCn1c(=O)[nH]c(=O)cn1          | C16887532  | -11.99 | 0.55  | -18.32 | 5.64  | 0.15  |
| 6082 | c1cc2c(cc1N)OCCO2              | C00164370  | -11.98 | -0.63 | -15.09 | 4.52  | -0.79 |
| 6083 | C=C[C@H]([C@H](C=C)O)O         | C00389840  | -11.98 | -1.14 | -14.09 | 2.57  | 0.67  |
| 6084 | CCOC(=O)C(=O)OCC               | C01648270  | -11.98 | 0.58  | -12.66 | 3.62  | -3.53 |
| 6085 | CCOC(=O)C[N+](=O)[O-]          | C01675129  | -11.98 | -1.02 | -15.31 | 7.28  | -2.92 |
| 6086 | c1cnc(cn1)C=O                  | C02391857  | -11.98 | -3.14 | -17.36 | 8.52  | 0.01  |
| 6087 | CCOCn1cc(cn1)N                 | C02537655  | -11.98 | -0.23 | -15.73 | 4.04  | -0.06 |
| 6088 | CC(C)C(=O)CC(=O)C              | C03848396  | -11.98 | -2.37 | -10.43 | 3.68  | -2.86 |
| 6089 | C1(=O)C(=O)C(=O)C(=O)C(=O)C1=O | C03861007  | -11.98 | 1.61  | -17.34 | 5.44  | -1.69 |
| 6090 | C(CSC(=[NH2+])N)O              | C03865389  | -11.98 | -3.63 | -14.32 | 3.96  | 2.01  |
| 6091 | c1ccnc(c1)/C=N/O               | C04758521  | -11.98 | -3.55 | -15.99 | 7.85  | -0.28 |
| 6092 | COP(=O)(C=[N+]=[N-])OC         | C05493067  | -11.98 | -2.55 | -12.61 | 5.79  | -2.61 |
| 6093 | CC(=O)CCc1cccs1                | C11631233  | -11.98 | -1.59 | -10.25 | 4.12  | -4.26 |
| 6094 | c1oc(c1C#N)Br                  | C12370773  | -11.98 | -2.4  | -11.27 | 4.37  | -2.68 |
| 6095 | C(#N)/C(=C(\C#N)/Cl)F          | C17174231  | -11.98 | -0.68 | -11.8  | 3     | -2.5  |
| 6096 | Cc1c(ncnc1)N)N                 | C25491255  | -11.98 | -3.2  | -14.46 | 6.45  | -0.76 |
| 6097 | c1cc(ccc1)[N+](=O)[O-]N        | C00047987  | -11.97 | -2.98 | -12.36 | 5.66  | -2.3  |
| 6098 | COC(=O)C@H(CSCC1=O             | C00160859  | -11.97 | 2.69  | -16.11 | 4.35  | -2.9  |
| 6099 | Cn1c(=S)[nH]c(=S)cn1           | C01689464  | -11.97 | -1.49 | -14.03 | 6.24  | -2.7  |
| 6100 | CCCCN=C=S                      | C01733350  | -11.97 | -0.66 | -13.11 | 1.19  | 0.61  |
| 6101 | C/C(=C/c1ccoc1)/C=O            | C01850921  | -11.97 | -0.03 | -15.88 | 5.98  | -2.04 |
| 6102 | Cc1ccc(cc1)NCC#N               | C01867042  | -11.97 | -4.39 | -11.6  | 4.9   | -0.88 |
| 6103 | c1nc(no1)CC1                   | C02169235  | -11.97 | -2.1  | -14.54 | 5.26  | -0.6  |
| 6104 | Cc1cscc1C                      | C02383464  | -11.97 | -0.39 | -12.31 | 1.63  | -0.9  |
| 6105 | c1ccc(c(c1)NC(=[NH2+])N)F      | C02526901  | -11.97 | 0.35  | -20.16 | 10.46 | -2.63 |
| 6106 | c1cc(ncc1C=O)Br                | C02527534  | -11.97 | -1.59 | -13.53 | 5.44  | -2.29 |
| 6107 | Cc1ccnnc1C(F)F                 | C02536622  | -11.97 | -1.47 | -13.05 | 4.76  | -2.21 |
| 6108 | c1nc([n-]n1)NC=O               | C03954260  | -11.97 | -2.6  | -18.09 | 8.09  | 0.63  |
| 6109 | c1ccc(cc1)N=C(C#N)C#N          | C04265762  | -11.97 | -1.03 | -10.98 | 3.24  | -3.2  |
| 6110 | CC(=O)c1cc(c(cc1F)F)F          | C04290138  | -11.97 | 0.72  | -15.08 | 5.26  | -2.88 |
| 6111 | c1nncn1N                       | C04692512  | -11.97 | -3.81 | -13.18 | 7.1   | -2.08 |
| 6112 | C[C@H](c1cc([nH]1)O)O          | C05387056  | -11.97 | -5.12 | -16.3  | 5.39  | 4.06  |
| 6113 | C=C[C@H]([C#C]O                | C12363479  | -11.97 | -1.45 | -12.54 | 2.59  | -0.56 |
| 6114 | Cn1cc(nn1)N                    | C19089902  | -11.97 | -3.53 | -15.39 | 6.98  | -0.03 |
| 6115 | COc1ccc(cc1)S                  | C197330599 | -11.97 | -0.42 | -10.8  | 2.1   | -2.84 |
| 6116 | CC(=O)Nc1ccc(cc1F)F            | C00079075  | -11.96 | -1.53 | -12.96 | 5.3   | -2.77 |

|      |                                |           |        |       |        |       |       |
|------|--------------------------------|-----------|--------|-------|--------|-------|-------|
| 6117 | COC(=O)c1ccoc1                 | C01567963 | -11.96 | -0.9  | -14.4  | 5.79  | -2.45 |
| 6118 | COC(=O)C(=C)CC=C               | C01573411 | -11.96 | -1.13 | -12.14 | 4.01  | -2.7  |
| 6119 | c1c(c(c(c1F)F)F)CC#N           | C02382107 | -11.96 | -2.15 | -14.14 | 8.67  | -4.34 |
| 6120 | C(/C=C/C(C(C(F)F)F)F)F)O       | C02530856 | -11.96 | -2.7  | -10.05 | 3.13  | -2.33 |
| 6121 | c1cn(nc1[N+](=O)[O-])C(F)F     | C02534798 | -11.96 | -5.9  | -8.71  | 5.95  | -3.3  |
| 6122 | c1c(cc(c1F)C(=O)Cl)F           | C02545260 | -11.96 | 2.68  | -15.04 | 2.91  | -2.51 |
| 6123 | Cn1c(nnn1)SC                   | C03108049 | -11.96 | -1.43 | -15.59 | 6.22  | -1.16 |
| 6124 | Cc1cc(not)NC(=O)C(F)F          | C03165372 | -11.96 | -1.84 | -11.71 | 3.93  | -2.34 |
| 6125 | C1C(=CC(=O)CO)O                | C04622256 | -11.96 | -5.59 | -15.6  | 8.82  | 0.42  |
| 6126 | COC1=NO[C@H]2[C@H](OC=C2       | C06169744 | -11.96 | -1.94 | -15.84 | 5.25  | 0.58  |
| 6127 | CCC/C=C/CO                     | C15272642 | -11.96 | -0.74 | -11.62 | 2.15  | -1.75 |
| 6128 | c1c(c(c(c1F)Cl)F)N[N+](=O)[O-] | C16158749 | -11.96 | -3    | -8.29  | 2.16  | -2.83 |
| 6129 | CC[C@H](C)(NH2+)CC(F)F         | C19504671 | -11.96 | -0.37 | -10.75 | 1.55  | -2.38 |
| 6130 | c1c(cc(c1[N+](=O)[O-])F)F      | C21982378 | -11.96 | -0.42 | -11.85 | 4.27  | -3.96 |
| 6131 | Cc1cccc(c1N)N                  | C00153100 | -11.95 | -4.76 | -8.92  | 2.64  | -0.92 |
| 6132 | c1cscc1C(=O)CBr                | C00158757 | -11.95 | 1.05  | -15.42 | 5.98  | -3.55 |
| 6133 | C/C=C/[C@H](c1cccc1)O          | C01591833 | -11.95 | -1.14 | -13.17 | 2.3   | 0.06  |
| 6134 | C=C/C=C/C=O                    | C01692349 | -11.95 | -1.33 | -13.56 | 5.31  | -2.37 |
| 6135 | c1cnnnc1                       | C01847599 | -11.95 | -1.94 | -14.88 | 5.4   | -0.53 |
| 6136 | c1c(cnc(n1)Cl)I                | C02028368 | -11.95 | 1.06  | -16.22 | 2.25  | 0.96  |
| 6137 | CC(=O)c1ccc(s1)C=O             | C02566479 | -11.95 | -0.96 | -14.78 | 6.69  | -2.9  |
| 6138 | c1cnc(cc1C(F)F)Cl              | C02584286 | -11.95 | 0.77  | -13.79 | 2.82  | -1.75 |
| 6139 | Cn1cn[nH]c1=S                  | C04529133 | -11.95 | -2.45 | -13.73 | 7.08  | -2.86 |
| 6140 | Cn1cnnn1                       | C06072454 | -11.95 | -1.89 | -14.32 | 5.17  | -0.91 |
| 6141 | C=CCSC(=[NH2+])N               | C06668743 | -11.95 | -2.73 | -9.78  | 2.13  | -1.57 |
| 6142 | c1cc(=O)[nH]c(c1)F             | C08698075 | -11.95 | -2.83 | -16    | 5.89  | 0.99  |
| 6143 | COC(=O)C=C(Cl)CCBr             | C17062716 | -11.95 | -0.46 | -12.75 | 4.94  | -3.68 |
| 6144 | c1ccc2c(c1)C[C@H](O2)N=C=O     | C19428274 | -11.95 | -0.81 | -15.16 | 4.42  | -0.4  |
| 6145 | CNc1c(cccc1F)F                 | C20359426 | -11.95 | -1.44 | -11.19 | 3.22  | -2.54 |
| 6146 | c1cc(c(c1N)[N+](=O)[O-])O      | C25723529 | -11.95 | -1.43 | -15.76 | 6.08  | -0.85 |
| 6147 | CC(=O)Cc1ccc(cc1)F             | C00156292 | -11.94 | -1.59 | -11.97 | 6.03  | -4.42 |
| 6148 | Cc1ccc(o1)C(=O)C               | C01596545 | -11.94 | -1.44 | -12.02 | 4.51  | -2.99 |
| 6149 | c1cnnnc1                       | C01682358 | -11.94 | -1.91 | -14.52 | 5.69  | -1.2  |
| 6150 | CCSCC1                         | C01712614 | -11.94 | 0.27  | -9.68  | 1.14  | -3.66 |
| 6151 | COc1nc(ns1)N                   | C02506770 | -11.94 | -2.05 | -15.73 | 5.12  | 0.71  |
| 6152 | c1nnc(n1)CC#N                  | C02569385 | -11.94 | -2.83 | -17.25 | 11.28 | -3.14 |
| 6153 | CC(C=O)c1ccccc1                | C02571387 | -11.94 | -2.2  | -11.04 | 4.44  | -3.14 |
| 6154 | CCc1[nH]ccn1                   | C08283843 | -11.94 | -0.14 | -14.68 | 4.96  | -2.08 |
| 6155 | c1c[nH]c2c1nc(on2)Br           | C21303791 | -11.94 | -1.68 | -15.99 | 7.74  | -2.01 |
| 6156 | c1c(c[nH+]c(c1Br)F)[O-]        | C21981944 | -11.94 | 0.23  | -18.09 | 6.19  | -0.27 |
| 6157 | c1cc(ccc1CC#N)Cl               | C00157142 | -11.93 | -2.41 | -13.84 | 6.39  | -2.06 |
| 6158 | COc1ccc(cc1)O                  | C00394208 | -11.93 | -0.73 | -14.12 | 3.84  | -0.93 |
| 6159 | c1ccc(c(c1)C(=O)C=O)O          | C01562451 | -11.93 | 0.02  | -19.75 | 10.44 | -2.64 |
| 6160 | C1CCC(C1)CC#N                  | C01627371 | -11.93 | -0.9  | -11.63 | 4.51  | -3.91 |
| 6161 | C=COCCO                        | C02031158 | -11.93 | -2.98 | -13.62 | 4.12  | 0.55  |
| 6162 | C1SCS(=[NH2+])N1CCCI           | C02391995 | -11.93 | -0.08 | -13.25 | 4.29  | -2.88 |
| 6163 | C1CCN/C(=[NH+]/C#N)/C1         | C04106190 | -11.93 | 0.21  | -16.58 | 8.5   | -4.06 |
| 6164 | C[C@H](C(=O)C)S                | C04802659 | -11.93 | -1.38 | -12.71 | 4.3   | -2.13 |
| 6165 | CC(=O)C[P@@](O)(P@)(O)OC       | C05188567 | -11.93 | -5.28 | -12.6  | 6.03  | -0.08 |
| 6166 | c1cncnc1C=N/O                  | C05369331 | -11.93 | -1.62 | -18.46 | 7.47  | 0.68  |
| 6167 | c1cc(c(nc1)C#N)O               | C13282563 | -11.93 | -0.66 | -18.39 | 7.32  | -0.21 |
| 6168 | CCOC(=O)c1cccnc1N              | C19818956 | -11.93 | -1.94 | -12.03 | 4.48  | -2.43 |
| 6169 | c1cc(c(cc1C(F)F)F)C#N          | C00155280 | -11.92 | 1.36  | -13.55 | 4.41  | -4.14 |
| 6170 | C1C[C@H](C(=O)C)Cl             | C01690074 | -11.92 | -0.64 | -12.26 | 3.79  | -2.8  |
| 6171 | CC[C@H](C(=[NH+](=O)[O-])Br    | C02042099 | -11.92 | -0.92 | -13.12 | 2.46  | -0.35 |
| 6172 | CCOC(=O)c1ccc(nc1)F            | C02383121 | -11.92 | 1.48  | -13.46 | 3.43  | -3.36 |
| 6173 | C(CCl)N(C(=O)O)N=O             | C04683405 | -11.92 | -0.57 | -15.52 | 3.77  | 0.39  |
| 6174 | CO/C=C/Cl/C                    | C04758251 | -11.92 | -2.24 | -11.55 | 4.26  | -2.39 |
| 6175 | c1(c(non1)N)c2nc(on2)[O-]      | C05753650 | -11.92 | -2.16 | -17.63 | 6.18  | 1.68  |
| 6176 | c1cc[nH]c(c1=O)c1              | C08737707 | -11.92 | -2.84 | -14.81 | 4.79  | 0.93  |
| 6177 | Cc1[nH]c(=O)ccn1               | C18038081 | -11.92 | -2.51 | -16.67 | 8.23  | -0.98 |
| 6178 | COc1cnc(nc1)Cl                 | C21298676 | -11.92 | 1.49  | -16.14 | 4.04  | -1.31 |
| 6179 | c1c(noc1C2CC2)C#N              | C32005417 | -11.92 | 2.1   | -14.86 | 4.32  | -3.49 |
| 6180 | c1cc(c(c1)N=C=O)F(C)F(F)F      | C00152311 | -11.91 | -2.56 | -10.71 | 4.3   | -2.95 |
| 6181 | c1cc(c(cc1O)O)O                | C00388437 | -11.91 | -2.04 | -18.17 | 5.75  | 2.55  |
| 6182 | c1cc(ccc1O)I                   | C00391103 | -11.91 | -0.32 | -15.14 | 2.29  | 1.26  |
| 6183 | c1ccc2cnncc2c1                 | C00404458 | -11.91 | -2.3  | -13.37 | 6.67  | -2.91 |
| 6184 | c1c2cn(c1)CCC2=O               | C01706477 | -11.91 | -1.14 | -14.76 | 7.09  | -3.1  |
| 6185 | CCOCc1ccc(cc1)F                | C02381233 | -11.91 | -1.73 | -11.29 | 3.28  | -2.17 |
| 6186 | COC(=O)CNC=O                   | C02384738 | -11.91 | -1.41 | -16.27 | 6.15  | -0.39 |
| 6187 | Cc1ccn(n1)CC#N                 | C02537500 | -11.91 | -3.25 | -15.97 | 10.03 | -2.72 |
| 6188 | C#CCOC1ccccc1N                 | C09239393 | -11.91 | -2.23 | -11.69 | 4.43  | -2.41 |
| 6189 | c1(nnc(s1)NN)C(F)F             | C12336338 | -11.91 | -5.84 | -11.45 | 5.91  | -0.53 |
| 6190 | Cc1c[nH]c(=O)cn1               | C16955422 | -11.91 | -3.36 | -17.02 | 8.63  | -0.16 |
| 6191 | CC1=CN[C@H](C=C1)O             | C22060898 | -11.91 | -2.94 | -14.86 | 4.87  | 1.01  |
| 6192 | c1cc(ccc1NC(=S)NN)F            | C00164366 | -11.9  | -1.02 | -17.41 | 9.14  | -2.61 |
| 6193 | CC(=CC=O)C                     | C00896834 | -11.9  | -1.28 | -12.92 | 4.59  | -2.29 |
| 6194 | Cc1nnc(n1)N/C                  | C01049738 | -11.9  | -3.21 | -14.58 | 7.76  | -1.87 |
| 6195 | COSc1ccccc1                    | C01557882 | -11.9  | -0.2  | -15.23 | 3.3   | 0.24  |
| 6196 | C/C=C/C(=O)OC                  | C01561844 | -11.9  | -0.6  | -12.64 | 3.94  | -2.61 |
| 6197 | CC(=O)SC(=O)C                  | C01680715 | -11.9  | -0.15 | -16.55 | 6.2   | -1.39 |
| 6198 | CCN(CC)C#N                     | C01688361 | -11.9  | 1.18  | -12.3  | 3.98  | -4.77 |
| 6199 | CC(=O)CCSC                     | C01850546 | -11.9  | 1.11  | -13.57 | 3.63  | -3.06 |
| 6200 | c1ccc(cc1)NC(=O)CF             | C02040810 | -11.9  | -2.37 | -17.42 | 10.63 | -2.73 |
| 6201 | COC(=O)C1=CCCC1                | C02561362 | -11.9  | 2.4   | -14.59 | 3.92  | -3.63 |
| 6202 | Cc1ccc(o1)/C=C/[N+](=O)[O-]    | C03119557 | -11.9  | -0.65 | -12.29 | 5.31  | -4.27 |
| 6203 | COC(=O)NC=C(Cl)Cl              | C03164822 | -11.9  | -0.34 | -13.98 | 2.77  | -0.34 |
| 6204 | C1CC(=O)N(C1)CCO               | C04521571 | -11.9  | -3.81 | -14.44 | 6.18  | 0.18  |
| 6205 | C/C(=N/OC)/C(=O)C              | C05412611 | -11.9  | 0.15  | -13.35 | 2.99  | -1.68 |
| 6206 | CCOC(=O)C=C/N=[N+]=[N-]        | C05828240 | -11.9  | 0.19  | -12.43 | 2.62  | -2.27 |

|      |                                     |           |        |       |        |       |       |
|------|-------------------------------------|-----------|--------|-------|--------|-------|-------|
| 6207 | c1c[nH]c2c1cc(cn2)l                 | C06643321 | -11.9  | -0.93 | -11.42 | 4.21  | -3.76 |
| 6208 | c1c(=S)[nH]c(n1)l[O-]               | C08615435 | -11.9  | -3.14 | -17.54 | 5.25  | 3.54  |
| 6209 | c1c2c(c(nc1N)O)n[nH]n2              | C08659459 | -11.9  | -5.4  | -16.78 | 6.28  | 4     |
| 6210 | CC/C=C/COC=O                        | C14438701 | -11.9  | -1.49 | -12.99 | 6.42  | -3.83 |
| 6211 | Cc1ccc2cn[nH]c2c1                   | C14983527 | -11.9  | -0.63 | -12.48 | 4.1   | -2.89 |
| 6212 | CNc1[nH]ncc(=O)n1                   | C17106102 | -11.9  | -1.96 | -17.78 | 6.06  | 1.77  |
| 6213 | [H]N=C(Nc1cc(=O)n1)C(=O)[NH+]=C(N)N | C20459083 | -11.9  | -4.06 | -17.58 | 12.65 | -2.91 |
| 6214 | c1c(c(cnc1Cl)Cl)Cl                  | C21986485 | -11.9  | 0.89  | -11.17 | 1.47  | -3.09 |
| 6215 | C#C[C@H](c1cccc1Cl)O                | C21998451 | -11.9  | -1.31 | -13.26 | 5.42  | -2.76 |
| 6216 | c1c(c(n1)CC#N                       | C26547910 | -11.9  | -1.06 | -17.08 | 8.47  | -2.22 |
| 6217 | Cn1c(=O)ccc(n1)Br                   | C29865944 | -11.9  | -2.93 | -12.44 | 5.03  | -1.56 |
| 6218 | c1ccc2c(c1)cncc2                    | C00160344 | -11.89 | -0.82 | -13.2  | 5.61  | -3.48 |
| 6219 | C[C@H](c1cccc(c1)N)O                | C00404425 | -11.89 | -2.27 | -12.82 | 3.63  | -0.44 |
| 6220 | CCCC=O                              | C01667603 | -11.89 | -1.3  | -11.55 | 3.55  | -2.59 |
| 6221 | CCc1cccc(c1)N                       | C02034642 | -11.89 | -1.02 | -9.91  | 1.92  | -2.88 |
| 6222 | CC(=C)CCCC#N                        | C02567414 | -11.89 | -0.08 | -12.68 | 4.9   | -4.03 |
| 6223 | Cc1ccsc1C(=O)N                      | C02573585 | -11.89 | -0.01 | -16.48 | 5.39  | -0.79 |
| 6224 | c1cc(c(cc1N)[N+](=O)[O-])N          | C03860651 | -11.89 | -3.14 | -14.24 | 6.32  | -0.83 |
| 6225 | C(CC)/C(=N)N                        | C04202658 | -11.89 | -0.99 | -13.17 | 2.83  | -0.55 |
| 6226 | C(CN[N+](=O)[O-])N                  | C04530237 | -11.89 | -3.88 | -15.93 | 8.41  | -0.49 |
| 6227 | [H]N=C[C@H](C(=O)OCC)[N+](=O)[O-]   | C04876799 | -11.89 | -1.72 | -14.51 | 3.6   | 0.74  |
| 6228 | c1nnnc1N2C=CCC=C2                   | C05778327 | -11.89 | -1.15 | -12.38 | 6.84  | -5.19 |
| 6229 | C/C=N/C(=O)N)Cl                     | C17002775 | -11.89 | -1.99 | -17.06 | 6.24  | 0.91  |
| 6230 | C1=C[C@@H](C(=C1)CCO)S              | C21991846 | -11.89 | -2.94 | -11.4  | 3.93  | -1.47 |
| 6231 | c1cc(nc(c1)F)N                      | C21999170 | -11.89 | -1.45 | -13.97 | 5.35  | -1.82 |
| 6232 | c1cnc(c1NC2CC2)N                    | C32914848 | -11.89 | -3.25 | -11.41 | 5.46  | -2.69 |
| 6233 | c1ccc(c(=O)cc1)O                    | C00392003 | -11.88 | -3.33 | -16.53 | 9.96  | -1.97 |
| 6234 | c1csc(c1Br)Cl                       | C01023254 | -11.88 | -0.75 | -9.62  | 1.88  | -3.39 |
| 6235 | C1C(=O)NC(=O)CS1                    | C01668590 | -11.88 | 0.65  | -18.05 | 5.54  | -0.01 |
| 6236 | CCOc1ccc(cc1)C                      | C01693363 | -11.88 | 1.23  | -14.44 | 2.5   | -1.17 |
| 6237 | C[C@H](C#N)O(C=O)C                  | C01697346 | -11.88 | 0.34  | -14.45 | 4.9   | -2.68 |
| 6238 | CC#CCO                              | C02015866 | -11.88 | -1.6  | -12.51 | 3     | -0.77 |
| 6239 | c1cc(cc(c1)OC(F)F)F)O               | C02390049 | -11.88 | -0.33 | -13.75 | 2.89  | -0.69 |
| 6240 | Cc1ccccn1=N=O                       | C03860654 | -11.88 | -1.11 | -11.62 | 3.68  | -2.83 |
| 6241 | c1ccc(c1Br)C=O                      | C04208980 | -11.88 | -2.55 | -12.42 | 5.25  | -2.17 |
| 6242 | CCCC[C@H](C#C)O                     | C04283778 | -11.88 | -1.92 | -10.37 | 2.21  | -1.81 |
| 6243 | Cc1cccc(n1)O                        | C12358764 | -11.88 | -2.66 | -14.6  | 4.92  | 0.47  |
| 6244 | Cn1c(ccn1)C#N                       | C12396642 | -11.88 | -2.37 | -11.64 | 4.07  | -1.95 |
| 6245 | C1C/C(=[NH+])C#N)NC1                | C13400701 | -11.88 | 2.27  | -16.78 | 6.44  | -3.81 |
| 6246 | c1c[nH]c2c1ncc(c2)C#N               | C14401082 | -11.88 | -1.34 | -14.97 | 6.85  | -2.42 |
| 6247 | C/C(=N/O)/C(F)F                     | C14628482 | -11.88 | -1.94 | -13.63 | 3.87  | -0.18 |
| 6248 | C1CC1c2nc(no2)CCl                   | C19090180 | -11.88 | 2.46  | -15.99 | 4.08  | -2.43 |
| 6249 | CSc1ccc(s1)C#N                      | C00165400 | -11.87 | -0.47 | -13.6  | 3.3   | -1.1  |
| 6250 | CC(=O)NCc1ccc(cc1)N                 | C00391625 | -11.87 | -0.38 | -19.84 | 6.26  | 2.08  |
| 6251 | CC(C)SC#N                           | C01690285 | -11.87 | 0.47  | -12.67 | 2.96  | -2.64 |
| 6252 | #CCOCC#N                            | C01732677 | -11.87 | -1.38 | -13.63 | 5.61  | -2.46 |
| 6253 | C(=NO)(C(=O)N)C(=O)N                | C01841944 | -11.87 | -5.67 | -17.23 | 7.02  | 4.01  |
| 6254 | c1cc(c(cc1Br)F)[N+](=O)[O-]         | C02387727 | -11.87 | -1.08 | -11.05 | 4.6   | -4.34 |
| 6255 | COC(=O)C(C(F)F)Cl(F)F               | C02530825 | -11.87 | -0.19 | -10.69 | 1.98  | -2.97 |
| 6256 | CCO[C@H](C)C=CO1                    | C03875718 | -11.87 | -0.18 | -11.07 | 2.34  | -2.96 |
| 6257 | CC(=O)NCC(=S)N                      | C05423714 | -11.87 | -2.2  | -16.54 | 4.43  | 2.44  |
| 6258 | c1c(ocnc1C(=O)N)CO                  | C06658124 | -11.87 | -4.27 | -17.8  | 7.24  | 2.96  |
| 6259 | CCCc1cc(n[nH]1)N                    | C12359877 | -11.87 | -2.31 | -12.1  | 4.15  | -1.61 |
| 6260 | CC(=N)[NH+]=C(N)SC)C                | C12620338 | -11.87 | -0.05 | -13.74 | 4.03  | -2.1  |
| 6261 | c1cnc2c(c1N=[N+]=[N-])n[nH]n2       | C17061572 | -11.87 | -5.87 | -13.47 | 6.52  | 0.95  |
| 6262 | CSc1c(nc([nH]c1=O)N)N               | C17106178 | -11.87 | -3.7  | -14.94 | 5.12  | 1.65  |
| 6263 | c1cnc(cc1N)Br                       | C19015174 | -11.87 | -0.35 | -14.48 | 3.91  | -0.95 |
| 6264 | CN(C)c1ccncc1                       | C19075763 | -11.87 | -1.3  | -11.56 | 3.47  | -2.48 |
| 6265 | C(=C/[O-])C(=O)C(F)F)F              | C20230759 | -11.87 | -0.37 | -15.33 | 5.55  | -1.72 |
| 6266 | C[C@H]1CC=NN1                       | C28224156 | -11.87 | -1.09 | -12.82 | 2.82  | -0.78 |
| 6267 | Cc1ccc(s1)C=O                       | C00152265 | -11.86 | -2.36 | -10.88 | 4.41  | -3.04 |
| 6268 | c1cc(c(nc1)Cl)[N+](=O)[O-]          | C00164421 | -11.86 | -1.75 | -14.14 | 6.84  | -2.81 |
| 6269 | C1=CC(=O)N(C1=O)C(=O)N              | C00207571 | -11.86 | -3.24 | -19.44 | 10.92 | -0.1  |
| 6270 | CSC(=C(C)Cl)Cl                      | C01603556 | -11.86 | -0.65 | -11.64 | 0.96  | -0.53 |
| 6271 | c1c(=O)[nH]cnn1                     | C02506112 | -11.86 | -4.12 | -15.61 | 7.87  | -0.01 |
| 6272 | c1cc(c(cc1F)F)C=N)O                 | C02507110 | -11.86 | -1.61 | -15.03 | 6.51  | -1.72 |
| 6273 | C(CN=C=O)CCl                        | C02539356 | -11.86 | -0.95 | -13.58 | 3.15  | -0.48 |
| 6274 | CCOC(=O)c1cnns1                     | C02571484 | -11.86 | 0.08  | -13.63 | 3.79  | -2.11 |
| 6275 | Cc1ccccc1CSC#N                      | C03848393 | -11.86 | -0.96 | -12.17 | 3.45  | -2.17 |
| 6276 | C=CCN(C=O)C(=O)NN                   | C04550592 | -11.86 | -1.24 | -20.38 | 4.78  | 4.98  |
| 6277 | c1c2c(c(=O)[nH]n1)CCC2              | C04625950 | -11.86 | 0.67  | -18.22 | 7.18  | -1.49 |
| 6278 | CCCN(C(=O)C)N=O                     | C05049226 | -11.86 | -0.27 | -12.94 | 2.77  | -1.42 |
| 6279 | c1ccc2c(c1)c(=O)nn[nH]2             | C08613136 | -11.86 | -2.8  | -14.54 | 6     | -0.52 |
| 6280 | CCOC(=O)c1cc(=O)[O-]                | C12398478 | -11.86 | 0.04  | -15.75 | 5.29  | -1.44 |
| 6281 | c1cnc1NC(=O)CCl                     | C12505051 | -11.86 | -3.17 | -14.08 | 7.47  | -2.09 |
| 6282 | c1cnc(c1)C=[N+](O)/[O-]             | C13213551 | -11.86 | 0.02  | -15.35 | 6.37  | -2.89 |
| 6283 | c1cc2c(cc1N)[nH]c(=O)[nH]2          | C18276088 | -11.86 | -4.45 | -14.42 | 6.57  | 0.45  |
| 6284 | C[C@H]1C(C1)S                       | C20476539 | -11.86 | -0.68 | -9.21  | 1.39  | -3.36 |
| 6285 | c1cc(cc(c1)F)C(=O)[H](C)Br)O        | C32914675 | -11.86 | -1.29 | -11.56 | 3.69  | -2.7  |
| 6286 | Cc1nc(cs1)C(=S)N                    | C00121471 | -11.85 | -2.84 | -14.78 | 7.19  | -1.42 |
| 6287 | c1c(c(c(c1F)F)C#N)F)F               | C00155260 | -11.85 | 1.85  | -13.63 | 3.97  | -4.04 |
| 6288 | c1cc2cncn2cc1N                      | C01705760 | -11.85 | -3.95 | -14.22 | 8.29  | -1.97 |
| 6289 | CCC[C@H]1[N+](=O)[O-]Cl             | C02042100 | -11.85 | -0.93 | -12.81 | 2.78  | -0.9  |
| 6290 | c1cc(oc1)C(=O)[C@H]2C=CC=[NH+]+2    | C02173476 | -11.85 | -0.2  | -16.96 | 6.4   | -1.09 |
| 6291 | c1cc(ccc1C#CCO)F                    | C02525748 | -11.85 | -2.4  | -12.09 | 4.95  | -2.31 |
| 6292 | CC(=O)OCCS                          | C04558439 | -11.85 | -0.91 | -14.09 | 5.03  | -0.87 |
| 6293 | C(C#N)SC(=[NH2+])N                  | C05112697 | -11.85 | -3.35 | -14.63 | 5.33  | 0.79  |
| 6294 | CCOCc1cccc1O                        | C05334404 | -11.85 | -0.05 | -15.68 | 3.3   | 0.58  |
| 6295 | C/N=C(/n1cncn1)S                    | C05412972 | -11.85 | -1.79 | -14.36 | 3.62  | 0.68  |
| 6296 | COC[C@H]1C(=C(C(=O)O1)Cl)Cl         | C05701326 | -11.85 | -1.5  | -13.77 | 4.09  | -0.67 |

|      |                              |           |        |       |        |       |       |
|------|------------------------------|-----------|--------|-------|--------|-------|-------|
| 6297 | c1cnn2c1NCCC2                | C12396623 | -11.85 | -3.13 | -12.32 | 5.37  | -1.77 |
| 6298 | c1cn(nn1)CC#N                | C12505475 | -11.85 | -1.42 | -17.65 | 9.11  | -1.9  |
| 6299 | C1C=NC(=CC1=O)Br             | C14982269 | -11.85 | 0.02  | -15.52 | 4.05  | -0.4  |
| 6300 | C=CCC(=O)c1cccc1             | C17719794 | -11.85 | 0.13  | -12.05 | 4.36  | -4.29 |
| 6301 | C(=N/C(=C(C#N)N)/C#N)N       | C22000648 | -11.85 | -4.09 | -14.39 | 6.68  | -0.05 |
| 6302 | C#C[C@H](c1cccc1)N           | C32501210 | -11.85 | -0.42 | -12.01 | 3.19  | -2.61 |
| 6303 | c1cc(c(cc1C#N)Cl)N           | C00157168 | -11.84 | -0.86 | -12.96 | 4.39  | -2.41 |
| 6304 | c1cc(oc1)OC(=O)c2ccco2       | C00240839 | -11.84 | 0.24  | -15.36 | 7.12  | -3.84 |
| 6305 | c1cccc1C1Br                  | C00331843 | -11.84 | -2.38 | -12.11 | 2.28  | 0.37  |
| 6306 | CC(C)OC(=O)CS                | C00395104 | -11.84 | -1.91 | -12.94 | 4.05  | -1.03 |
| 6307 | CCc1cnccc1C                  | C00967180 | -11.84 | -0.78 | -10.43 | 2.86  | -3.49 |
| 6308 | c1cnc(nc1Cl)Cl               | C01571020 | -11.84 | -2.68 | -11.23 | 4.22  | -2.15 |
| 6309 | CC[C@H](C)OC(=O)C(F)(F)F     | C01686418 | -11.84 | -0.73 | -9.54  | 1.85  | -3.42 |
| 6310 | Cc1ccn2c(c1)n[nH]c2=O        | C01696466 | -11.84 | -5.13 | -11.57 | 7.35  | -2.49 |
| 6311 | Cn1ccc(c1)C=O                | C02581754 | -11.84 | -2.35 | -14.58 | 8.03  | -2.94 |
| 6312 | C(=O)C(C(F)(F)Cl)(F)F        | C05287061 | -11.84 | -3.92 | -11.73 | 3.76  | 0.05  |
| 6313 | CC(=O)/C=C/c1cccc1           | C12370860 | -11.84 | -2.14 | -10.12 | 4.53  | -4.11 |
| 6314 | C1CSC(=[NH2+])N1             | C18354955 | -11.84 | -2.35 | -13.06 | 4.12  | -0.54 |
| 6315 | c1cc(nc(c1N=O)N)N            | C19944846 | -11.84 | -2.6  | -19.47 | 9.38  | 0.84  |
| 6316 | c1cccc(c1)NCC(F)(F)F         | C21794619 | -11.84 | -2.27 | -10.55 | 3.96  | -2.98 |
| 6317 | c1cc(c(cc1Cl)Cl)N            | C00157569 | -11.83 | -0.87 | -10.45 | 1.97  | -2.48 |
| 6318 | c1cc(c(nc1)[N+](=O)[O-])[O-] | C00331852 | -11.83 | -3.38 | -17.76 | 11.27 | -1.95 |
| 6319 | c1c(nc2c1[n+](on2)[O-])Br    | C01252138 | -11.83 | -2.07 | -13.58 | 7.25  | -3.43 |
| 6320 | COCCOC=C                     | C01577176 | -11.83 | -0.27 | -14.04 | 3.48  | -1    |
| 6321 | c1[nH]c2c(n1)c(nc(n2)F)N     | C01641355 | -11.83 | -4.56 | -13.97 | 7.91  | -1.21 |
| 6322 | CC[C@H](C=C)O                | C01692449 | -11.83 | -0.56 | -11.88 | 1.48  | -0.87 |
| 6323 | c1cc([nH]c1)C(=O)OCC#N       | C01721192 | -11.83 | 0.67  | -17.12 | 6.47  | -1.85 |
| 6324 | CC[C@H](C=C)O                | C02032295 | -11.83 | -0.14 | -13.33 | 1.51  | 0.13  |
| 6325 | c1cncc(c1C=O)Br              | C02559660 | -11.83 | -0.75 | -12.14 | 3.27  | -2.21 |
| 6326 | C1C[C@H](C)C=C1/C=C/C=C=O    | C04429376 | -11.83 | -1.78 | -10.55 | 4.81  | -4.31 |
| 6327 | C(=O)C(C(F)(F)F)F            | C05178393 | -11.83 | -0.16 | -11.67 | 1.29  | -1.29 |
| 6328 | C/C=C/C=C/N=O                | C08612527 | -11.83 | -1.41 | -12.71 | 3.72  | -1.42 |
| 6329 | COC/C(=C)SC#N)/Br            | C12432974 | -11.83 | -2.16 | -12.19 | 3.69  | -1.17 |
| 6330 | CC(=O)CSC#N                  | C16138990 | -11.83 | 0.33  | -15.77 | 5.74  | -2.13 |
| 6331 | CSc1nc(on1)N                 | C16939852 | -11.83 | -2.74 | -17.19 | 7.15  | 0.95  |
| 6332 | Cc1cnccc1NN                  | C19089984 | -11.83 | -2.18 | -12.72 | 3.97  | -0.9  |
| 6333 | c1cc(c(cc1OCCON)F)F          | C19727807 | -11.83 | -2.51 | -14.15 | 6.57  | -1.75 |
| 6334 | CC(=O)NCc1cccc1F             | C21269818 | -11.83 | 1.72  | -18.51 | 7.64  | -2.68 |
| 6335 | C1CC(=CC(=O)C1)Br            | C26895294 | -11.83 | -0.08 | -12.66 | 4.18  | -3.27 |
| 6336 | Cn1ccc(=[NH2+])cc1           | C00059393 | -11.82 | -3.07 | -13.89 | 7.84  | -2.69 |
| 6337 | CNC(=O)Cc1cccc1              | C00168784 | -11.82 | -4.91 | -11.34 | 6.95  | -2.52 |
| 6338 | C=C1CC(=O)O1                 | C01609482 | -11.82 | -1.57 | -13.13 | 5.2   | -2.32 |
| 6339 | C[C@H](C(=O)Cl)OC(=O)C       | C02516988 | -11.82 | 0.16  | -13.26 | 4.54  | -3.26 |
| 6340 | Cn1cc(c(n1)C(F)(F)F)N        | C02537831 | -11.82 | -3.35 | -12.86 | 5.39  | -1    |
| 6341 | CC(=O)SCCCC#N                | C02584630 | -11.82 | -2.5  | -12.69 | 6.81  | -3.43 |
| 6342 | c1c(cnc1Br)Cl                | C02599049 | -11.82 | -0.52 | -13    | 1.33  | 0.37  |
| 6343 | c1cc(oc1)CSC(F)F             | C03284957 | -11.82 | 0.8   | -14.06 | 3.61  | -2.17 |
| 6344 | CC/C(=C(C)C(=O)C)/O          | C03848380 | -11.82 | -1.9  | -11.06 | 3.86  | -2.72 |
| 6345 | C[C@H](C(F)(F)F)OC(=O)C      | C04290183 | -11.82 | 0.63  | -12.91 | 3.64  | -3.18 |
| 6346 | C(NN(C)=N[N+](=O)[O-])/N)O   | C06021264 | -11.82 | -3.46 | -19.51 | 6.25  | 4.91  |
| 6347 | Cc1cc(n[H]c(=O)c1            | C09638365 | -11.82 | -1.21 | -16.08 | 4.75  | 0.73  |
| 6348 | c1cc(nc(c1)Cl)O              | C12358726 | -11.82 | -1.74 | -16.04 | 5.29  | 0.67  |
| 6349 | COC(=O)c1ccnnc1              | C12359421 | -11.82 | 1.14  | -16.58 | 5.32  | -1.71 |
| 6350 | COC(=O)[C@H](C(F)(F)F)N      | C15442471 | -11.82 | -1.67 | -13.78 | 3.97  | -0.34 |
| 6351 | C(=O)[C@H](C(F)(F)F)Cl       | C16159145 | -11.82 | 0.33  | -10.57 | 0.73  | -2.31 |
| 6352 | CC/C=C/C=C=O                 | C20231660 | -11.82 | -1.1  | -12.41 | 5.18  | -3.49 |
| 6353 | CN1C(=O)C=C[C@H](C1=O)N      | C29786782 | -11.82 | -4.55 | -14.39 | 6.11  | 1     |
| 6354 | c1ccc(cc1)CCC(=O)N           | C00074758 | -11.81 | -1.33 | -15.91 | 7.28  | -1.85 |
| 6355 | c1cc(oc1)c2nsc(=O)o2         | C00076458 | -11.81 | 0.01  | -15.25 | 4.6   | -1.18 |
| 6356 | Cc1cc(ncc1)C                 | C00388629 | -11.81 | -1.62 | -11.27 | 3.98  | -2.9  |
| 6357 | Cn1cnc1C(=O)N                | C01401586 | -11.81 | -3.69 | -15.75 | 6.08  | 1.55  |
| 6358 | CC(C)OC=C                    | C01586530 | -11.81 | 0.16  | -10.55 | 1.5   | -2.92 |
| 6359 | CC/C=C/C#N                   | C02012972 | -11.81 | -1.14 | -11.53 | 3.94  | -3.08 |
| 6360 | CC(=O)OCC(F)F                | C02539797 | -11.81 | -1.72 | -13.07 | 5.59  | -2.61 |
| 6361 | c1cc(ccc1OCC(=O)Cl)F         | C02581492 | -11.81 | -3.52 | -12.03 | 5.52  | -1.78 |
| 6362 | COC(=O)CNC(=O)Cl             | C03270957 | -11.81 | -2.21 | -14.76 | 6.34  | -1.19 |
| 6363 | CC1=NN[C@H](C1)c2ccco2       | C04995369 | -11.81 | 0.18  | -14.3  | 4.58  | -2.26 |
| 6364 | C(C#N)c1c(n[H]n1)N           | C05072563 | -11.81 | -2.91 | -17.44 | 8.19  | 0.36  |
| 6365 | CNC(=S)Nc1nccn1C=O           | C05566432 | -11.81 | -0.48 | -17.94 | 5.66  | 0.95  |
| 6366 | CCc1cccn1                    | C11920572 | -11.81 | -0.17 | -12.58 | 4.02  | -3.08 |
| 6367 | Cn1c(c(cn1)C=O)N             | C12370882 | -11.81 | -4.95 | -15.04 | 8.96  | -0.77 |
| 6368 | Cc1c(c([nH]n1)N)N            | C12506145 | -11.81 | -3.25 | -11.39 | 3.75  | -0.92 |
| 6369 | C=CC[C@H](c1cccc(c1)F)O      | C15441108 | -11.81 | -1.02 | -10.71 | 3.19  | -3.27 |
| 6370 | c1cnccc1CCC=O                | C19682808 | -11.81 | -1.01 | -14.89 | 7.05  | -2.96 |
| 6371 | COCC1ncc(c(n1)Cl)F           | C32914840 | -11.81 | -1.6  | -12.36 | 3.73  | -1.58 |
| 6372 | N(C(=O)C)c1cccc1             | W2004A008 | -11.81 | -0.48 | -15.2  | 6.57  | -2.69 |
| 6373 | O=N(=O)c1ccc(O)cc1           | nphen1    | -11.81 | -1.43 | -14.19 | 5.45  | -1.64 |
| 6374 | CC(=O)Nc1ccc(cc1F)N          | C01574393 | -11.8  | -1.78 | -14.75 | 5.84  | -1.11 |
| 6375 | C1OC2=CC(=O)C(=O)C=C2O1      | C01592536 | -11.8  | -1.05 | -15.44 | 6.61  | -1.93 |
| 6376 | c1cc(ccc1/C=C/C#N)F          | C01624976 | -11.8  | -1.66 | -12.76 | 5.51  | -2.89 |
| 6377 | CC[C@H](C)[C][N+](=O)[O-]    | C01758976 | -11.8  | -0.73 | -11.86 | 3.74  | -2.96 |
| 6378 | c1cc(oc1)CSSC(=[NH2+])N      | C01764133 | -11.8  | -2.67 | -14.05 | 4.01  | 0.9   |
| 6379 | c1c(c(n1CC)[N+](=O)[O-])Cl   | C02536478 | -11.8  | -4.13 | -12.21 | 8.44  | -3.9  |
| 6380 | c1cc(cc(c1)O)/C=N/O          | C02573571 | -11.8  | -3.16 | -13.79 | 4.61  | 0.53  |
| 6381 | c1cc(sc1C(=O)C(F)(F)Cl       | C02579824 | -11.8  | -0.07 | -11.74 | 1.84  | -1.83 |
| 6382 | c1c(c(c2c(c1F)n[nH]n2)N)F    | C04714861 | -11.8  | -5.08 | -13.87 | 4.73  | 2.42  |
| 6383 | Cn1ccnnc1=[NH2+]             | C04934539 | -11.8  | -2.77 | -17.24 | 8.26  | -0.05 |
| 6384 | CC(=S)SC                     | C05167654 | -11.8  | -2.15 | -12.1  | 5.26  | -2.82 |
| 6385 | CC(=O)C1=C(OCC1)O            | C06293632 | -11.8  | -2.17 | -17.14 | 7.75  | -0.24 |
| 6386 | C1C(=O)OC(=O)CS1             | C08100926 | -11.8  | 0.75  | -16.96 | 7.17  | -2.76 |

|      |                                                  |           |        |       |        |       |       |
|------|--------------------------------------------------|-----------|--------|-------|--------|-------|-------|
| 6387 | c1cc(=O)[nH]c1C(F)(F)F                           | C08698270 | -11.8  | -2.27 | -13.91 | 4.06  | 0.34  |
| 6388 | c1cc(c(c1O)F)FBr                                 | C12359201 | -11.8  | -1.3  | -15.26 | 4.63  | 0.14  |
| 6389 | CCCc1nc(on1)[C@@H](C)Cl                          | C12760971 | -11.8  | 0.34  | -12.55 | 3.37  | -2.96 |
| 6390 | c1cc(c(c1C(F)(F)N)F)F                            | C15443439 | -11.8  | -2.78 | -8.71  | 2.44  | -2.74 |
| 6391 | c1nc([nH]n1)Scco                                 | C18039855 | -11.8  | -4.15 | -14.32 | 6.82  | -0.14 |
| 6392 | c1cc(ncn1)C=C/CO                                 | C22066196 | -11.8  | -1.69 | -15.39 | 6.07  | -0.79 |
| 6393 | [H]/N=C/1\C=C[C@H](S1)SCC                        | C31893621 | -11.8  | 0.18  | -13.37 | 4.03  | -2.64 |
| 6394 | c1csc(c1c(=O)N)N                                 | C00078193 | -11.79 | -2.6  | -15.71 | 5.46  | 1.06  |
| 6395 | CNC(=O)c1cccc1N                                  | C00294877 | -11.79 | -2.9  | -13.55 | 5.4   | -0.73 |
| 6396 | Cc1cc(c(=O)[nH]n1)N                              | C00391334 | -11.79 | -2.17 | -16.73 | 6.04  | 1.07  |
| 6397 | C=Cn1ccc(=O)[nH]c1=O                             | C01086359 | -11.79 | -2.38 | -16.7  | 8.25  | -0.96 |
| 6398 | c1c(nc(n1)N)N                                    | C01511101 | -11.79 | -2.62 | -14.94 | 5.29  | 0.48  |
| 6399 | C[C@]12[C@H](O1)C(=O)C=CC2=O                     | C01559087 | -11.79 | -1.91 | -14.63 | 4.34  | 0.41  |
| 6400 | c1cnn2c(c1N)nnn2                                 | C01703197 | -11.79 | -3.62 | -19.02 | 10.71 | 0.14  |
| 6401 | CC(=O)C(=O)Sc1cccc1                              | C01760963 | -11.79 | -1.61 | -13.41 | 4.2   | -0.97 |
| 6402 | CCSC(=O)C                                        | C01850956 | -11.79 | -0.64 | -13.16 | 2.71  | -0.71 |
| 6403 | CO[C@]@H](C(F)F)O                                | C02040620 | -11.79 | -2.91 | -11.68 | 2.47  | 0.32  |
| 6404 | c1cc(c(c1)Cl)F                                   | C02382265 | -11.79 | -0.58 | -15.79 | 4.4   | 0.17  |
| 6405 | Cc1c1ccc(n1)C(=O)Cl                              | C02521282 | -11.79 | -2.74 | -12.03 | 5.83  | -2.85 |
| 6406 | c1cc(ccc1N)OCC(F)F                               | C02555218 | -11.79 | -3.79 | -9.53  | 3.91  | -2.37 |
| 6407 | c1c([nH]cn1)C(=S)[S-]                            | C02557033 | -11.79 | -3.31 | -12.65 | 6.66  | -2.48 |
| 6408 | c1ccc(c1)CC=OCl                                  | C02581070 | -11.79 | -2.33 | -8.88  | 3.48  | -4.06 |
| 6409 | C/C(=C/C(=O)c1cccc1O)/[O-]                       | C05114151 | -11.79 | -3.81 | -12.95 | 7.52  | -2.55 |
| 6410 | CC(=O)C1=NCCS1                                   | C05159440 | -11.79 | 1.09  | -17.03 | 5.12  | -0.98 |
| 6411 | c1c(nc([nH]1)C(=O)N)C(=O)N                       | C05595900 | -11.79 | -9.87 | -16.77 | 10.72 | 4.14  |
| 6412 | CCc1cc([nH]1)C(F)F                               | C12395948 | -11.79 | -2.76 | -12.04 | 4.07  | -1.06 |
| 6413 | CCNc1nccc(n1)Cl                                  | C21303232 | -11.79 | 0.24  | -13    | 4.3   | -3.32 |
| 6414 | c1ccc(cc1)Cn2c(ccn2)C=O                          | C22005383 | -11.79 | -1.29 | -12.28 | 6.29  | -4.5  |
| 6415 | C1CCc2c(c([nH][nH+]2)N)C1                        | C25949884 | -11.79 | -3.18 | -13.47 | 6.36  | -1.5  |
| 6416 | CC(=O)[C@]@H](C@]@H](C@H]1c2cccc2                | C32005632 | -11.79 | 1.11  | -13.78 | 4.96  | -4.09 |
| 6417 | CCOc1ccc(cn1)C#N                                 | C00166500 | -11.78 | -1.94 | -13.01 | 4.28  | -1.11 |
| 6418 | Cc1c(c(s1)N)C#N                                  | C01414956 | -11.78 | -4.19 | -11.53 | 4.63  | -0.68 |
| 6419 | CC(=O)N(C)CC#C                                   | C01669329 | -11.78 | -0.17 | -16.1  | 6.92  | -2.43 |
| 6420 | c1c(c(ncn1)N)CO                                  | C03650210 | -11.78 | -2.69 | -17.95 | 7.93  | 0.94  |
| 6421 | c1cc2c(cc1C#N)nc[nH]2                            | C04353499 | -11.78 | -2.2  | -14.18 | 7.99  | -3.39 |
| 6422 | c1csc2c1[nH]c(c2)CO                              | C04967342 | -11.78 | -2.71 | -14.71 | 6.25  | -0.62 |
| 6423 | c1c(nc(n1)CC(F)F)[N+]=[O-]                       | C12395040 | -11.78 | -3.12 | -13.75 | 8.39  | -3.29 |
| 6424 | c1cc(c(=O)[nH]c1)C#N                             | C12471465 | -11.78 | -0.33 | -18.97 | 6.85  | 0.67  |
| 6425 | CCc1nc(on1)CCl                                   | C12505491 | -11.78 | -0.98 | -13.44 | 4.41  | -1.76 |
| 6426 | CC(=O)c1c2ccccc2[nH]n1                           | C16696733 | -11.78 | -2.74 | -14.11 | 7.87  | -2.81 |
| 6427 | CC(=O)O/N=C1/CCOC1=O                             | C17164764 | -11.78 | -0.21 | -18.27 | 10.2  | -3.5  |
| 6428 | c1[n-jc2c(n1)nnnc2N(=N+)=N-]                     | C17376063 | -11.78 | 0.33  | -20.96 | 9.08  | -0.23 |
| 6429 | c1cc(oc1)c2nc(cc2)C=O                            | C19723038 | -11.78 | 0.91  | -18.78 | 6.8   | -0.72 |
| 6430 | c1(nc2n1)[C@H](N=N2)N)N                          | C19798285 | -11.78 | -0.61 | -19.19 | 7.61  | 0.41  |
| 6431 | CCSCC#N                                          | C19870197 | -11.78 | -1.35 | -12.9  | 5.43  | -2.96 |
| 6432 | CNc1cc(cc1)F                                     | C20054574 | -11.78 | -2.01 | -9.96  | 2.88  | -2.7  |
| 6433 | C1[C@H]([C@@H]1C(=O)C=[N+]=[N-])C(=O)C=[N+]=[N-] | C32105329 | -11.78 | -0.79 | -18.81 | 8.51  | -0.7  |
| 6434 | c1cc(c(cc1/C=N/O)Cl)F                            | C00106511 | -11.77 | -3.42 | -11.59 | 5.36  | -2.12 |
| 6435 | CCOCCOCC(=O)Cl                                   | C01845903 | -11.77 | -1.38 | -12.57 | 3.17  | -0.99 |
| 6436 | c1(c(c(nc1)Cl)F)F)Cl)F                           | C01850900 | -11.77 | 0.35  | -9.78  | 0.43  | -2.77 |
| 6437 | Cc1cc(nc1)[O-]                                   | C02030961 | -11.77 | -2.82 | -15.9  | 7.51  | -0.55 |
| 6438 | CC/C=C/1/CCOC1=O                                 | C02034940 | -11.77 | -0.83 | -13.61 | 6.22  | -3.56 |
| 6439 | c1ccc(cc1)COCCl                                  | C02242621 | -11.77 | -1.36 | -13.18 | 3.13  | -0.36 |
| 6440 | CCOC(=O)C(C(F)F)Cl)F                             | C02525771 | -11.77 | 0.28  | -10    | 1.7   | -3.75 |
| 6441 | Cc1cc([nH]n1)CO                                  | C03851840 | -11.77 | -4.42 | -13.52 | 5.38  | 0.78  |
| 6442 | [C@@](C(F)F)C1(OC(F)F)F)Cl                       | C04329297 | -11.77 | 0.28  | -9.56  | 0.16  | -2.64 |
| 6443 | C#CCOc1cccc1)C=O                                 | C04487618 | -11.77 | -3.01 | -13.6  | 8.64  | -3.8  |
| 6444 | [H]/N=C/1/CCCS1                                  | C04521976 | -11.77 | -0.75 | -12.59 | 3.1   | -1.53 |
| 6445 | c1(c(nsn1)Cl)Cl                                  | C04529131 | -11.77 | -1.64 | -13.6  | 1.7   | 1.77  |
| 6446 | CCOC(=S)C                                        | C05224467 | -11.77 | -0.87 | -11.88 | 3.32  | -2.34 |
| 6447 | c1c([nH]c2c1c(ccn2)N                             | C14401132 | -11.77 | -3.32 | -14.77 | 7.53  | -1.23 |
| 6448 | Cc1cccc(c1)OC(F)F                                | C14592876 | -11.77 | -0.26 | -9.72  | 1.94  | -3.73 |
| 6449 | [H]/N=C(N)/NSC#N                                 | C14989407 | -11.77 | -4.96 | -14.91 | 8.7   | -0.61 |
| 6450 | C[C@]@H]1CNC(=NC1=O)N                            | C17313113 | -11.77 | -5    | -13.64 | 6.67  | 0.21  |
| 6451 | c1nc2c(ncn2[O-])nn1                              | C17380717 | -11.77 | -2.05 | -17.82 | 6.92  | 1.17  |
| 6452 | c1cc(ccc1O)[C@]@H]1C(=O)C(=O)N)F                 | C19480106 | -11.77 | 0.92  | -20.03 | 8.71  | -1.37 |
| 6453 | CC(=O)c1ccnc1N                                   | C20357579 | -11.77 | 1.12  | -16.95 | 5.11  | -1.05 |
| 6454 | c1cc(ccc1)Cl)N                                   | C00085247 | -11.76 | -1.59 | -11.24 | 2.92  | -1.86 |
| 6455 | Cc1c(nc(=O)[nH]c1)F                              | C00333479 | -11.76 | -4.68 | -16.75 | 8.54  | 1.13  |
| 6456 | Cc1cccc1C(=O)C                                   | C01081110 | -11.76 | 1.08  | -13.57 | 4.3   | -3.57 |
| 6457 | CC(O)C(=O)C(F)F                                  | C01675528 | -11.76 | 0.34  | -11.43 | 2.16  | -2.83 |
| 6458 | C/C(=C/Br)/CO                                    | C01683065 | -11.76 | -1.57 | -13.44 | 2.02  | 1.22  |
| 6459 | C[C@H](C(=O)OC)Cl                                | C02017921 | -11.76 | -0.59 | -12    | 3.48  | -2.64 |
| 6460 | CCC(=O)CBr                                       | C02030997 | -11.76 | -1.2  | -12.45 | 4.56  | -2.67 |
| 6461 | c1cnc(c1)C(=O)CBr                                | C02546217 | -11.76 | 0.65  | -16.2  | 5.48  | -1.69 |
| 6462 | Cc1ccc(c(c1N)OC)F                                | C02558532 | -11.76 | -1.28 | -14.4  | 4.43  | -0.51 |
| 6463 | c1cc(c(nc1)[N+]=[O-])Cl                          | C02566375 | -11.76 | -3.35 | -13.77 | 9.03  | -3.66 |
| 6464 | C(COC1c(non1)N)O                                 | C02566452 | -11.76 | -3.89 | -17.89 | 6.74  | 3.29  |
| 6465 | c1ccc(cc1)[C@]@H](CC#N)O                         | C02566594 | -11.76 | -3.33 | -14.95 | 6.83  | -0.31 |
| 6466 | CO[C@H]1C=C[C@]@H](O1)OC                         | C03860392 | -11.76 | -2.4  | -11.59 | 3.29  | -1.07 |
| 6467 | C1COC(=O)N1C(=O)CCl                              | C04207427 | -11.76 | 0.67  | -17.24 | 6.21  | -1.41 |
| 6468 | CCc1cc([nH]1)O                                   | C04494836 | -11.76 | -2.91 | -15.16 | 4.65  | 1.66  |
| 6469 | c1ccc2c(c1)CNC(=NH+)2                            | C05517570 | -11.76 | -0.49 | -13.94 | 5.76  | -3.09 |
| 6470 | CC[C@]@H](CC#C)O                                 | C08737734 | -11.76 | 0.6   | -13.84 | 3.61  | -2.13 |
| 6471 | CN(/C(=N)/[N+]=[O-])O]/[NH-])N=O                 | C13527713 | -11.76 | -6.14 | -16.94 | 12.92 | -1.59 |
| 6472 | C/C=C/C)C=N/O                                    | C14590619 | -11.76 | -0.86 | -13.72 | 2.09  | -1.28 |
| 6473 | c1cc(c(cc1C(F)F)F)O)Br                           | C14989337 | -11.76 | -3.08 | -8.77  | 4.59  | -2.5  |
| 6474 | CCc1c([nH]c(=S)nn1)[O-]                          | C16887340 | -11.76 | -5.11 | -12.9  | 5.02  | 1.22  |
| 6475 | CCSc1nccc(n1)N                                   | C19093154 | -11.76 | -0.22 | -12.76 | 4.82  | -3.6  |
| 6476 | C[C@H](C(=O)C(F)F)N                              | C20285513 | -11.76 | -1.2  | -13.8  | 3.44  | -0.19 |

|      |                               |           |        |       |        |       |       |
|------|-------------------------------|-----------|--------|-------|--------|-------|-------|
| 6477 | Cc1cc(c([nH+]c1)Br)[O-]       | C21981894 | -11.76 | -2.85 | -11.61 | 3.68  | -0.98 |
| 6478 | c1c(c(ncn1)NCC(F)(F)F)N       | C26475074 | -11.76 | -2.25 | -13.44 | 5.65  | -1.73 |
| 6479 | c1cc(cnc1)C(=O)CBr            | C00158589 | -11.75 | 0.3   | -14.59 | 5.54  | -2.99 |
| 6480 | COC(=O)c1ccc[nH]1             | C00165735 | -11.75 | -0.69 | -14.22 | 5.51  | -2.35 |
| 6481 | CC(=CCO)C                     | C00897129 | -11.75 | -1.47 | -12.15 | 2.41  | -0.54 |
| 6482 | Cc1c(cccn1)Br                 | C00966625 | -11.75 | -0.33 | -11.14 | 2.64  | -2.92 |
| 6483 | c1enn(c1N)CCO                 | C01559503 | -11.75 | -1.42 | -16.3  | 5.11  | 0.86  |
| 6484 | CCO[C@H](C(F)(F)F)O           | C01692441 | -11.75 | -1.36 | -12.19 | 2.37  | -0.57 |
| 6485 | Cc1ccc(cc1)[N+](=O)[O-]       | C01700067 | -11.75 | -1.97 | -10.48 | 5.06  | -4.36 |
| 6486 | c1c(cnn2c1nnc2)N              | C01730470 | -11.75 | -5.01 | -20.82 | 13.2  | 0.88  |
| 6487 | Cc1cc[nH]c1C                  | C01845997 | -11.75 | -1.09 | -12.81 | 2.72  | -0.57 |
| 6488 | Cc1c(noc1C)C                  | C02023198 | -11.75 | -1.45 | -11.46 | 4.25  | -3.09 |
| 6489 | CC(C)Nc1ccccc1                | C02031136 | -11.75 | -1.42 | -8.22  | 1.64  | -3.75 |
| 6490 | COCCN=C=S                     | C02168500 | -11.75 | 0.77  | -14.8  | 2.99  | -0.72 |
| 6491 | c1c(ocn1Br)CO                 | C02523038 | -11.75 | -2.27 | -14.96 | 5.29  | 0.19  |
| 6492 | CNC(=O)C@H](F)I               | C02525279 | -11.75 | -1.21 | -13.76 | 4.23  | -1.02 |
| 6493 | Cc1cc(ncc1Cl)F                | C02539940 | -11.75 | -0.76 | -11.01 | 2.78  | -2.76 |
| 6494 | c1cc(ccc1[N+](=O)[O-])OC(F)F  | C04255174 | -11.75 | -4.21 | -11.29 | 5.87  | -2.13 |
| 6495 | C1CC=C(C1)C=O                 | C05133539 | -11.75 | -0.04 | -15.57 | 4.86  | -1.01 |
| 6496 | C=C(c1ccccc1)Br               | C08700557 | -11.75 | -1.27 | -9.9   | 2.95  | -3.54 |
| 6497 | c1c(sc(n1)N)C(=O)N            | C10037209 | -11.75 | -3.05 | -18.15 | 7.6   | 1.85  |
| 6498 | C(C(=O)Cl)C(F)F               | C12953050 | -11.75 | 0.47  | -14.38 | 4.39  | -2.24 |
| 6499 | CN1C[C@H](CC1=O)N=C=O         | C19732303 | -11.75 | -0.59 | -18.04 | 6.28  | 0.6   |
| 6500 | c1cc(c(nc1)N)C(=O)N           | C19770044 | -11.75 | -3.14 | -17.89 | 7.94  | 1.35  |
| 6501 | c1nc(on1)C=O                  | C20443635 | -11.75 | -1.48 | -15.93 | 5.85  | -0.2  |
| 6502 | c1cc(c(c1N)CC(=O)F)F          | C21985443 | -11.75 | -1.22 | -13.69 | 5.43  | -2.27 |
| 6503 | CCc1ccc(cc1N)C(F)F            | C21987767 | -11.75 | -3.42 | -9.19  | 4.25  | -3.39 |
| 6504 | c1cc2c(cc1N)scn2              | C00332484 | -11.74 | -3.07 | -13.09 | 5.72  | -1.3  |
| 6505 | c1cc(ccc1[N+](=O)[O-])OC=O    | C01564798 | -11.74 | -2.18 | -14.46 | 8.9   | -4    |
| 6506 | c1ccc(cc1)CNC(=O)CO           | C01633995 | -11.74 | -0.08 | -19.81 | 9.12  | -0.97 |
| 6507 | CNC(=O)C1CSn1                 | C01709779 | -11.74 | -1.09 | -16.24 | 5.21  | 0.37  |
| 6508 | C(C=C(C#N)C)C#N               | C01718503 | -11.74 | -2.01 | -16.59 | 10.32 | -3.46 |
| 6509 | C/C=C(\C)/CCO                 | C01995217 | -11.74 | -1.99 | -11.61 | 2.97  | -1.11 |
| 6510 | CC(=O)OCC(C(C(F)(F)F)F)F(F)F  | C02572311 | -11.74 | -1.56 | -8.79  | 3.68  | -5.07 |
| 6511 | C1SCS1                        | C03860808 | -11.74 | -0.04 | -10.77 | 2.08  | -3.01 |
| 6512 | C(C(=O)Cl)Cl                  | C03860850 | -11.74 | 0.13  | -13.59 | 3.53  | -1.82 |
| 6513 | c1cc(oc1)C(=O)NO              | C04522246 | -11.74 | -4.69 | -16.03 | 8.77  | 0.21  |
| 6514 | c1[n-]c(c(n1)[N+](=O)[O-])I   | C13207567 | -11.74 | -3.36 | -11.98 | 7.1   | -3.49 |
| 6515 | CNC(=O)c1ccc(c(c1)F)F         | C16649315 | -11.74 | -2.58 | -15.07 | 8.04  | -2.14 |
| 6516 | CCCOC(=O)CS                   | C16678202 | -11.74 | -1.76 | -10.88 | 4     | -3.1  |
| 6517 | c1cc(cnc1)CNn2cnnc2           | C20879680 | -11.74 | -2.49 | -14.25 | 8.91  | -3.91 |
| 6518 | CCN(C)C(=O)Cl                 | C21992762 | -11.74 | -0.73 | -13.35 | 4.12  | -1.79 |
| 6519 | CC(=CC(=O)OC)C                | C00388580 | -11.73 | 2.11  | -14.15 | 3.42  | -3.1  |
| 6520 | c1cc(ccc1[N+](=O)[O-])SC#N    | C01095295 | -11.73 | -3.06 | -13.25 | 6.62  | -2.04 |
| 6521 | CCCC(=O)OCC=C                 | C01561518 | -11.73 | -0.17 | -10.89 | 3.27  | -3.94 |
| 6522 | COc1cc(ccn1)F                 | C01584800 | -11.73 | -0.82 | -12.67 | 2.91  | -1.15 |
| 6523 | CCSC(=S)S                     | C01627213 | -11.73 | -1.81 | -10.38 | 3.45  | -2.99 |
| 6524 | Cc1nnc(o1)Nc2ccccc2           | C01639044 | -11.73 | 1.18  | -19    | 6.83  | -0.74 |
| 6525 | Cc1cccc(c1)OC                 | C01693360 | -11.73 | -1.23 | -9.73  | 2.65  | -3.42 |
| 6526 | c1ccnc(c1)C(F)F               | C01695077 | -11.73 | 1.29  | -16.03 | 4.28  | -1.26 |
| 6527 | c1ccc(cc1)CCCO                | C01747839 | -11.73 | -1.49 | -12.29 | 4.32  | -2.26 |
| 6528 | Cc1ccc(c(n1)F)N               | C02384073 | -11.73 | -2.56 | -14.95 | 5.16  | 0.62  |
| 6529 | c1cc2c(nc1)onc2Cl             | C03852480 | -11.73 | 0.98  | -18.35 | 6.6   | -0.96 |
| 6530 | Cc1c(ncnc1Cl)N                | C03881110 | -11.73 | -3.52 | -10.15 | 3.21  | -1.26 |
| 6531 | c1csc(n1)CO                   | C04277257 | -11.73 | -3.58 | -13.99 | 5.21  | 0.62  |
| 6532 | C(#N)C(=N[O-])C(=[NH2+])N[O-] | C04557733 | -11.73 | -5.15 | -15.44 | 6.75  | 2.1   |
| 6533 | C/C=C[C@H](CC=C)O             | C04582346 | -11.73 | -0.3  | -13.16 | 1.68  | 0.05  |
| 6534 | CO/C=C\OC                     | C04712486 | -11.73 | -0.92 | -13.63 | 3.97  | -1.15 |
| 6535 | c1cc(c(cc1)C(=N(O))N)F)F      | C06862846 | -11.73 | -3.13 | -13.33 | 4.44  | 0.29  |
| 6536 | C(#N)[C@H](F)I                | C08698380 | -11.73 | -0.21 | -12.38 | 3.22  | -2.37 |
| 6537 | c1cc(oc1)C=C(C(=O)N           | C16892204 | -11.73 | 0.05  | -18.13 | 7.75  | -1.4  |
| 6538 | C=CCSc1nnc(s1)N               | C17173788 | -11.73 | -1.36 | -10.63 | 2.34  | -2.08 |
| 6539 | c1cc(sc1)[C@H]2CO2            | C19257652 | -11.73 | -1.78 | -12.69 | 4.66  | -1.92 |
| 6540 | c1c(cc(c1F)F)GNN              | C19264805 | -11.73 | 0.76  | -13.17 | 2.13  | -1.44 |
| 6541 | c1c(cn1)CC#N)N                | C19810571 | -11.73 | -2.24 | -18.68 | 9.81  | -0.62 |
| 6542 | c1[nH]nc(n1)C(=N(O))N         | C22146424 | -11.73 | -5.82 | -19.67 | 12.71 | 1.05  |
| 6543 | c1cc(ccc1CO)SC(F)F            | C32627931 | -11.73 | -2.02 | -13.08 | 5.69  | -2.32 |
| 6544 | Cc1cc(not1)C(=S)N             | C00166485 | -11.72 | -1.27 | -15.54 | 6.66  | -1.58 |
| 6545 | COc1OCCCO1                    | C01590518 | -11.72 | -1.2  | -12.99 | 3.47  | -1    |
| 6546 | CN(C)C(=O)OCC=C               | C01615454 | -11.72 | -2.06 | -11.89 | 4.54  | -2.32 |
| 6547 | c1ccc(cc1)Cc2[nH]cnc2         | C01678932 | -11.72 | 0.15  | -17.82 | 5.97  | -0.02 |
| 6548 | COC(=O)NCC=C                  | C01716624 | -11.72 | -0.61 | -14.89 | 4.34  | -0.55 |
| 6549 | COC(=O)C[N+](=O)[O-]          | C01733869 | -11.72 | -1.66 | -15.42 | 7.58  | -2.22 |
| 6550 | CCCCC(=O)Cl                   | C01847704 | -11.72 | -0.24 | -12.87 | 2.62  | -1.23 |
| 6551 | CC(=CCCCO)C                   | C02539466 | -11.72 | -1.84 | -12.55 | 1.99  | 0.68  |
| 6552 | CCc1c[nH]nc1C                 | C03848357 | -11.72 | -2.64 | -10.82 | 3.93  | -2.19 |
| 6553 | CO[C@H]1CCC=CO1               | C03861322 | -11.72 | -0.58 | -11.31 | 2.37  | -2.2  |
| 6554 | CC/C=N/C(C)                   | C05663759 | -11.72 | -1.55 | -11.49 | 2.79  | -1.47 |
| 6555 | CO[C@H](C(F)(F)F)F            | C08698306 | -11.72 | -1.28 | -11.78 | 2.64  | -1.29 |
| 6556 | CS/C(=N/C#N)/NCC=C            | C13142991 | -11.72 | 0.17  | -11.79 | 3.1   | -3.2  |
| 6557 | c1c(c(cnc1Cl)[N+](=O)[O-])Cl  | C15021894 | -11.72 | -0.18 | -11.14 | 2.78  | -3.18 |
| 6558 | c1ccc(c(c1)CNCC(F)F)F)F       | C19517343 | -11.72 | 0.3   | -11.87 | 3.26  | -3.42 |
| 6559 | c1c(c(c(c(n1)N)F)C(F)F)N      | C19735234 | -11.72 | -0.01 | -16.76 | 5.3   | -0.24 |
| 6560 | C=C1CCCC1=O                   | C21982784 | -11.72 | 1.78  | -13.97 | 3.72  | -3.25 |
| 6561 | c1c(nc[nH]1)C#N               | C26898378 | -11.72 | -6.28 | -13.75 | 10.21 | -1.9  |
| 6562 | c1ccc(c1CS)Cl                 | C00404320 | -11.71 | -1.64 | -11.79 | 1.94  | -0.21 |
| 6563 | Cc1ccc([nH]1)C=O              | C01574403 | -11.71 | -1.65 | -15.57 | 5.95  | -0.44 |
| 6564 | CCCCSC#N                      | C01576854 | -11.71 | 0.11  | -12.56 | 2.8   | -2.05 |
| 6565 | COc1c2c(ncn1)scn2             | C01699131 | -11.71 | -1.01 | -17.04 | 4.8   | 1.54  |
| 6566 | c1cc(c(c1)Br)OO               | C02019194 | -11.71 | -1.37 | -14.52 | 4.46  | -0.27 |



|      |                                    |           |        |       |        |       |       |
|------|------------------------------------|-----------|--------|-------|--------|-------|-------|
| 6567 | C1COC(O1)CCBr                      | C02242714 | -11.71 | -0.66 | -11.77 | 2.68  | -1.96 |
| 6568 | c1cc(c(cc1F)F)C(=O)C=O             | C02524869 | -11.71 | -0.78 | -18.99 | 11.99 | -3.93 |
| 6569 | C(CCBr)CC#N                        | C03860244 | -11.71 | -2.31 | -11.26 | 5.55  | -3.69 |
| 6570 | c1nc(c(c(n1)C)[N+](=O)[O-])N       | C03866077 | -11.71 | -1.88 | -12.02 | 4.13  | -1.93 |
| 6571 | C1COC(=O)C=C1                      | C04521393 | -11.71 | -1.43 | -15.19 | 7.24  | -2.33 |
| 6572 | Cc1cc(on1)COC                      | C05793354 | -11.71 | -2.52 | -12.73 | 4.82  | -1.28 |
| 6573 | C(=C)[N+](=O)[O-]C(F)F             | C08579998 | -11.71 | -1.05 | -15.42 | 7.55  | -2.8  |
| 6574 | COC(=O)Cn1ccn1                     | C12395003 | -11.71 | -1.52 | -16.82 | 9.23  | -2.6  |
| 6575 | Cc1cnc(s1)[N+](=O)[O-]             | C15783909 | -11.71 | -2.62 | -13.22 | 7.62  | -3.48 |
| 6576 | c1ccc2c(c1)ncn2N                   | C15882019 | -11.71 | -2.31 | -12.83 | 6.39  | -2.96 |
| 6577 | Cc1c(ccc(c1F)[N+](=O)[O-])F        | C32914723 | -11.71 | -1.3  | -10.98 | 4.95  | -4.37 |
| 6578 | C1C[C@]@H](OC1)CCl                 | C01641196 | -11.7  | 1.37  | -13.24 | 2.52  | -2.35 |
| 6579 | c1ccc(cc1)C(=O)CCl                 | C01673519 | -11.7  | 1.15  | -14.38 | 5.76  | -4.23 |
| 6580 | C=CC(=C)[O-]                       | C01680420 | -11.7  | -1.49 | -13.03 | 3.2   | -0.38 |
| 6581 | Cc1cc(c(nc1)Cl)N                   | C02585529 | -11.7  | -3.37 | -10.85 | 3.93  | -1.42 |
| 6582 | c1cn(cn1)c2nc[nH]n2                | C05819380 | -11.7  | -1.05 | -11.63 | 5.81  | -4.82 |
| 6583 | c1c(cc(c2c1[nH]nc2)F)Cl            | C14984002 | -11.7  | 0.96  | -12.7  | 2.8   | -2.77 |
| 6584 | C[C@]@H](c1cnnc1)[NH3+]            | C20441652 | -11.7  | -1.62 | -12.7  | 3.34  | -0.72 |
| 6585 | c1cc[n+](cc1)c2c(c(=O)c2=O)[O-]    | C26329912 | -11.7  | -0.56 | -17.27 | 9.71  | -3.58 |
| 6586 | CCc1c(c(no1)C)N                    | C26441268 | -11.7  | -2.3  | -12.98 | 5.25  | -1.67 |
| 6587 | c1cc(c(c1)O)F                      | C26892777 | -11.7  | 0.2   | -13.15 | 3.6   | -2.35 |
| 6588 | COC(=O)c1ccc1                      | C00388192 | -11.69 | 0.24  | -14.53 | 5.13  | -2.53 |
| 6589 | C(CBr)NC(=O)C(F)F                  | C01601783 | -11.69 | -1.4  | -14.41 | 4.32  | -0.21 |
| 6590 | Cc1ccn2cncn2c1                     | C01696467 | -11.69 | -2.56 | -13.92 | 9.71  | -4.92 |
| 6591 | CC[C@]@H](C@]@H)(C(O)[N+](=O)[O-]) | C01759010 | -11.69 | -0.69 | -13.73 | 3.9   | -1.16 |
| 6592 | COCC=C                             | C01845913 | -11.69 | -0.52 | -11.34 | 1.47  | -1.31 |
| 6593 | c1ccc(cc1)CSC(=S)N                 | C02003005 | -11.69 | -2.22 | -12.86 | 7.01  | -3.61 |
| 6594 | c1cnc([nH]1)CO                     | C02509361 | -11.69 | -3.08 | -14.69 | 5.31  | 0.77  |
| 6595 | Cc1c(cco1)C(=O)Cl                  | C02521278 | -11.69 | -2.49 | -9.89  | 3.42  | -2.74 |
| 6596 | c1ccc(c(c1)O)OC(F)F                | C02560218 | -11.69 | -1.57 | -12.82 | 3.63  | -0.93 |
| 6597 | c1cc(c(cc1)O)C#N                   | C02581327 | -11.69 | 1.07  | -19.99 | 6.27  | 0.97  |
| 6598 | c1cnc(cn1)C(=O)N=C(N)N             | C06119119 | -11.69 | 1.97  | -24.8  | 10.77 | 0.38  |
| 6599 | c1cc(=O)[nH]cc1C=O                 | C08698108 | -11.69 | -3.09 | -16.68 | 6.73  | 1.35  |
| 6600 | C1=NC2=NC(=O)NC(=O)C2=N1           | C12493517 | -11.69 | -3.49 | -16.37 | 7.17  | 1.01  |
| 6601 | C[C@H]1CC(=NO1)[N+](=O)[O-]        | C15783915 | -11.69 | -1.79 | -11.75 | 4.79  | -2.95 |
| 6602 | Cc1ccc(cc1)C(=N/O)N/F              | C15922637 | -11.69 | -4.11 | -9.91  | 3.92  | -1.59 |
| 6603 | Cc1cnc(c1)C=O                      | C20443799 | -11.69 | -3.18 | -12.62 | 5.05  | -0.93 |
| 6604 | CC(=O)C[NH2+]c1ccccc1              | C26439299 | -11.69 | -2.16 | -10.9  | 4.62  | -3.24 |
| 6605 | Cc1c(c([nH]n1)N)[N+](=O)[O-]       | C32107407 | -11.69 | -4.35 | -14.73 | 8.19  | -0.8  |
| 6606 | CCN1ccc(=N)cc1                     | C00059392 | -11.68 | -2.8  | -13.13 | 7.55  | -3.3  |
| 6607 | c1cc(c2cc[nH]c2)N1                 | C00153904 | -11.68 | -0.89 | -13.24 | 4.25  | -1.8  |
| 6608 | c1cc(cc1)C@]@H](C#CBr)O            | C01304685 | -11.68 | -0.07 | -15.03 | 2.88  | 0.53  |
| 6609 | c1c(c([nH]1)C(F)F)C#N              | C01396895 | -11.68 | -0.18 | -14.86 | 4.88  | -1.52 |
| 6610 | c1ccc2c(c1)occc2                   | C01684620 | -11.68 | -2.24 | -16.17 | 8.84  | -2.11 |
| 6611 | CCC(=O)Cl                          | C01730995 | -11.68 | -0.66 | -11.86 | 2.78  | -1.94 |
| 6612 | C(NC(=O)N)OC(=S)S                  | C01733729 | -11.68 | -2    | -18.81 | 6.66  | 2.46  |
| 6613 | C#CCSP(=O)(O)O                     | C01755932 | -11.68 | -6.96 | -11.45 | 10.93 | -4.2  |
| 6614 | Cc1ccsc1C(=O)Cl                    | C02504559 | -11.68 | 1.82  | -16.55 | 3.61  | -0.55 |
| 6615 | c1c(ocn1)C=O                       | C02577850 | -11.68 | -2.48 | -15.67 | 5.82  | 0.65  |
| 6616 | Cc1ccn(c1)N                        | C02581942 | -11.68 | -3.39 | -14.56 | 4.69  | 1.58  |
| 6617 | c1cc(sc1)C(=O)C(O)O                | C03051942 | -11.68 | -1.92 | -16.4  | 6.31  | 0.33  |
| 6618 | C/(C(=NH+)/N)/N)Cl                 | C04203873 | -11.68 | -3.56 | -12.58 | 4.26  | 0.2   |
| 6619 | CSC1=NCCS1                         | C04276728 | -11.68 | -0.45 | -12.92 | 2.94  | -1.25 |
| 6620 | CNC(=S)NC(=S)N                     | C05187302 | -11.68 | -2.86 | -15.36 | 3.56  | 2.98  |
| 6621 | c1c2c(=O)[nH]c(nc2n[nH]1)N         | C08579359 | -11.68 | -4.08 | -16.04 | 6.47  | 1.98  |
| 6622 | CCc1cc(ccn1)Cl                     | C08698219 | -11.68 | -0.55 | -12.39 | 2.73  | -1.47 |
| 6623 | CO[C@]@H](C(F)F)F                  | C08698307 | -11.68 | -1.47 | -11.47 | 2.59  | -1.33 |
| 6624 | CSc1ncc(c(n1)[O-])F                | C08952557 | -11.68 | -0.76 | -16.77 | 7.36  | -1.51 |
| 6625 | c1c[nH]c(=O)cc1C#N                 | C12471987 | -11.68 | -1.4  | -16.75 | 5.51  | 0.95  |
| 6626 | c1c(cc(c1O)C=O)F)F                 | C16159087 | -11.68 | -2.95 | -14.06 | 6.5   | -1.16 |
| 6627 | C#CC[C@]@H](CC)O                   | C21989128 | -11.68 | -1.17 | -13.29 | 4.01  | -1.24 |
| 6628 | c1ccc(cc1)OCC(=O)N                 | C00123519 | -11.67 | -1.45 | -18.11 | 9.26  | -1.37 |
| 6629 | Cn1ccn1CCl                         | C00158948 | -11.67 | -0.2  | -13.68 | 5.34  | -3.14 |
| 6630 | c1ccc(c(c1)N)n2ccn2                | C00161845 | -11.67 | -1.17 | -11.75 | 4.46  | -3.2  |
| 6631 | CCOC1=CC(=O)CC1                    | C00395538 | -11.67 | -1.43 | -13.58 | 6.03  | -2.69 |
| 6632 | CCNC(=O)CBr                        | C01673002 | -11.67 | -0.92 | -15.51 | 5.9   | -1.14 |
| 6633 | c1csccc1=O                         | C01716966 | -11.67 | -1.65 | -16.24 | 8.53  | -2.31 |
| 6634 | CC(=O)c1ccc(c(n1)F)                | C01732272 | -11.67 | -3.54 | -10.04 | 4.44  | -2.52 |
| 6635 | CCOCCOCC                           | C01866961 | -11.67 | -0.13 | -11.72 | 1.95  | -1.78 |
| 6636 | C(C(F)F)OC(F)F                     | C01995123 | -11.67 | -0.5  | -12.6  | 2.97  | -1.54 |
| 6637 | CCNC(=S)OCC                        | C05459724 | -11.67 | -2.11 | -12.9  | 1.66  | 1.68  |
| 6638 | COP(=S)OC                          | C05701293 | -11.67 | -3.46 | -11.59 | 12.02 | -8.64 |
| 6639 | C/C=C(\C)/C=NCC                    | C16137303 | -11.67 | 2.24  | -14.04 | 2.69  | -2.56 |
| 6640 | c1cc(c(cc1Nc2nccs2)Cl)F            | C20430005 | -11.67 | -0.11 | -12.5  | 5.47  | -4.52 |
| 6641 | C1CNC(=NC#N)N1                     | C20466852 | -11.67 | -1.38 | -16.36 | 9.02  | -2.94 |
| 6642 | Cc1cc(c(cn1)F)Cl                   | C21982020 | -11.67 | 0.63  | -11.8  | 2.47  | -2.97 |
| 6643 | C[C@]@H]1N=CCS1                    | C21999663 | -11.67 | -2.38 | -11.98 | 3.9   | -1.22 |
| 6644 | Cc1cc(ncn1)NN                      | C25491323 | -11.67 | -1.48 | -15.06 | 6.21  | -1.35 |
| 6645 | c1cnc2c1NC(=O)C2                   | C26894783 | -11.67 | -3.05 | -13.93 | 6.13  | -0.82 |
| 6646 | CCn1ccn1                           | C00403991 | -11.66 | -0.69 | -14.12 | 4.46  | -1.31 |
| 6647 | c1cc(cc(c1))O                      | C00404435 | -11.66 | -1.27 | -14.18 | 2.56  | 1.23  |
| 6648 | C=CCOC1ccnc(n1)N                   | C01644915 | -11.66 | -0.42 | -17.19 | 4.14  | 1.82  |
| 6649 | CCCN=C=O                           | C02041061 | -11.66 | -0.66 | -12.17 | 1.76  | -0.59 |
| 6650 | c1cnc(c(c1C(F)F)F)F)Cl             | C02525284 | -11.66 | 0.29  | -13.73 | 3.99  | -2.22 |
| 6651 | C(CO)NC(=O)c1c(no[n+]1[O-])N       | C03033217 | -11.66 | -7.98 | -14.14 | 7.19  | 3.26  |
| 6652 | c1cc(cc(c1)N)CO                    | C03861383 | -11.66 | -2.49 | -13.36 | 3.88  | 0.3   |
| 6653 | c1cnc(cc1C(F)F)F)O                 | C12359082 | -11.66 | 0.07  | -16.19 | 4.13  | 0.33  |
| 6654 | c1c(c(nnc1[O-])Cl)Cl               | C17062759 | -11.66 | -6.54 | -10.74 | 4.42  | 1.2   |
| 6655 | CCc1ccn(n1)CC                      | C26547544 | -11.66 | -2.02 | -10.58 | 4.46  | -3.52 |
| 6656 | COC(=O)c1c(ccs1)N                  | C00105231 | -11.65 | -3.01 | -12.26 | 5.26  | -1.65 |

|      |                                  |           |        |       |        |       |       |
|------|----------------------------------|-----------|--------|-------|--------|-------|-------|
| 6657 | CNC(=O)Nc1ccc(cc1)Cl             | C00392864 | -11.65 | -0.51 | -16    | 6.81  | -1.95 |
| 6658 | Cn1cccc1[N+](=O)[O-]             | C01573937 | -11.65 | -2.02 | -14.07 | 6.3   | -1.85 |
| 6659 | c1onc(cc1C(=O)N)F                | C01595323 | -11.65 | -3.77 | -15.49 | 6.37  | 1.24  |
| 6660 | CCOC(=O)CNC=O                    | C01653017 | -11.65 | -1.64 | -15.17 | 5.71  | -0.55 |
| 6661 | CCOC(=O)CNO                      | C01702711 | -11.65 | -3.98 | -13.36 | 4.23  | 1.47  |
| 6662 | C/C=C(C)/C@H](C)O                | C01730155 | -11.65 | -0.67 | -11.26 | 1.55  | -1.26 |
| 6663 | C=CCSCC(=O)Cl                    | C01743786 | -11.65 | -0.42 | -14.16 | 3.95  | -1.02 |
| 6664 | CCOC(=O)[C@H](C(=O)C(F)F)Cl      | C02390290 | -11.65 | 2.1   | -13.17 | 2.87  | -3.45 |
| 6665 | Cc1cc(no1)N=C=S                  | C02582838 | -11.65 | -0.4  | -14.73 | 4.73  | -1.24 |
| 6666 | CC(C)C#CO                        | C05358665 | -11.65 | -3.52 | -10.64 | 3.13  | -0.61 |
| 6667 | CS/C(=N/c1cccc1)/N               | C06485236 | -11.65 | 0.06  | -11.48 | 3.1   | -3.34 |
| 6668 | COc1ncc(s1)Br                    | C08614804 | -11.65 | -0.61 | -12.49 | 1.99  | -0.54 |
| 6669 | c1cc(c(cc1O)F)OC(F)F             | C12359205 | -11.65 | 0.9   | -14.81 | 3.43  | -1.17 |
| 6670 | C/C(=N/O)/N)Cl                   | C12504756 | -11.65 | -4.14 | -13.06 | 4.59  | 0.96  |
| 6671 | [H]/N=C(N)/N/C(=N/[H])/N(C)C     | C12859773 | -11.65 | -0.95 | -16.45 | 7.59  | -1.84 |
| 6672 | c1c[nH]c(=O)c2c1nc[nH]2          | C17300860 | -11.65 | -3.6  | -17.84 | 10.68 | -0.89 |
| 6673 | CCNc1cncn1                       | C21985100 | -11.65 | 1.05  | -14.09 | 5.33  | -3.94 |
| 6674 | C[C@H](C#N)OC(=O)n1ccnc1         | C21991411 | -11.65 | -1.84 | -12.22 | 5.99  | -3.58 |
| 6675 | CCOC(=O)n1cnnn1                  | C21999832 | -11.65 | -0.33 | -14.97 | 5     | -1.36 |
| 6676 | c1cc2c(cc1CBr)non2               | C00158673 | -11.65 | -3.14 | -12.53 | 4.83  | -0.83 |
| 6677 | c1cc(cc(c1)O)C(F)F               | C00164582 | -11.64 | -4.63 | -9.18  | 3.24  | -1.07 |
| 6678 | COc1ccc(cc1)OC(=O)Cl             | C00409390 | -11.64 | -1.66 | -11.85 | 3.67  | -1.8  |
| 6679 | c1c2n(cn1)C(=O)NCC2              | C01401979 | -11.64 | -0.89 | -16.55 | 7.74  | -1.94 |
| 6680 | CCCCNC(=O)S                      | C01661308 | -11.64 | 1.05  | -15.09 | 3.59  | -1.19 |
| 6681 | c1ccc2c(c1)[nH]c(n2)NN           | C01668389 | -11.64 | -5.37 | -10.9  | 7.18  | -2.56 |
| 6682 | C1C=C[C@@H]2[C@H]1C(=O)C2        | C01669120 | -11.64 | -0.62 | -11.29 | 3.48  | -3.22 |
| 6683 | c1c(c(=O)[nH]c(=O)[nH]1)[S-]     | C01680613 | -11.64 | -4.37 | -16.61 | 8.58  | 0.75  |
| 6684 | CC(C)C(=O)Cl                     | C01850092 | -11.64 | 1.6   | -13.22 | 2.39  | -2.4  |
| 6685 | CC/C=C(C)C#N                     | C02032406 | -11.64 | -1.48 | -11.97 | 4.24  | -2.43 |
| 6686 | C(C(=N/O)/N)CBr                  | C02547089 | -11.64 | -2.21 | -13.99 | 4.8   | -0.25 |
| 6687 | c1cc2c(cc1C(=O)Cl)non2           | C02565039 | -11.64 | -3.05 | -10.86 | 3.68  | -1.41 |
| 6688 | C[C@H]1C(=O)CCO1                 | C03880801 | -11.64 | -0.53 | -12.92 | 2.95  | -1.13 |
| 6689 | C1C(=O)O[C@@H](S1)C(F)F          | C04204970 | -11.64 | 0.03  | -14.08 | 5.27  | -2.86 |
| 6690 | CNc1ncc(cn1)Br                   | C04208971 | -11.64 | -1.46 | -10.06 | 3.05  | -3.17 |
| 6691 | C1COC=CO1                        | C05134270 | -11.64 | -1.03 | -12.68 | 2.98  | -0.91 |
| 6692 | C(CO)n1c(c(c(n1)N)[N+](=O)[O-])N | C07036852 | -11.64 | -6.83 | -15.12 | 6.54  | 3.77  |
| 6693 | c1c(ccc2c1[nH]nc2)F              | C14983251 | -11.64 | -2.79 | -12.71 | 4.58  | -0.72 |
| 6694 | c1c2c(cn1)nc([n-]2)C(F)F         | C17164797 | -11.64 | -0.41 | -12.47 | 4.05  | -2.81 |
| 6695 | c1cc(cc(c1)F)CC(=O)NN            | C19262827 | -11.64 | -6.16 | -14.34 | 10.3  | -1.44 |
| 6696 | c1cnc(c(c1N)N)Cl                 | C20028387 | -11.64 | -4.95 | -13.71 | 6.43  | 0.59  |
| 6697 | Cc1c(csn1)C=O                    | C20441798 | -11.64 | 1.1   | -16.04 | 4.99  | -1.7  |
| 6698 | Cc1nc(ns1)C=O                    | C20443860 | -11.64 | -2.36 | -15.53 | 7.14  | -0.89 |
| 6699 | c1cnc(c1)Cn2cccc2                | C00156227 | -11.63 | 1.05  | -13.18 | 5.26  | -4.76 |
| 6700 | C/C(=N/N)C(=O)                   | C00897463 | -11.63 | -1.65 | -14.17 | 5.49  | -1.29 |
| 6701 | C=CCOCCO                         | C01664999 | -11.63 | -3.12 | -12.69 | 3.8   | 0.37  |
| 6702 | COC(=O)[C@H](C#N)Br              | C01702492 | -11.63 | -1.48 | -13.64 | 5.41  | -1.92 |
| 6703 | c1cn(nn1)CCO                     | C02513900 | -11.63 | -3.22 | -16.59 | 6.91  | 1.26  |
| 6704 | C(=C/C(F)F)C(=O)N                | C02556478 | -11.63 | -0.93 | -15.94 | 5.14  | 0.1   |
| 6705 | c1ccc(cc1)S/C=C/C=O              | C05485505 | -11.63 | -1.86 | -13.98 | 5.33  | -1.12 |
| 6706 | COC(=O)c1c[nH]cn1                | C08101003 | -11.63 | -0.1  | -15.96 | 6.6   | -2.16 |
| 6707 | C[C@H]1[C@H]([O]1)C(F)F          | C08101014 | -11.63 | -0.94 | -12.07 | 2.89  | -1.51 |
| 6708 | c1cc(ncc1Cl)C(=O)N               | C14982479 | -11.63 | -2.77 | -13    | 4.24  | -0.1  |
| 6709 | C1C=C2[C@@H](C1=O)C=CC2=O        | C18722504 | -11.63 | -2.31 | -12.6  | 6.24  | -2.96 |
| 6710 | c1c(cncc1N)C(F)F                 | C26459981 | -11.63 | -3.33 | -11.85 | 4.6   | -1.05 |
| 6711 | c1c(csn1)N                       | C26510219 | -11.63 | -2.05 | -14.14 | 4.51  | 0.05  |
| 6712 | c1ccc2c(c1)cn(n2)Cl              | C00331522 | -11.62 | -2.43 | -13.51 | 5.06  | -0.74 |
| 6713 | COc1c(non1)N                     | C00967422 | -11.62 | -2.36 | -16.05 | 5.23  | 1.57  |
| 6714 | c1cc(c(cc1NC=O)F)F               | C01595327 | -11.62 | -2.79 | -16.34 | 9.58  | -2.08 |
| 6715 | c1[n+](cc(c1[N+](=O)[O-])F)[O-]  | C02559899 | -11.62 | 0.44  | -19.43 | 10.17 | -2.79 |
| 6716 | c1cc(sc1)/C=C/C(=O)NC(=O)N2      | C03120775 | -11.62 | 0.96  | -17.94 | 5.99  | -0.63 |
| 6717 | COCC/C(=[NH+]/N)/N               | C04203882 | -11.62 | -2.51 | -13.43 | 3.39  | 0.93  |
| 6718 | C(#N)c1c(non1)C(=[NH+]/N)/N      | C04771246 | -11.62 | 0.52  | -15.29 | 2.14  | 1.01  |
| 6719 | C/(C=C/CO)O                      | C05112523 | -11.62 | -5.14 | -12.59 | 3.84  | 2.26  |
| 6720 | CC(=O)NCC(N)C(=O)N               | C05196943 | -11.62 | -0.54 | -18.06 | 5.91  | 1.07  |
| 6721 | COc1CCCC1                        | C05997769 | -11.62 | -0.54 | -9.8   | 1.23  | -2.52 |
| 6722 | [H]/N=C1/C(=N/O)/SC(=N1)[O-]     | C06083804 | -11.62 | -6.27 | -14.18 | 6.17  | 2.66  |
| 6723 | Cc1cccnc1NN=O                    | C13213090 | -11.62 | -0.92 | -15.22 | 6.48  | -1.95 |
| 6724 | c1ccc(cc1)CN2NC(=O)ON2           | C17024860 | -11.62 | -1.07 | -14.36 | 5.76  | -1.95 |
| 6725 | c1c(c(c(nc1F)F)F)NN              | C21990772 | -11.62 | -2.22 | -14.39 | 5.22  | -0.23 |
| 6726 | Cc1cc(c(nc1)N)Cl                 | C26466278 | -11.62 | -1.05 | -11.7  | 3.15  | -2.02 |
| 6727 | C1C[C@H]2C(=CC=CC2=O)C1          | C01847232 | -11.61 | -2.37 | -9.79  | 3.14  | -2.58 |
| 6728 | C[C@H](C(=O)C)Cl                 | C02038107 | -11.61 | -1.41 | -12.49 | 4.75  | -2.46 |
| 6729 | C(C(=O)N=C=O)Cl                  | C02242678 | -11.61 | -0.05 | -16.5  | 4.22  | 0.72  |
| 6730 | COC(=O)c1nc([nH]n1)N             | C02584075 | -11.61 | -2.85 | -13.88 | 6.51  | -1.4  |
| 6731 | c1c(c([nH]n1)C(=N/O)/N)Cl        | C04335930 | -11.61 | -5.17 | -12.83 | 5.1   | 1.28  |
| 6732 | Cc1c(c(on1)N)SC#N                | C12372272 | -11.61 | -2.45 | -15.39 | 6.39  | -0.16 |
| 6733 | C[C@H](C)C(=O)C                  | C14592827 | -11.61 | 1.41  | -13.64 | 3.45  | -2.82 |
| 6734 | c1cc(c(c(c1C#N)F)Cl)F            | C16158182 | -11.61 | -2.28 | -10.57 | 5.27  | -4.03 |
| 6735 | CCc1c[nH]nc1N                    | C21985136 | -11.61 | -2.31 | -14.72 | 6.37  | -0.94 |
| 6736 | CCOC(=O)C1CC(=O)C1               | C32915207 | -11.61 | -0.19 | -13.02 | 4.88  | -3.27 |
| 6737 | CC(=O)Nc1cccnc1                  | C00152540 | -11.6  | -0.71 | -16.42 | 6.89  | -1.37 |
| 6738 | Cc1ccc(cc1)CON                   | C00167561 | -11.6  | -0.9  | -11.52 | 3.08  | -2.26 |
| 6739 | C=CC[C@H](c1ccc1)O               | C00403958 | -11.6  | 0.5   | -13.28 | 2.93  | -1.75 |
| 6740 | C[C@H](c1cccc1)O                 | C00896625 | -11.6  | -1.19 | -11.35 | 3     | -2.06 |
| 6741 | c1cc2nncn2nc1N                   | C01560835 | -11.6  | -5.15 | -18.99 | 12.25 | 0.29  |
| 6742 | C1(C(=O)NC(=O)NC1=O)Cl           | C01668485 | -11.6  | 1.17  | -19.55 | 5.06  | 1.72  |
| 6743 | C1CCN(CC1)Br                     | C01716333 | -11.6  | 0.44  | -10.44 | 0.87  | -2.48 |
| 6744 | Cc1ccc(c(n1)F)C#N                | C02384011 | -11.6  | -1.09 | -15.28 | 6.61  | -1.83 |
| 6745 | Cc1c(snn1)C#N                    | C02510173 | -11.6  | -1.74 | -11.35 | 3.14  | -1.65 |
| 6746 | COc1c(ccc(c1F)O)F                | C02527861 | -11.6  | -0.23 | -15.82 | 5.29  | -0.84 |

|      |                               |            |        |       |        |       |       |
|------|-------------------------------|------------|--------|-------|--------|-------|-------|
| 6747 | c1csc(c1Cl)Cl                 | C02584557  | -11.6  | -2.11 | -11.35 | 2.02  | -0.16 |
| 6748 | Cn1cncc1C#N                   | C04262654  | -11.6  | -2.68 | -11.41 | 5.54  | -3.05 |
| 6749 | C/C(=C/C(=O)C)Br/[O-]         | C04714958  | -11.6  | 0.79  | -12.72 | 2.44  | -2.1  |
| 6750 | C/C=C/C=C=O                   | C04759170  | -11.6  | -0.72 | -14.33 | 5.02  | -1.58 |
| 6751 | c1c[nH]c(=O)cc1               | C12370900  | -11.6  | -4.34 | -13.1  | 7.73  | -1.88 |
| 6752 | c1(c(non1)N)c2nc([nH]n2)N     | C16948454  | -11.6  | -4.32 | -15.67 | 8.72  | -0.33 |
| 6753 | c1c[nH]c(=O)c1[O-]Cl          | C171111113 | -11.6  | -2.88 | -16.86 | 5.36  | 2.78  |
| 6754 | Cc1ccc(o1)[C@@H](C)Cl         | C19413953  | -11.6  | 0.67  | -11.35 | 3.22  | -4.14 |
| 6755 | CCc1cnc(o1)C=O                | C20445052  | -11.6  | -1.5  | -15.77 | 6.35  | -0.68 |
| 6756 | CCOC(=O)[C@@H]1C[C@H]1CO      | C21984006  | -11.6  | -4.62 | -12.17 | 6.62  | -1.44 |
| 6757 | C1CC(=O)C(=C1)Br              | C30677948  | -11.6  | -2.23 | -13.02 | 6.49  | -2.85 |
| 6758 | CN(C)CCl                      | C31667387  | -11.6  | -1.11 | -11.27 | 1.51  | -0.73 |
| 6759 | c1cc(ccc1Cc2ncc2)N            | C32006826  | -11.6  | -3.11 | -17.7  | 8.04  | 1.16  |
| 6760 | c1ccc(cc1)c2cc([nH]n2)[O-]    | C00133300  | -11.59 | -3.05 | -13.9  | 5.01  | 0.36  |
| 6761 | [C@H](c1ccc(o1)O              | C00164796  | -11.59 | -1.47 | -14    | 4.63  | -0.75 |
| 6762 | CCc1ccccc1F                   | C00388676  | -11.59 | 2.03  | -14.98 | 4.28  | -2.92 |
| 6763 | COc1=O)CCOCc=C                | C01599222  | -11.59 | 0.23  | -13.86 | 3.74  | -1.7  |
| 6764 | c1ccc(cc1)C2=NC2              | C01712323  | -11.59 | -1.84 | -12.07 | 4.15  | -1.84 |
| 6765 | CCCN=C=S                      | C01845905  | -11.59 | -0.03 | -13.38 | 1.19  | 0.62  |
| 6766 | c1cc(c(cc1Cl)O)CO             | C01872360  | -11.59 | -1.25 | -14.32 | 3.73  | 0.25  |
| 6767 | COc1=O)CN1CCSC1=[NH2+]        | C02454574  | -11.59 | 0.93  | -17.28 | 7.48  | -2.71 |
| 6768 | c1cc(c(c1)F)F)N=C=S           | C02506747  | -11.59 | 0.6   | -15.12 | 4.21  | -1.27 |
| 6769 | c1cc(c(c1)N)O                 | C02512960  | -11.59 | -3.2  | -10.34 | 2.56  | -0.62 |
| 6770 | Cc1cnn(c1)CC=O                | C02537469  | -11.59 | -2.58 | -14.04 | 7.3   | -2.27 |
| 6771 | C=Cc1cnc1                     | C05976084  | -11.59 | -1.21 | -11.1  | 4.17  | -3.44 |
| 6772 | CCc1cnc1                      | C06755998  | -11.59 | -3.02 | -13.82 | 3.96  | 1.29  |
| 6773 | CNOC(=O)c1ccc(o1              | C15780035  | -11.59 | 0.03  | -14.95 | 5.62  | -2.3  |
| 6774 | c1c(cnc(=O)[nH]1)F            | C16697945  | -11.59 | -2.12 | -16.04 | 4.23  | 2.34  |
| 6775 | [C@H]1C=C[C@H](S1)C           | C16981767  | -11.59 | -0.76 | -9.16  | 2.18  | -3.84 |
| 6776 | C(SC(=[NH2+])N)SC(=[NH2+])N   | C17289287  | -11.59 | -2.53 | -13.17 | 2.96  | 1.14  |
| 6777 | c1cc(c([nH]c1)C[NH3+])O       | C20443406  | -11.59 | -1.21 | -17.93 | 5.67  | 1.88  |
| 6778 | CCc1nc(cs1)CS                 | C31890184  | -11.59 | -0.87 | -11.17 | 3.6   | -3.15 |
| 6779 | Cc1ccc(cc1)NC(=O)C            | C00080878  | -11.58 | -0.24 | -15.09 | 6.81  | -3.07 |
| 6780 | Cc1ccc(cc1)N)Cl               | C00407045  | -11.58 | -2.82 | -11.19 | 1.97  | 0.46  |
| 6781 | CCOC(=O)Cc1ccc(s1             | C00409165  | -11.58 | 1.14  | -12.95 | 4.71  | -4.47 |
| 6782 | COc1=O)Cn1cnc1                | C01390106  | -11.58 | -1.11 | -17.54 | 10.69 | -3.62 |
| 6783 | c1c(c(cc1O)O)O                | C01727808  | -11.58 | -4.36 | -17.52 | 6.17  | 4.12  |
| 6784 | C1CSC(=N)S1                   | C01736448  | -11.58 | 0.5   | -14.91 | 4.27  | -1.43 |
| 6785 | Cn1cc(c(n1)C(=O)N)N           | C02558393  | -11.58 | -4.95 | -16.26 | 7.02  | 2.61  |
| 6786 | c1cc(cc1)OC(F)F)O             | C02560136  | -11.58 | 0.73  | -16.93 | 4.9   | -0.27 |
| 6787 | [C@H](c1ccc(cc1)O             | C04262371  | -11.58 | -0.39 | -12.27 | 2.41  | -1.33 |
| 6788 | Cc1cc(sc1)CO                  | C04277326  | -11.58 | -1.29 | -12.9  | 3.68  | -1.08 |
| 6789 | C1[C@H](C=C[C@H]1O)O          | C04761434  | -11.58 | -2.68 | -13.96 | 3.2   | 1.85  |
| 6790 | c1([nH]c1c([nH]1[O-])N)[O-]N  | C05123717  | -11.58 | -4.52 | -18.7  | 9.35  | 2.29  |
| 6791 | c1c(cc(c1C#N)O)F)F            | C16158096  | -11.58 | 1.26  | -15.58 | 4.32  | -1.58 |
| 6792 | CCSc1cnc(s1)N                 | C19440122  | -11.58 | -0.06 | -14.61 | 5.39  | -2.31 |
| 6793 | Cc1nc(cnn1)N                  | C19801101  | -11.58 | -4.6  | -14.67 | 7.88  | -0.19 |
| 6794 | c1[nH]nc(n1)c2c(non2)N        | C01052727  | -11.57 | -6.38 | -14.43 | 10    | -0.77 |
| 6795 | COCCOC(=O)CBr                 | C01598909  | -11.57 | 0.35  | -16.34 | 4.93  | -0.5  |
| 6796 | C#CCOCCBr                     | C01639893  | -11.57 | 0.18  | -14.83 | 3.82  | -0.74 |
| 6797 | C1C[C@H](C[C@H](C1)SC#N)O     | C01665881  | -11.57 | -0.57 | -13.97 | 4.09  | -1.12 |
| 6798 | Cn1nc(nn1)CCO                 | C01726461  | -11.57 | -3.11 | -15.82 | 6.16  | 1.2   |
| 6799 | C(C(F)F)OC(C(F)F)F)F          | C02560091  | -11.57 | -0.45 | -10.77 | 3.32  | -3.67 |
| 6800 | CCc1cnc1                      | C02584490  | -11.57 | -1.78 | -14.58 | 8.62  | -3.83 |
| 6801 | CN1CCCC1=O                    | C03860621  | -11.57 | -1.12 | -14.66 | 5.87  | -1.66 |
| 6802 | C1CSCSC1                      | C03861206  | -11.57 | 0.24  | -10.63 | 2.01  | -3.19 |
| 6803 | C/C=C/C(C)C                   | C04533109  | -11.57 | -2.22 | -12.28 | 2.11  | 0.82  |
| 6804 | C1CC1C#CCO                    | C06665111  | -11.57 | -1.75 | -12.92 | 4.44  | -1.33 |
| 6805 | c1cc(cnc1)NC=C(C#N)C#N        | C12484090  | -11.57 | -1.15 | -16.18 | 8.82  | -3.07 |
| 6806 | CCSc1nnc(s1)N                 | C17744349  | -11.57 | -1.34 | -14.36 | 5.62  | -1.49 |
| 6807 | c1csc2c1[C@H](CC2)O           | C19727104  | -11.57 | -0.49 | -14.52 | 4.96  | -1.53 |
| 6808 | Cc1cc(ncn1)OC                 | C19872635  | -11.57 | 0.08  | -13.89 | 3.63  | -1.4  |
| 6809 | C1=C2[C@H](N=CN=C2N=N1)N      | C20230335  | -11.57 | -2.11 | -16.59 | 6.01  | 1.12  |
| 6810 | Cc1cc(ncn1)C=O                | C20443755  | -11.57 | -2.2  | -11.48 | 4.3   | -2.19 |
| 6811 | Cc1c(ccnc1)F)Br               | C21981953  | -11.57 | -2.36 | -9.35  | 3.01  | -2.88 |
| 6812 | c1cc2c(cc1F)nc([nH]2)CC#N     | C26471035  | -11.57 | -6.2  | -12.24 | 10.38 | -3.52 |
| 6813 | c1c(nns1)CO                   | C32627325  | -11.57 | -3.37 | -15.03 | 5.61  | 1.22  |
| 6814 | CC(=O)Nc1ccccc1               | C00142824  | -11.56 | -0.73 | -14.85 | 6.68  | -2.65 |
| 6815 | C=Cc1c[nH]c(=O)[nH]c1=O       | C01574276  | -11.56 | -2.43 | -20.51 | 10.16 | 1.22  |
| 6816 | c1csc(c1)C(=O)C=O             | C01695362  | -11.56 | 1     | -21.01 | 9.75  | -1.32 |
| 6817 | COc1=O)Cc1csc(n1)N            | C02028787  | -11.56 | -2.88 | -13.63 | 7.02  | -2.07 |
| 6818 | c1csc2c1c(ncn2)N              | C02243965  | -11.56 | -0.79 | -14.66 | 5.91  | -2.01 |
| 6819 | CCc1ccc(cc1)C#N               | C02565985  | -11.56 | -0.94 | -11.77 | 3.49  | -2.34 |
| 6820 | [C@H](C(F)F)OC(F)F)F          | C03776875  | -11.56 | -0.64 | -12.65 | 3.33  | -1.6  |
| 6821 | C(CS)OC(=S)S                  | C04429747  | -11.56 | -1.76 | -12.06 | 4.22  | -1.96 |
| 6822 | [C@H](C=C[C@H](C)O)O          | C04743006  | -11.56 | -2.8  | -13.3  | 3.44  | 1.11  |
| 6823 | COP(O)OC                      | C05020018  | -11.56 | -1.62 | -13.76 | 5.6   | -1.78 |
| 6824 | c1nc([nH]n1)CO                | C06585091  | -11.56 | -4.89 | -14.87 | 5.49  | 2.71  |
| 6825 | c1c(c(nc1)SC(=[NH2+])N)N)F    | C09189663  | -11.56 | -1.2  | -15.05 | 4.69  | 0     |
| 6826 | c1cc(cc1)F)OCCNO              | C19727909  | -11.56 | -2.49 | -14.45 | 5.65  | -0.26 |
| 6827 | c1cnc(nc1)/C=N/O              | C22016729  | -11.56 | -3.1  | -16.88 | 8.12  | 0.3   |
| 6828 | Cc1ccc(cn1)C(F)F)F            | C30714873  | -11.56 | 0.15  | -11.38 | 2.97  | -3.3  |
| 6829 | c1cc(cc1)F)C(=O)C(F)F)F       | C01601803  | -11.55 | 1.65  | -13.02 | 2.98  | -3.17 |
| 6830 | CCCN[+](=O)[O-]               | C01668639  | -11.55 | -1.11 | -13.13 | 4.22  | -1.54 |
| 6831 | CC(=O)C(F)F)F                 | C01693867  | -11.55 | -1.06 | -11.75 | 2.99  | -1.74 |
| 6832 | CC(=CCOC)C                    | C01765828  | -11.55 | -0.71 | -11.44 | 1.67  | -1.06 |
| 6833 | CC1(C=CC(=O)C=C1)O            | C01851971  | -11.55 | -2.29 | -14.27 | 5.72  | -0.71 |
| 6834 | C1CCC(C1)CC(=O)Cl             | C02560067  | -11.55 | -0.69 | -12.58 | 2.59  | -0.88 |
| 6835 | Cc1ccc(cc1)CN=C=O             | C02568122  | -11.55 | -1.82 | -10.56 | 2.9   | -2.06 |
| 6836 | [C@H]1(C=C(C(=O)O1)Cl)Cl)[O-] | C03882174  | -11.55 | -1.96 | -14.26 | 5.4   | -0.72 |

|      |                              |           |        |       |        |       |       |
|------|------------------------------|-----------|--------|-------|--------|-------|-------|
| 6837 | c1cc(ccc1CC(=O)NN)F          | C03888145 | -11.55 | -5.68 | -13.27 | 8.82  | -1.41 |
| 6838 | Cc1c(oc1Br)C                 | C04198776 | -11.55 | -0.47 | -11.87 | 3.78  | -2.99 |
| 6839 | CCOC(=O)c1cnoc1              | C04208879 | -11.55 | -0.73 | -13.28 | 5.21  | -2.76 |
| 6840 | CN(C)C(=NH2+)SC              | C04620596 | -11.55 | -1.09 | -13.04 | 2.54  | 0.04  |
| 6841 | C(C(=O)N)NC(=O)C=[N+]=[N-]   | C04727053 | -11.55 | -1.94 | -20.11 | 7.94  | 2.56  |
| 6842 | c1(=O)[nH][nH]c(=O)n1N       | C04761831 | -11.55 | -4.39 | -16.58 | 6.97  | 2.44  |
| 6843 | c1cc(ncc1[N+](=O)[O-])NN=O   | C05933595 | -11.55 | -3.32 | -12.8  | 6.37  | -1.8  |
| 6844 | C[C@@H](c1cccs1)S            | C06661650 | -11.55 | -0.44 | -9.38  | 2.07  | -3.8  |
| 6845 | Cn1cnc(c1N)/C(=N/O)/N        | C17041968 | -11.55 | -4.55 | -16.71 | 9.4   | 0.32  |
| 6846 | Cc1ccsc1CNN                  | C19271386 | -11.55 | 1.01  | -13.6  | 2.25  | -1.21 |
| 6847 | c1c(cnc1C#N)CO               | C21984979 | -11.55 | -2.04 | -15.35 | 6.2   | -0.35 |
| 6848 | COC(=O)C1CC1                 | C00164516 | -11.54 | -0.63 | -11.75 | 3.69  | -2.85 |
| 6849 | Cc1cc(ccn1)[N+](=O)[O-]      | C00332953 | -11.54 | 0.26  | -12.96 | 4.26  | -3.1  |
| 6850 | C[C@H](C(=O)OC)Br            | C02046232 | -11.54 | -0.81 | -11.29 | 3.31  | -2.74 |
| 6851 | CCNc1ccccc1F                 | C02557563 | -11.54 | -1    | -12.55 | 2.41  | -0.4  |
| 6852 | CC(=O)O[C@@H]1CS(=O)(=O)C=C1 | C04304352 | -11.54 | -1.03 | -19.42 | 9.63  | -0.72 |
| 6853 | Cc1ccc(cc1)NC(=O)NO          | C04809417 | -11.54 | -1.69 | -22.45 | 10.76 | 1.84  |
| 6854 | C1C(=O)COC1=O                | C05187742 | -11.54 | -4.37 | -14.31 | 6.73  | 0.41  |
| 6855 | Cc1c[nH]nc1c2ccco2           | C05212214 | -11.54 | 0.26  | -14.11 | 4.86  | -2.56 |
| 6856 | C=CC(=O)Nn1ccccc1            | C05283019 | -11.54 | 0.41  | -18.71 | 7.2   | -0.44 |
| 6857 | CC(=C)C/N=C/C)S              | C05423668 | -11.54 | -0.57 | -13.77 | 1.77  | 1.04  |
| 6858 | CCOC(=O)[C@H](C)OC(=O)C      | C05575470 | -11.54 | -0.07 | -13.22 | 5.68  | -3.93 |
| 6859 | CCn1c(non1)N                 | C05956921 | -11.54 | -3.11 | -14.65 | 5.87  | 0.35  |
| 6860 | C1C(=O)N(C(=O)S1)CCBr        | C08804400 | -11.54 | 0.92  | -14.83 | 4.69  | -2.32 |
| 6861 | c1cc(c(c1)Br)O)N             | C12471080 | -11.54 | -1.24 | -13.04 | 3.13  | -0.39 |
| 6862 | c1c(c(nc1F)[O-])[O-]C#N      | C12958601 | -11.54 | -1.76 | -19.59 | 6.04  | 3.76  |
| 6863 | c1c(cc(cc1F)Br)N             | C15442259 | -11.54 | -0.6  | -10.73 | 2.13  | -2.33 |
| 6864 | c1c(cnc(c1[N+](=O)[O-])N)Br  | C19202471 | -11.54 | -1.88 | -11.32 | 3.72  | -2.07 |
| 6865 | c1ccc(c(c1)CNC(=S)N)F        | C20586255 | -11.54 | -0.21 | -20.91 | 12.47 | -2.89 |
| 6866 | C1[C@H]2C(=O)C=C[C@@H](O1)O2 | C22061526 | -11.54 | -2.01 | -13.66 | 4.92  | -0.79 |
| 6867 | CC(=O)N1C(cc(=O)[nH]c1=O)N   | C26506240 | -11.54 | -2.1  | -16.49 | 6.04  | 1     |
| 6868 | CCC(=O)c1cccnc1              | C01995302 | -11.53 | -1.24 | -12.12 | 4.87  | -3.04 |
| 6869 | C(c1nc(nc(n1)N)N)Cl          | C02023116 | -11.53 | -1.82 | -12.39 | 5.11  | -2.43 |
| 6870 | Cn1c(=O)ccc(n1)Cl            | C02391439 | -11.53 | -2.81 | -12.48 | 5.19  | -1.44 |
| 6871 | CCn1cc(cn1)C(=O)Cl           | C02521290 | -11.53 | -2.13 | -11.46 | 4.86  | -2.8  |
| 6872 | c1cc2c(c(c1)O)[nH]n2         | C02571481 | -11.53 | -6.41 | -15.9  | 9.87  | 0.91  |
| 6873 | c1c(cc(c(c1F)F)CO            | C02575053 | -11.53 | -1.8  | -13.23 | 4.86  | -1.35 |
| 6874 | c1ccc2c(c1)[C@@H](C2=O)Cl    | C03848331 | -11.53 | -1.75 | -9.93  | 4.2   | -4.06 |
| 6875 | c1(c(nc1nc1)N)N)N=O          | C03861400 | -11.53 | -1.4  | -16.69 | 5.48  | 1.08  |
| 6876 | CCCCON(O)O                   | C04235229 | -11.53 | -3.36 | -13.39 | 4.7   | 0.52  |
| 6877 | c1ccn2cc(nc2c1)C=O           | C04262674 | -11.53 | -4.39 | -10.85 | 7.27  | -3.56 |
| 6878 | CCOCCSC(=NH2+)N              | C04650241 | -11.53 | -2.59 | -14.08 | 3.07  | 2.08  |
| 6879 | C/C=C\CCCO                   | C05225098 | -11.53 | -0.99 | -11.37 | 2.04  | -1.22 |
| 6880 | Cn1c(=O)[nH]c(=O)n(c1=O)C    | C05296475 | -11.53 | -0.82 | -14.85 | 4.62  | -0.47 |
| 6881 | c1cn(c(n1)[N+](=O)[O-])CCCl  | C13207468 | -11.53 | -2.62 | -11.95 | 8.88  | -5.84 |
| 6882 | c1d[nH]c2c1cnc(c2)Cl         | C14985682 | -11.53 | 1.77  | -15.91 | 5.14  | -2.52 |
| 6883 | c1cc(ncc1N)CO                | C21985574 | -11.53 | -2.54 | -17.33 | 6.75  | 1.59  |
| 6884 | CCOC(=O)C(C)C                | C00391109 | -11.52 | -0.49 | -10.87 | 3.3   | -3.46 |
| 6885 | c1ccc(c(cc1)F)N              | C00409350 | -11.52 | -0.64 | -13.81 | 2.17  | 0.77  |
| 6886 | C/C=C/C)C(=O)N               | C01763171 | -11.52 | -1.09 | -14.83 | 4.72  | -0.32 |
| 6887 | CSc1ccc(cc1)C=O              | C02166804 | -11.52 | 0.44  | -13.12 | 5.07  | -3.91 |
| 6888 | CNC(=O)c1c(nc1)[O-]N         | C03165662 | -11.52 | -6.71 | -10.43 | 5.51  | 0.11  |
| 6889 | C/C(=C=C)CO                  | C04701646 | -11.52 | -0.75 | -12.42 | 2.76  | -1.1  |
| 6890 | c1c(snn1)N                   | C05439122 | -11.52 | -3.54 | -14.67 | 5.89  | 0.8   |
| 6891 | C1C(=O)N/C(=N/C(=NH2+))N)/S1 | C12844147 | -11.52 | 1.34  | -17.07 | 4.9   | -0.7  |
| 6892 | c1cc(cc(c1)Cl)CN=C=O         | C19730707 | -11.52 | -1.82 | -10.85 | 3.19  | -2.03 |
| 6893 | c1cc(sc1)[C@@H](C(F)F)N      | C20475297 | -11.52 | -1.29 | -11.25 | 2.75  | -1.73 |
| 6894 | c1cncc(c1C(=O)N)N            | C30678199 | -11.52 | -3.94 | -17.16 | 7.56  | 2.01  |
| 6895 | CCCNc1nnns1                  | C32603393 | -11.52 | -1.9  | -14.1  | 5.87  | -1.39 |
| 6896 | c1ccc(c2c(c1)nsn2)N          | C00161237 | -11.51 | -1.7  | -13.91 | 4.38  | -0.28 |
| 6897 | c1cnc2nc(nc2c1)CCl           | C01301235 | -11.51 | -3.32 | -14.08 | 11.1  | -5.21 |
| 6898 | Cc1ccncc1CO                  | C01656171 | -11.51 | -2.63 | -13.32 | 5.06  | -0.61 |
| 6899 | CCOC(=O)NC(=O)O              | C01757823 | -11.51 | -6.49 | -15.15 | 8.61  | 1.51  |
| 6900 | C1C[C@H](OC1)CCl             | C02033089 | -11.51 | -0.31 | -11.44 | 2.56  | -2.31 |
| 6901 | c1cc(c(c(c1)F)F)C(=O)Cl      | C02584346 | -11.51 | -1.34 | -14.96 | 6.78  | -1.99 |
| 6902 | c1cc(cc(c1)F)NC(=O)C(F)F     | C03196213 | -11.51 | -2.4  | -10.53 | 3.63  | -2.21 |
| 6903 | Cc1cc(cc1)C=O                | C04208884 | -11.51 | -2.84 | -13.39 | 7.04  | -2.33 |
| 6904 | CCOC(=O)[C@H](C)S            | C04802725 | -11.51 | -0.93 | -11.22 | 3.61  | -2.98 |
| 6905 | c1csc(c1[N+](=O)[O-])N       | C05522052 | -11.51 | -4.09 | -14.6  | 6.48  | 0.7   |
| 6906 | c1cn2c(n1)c(c[nH]2)C#N       | C05647555 | -11.51 | -4.05 | -18.08 | 13.25 | -2.63 |
| 6907 | c1cnccc1C(=O)CCl             | C11919359 | -11.51 | 1.19  | -16.41 | 6.56  | -2.86 |
| 6908 | c1cncc2c1[nH]nc2C(F)F        | C11919527 | -11.51 | -1.72 | -12.44 | 4.44  | -1.79 |
| 6909 | Cc1c(ncn1)C(=O)Cl            | C16124695 | -11.51 | -2.26 | -13.74 | 4.78  | -0.3  |
| 6910 | CCn1ccncc1Cl                 | C30677689 | -11.51 | -1.27 | -11.52 | 4.63  | -3.35 |
| 6911 | c1ccc2c(c1)[nH+]nn2N         | C00230381 | -11.5  | -3.92 | -14.18 | 7.32  | -0.73 |
| 6912 | CC(=C)C(=O)OCCCl             | C01561514 | -11.5  | -0.9  | -11.24 | 4.42  | -3.78 |
| 6913 | CCn1cc(c(=O)[nH]c1=O)F       | C01600523 | -11.5  | -2.22 | -18.39 | 9.11  | -0.01 |
| 6914 | c1cc(cc2c1ccs2)N             | C01666822 | -11.5  | -1.95 | -10.6  | 3.76  | -2.72 |
| 6915 | C[C@H](CC=C)O                | C02031653 | -11.5  | -1.68 | -10.78 | 1.62  | -0.66 |
| 6916 | C1Sc2c(sc(=O)s2)S1           | C02508341 | -11.5  | 0.77  | -14.72 | 3.49  | -1.04 |
| 6917 | c1c(n[n-]n1)C=O              | C04353756 | -11.5  | -4.49 | -15.61 | 8.06  | 0.54  |
| 6918 | c1cc2cn[nH]c2cc1O            | C06093719 | -11.5  | -0.73 | -17.55 | 6.93  | -0.16 |
| 6919 | COc1ccncc1                   | C06424941 | -11.5  | -0.46 | -16.45 | 5.6   | -0.18 |
| 6920 | c1cc(c(cc1)F)C(=N/O)/N)F     | C06862924 | -11.5  | -0.41 | -16.81 | 5.46  | 0.26  |
| 6921 | CCOC(=O)[C@H](C(F)F)F        | C08698297 | -11.5  | -0.31 | -11.87 | 4.03  | -3.35 |
| 6922 | C1(=O)C(=NC(=S)N1)[O-]       | C17744176 | -11.5  | -5.04 | -17.81 | 9.36  | 1.99  |
| 6923 | c1c(noc1C2CC2)CCl            | C19093263 | -11.5  | 2.71  | -13.81 | 3.85  | -4.24 |
| 6924 | c1nc([nH]n1)SC[C@@H]2CO2     | C19863792 | -11.5  | -6.27 | -13.06 | 9.46  | -1.62 |
| 6925 | COc1cc(sc1)C(=O)Cl           | C21982418 | -11.5  | -1.44 | -11.44 | 3.66  | -2.29 |
| 6926 | C1C[C@H](C(=O)C1)C(F)F       | C22014869 | -11.5  | -0.8  | -11.92 | 4.36  | -3.14 |

|      |                                   |           |        |       |        |      |       |
|------|-----------------------------------|-----------|--------|-------|--------|------|-------|
| 6927 | C[C@H](c1cccs1)Cl                 | C32005547 | -11.5  | -0.38 | -9.2   | 2.18 | -4.1  |
| 6928 | C1COC(=O)C#N                      | C32628066 | -11.5  | 0.88  | -16.12 | 5    | -1.27 |
| 6929 | Cc1c[nH]cc1C(=O)C                 | C00076525 | -11.49 | -4.14 | -12.42 | 7.75 | -2.68 |
| 6930 | c1cc(cc(c1)O)C=O                  | C00901630 | -11.49 | -2.99 | -14.27 | 6.81 | -1.04 |
| 6931 | CCC(=S)N(C)O                      | C01629969 | -11.49 | -2.81 | -12.91 | 5.42 | -1.19 |
| 6932 | CNc1cncnc1N                       | C01654212 | -11.49 | -2.02 | -13.67 | 4.62 | -0.43 |
| 6933 | CCOC[N+](=O)[O-]                  | C01666927 | -11.49 | -0.63 | -11.24 | 3.41 | -3.02 |
| 6934 | c1cnc(nc1C#N)Cl                   | C01689926 | -11.49 | -2.86 | -12.62 | 6.04 | -2.06 |
| 6935 | C(=C(C)Cl)(C(=O)N)Cl              | C01733712 | -11.49 | -1.46 | -12.59 | 2.87 | -0.31 |
| 6936 | c1ccc(cc1)C[C@H](CF)O             | C02045792 | -11.49 | -4.22 | -9.41  | 4.71 | -2.57 |
| 6937 | C(C/C(=N/O)/N)CCl                 | C02547116 | -11.49 | -2.11 | -14.21 | 4.95 | -0.12 |
| 6938 | CC/C=C/C/C=O                      | C02560463 | -11.49 | -2.13 | -9.91  | 2.41 | -1.87 |
| 6939 | CC(=O)O[C@H]1Cc2c1cccc2           | C03847740 | -11.49 | -0.06 | -12.15 | 5.86 | -5.14 |
| 6940 | c1cnc(nc1)F                       | C06119128 | -11.49 | -2.07 | -15.18 | 5.98 | -0.23 |
| 6941 | C=C[C@H](CCBr)O                   | C06129902 | -11.49 | -0.83 | -10.75 | 1.64 | -1.55 |
| 6942 | COC(=O)C=CNc1cccc1                | C06664522 | -11.49 | -1.42 | -13.66 | 4.82 | -1.23 |
| 6943 | COCCS                             | C12481545 | -11.49 | -0.45 | -11.16 | 1.18 | -1.07 |
| 6944 | c1cc(c(nc1)C(=O)N)N               | C26897415 | -11.49 | -6.41 | -12.79 | 5.95 | 1.76  |
| 6945 | CC(=O)Nc1ccsc1                    | C00402245 | -11.48 | -0.56 | -17.74 | 6.46 | 0.37  |
| 6946 | COC=C=C                           | C01585463 | -11.48 | -0.68 | -12.17 | 3.03 | -1.66 |
| 6947 | CSC(=O)SC                         | C01757801 | -11.48 | -0.78 | -12.6  | 2.19 | -0.3  |
| 6948 | c1c(cc(c1F)N=C=O)F)Br             | C02389297 | -11.48 | 0.05  | -12    | 1.7  | -1.23 |
| 6949 | c1[nH]c(=O)c2c(n1)CCC2            | C16855224 | -11.48 | -2.58 | -15.66 | 9.19 | -2.43 |
| 6950 | c1cnn(c1)CCC=O                    | C19089272 | -11.48 | -1.32 | -15.31 | 7.4  | -2.26 |
| 6951 | CSc1cncn1N                        | C19093284 | -11.48 | 1.22  | -14.38 | 4.61 | -2.92 |
| 6952 | c1ccc(cc1)CCN[NH3+]               | C19166991 | -11.48 | 0.82  | -13.45 | 3.07 | -1.92 |
| 6953 | c1(nnc(s1)N)C(F)F                 | C20475421 | -11.48 | -5.19 | -14    | 8.4  | -0.69 |
| 6954 | c1cc2c(cc[nH]2)cc1O               | C00395637 | -11.47 | -1.62 | -13.88 | 5.19 | -1.16 |
| 6955 | C/C=C/C#N                         | C01645020 | -11.47 | -1.47 | -11.63 | 4.14 | -2.52 |
| 6956 | C[C@H]1C(=O)CCO1                  | C03880802 | -11.47 | -0.3  | -13.13 | 3.05 | -1.08 |
| 6957 | CNSc1nncs1                        | C04454362 | -11.47 | -2.09 | -13.99 | 4.87 | -0.26 |
| 6958 | c1cc(ccc1/C=N/O)[N+](=O)[O-]      | C04759249 | -11.47 | -4.63 | -13.19 | 7.22 | -0.87 |
| 6959 | C/C=C/C=C(=O)N                    | C04976360 | -11.47 | -0.92 | -15.34 | 5.47 | -0.68 |
| 6960 | C#C/C=N=C1cccc1                   | C18061018 | -11.47 | -0.62 | -11.26 | 4.25 | -3.85 |
| 6961 | c1cc(oc1)[C@H]2CO2                | C19730638 | -11.47 | -1.84 | -13.83 | 5.49 | -1.29 |
| 6962 | CNc1nc([nH]n1)N                   | C19802099 | -11.47 | -3.96 | -14.89 | 9.44 | -2.06 |
| 6963 | c1cncn1CO                         | C26547719 | -11.47 | -2.89 | -14.96 | 5.8  | 0.58  |
| 6964 | COC(=O)c1cncn1                    | C00157407 | -11.46 | 0.5   | -16.67 | 5.86 | -1.15 |
| 6965 | CCOc1cccc1N                       | C00157538 | -11.46 | -1.48 | -10.47 | 2.61 | -2.12 |
| 6966 | c1ccnc(c1)C=O                     | C00158582 | -11.46 | -2.12 | -16.07 | 8.6  | -1.87 |
| 6967 | Cc1cc(=O)n(c(n1)N)C               | C00405742 | -11.46 | -6.22 | -11.48 | 8.55 | -2.31 |
| 6968 | CC[C@H](C=C)C)O                   | C01592387 | -11.46 | -0.41 | -11.22 | 1.47 | -1.31 |
| 6969 | c1c(c(c1/c(=[NH+])/N)/[nH]1)F)N)F | C02386480 | -11.46 | -2.87 | -12.63 | 3.5  | 0.54  |
| 6970 | Cc1nc2nncn2c(n1)[O-]              | C02508182 | -11.46 | -2.24 | -15.97 | 11   | -4.25 |
| 6971 | c1cc2c(cc1Cl)OC(O2)(F)F           | C02540166 | -11.46 | 0.24  | -11.18 | 2.59 | -3.12 |
| 6972 | Cc1nncn1N                         | C04202754 | -11.46 | -4.22 | -14.82 | 6.53 | 1.05  |
| 6973 | C(CS)OCCS                         | C04362791 | -11.46 | -1.28 | -12.42 | 1.1  | 1.14  |
| 6974 | C[S+](C)CCC#C                     | C04773266 | -11.46 | 0.48  | -10.75 | 1.65 | -2.84 |
| 6975 | c1ccc(c1)c2ccn[nH]2)N             | C04822927 | -11.46 | -1.11 | -12.94 | 4.66 | -2.06 |
| 6976 | c1c(c2c(nc[nH]2)nn1)Cl            | C04877273 | -11.46 | -5.05 | -12.56 | 8.4  | -2.25 |
| 6977 | Cc1cc([nH]c1)CO                   | C15020415 | -11.46 | -2.62 | -13.81 | 5.17 | -0.21 |
| 6978 | C1C=C(COCO1)Br                    | C15042936 | -11.46 | -0.05 | -12.57 | 2.89 | -1.73 |
| 6979 | c1cc(c(cc1F)C(=C)C=O)/[O-]O       | C15442682 | -11.46 | -1.67 | -15.19 | 7.96 | -2.56 |
| 6980 | CCc1cc(cnc1)C                     | C15781891 | -11.46 | -1.08 | -9.43  | 2.72 | -3.68 |
| 6981 | CCOC(=O)C=CCl                     | C17063870 | -11.46 | 0.38  | -10.45 | 2.81 | -4.2  |
| 6982 | CCOc1ccnnc1N                      | C19092421 | -11.46 | -1.57 | -12.11 | 3.64 | -1.41 |
| 6983 | CC(=CC(=O)C)BrC                   | C26506285 | -11.46 | -0.75 | -11.04 | 4.13 | -3.8  |
| 6984 | c1cnc(cc1[N+](=O)[O-])Cl          | C00151260 | -11.45 | 0     | -12.58 | 4.11 | -2.98 |
| 6985 | CCC(=O)CC(=O)CC                   | C00388711 | -11.45 | -1.99 | -11.97 | 4.15 | -1.64 |
| 6986 | Cc1c([nH]nc1C(=O)OC               | C00402175 | -11.45 | -1.17 | -14.44 | 4.37 | -0.22 |
| 6987 | CC[C@H](c1ccco1)O                 | C00403956 | -11.45 | -1.65 | -11.34 | 2.87 | -1.33 |
| 6988 | c1cc(ccc1C(F)F)NC=O               | C01595333 | -11.45 | -2.48 | -14.64 | 7.5  | -1.83 |
| 6989 | c1cnc(c1)/C=N/N                   | C01606671 | -11.45 | -2.39 | -17.18 | 5.68 | 2.44  |
| 6990 | CC(=O)CSC(=O)C                    | C01626914 | -11.45 | -0.29 | -15.53 | 5.34 | -0.96 |
| 6991 | Cc1c(non1)CCl                     | C02387467 | -11.45 | -1.36 | -14.84 | 6.51 | -1.76 |
| 6992 | CC(=O)C(C(F)F)F                   | C02530897 | -11.45 | -1.47 | -12.36 | 4.69 | -2.3  |
| 6993 | C1CC(=O)N(C1)CCl                  | C03865397 | -11.45 | -0.76 | -14.67 | 6.29 | -2.3  |
| 6994 | c1ccc(c1)c2cnc2)N                 | C04271694 | -11.45 | -1.17 | -14.55 | 4.92 | -0.64 |
| 6995 | C1=C(C(=C(C1=O)Cl)Cl)[O-]         | C04390919 | -11.45 | -4.9  | -8.87  | 3.39 | -1.06 |
| 6996 | C1CSCC1=O                         | C04521395 | -11.45 | -0.5  | -12.39 | 3.6  | -2.16 |
| 6997 | C(CSC(=[NH2+])N)C#N               | C04721608 | -11.45 | -1.72 | -15.19 | 6.42 | -0.97 |
| 6998 | COc1ccc(c(=O)[nH]1)[N+](=O)[O-]   | C05285616 | -11.45 | -1.22 | -15.05 | 3.66 | 1.16  |
| 6999 | c1cc([nH]c1)c2ccc2                | C05749268 | -11.45 | 1.19  | -16.47 | 4.8  | -0.96 |
| 7000 | c1c(nsn1)OC[C@H]2CO2              | C12505812 | -11.45 | -1.54 | -16.02 | 4.43 | 1.68  |
| 7001 | Cn1c(nnn1)S#CCO                   | C17087008 | -11.45 | -1.9  | -19.78 | 9.83 | 0.4   |
| 7002 | CN1C(=O)C(=O)N(C1=O)CC(=O)OC      | C20297290 | -11.45 | -0.55 | -17.51 | 8.26 | -1.65 |
| 7003 | c1cc(cc(c1)F)CNC(=O)N             | C20473623 | -11.45 | -0.02 | -20.02 | 8.95 | -0.36 |
| 7004 | CCCNc1c(ccc1)F                    | C20476107 | -11.45 | 0.41  | -11.07 | 2.96 | -3.75 |
| 7005 | c1c(ncn1)Cl)C=O                   | C26461796 | -11.45 | -1.39 | -12.18 | 4.09 | -1.97 |
| 7006 | Cc1nc(cs1)C#N                     | C00166074 | -11.44 | -0.58 | -14.8  | 5.92 | -1.99 |
| 7007 | CCOc1c[nH]nc1C                    | C00401174 | -11.44 | -2.8  | -13.87 | 4.62 | 0.61  |
| 7008 | CN1C(=O)CC(=O)NC1=O               | C01574468 | -11.44 | 0.49  | -18.21 | 5.86 | 0.42  |
| 7009 | CN(C)N=C                          | C01604464 | -11.44 | -1.21 | -12.29 | 2.96 | -0.91 |
| 7010 | COC(=O)Nc1cc2csc2n1               | C01610328 | -11.44 | -0.98 | -18.67 | 7.79 | 0.42  |
| 7011 | COCC/C=C/CCl                      | C01640003 | -11.44 | -0.75 | -9.91  | 2.16 | -2.95 |
| 7012 | CC(C)OC(=O)N(C)[N+](=O)[O-]       | C01646516 | -11.44 | -2.07 | -11.52 | 3.69 | -1.54 |
| 7013 | COc1cccc(=O)cc1                   | C01686793 | -11.44 | -3.53 | -12.49 | 7.23 | -2.65 |
| 7014 | CC(C)OC(=S)S                      | C01706841 | -11.44 | -1.62 | -11.4  | 3.96 | -2.39 |
| 7015 | c1ccc(cc1)C(=O)OCC#N              | C01715383 | -11.44 | 1.43  | -13.96 | 5.58 | -4.5  |
| 7016 | C=C1CCOC1=O                       | C01740871 | -11.44 | -1.47 | -14.47 | 6.83 | -2.33 |

|      |                               |           |        |       |        |       |       |
|------|-------------------------------|-----------|--------|-------|--------|-------|-------|
| 7017 | c1ccc(c(c1)C(=O)Cl)O          | C01997104 | -11.44 | 0.34  | -16.54 | 4.84  | -0.08 |
| 7018 | COC(=O)Nc1cccc(c1)O           | C02019518 | -11.44 | -0.38 | -19.98 | 7.56  | 1.35  |
| 7019 | CCOC(=O)N[N+](=O)[O-]         | C02032486 | -11.44 | -4.46 | -16.95 | 8.89  | 1.09  |
| 7020 | C(C(C(F)F)(F)OC(F)F           | C02560092 | -11.44 | -1.59 | -10.99 | 4.67  | -3.53 |
| 7021 | C1C(=O)NC(=S)S1               | C03875936 | -11.44 | -2.08 | -16    | 6.49  | 0.14  |
| 7022 | CCc1ccc(cc1)N=O               | C04962854 | -11.44 | -2.14 | -11.74 | 3.24  | -0.8  |
| 7023 | [C@H]1CCCO1                   | C05226872 | -11.44 | -0.01 | -11.22 | 1.59  | -1.8  |
| 7024 | Cc1[nH]c(cn1)[C@H](C(F)F)F)O  | C05285761 | -11.44 | -4.03 | -13.9  | 6.98  | -0.49 |
| 7025 | c1c(c[nH]1)[N+](=O)[O-]C#N    | C05491120 | -11.44 | 0.42  | -17.22 | 6.06  | -0.7  |
| 7026 | [C@H](CO)N(N=O)O              | C05758863 | -11.44 | -3.4  | -14.25 | 4.81  | 1.41  |
| 7027 | c1ccc(c(c1)C(=O)S)O           | C05846849 | -11.44 | -0.25 | -16.5  | 4.89  | 0.43  |
| 7028 | CC(=O)Oc1cnc(s1)Br            | C12359407 | -11.44 | -0.82 | -15.11 | 4.96  | -0.46 |
| 7029 | c1cnc(c1)CC/C(=N/O)/N         | C12395541 | -11.44 | -3.49 | -14.78 | 6.48  | 0.36  |
| 7030 | c1ccc2c(c1)c(n[nH]2)C=O       | C14909878 | -11.44 | -3.88 | -14.04 | 8.61  | -2.14 |
| 7031 | C(C(=O)C(F)F)C(F)F            | C16082660 | -11.44 | 0.47  | -13.63 | 4.39  | -2.39 |
| 7032 | C1C2c2c(sc(n2)C=O)C1          | C20441872 | -11.44 | -3.45 | -10.72 | 5.35  | -2.62 |
| 7033 | [C@H](C(=O)c1ccco1)Cl         | C32005842 | -11.44 | 1.12  | -13.35 | 4.19  | -3.39 |
| 7034 | c1c(cc(cc1N)N)N               | C00133679 | -11.43 | -2.3  | -13.85 | 3.26  | 1.47  |
| 7035 | CCOCCBr                       | C01586364 | -11.43 | -0.25 | -10.98 | 2.13  | -2.34 |
| 7036 | C1C(CS1)Cl                    | C01674496 | -11.43 | -0.09 | -12.06 | 3.53  | -2.81 |
| 7037 | c1(c(c(=O)c(=O)c1=O)O)O       | C02556258 | -11.43 | -4.69 | -17.7  | 7.79  | 3.18  |
| 7038 | c1cc(c(cc1O)F)C(F)F           | C02560195 | -11.43 | -0.72 | -13.24 | 4.02  | -1.5  |
| 7039 | CC(=O)CSC                     | C02560605 | -11.43 | -1.06 | -13.53 | 5.52  | -2.35 |
| 7040 | Cc1ccc(o1)C(=O)N              | C02750187 | -11.43 | -3.66 | -13.37 | 5.71  | -0.11 |
| 7041 | c1c(csc1C(F)F)Br              | C04290564 | -11.43 | 0.06  | -13.37 | 2.88  | -1    |
| 7042 | c1c(cnc1Cl)C=O                | C06643293 | -11.43 | -0.02 | -14.55 | 5.4   | -2.26 |
| 7043 | C/C=C/CO                      | C12358664 | -11.43 | -2.08 | -11.65 | 2.3   | 0     |
| 7044 | Cc1c(cn(n1)C)Cl               | C16697473 | -11.43 | -2.3  | -10.59 | 4.16  | -2.69 |
| 7045 | c1cc(c(cc1F)F)O[C@H]C(=NH2+)N | C19519793 | -11.43 | 2.34  | -20.81 | 8.45  | -1.42 |
| 7046 | c1ccc(cc1)Cc2cncn2N           | C19785799 | -11.43 | 0.17  | -14.32 | 6.53  | -3.81 |
| 7047 | CC(=O)c1cccnc1N               | C19851162 | -11.43 | -2.28 | -13.19 | 5.56  | -1.52 |
| 7048 | c1c(c(cc(c1)O)O)N             | C21303657 | -11.43 | -2.39 | -16.85 | 5.82  | 1.99  |
| 7049 | c1cc(ncc1C(=O)N)Cl            | C00163243 | -11.42 | -2.95 | -14.52 | 6.03  | 0.02  |
| 7050 | c1cc(ccc1C(=S)N)F             | C00165748 | -11.42 | -1.19 | -16.17 | 8.8   | -2.87 |
| 7051 | C/C=C/[C@H]1C=CC(=O)O1        | C01668309 | -11.42 | -0.34 | -15.2  | 7.77  | -3.65 |
| 7052 | Cc1ccc(cc1)OCC#C              | C01869848 | -11.42 | -2.67 | -10.44 | 3.79  | -2.11 |
| 7053 | C=CCCC#N                      | C02034589 | -11.42 | 0.02  | -12.79 | 4.32  | -2.97 |
| 7054 | COP1OCCO1                     | C02038442 | -11.42 | -0.49 | -13.97 | 3.81  | -0.78 |
| 7055 | c1cc(c(c(c1)F)C(=NH2+)NO)F    | C02547181 | -11.42 | -2.11 | -17.4  | 8.68  | -0.58 |
| 7056 | c1cc(ccc1NN)[N+](=O)[O-]      | C03860923 | -11.42 | -2.27 | -14.09 | 6.91  | -1.98 |
| 7057 | C1=C[C@H]([C@H]1C(=C1)F)O)O   | C04262267 | -11.42 | -1.45 | -15.52 | 4.8   | 0.74  |
| 7058 | Cn1cc(nc1)C#N                 | C04262658 | -11.42 | -2.48 | -14.06 | 8.35  | -3.23 |
| 7059 | Cc1ccc(c(c1)F)NC(=S)N         | C12505971 | -11.42 | -0.47 | -15.93 | 8.17  | -3.19 |
| 7060 | c1c[nH]c(=O)c(c1N)Cl          | C14982027 | -11.42 | -1.92 | -16.65 | 4.94  | 2.21  |
| 7061 | c1cnc(cn1)NC2CC2              | C18857979 | -11.42 | -0.74 | -12.69 | 3.83  | -1.82 |
| 7062 | CCc1cc(cs1)CO                 | C19754888 | -11.42 | -1.49 | -12.46 | 4.29  | -1.76 |
| 7063 | COC(=O)Nc1ccc(cc1)N)F         | C19815646 | -11.42 | -3.9  | -15.03 | 8.14  | -0.63 |
| 7064 | c1cc(sc1)SCC(=NH2+)N          | C20078234 | -11.42 | 0.62  | -19.92 | 9.57  | -1.68 |
| 7065 | C1[C@H]([C@H]1F)C(=O)Cl       | C21989325 | -11.42 | -0.03 | -13.1  | 4.33  | -2.63 |
| 7066 | CC(=O)OCCOCCl                 | C26896288 | -11.42 | -0.52 | -14.44 | 5.87  | -2.34 |
| 7067 | c1cc2n(c1)CCN=C2              | C00185897 | -11.41 | 0.56  | -16.78 | 3.73  | 1.09  |
| 7068 | C1SCCS1                       | C00901172 | -11.41 | 0.54  | -10.43 | 1.65  | -3.18 |
| 7069 | c1cncn(n1)NCCCl               | C01557212 | -11.41 | -1.53 | -13.8  | 6.59  | -2.67 |
| 7070 | C=C(CO)Cl                     | C01562139 | -11.41 | -2.53 | -11.96 | 3.08  | 0     |
| 7071 | CC(=O)Cl                      | C01613258 | -11.41 | -1.18 | -12.26 | 4.43  | -2.4  |
| 7072 | C1CS[C@H]1O                   | C01763631 | -11.41 | -1.3  | -12.27 | 2.68  | -0.52 |
| 7073 | CCOC(=O)[C@H]([C@H]1C)C#N)F   | C02035879 | -11.41 | -0.9  | -12.3  | 5     | -3.21 |
| 7074 | C=C(c1cccs1)NN                | C02519476 | -11.41 | -3.92 | -8.29  | 2.66  | -1.87 |
| 7075 | c1c(cc(c(c1)F)O)Br)F          | C02545225 | -11.41 | 0.33  | -13.98 | 2.24  | 0     |
| 7076 | C1COCC(=C1)CO                 | C05190737 | -11.41 | -1.01 | -15.74 | 3.45  | 1.89  |
| 7077 | CCNC(=O)C(F)F                 | C05471984 | -11.41 | -0.87 | -13.13 | 3.44  | -0.85 |
| 7078 | Cc1ccc(cc1)NC(=O)NN           | C06300383 | -11.41 | -0.45 | -22.49 | 6.93  | 4.6   |
| 7079 | C1C(=O)NC(=S)NC1=O            | C08727446 | -11.41 | -3.42 | -16.64 | 7.67  | 0.98  |
| 7080 | C/C(=N/O)/C1CC1               | C13509755 | -11.41 | -1.48 | -11.86 | 3.2   | -1.27 |
| 7081 | c1cc2c[nH]nc2cc1NC(=S)N       | C13598839 | -11.41 | -1.92 | -14    | 5.64  | -1.13 |
| 7082 | C(CO)n1nc(n1)N                | C16954938 | -11.41 | -3.54 | -15    | 6.19  | 0.95  |
| 7083 | CNC(=O)Oc1ccc[nH]c1=O         | C17064144 | -11.41 | -0.32 | -23.16 | 10.19 | 1.87  |
| 7084 | c1ccc2c(c1)CN(C2)N            | C19171334 | -11.41 | -1.23 | -11.75 | 2.99  | -1.43 |
| 7085 | C1CNCC1(F)F                   | C19735230 | -11.41 | -1.02 | -11.76 | 1.84  | -0.46 |
| 7086 | CCSCC(=NH2+)N                 | C19870377 | -11.41 | -4.49 | -13.65 | 7.43  | -0.71 |
| 7087 | C=C/C=C/CCO                   | C31776272 | -11.41 | 0.53  | -13.27 | 3.16  | -1.84 |
| 7088 | c1cc(cc(c1)O)CO               | C00388761 | -11.4  | -1.99 | -15.02 | 4.73  | 0.88  |
| 7089 | CNC(=O)Nc1ccc(cc1)O           | C01601880 | -11.4  | -0.07 | -22.93 | 8.51  | 3.08  |
| 7090 | CC[C@H]([C(F)F)Cl)O           | C01675523 | -11.4  | -2.06 | -11    | 1.61  | 0.05  |
| 7091 | C1CCC(C1)OC(=O)Cl             | C02516857 | -11.4  | 1.84  | -13.86 | 1.76  | -1.14 |
| 7092 | C=CCCCC#N                     | C02517086 | -11.4  | -0.95 | -12.56 | 4.78  | -2.68 |
| 7093 | c1cc(c(c(c1)F)F)[N+](=O)[O-]  | C02565580 | -11.4  | -2.73 | -14.46 | 8.1   | -2.31 |
| 7094 | COC(=O)[C@H](C(F)F)F)O        | C02576920 | -11.4  | -1.66 | -12.87 | 3.87  | -0.73 |
| 7095 | c1[nH]c(c(n1)C(=O)N)N         | C03861263 | -11.4  | -3.15 | -18.71 | 8.92  | 1.53  |
| 7096 | C(C/C(=N/N)/N)CCl             | C04203891 | -11.4  | -1.67 | -13.38 | 4.51  | -0.87 |
| 7097 | C1C(=O)OCC(=O)O1              | C04284649 | -11.4  | -0.74 | -15.48 | 6.36  | -1.54 |
| 7098 | CC1=C[C@H]([C@H]1)O           | C04528632 | -11.4  | -0.86 | -10.99 | 1.87  | -1.42 |
| 7099 | C1=CNC(=N[C@H]1)S             | C05496923 | -11.4  | -4.85 | -13.86 | 4.37  | 2.94  |
| 7100 | C=C[C@H](C#C)O                | C12363481 | -11.4  | -0.05 | -12.95 | 2.33  | -0.72 |
| 7101 | c1[nH]c(nc(=O)[nH+])1N        | C18180628 | -11.4  | -4.94 | -17.25 | 10.8  | 0     |
| 7102 | c1cc(ncc1C#N)NN               | C20285773 | -11.4  | -1.81 | -15.49 | 7.19  | -1.29 |
| 7103 | c1cc(c(cc1F)F)Nc2nccn2)N      | C00088763 | -11.39 | -1.04 | -8.72  | 4.69  | -6.33 |
| 7104 | c1csc(n1)NC=C(C#N)C#N         | C00093624 | -11.39 | -1.97 | -13.02 | 6.94  | -3.33 |
| 7105 | Cc1cc[nH]1)O                  | C01471020 | -11.39 | -4.12 | -14.46 | 4.99  | 2.2   |
| 7106 | C1COCC1                       | C01692451 | -11.39 | 0.39  | -11.1  | 1.21  | -1.88 |

|      |                                |           |        |       |        |       |       |
|------|--------------------------------|-----------|--------|-------|--------|-------|-------|
| 7107 | C1C2COP(O)O2                   | C01765038 | -11.39 | -1.45 | -13.56 | 3.38  | 0.23  |
| 7108 | CNC(=O)c1c(cn(n1)C)N           | C02537279 | -11.39 | -4.33 | -15.57 | 7.41  | 1.1   |
| 7109 | c1cn(nc1C(F)F)F)CC#N           | C02537523 | -11.39 | -4.49 | -15.98 | 12.14 | -3.05 |
| 7110 | CCOC(C(F)F)F)F                 | C02539799 | -11.39 | -1.09 | -11.01 | 2.67  | -1.96 |
| 7111 | C(C#N)C(=S)N                   | C05112695 | -11.39 | -2.92 | -13.71 | 5.53  | -0.29 |
| 7112 | c1c2c([nH]n1)ncn(c2=O)N        | C05479371 | -11.39 | -4.33 | -20.52 | 9.69  | 3.76  |
| 7113 | c1c(c[nH]1)F                   | C06091386 | -11.39 | -2.17 | -13.35 | 4.04  | 0.1   |
| 7114 | CC[C@H](C)ON=O                 | C06129975 | -11.39 | -1.04 | -10.1  | 2.48  | -2.73 |
| 7115 | C1[C@H](CSC(=[NH+1])N)Br       | C08614816 | -11.39 | -0.92 | -11.28 | 2.08  | -1.27 |
| 7116 | c1c(c(=O)c(c[nH]1)Cl)Cl        | C11757584 | -11.39 | -0.48 | -14.64 | 2.52  | 1.21  |
| 7117 | C#CC[C@H](c1cccc1)O            | C12361905 | -11.39 | -0.26 | -11.52 | 3.59  | -3.2  |
| 7118 | c1c(c(c(n1)N)[O-])F)Cl         | C21981847 | -11.39 | -4.46 | -15.24 | 7.98  | 0.33  |
| 7119 | CCc1cc(no1)CO                  | C26547721 | -11.39 | -1.86 | -14.51 | 5.62  | -0.64 |
| 7120 | C1C=C(C(=O)O1)Br               | C30677954 | -11.39 | -3.09 | -14.45 | 8.56  | -2.41 |
| 7121 | Cc1ccc(s1)/C=N/O               | C00334142 | -11.38 | -2.91 | -12.79 | 5.84  | -1.53 |
| 7122 | COCCBr                         | C01627348 | -11.38 | -0.18 | -11.82 | 2.17  | -1.55 |
| 7123 | CCOC(C=O)C                     | C01697403 | -11.38 | 0.71  | -12.94 | 3.86  | -3.02 |
| 7124 | Cc1c(=O)n(c(n1)N)N             | C02022931 | -11.38 | -5.87 | -15.93 | 7.84  | 2.58  |
| 7125 | CCCC(=O)C=C                    | C02039390 | -11.38 | -0.38 | -11.59 | 3.67  | -3.08 |
| 7126 | c1c(cn(n1)CC(F)F)F)N+](=O)[O-] | C02534799 | -11.38 | -3.65 | -13.02 | 8.73  | -3.45 |
| 7127 | COC1=NC=CC1                    | C04268437 | -11.38 | -2    | -12.68 | 2.76  | 0.55  |
| 7128 | c1cn[nH]c1CO                   | C04343992 | -11.38 | -4.06 | -14.44 | 5.93  | 1.19  |
| 7129 | CCCCOC(=O)CS                   | C04501341 | -11.38 | 2.78  | -14.42 | 3.93  | -3.68 |
| 7130 | c1cn(c(=O)[nH]c1=O)CCBr        | C04785827 | -11.38 | -2.44 | -16.85 | 9.48  | -1.59 |
| 7131 | CCNc1cccc1N                    | C05139781 | -11.38 | -4.36 | -10.88 | 2.36  | 1.5   |
| 7132 | c1cc(cc(c1)F)C(=O)C=O          | C05240957 | -11.38 | -0.66 | -14.38 | 7.56  | -3.9  |
| 7133 | c1cc(c(cc1)C=N)O)O             | C05723016 | -11.38 | -3.44 | -16.64 | 6.68  | 2.02  |
| 7134 | Cc1nc(no1)CC#N                 | C09596237 | -11.38 | -1.8  | -16.57 | 7.77  | -0.78 |
| 7135 | COC(=O)c1c([nH]cn1)N           | C17419483 | -11.38 | -0.42 | -16.73 | 7.22  | -1.45 |
| 7136 | c1cc(cc(c1)F)C@H]2CO2          | C18899433 | -11.38 | -2.4  | -11.33 | 5.08  | -2.73 |
| 7137 | CCOC(=O)c1cn(c([nH]1)N         | C19091522 | -11.38 | -1.08 | -13.89 | 6.14  | -2.55 |
| 7138 | C1CC(C1)N=C=O                  | C19477720 | -11.38 | 0.68  | -13.13 | 1.71  | -0.64 |
| 7139 | c1c(cnc1Cl)CO                  | C21303204 | -11.38 | -1.86 | -13.68 | 4.59  | -0.43 |
| 7140 | Cc1ccc(n1C)C#N                 | C00160266 | -11.37 | 0.44  | -12.54 | 4.26  | -3.53 |
| 7141 | c1c(=O)[nH]c(=O)[nH]c11        | C01682350 | -11.37 | -1.25 | -15.46 | 5.06  | 0.28  |
| 7142 | CCSCCBr                        | C01687819 | -11.37 | -0.69 | -8.01  | 1.08  | -3.75 |
| 7143 | c1ccc2c(c1)OS(=O)O2            | C01710890 | -11.37 | -2.61 | -18.29 | 11.26 | -1.74 |
| 7144 | C[C@H](C=C)O                   | C01758745 | -11.37 | -1.9  | -11.37 | 2.01  | -0.11 |
| 7145 | CC[C@H](CC#C)O                 | C01765496 | -11.37 | -0.31 | -12.73 | 3.07  | -1.39 |
| 7146 | Cc1cccn1                       | C01845812 | -11.37 | -1.77 | -14.01 | 4.32  | 0.09  |
| 7147 | c1c(cc(c1F)O)F)Br              | C02560118 | -11.37 | -0.21 | -13.72 | 2.45  | 0.1   |
| 7148 | c1(c(c(c1F)F)F)F)O)O           | C02572594 | -11.37 | -3.4  | -13.03 | 4.86  | 0.2   |
| 7149 | C(=O)C(=O)C(F)F)F              | C02598062 | -11.37 | -0.91 | -14.03 | 5.57  | -2    |
| 7150 | c1c(c(n[nH]1)O)N+](=O)[O-]     | C04149782 | -11.37 | -5.93 | -16.87 | 9.72  | 1.7   |
| 7151 | CCOCCO                         | C04283944 | -11.37 | -2.49 | -12.57 | 3.51  | 0.19  |
| 7152 | C(C(=O)Cl)F)F                  | C04329299 | -11.37 | -1.2  | -11.51 | 2.88  | -1.54 |
| 7153 | C1[C@H](CC=C1)C#N              | C04787443 | -11.37 | 0.36  | -11.36 | 3.36  | -3.73 |
| 7154 | c1csc(n1)NC2=NC(=O)CS2         | C05778643 | -11.37 | -0.87 | -18.18 | 9.97  | -2.29 |
| 7155 | c1cc(c(c1O)F)C(=O)F            | C12956563 | -11.37 | -3.13 | -14.59 | 7.35  | -1    |
| 7156 | c1cnccc1NC(=O)C(F)F)F          | C13208290 | -11.37 | -3.67 | -11.21 | 5.07  | -1.56 |
| 7157 | CC(=O)N1CCCC1=O                | C14684424 | -11.37 | -1.78 | -15.28 | 6.02  | -0.33 |
| 7158 | c1nc(c(s1)C=O)Cl               | C14982499 | -11.37 | -1.66 | -13.36 | 5.18  | -1.54 |
| 7159 | c1cc(c(=O)[nH]c1)CO            | C19091101 | -11.37 | -4    | -16.63 | 8.5   | 0.76  |
| 7160 | CC(=O)Cc1cccc1N                | C19801521 | -11.37 | -2.07 | -13.3  | 6.87  | -2.87 |
| 7161 | C[C@H](C(=[NH2+])N)N+](=O)[O-] | C26898079 | -11.37 | -6.68 | -14.95 | 10.94 | -0.67 |
| 7162 | COC(=O)c1c(ccc1F)N             | C00164468 | -11.36 | -3.14 | -12.43 | 6.61  | -2.41 |
| 7163 | c1cc(ccc1CON)Cl                | C00169388 | -11.36 | -1.27 | -10.82 | 2.88  | -2.15 |
| 7164 | CNc1nccc(n1)N                  | C00331866 | -11.36 | 0     | -18.75 | 4.97  | 2.41  |
| 7165 | c1cc(c(cc1Cl)Cl)O              | C00388057 | -11.36 | -1.26 | -10.72 | 2.55  | -1.93 |
| 7166 | C1CN(C(=O)N1)C(=O)CC1          | C00806258 | -11.36 | -2.34 | -15.3  | 6.55  | -0.28 |
| 7167 | CC(=O)C(=O)N                   | C01581119 | -11.36 | -2.7  | -13.65 | 3.83  | 1.16  |
| 7168 | c1c(cc(c(c1F)N+](=O)[O-])F)F   | C01706148 | -11.36 | -1.25 | -11.06 | 4.52  | -2.95 |
| 7169 | C[C@H](CC1)N+](=O)[O-]         | C01758981 | -11.36 | 0.49  | -14.13 | 5.11  | -2.83 |
| 7170 | C1CCC(C1)C(=O)Cl               | C02242641 | -11.36 | 0.41  | -10.44 | 2.08  | -3.41 |
| 7171 | C1C[C@H](OC1)CC#N              | C04207146 | -11.36 | -0.54 | -15.18 | 6.56  | -2.2  |
| 7172 | Cc1ncc(n1C)Br                  | C04352760 | -11.36 | -0.9  | -11.86 | 4.43  | -3.03 |
| 7173 | [H]N=c/1\onc(s1)c2c(non2)N     | C04481985 | -11.36 | -1.86 | -13.91 | 2.38  | 2.02  |
| 7174 | C(C(F)F)FS                     | C04501362 | -11.36 | -0.67 | -10.94 | 2     | -1.75 |
| 7175 | Cn1cnn(c1=O)C                  | C05425304 | -11.36 | -3.46 | -14.58 | 9.13  | -2.45 |
| 7176 | C(=O)(C(O)(O)O)C(F)F)F         | C08698296 | -11.36 | -4.66 | -13.43 | 4.29  | 2.45  |
| 7177 | c1ccc(c(c1)C(=O)C)Cl)N         | C15021946 | -11.36 | -1.99 | -11.32 | 4.88  | -2.93 |
| 7178 | [C@H](C(=O)F)F)Cl              | C16159210 | -11.36 | -0.02 | -12.76 | 2.92  | -1.5  |
| 7179 | c1cc(ccc1CCC=O)F               | C19682816 | -11.36 | -3.79 | -9.44  | 6.22  | -4.35 |
| 7180 | COC(=O)Nc1cc(ccc1F)N           | C19815589 | -11.36 | 0.02  | -17.4  | 6.59  | -0.58 |
| 7181 | COCCNc1ccc(cc1F)F              | C20053295 | -11.36 | 0.85  | -13.05 | 3.36  | -2.52 |
| 7182 | COCCNc1ncccn1                  | C21511690 | -11.36 | 0.13  | -14.32 | 5.26  | -2.42 |
| 7183 | Cc1c(non1)CS                   | C23993717 | -11.36 | -1.14 | -14.79 | 5.97  | -1.4  |
| 7184 | c1nc(c(c(n1)NN)F)CF            | C26466574 | -11.36 | -1.29 | -14.08 | 5.43  | -1.43 |
| 7185 | CSc1ncc(n1)O                   | C00392495 | -11.35 | 0.35  | -18.34 | 4.82  | 1.82  |
| 7186 | c1c(c(nc(=O)[nH]1)N)Br         | C00967468 | -11.35 | -3.19 | -19.43 | 10.2  | 1.07  |
| 7187 | C=C1C=CC1=O                    | C01558090 | -11.35 | -1.5  | -14.28 | 5.47  | -1.04 |
| 7188 | CC(=O)Nc1c(cc(cc1F)N)F         | C01592344 | -11.35 | 0.07  | -19.88 | 8.21  | 0.25  |
| 7189 | CCOC(=O)C=O                    | C01681280 | -11.35 | -0.81 | -15.32 | 6.95  | -2.17 |
| 7190 | C(CCC)CC#N                     | C01693305 | -11.35 | -2.05 | -11.27 | 5.58  | -3.61 |
| 7191 | C[C@H](C(=O)OC)NC(=O)C(F)F)F   | C02145546 | -11.35 | 1.29  | -14.34 | 3.77  | -2.07 |
| 7192 | C#CCCC#N                       | C02390304 | -11.35 | -1.04 | -12.01 | 4.62  | -2.92 |
| 7193 | c1cc(c(cc1F)F)NC(=S)S          | C02565033 | -11.35 | -2.24 | -14.36 | 4.92  | 0.34  |
| 7194 | Cc1c(c(n[nH]1)N)Br             | C04244008 | -11.35 | -4.88 | -11.95 | 6.01  | -0.53 |
| 7195 | Cc1c(ccn1)C(=O)Cl              | C04277260 | -11.35 | -1.33 | -14.23 | 4.5   | -0.29 |
| 7196 | [H]N=C(N)/S[C@H]1CCC[C@H]1O    | C04429056 | -11.35 | 0.06  | -15    | 3.3   | 0.29  |

|      |                                   |           |        |       |        |      |       |
|------|-----------------------------------|-----------|--------|-------|--------|------|-------|
| 7197 | C1CCC(=CC1)C#N                    | C04521340 | -11.35 | 1.48  | -14.61 | 3.5  | -1.73 |
| 7198 | CC(C)CCN=O                        | C05359504 | -11.35 | -1.72 | -12.46 | 2.96 | -0.13 |
| 7199 | CC/C=N/N(C)C                      | C05734086 | -11.35 | -0.27 | -12.93 | 2.7  | -0.85 |
| 7200 | C1CC(=O)OC1=O                     | C08681668 | -11.35 | -4.48 | -14.62 | 6.81 | 0.94  |
| 7201 | COCCCN=C=O                        | C11802362 | -11.35 | -1.88 | -13.6  | 3.27 | 0.85  |
| 7202 | C1C[C@H](OC1)CN=C=O               | C11802363 | -11.35 | -0.91 | -14.54 | 3.71 | 0.38  |
| 7203 | Cn1ccc(n1)                        | C12370361 | -11.35 | -0.77 | -12.8  | 4.58 | -2.36 |
| 7204 | C1CC(=O)CCC1C(=O)Cl               | C16124708 | -11.35 | -0.28 | -13.42 | 5.43 | -3.08 |
| 7205 | [C@H]1(C(=O)C(=O)NC(=N1)N)[NH3+]  | C16891331 | -11.35 | -5.07 | -17.79 | 8.91 | 2.61  |
| 7206 | CCOC(=O)C1c(c[nH]1)N              | C17946019 | -11.35 | 0.77  | -15.74 | 4.22 | -0.61 |
| 7207 | C1CC1c2nc([nH]n2)N                | C18194322 | -11.35 | -3.11 | -12.54 | 7.36 | -3.06 |
| 7208 | c1cc2c(cc1Cl)C(F)F                | C21985250 | -11.35 | -2.86 | -8.42  | 3.15 | -3.22 |
| 7209 | Cc1cc[nH]c1C=O                    | C26898381 | -11.35 | -2.16 | -12.77 | 5.49 | -1.9  |
| 7210 | CNC(=S)Nc1ccc(cc1)F               | C00072259 | -11.34 | 0.45  | -17.61 | 9.33 | -3.5  |
| 7211 | CCOC(=O)c1ccc1                    | C00164474 | -11.34 | 2.19  | -15.37 | 5.11 | -3.26 |
| 7212 | c1cc(ccc1[N+](=O)[O-])SN          | C01583414 | -11.34 | -0.47 | -12.97 | 4.84 | -2.74 |
| 7213 | c1c(c(cc(c1Cl)F)Cl)N              | C01706155 | -11.34 | -3.85 | -9.95  | 2.17 | 0.28  |
| 7214 | CCC(=C)C=O                        | C01845569 | -11.34 | -1.45 | -12.04 | 4.5  | -2.35 |
| 7215 | C1COC(O1)C(F)F                    | C02525293 | -11.34 | -2.25 | -11.69 | 3.72 | -1.12 |
| 7216 | CC(=O)C1ccc(c1)F                  | C02600072 | -11.34 | -1.38 | -11.67 | 6.14 | -4.43 |
| 7217 | Cc1cc(nn1)N[N+](=O)[O-]           | C05003197 | -11.34 | -5.17 | -12.67 | 8.63 | -2.13 |
| 7218 | c1cc2c(c1)Onc[nH]2                | C05286233 | -11.34 | -3.64 | -14.74 | 8.13 | -1.09 |
| 7219 | c1c(nc(c1Cl)Cl)N                  | C08698162 | -11.34 | -1.68 | -12.77 | 4.19 | -1.08 |
| 7220 | CCSc1nc(sn1)N                     | C17173608 | -11.34 | -4.91 | -8.36  | 3.88 | -1.94 |
| 7221 | C1CC(=O)N(C1)CC#N                 | C19508742 | -11.34 | -1.9  | -16.63 | 9.43 | -2.23 |
| 7222 | CC(=O)C1=CNCCC1                   | C20280751 | -11.34 | -3.73 | -11.49 | 5.91 | -2.03 |
| 7223 | COCC(=O)COCCC=C                   | C20519084 | -11.34 | -0.8  | -13.02 | 5.73 | -3.24 |
| 7224 | COCC1ccc(cc1)N                    | C22204322 | -11.34 | -1.23 | -12.66 | 4.02 | -1.47 |
| 7225 | c1c(cc(n1)Br)C=O                  | C30678087 | -11.34 | -3.85 | -15.32 | 8.14 | -0.31 |
| 7226 | Cc1cn2ccccc2n1                    | C00151684 | -11.33 | -1.59 | -12.36 | 6.92 | -4.3  |
| 7227 | c1cc(cnc1)C(=O)NN                 | C00152498 | -11.33 | 2.44  | -21.24 | 7.12 | 0.35  |
| 7228 | Cc1[n-]c([nH]1)NC(=O)N            | C01667220 | -11.33 | -2.3  | -20.08 | 7.52 | 3.53  |
| 7229 | CC[C@H](C(=C)C)O                  | C02038914 | -11.33 | -1.13 | -10.49 | 1.46 | -1.17 |
| 7230 | C=CCOC(=O)C[C@H](C=C)O            | C02159825 | -11.33 | -0.68 | -12.13 | 3.55 | -2.07 |
| 7231 | c1cc(c(c1)Br)O                    | C02510737 | -11.33 | -0.46 | -14.89 | 3.56 | 0.45  |
| 7232 | c1cc(c(c1)F)C(=O)N=C=O            | C02568127 | -11.33 | 2.87  | -19.24 | 5.93 | -0.89 |
| 7233 | C/(C=C/Br)Br                      | C02584386 | -11.33 | -3.11 | -11.14 | 3.3  | -0.38 |
| 7234 | c1ccc(cc1)C[P@H](=O)[O-]          | C03958319 | -11.33 | -1.8  | -15.34 | 7.68 | -1.86 |
| 7235 | c1c(nnn1c2c(non2)N)[N+](=O)[O-]   | C04171179 | -11.33 | -0.7  | -14.23 | 5.42 | -1.82 |
| 7236 | c1[nH]c(c(n1)[N+](=O)[O-])Br      | C04714979 | -11.33 | -3.61 | -11.45 | 6.94 | -3.2  |
| 7237 | c1ccc(cc1)NC(=O)C=N/O             | C05933783 | -11.33 | -4.31 | -17.4  | 8.9  | 1.49  |
| 7238 | CCOCCI                            | C06661811 | -11.33 | -0.93 | -10.76 | 1.91 | -1.56 |
| 7239 | c12c([nH]c(=O)[nH]1)nc([nH]c2=O)N | C13527382 | -11.33 | -4.88 | -14.95 | 6.86 | 1.64  |
| 7240 | CC(C)OC(=O)OCCI                   | C21299034 | -11.33 | -1.52 | -10.79 | 4.19 | -3.22 |
| 7241 | CC(C)(C#N)Nn1cncn1                | C00256496 | -11.32 | -2.6  | -14.94 | 9.01 | -2.79 |
| 7242 | Cc1csc1C=O                        | C00334132 | -11.32 | 1.28  | -13.77 | 3.98 | -2.8  |
| 7243 | Cc1nc2ccnnc2n1                    | C01571375 | -11.32 | -1.04 | -15.74 | 6.09 | -0.63 |
| 7244 | C1CCC(C1)CO                       | C01674839 | -11.32 | -0.88 | -11.29 | 1.84 | -0.98 |
| 7245 | CCOC(=O)CC=C                      | C01676796 | -11.32 | -0.64 | -12.19 | 3.62 | -2.11 |
| 7246 | Cc1ccccc1[N+](=O)[O-]             | C01700065 | -11.32 | -2.61 | -9.9   | 5.42 | -4.22 |
| 7247 | C(=N/NC(=O)N)C(=O)N               | C04266474 | -11.32 | -3.68 | -17.49 | 8.71 | 1.14  |
| 7248 | CCOC(=O)c1c([nH]n1)C              | C05285437 | -11.32 | -0.21 | -14.26 | 4.6  | -1.45 |
| 7249 | C/C=NN(C)C=O                      | C05353490 | -11.32 | -2.17 | -13.62 | 5.96 | -1.49 |
| 7250 | c1c([nH]n1)O                      | C06452783 | -11.32 | -3.1  | -13.97 | 4.78 | 0.96  |
| 7251 | c1c(c(nc(n1)N)N)CO                | C13281672 | -11.32 | -2.84 | -16.02 | 6.2  | 1.33  |
| 7252 | c1cnccc1CC[NH2+]                  | C19168812 | -11.32 | 0.17  | -15.38 | 4.46 | -0.55 |
| 7253 | c1ccc2c(c1)C[C@H](O2)CN[NH3+]     | C19272957 | -11.32 | -2.01 | -11.55 | 3.6  | -1.36 |
| 7254 | c1cc(c(cc1Cl)N=C=O)F              | C19511315 | -11.32 | -0.49 | -10.89 | 2.33 | -2.27 |
| 7255 | c1c(cc(cc1F)NCC(F)F)F             | C20054573 | -11.32 | -3.28 | -7.51  | 3.17 | -3.69 |
| 7256 | c1cc2c(cc1OC=O)OCO2               | C21300262 | -11.32 | -1.4  | -14.48 | 7.04 | -2.48 |
| 7257 | c1cnc(c(n1)C#N)Cl                 | C00161160 | -11.31 | -2.44 | -13.9  | 6.29 | -1.25 |
| 7258 | c1nc(nc1)c2c(non2)N               | C01052718 | -11.31 | -2.39 | -16.71 | 7.13 | 0.66  |
| 7259 | CCCc1ccc(cc1)N                    | C01683314 | -11.31 | -1.85 | -11.39 | 1.77 | 0.16  |
| 7260 | CC[C@H](C)[N+](=O)[O-]            | C01758996 | -11.31 | -1.29 | -14.36 | 5.59 | -1.23 |
| 7261 | C=CC(=O)OCCO                      | C01850233 | -11.31 | -1.82 | -15.23 | 6.04 | -0.3  |
| 7262 | C[C@H](C(=O)N)OC(=O)C             | C01871132 | -11.31 | -1.91 | -16.83 | 7.97 | -0.53 |
| 7263 | COCCCI                            | C02031633 | -11.31 | -0.97 | -11.32 | 2.39 | -1.41 |
| 7264 | c1[nH]c2c(n1)c(ncn2)NO            | C02558668 | -11.31 | -4.21 | -15.98 | 9.8  | -0.91 |
| 7265 | C=CCOC([C@H](F)Cl)F               | C04240027 | -11.31 | -0.24 | -11.14 | 2.17 | -2.1  |
| 7266 | c1cc(ccc1N=C=O)[N+](=O)[O-]       | C04262255 | -11.31 | -3.28 | -12.77 | 6.72 | -1.98 |
| 7267 | c1cc2c(cc1Cl)nc[nH]2              | C05425423 | -11.31 | -6.21 | -8.96  | 7.55 | -3.68 |
| 7268 | c1(c(non1)N)C(=NH+)(N)N           | C05510648 | -11.31 | -3.16 | -17.74 | 5.48 | 4.12  |
| 7269 | c1cc2c(cc1F)sc(=O)[nH]2           | C14984961 | -11.31 | -2.99 | -12.81 | 4.51 | -0.01 |
| 7270 | CC1=CC=C(N1)N)C                   | C30678136 | -11.31 | -3.43 | -10.12 | 4.09 | -1.85 |
| 7271 | c1ccc(cc1)c2cn[nH]n2              | C00027320 | -11.3  | 0.65  | -15.14 | 5.59 | -2.39 |
| 7272 | c1cc2c(cc[nH]2)cc1C#N             | C00157017 | -11.3  | -1.69 | -11.53 | 5.55 | -3.63 |
| 7273 | c1ccc(c1)C#N)Cl                   | C00157274 | -11.3  | -2.11 | -10.13 | 4.84 | -3.89 |
| 7274 | C(CCCCC)CCO                       | C01666983 | -11.3  | -1.63 | -10.7  | 2.66 | -1.62 |
| 7275 | Cn1c(=O)ccs1                      | C01849933 | -11.3  | -2.31 | -15.92 | 8.34 | -1.4  |
| 7276 | CCOC(=O)[C@H](C)Br                | C01866959 | -11.3  | -0.19 | -10.74 | 3.1  | -3.48 |
| 7277 | CC/C=C/COCC=O                     | C02010172 | -11.3  | -0.96 | -14.3  | 6.32 | -2.36 |
| 7278 | COCC(F)F                          | C02560087 | -11.3  | -1.51 | -11.27 | 2.71 | -1.23 |
| 7279 | CC(=O)OCCP                        | C02577210 | -11.3  | -2.04 | -10.89 | 3.88 | -2.25 |
| 7280 | C=CCOCCBr                         | C04203464 | -11.3  | -0.43 | -10.43 | 2.29 | -2.73 |
| 7281 | CCn1cn[nH]c1=S                    | C04218214 | -11.3  | -2.14 | -12.62 | 6.89 | -3.44 |
| 7282 | C1C/C(=N/O)NC1                    | C04579230 | -11.3  | -0.91 | -14.93 | 4.48 | 0.06  |
| 7283 | CSC(=O)c1cscn1                    | C12471791 | -11.3  | -1.38 | -13.18 | 5.18 | -1.93 |
| 7284 | c1cc(cnc1)[P@H](=O)O              | C13222833 | -11.3  | -2.95 | -16.94 | 8.54 | 0.05  |
| 7285 | c1cc(nc(c1)F)OC(F)F               | C16158729 | -11.3  | -0.13 | -17.16 | 7.51 | -1.52 |
| 7286 | CCc1c([nH]c(nc1=O)N)N             | C17040265 | -11.3  | -3.78 | -14.6  | 5.68 | 1.39  |



|      |                            |           |        |       |        |       |       |
|------|----------------------------|-----------|--------|-------|--------|-------|-------|
| 7287 | COC(=O)c1c[nH]nc1N         | C18217582 | -11.3  | -0.95 | -15.26 | 5.45  | -0.54 |
| 7288 | Cn1c(=O)cc(nc1[O-])Cl      | C18272301 | -11.3  | -0.83 | -14.51 | 4.95  | -0.92 |
| 7289 | Cc1ccccc1CNN               | C19171889 | -11.3  | 1.06  | -12.86 | 2.39  | -1.89 |
| 7290 | c1ccc(cc1)[C@H]2CO2        | C00901249 | -11.29 | 2.13  | -14.17 | 3.52  | -2.76 |
| 7291 | CCCCSCC                    | C01555231 | -11.29 | -0.59 | -10.85 | 1.09  | -0.94 |
| 7292 | CSCCO                      | C01577077 | -11.29 | -2.74 | -10.94 | 2.34  | 0.05  |
| 7293 | C=CCSc1ccsc1               | C01663925 | -11.29 | 0.18  | -13    | 2.23  | -0.69 |
| 7294 | CC(=O)c1ocnn1C             | C02536627 | -11.29 | 0.99  | -15.87 | 5.64  | -2.05 |
| 7295 | C1CC(=O)C=C1O              | C03861294 | -11.29 | -3.1  | -14.8  | 6.94  | -0.34 |
| 7296 | CCOC(=O)c1c(non1)C         | C04343169 | -11.29 | 2.31  | -13.69 | 2.74  | -2.64 |
| 7297 | CC(=O)C=C\OC               | C04758442 | -11.29 | -2.29 | -13.79 | 6.91  | -2.12 |
| 7298 | C/C=NNC(=O)N               | C05004577 | -11.29 | -4.33 | -14.76 | 6.46  | 1.33  |
| 7299 | Cc1c[nH]c(=O)nc1           | C14982937 | -11.29 | -3.63 | -15.79 | 5.96  | 2.16  |
| 7300 | c1cc2ncc(n2nc1)N           | C15020289 | -11.29 | -3.6  | -13.92 | 7.84  | -1.6  |
| 7301 | c1ccc(cc1)C=NNC=O          | C17111335 | -11.29 | -0.89 | -14.31 | 6.4   | -2.49 |
| 7302 | C=C(C#N)/C(=O)N\N          | C17286555 | -11.29 | -4.48 | -15.36 | 5.97  | 2.57  |
| 7303 | c1cc(oc1)/C=C\#N           | C17376753 | -11.29 | -1.02 | -14.67 | 7.6   | -3.2  |
| 7304 | Cc1ccc(s1)CNN              | C19413030 | -11.29 | -1.25 | -11.06 | 2.36  | -1.33 |
| 7305 | c1cc(oc1)c2cc([nH]n2)C=O   | C20270497 | -11.29 | 1.03  | -18.21 | 7.87  | -1.98 |
| 7306 | COC(=O)Cn1ccccc1=O         | C20302817 | -11.29 | -1.64 | -18.05 | 11.92 | -3.52 |
| 7307 | c1cc(sc1)[C@H](C(F)F)N     | C20475296 | -11.29 | -1.83 | -10.3  | 2.52  | -1.69 |
| 7308 | Cc1c(cccc1Cl)N             | C00157621 | -11.28 | -2.37 | -8.43  | 2.26  | -2.74 |
| 7309 | Cc1c(c(on1)C)C=O           | C00158502 | -11.28 | -1.95 | -12.06 | 5.2   | -2.47 |
| 7310 | C[C@@H]1C(=O)C=C(C1=O)[O-] | C01761600 | -11.28 | -4.25 | -15.28 | 8.36  | -0.12 |
| 7311 | CCOCc1ccc(cc1)N            | C02584494 | -11.28 | -1.45 | -10.03 | 2.81  | -2.6  |
| 7312 | CC1=CC[C@H]1O              | C05757640 | -11.28 | -0.87 | -10.45 | 1.73  | -1.69 |
| 7313 | c1cc(oc1C=O)c2ccn[nH]2     | C06666971 | -11.28 | -0.91 | -19.49 | 11.58 | -2.47 |
| 7314 | C1CC1/C(=N/O)/N            | C08146674 | -11.28 | -3.06 | -12.54 | 4.11  | 0.21  |
| 7315 | CCC/C=C\OC(=O)C            | C20230653 | -11.28 | 0.96  | -11.88 | 4.2   | -4.57 |
| 7316 | c1cc(c(cc1F)[C@H]2CO2)F    | C22215708 | -11.28 | -1.07 | -10.88 | 3.48  | -2.81 |
| 7317 | C1CC(=C(C=C1)Br)O          | C30677946 | -11.28 | 0.07  | -14.02 | 5.99  | -3.33 |
| 7318 | CNc1cc(nh+)c(n1)N          | C32914851 | -11.28 | -2.91 | -12.8  | 5.85  | -1.43 |
| 7319 | c1cnc2nc(cn2c1)CBr         | C00078830 | -11.27 | -3.11 | -13.59 | 10.7  | -5.27 |
| 7320 | c1cc2c(cc1C#N)OCO2         | C00388101 | -11.27 | -2.56 | -11.09 | 4.95  | -2.56 |
| 7321 | C1CNc2(non2)N1             | C01052690 | -11.27 | -3.66 | -16.54 | 9.25  | -0.33 |
| 7322 | CCSCCO                     | C01687820 | -11.27 | -2.88 | -10.17 | 2.27  | -0.48 |
| 7323 | CCOC(=O)CN(C)C#N           | C01690411 | -11.27 | -2.56 | -11.74 | 8.23  | -5.21 |
| 7324 | C[C@@H](COC)C(F)F          | C01709839 | -11.27 | -2.62 | -11.46 | 3.3   | -0.5  |
| 7325 | COC(=O)C(C(=O)OC)C(F)F     | C02003934 | -11.27 | -0.03 | -12.81 | 4.25  | -2.68 |
| 7326 | C[C@H](C(=O)OC)O           | C02034809 | -11.27 | -1.16 | -13.85 | 4.11  | -0.37 |
| 7327 | CC(=C)CNC(=S)NN            | C03269650 | -11.27 | 0.21  | -17.78 | 7.9   | -1.6  |
| 7328 | Cc1c[nH]nc1O               | C03861216 | -11.27 | -3.74 | -15.27 | 5.47  | 2.27  |
| 7329 | C1CSCC(=O)N1               | C04137257 | -11.27 | -2.94 | -13.2  | 5.48  | -0.61 |
| 7330 | C1COC(=O)[C@H]1N=C=S       | C04266335 | -11.27 | -0.28 | -15.9  | 6.88  | -1.97 |
| 7331 | CC#C[C@H](C)O              | C05158110 | -11.27 | -1.11 | -12.15 | 2.81  | -0.83 |
| 7332 | CSC/C(=N/O)/N              | C06794381 | -11.27 | -3.17 | -15.39 | 5.47  | 1.82  |
| 7333 | c1n([nH]c1N+)(=O)[O-]C2CC2 | C12396626 | -11.27 | 0.46  | -11.26 | 3.13  | -3.61 |
| 7334 | Cc1cccc(c1F)C#N            | C16158454 | -11.27 | -1.34 | -11.33 | 5.52  | -4.12 |
| 7335 | CCNc1ccnc(n1)Cl            | C19091606 | -11.27 | -4.52 | -9.28  | 4.68  | -2.15 |
| 7336 | CC(=O)N(C)CC=O             | C19679292 | -11.27 | -3.45 | -12.84 | 6.28  | -1.28 |
| 7337 | c1c(con1)C=O               | C20417325 | -11.27 | -2.61 | -15.28 | 7.95  | -1.33 |
| 7338 | C1COC(OC1)CCBr             | C00155380 | -11.26 | -0.74 | -10.46 | 2.61  | -2.66 |
| 7339 | C(C(=O)C(F)F)F             | C01655707 | -11.26 | -1.09 | -12.19 | 4.85  | -2.82 |
| 7340 | c1c(c(sc1Cl)Cl)Cl          | C02244224 | -11.26 | -0.69 | -11.09 | 0.41  | 0.12  |
| 7341 | Cc1c(ccc(n1)Cl)F           | C02539926 | -11.26 | -1.78 | -11.32 | 2.64  | -0.8  |
| 7342 | CC(=O)CSC(=[NH2+])N        | C04768945 | -11.26 | -0.3  | -16.88 | 4.34  | -2.58 |
| 7343 | CNc1c(c(c(c1F)F)F)F        | C05996550 | -11.26 | -0.68 | -10.01 | 1.59  | 1.16  |
| 7344 | COc1cnc(c1)Cl              | C08614795 | -11.26 | -1.53 | -12.55 | 2.68  | 0.14  |
| 7345 | c1cnn(c1)c2ccc(cc2N)F      | C12398078 | -11.26 | -1.4  | -11.04 | 4.5   | -3.32 |
| 7346 | c1c(cc(c2c1[nH]nc2)O)F     | C14983372 | -11.26 | 0.54  | -15.95 | 4.42  | -0.27 |
| 7347 | C=N/N=C/C1cncn1)N          | C15229050 | -11.26 | -1.96 | -15.72 | 6.57  | -0.15 |
| 7348 | CCOC(=O)c1ccc(n1)N         | C17061541 | -11.26 | -2.33 | -13.49 | 3.92  | 0.64  |
| 7349 | C(=N/O)C=N/O               | C18120428 | -11.26 | -6.02 | -11.96 | 3.96  | 2.76  |
| 7350 | c1c(cnc(c1Br)N)Cl          | C19721329 | -11.26 | -0.55 | -11.26 | 2.49  | -1.94 |
| 7351 | Cn1c(c(cn1)Br)C(F)F        | C26513441 | -11.26 | -0.77 | -10.42 | 2.62  | -2.69 |
| 7352 | c1cc(c(nc1)C(F)F)Cl        | C30714862 | -11.26 | -3.12 | -9.79  | 4.9   | -3.24 |
| 7353 | COc1ccccc1O                | C00389516 | -11.25 | -2.16 | -12.39 | 4     | -0.71 |
| 7354 | CCCc1[nH]ccn1              | C00389830 | -11.25 | -1.77 | -11.73 | 4.86  | -2.61 |
| 7355 | CCOC(=O)[C@H]1[C@H](O1)C   | C02016528 | -11.25 | -0.73 | -14.83 | 6.21  | -1.9  |
| 7356 | CCO[C@H]1C=CC(=O)O1        | C05316521 | -11.25 | -2.43 | -13.56 | 7.19  | -2.45 |
| 7357 | c1nc2n(n1)C(=O)CS2         | C05778321 | -11.25 | -2.68 | -16.07 | 9.63  | -2.13 |
| 7358 | c1cnc2c1cnc2               | C06119163 | -11.25 | -3.08 | -13    | 4.63  | 0.2   |
| 7359 | COC(=O)c1[n-]cnn1          | C12398239 | -11.25 | -0.78 | -15.98 | 7.72  | -2.21 |
| 7360 | c1c(cn1)CO                 | C12957939 | -11.25 | -4.44 | -13.77 | 6.98  | -0.02 |
| 7361 | c1csc(c1)[C@H](C#N)N       | C21950032 | -11.25 | -1.32 | -13.82 | 5.05  | -1.16 |
| 7362 | c1c(c(c(c1N)[O-])F)F       | C21981831 | -11.25 | -3.62 | -16.94 | 8.63  | 0.69  |
| 7363 | Cc1cc(n1)NC=O              | C23993713 | -11.25 | -2.17 | -16.27 | 8.6   | -1.4  |
| 7364 | CC[C@H](c1cccs1)O          | C32005453 | -11.25 | -1.59 | -10.78 | 3.07  | -1.95 |
| 7365 | c1c(c(cs1)Br)CO            | C00334083 | -11.24 | -1.83 | -10.65 | 2.35  | -1.11 |
| 7366 | c1cc2c(cc1C#N)no[n+]2[O-]  | C00509558 | -11.24 | -3.11 | -14.86 | 10.48 | -3.75 |
| 7367 | CC(=O)CCOC                 | C01571067 | -11.24 | -0.74 | -13.06 | 3.96  | -1.4  |
| 7368 | CC1=NCC(=O)O1              | C01578443 | -11.24 | -1.9  | -15.3  | 4.52  | 1.44  |
| 7369 | CN(CC=C)C=O                | C01695273 | -11.24 | -0.99 | -13.78 | 5.23  | -1.7  |
| 7370 | CNC(=O)C(F)F               | C01845674 | -11.24 | -2    | -13.1  | 4.01  | -0.15 |
| 7371 | c1c(nc(s1)Br)CO            | C04198769 | -11.24 | -2.25 | -12.25 | 3.13  | 0.13  |
| 7372 | c1cnc(c1)OCCO              | C05286613 | -11.24 | -3.16 | -13.82 | 5.5   | 0.23  |
| 7373 | c1cc(sc1(=O)Cl)Br          | C06335011 | -11.24 | -0.99 | -12.99 | 2.37  | 0.37  |
| 7374 | C(C(F)F)OC(=O)N            | C08390489 | -11.24 | -2.96 | -13.65 | 4.4   | 0.96  |
| 7375 | C\1COC(=O)/C1=C/[C@H]2CO2  | C16037740 | -11.24 | -1.23 | -15.08 | 6.97  | -1.9  |
| 7376 | [H]/N=C(C(CCC))OCC         | C17002002 | -11.24 | -1.43 | -11.19 | 2.22  | -0.83 |

|      |                                    |           |        |       |        |       |       |
|------|------------------------------------|-----------|--------|-------|--------|-------|-------|
| 7377 | Cc1cnn(c1)CCO                      | C19092565 | -11.24 | -2.49 | -12.63 | 4.36  | -0.47 |
| 7378 | c1cc(c(cc1F)Cl)CS                  | C19414866 | -11.24 | 0.38  | -9.57  | 2.41  | -4.47 |
| 7379 | c1csnc1C=O                         | C20443576 | -11.24 | -1.41 | -17    | 8.39  | -1.21 |
| 7380 | c1cn2c(n1)nc(cn2)C(F)(F)F          | C21994021 | -11.24 | -3.84 | -11.22 | 7.95  | -4.13 |
| 7381 | CCOC(=O)C                          | C00895412 | -11.23 | -0.42 | -12.47 | 4     | -2.34 |
| 7382 | c1cnc(n2c1nnc2)[O-]                | C01613013 | -11.23 | -3.67 | -19.81 | 10.63 | 1.61  |
| 7383 | C#C/C=N/NC(=O)N                    | C01686584 | -11.23 | -2.23 | -17.25 | 6.45  | 1.81  |
| 7384 | CC(=O)OCc1ccc(o1)[N+](=O)[O-]      | C01693515 | -11.23 | -0.92 | -14.71 | 8.16  | -3.76 |
| 7385 | C/C=C/CO                           | C01758744 | -11.23 | -1.22 | -12.25 | 2.31  | -0.05 |
| 7386 | CC[C@H]1C(=CC(=O)O1)[O-]           | C02044283 | -11.23 | -0.26 | -14.32 | 4.67  | -1.33 |
| 7387 | CC[C@H]1CCCC1=O                    | C02162286 | -11.23 | 0.82  | -11.62 | 3.01  | -3.43 |
| 7388 | C1C[C@H](OC1)CN=C=S                | C02164322 | -11.23 | -0.55 | -12.35 | 3.37  | -1.7  |
| 7389 | c1cc2cc[nH]c2c(c1)N                | C02389399 | -11.23 | -2.29 | -11.5  | 4.51  | -1.95 |
| 7390 | C/C(=C/Br)/C#N                     | C02539354 | -11.23 | -2.14 | -12.12 | 4.5   | -1.47 |
| 7391 | C(CC#N)CSC(=NH2+)N                 | C04642990 | -11.23 | -2.36 | -13.61 | 6.27  | -1.53 |
| 7392 | c1ccc2c(c1)C(=[N+]=[N-])N=N2       | C05464544 | -11.23 | 1.5   | -16.41 | 5.32  | -1.64 |
| 7393 | CCON=O                             | C05650763 | -11.23 | -0.89 | -11.1  | 2.4   | -1.64 |
| 7394 | [H]/N=C/[N-][N+](=O)[O-]SC         | C05721282 | -11.23 | -3.64 | -17.04 | 9.22  | 0.23  |
| 7395 | CNc1c(cnc(n1)NN)F                  | C06639728 | -11.23 | 0.7   | -15.05 | 4.37  | -1.26 |
| 7396 | Cc1ccc(nn1)NN                      | C11567889 | -11.23 | -4.55 | -13.34 | 7.27  | -0.6  |
| 7397 | c1ccc(cc1)Sc2nccs2                 | C15781452 | -11.23 | -0.01 | -11.3  | 4.58  | -4.51 |
| 7398 | c1cc(c(c1C#N)F)FBr                 | C16159965 | -11.23 | -2.73 | -9.9   | 5.21  | -4.12 |
| 7399 | CC/C=C/C=C/C=O                     | C20231657 | -11.23 | -0.59 | -11.98 | 4.85  | -3.51 |
| 7400 | C=C[C@@H]1C(=C)CCCCO1              | C21990744 | -11.23 | -0.72 | -8.98  | 1.71  | -3.24 |
| 7401 | c1cc(oc1)[C@H](C)[N+](=O)[O-]O     | C00055278 | -11.22 | -0.06 | -15.77 | 5.66  | -1.06 |
| 7402 | CNC(=O)c1cccc1                     | C00336927 | -11.22 | -1.67 | -14.15 | 6.67  | -2.06 |
| 7403 | c1ccc2c(c1)C[C@H]3[C@H]2O3         | C01433171 | -11.22 | -0.63 | -11.75 | 4.21  | -3.05 |
| 7404 | c1c(cnc1F)C(=O)N                   | C01596084 | -11.22 | -0.91 | -17.05 | 6.36  | 0.37  |
| 7405 | c1c(c(nc(n1)Cl)Cl)F                | C01696262 | -11.22 | 0.23  | -13.77 | 2.42  | -0.09 |
| 7406 | C1=CC(=O)N(C1=O)CO                 | C01868506 | -11.22 | -3.89 | -17.4  | 8.21  | 1.86  |
| 7407 | CC/C=C(C)/CO                       | C02039394 | -11.22 | -0.74 | -13.34 | 2.38  | 0.47  |
| 7408 | COCC(C(F)F)F                       | C02572596 | -11.22 | -0.81 | -11.3  | 2.85  | -1.96 |
| 7409 | c1c(c(nc(c1)F)F)Cl                 | C02585564 | -11.22 | 0.67  | -11.18 | 2.03  | -2.73 |
| 7410 | C#CCNC(=O)CCCl                     | C03091475 | -11.22 | 0.14  | -15.44 | 4.4   | -0.32 |
| 7411 | Cc1ccnnc1N                         | C03123182 | -11.22 | -2.87 | -13.93 | 4.29  | 1.29  |
| 7412 | c1nc(c(c(n1)[O-])F)CF              | C03130171 | -11.22 | -2.43 | -14.73 | 4.77  | 1.16  |
| 7413 | c1c(nc(s1)C=S)Br                   | C04198787 | -11.22 | -1    | -11.47 | 3.88  | -2.63 |
| 7414 | CS(=O)(=O)c1[n-jnc(n1)[N+](=O)[O-] | C04537580 | -11.22 | -7.01 | -15.22 | 12.21 | -1.2  |
| 7415 | COC(=O)Cn1ccc(=O)[nH]c1=O          | C05175369 | -11.22 | -2.99 | -19.45 | 11.37 | -0.15 |
| 7416 | Cc1cc(c(nc1)Br)N                   | C08698240 | -11.22 | -3.52 | -10.14 | 3.92  | -1.48 |
| 7417 | Cc1c(c[nH]1)C(=O)OC                | C08699843 | -11.22 | 1.42  | -16.24 | 5.23  | -1.63 |
| 7418 | c1cc2c(c1)C(=O)nsn2                | C12375028 | -11.22 | -1.97 | -15.4  | 5.88  | 0.27  |
| 7419 | COc1nc(c(nn1)F)[O-]                | C12958963 | -11.22 | -1.42 | -16.45 | 4.82  | 1.83  |
| 7420 | CNc1ccc(nc1)Cl                     | C19230648 | -11.22 | -0.67 | -11.27 | 3.02  | -2.3  |
| 7421 | Cc1nccc(n1)C=O                     | C20442771 | -11.22 | -0.8  | -13.22 | 4.49  | -1.69 |
| 7422 | Cc1c(cc(cn1)Br)N                   | C21993122 | -11.22 | -0.07 | -13.94 | 4.32  | -1.53 |
| 7423 | c1nccc2c1cc(s2)C=O                 | C30677829 | -11.22 | -3.57 | -10.25 | 5.39  | -2.79 |
| 7424 | c1ccc(cc1)NNC(=O)N                 | C00001924 | -11.21 | 0.98  | -18.31 | 6.42  | -0.29 |
| 7425 | c1ccc(c(c1)C(=O)NN)O               | C00110435 | -11.21 | -2.37 | -17.97 | 8.96  | 0.17  |
| 7426 | c1csc2n1cc(nc2)Br                  | C01571473 | -11.21 | -1.31 | -16.89 | 6.73  | 0.26  |
| 7427 | CCOC1CCCC1                         | C02034347 | -11.21 | -1.42 | -11.05 | 2.3   | -1.05 |
| 7428 | CCOP(O)O                           | C02037673 | -11.21 | -4.8  | -12.8  | 6.69  | -0.31 |
| 7429 | Cn1cnc(c1C=O)Br                    | C02382641 | -11.21 | -2.6  | -11.16 | 5.52  | -2.97 |
| 7430 | c1cc(c(nc1)F)C=O                   | C02384094 | -11.21 | -2.99 | -16.81 | 10.41 | -1.82 |
| 7431 | CC[C@H](C)N=C=O                    | C02387312 | -11.21 | 0.75  | -12.87 | 1.81  | -0.9  |
| 7432 | Cn1ccc(n1)N=C=S                    | C02522255 | -11.21 | -1.76 | -12.58 | 6.17  | -3.04 |
| 7433 | C1C[C@H](C)CC(=O)C=O               | C03875685 | -11.21 | -0.61 | -11.16 | 3.77  | -3.21 |
| 7434 | C(=N/O)c1c(c(c(c1F)F)F)F           | C04801780 | -11.21 | -0.61 | -13.16 | 4.4   | -1.84 |
| 7435 | C1CO[C@H](CO1)CCl                  | C05191059 | -11.21 | -0.15 | -15.06 | 3.19  | 0.81  |
| 7436 | C/C(=N/O)/C(=N/O)/C                | C12358611 | -11.21 | -6.64 | -13.92 | 8.74  | 0.61  |
| 7437 | CCOC(=O)C(=[N+](=O)[O-])[C](=O)C   | C12413614 | -11.21 | -1.42 | -14.12 | 6.91  | -2.58 |
| 7438 | c1ccc(c1)C=C/NC=O                  | C12495746 | -11.21 | -1.13 | -15.79 | 7.21  | -1.5  |
| 7439 | c1cc(c(c1)Cl)N=C=O                 | C12505369 | -11.21 | -2.44 | -9.88  | 3.43  | -2.32 |
| 7440 | CC(=O)Oc1ccc(nc1)C#N               | C16678104 | -11.21 | -1.08 | -13.89 | 7.13  | -3.37 |
| 7441 | C/C=C/C1OCC=CCO1                   | C16892844 | -11.21 | -0.52 | -10.77 | 3.04  | -2.96 |
| 7442 | Cn1cccc1/C=N/O                     | C17021793 | -11.21 | -3.79 | -11.65 | 5.28  | -1.05 |
| 7443 | CCOC(=O)C=C(C(F)F)F                | C17142398 | -11.21 | -0.3  | -13.42 | 6.1   | -3.59 |
| 7444 | CCCN=C/C/1C=CC=[NH+]1              | C17378193 | -11.21 | -1.05 | -10.71 | 3.1   | -2.56 |
| 7445 | CN/C(=N/C#N)/SC                    | C18043329 | -11.21 | -0.7  | -11.58 | 3.06  | -1.99 |
| 7446 | C1CCN(C(=O)C1)CCC#N                | C20296503 | -11.21 | 1.84  | -18.03 | 8.26  | -3.28 |
| 7447 | c1nnc2n1NC(=O)CS2                  | C26894428 | -11.21 | -1.72 | -16.52 | 8.67  | -1.64 |
| 7448 | COc1cnc(cn1)N                      | C33358876 | -11.21 | -1.09 | -16.88 | 5.42  | 1.34  |
| 7449 | c1cscc1CC(=O)NN                    | C00120974 | -11.2  | -4.74 | -13.46 | 7.63  | -0.62 |
| 7450 | Cc1cnc(s1)NC                       | C00330650 | -11.2  | -3.68 | -9.53  | 4.01  | -2    |
| 7451 | COCC1c[nH]c(=O)[nH]c1=O            | C00334157 | -11.2  | -4.83 | -14.87 | 7.3   | 1.2   |
| 7452 | CC(=C)C#N                          | C01571157 | -11.2  | -1.97 | -11.3  | 4.32  | -2.25 |
| 7453 | c1c(c(=O)[nH]c(=O)n1O)C#N          | C01604744 | -11.2  | 1.09  | -22.05 | 9.41  | 0.36  |
| 7454 | CC(=C)C(=O)Oc1cccc1                | C01725147 | -11.2  | -0.56 | -10.73 | 5.33  | -5.24 |
| 7455 | COc(C(F)F)F                        | C01847428 | -11.2  | -0.62 | -12.11 | 2.83  | -1.31 |
| 7456 | CC[C@H](C#CC)O                     | C02390326 | -11.2  | 0.4   | -12.68 | 2.58  | -1.5  |
| 7457 | C/C(=[NH+]/C#N)/N                  | C02575364 | -11.2  | -3.98 | -12.69 | 7.08  | -1.61 |
| 7458 | c1ccc(c1)N)NC(=O)N                 | C03163091 | -11.2  | -0.58 | -22.08 | 7.76  | 3.7   |
| 7459 | c1c(nc(n1)Br)CCO                   | C04203470 | -11.2  | -3.18 | -12.17 | 3.9   | 0.25  |
| 7460 | C(#N)c1c(n[nH]n1)Br                | C04531248 | -11.2  | -5.3  | -11.05 | 3.57  | 1.59  |
| 7461 | Cn1cnc2c(c1=O)n[nH]n2              | C04622295 | -11.2  | -6.99 | -18.29 | 11.99 | 2.1   |
| 7462 | c1cc(c(c1)O)ClO                    | C05784422 | -11.2  | -0.8  | -16.79 | 4.35  | 2.05  |
| 7463 | C1C=CC(=O)CO1                      | C06760908 | -11.2  | -1.7  | -14.97 | 5.4   | 0.06  |
| 7464 | CC(=O)Oc1cc(sc1)C=O                | C12359442 | -11.2  | -0.53 | -15.54 | 8.24  | -3.38 |
| 7465 | c1c2c(ncn1)ncnc2[O-]               | C17157982 | -11.2  | -5.28 | -15.2  | 11.08 | -1.81 |
| 7466 | CCc1ncc(cn1)C#N                    | C19093025 | -11.2  | -0.84 | -11.4  | 3.89  | -2.85 |

|      |                                |           |        |       |        |       |       |
|------|--------------------------------|-----------|--------|-------|--------|-------|-------|
| 7467 | c1ccc(cc1)O[C@@H]C(=[NH2+])N   | C19510023 | -11.2  | 1.25  | -20.4  | 9.28  | -1.33 |
| 7468 | Cc1cc(oc1N)C#N                 | C21981876 | -11.2  | 0.2   | -15.36 | 5.87  | -1.92 |
| 7469 | CCOc1ccc(nc1)Cl                | C21981935 | -11.2  | 0.07  | -12    | 3.3   | -2.58 |
| 7470 | c1cn(cn1)C[C@H]2CO2            | C22178514 | -11.2  | -3.06 | -13.34 | 7.49  | -2.29 |
| 7471 | c1ccc(cc1)Nc2[n-]c(nn2)O       | C25490371 | -11.2  | -1.7  | -18.43 | 9.2   | -0.27 |
| 7472 | c1cscc1C(=O)CC#N               | C00108546 | -11.19 | 1.12  | -20.54 | 11.6  | -3.37 |
| 7473 | c1ccc2c(c1)nn(n2)N             | C00333062 | -11.19 | -0.7  | -16.26 | 6.46  | -0.68 |
| 7474 | COc1ccc(cc1)OC#N               | C00369358 | -11.19 | -1.01 | -12.6  | 2.79  | -0.38 |
| 7475 | Cn1ccnc1I                      | C00967464 | -11.19 | -1.68 | -10.87 | 4.54  | -3.18 |
| 7476 | C=C([C@H](CO)O)Cl              | C01661160 | -11.19 | -2.65 | -13.75 | 3.35  | 1.86  |
| 7477 | C=COC(=O)N                     | C01720047 | -11.19 | -3.1  | -13.94 | 4.6   | 1.25  |
| 7478 | c1(c(ss1)C(F)(F)C(F)(F)F)      | C01765084 | -11.19 | -1.23 | -7.35  | 0.62  | -3.23 |
| 7479 | CC[C@H](C)[N+](=O)[O-]         | C02034490 | -11.19 | -0.86 | -11.17 | 3.8   | -2.96 |
| 7480 | CCCC(=O)CC                     | C02034635 | -11.19 | -0.4  | -10.96 | 3.45  | -3.27 |
| 7481 | CC(=O)Cn1cc(cn1)Cl             | C02537946 | -11.19 | -2.97 | -14.21 | 8.9   | -2.91 |
| 7482 | c1cnc(cn1)NC(=S)N              | C02538964 | -11.19 | -2.14 | -19.01 | 11.45 | -1.49 |
| 7483 | C(=O)C(F)BrN                   | C04566219 | -11.19 | -3.01 | -12.03 | 3.29  | 0.56  |
| 7484 | [H]/N=c1/n(c(cs1)C)N           | C04619757 | -11.19 | -2.92 | -15.3  | 4.67  | 2.36  |
| 7485 | c1cnn(n1)C(=O)O                | C05605229 | -11.19 | -5.89 | -17.09 | 11.25 | 0.54  |
| 7486 | CCSC#N                         | C05648398 | -11.19 | 0.73  | -12.8  | 2.84  | -1.96 |
| 7487 | [H]/N=C/C(C)C)OC               | C05715333 | -11.19 | -1.04 | -12.27 | 2.2   | -0.08 |
| 7488 | c1c(c(=O)[nH]cn1)C(=O)N        | C08672865 | -11.19 | -3.89 | -18.1  | 8.35  | 2.45  |
| 7489 | c1ccc2c(c1)ncn2N[N+](=O)[O-]   | C13230357 | -11.19 | -1.66 | -10.89 | 5.31  | -3.95 |
| 7490 | CS/C(=NH+)]N)/N                | C16248586 | -11.19 | -2.92 | -12.71 | 3.89  | 0.55  |
| 7491 | C(=N/C(=O)N)NC(=O)N            | C17145934 | -11.19 | -3.23 | -17.99 | 6.25  | 3.78  |
| 7492 | c1[nH]c2c(n1)ncnc2N(N=O)O      | C17174526 | -11.19 | -2.55 | -17.23 | 11.1  | -2.51 |
| 7493 | c1nc(c2c(n1)nsn2)N             | C17298966 | -11.19 | -2.22 | -16.45 | 7.66  | -0.19 |
| 7494 | C(C(F)(F)F)NN                  | C19166968 | -11.19 | -2.96 | -10.57 | 2.02  | 0.32  |
| 7495 | c1ccc(c(c1)NC(=O)CC#N)F        | C00091998 | -11.18 | -4.24 | -15.23 | 11.48 | -3.19 |
| 7496 | CC(=O)Nc1cc(c(c1F)F)F          | C00398900 | -11.18 | -1.92 | -12.04 | 5.14  | -2.36 |
| 7497 | CC1=[NH+]]C(=O)CN1             | C01600181 | -11.18 | -2.67 | -15.56 | 6.27  | 0.78  |
| 7498 | CSc1cc(ncn1)N                  | C01675805 | -11.18 | 0.01  | -16.5  | 3.68  | 1.63  |
| 7499 | CCCCOC(=O)C                    | C01699905 | -11.18 | 1.48  | -12.89 | 3.82  | -3.59 |
| 7500 | CC1=CC(=O)N(C1=O)N             | C01731977 | -11.18 | -3.46 | -15.99 | 6.07  | 2.19  |
| 7501 | C=CCCCOCCI                     | C02244264 | -11.18 | -1.83 | -10.56 | 2.05  | -0.84 |
| 7502 | C1C=C(CS1(=O)=O)N=C=S          | C02454917 | -11.18 | 0.22  | -18.84 | 8.05  | -0.61 |
| 7503 | COc1c(cc(c1O)O)O               | C02566737 | -11.18 | -1.85 | -18.1  | 6.3   | 2.47  |
| 7504 | C1CCO[C@H](C1)O                | C03606317 | -11.18 | -1.04 | -12.6  | 2.73  | -0.26 |
| 7505 | C(=O)(C(=O)NO)NO               | C04775726 | -11.18 | -8.08 | -15.01 | 8.89  | 3.02  |
| 7506 | CNC(=O)NCC(F)(F)F              | C04804438 | -11.18 | -3.04 | -13.97 | 5.18  | 0.66  |
| 7507 | C[C@H](CCS)CS                  | C05420301 | -11.18 | -0.44 | -8.72  | 1.26  | -3.29 |
| 7508 | Cc1cc(c(nc1)Cl)F               | C08698182 | -11.18 | 0.92  | -14.91 | 3.77  | -0.95 |
| 7509 | CCCCN/C(=N/O)N                 | C13536006 | -11.18 | -0.98 | -13.31 | 4.15  | -1.04 |
| 7510 | c1cc(oc1)CNCC#N                | C20056646 | -11.18 | -1.44 | -15.71 | 7.33  | -1.36 |
| 7511 | C1=C(C(=NC(=O)[C@@H]1Cl)Br     | C22000015 | -11.18 | -1.76 | -14.4  | 6.31  | -1.33 |
| 7512 | Cc1nc(co1)Cl(=O)N              | C22606247 | -11.18 | -2.56 | -17.75 | 6.82  | 2.3   |
| 7513 | c1cn(cn1)C(=O)NCC(=O)N         | C32628556 | -11.18 | -5.18 | -16.75 | 10.05 | 0.7   |
| 7514 | c1cc(ccc1CO)OC(F)F             | C00160555 | -11.17 | -3.73 | -12.13 | 5.66  | -0.97 |
| 7515 | c1(c(non1)C(=O)N)C(=O)N        | C01083685 | -11.17 | -3.65 | -17.47 | 7.4   | 2.55  |
| 7516 | c1cnn2c(n1)nnn2                | C01504564 | -11.17 | -4.46 | -19.78 | 14.61 | -1.54 |
| 7517 | C1CSCC(=O)O1                   | C01604633 | -11.17 | -1.01 | -12.73 | 4.94  | -2.38 |
| 7518 | C[C@H]1CCCS1                   | C02039245 | -11.17 | 0.47  | -10.13 | 1.89  | -3.4  |
| 7519 | C[C@H](C(=O)C)F                | C02386513 | -11.17 | -0.8  | -11.26 | 2.97  | -2.09 |
| 7520 | CCn1ccc(n1)N=C=S               | C02537537 | -11.17 | 0.39  | -14.06 | 6.16  | -3.66 |
| 7521 | CCOc1ccc(c(c1)F)Cl             | C02567847 | -11.17 | 0.19  | -12.92 | 2.9   | -1.33 |
| 7522 | c1c(sc(n1)Cl)CCI               | C02572329 | -11.17 | -1.36 | -13.47 | 3.18  | 0.48  |
| 7523 | CCn1cc(cn1)CO                  | C02578416 | -11.17 | -2.39 | -14.14 | 5.87  | -0.5  |
| 7524 | C[C@H](CCl)/C(=[NH+])N)/N      | C04203877 | -11.17 | -1.55 | -11.89 | 2.87  | -0.59 |
| 7525 | c1cc(c(c(c1)F)C(=O)C=O)F       | C05240975 | -11.17 | -3.22 | -12.58 | 8.64  | -4    |
| 7526 | c1c2c(c(nn1)NN)n[n-]n2         | C05543320 | -11.17 | -1.73 | -17.86 | 6.7   | 1.72  |
| 7527 | c1[nH]c(c(n1)Br)Br             | C08294931 | -11.17 | -3.77 | -10    | 4.98  | -2.39 |
| 7528 | CS(=O)(=O)n1cccn1              | C13948093 | -11.17 | -2.31 | -18.83 | 9.73  | 0.24  |
| 7529 | c1cscc1CNCC(F)(F)F             | C19435440 | -11.17 | -1.08 | -10.62 | 3.1   | -2.58 |
| 7530 | CC/C=C/C=C)CO                  | C20231651 | -11.17 | -0.44 | -12.08 | 3.15  | -1.8  |
| 7531 | CCc1nc(noc1)CCI                | C20368531 | -11.17 | 2.99  | -15.65 | 3.86  | -2.36 |
| 7532 | c1cc(oc1)C(=O)c2[nH]cc[nH+]2   | C00167322 | -11.16 | -0.91 | -15.57 | 7.79  | -2.46 |
| 7533 | c1cc(ccc1NC=O)Br               | C00396370 | -11.16 | -1.68 | -14.12 | 7.02  | -2.39 |
| 7534 | C1C(=C(C(=O)O1)Cl)Cl           | C01669133 | -11.16 | -0.99 | -13.05 | 5.54  | -2.67 |
| 7535 | C=CCON                         | C01716621 | -11.16 | -1.49 | -11.63 | 2.08  | -0.14 |
| 7536 | c1(c(=O)ssc1Cl)Cl              | C01722340 | -11.16 | 1.63  | -14.82 | 1.99  | 0.04  |
| 7537 | COC(=O)CC(=O)Cl                | C02170332 | -11.16 | -2.04 | -13.6  | 7.16  | -2.67 |
| 7538 | c1c(cn(n1)CC(F)(F)F)N          | C02521254 | -11.16 | -1.4  | -14.62 | 5.85  | -1    |
| 7539 | c1cc(nc(c1)F)C(=O)Cl           | C02525419 | -11.16 | -2.73 | -11.03 | 5.03  | -2.44 |
| 7540 | C(CBr)CC(=O)Cl                 | C02560396 | -11.16 | -0.69 | -13.37 | 3.28  | -0.38 |
| 7541 | c1ccc(cc1)COCC#N               | C03130524 | -11.16 | 0.55  | -17.09 | 6.99  | -1.61 |
| 7542 | Cn1cccc1C(=O)N                 | C03262883 | -11.16 | -0.34 | -16.31 | 6.09  | -0.59 |
| 7543 | c1ccc(cc1)N=S=O                | C04521868 | -11.16 | -1.34 | -20.22 | 11.59 | -1.2  |
| 7544 | CN(CCO)N=O                     | C05066705 | -11.16 | -4.04 | -13.5  | 4.66  | 1.72  |
| 7545 | C/C=C/C=C)COC(=O)C             | C05282693 | -11.16 | -0.6  | -12.48 | 4.2   | -2.28 |
| 7546 | CC/C=C)CCC=O                   | C06661796 | -11.16 | -0.58 | -12.85 | 3.96  | -1.7  |
| 7547 | [C@H](C(=O)N)(F)I              | C08698285 | -11.16 | -3.17 | -12.55 | 4.29  | 0.26  |
| 7548 | Cc1ccnc(c1)NN                  | C11567887 | -11.16 | -1.92 | -11.88 | 4.15  | -1.51 |
| 7549 | c1cnn2c1ncc(c2)N               | C12396940 | -11.16 | -3.3  | -14.37 | 7.51  | -1    |
| 7550 | COc1cc(coc1)C=O                | C16943643 | -11.16 | -2.76 | -12.36 | 5.11  | -1.15 |
| 7551 | C1[C@@H](C=C)C[C@H]2[C@H]1O2)O | C17000696 | -11.16 | -2.19 | -13.55 | 3.88  | 0.69  |
| 7552 | CCn1c(nnn1)N                   | C17024933 | -11.16 | -1.21 | -15.95 | 7.56  | -1.56 |
| 7553 | C1CC(=NC1)C[N+](=O)[O-]        | C20445714 | -11.16 | 2.5   | -15.8  | 3.18  | -1.05 |
| 7554 | c1cnc(cc1Br)C#N                | C00065167 | -11.15 | 0.54  | -13.3  | 4.35  | -2.75 |
| 7555 | C1C=C[C@H]2[C@H]1C(=O)C2(Cl)Cl | C00159161 | -11.15 | 0.83  | -11.09 | 2.99  | -3.88 |
| 7556 | CCC(=NO)CC                     | C00160693 | -11.15 | -1.42 | -11.82 | 3.27  | -1.18 |

|      |                                               |           |        |       |        |       |       |
|------|-----------------------------------------------|-----------|--------|-------|--------|-------|-------|
| 7557 | c1nc2c(c(n1)N)CCC2                            | C00248748 | -11.15 | -0.24 | -13.22 | 4.7   | -2.39 |
| 7558 | Cc1c([nH]c(nc1=O)N)N                          | C00330433 | -11.15 | -4.24 | -15.8  | 9.12  | -0.23 |
| 7559 | c1ccnc(c1)Nc2ncccn2                           | C01267756 | -11.15 | 2.09  | -14.92 | 7.13  | -5.45 |
| 7560 | CCN1C(=O)CSC1=O                               | C01319370 | -11.15 | 1.22  | -15.25 | 4.67  | -1.79 |
| 7561 | CCCC(=O)C#C                                   | C01613266 | -11.15 | -0.32 | -12.41 | 4.66  | -3.08 |
| 7562 | C[C@H](C(=O)C(=C)C)O                          | C01663924 | -11.15 | -0.58 | -11.28 | 2.24  | -1.52 |
| 7563 | c1c(sc(n1)[S-])N                              | C01699988 | -11.15 | -4.52 | -15.72 | 9.56  | -0.47 |
| 7564 | C[C@@H](CCC=C)O                               | C02003061 | -11.15 | -0.48 | -12.48 | 1.49  | 0.33  |
| 7565 | c1c(cnc(c1C=O)Cl)F                            | C02384081 | -11.15 | -0.51 | -14.76 | 6.38  | -2.26 |
| 7566 | C1C=CC(=O)S1                                  | C02545307 | -11.15 | -1.96 | -14.07 | 6.93  | -2.04 |
| 7567 | c1(nc(sn1)[S-])S                              | C04170603 | -11.15 | -2.21 | -13.78 | 6.99  | -2.15 |
| 7568 | C=CCOc1ccc(cc1)N                              | C05000140 | -11.15 | -2.19 | -9.63  | 3.05  | -2.39 |
| 7569 | C[C@@H](c1cccn1)O                             | C05319867 | -11.15 | -1.76 | -11.97 | 3.4   | -0.83 |
| 7570 | c1cnc([nH]1)CC#N                              | C12520175 | -11.15 | -2.1  | -17.45 | 10.3  | -1.9  |
| 7571 | C/C(=N/O)/C(F)F                               | C16082659 | -11.15 | -2.66 | -12.19 | 3.97  | -0.27 |
| 7572 | c1nnc(n1)CCC(=S)N                             | C19476287 | -11.15 | -2.92 | -15.39 | 9.78  | -2.62 |
| 7573 | C[C@H]1C=NN([C@@H]1C)C                        | C22205956 | -11.15 | -1.02 | -11.24 | 3.33  | -2.21 |
| 7574 | CCc1ccc(c(c1)O)O                              | C00002501 | -11.14 | -1.4  | -13.49 | 4.46  | -0.72 |
| 7575 | COc1ncccn1                                    | C00330839 | -11.14 | -1.67 | -15.73 | 5.85  | 0.4   |
| 7576 | c1cc(cc1C(=O)NN)[N+](=O)[O-]                  | C01041279 | -11.14 | -5.1  | -12.57 | 6.39  | 0.13  |
| 7577 | C(CO)NC(=O)C(F)F                              | C01602826 | -11.14 | -3.21 | -14.64 | 4.96  | 1.75  |
| 7578 | CC=C/C=O                                      | C02031161 | -11.14 | -1.07 | -12.12 | 4.57  | -2.52 |
| 7579 | CCOC(=O)c1c(snn1)N                            | C02196992 | -11.14 | -2.43 | -13.51 | 5.29  | -0.49 |
| 7580 | Cc1c(c(c(c1F)OC)F)F                           | C02526254 | -11.14 | 0.99  | -10.73 | 2.18  | -3.58 |
| 7581 | C(CCB)CO                                      | C02560614 | -11.14 | -1.39 | -11.41 | 2.36  | -0.7  |
| 7582 | C[C@@H](C(F)F)OC(=O)C                         | C02579126 | -11.14 | 0.04  | -11.6  | 3.54  | -3.11 |
| 7583 | CCN(CC)N=O                                    | C03875370 | -11.14 | -1.17 | -12.25 | 3.77  | -1.48 |
| 7584 | CC(=O)OCCCS                                   | C04763523 | -11.14 | -0.79 | -13.66 | 4.25  | -0.94 |
| 7585 | C/C=N/N(C)C                                   | C05187253 | -11.14 | -0.45 | -12.79 | 2.96  | -0.85 |
| 7586 | C[C@H](C#CC(F)F)O                             | C05531338 | -11.14 | -2.64 | -10.16 | 2.64  | -0.99 |
| 7587 | C1CC=C([C@H](C1)O)[N+](=O)[O-]                | C05566682 | -11.14 | -2.94 | -11.13 | 5.23  | -2.29 |
| 7588 | c1nc2n(n1)[C@H]1[C@@H](C=NN2)[N+](=O)[O-][O-] | C05670174 | -11.14 | -1.75 | -18.01 | 5.76  | 2.86  |
| 7589 | CC(=C1C(=NC(=S)S1)[O-])C                      | C08971986 | -11.14 | -2.39 | -12.04 | 5.81  | -2.52 |
| 7590 | Cc1ccnc1NC(=NH2+)[S-]                         | C13571573 | -11.14 | -0.32 | -12.07 | 4.36  | -3.11 |
| 7591 | C[C@@H]([C@H]1[C@H](O1)[C@@H](C)O)O           | C17020278 | -11.14 | -1.67 | -13.87 | 3.19  | 1.21  |
| 7592 | c1cc(ccc1C=O)OC(=O)C(F)F                      | C31976025 | -11.14 | -1.52 | -11.01 | 5.84  | -4.45 |
| 7593 | C[C@H](Cc1ccc(cc1)F)O                         | C32005747 | -11.14 | -2.85 | -8.88  | 3.13  | -2.54 |
| 7594 | CCc1nc(cs1)C                                  | C00396075 | -11.13 | -1.27 | -10.25 | 3.28  | -2.9  |
| 7595 | CNC(=O)c1cccc1O                               | C00406312 | -11.13 | -1.93 | -16.24 | 8.07  | -1.02 |
| 7596 | CCO[C@@H]1CCCO1                               | C00407008 | -11.13 | 0.23  | -14.07 | 2.56  | 0.14  |
| 7597 | CC(=C)C=O                                     | C01586526 | -11.13 | -1.38 | -12.6  | 4.64  | -1.8  |
| 7598 | C(COC(=O)CBr)C#N                              | C01672183 | -11.13 | -1.09 | -16.58 | 8.43  | -1.89 |
| 7599 | C(CCC)CO                                      | C01712476 | -11.13 | -1.34 | -11.64 | 2.47  | -0.63 |
| 7600 | C=C(CCC#N)C#N                                 | C01995300 | -11.13 | -3.06 | -13.77 | 9.11  | -3.41 |
| 7601 | CCc1nc(sn1)N                                  | C02506771 | -11.13 | -0.68 | -14.15 | 4.73  | -1.04 |
| 7602 | COc1ccc(cc1O)F                                | C02516795 | -11.13 | -2.4  | -11.46 | 4.02  | -1.29 |
| 7603 | c1ccc(c(c1)N)CC#N                             | C03263977 | -11.13 | -1.78 | -11.7  | 6.08  | -3.74 |
| 7604 | COC(=O)c1c(c[nH]n1)[N+](=O)[O-]               | C04343026 | -11.13 | -1.73 | -14.71 | 7.36  | -2.06 |
| 7605 | CNC(=S)Nc1cccn1                               | C05569913 | -11.13 | 0.34  | -18.65 | 9.37  | -2.2  |
| 7606 | c1(c(snn1)[O-])C(=O)N                         | C06057080 | -11.13 | -4.52 | -19.71 | 9.52  | 3.58  |
| 7607 | c1cnc([n+](c1N)[O-])N                         | C21984663 | -11.13 | -5.36 | -16.65 | 11.89 | -1.01 |
| 7608 | c1c(csc1C=O)Br                                | C00120279 | -11.12 | -1.14 | -14.9  | 4.9   | 0.02  |
| 7609 | c1cc(c(cc1N)Cl)Cl                             | C00157572 | -11.12 | -2.14 | -9.32  | 2.74  | -2.39 |
| 7610 | c1nnc2n1nc(s2)[S-]                            | C01596618 | -11.12 | -0.55 | -18.58 | 6.28  | 1.73  |
| 7611 | C[C@H]1[C@@H]1[C@H]1C(=O)Cl                   | C01766064 | -11.12 | -0.93 | -11.65 | 2.35  | -0.89 |
| 7612 | Cc1cc(ccc1F)C#N                               | C02510727 | -11.12 | -1.38 | -10.4  | 3.39  | -2.72 |
| 7613 | C1[C@H](C=CC1=O)O                             | C04202495 | -11.12 | -3.25 | -14.18 | 6.13  | 0.17  |
| 7614 | C1C(=O)O[C@H](S1)C(F)F                        | C04204971 | -11.12 | -1.4  | -11.08 | 4.15  | -2.79 |
| 7615 | c1cc(c(cc1C(F)F)O)F                           | C04265115 | -11.12 | -3.16 | -9.47  | 3.13  | -1.63 |
| 7616 | C1CCONC1                                      | C04992731 | -11.12 | -1.02 | -11.6  | 2.07  | -0.56 |
| 7617 | C(=C(C=O))C=O                                 | C05178379 | -11.12 | -3.08 | -13.01 | 6.35  | -1.38 |
| 7618 | c1ccc(cc1)Nc2ncccn2                           | C06665762 | -11.12 | 2.56  | -14.91 | 4.31  | -3.09 |
| 7619 | c1cnc2ncc(n2c1)N                              | C12357305 | -11.12 | -4.07 | -14.41 | 10.55 | -3.2  |
| 7620 | c1ccc(cc1)/C=C/C#N                            | C13532158 | -11.12 | -2.31 | -10.77 | 6.4   | -4.45 |
| 7621 | c1cc2c(cc1F)[nH]nc2Br                         | C14983474 | -11.12 | -0.36 | -10.93 | 3     | -2.83 |
| 7622 | C=CCC[C@H](CO)O                               | C16123974 | -11.12 | -4.62 | -11.36 | 3.75  | 1.1   |
| 7623 | c1cc(c(c1Cl)[N+](=O)[O-])F                    | C16158176 | -11.12 | -3.51 | -10.78 | 7.51  | -4.35 |
| 7624 | C1=C/C(=C/NNC(=O)N)/[NH+]=C1                  | C17380264 | -11.12 | 0.34  | -18.75 | 6.93  | 0.36  |
| 7625 | c1cc(=O)[nH]cc1CO                             | C21297324 | -11.12 | -3.74 | -17.56 | 9.24  | 0.93  |
| 7626 | Cn1c(nc(n1)[N+](=O)[O-])N=[N+]=[N-]           | C32602714 | -11.12 | 1.09  | -15.29 | 6.67  | -3.59 |
| 7627 | CC(=O)Nc1cccc1N                               | C00039703 | -11.11 | -1.59 | -15.43 | 7.2   | -1.29 |
| 7628 | C1CS[C@H](CS1)C#N                             | C00159877 | -11.11 | 1.86  | -13.42 | 3.89  | -3.44 |
| 7629 | CCC[C@@H](C#C)O                               | C01765495 | -11.11 | 0.37  | -12.24 | 2.18  | -1.41 |
| 7630 | c1c([nH]c(=O)[nH]c1=O)CCl                     | C02008825 | -11.11 | -2.96 | -16.63 | 8.34  | 0.15  |
| 7631 | c1cc(ccc1NC(=O)NN)Cl                          | C02528216 | -11.11 | -1.94 | -14.83 | 6.55  | -0.9  |
| 7632 | C1CCSCC1                                      | C04416382 | -11.11 | 0.78  | -9.74  | 1.22  | -3.36 |
| 7633 | Cc1c(cccn1)C#N                                | C07277618 | -11.11 | -0.81 | -11.94 | 4.34  | -2.7  |
| 7634 | C=CCn1cc(cn1)CO                               | C27832618 | -11.11 | -2.36 | -14.44 | 6.59  | -0.9  |
| 7635 | c1c(cc(c1F)C(F)F)F                            | C00116711 | -11.1  | -2.42 | -11.52 | 4.67  | -1.83 |
| 7636 | COC(=O)c1cc(no1)[O-]                          | C00389603 | -11.1  | -0.39 | -16.02 | 5.96  | -0.66 |
| 7637 | CC(C)C(=O)C                                   | C01699949 | -11.1  | -0.89 | -11.04 | 3.35  | -2.53 |
| 7638 | C1C(=O)OCC(=O)N1                              | C02028750 | -11.1  | -2.3  | -15.92 | 6.74  | 0.38  |
| 7639 | CC(=O)Oc1cccc(c1)C=O                          | C02146872 | -11.1  | -2.24 | -15.49 | 10.71 | -4.09 |
| 7640 | CC(=O)C=C/c1ccc[nH]1                          | C02518984 | -11.1  | 0.84  | -15.45 | 6.8   | -3.29 |
| 7641 | Cc1cnc(nc1N)Cl                                | C02583509 | -11.1  | -4.73 | -12.91 | 5.02  | 1.52  |
| 7642 | c1cnc1CCCO                                    | C08294976 | -11.1  | -2.22 | -12.85 | 4.85  | -0.88 |
| 7643 | c1cnc(c(c1C)[N+](=O)[O-])N                    | C22048227 | -11.1  | -2.88 | -11.71 | 5.59  | -2.1  |
| 7644 | c1cc2c(c3c1non3)non2                          | C00328553 | -11.09 | -0.02 | -14.2  | 4.81  | -1.68 |
| 7645 | c1ccc2c(c1)[nH]c(=O)s2                        | C00395576 | -11.09 | -3.67 | -13.33 | 5.94  | -0.03 |
| 7646 | c1ccc(c(c1)CC#N)Cl                            | C00406929 | -11.09 | -1.01 | -13.52 | 5.44  | -2    |

|      |                                  |           |        |       |        |       |       |
|------|----------------------------------|-----------|--------|-------|--------|-------|-------|
| 7647 | c1cnc(n(c1=O)[N+](=O)[O-])[O-]   | C01309107 | -11.09 | -6.08 | -19.01 | 14.44 | -0.44 |
| 7648 | CNC(=O)c1c(n(n1)C)N              | C01417947 | -11.09 | -5.72 | -14.21 | 7     | 1.84  |
| 7649 | CCCCOC(=O)C=C                    | C01532055 | -11.09 | 1.68  | -12.66 | 3.88  | -3.99 |
| 7650 | CO[C@H](CBr)C=C                  | C01667154 | -11.09 | -0.03 | -12.12 | 1.51  | -0.46 |
| 7651 | c1cc(c2nnnn2c1)N                 | C01683864 | -11.09 | -2.98 | -17.81 | 9.79  | -0.09 |
| 7652 | Cc1ccnn1CC#N                     | C02537502 | -11.09 | -1.01 | -15.09 | 7.66  | -2.65 |
| 7653 | Cc1c2ccc(cc2[nH]n1)F             | C03913595 | -11.09 | -0.48 | -11.84 | 4.13  | -2.91 |
| 7654 | CC(C)CC(=O)/C(=N/N)/N            | C04203888 | -11.09 | 2.11  | -15.53 | 3.02  | -0.68 |
| 7655 | Cn1c(=O)[nH][nH]c1=O             | C06072207 | -11.09 | -5.31 | -15.87 | 9     | 1.09  |
| 7656 | C1C[C@H](OC1)C(=O)Cl             | C11731531 | -11.09 | -1.37 | -11.51 | 4.25  | -1.49 |
| 7657 | c1cc(cc(c1)Cl)CS                 | C19421408 | -11.09 | -1.11 | -7.83  | 2.29  | -4.44 |
| 7658 | CCCNc1cccc[nH]1                  | C20015472 | -11.09 | -1    | -9.89  | 3.03  | -3.23 |
| 7659 | COc1c(cn(n1)CC(F)F)N             | C20348918 | -11.09 | -4.33 | -13.51 | 6.14  | 0.61  |
| 7660 | C1=C(C=NC(=O)[C@H]1Cl)Br         | C22000018 | -11.09 | -1.65 | -14.44 | 6.35  | -1.34 |
| 7661 | c1cn(c(=O)[nH]c1=O)CC#N          | C26515441 | -11.09 | -3.15 | -21.53 | 14.42 | -0.84 |
| 7662 | c1cc(oc1)CNC(=O)CCl              | C00122762 | -11.08 | -0.54 | -15.39 | 6.79  | -1.94 |
| 7663 | c1cc(oc1)C(=O)/C(=N/O)/C#N       | C00138927 | -11.08 | -0.44 | -17.4  | 7.22  | -0.46 |
| 7664 | c1cc(ncc1C(F)F)Br                | C00166552 | -11.08 | -1.98 | -10.43 | 2.56  | -1.24 |
| 7665 | Cc1c(cno1)C(=O)C                 | C00169509 | -11.08 | -1.66 | -11.7  | 4.82  | -2.53 |
| 7666 | Cc1ccc(nc1)[N+](=O)[O-]          | C00330898 | -11.08 | -2.79 | -12.42 | 8.04  | -3.92 |
| 7667 | CCOC(=O)C(=O)N(C)C               | C01603528 | -11.08 | -0.06 | -13.39 | 4.41  | -2.03 |
| 7668 | C#C/C=C/CO                       | C01667503 | -11.08 | -1.97 | -12.34 | 3.81  | -0.57 |
| 7669 | C(CO)Cl                          | C01845916 | -11.08 | -3.17 | -9.96  | 2.56  | -0.5  |
| 7670 | c1c(cc(c1O)F)FBr                 | C02574963 | -11.08 | -1.21 | -12.93 | 3     | 0.05  |
| 7671 | CC/C=C/C[C@H](C)O                | C04283838 | -11.08 | -1.65 | -9.41  | 1.71  | -1.73 |
| 7672 | CO[P@H](=O)CCl                   | C04974704 | -11.08 | -0.75 | -14.24 | 5.39  | -1.47 |
| 7673 | C1[C@H](C@H)C=C1)O               | C05426112 | -11.08 | -1.61 | -12.61 | 1.96  | 1.17  |
| 7674 | c1cnc(nc1)NNC=O                  | C06599348 | -11.08 | -4.42 | -16.79 | 7.83  | 2.3   |
| 7675 | Cc1cncnc1                        | C14983067 | -11.08 | -0.52 | -9.52  | 2.19  | -3.24 |
| 7676 | c1c2c(nc[nH]2)nc(n1)C(F)F        | C26506868 | -11.08 | 0.11  | -15.77 | 7.57  | -2.99 |
| 7677 | c1cn(cn1)C(=O)N2ccnc2            | C00155422 | -11.07 | -1.26 | -11.63 | 6.2   | -4.38 |
| 7678 | Cc1ccc(o1)/C=N/O                 | C00169291 | -11.07 | -0.66 | -16.3  | 7.48  | -1.59 |
| 7679 | Cn1ccc(=O)[nH]c1=O               | C00409298 | -11.07 | -3.11 | -17.41 | 9.75  | -0.3  |
| 7680 | c1nc(c2c(n1)[nH]c(n2)Br)N        | C00967449 | -11.07 | -3.44 | -10.98 | 4.79  | -1.43 |
| 7681 | CN1C(=O)CSC1=O                   | C01101310 | -11.07 | 0.49  | -15.54 | 4.87  | -0.88 |
| 7682 | CC(=C)CO                         | C01661231 | -11.07 | -2.08 | -10.99 | 2.26  | -0.26 |
| 7683 | CCOC/C(=C/Cl)/C                  | C01683072 | -11.07 | -0.53 | -11    | 1.56  | -1.1  |
| 7684 | c1cc(c(c1N)F)Cl)F                | C01706154 | -11.07 | 0.5   | -15.22 | 3.97  | -0.32 |
| 7685 | C1ccc(c(n1)F)O                   | C02384075 | -11.07 | -2.5  | -15.11 | 5.93  | 0.6   |
| 7686 | c1ccc2c(c1)c(no2)CBr             | C02509747 | -11.07 | 1.45  | -14.45 | 5.95  | -4.02 |
| 7687 | Cc1c2c([nH]n1)CCCC2              | C04317853 | -11.07 | -2.86 | -9.75  | 4.49  | -2.95 |
| 7688 | c1c[nH]c2c1CCCC2                 | C04521854 | -11.07 | -1.9  | -11.87 | 2.69  | 0.01  |
| 7689 | C[C@@H]1(CCC=C1)O                | C05049663 | -11.07 | -0.68 | -11.17 | 1.84  | -1.07 |
| 7690 | C[C@H]1CCCCO1                    | C05226869 | -11.07 | 0.03  | -10.78 | 1.52  | -1.84 |
| 7691 | c1csc(c1O)C(=O)N                 | C11848541 | -11.07 | -3.99 | -16.47 | 8.07  | 1.32  |
| 7692 | c1c([nH]c2c1c(=O)[nH]cc2         | C14985678 | -11.07 | -1.84 | -17.23 | 7.03  | 0.97  |
| 7693 | C/C(=C/C(=O)OC)/OC               | C17328156 | -11.07 | -1.86 | -10.86 | 3.66  | -2.01 |
| 7694 | C=CCOc1c(non1)N                  | C26442172 | -11.07 | -0.61 | -17.56 | 6.56  | 0.54  |
| 7695 | C(C(=O)NN)NC(=O)C(F)F            | C32501070 | -11.07 | -6.14 | -15.53 | 8.48  | 2.13  |
| 7696 | c1ccc2c(c1N)Nnon2                | C00160421 | -11.06 | -3.86 | -12.89 | 5.28  | 0.41  |
| 7697 | Cc1ccc(s1)Br                     | C00403354 | -11.06 | -0.24 | -12.56 | 1.6   | 0.13  |
| 7698 | C[C@H]1CC[C@H](C1=O)C            | C01575590 | -11.06 | 1.17  | -11.95 | 3.11  | -3.39 |
| 7699 | C1C[C@H](C=C1)C(=O)N             | C01732795 | -11.06 | -3.5  | -12.17 | 5.18  | -0.57 |
| 7700 | C/C=C/C)C#N                      | C02035672 | -11.06 | -1.26 | -11.13 | 4.12  | -2.8  |
| 7701 | c1ccc2c(c1)F)C(=O)C2             | C03847841 | -11.06 | -1.1  | -13.24 | 6.97  | -3.69 |
| 7702 | c1c(c([nH]n1)C#N)Br              | C04216077 | -11.06 | 1.11  | -14.19 | 3.28  | -1.27 |
| 7703 | CCCS                             | C04706588 | -11.06 | -0.52 | -10.89 | 0.72  | -0.38 |
| 7704 | C/C=C/CSC                        | C05132858 | -11.06 | -0.79 | -10.7  | 1.47  | -1.04 |
| 7705 | C1COCC(=C1)C=O                   | C05190728 | -11.06 | -1.11 | -15.62 | 5.82  | -0.16 |
| 7706 | CC(=O)N[N-]C(=N[N+](=O)[O-])[O-] | C06073646 | -11.06 | -3.05 | -18.37 | 8.77  | 1.59  |
| 7707 | CC(=O)c1c(cccn1)F                | C08698164 | -11.06 | -2.09 | -14.41 | 6.71  | -1.28 |
| 7708 | C/C=C/C=C)CO                     | C13546465 | -11.06 | -2.07 | -10.37 | 2.42  | -1.04 |
| 7709 | CCC(=O)OCCCl                     | C16609984 | -11.06 | -0.7  | -11.19 | 4.31  | -3.48 |
| 7710 | CCc1c(=O)[nH]c(=O)[nH]n1         | C16887345 | -11.06 | 0.61  | -18.12 | 5.53  | 0.92  |
| 7711 | C/[NH+]=C/c1ccc(cc1)[N+](=O)[O-] | C16978838 | -11.06 | -1.51 | -12.27 | 5.34  | -2.62 |
| 7712 | C[C@H](CS)S                      | C17327670 | -11.06 | 0.22  | -10.56 | 1.63  | -2.35 |
| 7713 | COCC(=O)CNCC#C                   | C20033525 | -11.06 | -1.45 | -14.11 | 5.78  | -1.28 |
| 7714 | c1cnncc1/C=N/O                   | C00332246 | -11.05 | 0.09  | -19.16 | 7.79  | 0.24  |
| 7715 | CC(=C)COCC(=O)N                  | C00393731 | -11.05 | -2.85 | -13.15 | 4.48  | 0.47  |
| 7716 | CCCC(=O)C                        | C00901192 | -11.05 | -0.39 | -11.68 | 3.67  | -2.65 |
| 7717 | CCCCSCCO                         | C01640796 | -11.05 | -1.19 | -10.16 | 2.08  | -1.79 |
| 7718 | c1c(nc(s1)Br)Br                  | C02245232 | -11.05 | -1.57 | -13.87 | 2.83  | 1.56  |
| 7719 | Cn1cc(nc1)CO                     | C03880803 | -11.05 | -2.86 | -13.38 | 6.08  | -0.89 |
| 7720 | C/C(=C/C(=O)C)N/[O-]             | C04714960 | -11.05 | -0.94 | -10.62 | 2.04  | -1.53 |
| 7721 | Cc1c(nnn1)[O-]                   | C05285766 | -11.05 | -2.99 | -17.25 | 8.2   | 0.99  |
| 7722 | C=Cn1cccc1O                      | C05377636 | -11.05 | -2.42 | -13.37 | 4.92  | -0.18 |
| 7723 | CC[C@H](C)S                      | C06661091 | -11.05 | -0.41 | -8.71  | 0.77  | -2.71 |
| 7724 | CCn1c(nnn1)[S-]                  | C06880576 | -11.05 | -1.63 | -12.7  | 4.72  | -1.43 |
| 7725 | c1cc(ccc1NC(=O)/C=N/O)F          | C07991482 | -11.05 | -2.49 | -18.88 | 10.22 | 0.1   |
| 7726 | c1cnc(c1Br)CO                    | C13213192 | -11.05 | -2.51 | -11.48 | 3.53  | -0.59 |
| 7727 | [C@H](C(=O)F)F)Cl                | C16159208 | -11.05 | 0.02  | -12.49 | 2.88  | -1.45 |
| 7728 | c1c(c(n[nH]c1=O)Cl)[O-]          | C17063299 | -11.05 | -2.35 | -18.52 | 6.14  | 3.68  |
| 7729 | COCC1cccc(c1)N                   | C19398609 | -11.05 | -0.21 | -13.38 | 4     | -1.46 |
| 7730 | C=CCOCC#N                        | C26515255 | -11.05 | -1.33 | -12.63 | 5.4   | -2.49 |
| 7731 | C1COCC=C1C(=O)C(F)F)Br           | C32628529 | -11.05 | 1.38  | -12.86 | 3.09  | -2.66 |
| 7732 | c1cc(sc1)C(=O)NN                 | C00153618 | -11.04 | -3.1  | -14.18 | 6.47  | -0.23 |
| 7733 | C[C@H](C)C)O                     | C01692450 | -11.04 | -0.66 | -11.15 | 1.67  | -0.9  |
| 7734 | c1cnn(c1)c2nncn2N                | C02454447 | -11.04 | -1.87 | -13.11 | 8.63  | -4.69 |
| 7735 | Cc1ccccc1/C=N/O                  | C02573583 | -11.04 | -0.67 | -13.32 | 5.16  | -2.2  |
| 7736 | c1(nnc(s1)Br)Br                  | C05003393 | -11.04 | -1.26 | -13.42 | 2.49  | 1.14  |

|      |                                  |           |        |       |        |       |       |
|------|----------------------------------|-----------|--------|-------|--------|-------|-------|
| 7737 | CN(C=S)N                         | C05688656 | -11.04 | -3.67 | -13.38 | 2.88  | 3.13  |
| 7738 | Cc1ncc(c(n1)N)C=O                | C11919726 | -11.04 | -6.39 | -9.64  | 5.92  | -0.93 |
| 7739 | c1[nH]c2c(n1)C(=N+)([N2])[O-]N   | C17173461 | -11.04 | -8.86 | -17.09 | 15.05 | -0.13 |
| 7740 | CC[C@H](c1cccc1)Cl               | C32005476 | -11.04 | 1.76  | -11.65 | 2.84  | -4    |
| 7741 | Cc1ccc(c(c1)O)NC(=O)C            | C00409297 | -11.03 | -1.26 | -15.35 | 6.61  | -1.03 |
| 7742 | CCOC(=O)C=C(\C)/C#N              | C01679009 | -11.03 | 0.3   | -11.33 | 3.51  | -3.51 |
| 7743 | CNNC(=O)OC                       | C01766230 | -11.03 | -2.17 | -14.3  | 4.59  | 0.86  |
| 7744 | Cn1c(=O)[nH][nH]c1=S             | C04204671 | -11.03 | -6.6  | -15.37 | 11.94 | -1.01 |
| 7745 | C#C/C=NNC(=O)N                   | C04962248 | -11.03 | -3.05 | -16.51 | 7.1   | 1.42  |
| 7746 | C[C@H]1CCOC1                     | C06037606 | -11.03 | -0.24 | -10.61 | 1.48  | -1.66 |
| 7747 | Cc1c(scn1)C(=O)C                 | C06069129 | -11.03 | 1.23  | -17.33 | 5.38  | -0.31 |
| 7748 | c1c(cn(n1)CC(F)F)C=O             | C12357569 | -11.03 | -3.45 | -12.94 | 8.08  | -2.72 |
| 7749 | CC(C)/C(=N)O/C                   | C14590616 | -11.03 | -1.44 | -12.65 | 4.13  | -1.07 |
| 7750 | c1cncc(=O)[nH]1                  | C14684052 | -11.03 | -2.22 | -16.04 | 4.97  | 2.26  |
| 7751 | CCc1ccc(nc1)C=O                  | C19090982 | -11.03 | -0.56 | -11.47 | 3.97  | -2.97 |
| 7752 | c1c(nc(cn1)Cl)NN                 | C20282017 | -11.03 | -3.98 | -13.23 | 6.1   | 0.09  |
| 7753 | Cc1cncc(cc1)Cl                   | C21981799 | -11.03 | 1.39  | -11.6  | 2.44  | -3.26 |
| 7754 | C1C[C@H](OC1)N=C=S               | C26475807 | -11.03 | 0.71  | -14.47 | 3.23  | -0.51 |
| 7755 | COCC(=O)CNC(=S)NN                | C26515630 | -11.03 | -3.09 | -16.12 | 9.05  | -0.87 |
| 7756 | C[C@H]1CC=NN1                    | C28224152 | -11.03 | 0.09  | -13.19 | 2.84  | -0.77 |
| 7757 | c1c(ncn1)C(=O)NN                 | C30677889 | -11.03 | -3.87 | -18.05 | 7.85  | 3.04  |
| 7758 | C1C[C@H](OC1)CBr                 | C00158845 | -11.02 | -0.24 | -10.78 | 2.38  | -2.38 |
| 7759 | c1cc(ccc1)NN=C(C#N)C#N)F         | C00358054 | -11.02 | -1.8  | -10.95 | 4.34  | -2.61 |
| 7760 | C=C[C@H]1COCC(=O)O1              | C00403302 | -11.02 | -0.63 | -14.91 | 6.93  | -2.4  |
| 7761 | c1c[n+](ccc1Cl)[O-]              | C00407058 | -11.02 | -1.64 | -17.78 | 11.02 | -2.63 |
| 7762 | c1ccc(cc1)[C@H](C#C)BrO          | C01304686 | -11.02 | -0.39 | -13.97 | 2.86  | 0.48  |
| 7763 | c1cc(nc(c1)F)NNC(=O)N            | C01391062 | -11.02 | -2.4  | -19.28 | 10.27 | 0.39  |
| 7764 | CC(=O)N(CN(C)[N+](=O)[O-])       | C01610828 | -11.02 | 0.96  | -17.78 | 6.44  | -0.63 |
| 7765 | C[C@H](C1CCCC1)O                 | C01700002 | -11.02 | -1.31 | -9.33  | 1.32  | -1.69 |
| 7766 | COc1c(=O)c(=O)c1OC               | C02145277 | -11.02 | -2.87 | -11.46 | 3.82  | -0.51 |
| 7767 | CCn1ccc(n1)C(=O)C                | C02536625 | -11.02 | -2.21 | -12.05 | 6.25  | -3    |
| 7768 | Cc1ccc(cc1)P(=O)([O-])[O-]       | C03097907 | -11.02 | -3.41 | -14.1  | 8.15  | -1.66 |
| 7769 | CCC1=CCCC1=O                     | C04273483 | -11.02 | -1.02 | -11.76 | 5.24  | -3.48 |
| 7770 | C(#N)c1c(c2c(nc1n)non2)N         | C04343049 | -11.02 | -2.76 | -13.49 | 5.07  | 0.16  |
| 7771 | C1C[C@H](C=C1)C(=O)N             | C05217616 | -11.02 | -2.16 | -13.29 | 5.07  | -0.64 |
| 7772 | CC[C@H](C)S                      | C05298826 | -11.02 | -0.55 | -10.4  | 0.66  | -0.72 |
| 7773 | C[C@H](CO)N(N=O)O                | C06020795 | -11.02 | -4.52 | -12.7  | 4.8   | 1.4   |
| 7774 | c1cncc(cc1C=O)F                  | C08698252 | -11.02 | -1.79 | -16.25 | 8.08  | -1.05 |
| 7775 | [C@H](C(=O)N)(F)I                | C08698286 | -11.02 | -2.42 | -13.23 | 4.4   | 0.23  |
| 7776 | Cc1nc2c(ccn2)c(=O)c1O            | C11919574 | -11.02 | 0.86  | -17.82 | 8.12  | -2.18 |
| 7777 | CO/N=C(C(=N)O)N)/N               | C13477947 | -11.02 | -2.41 | -13.03 | 3.55  | 0.87  |
| 7778 | C[C@H](O)OC(F)F                  | C16159293 | -11.02 | -1.55 | -11.69 | 2.05  | 0.17  |
| 7779 | Cc1c(c(=O)[nH]cn1)N              | C17062002 | -11.02 | -3.01 | -15.63 | 5.39  | 2.23  |
| 7780 | CSc1nc(cnn1)[O-]                 | C18181842 | -11.02 | -3.4  | -15.31 | 7.49  | 0.2   |
| 7781 | COCC(=O)CNCC=C                   | C20033808 | -11.02 | 0.04  | -13.7  | 3.96  | -1.32 |
| 7782 | C1COCC[C@H]1C=N/O                | C20283003 | -11.02 | -3.27 | -13.15 | 4.81  | 0.59  |
| 7783 | c1cc(ccc1OC(F)F)Br               | C00056737 | -11.01 | 0.11  | -10.83 | 1.26  | -1.55 |
| 7784 | c1cc(ccc1CO)OC(F)F               | C00167206 | -11.01 | -0.9  | -13.38 | 3.47  | -0.2  |
| 7785 | Cc1nc(c(o1)N)C#N                 | C00335545 | -11.01 | -4.32 | -15.15 | 6.51  | 1.96  |
| 7786 | CNc1nnnn1C                       | C01577919 | -11.01 | -2.17 | -14.9  | 7.69  | -1.63 |
| 7787 | CC[C@H](C[C@H]1CCCO1)O           | C01597025 | -11.01 | 0.55  | -14.34 | 1.42  | 1.36  |
| 7788 | CCSC#N                           | C01648252 | -11.01 | -0.98 | -10.74 | 2.99  | -2.27 |
| 7789 | c1cc(c(cc1OC(F)F)N)O             | C02386507 | -11.01 | 0.18  | -15.06 | 3.03  | 0.83  |
| 7790 | c1cc(cc(c1)OC(F)F)C=O            | C02560126 | -11.01 | -4.35 | -12.17 | 7.57  | -2.06 |
| 7791 | c1cc(c2nccn2c1)O                 | C03880832 | -11.01 | -2.54 | -15.33 | 8.54  | -1.68 |
| 7792 | CCOC(=O)[C@H](C)O                | C04291190 | -11.01 | -3.11 | -12.2  | 5.98  | -1.68 |
| 7793 | C(=O)[C@H](C(F)F)C(F)Cl          | C16159144 | -11.01 | -0.15 | -8.77  | 0.58  | -2.67 |
| 7794 | CCCC[C@H](C=C)C                  | C17377825 | -11.01 | -1.81 | -7.99  | 1.41  | -2.63 |
| 7795 | C1C=C[C@H]2[C@H]1CC2=O           | C19230141 | -11.01 | -0.65 | -11.06 | 3.95  | -3.25 |
| 7796 | Cc1cc(c[nH]c1)F                  | C21981955 | -11.01 | -3.43 | -14.34 | 6.98  | -0.22 |
| 7797 | c1cc2c(cc1S)OCO2                 | C31829378 | -11.01 | 0.21  | -12.37 | 3.66  | -2.51 |
| 7798 | c1cc2c(nsc2nc1)[O-]              | C00080837 | -11    | -3.03 | -14.22 | 6.84  | -0.6  |
| 7799 | Cn1cncc1CC#N                     | C00330926 | -11    | -1.41 | -15.26 | 9.25  | -3.58 |
| 7800 | c1cc(ccc1C=C/C)O                 | C01530240 | -11    | -1.92 | -16.55 | 7.51  | -0.03 |
| 7801 | CC(=O)C(=O)C=C(C(F)F)C(F)F       | C01673726 | -11    | -1.87 | -8.1   | 3.25  | -4.28 |
| 7802 | c1ccc(cc1)/C=C/C=N/O             | C01679302 | -11    | -1.31 | -13.88 | 4.36  | -0.17 |
| 7803 | CCOC(=O)CC=O                     | C01764589 | -11    | -3.59 | -14.32 | 7     | -0.08 |
| 7804 | c1ccc(c(c1)NN=C(C#N)C#N)F        | C02168607 | -11    | -0.23 | -12.2  | 4.23  | -2.8  |
| 7805 | CCc1ccc(cc1)O                    | C02566153 | -11    | -1.26 | -13.49 | 3.88  | -0.12 |
| 7806 | C[C@H](CBr)O                     | C03861677 | -11    | -1.56 | -11.54 | 2.48  | -0.38 |
| 7807 | c1[nH]c(c(n1)C(=O)N)[N+](=O)[O-] | C03944779 | -11    | -5.23 | -15.88 | 11.19 | -1.08 |
| 7808 | C1C[C@H](OC=C1)C=O               | C04529095 | -11    | -0.76 | -12.96 | 3.6   | -0.88 |
| 7809 | c1(c(=S)ssn1)Cl                  | C05510634 | -11    | -1.34 | -13.51 | 2.15  | 1.69  |
| 7810 | C1C[C@H](C[C@H](C1)SC#N)O        | C05975924 | -11    | -1.66 | -12.15 | 4.13  | -1.32 |
| 7811 | CS/C=C/c1cccc1                   | C06019647 | -11    | 0.08  | -12.22 | 2.28  | -1.14 |
| 7812 | CC1=CC[C@H](CC1)C#N              | C06130090 | -11    | -0.28 | -11.91 | 3.33  | -2.14 |
| 7813 | c1cc([nH]c1)c2[nH]c(=O)on2       | C12367568 | -11    | -0.46 | -16.11 | 6.87  | -1.3  |
| 7814 | C/C(=N)C1CCCC1)/N                | C15782363 | -11    | 0.57  | -14.03 | 4.84  | -2.38 |
| 7815 | CC(=O)c1ncccn1                   | C16696745 | -11    | -2.13 | -14.1  | 7.44  | -2.21 |
| 7816 | c1cc(ccc1C(=O)N=[N+]=[N-])[O-]   | C17724808 | -11    | 1.05  | -17.93 | 4.27  | 1.62  |
| 7817 | c1cncc(cc1CO)N                   | C19092522 | -11    | -3.22 | -13.96 | 5.12  | 1.05  |
| 7818 | Cc1nsc1C=O                       | C20443693 | -11    | 0.34  | -15.79 | 6.21  | -1.76 |
| 7819 | c1cc(oc1)c2ccc(o2)C=O            | C22201052 | -11    | 0.75  | -17.73 | 9.7   | -3.72 |
| 7820 | C[C@H](CCS)S                     | C25695480 | -11    | 0.76  | -10.93 | 2.2   | -3.04 |
| 7821 | C[C@H](C(=NH2+))N)[N+](=O)[O-]   | C26898076 | -11    | -5.69 | -16.24 | 11.6  | -0.67 |
| 7822 | CC(=O)C1CCCC1                    | C01681283 | -10.99 | 1.85  | -12.67 | 3.36  | -3.53 |
| 7823 | CCCOCCC                          | C02041060 | -10.99 | -0.19 | -11.17 | 1.1   | -0.72 |
| 7824 | CCO/C=C/C(=O)C(F)F               | C02557016 | -10.99 | 0.18  | -11.9  | 3.46  | -2.73 |
| 7825 | c1c(nc(s1)CC#N)CBr               | C03167461 | -10.99 | -2.11 | -13.6  | 8.04  | -3.31 |
| 7826 | c1c(c[nH]c(=O)c1N)C(F)F          | C03181875 | -10.99 | -3.8  | -12.34 | 5.44  | -0.29 |

|      |                                 |           |        |        |        |       |       |
|------|---------------------------------|-----------|--------|--------|--------|-------|-------|
| 7827 | C[C@@H](c1cccc1)S               | C04706573 | -10.99 | -0.8   | -7.48  | 1.71  | -4.42 |
| 7828 | CC(C)C@H](C#C)O                 | C05226739 | -10.99 | -0.9   | -10.75 | 1.97  | -1.3  |
| 7829 | C(=C(Cl)C(=O)N                  | C05282285 | -10.99 | -2.67  | -13.23 | 4.49  | 0.43  |
| 7830 | c1cc(cc(c1)N)C(F)F              | C12358779 | -10.99 | 0.81   | -12    | 2.67  | -2.47 |
| 7831 | COCC(=O)C=N/O                   | C14455583 | -10.99 | -1.89  | -15.41 | 6.34  | -0.03 |
| 7832 | c1[nH]c(=O)(c1N)[N+](=O)[O-]    | C15021887 | -10.99 | -2.6   | -17.78 | 7.42  | 1.97  |
| 7833 | c1[nH]c(c(n1)C(=O)NO)N          | C16954267 | -10.99 | -7.27  | -15.86 | 10.66 | 1.48  |
| 7834 | c1cc(c(c1NCCO)F)F               | C20044958 | -10.99 | -2.96  | -13.82 | 6.53  | -0.73 |
| 7835 | C1COC[C@H]1CCl                  | C20078000 | -10.99 | 0.43   | -11.17 | 1.86  | -2.11 |
| 7836 | c1cc(ccc1c2cc(no2)CC(=O)[O-])Cl | C20270420 | -10.99 | -0.47  | -13.45 | 7.15  | -4.22 |
| 7837 | CC(=O)n1cc(cn1)I                | C21301159 | -10.99 | -0.99  | -11.1  | 3.64  | -2.54 |
| 7838 | c1cccc1CCC=O                    | C22003337 | -10.99 | -3.94  | -10.6  | 6.35  | -2.79 |
| 7839 | CSc1c(c(=O)c1=O)N               | C26329862 | -10.99 | -4.63  | -13.38 | 7.5   | -0.49 |
| 7840 | c1cn2c(cc1)ncn2                 | C26894585 | -10.99 | -3.9   | -7.67  | 5.23  | -4.65 |
| 7841 | c1cncc(c1CO)Cl                  | C26898627 | -10.99 | -0.06  | -14.49 | 4.13  | -0.56 |
| 7842 | COc1ccc(c(c1)N)N                | C00152529 | -10.98 | -2     | -12.84 | 3.7   | 0.17  |
| 7843 | COc1ccc(cc1F)N                  | C00389573 | -10.98 | -2.46  | -11.94 | 4.7   | -1.27 |
| 7844 | COC(=O)C(=O)OC                  | C01532047 | -10.98 | 0.37   | -13.39 | 4.07  | -2.04 |
| 7845 | C[C@@H](C(C)C(=O)N              | C01594371 | -10.98 | -3.69  | -11.68 | 4.53  | -0.14 |
| 7846 | CC[C@H](/C=C/C)O                | C01609494 | -10.98 | -0.7   | -10.21 | 1.45  | -1.52 |
| 7847 | C=C/C=C/C1/CCOC1=O              | C02034937 | -10.98 | 1.24   | -15.94 | 7.05  | -3.33 |
| 7848 | C=CCCCC[N+](=O)[O-]             | C02557923 | -10.98 | -0.01  | -13.02 | 3.56  | -1.52 |
| 7849 | Cc1cncc(c1)C#N                  | C02582041 | -10.98 | 1.19   | -14.64 | 5.28  | -2.81 |
| 7850 | c1cnc(nc1)NC(=S)N               | C02582351 | -10.98 | -0.11  | -18.62 | 10.71 | -2.94 |
| 7851 | CC(=O)OCC=O                     | C02584547 | -10.98 | -1.68  | -14.27 | 6.6   | -1.63 |
| 7852 | C(Cl(=O)NCC(F)F)Cl              | C03252688 | -10.98 | -1.92  | -13.33 | 5.7   | -1.43 |
| 7853 | c1cc2c(cc1C#N)CCO2              | C04253977 | -10.98 | -1.77  | -10.08 | 4.36  | -3.49 |
| 7854 | CC(C)c1ccncc1                   | C08294971 | -10.98 | -1.52  | -8.64  | 2.58  | -3.4  |
| 7855 | CCc1nnc(o1)[S-]                 | C08731367 | -10.98 | -2.19  | -14.7  | 4.73  | 1.19  |
| 7856 | Cc1ccc(c(c1F)C#N                | C12359232 | -10.98 | 2.22   | -16.06 | 6.13  | -3.25 |
| 7857 | C1CC1c2[nH]c(nn2)[S-]           | C12505190 | -10.98 | 1.23   | -14.97 | 5.6   | -2.85 |
| 7858 | c1[nH]c(c(n1)[O-])C(=O)N        | C13283660 | -10.98 | -6.94  | -16.36 | 9.29  | 3.03  |
| 7859 | CC(=O)OCC(=O)OC                 | C14442398 | -10.98 | 0.46   | -14.77 | 5.97  | -2.64 |
| 7860 | C1CO[C@H](CO)Cl                 | C14983036 | -10.98 | -1.2   | -10.51 | 2.67  | -1.94 |
| 7861 | c1ccc(cc1)N/N=C(C#N)/C(=O)N     | C14983473 | -10.98 | -1.86  | -17.54 | 9.09  | -0.67 |
| 7862 | C/C=N/N(C)C                     | C20230282 | -10.98 | -0.85  | -11.73 | 3.24  | -1.64 |
| 7863 | Cc1cc(cnc1Br)F                  | C21299171 | -10.98 | 0.74   | -11.26 | 2.55  | -3.01 |
| 7864 | c1ccc(c1Br)C(=O)Cl              | C26340353 | -10.98 | 0.95   | -13.94 | 5     | -2.99 |
| 7865 | CCC(=O)CC                       | C01648158 | -10.97 | 0.66   | -12.37 | 3.49  | -2.74 |
| 7866 | CCN1CC1=C                       | C01684539 | -10.97 | -0.34  | -12.96 | 2.05  | 0.28  |
| 7867 | c1c(ncs1)C(=O)NN                | C02353142 | -10.97 | -3.88  | -15.18 | 6.84  | 1.25  |
| 7868 | Cc1ccc(cc1F)OC                  | C02512464 | -10.97 | 0.96   | -13.48 | 3.24  | -1.69 |
| 7869 | c1cc(c(cc1C#N)C(F)F)F           | C03880152 | -10.97 | -2.87  | -8.71  | 4.71  | -4.1  |
| 7870 | Cc1cc([nH]n1)C=O                | C04244055 | -10.97 | -0.25  | -15.56 | 5.93  | -1.09 |
| 7871 | C(#N)C(Cl)Cl                    | C04283780 | -10.97 | -0.26  | -11.65 | 3.15  | -2.21 |
| 7872 | C1[C@@H](C(C=C1)CC#N            | C04994803 | -10.97 | -1.68  | -10.02 | 5     | -4.27 |
| 7873 | CCO/C=C/C(=O)C(F)F              | C05952650 | -10.97 | -2.76  | -10.2  | 6     | -4    |
| 7874 | c1nc([nH]n1)NC2=NCCO2           | C06585097 | -10.97 | -0.08  | -19.26 | 4.99  | 3.37  |
| 7875 | C=CCNc1ncco1                    | C08699322 | -10.97 | -1.29  | -13.33 | 4.13  | -0.49 |
| 7876 | Cc1nnc(s1)NN                    | C09584705 | -10.97 | -4.4   | -13    | 6.64  | -0.2  |
| 7877 | c1c(=O)[nH]cnc1NN               | C13303321 | -10.97 | -1.8   | -17.28 | 5.84  | 2.27  |
| 7878 | C/C=C/C=C/C=O                   | C13540493 | -10.97 | -0.31  | -12.43 | 4.73  | -2.96 |
| 7879 | CCOC1CCCC1O                     | G2008A004 | -10.97 | -1.72  | -11.32 | 4.09  | -2.02 |
| 7880 | Oc1c(cccc1)CC=C                 | W2004A002 | -10.97 | -0.58  | -10.25 | 2.71  | -2.86 |
| 7881 | c1cc(c(cc1C(F)F)F)N             | C00092915 | -10.96 | -5.63  | -7.59  | 3.24  | -0.98 |
| 7882 | CCOC(=O)c1cncc1C                | C00156448 | -10.96 | -0.1   | -12.88 | 5.19  | -3.17 |
| 7883 | c1c(ccnc1C#N)C#N                | C00332342 | -10.96 | -1.33  | -12.71 | 5.74  | -2.67 |
| 7884 | CCOc1cccc(c1)Cl                 | C00403340 | -10.96 | -2.64  | -9.58  | 2.12  | -0.87 |
| 7885 | c1c([n+](c(n1)Cl)[O-]           | C01581402 | -10.96 | -3.81  | -17.24 | 11.37 | -1.28 |
| 7886 | CC(C)SCCO                       | C01596246 | -10.96 | -3.24  | -9.06  | 2.25  | -0.91 |
| 7887 | CCCc1ccc(cc1)O                  | C01692500 | -10.96 | -1     | -12.58 | 2.52  | 0.11  |
| 7888 | CC(C)SCC#C                      | C01732652 | -10.96 | -0.52  | -11.18 | 2.55  | -1.82 |
| 7889 | C1CN(C(=O)N1)C(=O)Cl            | C02083216 | -10.96 | -2.14  | -16.13 | 7.05  | 0.26  |
| 7890 | CC/C=C/C(=O)OC                  | C02508321 | -10.96 | -0.96  | -10.53 | 3.74  | -3.21 |
| 7891 | CCOCCC(=O)C                     | C02522795 | -10.96 | -1     | -11.94 | 4.17  | -2.2  |
| 7892 | CCO[C@H]1CCC=CO1                | C03875719 | -10.96 | 0.2    | -10.54 | 2.33  | -2.96 |
| 7893 | c1c(c2c(c1F)F)nc([nH]2)F        | C04430556 | -10.96 | -4.68  | -9.55  | 6.64  | -3.36 |
| 7894 | CN(C(=O)c1cccc1)O               | C05497333 | -10.96 | -3.28  | -12.77 | 6.67  | -1.59 |
| 7895 | COCCSC(=NH2+)N                  | C05607027 | -10.96 | -2.73  | -13.5  | 3.09  | 2.17  |
| 7896 | c1c(on[n+1]CCC#N)[O-]           | C06224219 | -10.96 | -3.24  | -17.59 | 12.93 | -3.06 |
| 7897 | Cc1cncc(c1)N=C=S                | C11535835 | -10.96 | 0.54   | -15.53 | 4.2   | -0.17 |
| 7898 | CCC/C=N/O                       | C13514543 | -10.96 | -3.19  | -11.45 | 4.18  | -0.49 |
| 7899 | C(=O)([C@](C(F)F)F)Cl           | C16159142 | -10.96 | -0.32  | -8.71  | 0.73  | -2.65 |
| 7900 | CC[C@H](/C=C/C)O                | C17377821 | -10.96 | -0.59  | -10.11 | 1.25  | -1.51 |
| 7901 | c1ccc2c(c1)nc(s2)F              | C00152323 | -10.95 | -0.68  | -14.17 | 4.16  | -0.26 |
| 7902 | c1ccc(cc1)OC(=O)Cl              | C00161080 | -10.95 | -1.87  | -10.26 | 5.96  | -4.79 |
| 7903 | Cc1c(no[n+1][O-])C(=O)N         | C01504370 | -10.95 | -3.86  | -15.09 | 7.87  | 0.13  |
| 7904 | CC(C)Sc1[nH]ncn1                | C01573438 | -10.95 | 1.56   | -12.84 | 3.74  | -3.41 |
| 7905 | CCC(CC)O                        | C01648159 | -10.95 | -1.2   | -9.96  | 1.28  | -1.06 |
| 7906 | CC(C)CN=C=S                     | C01846032 | -10.95 | -0.19  | -12.29 | 1.17  | 0.37  |
| 7907 | CSc1cn[nH]c(=O)n1               | C02568446 | -10.95 | -3.53  | -15.98 | 7.99  | 0.57  |
| 7908 | C[C@H](C)COC1                   | C04918919 | -10.95 | -0.39  | -10.46 | 1.51  | -1.6  |
| 7909 | c1c(nnn1CO)[N+](=O)[O-]         | C05567174 | -10.95 | -2.78  | -17.82 | 9.05  | 0.61  |
| 7910 | [H]N=C(c1cc2c(cc1n)non2)O       | C05670199 | -10.95 | -10.51 | -8.09  | 4.63  | 3.02  |
| 7911 | CN(C)C(=S)N                     | C05688714 | -10.95 | -1.14  | -13.69 | 2.77  | 1.12  |
| 7912 | Cc1cnc(nc1)[O-]SC               | C08616644 | -10.95 | -2.09  | -13.07 | 6.21  | -2    |
| 7913 | CC[C@H](C(=O)C(F)F)Br           | C08700959 | -10.95 | -0.42  | -9.02  | 1.69  | -3.2  |
| 7914 | c1ccc2c(c1)[nH]c(=S)[nH]2       | C12341568 | -10.95 | -1.97  | -15.06 | 9.4   | -3.32 |
| 7915 | C=CCSc1ccccn1                   | C13284240 | -10.95 | 0.08   | -10.28 | 3.35  | -4.11 |
| 7916 | CCc1[nH]c2cccnc2n1              | C26439558 | -10.95 | -3.1   | -11.99 | 7.22  | -3.08 |

|      |                                    |           |        |       |        |      |       |
|------|------------------------------------|-----------|--------|-------|--------|------|-------|
| 7917 | C(COC(F)(F)F)O                     | C32629454 | -10.95 | -3.26 | -12.96 | 4.21 | 1.05  |
| 7918 | c1ccc2c(c1)cc(o2)Br                | C00158632 | -10.94 | -1.36 | -12.24 | 3.26 | -0.59 |
| 7919 | C(CCl)OCCCl                        | C01599332 | -10.94 | -0.31 | -11.21 | 3.23 | -2.66 |
| 7920 | CCCCCN=C=O                         | C01841178 | -10.94 | -1.78 | -10.68 | 1.75 | -0.22 |
| 7921 | CCCCOCC                            | C02031618 | -10.94 | -0.47 | -10.84 | 1.18 | -0.81 |
| 7922 | C1CSC[C@H]1O                       | C02033249 | -10.94 | -1.71 | -11.63 | 2.81 | -0.4  |
| 7923 | c1c(nn(c1C(F)F)N+)(=O)[O-])C(F)F   | C02537490 | -10.94 | -4.36 | -10.31 | 7.2  | -3.47 |
| 7924 | C=CCOC(C(F)F)F(C(F)F)F             | C02584266 | -10.94 | 0.01  | -7.75  | 0.89 | -4.08 |
| 7925 | CO[C@H]1C=C[C@H](O1)OC             | C03860391 | -10.94 | -2.07 | -11.66 | 3.9  | -1.12 |
| 7926 | C(N=C=S)Cl                         | C03860854 | -10.94 | -0.44 | -13.49 | 2.07 | 0.92  |
| 7927 | CCCC[C@H](C=C)O                    | C04521547 | -10.94 | -0.38 | -12.16 | 1.44 | 0.16  |
| 7928 | CC(=NNC)C                          | C04744395 | -10.94 | -0.61 | -11.7  | 2.76 | -1.17 |
| 7929 | CCOC(=O)c1nc[n-]n1                 | C05575597 | -10.94 | -2.24 | -13.06 | 4.16 | 0.19  |
| 7930 | Cc1cccn1C=C                        | C06303114 | -10.94 | -1.89 | -9.68  | 2.82 | -2.19 |
| 7931 | COc1cc(ccn1)Br                     | C08698203 | -10.94 | -0.19 | -11.91 | 2.71 | -1.55 |
| 7932 | Cc1cc(on1)CO                       | C12370187 | -10.94 | -1.81 | -14.94 | 5.85 | -0.03 |
| 7933 | Cc1cc(cnc1N)Cl                     | C19735877 | -10.94 | 0.28  | -13.06 | 3.85 | -2    |
| 7934 | CCc1cncnc1Cl                       | C21299588 | -10.94 | -1.32 | -9.85  | 3.42 | -3.19 |
| 7935 | c1cc(c(cc1C(=O)NN)F)F              | C00127687 | -10.93 | -3.1  | -15.82 | 8.91 | -0.92 |
| 7936 | CC1=NNC(=O)CC1                     | C00152911 | -10.93 | -1.32 | -15.56 | 6.57 | -0.62 |
| 7937 | C(c1[nH]nc(n1)CO)O                 | C01509969 | -10.93 | -7.03 | -16.92 | 7.93 | 5.09  |
| 7938 | c1(=O)(c(nsc1Cl)Cl                 | C01608420 | -10.93 | -0.39 | -11.62 | 2.51 | -1.43 |
| 7939 | C[C@H](COC(=O)C)O                  | C01668304 | -10.93 | -1.65 | -14.07 | 5.45 | -0.67 |
| 7940 | Cc1ccn2c(c1)nnn2                   | C01683868 | -10.93 | -3.83 | -14.29 | 9.65 | -2.47 |
| 7941 | Cn1c(=S)[nH]c(=O)cn1               | C01689467 | -10.93 | -1.54 | -15.09 | 6.8  | -1.11 |
| 7942 | C=C(COCCO)Cl                       | C01708309 | -10.93 | -2.44 | -13.33 | 4.86 | -0.02 |
| 7943 | C/C=C(C)/[C@H](C)O                 | C01730156 | -10.93 | -0.98 | -10.33 | 1.6  | -1.23 |
| 7944 | COCCCB                             | C02392168 | -10.93 | 1.03  | -11.8  | 1.94 | -2.1  |
| 7945 | C(=O)(OC(C)Cl)Cl                   | C04261978 | -10.93 | 1.05  | -12.25 | 0.77 | -0.5  |
| 7946 | c1(c([nH]nc1O)N)N=O                | C04552327 | -10.93 | -5.99 | -18.39 | 9.42 | 4.03  |
| 7947 | C(=O)(C(C(F)F)F)F)NN               | C04742735 | -10.93 | -3.97 | -11.37 | 4.28 | 0.13  |
| 7948 | CCC1=CC(=O)CCC1                    | C04802706 | -10.93 | -0.57 | -14.29 | 5.02 | -1.09 |
| 7949 | CCOc1cnc(o1)C                      | C05336805 | -10.93 | -1.51 | -13.01 | 3.88 | -0.29 |
| 7950 | c1cc(ccc1N)OCC(F)F                 | C05933315 | -10.93 | -1.26 | -13.48 | 6.01 | -2.2  |
| 7951 | CCn1c(cc(n1)C(F)F)N                | C12357880 | -10.93 | -4.77 | -9.31  | 5.37 | -2.23 |
| 7952 | c1cnc(nc1/C=N/O)N                  | C12505529 | -10.93 | -4.71 | -13.69 | 7.19 | 0.29  |
| 7953 | c1cc(sc1)SCCBr                     | C20078018 | -10.93 | -1.01 | -7.19  | 2.02 | -4.75 |
| 7954 | c1cc(c(c(c1)Cl)CO)F                | C00154651 | -10.92 | -2.71 | -12.7  | 3.87 | 0.62  |
| 7955 | c1c(cc(cc1O)O)N                    | C00157870 | -10.92 | -3.55 | -14.4  | 4.53 | 2.5   |
| 7956 | Cc1ccc(cc1)CO                      | C00896402 | -10.92 | -1.72 | -10.86 | 3.33 | -1.67 |
| 7957 | C(COCCCl)O                         | C01641057 | -10.92 | -2.43 | -13.07 | 4.33 | 0.25  |
| 7958 | C/C=C(C=O)Cl                       | C01670683 | -10.92 | -2.19 | -13.78 | 6.25 | -1.2  |
| 7959 | CCOC(=O)[C@H]1C[C@H]1C#N           | C01728350 | -10.92 | -1.92 | -10.71 | 5.48 | -3.77 |
| 7960 | C1CSCCO1                           | C03861039 | -10.92 | 0.05  | -11.42 | 2.13 | -1.68 |
| 7961 | c1ccc(c(c1)NNC(=S)N)F              | C03883266 | -10.92 | 0.92  | -16.95 | 8.01 | -2.89 |
| 7962 | c1cc(c(c1)[N+](=O)[O-])N)N         | C04087238 | -10.92 | -2.91 | -13.02 | 5.96 | -0.96 |
| 7963 | COc1ccc(cn1)O                      | C04204273 | -10.92 | -1.23 | -14.88 | 4.03 | 1.17  |
| 7964 | C1CCC(C1)N=[N+]=[N-]               | C04748490 | -10.92 | 0.76  | -12.63 | 1.17 | -0.22 |
| 7965 | C1[C@H](C=C[C@H]1O)O               | C04761430 | -10.92 | -2.58 | -13.42 | 3.2  | 1.88  |
| 7966 | CC(C)C[C@H](C#C)O                  | C05227368 | -10.92 | -0.06 | -11.3  | 2.17 | -1.72 |
| 7967 | C(CO)NC(=S)C(=S)N                  | C05501770 | -10.92 | -4.83 | -14.5  | 3.4  | 5.01  |
| 7968 | C1[C@H]2[C@H]1C(=O)OC2=O           | C08100975 | -10.92 | -1.85 | -13.28 | 7.32 | -3.12 |
| 7969 | CSsc1nc(c(nn1)CF)[O-]              | C08619367 | -10.92 | -4.52 | -15.01 | 9.45 | -0.84 |
| 7970 | COc1cc(c(cc1F)F)N                  | C08729943 | -10.92 | -2.32 | -11.41 | 4.17 | -1.37 |
| 7971 | Cc1ccc(s1)N=C=O                    | C12370780 | -10.92 | 0.62  | -11.7  | 2.07 | -1.91 |
| 7972 | COc1cccnc1N                        | C14982093 | -10.92 | -1.69 | -12.78 | 4.28 | -0.72 |
| 7973 | c1cc2c(c1)F)CCN2                   | C16083046 | -10.92 | -1.67 | -9.5   | 3.01 | -2.76 |
| 7974 | CSsc1nsc2n1c(nn2)N                 | C16928843 | -10.92 | -4.14 | -10.9  | 7.78 | -3.66 |
| 7975 | c1(nc(on1)N)N                      | C16951984 | -10.92 | -5.84 | -14.98 | 8.24 | 1.65  |
| 7976 | C(CON)CSC(=NH2+)N                  | C17004063 | -10.92 | -0.89 | -14.43 | 3.48 | 0.93  |
| 7977 | c1c(=O)c(c([nH]n1)[O-])Cl          | C17062760 | -10.92 | -3.59 | -16.48 | 5.62 | 3.53  |
| 7978 | C(=C(N)N)C(=O)N                    | C20405516 | -10.92 | -5.37 | -15.4  | 6.81 | 3.04  |
| 7979 | [H]/N=C(\Nc1cccc1F)/N/C(=N/[H])/NN | C20458476 | -10.92 | -1.72 | -11.99 | 6.71 | -3.92 |
| 7980 | c1cc(c(nc1)Cl)C#N                  | C00091827 | -10.91 | -1.7  | -12.65 | 6.03 | -2.59 |
| 7981 | c1cc(ccc1C(=O)NN)F                 | C00153714 | -10.91 | -3.01 | -14.05 | 7.05 | -0.9  |
| 7982 | C1CCC(C1)O                         | C00901228 | -10.91 | -0.97 | -10.87 | 1.67 | -0.74 |
| 7983 | CCOC(=O)[C@H](C)CCl                | C01690412 | -10.91 | 1.29  | -10.84 | 2.49 | -3.86 |
| 7984 | CC(=O)OC[C@H](CC)O                 | C02041688 | -10.91 | -0.94 | -16.16 | 5.85 | 0.35  |
| 7985 | CC(=O)OCCSC                        | C02165902 | -10.91 | 1.57  | -13.87 | 4.69 | -3.31 |
| 7986 | CCCSsc1[nH]ncn1                    | C02243770 | -10.91 | -2.07 | -11.45 | 6.33 | -3.72 |
| 7987 | C=CCN1C(=O)CSC1=O                  | C02798866 | -10.91 | 1.25  | -14.81 | 4.76 | -2.1  |
| 7988 | C#CCOC(=O)C(C(F)F)C(F)F            | C03100049 | -10.91 | -0.23 | -9.68  | 4.47 | -5.46 |
| 7989 | Cc1ccc(c1)OC(=O)C                  | C04284473 | -10.91 | -1.62 | -10.25 | 5.78 | -4.83 |
| 7990 | CCCC/C=C/C(=O)C(F)F/[O-]           | C04552333 | -10.91 | -2.86 | -7.16  | 2.42 | -3.32 |
| 7991 | C[C@H]1C(=O)NC(=S)N1               | C05735524 | -10.91 | -1.23 | -16.18 | 3.58 | 2.92  |
| 7992 | c1nc(c(c(n1)NN)N)N                 | C05940982 | -10.91 | -4.12 | -13.67 | 5.73 | 1.15  |
| 7993 | c1cc(cnc1)c2nsc(=O)o2              | C06536527 | -10.91 | -0.69 | -15.28 | 4.12 | 0.93  |
| 7994 | CCn1ccc(n1)CO                      | C12398019 | -10.91 | -4.45 | -11.79 | 5.83 | -0.51 |
| 7995 | CCc1cc(on1)CO                      | C12398318 | -10.91 | -1.82 | -13.64 | 5.63 | -1.08 |
| 7996 | c1cc(=O)[nH]cc1C(=O)N              | C12505139 | -10.91 | -6.98 | -15.03 | 7.6  | 3.5   |
| 7997 | CCc1nc(on1)[C@H](C)Cl              | C12760976 | -10.91 | 0.07  | -11.44 | 3.38 | -2.91 |
| 7998 | C[C@H](/C=N/O)c1cccc1              | C13537506 | -10.91 | -2.73 | -10.96 | 5.28 | -2.5  |
| 7999 | COc1ccc(nc1)C#N                    | C14628952 | -10.91 | 1.47  | -15.99 | 5.31 | -1.7  |
| 8000 | C=CC[C@H]1CC(C)/C1=N/O             | C17175976 | -10.91 | 0.02  | -12.87 | 4.25 | -2.31 |
| 8001 | c1cc(ccc1NN)S(C)F)F                | C21298186 | -10.91 | -0.37 | -11.82 | 4.02 | -2.74 |
| 8002 | c1cc(cc(c1)F)/C=C/C(=O)N           | C25723331 | -10.91 | -1.21 | -15.96 | 7.86 | -1.6  |
| 8003 | c1cc(sc1CB)C#N                     | C26422793 | -10.91 | -1.71 | -8.97  | 3.97 | -4.21 |
| 8004 | CCOc1ccc(c(c1)N)Cl                 | C32006644 | -10.91 | -1.03 | -10.72 | 3.2  | -2.36 |
| 8005 | CCOC(=O)c1cncnc1                   | C00404120 | -10.9  | 0.46  | -12.03 | 3.97 | -3.29 |
| 8006 | c1cnc2c(n1)cncn2                   | C00897037 | -10.9  | -4    | -13.72 | 8.31 | -1.49 |



|      |                              |           |        |       |        |       |       |
|------|------------------------------|-----------|--------|-------|--------|-------|-------|
| 8007 | CC(C)CC(=O)C                 | C01482107 | -10.9  | -0.43 | -10.76 | 3.35  | -3.06 |
| 8008 | C=C1CC(C1)C#N                | C02018664 | -10.9  | 0.36  | -12.87 | 4.9   | -3.29 |
| 8009 | C[C@@H](C=C)O                | C02034518 | -10.9  | -1.45 | -11.38 | 2.01  | -0.08 |
| 8010 | C[C@H](C1CCCC1)O             | C02042927 | -10.9  | -0.22 | -9.97  | 1.16  | -1.87 |
| 8011 | C/C=C/[C@@H](CC(=C)C)O       | C02166487 | -10.9  | -0.75 | -11.58 | 1.66  | -0.24 |
| 8012 | CC(=O)c1ccn(c1)C             | C02539414 | -10.9  | -1.54 | -11.87 | 6.01  | -3.5  |
| 8013 | c1ccc(cc1)C2OCCO2            | C02571426 | -10.9  | -0.97 | -10.11 | 3.33  | -3.14 |
| 8014 | Cc1ccc(cc1)OBr               | C12359324 | -10.9  | -2.5  | -11.93 | 2.65  | 0.88  |
| 8015 | c1c[nH]c(=O)c1[O-]Br         | C14982237 | -10.9  | -1.91 | -16.78 | 5.19  | 2.6   |
| 8016 | CCc1nc(no1)CCl               | C20363164 | -10.9  | -0.87 | -12.54 | 4.28  | -1.77 |
| 8017 | c1([nH]c(=S)nc(n1)N)N        | C01586434 | -10.89 | -1.49 | -12.52 | 4.62  | -1.5  |
| 8018 | C[C@@H](C(=O)OC)Br           | C01589664 | -10.89 | 0.36  | -11.77 | 3.27  | -2.74 |
| 8019 | Cc1ccc(c(c1)O)CCl            | C01595511 | -10.89 | -2.44 | -12.27 | 3.61  | 0.2   |
| 8020 | C[C@@H]1CCC(=O)C1            | C01621822 | -10.89 | -0.62 | -10.66 | 3.22  | -2.83 |
| 8021 | CCn1cnc(=O)[nH]c1=O          | C01708261 | -10.89 | -3.98 | -18.21 | 11.84 | -0.54 |
| 8022 | C[C@@H]1[C@H](O1)C(F)(F)F    | C02560333 | -10.89 | -1.06 | -11.33 | 2.94  | -1.44 |
| 8023 | COC(=O)C(F)F                 | C02579127 | -10.89 | -0.92 | -12.81 | 4.67  | -1.84 |
| 8024 | c1cc(nc(c1)F)C(F)(F)F        | C02598026 | -10.89 | 0.88  | -14.91 | 5.54  | -2.4  |
| 8025 | CCCCc1cc[nH]n1               | C03628192 | -10.89 | -1.48 | -9.64  | 3.25  | -3.02 |
| 8026 | CCC(=O)C(=O)OCC              | C04528565 | -10.89 | -0.37 | -11.86 | 3.38  | -2.03 |
| 8027 | CN(C)/C(=N)C#N/N             | C05446329 | -10.89 | 2.22  | -15.98 | 7.2   | -4.34 |
| 8028 | c1ccc(c(c1)N)C(S)N/F         | C06095140 | -10.89 | -1.41 | -17.88 | 11.11 | -2.71 |
| 8029 | C([C@@](OC(F)(F)F)Br)(F)F    | C08698308 | -10.89 | 0.32  | -11.19 | 2.02  | -2.03 |
| 8030 | CCn1ccc(n1)CC#N              | C12397777 | -10.89 | -2    | -14.73 | 9     | -3.16 |
| 8031 | C[C@H](CC=C)C=O              | C14592828 | -10.89 | -0.18 | -11.86 | 3.89  | -2.75 |
| 8032 | c1nc([nH]n1)SSc2[nH]ncn2     | C17957808 | -10.89 | -2.96 | -13.27 | 8.66  | -3.33 |
| 8033 | C1C(=O)N[C@H](S1)N           | C25952641 | -10.89 | -3    | -14.86 | 5.03  | 1.93  |
| 8034 | COCc1csc(n1)N                | C31772050 | -10.89 | -2.17 | -13.45 | 5.28  | -0.55 |
| 8035 | Cc1ccc(o1)/C=C/C(=O)C        | C00259259 | -10.88 | -1    | -13.2  | 5.29  | -1.97 |
| 8036 | c1cc(ccc1NC(=O)NO)Cl         | C00395135 | -10.88 | -3.41 | -16.85 | 10.26 | -0.88 |
| 8037 | COC(=O)Cn1cncn1              | C01107120 | -10.88 | -0.26 | -17.74 | 8.91  | -1.8  |
| 8038 | c1c(csc1C=O)CCl              | C01296251 | -10.88 | -1.71 | -14.11 | 5.56  | -0.62 |
| 8039 | C/C=C/C=O                    | C01686876 | -10.88 | -1.25 | -12.43 | 4.75  | -1.95 |
| 8040 | c1([nH]c(=O)O)c2n[nH]c(=O)O2 | C01708978 | -10.88 | -0.73 | -21.76 | 5.87  | 5.75  |
| 8041 | C[C@@H](C#C)OC               | C02025155 | -10.88 | -1.03 | -11.16 | 2.82  | -1.51 |
| 8042 | COC[C@@H](C=C)O              | C02036145 | -10.88 | -0.77 | -13.21 | 2.84  | 0.26  |
| 8043 | CC[C@H](C=C)C(O)             | C02164152 | -10.88 | -0.11 | -9.71  | 1.18  | -2.23 |
| 8044 | C[C@@H](C(=O)C)OC(=O)C       | C02169175 | -10.88 | 0.26  | -14.25 | 6.48  | -3.38 |
| 8045 | C[C@H](c1ccccc1)O            | C02561250 | -10.88 | -1.6  | -13.31 | 3.93  | 0.1   |
| 8046 | C[C@H]1CCCC(=O)O1            | C03860819 | -10.88 | -1.04 | -13.4  | 6.17  | -2.61 |
| 8047 | C1CCC(=CC1)C=O               | C04977523 | -10.88 | -1.15 | -13.36 | 4.62  | -0.99 |
| 8048 | C/C=C(\C)/C=N/NC             | C05371598 | -10.88 | -1.28 | -12.66 | 2.76  | 0.29  |
| 8049 | CCC(=S)N                     | C05501503 | -10.88 | -1.91 | -11.2  | 1.66  | 0.58  |
| 8050 | c1cc(ccc1C/C(=N/O)/N)N       | C06535467 | -10.88 | -2.12 | -17.19 | 5.5   | 2.93  |
| 8051 | c1cc(cc(c1)N)/C(=N/O)/N      | C12647933 | -10.88 | -0.53 | -16.28 | 5.25  | 0.68  |
| 8052 | c1cc2c(cc1F)n[nH]c2C=O       | C14983482 | -10.88 | 0.06  | -13.91 | 5.2   | -2.22 |
| 8053 | C[C@H](COC(F)F)O             | C16159289 | -10.88 | -2.17 | -11.96 | 2.84  | 0.41  |
| 8054 | c1c(sc(=S)[nH]1)O            | C17061538 | -10.88 | -5.34 | -15.37 | 9.64  | 0.18  |
| 8055 | C=C[C@H]1C(=C)CCC(=O)O1      | C21990748 | -10.88 | 0.05  | -12.44 | 5.34  | -3.83 |
| 8056 | Cc1nc(on1)CCCl               | C26515414 | -10.88 | 1.93  | -14.68 | 3.79  | -1.91 |
| 8057 | c1c(c(c(n1)Br)N)Cl           | C26894759 | -10.88 | 0.19  | -11.86 | 2.26  | -1.47 |
| 8058 | CS(=O)(=O)n1cncn1            | C32603711 | -10.88 | -0.38 | -20.09 | 10.36 | -0.76 |
| 8059 | CCc1ccc(c(c1)N)O             | C00125075 | -10.87 | -1.39 | -14.1  | 2.91  | 1.71  |
| 8060 | c1cncn(c1)C(=O)CBr           | C00158584 | -10.87 | 1.68  | -14.09 | 4.68  | -3.15 |
| 8061 | c1cc(c(cc1F)F)NC(=O)CC#N     | C00167765 | -10.87 | -4.66 | -14.29 | 11.32 | -3.24 |
| 8062 | COCOC(=O)C=C                 | C01608907 | -10.87 | 0.77  | -14.59 | 5.1   | -2.14 |
| 8063 | CCOC(=O)/C=C/CF              | C01614532 | -10.87 | -1.25 | -10.84 | 4.71  | -3.5  |
| 8064 | CC(C)C[N+](=O)[O-]           | C01666939 | -10.87 | -0.87 | -10.53 | 3.45  | -2.92 |
| 8065 | CC(=O)/C=C/C(=O)C            | C01718551 | -10.87 | 1.4   | -15.35 | 4.66  | -1.57 |
| 8066 | c1ccc(cc1)C=C([O-])[O-]O     | C01767981 | -10.87 | -2.85 | -13.83 | 6.11  | -0.3  |
| 8067 | COnc2ccccc2nn1               | C01865819 | -10.87 | 2.46  | -17.49 | 6.24  | -2.07 |
| 8068 | CNc1nnc(s1)[S-]              | C02171944 | -10.87 | -1.38 | -13.76 | 5.12  | -0.85 |
| 8069 | COc1ccc(c(c1)O)N             | C02510157 | -10.87 | -2.97 | -12.93 | 4.19  | 0.84  |
| 8070 | Cc1cnc(n1)C(F)F              | C02536621 | -10.87 | -4    | -9.79  | 5.21  | -2.29 |
| 8071 | C[C@@H]1C(=O)CCS1            | C05227198 | -10.87 | -0.85 | -10.42 | 3.1   | -2.7  |
| 8072 | CCNNC(=S)N                   | C05784958 | -10.87 | -0.04 | -16.03 | 2.76  | 2.45  |
| 8073 | C/(C=C)CC#N)C#N              | C08580903 | -10.87 | -1.08 | -16.06 | 9.56  | -3.28 |
| 8074 | Cc1[nH]c2c(n1)c(nnn2)N       | C08581302 | -10.87 | -5.05 | -13.84 | 8.08  | -0.07 |
| 8075 | Cc1c([nH]cn1)CCl             | C08614793 | -10.87 | -0.95 | -12.55 | 5.53  | -2.89 |
| 8076 | C[C@H](C(=O)Cl)NC(=O)C       | C11892560 | -10.87 | 0.68  | -15.2  | 4.63  | -0.99 |
| 8077 | CN/C(=N/O)/c1c(non1)N        | C13477019 | -10.87 | -0.09 | -19.05 | 7.36  | 0.92  |
| 8078 | Cc1c(c(n1)N)I                | C15021713 | -10.87 | -1.99 | -10.41 | 3.4   | -1.88 |
| 8079 | CCc1nc(cs1)CO                | C19092941 | -10.87 | -1.29 | -13.09 | 3.99  | -0.48 |
| 8080 | CC1(C[C@H]1C(=O)Cl)C         | C20357971 | -10.87 | 1.08  | -10.72 | 2.25  | -3.49 |
| 8081 | CCC(=O)[C@H](C#N)Cl          | C21982971 | -10.87 | -0.32 | -14.54 | 6.88  | -2.88 |
| 8082 | CCOC(=O)c1c(ccs1)N           | C26506189 | -10.87 | -1.07 | -13.08 | 5.7   | -2.43 |
| 8083 | c1c(nc2n1CCS2)C=O            | C29753875 | -10.87 | -3.52 | -12.92 | 8.22  | -2.65 |
| 8084 | Cc1ccccc1                    | M1995A019 | -10.87 | 0.18  | -7.96  | 1.51  | -4.6  |
| 8085 | c1cc(ccc1CO)C(F)(F)F         | C00166036 | -10.86 | -2.56 | -11.47 | 3.64  | -0.48 |
| 8086 | CCn1c(cc(n1)C)N              | C00167530 | -10.86 | -3.62 | -10.38 | 5.08  | -1.94 |
| 8087 | c1c(ncnc1Br)C(=O)ON          | C00481335 | -10.86 | -2.45 | -10.54 | 4.15  | -2.01 |
| 8088 | Cc1c(non1)COC(=O)C           | C00529501 | -10.86 | 0.85  | -17.13 | 7.55  | -2.14 |
| 8089 | C=CCCO                       | C01530356 | -10.86 | -3.03 | -9.83  | 1.96  | 0.04  |
| 8090 | CC(=O)Cc1ccc1                | C01583724 | -10.86 | -1.15 | -13.94 | 7.14  | -2.92 |
| 8091 | C(C(CCl)Cl)Cl                | C01667602 | -10.86 | 1.17  | -11.91 | 3.35  | -3.48 |
| 8092 | c1cc(ccc1C#N)N2N=N2          | C03845422 | -10.86 | -1.19 | -11.32 | 3.63  | -1.98 |
| 8093 | c1cc(c(c(c1)F)N)C(F)(F)F     | C04240283 | -10.86 | -1.93 | -9.62  | 2.37  | -1.68 |
| 8094 | C1C(C=NC=C1C#N)C#N           | C04390916 | -10.86 | -1.7  | -15.24 | 7.78  | -1.71 |
| 8095 | C[C@@H](CC#C)O               | C05226622 | -10.86 | -1.34 | -12.07 | 3.16  | -0.61 |
| 8096 | C[C@@H]1CC(=O)NN1            | C05758013 | -10.86 | -4.28 | -12.17 | 5.03  | 0.56  |

|      |                                          |           |        |       |        |       |       |
|------|------------------------------------------|-----------|--------|-------|--------|-------|-------|
| 8097 | c1cc(cnc1)CC(=O)N                        | C12359076 | -10.86 | -1.57 | -17.81 | 8.66  | -0.14 |
| 8098 | C(=NNC(=O)N)C=[N+](O)[O-]                | C13404426 | -10.86 | -2.9  | -17.55 | 8.44  | 1.15  |
| 8099 | C1C[C@H]([C@H](C1)Cl)O                   | C16137618 | -10.86 | -1.49 | -10.36 | 2.08  | -1.1  |
| 8100 | CSc1c(c[nH]c(=O)n1)F                     | C16952036 | -10.86 | -5.83 | -14.77 | 10.37 | -0.62 |
| 8101 | c1c(ccnc1N)CO                            | C21985268 | -10.86 | -2.13 | -17.64 | 7.21  | 1.7   |
| 8102 | CC(=O)C1=CC=C(C1)Br                      | C27840696 | -10.86 | -0.78 | -10.23 | 3.97  | -3.83 |
| 8103 | c1cc2c(cc1Cl)[nH]nc2N                    | C00154498 | -10.85 | -4.35 | -8.8   | 4.25  | -1.95 |
| 8104 | Cc1[nH]nc(n1)C                           | C01435792 | -10.85 | -2.1  | -14.26 | 7.63  | -2.12 |
| 8105 | CCCN=C=O                                 | C01575578 | -10.85 | -0.79 | -11.94 | 1.73  | 0.14  |
| 8106 | C[C@H](CC)OC(=O)C                        | C01627215 | -10.85 | -0.52 | -11.62 | 4.67  | -3.38 |
| 8107 | c1c2c([nH]c(=O)[nH]2)nc(n1)Cl            | C01691607 | -10.85 | -7.01 | -9.75  | 6.16  | -0.25 |
| 8108 | C[C@H]1C(=O)C=C(C1=O)[O-]                | C02037771 | -10.85 | -6.16 | -15.24 | 10.47 | 0.09  |
| 8109 | c1cc(c(c1)F)FCCO                         | C02386435 | -10.85 | -0.2  | -13.5  | 4.95  | -2.11 |
| 8110 | c1cc(cnc1)C(=O)c2ccco2                   | C02392765 | -10.85 | 0.35  | -13.88 | 6.09  | -3.4  |
| 8111 | CS/C(=NN)/NN                             | C04280916 | -10.85 | -4.73 | -11.21 | 4.53  | 0.56  |
| 8112 | c1ccc2c(c1)cc(s2)C#N                     | C06118051 | -10.85 | -0.6  | -12.89 | 4     | -1.36 |
| 8113 | C1COC(=CO)C=O                            | C06855242 | -10.85 | -1.94 | -16.13 | 8.67  | -1.46 |
| 8114 | COc1ccc(cn1)Cl                           | C08494087 | -10.85 | -1.61 | -10.53 | 2.51  | -1.22 |
| 8115 | c1cnnc2c1c(ncn2)[O-]                     | C09307071 | -10.85 | -3.69 | -18.09 | 12.21 | -1.29 |
| 8116 | c1cn(nc1N)CC(F)F                         | C12357564 | -10.85 | -1.09 | -14.96 | 6.94  | -1.73 |
| 8117 | CN(C)C(=O)c1cn[nH]c1N                    | C14608622 | -10.85 | -2.24 | -15.35 | 6.74  | 0     |
| 8118 | c1cc(ncn1N)[N+](=O)[O-]                  | C14982121 | -10.85 | -4.22 | -14.9  | 9.99  | -1.71 |
| 8119 | C=CCOCC=C                                | C15217376 | -10.85 | -0.56 | -9.75  | 2.1   | -2.64 |
| 8120 | CCn1cc(cn1)Br                            | C16124257 | -10.85 | 0.04  | -11.54 | 3.65  | -3    |
| 8121 | c1ccnc(c1)NC=C(C#N)C#N                   | C00136835 | -10.84 | -1.44 | -15.43 | 9.81  | -3.78 |
| 8122 | Cc1[nH]cc(n1)C(=S)N                      | C00164983 | -10.84 | -4.75 | -13.92 | 8.93  | -1.11 |
| 8123 | CCOC(=O)CC                               | C01697400 | -10.84 | -1.42 | -9.34  | 3.44  | -3.52 |
| 8124 | CC[C@H]([C@H]([C@H](C)[N+](=O)[O-])O-])O | C01759007 | -10.84 | -2.12 | -10.13 | 3.4   | -1.99 |
| 8125 | CN1C(=O)CNC1=S                           | C02537633 | -10.84 | -1.66 | -13.45 | 4.31  | -0.04 |
| 8126 | c1cc(c(cc1F)N)n2cnnc2                    | C02538780 | -10.84 | -2.19 | -9.3   | 4.9   | -4.25 |
| 8127 | c1c(cc(c1N)F)C#N                         | C02559543 | -10.84 | 0.05  | -12.66 | 3.86  | -2.1  |
| 8128 | C[C@H](C(=O)C(F)F)Br                     | C02560294 | -10.84 | 1.2   | -11.33 | 2.02  | -2.72 |
| 8129 | CC(=O)SCCC#N                             | C02584629 | -10.84 | -1.1  | -14.94 | 6.89  | -1.69 |
| 8130 | c1cc(=O)nc1[O-]CCO                       | C04353786 | -10.84 | -4.64 | -17.84 | 8.67  | 2.97  |
| 8131 | C/C=C/C#N                                | C05023934 | -10.84 | -1.51 | -11.91 | 4.6   | -2.02 |
| 8132 | C1COC(=O)[C@@H]1Cl                       | C05134260 | -10.84 | -0.54 | -13.43 | 5.58  | -2.45 |
| 8133 | CC(=O)CC(=O)OC                           | C05159232 | -10.84 | -5.34 | -12.31 | 7.82  | -1.02 |
| 8134 | c1c(c(n[nH]c1=O)[O-])Cl                  | C08614601 | -10.84 | -2.88 | -18.6  | 5.82  | 4.81  |
| 8135 | c1c(c[nH]c(=O)c1[N+](=O)[O-])O           | C08649837 | -10.84 | -1.28 | -18.44 | 6.92  | 1.96  |
| 8136 | C1CO[C@H]1CBr                            | C16083110 | -10.84 | 1.35  | -13.13 | 2.64  | -1.69 |
| 8137 | c1(nnc(c1)N)C(=O)NN                      | C16952808 | -10.84 | -5.17 | -17.92 | 6.26  | 6     |
| 8138 | C1(=O)C(=O)[C@@]2([C@]1(C2=O)O)O         | C16955511 | -10.84 | -2.31 | -17.63 | 5.16  | 3.95  |
| 8139 | c1c2c(ncn1)CNC2=O                        | C25923627 | -10.84 | -1.54 | -17.37 | 8.09  | -0.01 |
| 8140 | c1cc2nc(cn2cc1)FBr                       | C32911311 | -10.84 | -1.59 | -9.66  | 4.68  | -4.27 |
| 8141 | C[C@H](C(=O)C)O                          | C00895240 | -10.83 | -1.9  | -12.87 | 4.47  | -0.54 |
| 8142 | Cc1c[nH]c(=O)[nH]1                       | C00967419 | -10.83 | -2.67 | -15.6  | 7.35  | 0.1   |
| 8143 | CCOC(=O)NN                               | C01640794 | -10.83 | -3.05 | -13.71 | 4.89  | 1.04  |
| 8144 | CCCSCC=C                                 | C01644622 | -10.83 | 0.31  | -11.03 | 1.17  | -1.28 |
| 8145 | Cc1[nH]c2c(n1)ncn2                       | C01761937 | -10.83 | -3.08 | -15.72 | 9.95  | -1.98 |
| 8146 | CC[C@H](CC#C)O                           | C02032398 | -10.83 | -0.42 | -12.13 | 3.06  | -1.34 |
| 8147 | c1(c(c(c(c1)F)Br)F)F)N                   | C02167091 | -10.83 | 0.73  | -12.44 | 1.78  | -0.91 |
| 8148 | c1cc(nc(c1)F)C(=O)N                      | C02525420 | -10.83 | -3.13 | -13.51 | 5.51  | 0.31  |
| 8149 | C1CN(C(=O)N1N=O)N=O                      | C04887030 | -10.83 | 0.18  | -18.55 | 8.3   | -0.76 |
| 8150 | Cc1cc(c(s1)CO                            | C06857783 | -10.83 | -1.83 | -11.31 | 3.46  | -1.16 |
| 8151 | c1c(nc[nH]1)CC#N                         | C08100958 | -10.83 | -1.14 | -17.21 | 9.96  | -2.45 |
| 8152 | C/C(=C(C(=O)OC)NC                        | C15839430 | -10.83 | 2.37  | -14.74 | 3.91  | -2.37 |
| 8153 | Cn1nc(c1C(=N/O)N)N                       | C17044453 | -10.83 | -4    | -16.45 | 8.81  | 0.81  |
| 8154 | c1nc(nc1)NC2CC2                          | C18857994 | -10.83 | -1.12 | -10.16 | 4.18  | -3.73 |
| 8155 | c1cc2c(c[nH]c2nc1)CC#N                   | C21304030 | -10.83 | -4.75 | -13.1  | 10.69 | -3.66 |
| 8156 | CC[C@H](C(=O)OC)O                        | C00393219 | -10.82 | -0.59 | -13.87 | 3.87  | -0.23 |
| 8157 | c1(c(non1)N)c2nc(on2)N                   | C01066115 | -10.82 | -1.82 | -17.42 | 6.24  | 2.19  |
| 8158 | C1COC(O)CCO                              | C01651845 | -10.82 | -2.81 | -14.81 | 4.1   | 2.7   |
| 8159 | c1cc(ccc1N)NC(=O)N                       | C01683199 | -10.82 | -0.31 | -22.03 | 7.63  | 3.88  |
| 8160 | C1[C@H](OCO1)CCl                         | C02045101 | -10.82 | -0.6  | -12.27 | 3.21  | -1.16 |
| 8161 | CCCN1ccc(n1)C=O                          | C02538042 | -10.82 | -2.77 | -11.06 | 5.87  | -2.86 |
| 8162 | c1ccc(cc1)C(=C)C(=O)C(F)F/[O-]           | C04243029 | -10.82 | -3.54 | -9.07  | 4.51  | -2.72 |
| 8163 | COC1=CCOCC1                              | C04521391 | -10.82 | -0.7  | -12.74 | 2.61  | 0.01  |
| 8164 | c1c(c(cc1F)[N+](=O)[O-])F)N              | C04783291 | -10.82 | 1.56  | -18.11 | 6.49  | -0.76 |
| 8165 | C(CCl)ON                                 | C04887608 | -10.82 | -2.38 | -11.81 | 2.68  | 0.69  |
| 8166 | c1ccn(c(=O)c1)N                          | C05521768 | -10.82 | -1.79 | -17.27 | 9.33  | -1.09 |
| 8167 | c1ccnc(c1)C(=O)CC#N                      | C08729875 | -10.82 | -4    | -12.13 | 8.28  | -2.96 |
| 8168 | Cn1c(ccn1)C(F)F)N                        | C12357879 | -10.82 | -4.96 | -9.87  | 5.57  | -1.55 |
| 8169 | C=CCNc1ccc([nH+]1)N                      | C19961570 | -10.82 | -3.4  | -10.5  | 4.42  | -1.35 |
| 8170 | c1ccc(c1)[C@@H](C(F)(NH3+))F             | C20285900 | -10.82 | -2.43 | -9.24  | 3.23  | -2.38 |
| 8171 | CN(c1ccc(nn1)Cl)N                        | C00152907 | -10.81 | -2.24 | -12.3  | 5.38  | -1.64 |
| 8172 | CC(=O)Oc1ccc(cc1)Br                      | C01596299 | -10.81 | -0.63 | -13.45 | 4.81  | -1.53 |
| 8173 | C=CCOC(=O)N                              | C01664995 | -10.81 | -0.61 | -16.01 | 4.72  | 1.08  |
| 8174 | Cc1ccc(cc1)CCO                           | C01680826 | -10.81 | -1.56 | -10.28 | 3.47  | -2.44 |
| 8175 | CCOC(=O)c1ccnc(c1)F                      | C01682853 | -10.81 | 1.89  | -13.61 | 4.19  | -3.28 |
| 8176 | CCOC(=O)C#C                              | C01690295 | -10.81 | -1.13 | -12.75 | 5.77  | -2.7  |
| 8177 | CC(=O)c1cccc1O                           | C01699884 | -10.81 | -0.14 | -14.48 | 6.4   | -2.6  |
| 8178 | c1cc(sc1)C=C/CO                          | C01743779 | -10.81 | -1.84 | -14.48 | 4.04  | 1.47  |
| 8179 | COC(=O)c1ccc([nH]1)C=O                   | C01765334 | -10.81 | -0.1  | -16.06 | 7.38  | -2.04 |
| 8180 | CCCCC#CC=O                               | C01995132 | -10.81 | -0.71 | -12.86 | 4.88  | -2.11 |
| 8181 | c1cncc(c1Cl)C(F)F)F                      | C02578099 | -10.81 | -2.85 | -9.14  | 2.91  | -1.73 |
| 8182 | C=CN1CCCC1=O                             | C03590964 | -10.81 | -0.55 | -13.76 | 5.86  | -2.37 |
| 8183 | CNC(=S)N(C)N                             | C05187279 | -10.81 | -3.15 | -14.06 | 2.64  | 3.77  |
| 8184 | CNc1nc(nc1N)N                            | C13284856 | -10.81 | -5.46 | -10.55 | 5.13  | 0.06  |
| 8185 | c1cc2c(cc1F)[nH]c(n2)CO                  | C14987601 | -10.81 | -5.27 | -10.75 | 5.73  | -0.53 |
| 8186 | CCOC(=O)/C=C/C=C/C                       | C16893048 | -10.81 | -0.28 | -10.22 | 4.04  | -4.36 |

|      |                                      |           |        |       |        |       |       |
|------|--------------------------------------|-----------|--------|-------|--------|-------|-------|
| 8187 | C#CCN[C@H]1CCSC1                     | C19875381 | -10.81 | 0.06  | -11.39 | 3.18  | -2.65 |
| 8188 | C[C@@H]([C@@](C(F)(F)F)(O-))F        | C20232458 | -10.81 | -2.5  | -11.17 | 3.6   | -0.75 |
| 8189 | c1cnccc1C(=O)NN                      | C00001590 | -10.8  | -3.67 | -15.27 | 7.68  | 0.47  |
| 8190 | CCn1c(nnn1)N                         | C01462461 | -10.8  | -4.73 | -12.88 | 7.22  | -0.42 |
| 8191 | Cc1nc(nc(n1)N)N                      | C01555389 | -10.8  | -1.47 | -12.41 | 5.12  | -2.04 |
| 8192 | CC1=C[P@@](=O)(CC1)O                 | C01560250 | -10.8  | -2.5  | -14.91 | 6.77  | -0.15 |
| 8193 | CCCOCC(=O)C(F)F                      | C01713566 | -10.8  | -0.78 | -8.36  | 1.6   | -3.26 |
| 8194 | CCOC(=O)CF                           | C01720173 | -10.8  | -1    | -12.88 | 5.48  | -2.4  |
| 8195 | c1cc(c(c1)F)O)C=O                    | C02242717 | -10.8  | -1.18 | -13.64 | 5.1   | -1.08 |
| 8196 | C(=O)(C(F)F)Cl)N                     | C03880139 | -10.8  | -2.31 | -12.67 | 3.52  | 0.66  |
| 8197 | c1c[nH]c2c1cc(cn2)Br                 | C04352690 | -10.8  | -0.79 | -15.39 | 4.43  | 0.95  |
| 8198 | C(C(=O)CS)S                          | C05496914 | -10.8  | -1.77 | -12.56 | 4.07  | -0.54 |
| 8199 | CC(=O)c1ccnc1F                       | C08698255 | -10.8  | 0.64  | -19.16 | 10.09 | -2.36 |
| 8200 | CCC#COCC                             | C12418183 | -10.8  | 0.26  | -10.93 | 2.91  | -3.03 |
| 8201 | COCC(=O)c1ccsc1                      | C12959134 | -10.8  | 1.69  | -14.21 | 4.82  | -3.1  |
| 8202 | CCC[C@H]([C@H](C)C)O                 | C20231670 | -10.8  | -1.52 | -9.56  | 2.31  | -2.02 |
| 8203 | c1cc(c(cc1O)C#N)F                    | C32914668 | -10.8  | 1.27  | -17.54 | 6.96  | -1.49 |
| 8204 | c1cnc(nc1)NC=C(C#N)C#N               | C00093631 | -10.79 | -1.62 | -13.39 | 8.47  | -4.25 |
| 8205 | Cn1cccc1CC(=O)OC                     | C00156541 | -10.79 | 0.26  | -13.6  | 6.48  | -3.93 |
| 8206 | c1cc(c(cc1)F)CBr                     | C00161640 | -10.79 | -0.29 | -11.89 | 2.24  | -0.85 |
| 8207 | CCOC1CCCCC1O                         | C00404747 | -10.79 | -1.77 | -11.07 | 4.07  | -2.02 |
| 8208 | COCC(C(=O)OCC=C                      | C01599221 | -10.79 | 1.34  | -13.83 | 3.22  | -1.52 |
| 8209 | c1cn(ccc1=O)[O-]                     | C01731907 | -10.79 | -4.71 | -17.26 | 11.35 | -0.17 |
| 8210 | C1CCN(CC1)Cl                         | C02038843 | -10.79 | 0.81  | -10.48 | 1.27  | -2.39 |
| 8211 | c1cc(c(c1N)N)C(F)F                   | C02243181 | -10.79 | -2.99 | -9.76  | 2.97  | -1.02 |
| 8212 | COC(=O)c1c(c[nH]1)Br                 | C03832441 | -10.79 | 0.42  | -13.76 | 4.24  | -1.68 |
| 8213 | C1CC(=O)SC1                          | C04501380 | -10.79 | -0.6  | -13.26 | 5.16  | -2.09 |
| 8214 | CCOC(=O)O[C@H](C)Cl                  | C04521313 | -10.79 | -0.69 | -10.62 | 3.88  | -3.36 |
| 8215 | C[C@H]1CCCC(=O)O1                    | C04521558 | -10.79 | -0.5  | -12.65 | 5.43  | -3.07 |
| 8216 | C(CSC(=NH2+)N)ON                     | C04887234 | -10.79 | -0.41 | -15.69 | 3.75  | 1.57  |
| 8217 | C1C(=O)N(CS1)CCO                     | C05621429 | -10.79 | -1.67 | -16.65 | 4.91  | 2.62  |
| 8218 | c1ccc2c(c1)c(n[nH]2)I                | C14909873 | -10.79 | -3.72 | -8.16  | 4.22  | -3.14 |
| 8219 | c1cc2c(c1)F[nH]c2[O-]                | C14985619 | -10.79 | -3.36 | -13.2  | 4.72  | 1.05  |
| 8220 | C/C(=C)1/C(=O)C(=O)NC1=O/[O-]        | C18192858 | -10.79 | -4.06 | -13.47 | 5.05  | 1.68  |
| 8221 | C[C@@H]([C@H](C(=O)NCC(F)F)F)F[NH3+] | C19426015 | -10.79 | -2.51 | -13.19 | 4.21  | 0.7   |
| 8222 | c1cc(ccc1)OCC=O                      | C19729374 | -10.79 | 0.3   | -16.47 | 6.86  | -1.48 |
| 8223 | c1cc(nc1C)OCC#N                      | C19872670 | -10.79 | 0.79  | -14.23 | 4.63  | -0.98 |
| 8224 | CCOC(=O)[C@@H]1C[C@@H]1CO            | C21984003 | -10.79 | -2.22 | -12.43 | 5.13  | -1.27 |
| 8225 | Cc1c(ncn1)C)Br                       | C22001029 | -10.79 | -2.44 | -10.66 | 6     | -3.68 |
| 8226 | c1c(cnc(n1)Cl)C=O                    | C22113854 | -10.79 | 0.82  | -17.1  | 7.15  | -1.67 |
| 8227 | Cn1c(ccn1)I                          | C26340339 | -10.79 | -1.85 | -9.33  | 2.84  | -2.45 |
| 8228 | COC(=O)CNC(=O)c1cc[nH]n1             | C00045729 | -10.78 | -4.59 | -12.13 | 6.39  | -0.46 |
| 8229 | c1c(c(c(n1)Cl)N)Cl                   | C00967450 | -10.78 | -4.02 | -11.05 | 3.4   | 0.89  |
| 8230 | c1nc(c2c(n1)sn2)[O-]                 | C01416783 | -10.78 | -6.11 | -17    | 12.56 | -0.24 |
| 8231 | C=COCC=O                             | C01653065 | -10.78 | -0.56 | -13.06 | 4.94  | -2.1  |
| 8232 | C=C[C@H]([C1CCCC1)O                  | C01664511 | -10.78 | -1.46 | -9.39  | 2.64  | -2.57 |
| 8233 | c1c(oc1C)CCC(=O)Cl                   | C01769379 | -10.78 | -1.86 | -12.38 | 4.91  | -1.45 |
| 8234 | CCCCCOC=C                            | C02037287 | -10.78 | -0.2  | -10.41 | 1.56  | -1.72 |
| 8235 | c1csc(n1)NC(=O)C(=O)N                | C02361933 | -10.78 | 2.3   | -23.49 | 7.32  | 3.09  |
| 8236 | C[C@@H]([C@H](C(F)F)F)F)O            | C04269612 | -10.78 | -0.83 | -10.86 | 1.88  | -0.96 |
| 8237 | C[C@@H]1C[C@H]([C@H]1)O1             | C04501394 | -10.78 | 2.92  | -15.79 | 5.21  | -3.12 |
| 8238 | CC(S+)(C)C                           | C05339219 | -10.78 | 0.08  | -9.17  | 0.15  | -1.84 |
| 8239 | C(=O)NNC(=S)N                        | C05410159 | -10.78 | -5.39 | -15.78 | 7.15  | 3.24  |
| 8240 | CCO[C@@H]1CCC(=O)O1                  | C05765982 | -10.78 | -0.11 | -15.51 | 5.69  | -0.85 |
| 8241 | C[C@H]([C@H](CO)C=C                  | C06020791 | -10.78 | -1.2  | -11.92 | 1.83  | 0.5   |
| 8242 | c1ccc2c(cc1F)c(n[nH]2)N              | C06188243 | -10.78 | -1.71 | -12.02 | 4.64  | -1.69 |
| 8243 | C[C@H]([C@H](c1ccnc1)NO              | C06733579 | -10.78 | -2.3  | -12.32 | 3.77  | 0.07  |
| 8244 | C1CC(C1)/C(=N)O)N                    | C15937658 | -10.78 | -3.65 | -10.76 | 3.8   | -0.17 |
| 8245 | C1C(CO1)Br                           | C16083105 | -10.78 | -0.09 | -12.22 | 2.57  | -1.04 |
| 8246 | [C@@](C(F)F)Cl)(N=O)(F)Cl            | C16924550 | -10.78 | -1.18 | -11.12 | 2.37  | -0.85 |
| 8247 | CNC(=S)Nc1cccc1F                     | C17083483 | -10.78 | 0.36  | -15.48 | 7.91  | -3.57 |
| 8248 | C[C@H]1C(=O)NCCS1                    | C00405461 | -10.77 | -3.03 | -11.66 | 5.05  | -1.13 |
| 8249 | CC(=O)OC1CSC1                        | C01639980 | -10.77 | -0.97 | -13.79 | 4.8   | -0.8  |
| 8250 | c1ccc(c(c1)N)NC(=O)C(F)F             | C01680578 | -10.77 | -4.12 | -9.79  | 4.66  | -1.53 |
| 8251 | c1ccc(cc1)[P@@H]([O-])O              | C01996013 | -10.77 | -3.68 | -13.81 | 7.91  | -1.18 |
| 8252 | CNc1ccc(cc1)C#N                      | C02565984 | -10.77 | -0.91 | -11.67 | 4.45  | -2.63 |
| 8253 | c1cc(oc1C(F)F)C(F)F                  | C02566563 | -10.77 | -0.46 | -9.07  | 2.56  | -3.8  |
| 8254 | COC(=O)[C@H](C)Br                    | C03164544 | -10.77 | 1.15  | -12.68 | 3.61  | -2.85 |
| 8255 | [H]/N=C\1/CC(=NN2C1=NN2)N=[N+]=[N-]  | C04878745 | -10.77 | -4.33 | -12.68 | 4.56  | 1.68  |
| 8256 | CN(C)N=C/COC                         | C05081178 | -10.77 | -0.85 | -11.7  | 3.07  | -1.28 |
| 8257 | CC(C)[N+](=O)[O-]                    | C05167659 | -10.77 | -0.82 | -11.24 | 3.64  | -2.35 |
| 8258 | c1nc([nH]n1)NN                       | C05522092 | -10.77 | -5.21 | -16.26 | 5.78  | 4.92  |
| 8259 | c1c(c(n2c(n1)ncn2)[O-])C#N           | C06658038 | -10.77 | -5.86 | -19.4  | 18.13 | -3.64 |
| 8260 | c1cc(oc1)CNC(=O)CBr                  | C09877392 | -10.77 | -0.25 | -14.82 | 6.34  | -2.04 |
| 8261 | CCC(=O)/C(=N)O/C                     | C14649264 | -10.77 | -1.42 | -12.09 | 3.25  | -0.51 |
| 8262 | CO/C=C/COCO                          | C17196620 | -10.77 | -0.94 | -12.77 | 3.28  | -0.35 |
| 8263 | Cc1cc(=O)[nH]cn1                     | C18211990 | -10.77 | -5.42 | -13.08 | 9.21  | -1.49 |
| 8264 | CCn1ncc(n1)N                         | C19089911 | -10.77 | -2.1  | -12.33 | 4.68  | -1.01 |
| 8265 | c1ccc(c(c1)CC[NH2+])N)F              | C19168010 | -10.77 | 0.67  | -12.92 | 3.41  | -1.94 |
| 8266 | c1ccc(cc1)Cc2c[nH]nc2N               | C19730117 | -10.77 | -0.36 | -14.56 | 7.15  | -3    |
| 8267 | c1cc(c(cc1OCCO)F)F                   | C19786125 | -10.77 | -2.51 | -13.21 | 6.26  | -1.31 |
| 8268 | c1(c(c(c(c1F)N)F)F)N+=[O-][O-]N      | C19910277 | -10.77 | -2.83 | -12.82 | 5.87  | -0.98 |
| 8269 | C1COC[C@H]1/C=N/O                    | C20283008 | -10.77 | -3.59 | -12.82 | 4.92  | 0.72  |
| 8270 | c1nc(c(s1)C=O)C=O                    | C20357651 | -10.77 | -2.41 | -16.99 | 9.6   | -0.96 |
| 8271 | Cc1cc(c(nc1)N)O                      | C21981859 | -10.77 | -4.14 | -13.47 | 6.6   | 0.23  |
| 8272 | c1ccc(c(c1)CO)Cl                     | C00157459 | -10.76 | -1.67 | -10.07 | 2.74  | -1.76 |
| 8273 | c1c(csc1[N+](=O)[O-])C=O             | C00159715 | -10.76 | -4.64 | -9.18  | 6.04  | -3    |
| 8274 | CCOC(C)OCC                           | C00404268 | -10.76 | -0.32 | -10.58 | 2.43  | -2.3  |
| 8275 | Cn1c(cc(n1)O)C(F)F                   | C01046981 | -10.76 | -3.14 | -12.71 | 4.11  | 0.98  |
| 8276 | c1csc(n1)N[C@@H](C(F)F)F)O           | C01558268 | -10.76 | -3.11 | -12.11 | 4.02  | 0.44  |

|      |                                 |           |        |       |        |       |       |
|------|---------------------------------|-----------|--------|-------|--------|-------|-------|
| 8277 | COCc1ccccc1                     | C01574322 | -10.76 | -0.26 | -11.69 | 2.03  | -0.83 |
| 8278 | CCOC(=O)/C=C/C                  | C01680395 | -10.76 | -0.48 | -10.56 | 3.68  | -3.39 |
| 8279 | CCCCOC(=O)CF                    | C01847502 | -10.76 | 0.59  | -13.09 | 5.44  | -3.71 |
| 8280 | CC(=C)C(=O)OCC(C(F)F)(F)F       | C02579124 | -10.76 | 0.34  | -9.72  | 3.32  | -4.69 |
| 8281 | C1COC(OC1)CCCI                  | C05190715 | -10.76 | -0.01 | -14.01 | 2.75  | 0.5   |
| 8282 | CC[C@H](C#CC(F)F)F              | C05467588 | -10.76 | 0.03  | -11.62 | 2.3   | -1.46 |
| 8283 | c12=c(nn1)ssnc2S                | C06862762 | -10.76 | -0.42 | -13.24 | 3.9   | -1    |
| 8284 | C1CC1N=C=O                      | C11802355 | -10.76 | -0.82 | -11.77 | 1.96  | -0.12 |
| 8285 | COC(=O)C1Oc2ccccc2O1            | C14608629 | -10.76 | -0.87 | -12.79 | 6.5   | -3.59 |
| 8286 | c1cc2cc[nH]c2cc1I               | C14983495 | -10.76 | -0.02 | -10.9  | 3.41  | -3.25 |
| 8287 | C1C=CCC1C(=O)N                  | C15021095 | -10.76 | -2.26 | -13.05 | 5.2   | -0.65 |
| 8288 | C1=C([C@H](C(=O)N=C1)N)[NH3+]   | C15021943 | -10.76 | -3.6  | -18.09 | 9.12  | 1.81  |
| 8289 | C/C(=C/C(=O)OC)/N               | C15975165 | -10.76 | 0.77  | -15.36 | 4.93  | -1.09 |
| 8290 | C[C@H](Cc1ccccc1)O              | C20412681 | -10.76 | -4.19 | -9.18  | 3.8   | -1.19 |
| 8291 | CC(=O)c1ccc(c(c1)N)F            | C21985959 | -10.76 | -1.06 | -13.29 | 5.73  | -2.14 |
| 8292 | c1c(c(n1)CCC#N)Br               | C26547491 | -10.76 | -3.44 | -10.2  | 6.31  | -3.42 |
| 8293 | c1c(c(n[nH]1)N)C2CC2            | C26897708 | -10.76 | -5.27 | -10.56 | 6.4   | -1.33 |
| 8294 | Cn1ccnc1CC#N                    | C00331886 | -10.75 | -0.94 | -15.35 | 8.55  | -3    |
| 8295 | c1ccc(cc1)F)NNC(=S)N            | C01396307 | -10.75 | 0.23  | -17.04 | 8.94  | -2.87 |
| 8296 | c1ccc(cc1)C(=O)C=O              | C01634211 | -10.75 | -2.16 | -13.49 | 8.72  | -3.82 |
| 8297 | CC1OCCO1                        | C01680769 | -10.75 | -0.31 | -11.99 | 2.27  | -0.72 |
| 8298 | Cc1cccc(c1)NC                   | C01699966 | -10.75 | -0.13 | -9.82  | 2.16  | -2.96 |
| 8299 | CC#CC(=O)C                      | C01723675 | -10.75 | -1.38 | -12.72 | 5.11  | -1.76 |
| 8300 | C(C(C(=O)N)(F)F)(F)F            | C02149987 | -10.75 | -2.2  | -13.62 | 4.74  | 0.34  |
| 8301 | C/N=C/c1ccccc1F                 | C05829901 | -10.75 | -0.82 | -12.06 | 5.12  | -2.99 |
| 8302 | Cc1ccc(nc1)CCO                  | C08701027 | -10.75 | -2.25 | -11.26 | 3.9   | -1.14 |
| 8303 | c1cc(cnc1)[C@H]2[C@H](O2)C#N    | C13213076 | -10.75 | -1.57 | -13.79 | 6.57  | -1.97 |
| 8304 | C/C(=N/O)/c1ccccc1N             | C14417908 | -10.75 | -3.72 | -10.14 | 3.96  | -0.85 |
| 8305 | c1[nH]nc(n1)/N=C(N)/[NH+]=C(N)N | C16926091 | -10.75 | -5.95 | -20.54 | 19.1  | -3.37 |
| 8306 | CCc1nnc(o1)N                    | C16942992 | -10.75 | -2.11 | -14.85 | 3.47  | 2.74  |
| 8307 | c1cc(sc1)CNCC(F)F               | C19502962 | -10.75 | -1.2  | -10.31 | 3.48  | -2.73 |
| 8308 | CO[C@H]1CC=COC1                 | C20232049 | -10.75 | -0.82 | -10.55 | 2.02  | -1.4  |
| 8309 | c1cnc(cn1)NCC(F)F               | C21054921 | -10.75 | -2.53 | -11.38 | 4.76  | -1.6  |
| 8310 | Cc1ccc(s1)[C@@H](C)S            | C26515584 | -10.75 | -0.1  | -8.18  | 2.09  | -4.55 |
| 8311 | Cn1c(cnc1SC)C=O                 | C30678014 | -10.75 | -2.97 | -10.92 | 6.08  | -2.93 |
| 8312 | CCOc1ccc2nncn2n1                | C00108362 | -10.74 | -5.1  | -13.93 | 8.42  | -0.14 |
| 8313 | CC(=O)Nc1cccc(c1)F              | C00389744 | -10.74 | -1.96 | -14.48 | 8.41  | -2.72 |
| 8314 | C=CCN(CC=C)C#N                  | C00393616 | -10.74 | 1.29  | -10.21 | 3.79  | -5.62 |
| 8315 | CC[C@H]1CCC(=O)O1               | C00394775 | -10.74 | 0     | -13.23 | 5.65  | -3.16 |
| 8316 | c1cc(c(nc1)C=O)O                | C01494953 | -10.74 | -3    | -16.42 | 8.52  | 0.16  |
| 8317 | CCSCC(=O)C                      | C01657459 | -10.74 | -1.05 | -12.45 | 5.74  | -2.98 |
| 8318 | C(CC)SC(=NH2+)N                 | C01665216 | -10.74 | -2.05 | -13.45 | 2.65  | 2.1   |
| 8319 | C([C@H](C#N)Cl)Cl               | C01670676 | -10.74 | -1.07 | -10.62 | 3.72  | -2.78 |
| 8320 | CCOc1cccc(c1)O                  | C01680430 | -10.74 | -1.64 | -11.55 | 3.89  | -1.45 |
| 8321 | c1ccc(c(c1)NC(=O)N)O            | C01720564 | -10.74 | 0.17  | -21.75 | 7.07  | 3.77  |
| 8322 | c1cn[nH]c1C(=O)NN               | C04243758 | -10.74 | -4.94 | -18.21 | 7.26  | 5.15  |
| 8323 | CCO[P@@H](=O)[O-]               | C04529330 | -10.74 | -4.73 | -12.35 | 6.63  | -0.28 |
| 8324 | [H]/N=C/Cc1ccccc1)OCC           | C04776794 | -10.74 | -1.52 | -13.13 | 3.33  | 0.58  |
| 8325 | CC(C)Nn1cnc1                    | C05284733 | -10.74 | -1.39 | -14.88 | 6.04  | -0.52 |
| 8326 | C(CO)/C(=N)O/N                  | C06373467 | -10.74 | -5.51 | -13.39 | 4.45  | 3.7   |
| 8327 | c1cnc(c1)NNC(=S)N               | C13281580 | -10.74 | 0.71  | -19.72 | 10.64 | -2.37 |
| 8328 | c1cc2c(cc1F)C(=O)CO2            | C16083115 | -10.74 | -0.54 | -12.22 | 4.72  | -2.7  |
| 8329 | [H]/N=C(\CCC)/OCC               | C17014696 | -10.74 | -1.22 | -10.54 | 1.95  | -0.93 |
| 8330 | CCc1ccc(s1)C=O                  | C00152280 | -10.73 | -1.7  | -12.36 | 4.14  | -0.82 |
| 8331 | C1CCC(=O)C1                     | C00895304 | -10.73 | -0.57 | -11.07 | 3.27  | -2.37 |
| 8332 | CC(=C)C(=O)OCCOC                | C01608910 | -10.73 | 1.02  | -14.04 | 4.93  | -2.64 |
| 8333 | CCOCCC#N                        | C01688360 | -10.73 | -1.8  | -11.15 | 4.17  | -1.95 |
| 8334 | Cc1nnc(n1)C                     | C01742597 | -10.73 | -2.62 | -13.46 | 6.36  | -1.01 |
| 8335 | c1cc(c(cc1Cl)F)[N+](=O)[O-]     | C01845796 | -10.73 | -1.1  | -12.75 | 4.76  | -1.64 |
| 8336 | CC(=O)OCCCCI                    | C02031626 | -10.73 | -0.17 | -11.34 | 4.15  | -3.37 |
| 8337 | CCO[C@H](C(=O)OCC)O             | C02045745 | -10.73 | -3.48 | -10.4  | 4.54  | -1.4  |
| 8338 | c1c(c(n1CO)[N+](=O)[O-])Cl      | C04290898 | -10.73 | -5.16 | -12.57 | 7.41  | -0.42 |
| 8339 | CSC(=[N-])C(C(F)F)(F)F          | C04803484 | -10.73 | -2.07 | -8.37  | 2.24  | -2.53 |
| 8340 | C=CCOCO                         | C04976091 | -10.73 | -2.74 | -12.32 | 3.41  | 0.92  |
| 8341 | C1C[C@@H](OC=C1)C#N             | C05191294 | -10.73 | 1.59  | -15.17 | 4.4   | -1.55 |
| 8342 | CC(=O)NCC(=O)C=[N+]=[N-]        | C05278618 | -10.73 | -1.46 | -16.8  | 7.21  | 0.32  |
| 8343 | c1c(c(n[n-]1)C#N)[N+](=O)[O-]   | C05605780 | -10.73 | -2.9  | -13.55 | 6.16  | -0.44 |
| 8344 | c1c2c(sc1CO)CCC2                | C12336482 | -10.73 | -1.83 | -11.29 | 4.37  | -1.98 |
| 8345 | c1cncnc1NC=C(C#N)C#N            | C12495537 | -10.73 | -0.06 | -16.81 | 9.21  | -3.08 |
| 8346 | c1cc(oc1)[C@@H](C#N)N           | C19984404 | -10.73 | -1.01 | -14.66 | 5.5   | -0.55 |
| 8347 | CC(=O)c1c(ccc1)[O-]             | C32914750 | -10.73 | 1.77  | -19.72 | 8.9   | -1.68 |
| 8348 | Cc1cc(nnc1Cl)[O-]               | C00337144 | -10.72 | -2.83 | -13.91 | 4.71  | 1.31  |
| 8349 | CC(=O)Nc1ccccc1O                | C00404269 | -10.72 | -1.12 | -15.42 | 6.49  | -0.67 |
| 8350 | C1C=C(C[C@H]2[C@H]1O2)Cl        | C01678543 | -10.72 | 0.59  | -14.72 | 2.52  | 0.9   |
| 8351 | Cc1c([nH]nc1C)C                 | C02168425 | -10.72 | -1.65 | -11.17 | 4.24  | -2.14 |
| 8352 | c1ccc(cc1)C[C@@H]2CO2           | C02545314 | -10.72 | 0.88  | -12.12 | 3.74  | -3.23 |
| 8353 | c1ccc(c(c1)/C=C/C(=O)N)F        | C02783413 | -10.72 | 0.32  | -20.68 | 9.06  | 0.59  |
| 8354 | C1CN(C(=O)NC1=O)N=O             | C04917965 | -10.72 | -0.65 | -17.38 | 7.38  | -0.07 |
| 8355 | CCC(CC)S                        | C05298733 | -10.72 | -0.58 | -9.98  | 0.57  | -0.73 |
| 8356 | C[C@H]1C(=O)NC(=S)N1            | C05751800 | -10.72 | -3.74 | -13.67 | 3.67  | 3.02  |
| 8357 | c1cc(=O)[nH]cc1[O-]             | C13527001 | -10.72 | -2.57 | -16.37 | 5.11  | 3.11  |
| 8358 | C1C(=O)N=C(N)N                  | C13536079 | -10.72 | -1.62 | -15.72 | 6.34  | 0.28  |
| 8359 | Cc1ccccc1/C=C/O                 | C13541520 | -10.72 | -2.91 | -9.1   | 5.81  | -4.52 |
| 8360 | Cc1c(onc1[O-])C                 | C16974812 | -10.72 | -2.35 | -15.04 | 7.74  | -1.07 |
| 8361 | CCN(CC)/C(=N)O/N                | C17064135 | -10.72 | -4.42 | -10.81 | 6.08  | -1.57 |
| 8362 | Cc1c(sc(n1)Br)C                 | C19702750 | -10.72 | -0.36 | -10.86 | 3.38  | -2.88 |
| 8363 | CCNc1ccc(cn1)Br                 | C20552434 | -10.72 | -4.34 | -6.16  | 2.65  | -2.88 |
| 8364 | c1ccc(c(c1)N)n2ccn2             | C22141362 | -10.72 | -2.2  | -12.67 | 6.18  | -2.03 |
| 8365 | c1cc(c(cc1NC(=O)N)N)F           | C22144609 | -10.72 | -4.42 | -17.77 | 10.34 | 1.13  |
| 8366 | c1cnc(n2c1nnc2)NN               | C26894645 | -10.72 | -2.09 | -12.81 | 7.23  | -3.06 |

|      |                                |           |        |       |        |       |       |
|------|--------------------------------|-----------|--------|-------|--------|-------|-------|
| 8367 | Cc1nncn1C                      | C32628130 | -10.72 | -1.96 | -14.08 | 8.49  | -3.17 |
| 8368 | CNC(=S)Nc1ccccc1               | C00075391 | -10.71 | 0.8   | -17.2  | 9.18  | -3.49 |
| 8369 | Cc1cc(=O)[nH]c(=O)[nH]1        | C00162484 | -10.71 | -2.98 | -16.87 | 8.54  | 0.6   |
| 8370 | c1ccc2c(c1)nc(o2)Cl            | C00404788 | -10.71 | -0.13 | -15.82 | 4.49  | 0.75  |
| 8371 | CC(=O)SCCCCl                   | C01635551 | -10.71 | -0.52 | -9.75  | 3.1   | -3.53 |
| 8372 | c1ccoc(c1)Br                   | C02572476 | -10.71 | -1.98 | -11.09 | 2.53  | -0.17 |
| 8373 | CCCCCS                         | C03861659 | -10.71 | -0.47 | -10.4  | 0.72  | -0.57 |
| 8374 | Cn1cc(c(n1)[N+](=O)[O-])N      | C04014784 | -10.71 | -2.79 | -17.34 | 9.39  | 0.03  |
| 8375 | CSC1=NCCCC1                    | C04963521 | -10.71 | 0.72  | -10.5  | 1.46  | -2.39 |
| 8376 | c1cc(=O)[nH]nc1                | C08672864 | -10.71 | -2.38 | -15.84 | 7.59  | -0.07 |
| 8377 | c1c(csc1)CnN]Br                | C20475276 | -10.71 | -0.26 | -11.18 | 1.9   | -1.17 |
| 8378 | c1c(con1)CO                    | C26547904 | -10.71 | -2.04 | -15.28 | 6.08  | 0.52  |
| 8379 | C=CS(=O)(=O)c1ccccc1           | C00391881 | -10.7  | 1.25  | -16.45 | 6.67  | -2.17 |
| 8380 | CNC(=O)c1ccc(cc1)F             | C00398480 | -10.7  | -2.11 | -14.7  | 6.2   | -0.1  |
| 8381 | CC(=O)c1ccc([nH]1)[N+](=O)[O-] | C01561732 | -10.7  | -3.21 | -11.86 | 7.74  | -3.37 |
| 8382 | CCCC(=O)C(C(F)(F)F)(F)F        | C01675533 | -10.7  | -0.73 | -8.53  | 2.28  | -3.72 |
| 8383 | COCCCC=O                       | C01678736 | -10.7  | -2.04 | -11.65 | 4.49  | -1.5  |
| 8384 | C1=CC(=O)N(C1=O)O              | C02141013 | -10.7  | -3.41 | -16.55 | 8.58  | 0.67  |
| 8385 | CC(=O)CNC(=O)C                 | C02528183 | -10.7  | -1.49 | -15.63 | 6     | 0.43  |
| 8386 | CCOC(=O)C(=N+)[N-](C(F)(F)F)   | C04255747 | -10.7  | 0.21  | -11.47 | 2.53  | -1.96 |
| 8387 | CC[C@H](CS)S                   | C05298876 | -10.7  | -0.7  | -11.55 | 1.46  | 0.09  |
| 8388 | C[C@H]1CC[C@H](C1)O            | C05752028 | -10.7  | -0.48 | -10.91 | 1.73  | -1.04 |
| 8389 | Cc1ccc(n1)N                    | C06071275 | -10.7  | -2.63 | -12.29 | 3.04  | 1.19  |
| 8390 | c1cc2c(c(c1)F)c([nH]2)Cl       | C14985898 | -10.7  | -0.37 | -12.69 | 5.13  | -2.77 |
| 8391 | c1cc(cc(c1)O)C(F)F             | C15441916 | -10.7  | -0.99 | -12.7  | 4.93  | -1.94 |
| 8392 | CO/C=N/c1cn2c(n1)CN=C2         | C17142940 | -10.7  | -0.05 | -18.08 | 8.9   | -1.47 |
| 8393 | CC(=O)Cn1ccnc1                 | C19092247 | -10.7  | -2.28 | -14.64 | 9.8   | -3.57 |
| 8394 | c1[nH]nc(n1)n2nncn2            | C19770068 | -10.7  | -5.5  | -15.57 | 13.56 | -3.2  |
| 8395 | c1cc(c(cc1F)F)N=C=S            | C00164717 | -10.69 | -0.26 | -11.48 | 2.32  | -1.27 |
| 8396 | CSc1ccccc1N                    | C00388267 | -10.69 | -0.14 | -10.94 | 2.95  | -2.56 |
| 8397 | Cc1c([nH]1)[O-]C(=O)NN         | C01082446 | -10.69 | -3.14 | -15.87 | 8.26  | 0.05  |
| 8398 | #CC1OCCCCO1                    | C01590523 | -10.69 | 0.63  | -14.01 | 4.56  | -1.87 |
| 8399 | C[C@H](CSC)O                   | C01682807 | -10.69 | -1.27 | -11.54 | 2.87  | -0.75 |
| 8400 | c1ccc2c(c1)CCOC2               | C01691582 | -10.69 | -0.89 | -9.01  | 2.59  | -3.38 |
| 8401 | CC(C)SC=O                      | C01743177 | -10.69 | -0.18 | -12.58 | 4.24  | -2.17 |
| 8402 | CC[C@H](N+)(=O)[O-]Cl          | C01758983 | -10.69 | -0.68 | -11.81 | 2.72  | -0.93 |
| 8403 | c1ccc(cc1)[C@H](CBr)O          | C01995624 | -10.69 | -0.76 | -10.03 | 2.87  | -2.78 |
| 8404 | CC[C@H](C)CCO                  | C02034637 | -10.69 | -2.73 | -8.77  | 1.79  | -0.98 |
| 8405 | CC(=O)OCCC#C                   | C02382826 | -10.69 | -0.02 | -12.22 | 4.91  | -3.36 |
| 8406 | COCCOCC                        | C02563430 | -10.69 | -0.7  | -11.86 | 2.92  | -1.05 |
| 8407 | C1CS(=O)(=O)C=C1SC(=NH2+)N     | C05034100 | -10.69 | -1.08 | -20.36 | 9.5   | 1.25  |
| 8408 | CCCCN(C(=O)C)N=O               | C05049224 | -10.69 | -1.13 | -10.41 | 2.81  | -1.97 |
| 8409 | Cc1[nH]c(cn1)[C@H](C(F)(F)F)O  | C05285760 | -10.69 | -4.29 | -12.78 | 6.93  | -0.55 |
| 8410 | C/C=N/NCCC#N                   | C05496996 | -10.69 | -2.96 | -12.44 | 6.35  | -1.65 |
| 8411 | COC(=O)CSc1cccs1               | C05510951 | -10.69 | -1.18 | -13.08 | 4.53  | -0.96 |
| 8412 | Cn1c(cnc1)[N+](=O)[O-]CO       | C13207527 | -10.69 | -3.81 | -13.72 | 9.2   | -2.36 |
| 8413 | CCOC(=O)n1ccnc1                | C13284754 | -10.69 | -0.31 | -11.62 | 4.56  | -3.32 |
| 8414 | c1cc(ncc1[O-])[N+](=O)[O-]     | C14982964 | -10.69 | -2.26 | -15.41 | 8.16  | -1.19 |
| 8415 | CN(C(=O)c1ccco1)O              | C15780037 | -10.69 | -3.63 | -13.47 | 7.33  | -0.92 |
| 8416 | C(=O)([C@](C(F)(F)F)(F)Cl)F    | C16159147 | -10.69 | -0.31 | -9.1   | 0.96  | -2.24 |
| 8417 | C1[C@H](C=C[C@H]2[C@H]1O2)O    | C17000693 | -10.69 | -2.11 | -13.58 | 4.26  | 0.74  |
| 8418 | c1c(c(nc1)N)[O-]N=O            | C17021588 | -10.69 | -5.45 | -13.64 | 5.69  | 2.71  |
| 8419 | c1c(c[nH]c1=O)N                | C17426312 | -10.69 | -4.33 | -17.25 | 7.28  | 3.62  |
| 8420 | C1CC(=CC(=O)C1)N               | C18200963 | -10.69 | -4.76 | -15.7  | 10.96 | -1.18 |
| 8421 | CC[NH2+]NCC                    | C19168139 | -10.69 | -0.3  | -11.27 | 1.51  | -0.63 |
| 8422 | c1nncn1NC(=NH2+)N=C(N)N        | C20458929 | -10.69 | -5.93 | -13.69 | 12.89 | -3.96 |
| 8423 | c1cnc(nc1C=O)N                 | C26895888 | -10.69 | -4.91 | -14.51 | 10.07 | -1.34 |
| 8424 | C1[C@H](COC1)Br                | C29865995 | -10.69 | 0.14  | -9.78  | 1.14  | -2.2  |
| 8425 | CSc1nc(c(s1)C#N)N              | C00039461 | -10.68 | -2.55 | -11.94 | 5.18  | -1.36 |
| 8426 | C1Cn2c(nnn2)NC1=O              | C01427446 | -10.68 | 0.26  | -18.4  | 7.46  | 0     |
| 8427 | Cc1ccc(n1)C                    | C01574315 | -10.68 | -0.73 | -9.43  | 3.25  | -3.77 |
| 8428 | CC(=CCc1ccc(cc1)O)C            | C01600126 | -10.68 | -0.28 | -12.88 | 2.8   | -0.32 |
| 8429 | C(CSC(=O)N)CCl                 | C01755559 | -10.68 | -1.18 | -13.26 | 4.36  | -0.6  |
| 8430 | c1ccc2c(c1)CC(C2)O             | C01758758 | -10.68 | -1.1  | -10.31 | 2.95  | -2.22 |
| 8431 | CC(=O)[C@H](OC)F               | C01765112 | -10.68 | -0.8  | -12.9  | 4.46  | -1.44 |
| 8432 | c1csc1C(=O)NN                  | C02574348 | -10.68 | -3.04 | -15.1  | 7.65  | -0.2  |
| 8433 | C[C@H]1[C@H](CCO1)S            | C04262497 | -10.68 | 0.36  | -11.21 | 1.97  | -1.8  |
| 8434 | CNC=C/1CCOC1=O                 | C04771842 | -10.68 | -1.93 | -13.8  | 7.02  | -1.97 |
| 8435 | CC(=O)Cc1ccccc1                | C08294932 | -10.68 | -1.38 | -13.61 | 7.51  | -3.19 |
| 8436 | c1ccc(n1)N                     | C12336599 | -10.68 | -3.58 | -13.57 | 4.5   | 1.97  |
| 8437 | c1c([nH]c(=O)c(c1)N)Br         | C14982016 | -10.68 | -2.93 | -14.87 | 4.93  | 2.19  |
| 8438 | C[C@H]1[C@H](C@H)1N=C=O        | C19518769 | -10.68 | -1.4  | -10.76 | 2.18  | -0.7  |
| 8439 | CSc1ccc(cc1)Br                 | C00167168 | -10.67 | -0.05 | -12.47 | 1.88  | -0.03 |
| 8440 | c1cc(nc(c1)Cl)Cl               | C00331613 | -10.67 | -1.75 | -10.26 | 4.11  | -2.77 |
| 8441 | c1c(nc2[nH]ncn2c1=O)N          | C01613014 | -10.67 | -3.75 | -16.01 | 7.3   | 1.78  |
| 8442 | CC(=O)CCO                      | C01672523 | -10.67 | -2.71 | -12.42 | 4.14  | 0.31  |
| 8443 | C=CCOC=O                       | C01680373 | -10.67 | -0.76 | -14.22 | 6.44  | -2.14 |
| 8444 | CC(=O)CCC(=O)C                 | C01683671 | -10.67 | -1.11 | -11.72 | 4.69  | -2.54 |
| 8445 | c1c([nH](ccc1S)[O-])           | C01714990 | -10.67 | -1.78 | -17.68 | 11.1  | -2.31 |
| 8446 | C(C#N)N(CC#N)[N+](=O)[O-]      | C01724608 | -10.67 | -4.3  | -16.51 | 12.49 | -2.35 |
| 8447 | CCCC/C=C/C=O                   | C02017189 | -10.67 | -0.71 | -12.87 | 4.62  | -1.71 |
| 8448 | c1ccc(c(c1)C)F)N=C=O           | C02509912 | -10.67 | -3.66 | -9.74  | 3.98  | -1.25 |
| 8449 | c1ccnc(c1)Cn2c(ccn2)N          | C03445805 | -10.67 | 0.3   | -17.04 | 8.55  | -2.47 |
| 8450 | Cc1cc(no1)NC(=O)C(=O)N         | C04323353 | -10.67 | -1.74 | -16.78 | 6.24  | 1.61  |
| 8451 | CCC(=S)[O-]                    | C04775268 | -10.67 | -0.68 | -12.28 | 2.66  | -0.38 |
| 8452 | CCNc1nnc(s1)[S-]               | C05303815 | -10.67 | -4.21 | -10.88 | 6.14  | -1.72 |
| 8453 | C=C[P@@H](=O)[O-]              | C06665106 | -10.67 | -4.32 | -12.05 | 6.29  | -0.59 |
| 8454 | c1cc(c(cc1CCO)F)Cl             | C15441145 | -10.67 | -2.58 | -9.17  | 3.45  | -2.37 |
| 8455 | CSc1nnc(=O)n1N                 | C16248851 | -10.67 | -3.83 | -11.44 | 5.12  | -0.52 |
| 8456 | Cc1nc([nH]n1)CC#N              | C16249007 | -10.67 | -1.12 | -17.17 | 9.72  | -2.09 |

|      |                                  |           |        |       |        |       |       |
|------|----------------------------------|-----------|--------|-------|--------|-------|-------|
| 8457 | c1cc(sc1)CC[NH2+]                | C19265147 | -10.67 | -0.95 | -12.03 | 3.47  | -1.16 |
| 8458 | C[C@@H]1C[C@H]1N=C=O             | C19518771 | -10.67 | 0.72  | -12.49 | 1.87  | -0.77 |
| 8459 | CN/C=C/[N+](=O)[O-]/SC           | C19594774 | -10.67 | -0.85 | -12.21 | 5.24  | -2.86 |
| 8460 | CCOC(=O)[C@H](C#N)N              | C20064543 | -10.67 | -0.34 | -15.49 | 5.66  | -0.5  |
| 8461 | Cc1c(c(n1)C)N)Cl                 | C20313735 | -10.67 | -5.51 | -9.08  | 5.64  | -1.72 |
| 8462 | CCOCc1cc(on1)N                   | C26512604 | -10.67 | -1.07 | -16.61 | 5.99  | 1.01  |
| 8463 | CC(=O)c1ccc(cc1F)F               | C00157303 | -10.66 | 1.25  | -16.87 | 7.21  | -2.26 |
| 8464 | C1CCO[C@H](C1)ON                 | C00403241 | -10.66 | -1.84 | -11.86 | 3.75  | -0.7  |
| 8465 | Cc1c(ccn1)C=O                    | C02384488 | -10.66 | -2.85 | -11.86 | 6.22  | -2.18 |
| 8466 | CC(=C)C#CCO                      | C02390306 | -10.66 | -2.75 | -11.74 | 4.79  | -0.96 |
| 8467 | c1cc(ccc1CN=C=O)Cl               | C02526521 | -10.66 | -2.25 | -11.86 | 3.22  | 0.23  |
| 8468 | CCSc1nnc(n1N)C(F)F               | C02536951 | -10.66 | -2.03 | -9.95  | 4.55  | -3.22 |
| 8469 | C(CC(F)F)Br)CO                   | C02555156 | -10.66 | -1.72 | -11.4  | 3.29  | -0.83 |
| 8470 | C[C@H](c1ccc(cc1)O)O             | C02566074 | -10.66 | -2.01 | -12.5  | 3.74  | 0.11  |
| 8471 | c1cc(ccc1C#N)SC(F)F              | C02579163 | -10.66 | -1.34 | -7.95  | 3.48  | -4.85 |
| 8472 | C1=CC(=O)C[C@H]1O                | C04521580 | -10.66 | -4.17 | -14.16 | 7.67  | 0     |
| 8473 | c1(c(c(c1F)Br)F)F)O              | C04644817 | -10.66 | 0.77  | -12.76 | 2.29  | -0.96 |
| 8474 | C/C(=C/C(=O)C(F)F)/OC            | C04801703 | -10.66 | -2.3  | -8.92  | 2.93  | -2.37 |
| 8475 | CC(C)CS                          | C05008005 | -10.66 | -0.49 | -8.13  | 0.68  | -2.71 |
| 8476 | CCc1nc(no1)C(=N)O/N              | C05019001 | -10.66 | -2.03 | -17.06 | 6.42  | 2.02  |
| 8477 | CN(C)C(=S)NN                     | C06371802 | -10.66 | -2.04 | -13.24 | 2.46  | 2.17  |
| 8478 | C/C=C/O)N                        | C08603167 | -10.66 | -2.14 | -13.76 | 4.85  | 0.39  |
| 8479 | Cc1cc(nnc1)Cl                    | C15444618 | -10.66 | -2.1  | -11.58 | 5.12  | -2.1  |
| 8480 | CCSc1ccccc1N                     | C16576888 | -10.66 | -0.22 | -9.55  | 2.47  | -3.36 |
| 8481 | C[C@H]1C=CC[C@H]2[C@@H]1COC2     | C17355228 | -10.66 | -0.38 | -8.37  | 1.43  | -3.34 |
| 8482 | Cc1ccnc1C(F)F                    | C21985789 | -10.66 | -2.68 | -9.17  | 4.52  | -3.33 |
| 8483 | c1cnnc1c2cccn2                   | C22002470 | -10.66 | -0.83 | -14.36 | 6.77  | -2.23 |
| 8484 | C1CCc2c(c(no2)C#N)C1             | C24774066 | -10.66 | 2.16  | -13.44 | 4.28  | -3.66 |
| 8485 | c1cc(sc1)CC(=O)N                 | C00347395 | -10.65 | -3.74 | -13.73 | 7.48  | -0.67 |
| 8486 | CCOCC                            | C01657408 | -10.65 | -0.1  | -10.46 | 1.46  | -1.54 |
| 8487 | CC(=O)COC                        | C01688094 | -10.65 | -1.4  | -13.07 | 5.38  | -1.57 |
| 8488 | CC(=C)CNC(=O)C                   | C01697869 | -10.65 | 1.06  | -15.53 | 5.31  | -1.49 |
| 8489 | CCOC(=O)C(C=O)C(F)F              | C02556469 | -10.65 | 0.73  | -12.52 | 4.12  | -2.98 |
| 8490 | C[C@@H](c1ccccc1)NC=O            | C04018178 | -10.65 | -1.35 | -15.14 | 6.09  | -2.25 |
| 8491 | COc1ccc(=O)[nH]n1                | C05115746 | -10.65 | -3.65 | -14.94 | 5.64  | 2.3   |
| 8492 | Cc1c[nH]c(=S)[nH]c1=O            | C08602963 | -10.65 | -4.01 | -13.09 | 5.4   | 1.05  |
| 8493 | CN(C)C=C[N+](=O)[O-]             | C12370856 | -10.65 | -2.4  | -15.04 | 9.48  | -2.7  |
| 8494 | Cc1c(cn1)CC(F)F)C=O              | C12395188 | -10.65 | -5.64 | -9     | 6.96  | -2.96 |
| 8495 | Cc1cccc(n1)CCl                   | C15884435 | -10.65 | -0.28 | -10.62 | 3.77  | -3.51 |
| 8496 | COC(=O)[C@@H](CS)N               | C19230197 | -10.65 | -0.92 | -12.7  | 3.23  | -0.27 |
| 8497 | C1Cc2c(sc2)CC#N)C1               | C19422427 | -10.65 | -1.79 | -13.02 | 8.03  | -3.88 |
| 8498 | COC(=O)Nc1ccc(cc1)Cl             | C00270902 | -10.64 | -0.34 | -15.25 | 4.91  | 0.04  |
| 8499 | c1cc(c(c1)Cl)Cl)O                | C00388511 | -10.64 | -2.14 | -10.12 | 3.58  | -1.96 |
| 8500 | c1cc(ccc1)O)Cl                   | C00388513 | -10.64 | -1.75 | -9.92  | 2.89  | -1.86 |
| 8501 | C=CCNc1ccnc(n1)N                 | C01644920 | -10.64 | -4.11 | -13.06 | 4.41  | 2.12  |
| 8502 | CCOC(=O)CON                      | C01683162 | -10.64 | -1.63 | -13.7  | 5.52  | -0.84 |
| 8503 | CC[C@H]1C[C@H](C#C)O             | C02044152 | -10.64 | -0.49 | -11.62 | 2.21  | -0.74 |
| 8504 | c1c(c(cc1)Br)Br                  | C02245234 | -10.64 | -0.08 | -12.77 | 2.59  | -0.37 |
| 8505 | CC(=O)N(C)OC                     | C02528020 | -10.64 | -1.04 | -12.97 | 4.55  | -1.18 |
| 8506 | Cc1c(cnn1)C#N                    | C02537522 | -10.64 | 0.37  | -14.66 | 6     | -2.35 |
| 8507 | c1c(cnc(=O)[nH]1)Br              | C04002614 | -10.64 | -2.42 | -17.98 | 9.5   | 0.25  |
| 8508 | CNC(=O)c1ccc1                    | C04099604 | -10.64 | -1.13 | -14.64 | 5.97  | -0.85 |
| 8509 | COc1ncc(n1)Cl                    | C04228197 | -10.64 | -1.53 | -12.8  | 3.69  | 0     |
| 8510 | COCCn1cc(cn1)N                   | C11920295 | -10.64 | -1.61 | -13.03 | 4.11  | -0.12 |
| 8511 | c1cc(cnc1)CCCO                   | C15884434 | -10.64 | -1.81 | -12.69 | 4.8   | -0.94 |
| 8512 | C1=C(C(=[N+]=[N-])N=N)1)C(=O)N   | C17419165 | -10.64 | -2.89 | -16.9  | 7.15  | 2     |
| 8513 | C1CCC(C1)CCN=C=S                 | C19090030 | -10.64 | 0.9   | -8.66  | 1.09  | -3.97 |
| 8514 | Cc1ccc(c(n1)N)C(=O)N             | C20272877 | -10.64 | -3.15 | -16.5  | 8.09  | 0.93  |
| 8515 | c1ccc(c(c1)CC(=O)NN)F            | C22166985 | -10.64 | -5.98 | -13.05 | 9.83  | -1.43 |
| 8516 | c1ccc2c(c1)[nH]c(n2)Br           | C00158652 | -10.63 | -2.62 | -14.23 | 4.91  | 1.3   |
| 8517 | c1nc2c(c(n1)scn2)N               | C00337087 | -10.63 | -1.28 | -15.14 | 6.39  | -0.59 |
| 8518 | COc1cccc(n1)N                    | C00404286 | -10.63 | -0.02 | -15.31 | 4.15  | 0.56  |
| 8519 | Cc1cc(=O)oc(=O)[nH]1             | C00532355 | -10.63 | -2.93 | -16.39 | 9.98  | -1.29 |
| 8520 | c1cnc(nc1N)C(F)F                 | C01685214 | -10.63 | -5.07 | -10.03 | 5.71  | -1.24 |
| 8521 | c1ccc(cc1)Cn2ccnn2               | C01756184 | -10.63 | 0.69  | -17.58 | 7.74  | -1.48 |
| 8522 | C[C@@H]1C[C@H]1C(=O)Cl           | C01766066 | -10.63 | -0.9  | -11.34 | 2.35  | -0.75 |
| 8523 | Cc1ncc(s1)OC                     | C01850481 | -10.63 | 0.99  | -14.05 | 3.87  | -1.45 |
| 8524 | CCOC(=O)C(=C)C#N                 | C02507893 | -10.63 | 0.3   | -14.14 | 6.28  | -3.07 |
| 8525 | c1cc(c(nc1)Cl)C(F)F              | C02584285 | -10.63 | -2.55 | -10.99 | 4.56  | -1.65 |
| 8526 | CC(=O)NBr                        | C03874381 | -10.63 | -2.11 | -13.25 | 5.04  | -0.31 |
| 8527 | c1c(cc(c2c1CCO2)F)F              | C04255033 | -10.63 | -2.25 | -8.78  | 3.77  | -3.37 |
| 8528 | C(C(O)F)F(C(F)F)F                | C04266097 | -10.63 | -4.94 | -7.34  | 1.96  | -0.31 |
| 8529 | C1COC(=O)[C@H]1N=C=S             | C04266338 | -10.63 | -0.21 | -14.72 | 6.34  | -2.04 |
| 8530 | Cc1nnc(s1)N[N+](=O)[O-]          | C04476324 | -10.63 | -5.06 | -11.34 | 7.85  | -2.08 |
| 8531 | C(CS)CO                          | C04501370 | -10.63 | -3.56 | -11.06 | 2.26  | 1.74  |
| 8532 | C1C[C@@H](OC=C1)C=O              | C04529089 | -10.63 | 0.31  | -15.81 | 6.21  | -1.35 |
| 8533 | CC1=CC[C@H](CC1)C=O              | C04811480 | -10.63 | -0.77 | -12.34 | 3.82  | -1.34 |
| 8534 | c1cc2c(nc1)sc(=O)o2              | C05331463 | -10.63 | 0.53  | -14.86 | 6.11  | -2.41 |
| 8535 | c1nc2nnc(c(n2n1)[O-])N           | C06057109 | -10.63 | -6.57 | -18.24 | 12.07 | 2.11  |
| 8536 | C/1(=N)O)C(=N)O)N=C(C(=O)N1)[O-] | C06382801 | -10.63 | -5.15 | -16.44 | 8.59  | 2.36  |
| 8537 | c1cc(c(c1N)F)C#N)F               | C06658048 | -10.63 | 1.03  | -16.13 | 6.6   | -2.12 |
| 8538 | Cc1c(non1)c2ccn[nH]2             | C06667833 | -10.63 | -0.25 | -15.29 | 5.92  | -1.01 |
| 8539 | CNC(=S)n1c(ncn1)N                | C08642390 | -10.63 | -7.18 | -7.41  | 7.34  | -3.39 |
| 8540 | CC(=O)NCC(=O)Cl                  | C11892187 | -10.63 | -0.83 | -14.21 | 4.74  | -0.33 |
| 8541 | c1cncc2c1[nH]cc2Cl               | C14985673 | -10.63 | -3.64 | -9.5   | 5.04  | -2.52 |
| 8542 | CCC(=O)[C@H](C)Br                | C19843048 | -10.63 | -1.28 | -11.03 | 4.88  | -3.2  |
| 8543 | c1ccc(cc1)CNCC#N                 | C19943362 | -10.63 | -1.83 | -12.02 | 5.95  | -2.73 |
| 8544 | c1cc2c(cc1S)CCO2                 | C20431100 | -10.63 | -1.77 | -8.21  | 2.65  | -3.3  |
| 8545 | CC(=O)c1cc(ccc1O)F               | C00152766 | -10.62 | -0.44 | -12.76 | 5.22  | -2.63 |
| 8546 | C[C@@H](C(=O)C)O                 | C00895238 | -10.62 | -2.11 | -12.37 | 4.28  | -0.41 |

|      |                                  |           |        |       |        |       |       |
|------|----------------------------------|-----------|--------|-------|--------|-------|-------|
| 8547 | CCC(=O)C                         | C00901514 | -10.62 | -0.99 | -11.37 | 3.85  | -2.11 |
| 8548 | c1c(non1)N)c2c(non2)N            | C01063399 | -10.62 | -0.42 | -15.09 | 4.05  | 0.84  |
| 8549 | CC1=CC(=O)N(C1=O)CO              | C01740833 | -10.62 | -4.27 | -15.77 | 7.58  | 1.84  |
| 8550 | C=C1CCC[C@@H]1O                  | C02032076 | -10.62 | -1.23 | -9.51  | 1.69  | -1.58 |
| 8551 | C[C@@H]1C(=O)NC(O1)(C)C          | C02048374 | -10.62 | -1.02 | -14.42 | 4.23  | 0.6   |
| 8552 | CC(C)C(=O)NN/C=C/Cl              | C03282531 | -10.62 | 0.14  | -13.86 | 5.29  | -2.19 |
| 8553 | C1C[C@H]([C@H]2[C@H]1C2)O        | C05049665 | -10.62 | -0.85 | -10.83 | 2.15  | -1.08 |
| 8554 | CCOC1ccc(=S)[nH]1                | C05576352 | -10.62 | -0.23 | -15.77 | 4.43  | 0.95  |
| 8555 | C(#N)[C@H](F)Br                  | C08698383 | -10.62 | -0.01 | -12.28 | 3.7   | -2.03 |
| 8556 | c1cc(ccc1CC(=O)N)F               | C09425746 | -10.62 | -0.95 | -15.99 | 7.84  | -1.52 |
| 8557 | c1c2c(ncn1)N=CNC2                | C17158014 | -10.62 | 0.48  | -18.58 | 9.82  | -2.34 |
| 8558 | C/C=C/[C@H]1C=CC(=O)O1           | C17299316 | -10.62 | -1.1  | -13.03 | 7.03  | -3.52 |
| 8559 | C[NH+]1CCN(CC1)C#N               | C22002350 | -10.62 | 0.03  | -11.21 | 3.59  | -3.03 |
| 8560 | c1c(n[nH]1)CC#N                  | C26507092 | -10.62 | -2.28 | -17.35 | 9.4   | -0.4  |
| 8561 | C(c1c(c(c(c1F)F)F)F)ON           | C01564467 | -10.61 | 1.42  | -12.56 | 2.5   | -1.97 |
| 8562 | c1c(cc(c(c1F)NC(=S)NN)F)F        | C02528165 | -10.61 | 2.26  | -18.66 | 8.7   | -2.9  |
| 8563 | c1csc(n1)NN                      | C02555415 | -10.61 | -3.33 | -16.1  | 4.5   | 4.31  |
| 8564 | Cc1[nH]c(nn1)[S-]                | C02556115 | -10.61 | -2.9  | -14.77 | 9.07  | -2.01 |
| 8565 | C1C[C@@H]2CC(=O)C=C2C1           | C03122099 | -10.61 | 0.89  | -15.14 | 4.27  | -0.62 |
| 8566 | c1c(nc([nH]c1=O)N)N              | C08602956 | -10.61 | -3.3  | -15.94 | 5.95  | 2.68  |
| 8567 | Cc1ccc1CO                        | C12370518 | -10.61 | -1.26 | -13.94 | 4.98  | -0.39 |
| 8568 | CCn1cc[nH]c1=S                   | C12505185 | -10.61 | -1.18 | -11.28 | 4.76  | -2.92 |
| 8569 | Cc1c(cnn1C)Br                    | C14988517 | -10.61 | -0.13 | -12.04 | 4.04  | -2.49 |
| 8570 | c1csc(c1C(F)F)FBr                | C15442246 | -10.61 | -2.43 | -6.86  | 2.48  | -3.8  |
| 8571 | C[C@H](CC(F)F)F)O                | C16082633 | -10.61 | -0.99 | -12.2  | 3.34  | -0.76 |
| 8572 | c1cc2c(c(c1F)O)CC2=O             | C16083119 | -10.61 | 0.17  | -13.15 | 5     | -2.62 |
| 8573 | c1[nH]c2c(=O)[nH]c(nc2n1)F       | C17174075 | -10.61 | -3.46 | -16.86 | 10.96 | -1.25 |
| 8574 | c1nc2c(c(n1)NN)nsn2              | C17352449 | -10.61 | -1.56 | -15.8  | 6.79  | -0.05 |
| 8575 | c1c(nc2n1CCS2)CCl                | C20272874 | -10.61 | -1.8  | -13.05 | 8.17  | -3.93 |
| 8576 | Cc1ccsc1Br                       | C00166959 | -10.6  | 0.16  | -12.49 | 1.8   | -0.07 |
| 8577 | c1cc2c(cc1C(=O)NN)non2           | C00171002 | -10.6  | -4.26 | -15.73 | 9.36  | 0.02  |
| 8578 | c1c(ncn1NN)NN                    | C00967279 | -10.6  | -3.32 | -13.31 | 5.92  | 0.11  |
| 8579 | CNC(=O)c1ccccc1                  | C01561776 | -10.6  | -2.5  | -14.5  | 7.04  | -0.64 |
| 8580 | C1C(=O)OC2(O)C=CC(=O)C=C2        | C01585857 | -10.6  | -2.39 | -13.05 | 7.18  | -2.35 |
| 8581 | CCOC(=O)[C@H](C)Cl               | C01605305 | -10.6  | -0.3  | -10.21 | 3.33  | -3.42 |
| 8582 | c1cc(ccc1N)CO)F                  | C02243178 | -10.6  | -1    | -13.49 | 3.77  | 0.12  |
| 8583 | CCOC(=O)c1cncc1N                 | C05175382 | -10.6  | -1.91 | -12.46 | 4.36  | -0.59 |
| 8584 | CCCCN[N+](=O)[O-]                | C05309281 | -10.6  | 1.35  | -16.59 | 4.14  | 0.5   |
| 8585 | CC[C@H]1CC(=C)C)O                | C05922828 | -10.6  | -2.64 | -9.3   | 1.51  | -0.17 |
| 8586 | C([N-]/C(=N/[N+](=O)[O-])/N)O    | C06013662 | -10.6  | -4.83 | -16.13 | 4.86  | 5.5   |
| 8587 | Cn1ccc(n1)C(=O)Cl                | C06319681 | -10.6  | -2.71 | -11.74 | 6.02  | -2.17 |
| 8588 | Cc1ncc(s1)C=O                    | C13483707 | -10.6  | -2.74 | -12.58 | 6.5   | -1.78 |
| 8589 | COc1ccccc1O                      | C13512224 | -10.6  | 0.47  | -17.09 | 8.73  | -2.71 |
| 8590 | c1c(c(cc2c1OC(O2)(F)F)F)N        | C15443437 | -10.6  | -0.33 | -12.06 | 2.97  | -1.17 |
| 8591 | C/C=C(C(=N)N)C)C                 | C17002836 | -10.6  | -0.19 | -10.94 | 3.07  | -2.54 |
| 8592 | CCn1cc(nn1)N                     | C19089904 | -10.6  | -1.05 | -15.53 | 6.75  | -0.77 |
| 8593 | c1cc(c(nc1)n2ccnc2)N             | C20285771 | -10.6  | -3.74 | -11.05 | 7.31  | -3.12 |
| 8594 | CNC(=O)c1c([nH]cn1)N             | C22130313 | -10.6  | -4.97 | -15.6  | 9.61  | 0.36  |
| 8595 | c1ccn(c1)Cc2cccnc2               | C00074128 | -10.59 | -0.57 | -10.49 | 5.14  | -4.67 |
| 8596 | c1cc(nc1CO)Cl                    | C00169496 | -10.59 | -2.52 | -12.71 | 4.88  | -0.24 |
| 8597 | C(CC(=O)N)C(=O)N                 | C01235985 | -10.59 | -5.61 | -15.63 | 7.03  | 3.62  |
| 8598 | CC(=O)NCC#N                      | C01610226 | -10.59 | -1.54 | -14.92 | 6.3   | -0.43 |
| 8599 | CC(=O)NCC#C                      | C01679299 | -10.59 | -0.37 | -14.77 | 5.44  | -0.89 |
| 8600 | CCCC(=O)OCCO                     | C01729706 | -10.59 | -1.53 | -13.35 | 5.31  | -1.02 |
| 8601 | C/C=C(\C)C(=O)N                  | C01763170 | -10.59 | -1.35 | -14.79 | 5.64  | -0.1  |
| 8602 | CC(=O)OCCOC                      | C02041072 | -10.59 | 1.66  | -15.58 | 5.08  | -1.75 |
| 8603 | CSc1nnc(s1)[S-]                  | C02269606 | -10.59 | -1.93 | -11.87 | 5.07  | -1.87 |
| 8604 | C=CCSc1nc([nH]n1)N               | C02341236 | -10.59 | -3.78 | -15.23 | 6.01  | 2.41  |
| 8605 | CNC(=O)[C@H](F)Br                | C02525276 | -10.59 | -1.15 | -13.65 | 4.86  | -0.66 |
| 8606 | CC(C)Nc1ccc(c1)F                 | C02540332 | -10.59 | -1.91 | -7.35  | 2.48  | -3.81 |
| 8607 | CNc1cc(nc(n1)N)F                 | C02565663 | -10.59 | -0.28 | -17.29 | 4.65  | 2.33  |
| 8608 | C1COC(OC1)CCO                    | C04748100 | -10.59 | -2.22 | -15.03 | 4.07  | 2.59  |
| 8609 | CCCC/C=C/C#N                     | C05103575 | -10.59 | -0.2  | -12.94 | 4.89  | -2.34 |
| 8610 | CCCCNC(=S)[S-]                   | C05513833 | -10.59 | -0.05 | -14.31 | 1.66  | 2.11  |
| 8611 | c1cnc(nc1)Nc2ccc(cc2)F           | C06665763 | -10.59 | 0.86  | -10.97 | 5.11  | -5.59 |
| 8612 | Cc1cc(n/c(=N/C#N)/[nH]1)[O-]     | C08732302 | -10.59 | -0.43 | -15.62 | 9.89  | -4.43 |
| 8613 | c1[nH]c2c([n+](cnc2n1)[O-])N     | C12428237 | -10.59 | -5.12 | -16.57 | 13.07 | -1.97 |
| 8614 | CC(=O)NNC(=O)N                   | C13404423 | -10.59 | -4.37 | -16.53 | 6.33  | 3.98  |
| 8615 | CS(=O)(=O)n1cc(cn1)Br            | C14218543 | -10.59 | -1.79 | -17.1  | 8.54  | -0.25 |
| 8616 | CC(=O)OCC=C(F)F                  | C14628854 | -10.59 | -0.83 | -10.59 | 4.37  | -3.54 |
| 8617 | C1CSCCC1=O                       | C16046250 | -10.59 | 0.27  | -11.57 | 3.4   | -2.7  |
| 8618 | c1cc2c(=O)[nH]cnc2nc1            | C18009656 | -10.59 | -3.49 | -15.13 | 10.09 | -2.06 |
| 8619 | C#CCSc1cnc(s1)N                  | C19516851 | -10.59 | -1.75 | -12.88 | 6.71  | -2.66 |
| 8620 | c1ccc(c(c1F)SCC(=[NH2+]))N       | C19848079 | -10.59 | 2.43  | -20.68 | 10.02 | -2.36 |
| 8621 | CCCNc1ncccc1                     | C20548294 | -10.59 | -1.28 | -10.04 | 4.43  | -3.7  |
| 8622 | C[C@H](CCS)S                     | C25695484 | -10.59 | 0.4   | -10.14 | 2.15  | -3    |
| 8623 | C1C=C[C@H]2[C@H]1OC(=O)[C@H]2C=O | C00336459 | -10.58 | -1.5  | -13.14 | 7.06  | -3    |
| 8624 | CC(=C)C(=O)N                     | C01608589 | -10.58 | -2.16 | -14.28 | 5.42  | 0.44  |
| 8625 | Cn1c(=O)c(c[nH]c1=O)Br           | C01713470 | -10.58 | -4.55 | -13.38 | 8.36  | -1.01 |
| 8626 | Cc1cnn(c1)CC(=O)Cl               | C02521306 | -10.58 | -3.26 | -12.25 | 7.89  | -2.95 |
| 8627 | C#CCNC(=O)CCl                    | C02565077 | -10.58 | -1.15 | -14.19 | 6.23  | -1.48 |
| 8628 | c1cc(c(cc1F)F)NC(=O)C(=O)N       | C04858496 | -10.58 | -7.46 | -8.07  | 4.5   | 0.46  |
| 8629 | C1=NNC=NN1                       | C05133229 | -10.58 | -2.42 | -14.78 | 5.66  | 0.96  |
| 8630 | c1([nH]c(=O)sn1)[S-]             | C06523894 | -10.58 | -4.45 | -16.07 | 6.6   | 3.34  |
| 8631 | CCc1cc(om1)CO                    | C13483628 | -10.58 | -1.38 | -14.28 | 5.68  | -0.6  |
| 8632 | CC/C(=N)O/C(=O)OCC               | C16889901 | -10.58 | 0.26  | -13.25 | 3.69  | -1.27 |
| 8633 | CCOC(=O)c1[nH]cnc(n1)N           | C18168376 | -10.58 | -3.17 | -13.32 | 8.24  | -2.32 |
| 8634 | c1c(cn(n1)CCBr)Cl                | C19089276 | -10.58 | -3.41 | -6.82  | 3.09  | -3.45 |
| 8635 | Cc1c(cn(n1)C)C=O                 | C20443711 | -10.58 | -2.17 | -11.99 | 6.59  | -3.02 |
| 8636 | Cc1c(non1)C=O                    | C20446269 | -10.58 | -2.44 | -15.34 | 8.39  | -1.19 |

|      |                                  |           |        |       |        |       |       |
|------|----------------------------------|-----------|--------|-------|--------|-------|-------|
| 8637 | C(=NC(C(F)(F)F)(Cl)Cl)=O         | C26438340 | -10.58 | -0.55 | -9.78  | 0.52  | -0.77 |
| 8638 | c1ccc(cc1O)O=C=O                 | C00154704 | -10.57 | -2.96 | -15.02 | 7.32  | 0.09  |
| 8639 | c1cn(c(=O)[nH]c1=O)CCC#N         | C02325345 | -10.57 | -3.07 | -20.85 | 13.73 | -0.38 |
| 8640 | c1cc2c(c(c1)F)[C@H](C2)O         | C03847715 | -10.57 | -2.13 | -10.67 | 4.04  | -1.81 |
| 8641 | CSc1ccc(c(c1)O)N                 | C04773741 | -10.57 | 0.05  | -16.89 | 3.97  | 2.3   |
| 8642 | CC[C@H](C(=O)C)S                 | C04802634 | -10.57 | -1.25 | -9.25  | 2.55  | -2.61 |
| 8643 | Cc1cc[nH]1CCO                    | C05386774 | -10.57 | -3.85 | -11.91 | 4.88  | 0.3   |
| 8644 | c1cc(=O)n(cc1C(F)(F)F)O          | C05567248 | -10.57 | -2.66 | -10.99 | 4.89  | -1.8  |
| 8645 | CC[C@H](C#N)Cl                   | C05924267 | -10.57 | 0.25  | -11.45 | 3.47  | -2.83 |
| 8646 | c1c(ncc(n1)Cl)C(=O)N             | C06091417 | -10.57 | -2.52 | -15.19 | 4.53  | 2.6   |
| 8647 | CCOc1cc(cnc1)C=O                 | C06643312 | -10.57 | -3.42 | -11.78 | 5.99  | -1.36 |
| 8648 | C(c1nc(nc1)c2c(non2)N)O          | C06658068 | -10.57 | -0.33 | -20.44 | 7.61  | 2.59  |
| 8649 | c1ccc(c(c1)C=C[N+](=O)[O-])F     | C17001716 | -10.57 | -1.83 | -9.49  | 5.61  | -4.86 |
| 8650 | CCOC(=O)c1cnoc1O                 | C18217813 | -10.57 | -2.12 | -11.88 | 5.03  | -1.6  |
| 8651 | CCNc1cccc(c1)F                   | C19920945 | -10.57 | -1.7  | -7.45  | 2.45  | -3.87 |
| 8652 | COC(=O)CNC1cccc1F                | C20052505 | -10.57 | -3.41 | -9.11  | 5.35  | -3.38 |
| 8653 | c1c(ncn1)C(=S)N                  | C30677885 | -10.57 | -3.4  | -17.32 | 9     | 1.15  |
| 8654 | c1cc(ccc1C#N)OC(F)F              | C00167211 | -10.56 | 0.25  | -13.35 | 5.39  | -2.84 |
| 8655 | C1C[C@H]2[C@@H]1C=C2             | C01590021 | -10.56 | -0.32 | -6.95  | 0.48  | -3.78 |
| 8656 | CC(C)CCC#N                       | C01693282 | -10.56 | 0.15  | -11.49 | 4.29  | -3.5  |
| 8657 | C=CC(=O)c1cccc1                  | C01702416 | -10.56 | 1.69  | -15.87 | 5.24  | -1.61 |
| 8658 | c1c(c(c(c1F)C=O)F)F              | C02534395 | -10.56 | 0.46  | -12.09 | 4.37  | -3.3  |
| 8659 | C[C@H](CC=C=C(C)C)O              | C03163363 | -10.56 | -0.3  | -10.43 | 2.66  | -2.49 |
| 8660 | Cc1c(c[nH]n1)C#N[N+](=O)[O-]     | C04878133 | -10.56 | -3.17 | -10.34 | 4.88  | -1.92 |
| 8661 | C1C=C[C@H]2[C@@H]1[C@@H]2C=O     | C05104757 | -10.56 | 0.03  | -13.85 | 4.2   | -0.94 |
| 8662 | C[C@@H]1C(=C(C(=O)O1)[O-])C(=O)C | C05120728 | -10.56 | -4.76 | -13.85 | 9.82  | -1.77 |
| 8663 | CC[C@H](C(F)F)O                  | C08698396 | -10.56 | -1.26 | -10.44 | 1.89  | -0.76 |
| 8664 | c1c(c(c[nH]c1=O)F)C=O            | C15444615 | -10.56 | -3.35 | -13.41 | 5.08  | 1.13  |
| 8665 | C[C@@H]1CC[C@@H](O1)C            | C17146431 | -10.56 | 0.2   | -10.1  | 1.71  | -2.37 |
| 8666 | C/C(=N/O)/Nc1cccc1               | C17991431 | -10.56 | -1.11 | -11.74 | 4.07  | -1.77 |
| 8667 | c1cc(ccc1F)NCC#N)F               | C20045038 | -10.56 | -3.71 | -9.19  | 5.4   | -3.06 |
| 8668 | C(C=C)Nc1cccc1                   | W2004A012 | -10.56 | -0.22 | -8.36  | 1.74  | -3.72 |
| 8669 | c1ccc(cc1)C(=O)NC#N              | C00392325 | -10.55 | -2.32 | -11.39 | 7.87  | -4.71 |
| 8670 | CNC(=O)c1cccnc1                  | C00404444 | -10.55 | -1.91 | -14.57 | 6.56  | -0.62 |
| 8671 | CCOCc1cnc(nc1)N                  | C01670184 | -10.55 | -1.99 | -13.76 | 3.8   | 1.4   |
| 8672 | CCO[C@H](C)C=O                   | C01680393 | -10.55 | -0.67 | -11.73 | 3.39  | -1.54 |
| 8673 | CC1=C[F@@]1(=O)CC1OC             | C01701241 | -10.55 | 0.97  | -14.67 | 4.95  | -1.79 |
| 8674 | C/C=C/1CCOC1=O                   | C01752912 | -10.55 | -1.47 | -14.65 | 6.91  | -1.34 |
| 8675 | CC(=O)c1cnn(c1)C                 | C02531017 | -10.55 | 1.4   | -16.15 | 6.42  | -2.21 |
| 8676 | c1cc(ccc1F)c2ccno2)F             | C02578081 | -10.55 | 0.08  | -12.75 | 4.94  | -2.81 |
| 8677 | C(C(F)(F)F)(C(F)F)F)O-           | C03860857 | -10.55 | -1.58 | -11.06 | 2.43  | -0.34 |
| 8678 | c1c(nc[nH]1)C=O                  | C04085738 | -10.55 | -3.12 | -15.5  | 9.34  | -1.27 |
| 8679 | COC(=S)S                         | C04404464 | -10.55 | -2.47 | -11.33 | 4.35  | -1.09 |
| 8680 | Cc1nc(c(n1N)N)C(=O)N             | C04879118 | -10.55 | -8.86 | -10.33 | 6.91  | 1.74  |
| 8681 | c1nc([nH]n1)CC#N                 | C05650337 | -10.55 | -5.53 | -12.92 | 10.19 | -2.29 |
| 8682 | COCCc1nnc(s1)Br                  | C11920186 | -10.55 | -2.83 | -11.78 | 4.89  | -0.84 |
| 8683 | CCn1cc(c(n1)[N+](=O)[O-])Cl      | C12395851 | -10.55 | -3.81 | -10.95 | 8.3   | -4.09 |
| 8684 | CCCCON                           | C14986309 | -10.55 | -2.56 | -9.22  | 1.93  | -0.69 |
| 8685 | c1(c(c(c(nc1N)F)Br)F             | C16159829 | -10.55 | -3.29 | -7.74  | 2.1   | -1.61 |
| 8686 | C[C@H]1[C@@H]1N=C=O              | C19518770 | -10.55 | -1.05 | -10.95 | 1.89  | -0.44 |
| 8687 | CCOC(=O)c1ccc(cc1)F              | C21299997 | -10.55 | 1.53  | -12.44 | 5.05  | -4.69 |
| 8688 | Cn1c(nnn1)CCl                    | C26466853 | -10.55 | -1.7  | -15.72 | 8.15  | -1.28 |
| 8689 | c1cc(sc1C=O)[N+](=O)[O-]         | C00154896 | -10.54 | -4.49 | -11.68 | 8.68  | -3.04 |
| 8690 | Cc1cc(n1)CO                      | C00158682 | -10.54 | -2.75 | -12.59 | 4.83  | -0.03 |
| 8691 | C[C@H]1CCOCO1                    | C00388133 | -10.54 | -0.15 | -11.64 | 2.49  | -1.25 |
| 8692 | CCOC(=O)CSC                      | C00407006 | -10.54 | -0.38 | -11.81 | 4.84  | -3.2  |
| 8693 | CCCCO                            | C01530354 | -10.54 | -1.83 | -10.41 | 1.87  | -0.17 |
| 8694 | CCCCCO                           | C01699882 | -10.54 | -2.6  | -8.57  | 1.88  | -1.25 |
| 8695 | Cc1c(cccc1F)[N+](=O)[O-]         | C01706175 | -10.54 | -0.92 | -12.25 | 4.58  | -1.94 |
| 8696 | Cc1nnc(n1N)SC                    | C02536944 | -10.54 | -4.94 | -9.3   | 5.99  | -2.29 |
| 8697 | CCNc1[nH]ncc(=O)n1               | C05009506 | -10.54 | -3.78 | -10.86 | 6.06  | -1.95 |
| 8698 | C(#N)(C(F)F)F                    | C05019026 | -10.54 | 0.1   | -10.31 | 1.41  | -1.74 |
| 8699 | C/C(=N/O)/CS                     | C05184170 | -10.54 | -2.47 | -13.09 | 4.26  | 0.76  |
| 8700 | CCC/C=N/NC(=S)N                  | C05460935 | -10.54 | 1.41  | -17.55 | 4.98  | 0.61  |
| 8701 | c1c(c(n[nH]c1=S)S)[S-]           | C08649840 | -10.54 | -2.29 | -9.99  | 3.06  | -1.32 |
| 8702 | Cn1c(cnc1[N+](=O)[O-])C(=O)NN    | C13207565 | -10.54 | -3.31 | -14.36 | 8.95  | -1.82 |
| 8703 | C(=N/O)(C(=S)N)N                 | C13548708 | -10.54 | -4.22 | -14.56 | 5.93  | 2.31  |
| 8704 | CC(=O)O/N=C(/c1ncon1)N           | C13633639 | -10.54 | -3.89 | -20.36 | 14.18 | -0.47 |
| 8705 | c1c[nH]c(cc1=O)[N+](=O)[O-]      | C14982962 | -10.54 | -4.05 | -13.44 | 8.16  | -1.21 |
| 8706 | C/C(=N/O)C/C(=O)C                | C16892202 | -10.54 | 0.98  | -12.92 | 3.07  | -1.67 |
| 8707 | c1cc(cc1)COCCC#N                 | C19474580 | -10.54 | -2.03 | -12.09 | 6.63  | -3.05 |
| 8708 | COC(=O)COCCCl                    | C21990560 | -10.54 | -0.82 | -14.36 | 7.36  | -2.71 |
| 8709 | c1ccc(cc1)[S@](=O)C=C(Cl)Cl      | C26442914 | -10.54 | 2.89  | -16.78 | 7.21  | -3.85 |
| 8710 | c1cc(cnc1)/C(=C/C=O)/[O-]        | C26515429 | -10.54 | 0.32  | -15.9  | 7.06  | -2.03 |
| 8711 | CSCc1cccc(c1)N                   | C32500881 | -10.54 | -1.09 | -9.9   | 3.69  | -3.24 |
| 8712 | CC(=C)CCC=C)C                    | G2008A007 | -10.54 | 0.28  | -6.56  | 0.49  | -4.74 |
| 8713 | CCC(=O)c1cccs1                   | C00159604 | -10.53 | 1.84  | -16.08 | 4.43  | -0.73 |
| 8714 | Cc1cncnc1Br                      | C00331645 | -10.53 | -1.86 | -11.32 | 2.6   | 0.05  |
| 8715 | CC(=C1C(=O)NC(=O)N1)C            | C01581674 | -10.53 | -2.96 | -13.27 | 5.68  | 0.01  |
| 8716 | CCOCc1ccc(c(c1)O)N               | C01705932 | -10.53 | -3.69 | -11.01 | 4.1   | 0.08  |
| 8717 | C=NOCCc1c(c(c(c1F)F)F)F          | C02556849 | -10.53 | 1.61  | -12.32 | 3.88  | -3.7  |
| 8718 | CC(=O)C1=CNC(=O)CC1              | C04267740 | -10.53 | 1.33  | -17.22 | 6.78  | -1.42 |
| 8719 | CCOC(=O)O[C@@H](C)Cl             | C04521312 | -10.53 | -0.21 | -10.89 | 3.88  | -3.3  |
| 8720 | C1COC(=O)[C@H]1Cl                | C05134263 | -10.53 | -0.55 | -13.04 | 5.41  | -2.36 |
| 8721 | C[C@H](c1cccc1)S                 | C05138833 | -10.53 | -1.5  | -6.22  | 1.59  | -4.4  |
| 8722 | Cc1nc(cs1)COC                    | C05943281 | -10.53 | -2.2  | -10.1  | 3.45  | -1.68 |
| 8723 | Cc1c(c(=O)[nH]cn1)Cl             | C08672847 | -10.53 | -1.11 | -13.57 | 3.81  | 0.34  |
| 8724 | c1cn(nc1C(F)F)CCO                | C12357744 | -10.53 | -3.88 | -11.6  | 5.61  | -0.66 |
| 8725 | c1cnc(c1)[N+](=O)[O-]Br          | C12969571 | -10.53 | 0.03  | -12.1  | 4.42  | -2.88 |
| 8726 | COCc1ccc(nc1)NN=O                | C13213271 | -10.53 | -3.16 | -13.49 | 6.84  | -0.72 |



|      |                                |           |        |       |        |       |       |
|------|--------------------------------|-----------|--------|-------|--------|-------|-------|
| 8727 | c1[nH]c2c(n1)[nH]c(=O)[nH]c2=O | C13517187 | -10.53 | -2.55 | -16.92 | 8.7   | 0.24  |
| 8728 | COc1c(O)ccc1                   | C16158968 | -10.53 | -0.94 | -12.96 | 4.37  | -1    |
| 8729 | c1c(O)ccc2c(O)c1               | C21813546 | -10.53 | -1.16 | -11.26 | 4.96  | -3.07 |
| 8730 | CC(C)C(=O)OCCl                 | C22114223 | -10.53 | 0.44  | -11.67 | 3.95  | -3.25 |
| 8731 | Cc1cc(O)ccc1                   | M1995A020 | -10.53 | -0.64 | -6.49  | 1.36  | -4.76 |
| 8732 | C1CCC(=O)CC(=O)C1              | C00403358 | -10.52 | -5.36 | -13.63 | 8.82  | -0.36 |
| 8733 | c1cc(O)c1C(=O)C(=O)NC(=O)N2    | C01688442 | -10.52 | 0.33  | -17.4  | 6.68  | -0.13 |
| 8734 | CCOC#C                         | C01850917 | -10.52 | -0.76 | -11.03 | 2.9   | -1.63 |
| 8735 | C[C@H](CO)Cl                   | C02041254 | -10.52 | -1.55 | -10.59 | 1.77  | -0.15 |
| 8736 | COC1=CC(=O)OC1                 | C02149451 | -10.52 | -3.45 | -13.03 | 7.52  | -1.56 |
| 8737 | CC(=O)c1ccc(O)cc1              | C02173163 | -10.52 | -2.55 | -10.35 | 5.28  | -2.9  |
| 8738 | C1COC(O)CBr                    | C02242713 | -10.52 | 1.2   | -13.47 | 3.11  | -1.36 |
| 8739 | C1=NC(=O)NC(=O)C1=[N+]=[N-]    | C04215596 | -10.52 | -3.67 | -19.24 | 9.32  | 3.07  |
| 8740 | CNc1c2cn[nH]c2ncn1             | C04353394 | -10.52 | -1.72 | -13.09 | 6.18  | -1.9  |
| 8741 | C(=S)(C(=S)N)N                 | C04695122 | -10.52 | -8.45 | -12.81 | 6.25  | 4.49  |
| 8742 | CS1ccc(O)cc1                   | C15021754 | -10.52 | -1.07 | -13.77 | 5.56  | -1.23 |
| 8743 | c1ccc(O)c1C#CO                 | C16053620 | -10.52 | -0.73 | -14.35 | 6.82  | -2.25 |
| 8744 | CCc1c(O)n(C(=O)[nH]n1)N        | C16161121 | -10.52 | 0.85  | -16.7  | 4.7   | 0.62  |
| 8745 | c1ccc2=C(C(=O)c2)O             | C16929807 | -10.52 | -3.71 | -13.9  | 7.05  | 0.04  |
| 8746 | c1cc(O)c(F)c1C(=O)C            | C18899435 | -10.52 | 0.97  | -11.94 | 3.21  | -2.76 |
| 8747 | C[C@H]1[C@H]2NC(=O)C           | C19518772 | -10.52 | -0.57 | -11.16 | 2.15  | -0.93 |
| 8748 | Cc1cc(O)ccc1                   | C19721279 | -10.52 | -1.87 | -9.94  | 4.22  | -2.93 |
| 8749 | [C@@H]1(C(=O)C(=O)O)C(Cl)C1    | C19864827 | -10.52 | -0.19 | -11.7  | 4.29  | -2.92 |
| 8750 | C#Cc1c[nH]c(=O)[nH]c1=O        | C00005467 | -10.51 | -2.64 | -19.12 | 10.41 | 0.84  |
| 8751 | Cc1ccc(O)c1N(N)C(=O)C          | C00152518 | -10.51 | -1.86 | -14.37 | 7.39  | -1.67 |
| 8752 | c1(cc(O)c1)C1=O                | C00896288 | -10.51 | -0.29 | -12.66 | 4.38  | -1.94 |
| 8753 | C=CCN1C(=O)CNC1=O              | C01408334 | -10.51 | -0.83 | -16.13 | 6.93  | -0.48 |
| 8754 | c1cc2c(O)c1nsn2                | C01557822 | -10.51 | -2.44 | -17.52 | 7.36  | 2.09  |
| 8755 | C=C[C@H](C)O                   | C01572827 | -10.51 | -1.27 | -14.98 | 6.43  | -0.69 |
| 8756 | c1ccc(O)c1C(=O)N               | C04770645 | -10.51 | -1.17 | -14.63 | 6.93  | -1.64 |
| 8757 | CN(C(=O)N)C(=O)C               | C05351574 | -10.51 | 0.25  | -16.01 | 4.18  | 1.08  |
| 8758 | c1(=O)[nH]c(O)c1               | C05706506 | -10.51 | -2.42 | -14.92 | 5.01  | 1.82  |
| 8759 | c1ccc(O)c1CNC(=O)CS            | C08701494 | -10.51 | -0.22 | -15.25 | 6.56  | -1.6  |
| 8760 | CN1C(=O)[C@H](C(=O)NC1=O)Cl    | C15417086 | -10.51 | -0.29 | -14.79 | 4.58  | -0.01 |
| 8761 | Cc1ccc(O)c1                    | C16697993 | -10.51 | -2.17 | -16.51 | 6.78  | 1.4   |
| 8762 | COCC1ccc(O)cc1                 | C19255060 | -10.51 | -0.31 | -11.5  | 3.38  | -2.09 |
| 8763 | C[C@H](C#N)NCC=C               | C20177396 | -10.51 | 0.31  | -13.68 | 4.44  | -1.58 |
| 8764 | Cc1ccc(O)c1                    | C20443741 | -10.51 | -1.79 | -14.6  | 5.71  | 0.18  |
| 8765 | c1ccc(O)c1N                    | C20548919 | -10.51 | -2.98 | -14.19 | 7.08  | -0.42 |
| 8766 | Cc1ccc(O)c1                    | C28531853 | -10.51 | -3.87 | -13.54 | 9.85  | -2.94 |
| 8767 | Cc1ccc(O)c1                    | C00058199 | -10.5  | -2.08 | -11.09 | 4.67  | -2    |
| 8768 | C=C1[C@H](C)C(=O)C#N           | C01571997 | -10.5  | -1.14 | -13.88 | 6.66  | -2.13 |
| 8769 | COCC(C)C                       | C01845918 | -10.5  | -0.2  | -8.56  | 1.1   | -2.84 |
| 8770 | C[C@H](C(=O)C)O                | C02048535 | -10.5  | -0.52 | -12.55 | 2.2   | 0.36  |
| 8771 | CCCN1ccc(O)cc1                 | C02537951 | -10.5  | 0.11  | -13.35 | 4.99  | -2.24 |
| 8772 | CCN1ccc(O)cc1                  | C02559424 | -10.5  | -2.82 | -14.69 | 9.3   | -2.29 |
| 8773 | c1(cc(O)c1)N                   | C04018140 | -10.5  | -2.92 | -17.38 | 6.47  | 3.34  |
| 8774 | C(CSCCS)S                      | C04362785 | -10.5  | -1.68 | -6.41  | 1.08  | -3.49 |
| 8775 | C[C@H]1C(=O)NN=CN1             | C05369229 | -10.5  | -3.15 | -16.21 | 6.88  | 1.99  |
| 8776 | c1cc(O)c1S(=O)(=O)O            | C06467618 | -10.5  | -3.98 | -19.27 | 8.6   | 4.15  |
| 8777 | C[C@H](c1ccc(O)cc1)O           | C06733580 | -10.5  | -3.02 | -11.08 | 3.67  | -0.07 |
| 8778 | Cc1ccc(O)cc1                   | C12360060 | -10.5  | 0.82  | -11.49 | 3.42  | -3.25 |
| 8779 | c1[nH]c(O)c(c1)[O-]            | C16886470 | -10.5  | -2.02 | -17.44 | 5.15  | 3.81  |
| 8780 | c1ccc(O)c1N                    | C17130304 | -10.5  | 0.22  | -13.35 | 5.42  | -2.79 |
| 8781 | CC(=O)C(=O)C                   | C18011157 | -10.5  | 0.4   | -11.17 | 3.87  | -3.6  |
| 8782 | c1ccc(O)c1O                    | C18887898 | -10.5  | -2.76 | -11.54 | 4.35  | -0.55 |
| 8783 | c1cc(O)c1C                     | C19730642 | -10.5  | -1.97 | -12.96 | 5.88  | -1.46 |
| 8784 | C1CCC2c(O)c1                   | C22126212 | -10.5  | -2.19 | -10.32 | 5.33  | -3.32 |
| 8785 | c1ccc2c(O)c1                   | C26515438 | -10.5  | -1.25 | -6.34  | 1.95  | -4.86 |
| 8786 | C1CN[C@H](CN1)C#N              | C26898490 | -10.5  | -1.85 | -14.76 | 5.01  | 1.1   |
| 8787 | Cc1ccc(O)c1                    | C00401676 | -10.49 | -3.79 | -11.84 | 5.55  | -0.41 |
| 8788 | CC(=O)Cn1c(O)[nH]c1=O          | C01084291 | -10.49 | 0.58  | -18.76 | 10.94 | -3.25 |
| 8789 | C(CCO)CO                       | C01599375 | -10.49 | -3.68 | -12.19 | 3.22  | 2.16  |
| 8790 | Cc1ccc2ncnc2c1                 | C01683867 | -10.49 | -3.75 | -14.02 | 9.64  | -2.35 |
| 8791 | c1ccc2c(O)[nH]c(O)c2           | C01703681 | -10.49 | -2.46 | -14.37 | 6.5   | -0.16 |
| 8792 | C[C@H]1C=CC(=O)C1=O            | C01706889 | -10.49 | -2.04 | -13.96 | 7.59  | -2.08 |
| 8793 | CC(=O)CCOC(=O)C                | C01719223 | -10.49 | -1.3  | -14.65 | 8.27  | -2.82 |
| 8794 | CC(=O)CCOC(=O)N                | C01731398 | -10.49 | -0.83 | -15.96 | 4.91  | 1.39  |
| 8795 | CCCN1c(O)[nH]c(O)c1            | C01757772 | -10.49 | 0.65  | -16.16 | 5.49  | -0.47 |
| 8796 | CC[C@H](C)CO                   | C02041128 | -10.49 | -1.45 | -9.42  | 1.64  | -1.27 |
| 8797 | c1ccc(O)c1C(=O)C               | C02559042 | -10.49 | -3.06 | -15.44 | 9.23  | -1.22 |
| 8798 | CCOC(=O)OCCl                   | C02559058 | -10.49 | 0.86  | -12.04 | 4.03  | -3.34 |
| 8799 | COc1ccc(O)c1                   | C04344107 | -10.49 | -0.31 | -13.85 | 3.77  | -0.11 |
| 8800 | CC[C@H](C(=O)C)Cl              | C05227373 | -10.49 | -0.93 | -10.66 | 1.92  | -0.82 |
| 8801 | c1ccc(O)c1CNC(=O)C(F)F         | C06334837 | -10.49 | -4.02 | -7.63  | 3.44  | -2.27 |
| 8802 | CC(=O)CSc1[nH]c1               | C08334467 | -10.49 | -2.54 | -13.25 | 8.35  | -3.05 |
| 8803 | c1[nH]c(O)c(O)c1               | C08615382 | -10.49 | -2.53 | -18.71 | 7.13  | 3.62  |
| 8804 | c1[nH]c(O)c2c(O)c1             | C13543038 | -10.49 | -6.35 | -17.08 | 8.2   | 4.74  |
| 8805 | Cc1ccc(O)c1                    | C14985731 | -10.49 | -4.83 | -8.19  | 3.47  | -0.94 |
| 8806 | c1cc(O)c(F)cc1NC(=S)N          | C16125760 | -10.49 | -1.95 | -17.45 | 11.48 | -2.58 |
| 8807 | CC(=O)C(=O)C                   | C17157292 | -10.49 | -2.16 | -11.12 | 4.18  | -1.39 |
| 8808 | c1ccc(O)c1                     | C19045764 | -10.49 | -0.94 | -10.82 | 4.74  | -3.48 |
| 8809 | c1ccc(O)c1                     | C19689129 | -10.49 | 1.33  | -17.43 | 9.42  | -3.81 |
| 8810 | CC1(C)C@H(C)C1                 | C20357970 | -10.49 | 0.11  | -9.46  | 2.37  | -3.51 |
| 8811 | Cc1ccc(O)c1                    | C20443719 | -10.49 | -2.66 | -14.29 | 6.43  | 0.03  |
| 8812 | c1ccc(O)c1                     | C20534453 | -10.49 | -3.78 | -14.36 | 8.65  | -1    |
| 8813 | CC(C)C=C(=O)O                  | C21304287 | -10.49 | 0.53  | -11.46 | 4.28  | -3.83 |
| 8814 | CC(C)c1ccc(O)c1                | C32005426 | -10.49 | 1.85  | -13.09 | 4.07  | -3.32 |
| 8815 | COC(=O)c1ccc(O)c1              | C00082364 | -10.48 | -2.9  | -10.05 | 4.08  | -1.61 |
| 8816 | COCC2(O)C#C                    | C01564788 | -10.48 | -1.62 | -12.81 | 5.88  | -1.94 |

|      |                                         |           |        |       |        |       |       |
|------|-----------------------------------------|-----------|--------|-------|--------|-------|-------|
| 8817 | CC(C)CCCO                               | C01592388 | -10.48 | -3.08 | -8.18  | 1.83  | -1.04 |
| 8818 | C=CC(CC=C)O                             | C01632707 | -10.48 | -1.01 | -9.32  | 1.7   | -1.86 |
| 8819 | CC[C@H](C#C)O                           | C01690299 | -10.48 | -0.94 | -10.93 | 2.14  | -0.74 |
| 8820 | CCCC#CCO                                | C01845729 | -10.48 | -1.84 | -11.58 | 4.11  | -1.17 |
| 8821 | CC(=O)Nn1cncn1                          | C02037314 | -10.48 | -1.95 | -18.7  | 10.78 | -0.61 |
| 8822 | C1CCC(CC1)OC(=O)Cl                      | C02243070 | -10.48 | 0.31  | -8.48  | 1.8   | -4.12 |
| 8823 | Cc1ccc(c(c1)F)CO                        | C02243230 | -10.48 | -1.75 | -9.8   | 3.05  | -1.98 |
| 8824 | C[C@H]1C(=O)N(C(=S)S1)N                 | C02798507 | -10.48 | 0.03  | -14.52 | 5.49  | -1.48 |
| 8825 | C1CCOC1                                 | C03593622 | -10.48 | -0.34 | -10.49 | 1.58  | -1.24 |
| 8826 | CC[C@H](C)SC#N                          | C04290565 | -10.48 | 0.04  | -10.19 | 2.86  | -3.19 |
| 8827 | C1C=C[C@H](C)C(F)(F)F                   | C05004377 | -10.48 | -0.43 | -10.09 | 1.54  | -1.5  |
| 8828 | c1ccc(cc1)F)NC(=O)NN                    | C05226052 | -10.48 | -1.43 | -16.85 | 8.49  | -0.68 |
| 8829 | Cc1cccn1CC=C                            | C05885712 | -10.48 | -1.35 | -9.9   | 2.73  | -1.96 |
| 8830 | c1ccc(c(c1)c2[nH]c(nn2)N)O              | C12404747 | -10.48 | -1.48 | -16.64 | 9.61  | -1.96 |
| 8831 | c1[nH]c(c(n1)C(F)(F)F)C(F)(F)F          | C13283503 | -10.48 | -2.19 | -11.69 | 6.35  | -2.95 |
| 8832 | Cc1c(nc(s1)N)N(=O)[O-][N+](=O)[O-]      | C15783911 | -10.48 | -2.43 | -13.89 | 10.4  | -4.55 |
| 8833 | C=C(C=O)C=O                             | C17060229 | -10.48 | -1.86 | -13.99 | 6.52  | -1.15 |
| 8834 | C1CCC(=N)C(=S)N)C1                      | C17730060 | -10.48 | 2.62  | -18.06 | 7.56  | -2.59 |
| 8835 | c1cc(ncc1C(F)(F)F)CO                    | C22200556 | -10.48 | -4.08 | -10.19 | 4.49  | -0.69 |
| 8836 | c1cnoc1CO                               | C26547716 | -10.48 | -4.48 | -13.06 | 6.56  | 0.49  |
| 8837 | Cc1nccc(n1)N                            | C00333686 | -10.47 | -1.42 | -14.91 | 4.42  | 1.44  |
| 8838 | CCNc1c(cncn1)N                          | C01592097 | -10.47 | -5.94 | -11.39 | 4.62  | 2.25  |
| 8839 | c1ccc(cc1)C2=CCC(=O)O2                  | C01723799 | -10.47 | -1.01 | -14.23 | 6.79  | -2.03 |
| 8840 | CCCCSSC                                 | C02038818 | -10.47 | -0.49 | -10.48 | 1.62  | -1.12 |
| 8841 | Cc1n[nH]c(c=s)n1C                       | C02566750 | -10.47 | -2.58 | -12.71 | 7.44  | -2.62 |
| 8842 | c1nncn1N=C(C)C(F)(F)F)O                 | C03164721 | -10.47 | -3.02 | -13.34 | 8.14  | -2.25 |
| 8843 | c1cc(c([nH+]c1)CSC(=[NH2+])N)O          | C03877581 | -10.47 | -1.51 | -15.59 | 5.87  | 0.76  |
| 8844 | c1cc(=S)[nH]cc1Cl                       | C05426296 | -10.47 | -3.76 | -15.3  | 11.68 | -3.09 |
| 8845 | COC(=O)n1cccn1                          | C05526484 | -10.47 | 0.17  | -15.38 | 6.21  | -1.47 |
| 8846 | CCO[C@H]1OCCS1                          | C05718331 | -10.47 | -0.6  | -13.94 | 3.37  | 0.7   |
| 8847 | Cc1ccnc(c1)C                            | C08294954 | -10.47 | -1.16 | -9.27  | 3.08  | -3.12 |
| 8848 | c1c(c[nH]c(c=O)c1[N+](=O)[O-])Br        | C08698072 | -10.47 | -2.57 | -11.93 | 4.62  | -0.59 |
| 8849 | c1cnc(c(c1O)N)N(=O)[O-]O                | C12360011 | -10.47 | -3.45 | -18.02 | 8.42  | 2.57  |
| 8850 | c1cc(ncc1CC#N)Br                        | C15042693 | -10.47 | -2.9  | -12.89 | 8.66  | -3.35 |
| 8851 | Cc1cnc(nc1)Cl                           | C19091751 | -10.47 | 0.68  | -11.94 | 3.6   | -2.81 |
| 8852 | CNc1[nH]c(c=s)[nH]n1                    | C19476926 | -10.47 | -4.55 | -14.85 | 11.45 | -2.52 |
| 8853 | CC(=O)c1ccc(c(c1)F)F                    | C00152902 | -10.46 | -1.46 | -13.97 | 7.3   | -2.33 |
| 8854 | c1ccc2c(c1)NCS2                         | C00397013 | -10.46 | -1.59 | -9.83  | 3.54  | -2.58 |
| 8855 | c1(c(nsc1)Cl)C(=O)N)Cl                  | C00978058 | -10.46 | -2.86 | -12.21 | 4.46  | 0.15  |
| 8856 | CCCC=O                                  | C01529195 | -10.46 | -0.4  | -11.7  | 3.62  | -1.98 |
| 8857 | C1[C@H]2C=C[C@H]2CC1=O                  | C01570420 | -10.46 | -1.05 | -9.14  | 3.03  | -3.29 |
| 8858 | c1c(=O)[nH]c(c=O)n(n1)C/C=C/O           | C01647361 | -10.46 | -0.75 | -19.51 | 6.97  | 2.84  |
| 8859 | CCOC(=S)SC                              | C01665538 | -10.46 | -0.78 | -10.91 | 3.89  | -2.66 |
| 8860 | C=C(C)C(C)C(F)(F)F)Br                   | C01673696 | -10.46 | 2.63  | -14.7  | 3.36  | -1.75 |
| 8861 | CC(=O)O[C@H]1CC(=O)OC1                  | C04283640 | -10.46 | 1.1   | -15.51 | 6.68  | -2.73 |
| 8862 | c1cc2nncn2nc1NN                         | C04785566 | -10.46 | -5.57 | -13.68 | 10.63 | -1.85 |
| 8863 | Cc1c(=O)nc([nH]n1)NC                    | C05009525 | -10.46 | -4.88 | -11.38 | 6.87  | -1.07 |
| 8864 | Cc1c(c([nH]n1)C(F)(F)F)Cl               | C08996181 | -10.46 | -1.38 | -9.08  | 2.32  | -2.32 |
| 8865 | c1c[nH]c2c1[nH]cnc2=O                   | C12504135 | -10.46 | -2.48 | -18.21 | 11.21 | -0.98 |
| 8866 | c1(nc(nc(n1)N)N)N(=O)[N-]N(=[N+]=[N-])N | C13763906 | -10.46 | -2.5  | -10.15 | 3.09  | -0.9  |
| 8867 | Cc1ccc(cc1)n2c(nnn2)N                   | C16953783 | -10.46 | -0.25 | -15.55 | 9.08  | -3.75 |
| 8868 | Cc1nc(nn1)C)N                           | C17024971 | -10.46 | -1.77 | -13.31 | 7.01  | -2.38 |
| 8869 | c1cc(nc(c1)N)C(F)(F)F                   | C19616464 | -10.46 | -4.97 | -9.1   | 5.42  | -1.81 |
| 8870 | C#CCN[C@@H]1CCSC1                       | C19875380 | -10.46 | 0.98  | -11.82 | 2.87  | -2.49 |
| 8871 | C1[C@H](C)C1(C)Cl)C(=O)Cl               | C20357969 | -10.46 | -0.65 | -9.36  | 2.84  | -3.29 |
| 8872 | c1cc(ccc1CO)O                           | C21994423 | -10.46 | 1.25  | -18.43 | 6.26  | 0.46  |
| 8873 | Cc1nccc(n1C)N(=O)[O-]                   | C00001307 | -10.45 | -3.51 | -8.76  | 5.9   | -4.09 |
| 8874 | Cc1c(nnc(n1)N)C                         | C00154796 | -10.45 | -2.51 | -12.59 | 6.19  | -1.54 |
| 8875 | c1c(csc1CO)Br                           | C00159064 | -10.45 | -3.05 | -9.49  | 3.24  | -1.15 |
| 8876 | Cc1ccc(cc1N=C=O)F                       | C00164861 | -10.45 | -0.68 | -10.4  | 2.41  | -1.78 |
| 8877 | C1COCCN1C#N                             | C00407026 | -10.45 | -0.01 | -11.34 | 4.08  | -3.18 |
| 8878 | COC(=O)/C=C/N)C(=O)N                    | C01604054 | -10.45 | -2.67 | -16.83 | 7.38  | 1.68  |
| 8879 | Cn1c2c(cncn2)cn1                        | C01718409 | -10.45 | -2.51 | -11.13 | 6.14  | -2.96 |
| 8880 | Cc1ccc(o1)CC=O                          | C01762800 | -10.45 | -1.72 | -11.35 | 6.16  | -3.54 |
| 8881 | C[C@H](C)C(C)Cl)O                       | C01762873 | -10.45 | -0.82 | -10.12 | 1.36  | -0.87 |
| 8882 | CCCON                                   | C02388227 | -10.45 | -1.92 | -10.05 | 1.83  | -0.31 |
| 8883 | C[C@H](CCC(=O)C)O                       | C02526567 | -10.45 | 1.3   | -15.98 | 3.73  | 0.51  |
| 8884 | CC1CCC(=O)CC1                           | C03861284 | -10.45 | -0.88 | -9.58  | 3.32  | -3.32 |
| 8885 | Cc1cnc(n1)C)Br                          | C04352757 | -10.45 | -1.04 | -11.08 | 4.82  | -3.15 |
| 8886 | C/C(=N)NC(=O)N)C(F)(F)F                 | C04897004 | -10.45 | -1.71 | -14.1  | 4.82  | 0.53  |
| 8887 | C(CC#N)CN=N)N(=O)[O-]                   | C04984167 | -10.45 | -1.71 | -14.41 | 6.99  | -1.33 |
| 8888 | C(OC(F)(F)F)F                           | C05178907 | -10.45 | -1.72 | -10.74 | 2.85  | -0.84 |
| 8889 | Cc1c(nc(nn1)S)O                         | C11914473 | -10.45 | -4.36 | -13.35 | 5.41  | 1.85  |
| 8890 | Cn1c(cnc1[N+](=O)[O-])C(=O)OC           | C13282292 | -10.45 | -0.72 | -10.06 | 5.49  | -5.17 |
| 8891 | CC(C)N)H2+CC(F)(F)F                     | C19263191 | -10.45 | -0.15 | -10.22 | 1.67  | -1.74 |
| 8892 | CNc1ccc(cn1)C#N                         | C19487183 | -10.45 | -1.47 | -12.05 | 5.17  | -2.09 |
| 8893 | #CCOCc1ccc(cc1)Br                       | C19510323 | -10.45 | 0.76  | -10.47 | 3.74  | -4.5  |
| 8894 | c1cc([nH]c1)CO                          | C22011165 | -10.45 | -4.24 | -13.25 | 6.82  | 0.23  |
| 8895 | c1cc2c(cc1C)nn[nH]2                     | C32600123 | -10.45 | -2.46 | -13.35 | 7.51  | -2.16 |
| 8896 | CCCCc1ccccc1                            | M1995A047 | -10.45 | -0.64 | -5.33  | 1.17  | -5.65 |
| 8897 | Cc1c([nH]c(=O)[nH]c1=O                  | C00157062 | -10.44 | -4.5  | -15.93 | 9.68  | 0.31  |
| 8898 | c1ccc(cc1)C[C@@H](C2c2c(nnn2)N)O        | C00368799 | -10.44 | -1.17 | -17.18 | 8.53  | -0.63 |
| 8899 | Cc1c(cc(cc1O)O)O                        | C00394377 | -10.44 | -2.45 | -15.15 | 4.79  | 2.37  |
| 8900 | c1cc(ccc1)F)C(=O)N                      | C00406944 | -10.44 | -2.31 | -12.73 | 5.51  | -0.92 |
| 8901 | CC(=O)CCCCI                             | C01586735 | -10.44 | -0.53 | -12    | 5.22  | -3.13 |
| 8902 | C(=O)c1c(c(c(c1F)F)F)F                  | C01627094 | -10.44 | -2.08 | -8.25  | 3.73  | -3.84 |
| 8903 | CCN(C)N(=[N+]=[O-])O                    | C01668618 | -10.44 | -1.43 | -12.24 | 5.92  | -2.69 |
| 8904 | C(CO)CBr                                | C02031639 | -10.44 | -2.46 | -10.61 | 2.75  | -0.12 |
| 8905 | CO[C@H](C(F)F)O                         | C02040621 | -10.44 | -1.87 | -11.27 | 2.43  | 0.27  |
| 8906 | COC(=O)CSCC#N                           | C02169247 | -10.44 | -1.68 | -12.93 | 7.73  | -3.56 |

|      |                               |           |        |       |        |       |       |
|------|-------------------------------|-----------|--------|-------|--------|-------|-------|
| 8907 | c1nc([nH]n1)/N=C(/CC1)[O-]    | C03099659 | -10.44 | -0.69 | -18.81 | 9.11  | -0.04 |
| 8908 | Cc1nc(cs1)C#N                 | C03190898 | -10.44 | -2.39 | -13.56 | 8.2   | -2.69 |
| 8909 | CC(=O)CC(=O)n1cncn1           | C03203246 | -10.44 | -3.77 | -13.28 | 8.46  | -1.85 |
| 8910 | C=C=OCCCO                     | C05377559 | -10.44 | -1.41 | -13.42 | 3.77  | 0.63  |
| 8911 | C1CC(=O)O[C@H]1CCl            | C05413209 | -10.44 | -0.68 | -16.37 | 7.5   | -0.89 |
| 8912 | C1CCNC(=O)[C@H](C1)Cl         | C05566898 | -10.44 | 2.22  | -15.36 | 4.02  | -1.32 |
| 8913 | CO[C@H]1C=O                   | C05734707 | -10.44 | -1.59 | -14.34 | 3.5   | 1.99  |
| 8914 | c1cc(ccc1C(=S)N)Cl            | C05839325 | -10.44 | -1.69 | -14.27 | 8.67  | -3.15 |
| 8915 | CNC(=S)NCC(=O)C(F)F           | C07058659 | -10.44 | -0.05 | -18.34 | 9.22  | -1.27 |
| 8916 | C1CCNC(=O)[C@H](C1)Br         | C09256648 | -10.44 | 2.39  | -15.43 | 3.98  | -1.38 |
| 8917 | CCOc1ccc(c1F)[N+](=O)[O-]     | C12471368 | -10.44 | -1.5  | -10.67 | 5.79  | -4.06 |
| 8918 | c1cc(ccc1NC(=S)NN)Cl          | C13684747 | -10.44 | -1.06 | -9.8   | 3.13  | -2.71 |
| 8919 | c1c(cc(c2c1[nH]nc2O)F)F       | C14983968 | -10.44 | -1.99 | -14    | 4.64  | 0.9   |
| 8920 | C/C(=[NH+]/N)/N               | C16082795 | -10.44 | -2.72 | -11.83 | 3.5   | 0.62  |
| 8921 | C(CC)OCC(F)F                  | C16158943 | -10.44 | -1.78 | -10.51 | 4.36  | -2.51 |
| 8922 | CCc1c(non1)N                  | C16752464 | -10.44 | -2.84 | -14.41 | 7.58  | -0.78 |
| 8923 | COc1nc(non1)C=O               | C16944199 | -10.44 | -2.87 | -15.41 | 7.24  | 0.59  |
| 8924 | c1ccnc(c1)CNCC(F)F            | C19481082 | -10.44 | -1.24 | -12.16 | 5.07  | -2.1  |
| 8925 | COc(=O)[C@H](CF)Br            | C19735921 | -10.44 | -0.93 | -10.09 | 3.43  | -2.84 |
| 8926 | c1ccc2c(c1)ncn2O              | C25559332 | -10.44 | -4.26 | -13.46 | 9.64  | -2.36 |
| 8927 | c1c(nc(c1Br)Cl)C#N            | C29753708 | -10.44 | -1.49 | -9.18  | 3.34  | -3.1  |
| 8928 | c1ccc2c(c1)nnn2Cl             | C01731575 | -10.43 | 2.03  | -14.83 | 4.97  | -2.6  |
| 8929 | c1ccc2c(c1)ccs2=O             | C01735943 | -10.43 | -2.53 | -13.57 | 8.13  | -2.47 |
| 8930 | c1[nH]c2c(n1)c(ncn2)NN        | C02383126 | -10.43 | -0.68 | -15.81 | 7.68  | -1.61 |
| 8931 | C[C@H](CC#C)O                 | C02504416 | -10.43 | -1.3  | -11.7  | 3.16  | -0.6  |
| 8932 | Cc1c(ccc1)C#N                 | C02537519 | -10.43 | -0.54 | -13.32 | 6.13  | -2.7  |
| 8933 | Cc1c(ccc1Cl)F                 | C02540184 | -10.43 | -0.84 | -11.15 | 2.49  | -0.94 |
| 8934 | c1cc(oc1)Cn2c(ccn2)N          | C03426796 | -10.43 | 0.49  | -15.63 | 7.09  | -2.38 |
| 8935 | c1ccc2c(nc1)nc(o2)Cl          | C03880831 | -10.43 | -1.96 | -15.52 | 8.85  | -1.81 |
| 8936 | c1ccc(sc1)/C=N/N(=O)N         | C04538806 | -10.43 | 0.12  | -19.13 | 8.67  | -0.09 |
| 8937 | C=C/C=N/NC(=O)N               | C06261988 | -10.43 | -3.96 | -14.9  | 6.06  | 2.36  |
| 8938 | CC1c(ccc1F)Br                 | C15443750 | -10.43 | -1.12 | -9.93  | 3.41  | -2.79 |
| 8939 | c1cc(ccc1Cl)Nc2nc([nH]n2)N    | C15924287 | -10.43 | 0.71  | -13.12 | 7.2   | -5.21 |
| 8940 | C1CN=[C@H]1C(=O)C=[N+]=[N-]   | C17375770 | -10.43 | -0.48 | -20.23 | 8.39  | 1.89  |
| 8941 | c1ccc2c(nc1)nc(o2)N           | C20136404 | -10.43 | -4.2  | -17.62 | 10.45 | 0.93  |
| 8942 | Cn1c(=O)[nH]nc1OC             | C22013429 | -10.43 | -2.81 | -14.99 | 6.23  | 1.14  |
| 8943 | C1CCC(=C(C1)[N+](=O)[O-])O    | C25695929 | -10.43 | 0.57  | -14.07 | 6.42  | -3.35 |
| 8944 | CCOC(=O)N(C)OC                | C00389791 | -10.42 | -1.5  | -11.97 | 4.57  | -1.53 |
| 8945 | c1c(nc(=O)[nH]c1F)N           | C00967447 | -10.42 | -4.62 | -16.29 | 8.82  | 1.67  |
| 8946 | C1(=NC(=O)N=C1[NH-])(C(=O)N   | C01723627 | -10.42 | -3.05 | -20.15 | 7.61  | 5.17  |
| 8947 | COc(=O)C=O                    | C01845566 | -10.42 | -2.86 | -12.66 | 7.08  | -1.99 |
| 8948 | CC(C)CC(=O)Cl                 | C02015931 | -10.42 | -0.65 | -11.03 | 2.5   | -1.23 |
| 8949 | c1nnc(o1)OCC#N                | C02381232 | -10.42 | -3.4  | -17.31 | 7.59  | 2.7   |
| 8950 | c1cc2c(cc1F)sc(n2)Cl          | C02455703 | -10.42 | -1.29 | -11.48 | 2.43  | -0.08 |
| 8951 | Cc1ccc(o1)CCC=C               | C02518858 | -10.42 | -1.18 | -9.53  | 2.49  | -2.2  |
| 8952 | c1cc(ccc1F)CNC(=O)NF          | C03631554 | -10.42 | 0.94  | -21.34 | 10.4  | -0.42 |
| 8953 | c1cc(ccc1/C(=C/C(=O)[O-])F    | C03887805 | -10.42 | -4.49 | -10.43 | 6.47  | -1.97 |
| 8954 | C1C=CC=CCC1O                  | C05004691 | -10.42 | -0.83 | -12.56 | 1.93  | 1.04  |
| 8955 | CC[C@H](C#CC)O                | C05227164 | -10.42 | 0.23  | -11.63 | 2.56  | -1.59 |
| 8956 | CN1C(=O)CNC1=O                | C05965961 | -10.42 | -2.88 | -15.35 | 7.04  | 0.77  |
| 8957 | COC(=S)Nc1ccccc1              | C06379025 | -10.42 | 0.88  | -16.46 | 7.67  | -2.5  |
| 8958 | COCCNc1[nH]ncn1               | C08206217 | -10.42 | -0.98 | -16.91 | 5.54  | 1.92  |
| 8959 | C[C@H](Cc1ncnc1)O             | C12397659 | -10.42 | -4.08 | -11.44 | 4.86  | 0.25  |
| 8960 | CC(=O)Oc1ccc[nH]c1=O          | C17000747 | -10.42 | -0.52 | -18.95 | 9.4   | -0.34 |
| 8961 | [H]/N=C(C(F)(F)F)OCC(F)F      | C17005395 | -10.42 | -2.83 | -10.4  | 3.17  | -0.35 |
| 8962 | COCc1nc(on1)CCl               | C21953353 | -10.42 | -1.32 | -12.87 | 4.72  | -0.95 |
| 8963 | CC(=O)c1ccc(s1)Br             | C00096540 | -10.41 | -0.43 | -13.24 | 3.19  | 0.07  |
| 8964 | Cc1cncc1C#N                   | C00330972 | -10.41 | -2.1  | -10    | 4.33  | -2.64 |
| 8965 | CC(=O)Nc1ncccn1               | C00397441 | -10.41 | -2.92 | -13.93 | 9.14  | -2.7  |
| 8966 | Cc1cncc1CO                    | C01435953 | -10.41 | -1.82 | -12.87 | 4.74  | -0.45 |
| 8967 | Cc1nnc2n1ncs2                 | C01657455 | -10.41 | -1.08 | -17.19 | 10.41 | -2.54 |
| 8968 | c1c(c(=O)[nH]c(=O)[nH]1)C(F)F | C01713949 | -10.41 | -5.35 | -14.12 | 8.93  | 0.13  |
| 8969 | C[C@H]1(CO1)C=C               | C02044857 | -10.41 | -0.4  | -11.53 | 2.84  | -1.32 |
| 8970 | c1cc(ccc1O)[N+](=O)[O-]       | C02525422 | -10.41 | -4.75 | -12.27 | 8.37  | -1.76 |
| 8971 | c1coc(n1)C=O                  | C02530178 | -10.41 | -2.42 | -16.05 | 7.98  | 0.08  |
| 8972 | C1COc(=O)[C@H]1Br             | C03860233 | -10.41 | -1.52 | -11.94 | 5.55  | -2.5  |
| 8973 | [H]/N=C(C(=O)N)OC=C(C)C       | C05187801 | -10.41 | -1.98 | -17.27 | 7.23  | 1.6   |
| 8974 | CC(=O)CSc1nnn1C               | C05480863 | -10.41 | -0.39 | -16.25 | 7.55  | -1.33 |
| 8975 | CCNC(=S)[S-]                  | C05650405 | -10.41 | -2.08 | -12.09 | 1.75  | 2.01  |
| 8976 | c1ccc2c(c1)[nH]c(n2)CB        | C13284914 | -10.41 | -3.68 | -8.99  | 5.94  | -3.67 |
| 8977 | C[C@H](COC(F)F)O              | C16159291 | -10.41 | -2.41 | -11.17 | 2.82  | 0.35  |
| 8978 | c1cc(c(nc1)/C=N/O)O           | C17355132 | -10.41 | -1.85 | -17.02 | 7.11  | 1.35  |
| 8979 | c1cc(nc(c1N)N)C(F)F           | C26461755 | -10.41 | -6.83 | -10.68 | 7.42  | -0.33 |
| 8980 | Cc1ccc(c(c1)N)OCC=C           | C32006204 | -10.41 | -2.32 | -8.2   | 3.21  | -3.1  |
| 8981 | c1ccc(cc1Cl)OCC(F)F           | C00153363 | -10.4  | -1.98 | -8.55  | 2.19  | -2.07 |
| 8982 | COc1ccc(c1)N                  | C00157624 | -10.4  | -1.61 | -9.96  | 3.15  | -1.99 |
| 8983 | Cc1cncc([nH]c1=O)CS           | C00330944 | -10.4  | -2.92 | -12.76 | 7.21  | -1.93 |
| 8984 | C/C(=N/N)/C(=C)NN             | C01570042 | -10.4  | -0.85 | -13.36 | 3.01  | 0.8   |
| 8985 | c1ccc(c(c1N)O)O               | C01598464 | -10.4  | -3.51 | -15.89 | 5.59  | 3.42  |
| 8986 | C(C(C#N)(Cl)Cl)Cl             | C01641016 | -10.4  | 0.47  | -10.25 | 2.44  | -3.06 |
| 8987 | C[C@H](C(F)(F)F)O             | C02040700 | -10.4  | -1.95 | -10.62 | 2.21  | -0.03 |
| 8988 | C(CP)C#N                      | C02560453 | -10.4  | -2.01 | -10.57 | 4.06  | -1.86 |
| 8989 | C[C@H](C(C(F)F)F)O            | C02584331 | -10.4  | -0.8  | -10.66 | 1.95  | -0.88 |
| 8990 | C1CSC(=O)NC1=O                | C03102095 | -10.4  | 0.78  | -17.94 | 6.63  | 0.12  |
| 8991 | C1COCC[C@H]1C=O               | C04979101 | -10.4  | -1.24 | -12.91 | 4.66  | -0.92 |
| 8992 | CC1=NOC(=O)C12CC2             | C05080409 | -10.4  | -0.36 | -13.71 | 7.05  | -3.38 |
| 8993 | CCSCC#N                       | C19870242 | -10.4  | 0.47  | -12.61 | 5.28  | -3.55 |
| 8994 | COc1nc(on1)CCl                | C21953090 | -10.4  | 0.01  | -15.81 | 5.88  | -0.47 |
| 8995 | Cc1nc(on1)N                   | C32625168 | -10.4  | -4.57 | -13.77 | 6.65  | 1.3   |
| 8996 | c1cc(oc1)C(=O)NN              | C00153131 | -10.39 | -1.42 | -15.94 | 6.65  | 0.33  |

|      |                                  |           |        |       |        |       |       |
|------|----------------------------------|-----------|--------|-------|--------|-------|-------|
| 8997 | COC(=O)Cc1ccc(cc1)C#N            | C00257225 | -10.39 | -1.59 | -10.19 | 5.84  | -4.45 |
| 8998 | CCc1c(cc(=O)[nH]c1=O)N           | C00401339 | -10.39 | -4.53 | -14.75 | 9.6   | -0.71 |
| 8999 | c1c2c(cs1)OCCO2                  | C00403256 | -10.39 | -1.16 | -13.39 | 3.49  | 0.66  |
| 9000 | C=C1COOC(=C)CO1                  | C01684621 | -10.39 | -1.2  | -11.26 | 3.11  | -1.05 |
| 9001 | Cc1ccnc(n1)SC#N                  | C01698027 | -10.39 | -0.69 | -14.7  | 5.88  | -0.87 |
| 9002 | CN(C)C(=S)[O-]                   | C02557686 | -10.39 | -0.86 | -14.02 | 4.33  | 0.16  |
| 9003 | CC/C=C/C[C@H](C)O                | C04283840 | -10.39 | -3.14 | -7.1   | 1.7   | -1.86 |
| 9004 | Cc1[nH]c(c(n1)Cl)[N+](=O)[O-]    | C04632347 | -10.39 | -2.48 | -10.58 | 5.95  | -3.28 |
| 9005 | C/C=C/C=O                        | C04726476 | -10.39 | -1.16 | -12.38 | 4.43  | -1.28 |
| 9006 | c1(c(nH)n1)BrBr                  | C04771904 | -10.39 | -0.72 | -14.91 | 3.35  | 1.89  |
| 9007 | c1ccc(cc1)S(=O)=O                | C06581647 | -10.39 | -2.04 | -15.14 | 7.36  | -0.56 |
| 9008 | c1c(c([nH]n1)N)C(=S)N            | C06658020 | -10.39 | -5.71 | -14.12 | 8.65  | 0.78  |
| 9009 | c1c[nH]c(=O)cc1[O-]              | C08637458 | -10.39 | -2.86 | -15.87 | 5.19  | 3.15  |
| 9010 | c1cc(c(cc1O)OC(F)F)F             | C12359285 | -10.39 | 0.85  | -13.86 | 3.88  | -1.24 |
| 9011 | [C@H](C(F)F)F(OC(F)F)Cl)Cl       | C14628421 | -10.39 | -0.59 | -8.71  | 1.22  | -2.31 |
| 9012 | c1cc(oc1)/C=N/NC(=O)N            | C17146950 | -10.39 | -0.59 | -19.14 | 8.88  | 0.46  |
| 9013 | C1CS[C@H](N1)C(F)F               | C19441091 | -10.39 | -1.38 | -10.55 | 2.65  | -1.11 |
| 9014 | c1cc(ccc1C(=O)N=[N+]=[N-])Cl     | C19872840 | -10.39 | 0.7   | -13.06 | 2.73  | -0.77 |
| 9015 | c1cc(c(c1N)CO)F                  | C21985431 | -10.39 | -4.05 | -14.85 | 8.24  | 0.27  |
| 9016 | c1cncoc1NC=O                     | C23993715 | -10.39 | -2.61 | -16.38 | 9.27  | -0.66 |
| 9017 | #CCc1c2ccccc2nn1                 | C00135742 | -10.38 | 1.55  | -15.97 | 7.49  | -3.46 |
| 9018 | c1c(c(n1)CC#N)I                  | C01432444 | -10.38 | -0.23 | -15.93 | 8.9   | -3.12 |
| 9019 | C=CCNC(=O)C=C                    | C01577262 | -10.38 | -0.64 | -13.67 | 5.31  | -1.38 |
| 9020 | CCCCC#N                          | C01587817 | -10.38 | -1.77 | -9.41  | 4.51  | -3.7  |
| 9021 | CC(=O)CCc1ccccc1O                | C01672065 | -10.38 | -1.77 | -13.4  | 4.89  | -0.1  |
| 9022 | c1ccc(cc1)C(=O)C(F)F             | C01708231 | -10.38 | 0.89  | -13.91 | 4.82  | -2.18 |
| 9023 | c1cc(ccc1C(=O)C=O)O              | C01728403 | -10.38 | 0.97  | -19.62 | 9.96  | -1.69 |
| 9024 | [C@H]1CC[C@@H](C1)O              | C02242640 | -10.38 | -1.53 | -9.61  | 1.71  | -0.96 |
| 9025 | c1cc(c(cc1C=O)OC(F)F)            | C02532881 | -10.38 | -1.76 | -15.59 | 8.21  | -1.24 |
| 9026 | Cc1c(c(nHn1)C)N=O                | C04644856 | -10.38 | -0.06 | -15.26 | 5.71  | -0.76 |
| 9027 | CNC(=S)C#N                       | C05187276 | -10.38 | -1.94 | -11.66 | 2.75  | 0.47  |
| 9028 | CCOC(=O)/C(=N[O-])C(=O)C         | C12345800 | -10.38 | -1.71 | -14.87 | 8.14  | -1.94 |
| 9029 | CC(=O)NC1=NC(=O)CS1              | C12364192 | -10.38 | 1.79  | -19.02 | 7.09  | -0.25 |
| 9030 | c1cc(c(cc1N)Cl)SC#N              | C16385315 | -10.38 | -1.54 | -9.67  | 3.33  | -2.51 |
| 9031 | C1CCN(C1)CC#N                    | C19488582 | -10.38 | -0.94 | -12.57 | 4.5   | -1.36 |
| 9032 | CSCCC#N                          | C20232204 | -10.38 | 0.77  | -12.28 | 4.1   | -2.96 |
| 9033 | c1nc(n1)C=O                      | C20443641 | -10.38 | -3.32 | -15.5  | 7.98  | 0.47  |
| 9034 | c1cc(c(cc1F)[C@H]2CO2)F          | C22215711 | -10.38 | 0.41  | -11.48 | 3.43  | -2.75 |
| 9035 | c1cc2c(c[nH]c2nc1)C(F)F          | C32914955 | -10.38 | -5.45 | -7.97  | 6.57  | -3.53 |
| 9036 | c1ccc(c(c1)[C@@H](CO)O)Cl        | C00403281 | -10.37 | -5.52 | -9.72  | 4.93  | -0.06 |
| 9037 | CCSc1ccccc1                      | C01671802 | -10.37 | -1.7  | -11.8  | 3.34  | -0.22 |
| 9038 | COC(=O)OC                        | C01699944 | -10.37 | -0.85 | -11.91 | 3.82  | -1.44 |
| 9039 | C1CCC(C1)NC=O                    | C01702555 | -10.37 | -1.34 | -13.29 | 5.75  | -1.49 |
| 9040 | c1cc(c(cc1Cl)F)N=C=O             | C02509914 | -10.37 | 1.56  | -13.06 | 2.31  | -1.19 |
| 9041 | COC(=O)/C=C/C(=O)OC              | C03843378 | -10.37 | 0.31  | -12.59 | 4.54  | -2.63 |
| 9042 | CCOC(=O)c1ccccc1N                | C03861699 | -10.37 | -1.65 | -9.25  | 3.81  | -3.29 |
| 9043 | C=CCOC1ccccc1N                   | C04124227 | -10.37 | -1.27 | -11.85 | 2.66  | 0.1   |
| 9044 | C/C=C/C=N/NC(=O)N                | C04782860 | -10.37 | -2.49 | -15.06 | 6.69  | 0.49  |
| 9045 | C(C(C(F)F)F)F(O)O                | C05178437 | -10.37 | -5.39 | -9.61  | 3.26  | 1.38  |
| 9046 | C1C[C@@H](C1)OC1CS               | C05282940 | -10.37 | 0.17  | -13.86 | 2.55  | 0.78  |
| 9047 | CCc1ccc(o1)C=O                   | C06678069 | -10.37 | -1.85 | -10.72 | 4.02  | -1.82 |
| 9048 | CCc1nc(on1)[C@H](C)Cl            | C12505710 | -10.37 | -0.25 | -11.25 | 3.55  | -2.42 |
| 9049 | CCOC(=O)[C@H](C#C)O              | C12955464 | -10.37 | -2.11 | -11.33 | 4.47  | -1.39 |
| 9050 | Cc1cc(ncc1Br)F                   | C16159658 | -10.37 | -0.82 | -9.49  | 2.77  | -2.83 |
| 9051 | c1cc2c(c(c1)F)CC[C@H]2O          | C19727087 | -10.37 | -0.57 | -12.23 | 4.76  | -2.33 |
| 9052 | c1c(cnc(c1C#N)N)C#N              | C20436862 | -10.37 | -0.81 | -14.22 | 6.28  | -1.62 |
| 9053 | C1C=C[C@H](CO1)O                 | C22002567 | -10.37 | -1.92 | -13.2  | 4.01  | 0.74  |
| 9054 | CCN1CSCSC1                       | C32599205 | -10.37 | -1.31 | -9.13  | 2.13  | -2.06 |
| 9055 | c1cc(ccc1C=O)OC(F)F              | C00165235 | -10.36 | -0.29 | -13.09 | 5.52  | -2.5  |
| 9056 | Cc1cc(ccc1O)SC#N                 | C00409898 | -10.36 | -1.83 | -12.54 | 4.41  | -0.39 |
| 9057 | C([C@H](C(S)S)O)                 | C00901552 | -10.36 | -2.89 | -9.99  | 2.29  | 0.22  |
| 9058 | CC(C)CCNO                        | C01677567 | -10.36 | -2.77 | -10.03 | 2.3   | 0.15  |
| 9059 | Cc1[nH]c(c(n1)Cl)Cl              | C01756169 | -10.36 | -2.99 | -9.67  | 4.57  | -2.28 |
| 9060 | #CCCCCO                          | C01845543 | -10.36 | 0.47  | -12.54 | 2.87  | -1.16 |
| 9061 | c1cccc(c(c1)c2nsc(=O)o2)O        | C01849864 | -10.36 | 0.54  | -14.59 | 4.7   | -1.01 |
| 9062 | [C@H]1[C@H](C[N+](=O)[O-])O      | C02042096 | -10.36 | -1.74 | -13.69 | 5.74  | -0.66 |
| 9063 | c1cc(c(cc1C#N)Cl)O               | C02380632 | -10.36 | -1.21 | -13.5  | 4.73  | -0.39 |
| 9064 | Cc1cc(ccc1F)N=C=O                | C02585389 | -10.36 | -0.55 | -10    | 1.86  | -1.66 |
| 9065 | Cc1csc(n1)Br                     | C04198760 | -10.36 | -0.62 | -13.57 | 3.1   | 0.73  |
| 9066 | c1ccc(cc1)c2nc(nc(n2)N)N         | C04428660 | -10.36 | -1.28 | -11.56 | 7.12  | -4.64 |
| 9067 | [H]N=C(\C)/OCC                   | C04974301 | -10.36 | -0.78 | -12.86 | 2.64  | 0.62  |
| 9068 | C(=O)C(F)Cl                      | C05112661 | -10.36 | -0.21 | -12.72 | 4.09  | -1.53 |
| 9069 | [C@H]1/C(=N/O)CCO1               | C15022664 | -10.36 | -1.27 | -13.16 | 3.57  | 0.5   |
| 9070 | c1nc(c(c(n1)Cl)[N+](=O)[O-])[O-] | C17300083 | -10.36 | -2.31 | -13.44 | 5.16  | 0.23  |
| 9071 | C=CCNCC#N                        | C20033611 | -10.36 | -1.48 | -12.31 | 4.54  | -1.12 |
| 9072 | CN(C=O)OC                        | C21304109 | -10.36 | -1.36 | -12.98 | 4.54  | -0.56 |
| 9073 | COCc1cc([nH]n1)N                 | C26511567 | -10.36 | -0.97 | -16.87 | 7.27  | 0.21  |
| 9074 | CC(=O)[C@H]1CCOC1=O              | C00519771 | -10.35 | 0.68  | -15.6  | 6.98  | -2.42 |
| 9075 | CC(=O)NC(=O)/C(=N[O-])/C#N       | C01039313 | -10.35 | -4.04 | -19.7  | 13.38 | 0.01  |
| 9076 | Cn1cc(c(=O)[nH]c1=O)F            | C01639707 | -10.35 | -2.46 | -17.54 | 9.44  | 0.2   |
| 9077 | CCOC(=O)c1cc([nH]1)O             | C01653144 | -10.35 | -0.19 | -16.27 | 4.66  | 1.45  |
| 9078 | C1CCN(C1)C=O                     | C01675320 | -10.35 | 0.26  | -14.75 | 5.78  | -1.63 |
| 9079 | CCOC(=O)/C=C(\C)/Cl              | C01722721 | -10.35 | 0.36  | -11    | 1.93  | -1.63 |
| 9080 | [C@H]1[C@H](C(=O)C)Br            | C02031004 | -10.35 | -0.5  | -11.83 | 4.49  | -2.51 |
| 9081 | [C@H]1C=C(C(=O)O1)C              | C02031908 | -10.35 | -1.85 | -14.59 | 7.51  | -1.42 |
| 9082 | c1ccc2c(c1)C=C[C@H]2O            | C02032278 | -10.35 | -2.55 | -13.14 | 4.21  | 1.14  |
| 9083 | CC(=O)CBr                        | C02034519 | -10.35 | -0.84 | -12.45 | 4.98  | -2.04 |
| 9084 | C1CCC(=CC1)[N+](=O)[O-]          | C04528664 | -10.35 | -2.13 | -11.66 | 4.6   | -1.16 |
| 9085 | c1nnc2n1[nH]c(=S)n2N             | C04995303 | -10.35 | -2.28 | -19.67 | 8.43  | 3.16  |
| 9086 | Cc1ccnc(n1)NN=O                  | C06523327 | -10.35 | -0.04 | -13.92 | 5.74  | -2.13 |

|      |                                      |           |        |       |        |       |       |
|------|--------------------------------------|-----------|--------|-------|--------|-------|-------|
| 9087 | c1cc2c(nc1)sc(n2)N                   | C08251251 | -10.35 | -1.84 | -14.53 | 7.06  | -1.05 |
| 9088 | c1c2c([nH]c(=O)[nH]2)[nH]c(=S)n1     | C16970394 | -10.35 | -6.59 | -10.16 | 6.23  | 0.17  |
| 9089 | C(C(=O)C=N)OCl                       | C16972747 | -10.35 | -3.46 | -14.65 | 7.49  | 0.27  |
| 9090 | Cc1cccc1CON                          | C19733267 | -10.35 | 0.8   | -12.36 | 3.56  | -2.35 |
| 9091 | c1ccc(ccc1SC(F)F)Br                  | C20268463 | -10.35 | -0.29 | -7.83  | 2.6   | -4.84 |
| 9092 | CC(C)N=C(C)C                         | C31426676 | -10.35 | -0.85 | -9.31  | 1.98  | -2.17 |
| 9093 | c1(c([nH]c(=O)n1)Br)[O-]             | C32497008 | -10.35 | -1.47 | -19.1  | 4.32  | 5.89  |
| 9094 | c1ccc(cc1)OC(C(F)F)(F)F              | C00163973 | -10.34 | -0.51 | -11    | 3.99  | -2.83 |
| 9095 | CC1=COC(=O)[C@H]1C(=O)C              | C00501649 | -10.34 | -1.72 | -11.49 | 5.96  | -3.09 |
| 9096 | CCN1C(=O)C=CC1=O                     | C00901367 | -10.34 | 1.03  | -15.25 | 5.77  | -1.89 |
| 9097 | c1cncnc1c2csnn2                      | C01383115 | -10.34 | -2.81 | -12.58 | 6.93  | -1.88 |
| 9098 | CSC(=O)NCC=C                         | C01583570 | -10.34 | -1.21 | -10.59 | 3.41  | -1.95 |
| 9099 | C[C@H](CC)C#N                        | C01632615 | -10.34 | -0.48 | -10.47 | 3.44  | -2.83 |
| 9100 | C1(C(=O)NC(=O)NC1=O)Br               | C01716694 | -10.34 | 1.24  | -19.56 | 4.79  | 3.18  |
| 9101 | CC(=O)[C@H]1CCCC1=O                  | C01726108 | -10.34 | -0.59 | -11.68 | 4.75  | -2.82 |
| 9102 | CC#CC(=O)OC                          | C01765591 | -10.34 | -0.17 | -12.95 | 5.55  | -2.77 |
| 9103 | c1ccc(cc1)OC(=O)C(F)F                | C01846603 | -10.34 | -0.25 | -9.55  | 3     | -3.54 |
| 9104 | CC[C@H](C)OC                         | C02029845 | -10.34 | 0.08  | -10.68 | 1.19  | -0.93 |
| 9105 | C[C@@H](c1ccc(O)OC(=O)C              | C02389351 | -10.34 | -0.46 | -11.43 | 5.46  | -3.91 |
| 9106 | C[C@H](C(=O)C)SC                     | C03861605 | -10.34 | -1.35 | -11.58 | 5.41  | -2.82 |
| 9107 | c1c([n+](c2cn[nH]c2n1)[O-]           | C04772449 | -10.34 | -3.18 | -18.72 | 12.21 | -0.64 |
| 9108 | C1C(=O)NC(=O)N1                      | C05133259 | -10.34 | -6.13 | -14.28 | 4.71  | 5.36  |
| 9109 | CC(=O)CCS                            | C05196560 | -10.34 | -0.3  | -13.19 | 3.47  | -0.32 |
| 9110 | c1ccc(cc1O)CO                        | C06092100 | -10.34 | -1.23 | -18.04 | 5.06  | 3.88  |
| 9111 | c1cnc(c1C#N)Br                       | C12359347 | -10.34 | -3.14 | -8.75  | 4.2   | -2.65 |
| 9112 | c1c([nH]nc1N)C2CCC2                  | C12359806 | -10.34 | -3.73 | -9.38  | 4.61  | -1.84 |
| 9113 | [H]N=C(N)/SCc1c(ccc1F)F              | C12368553 | -10.34 | 0.32  | -12.55 | 4.6   | -2.71 |
| 9114 | CCOC(=O)c1csnc1C                     | C16124743 | -10.34 | 1.85  | -12.99 | 4.01  | -3.2  |
| 9115 | C[C@@H](CN/C(=N)/N(=O)[O-])/N        | C17300035 | -10.34 | -3.88 | -16.39 | 9.98  | -0.05 |
| 9116 | CCNC#N                               | C20033303 | -10.34 | -1.11 | -14.76 | 6.3   | -0.77 |
| 9117 | CCNC1cncs1                           | C20566285 | -10.34 | -2.26 | -9.36  | 4     | -2.72 |
| 9118 | CC(=O)C(C(=O)C)F                     | C22004319 | -10.34 | -1.35 | -12.76 | 5.8   | -2.02 |
| 9119 | C1=CC(=O)[C@H]2[C@H]1C(=O)C=C2       | C00158288 | -10.33 | 1.11  | -13.86 | 5.25  | -2.83 |
| 9120 | CCN(CC)C=O                           | C00388483 | -10.33 | -1.59 | -11.73 | 5.2   | -2.21 |
| 9121 | COC(=O)C1CCCC1                       | C00404439 | -10.33 | -1.86 | -11.45 | 6.92  | -3.94 |
| 9122 | CCCC(=O)CC                           | C01586745 | -10.33 | -0.27 | -12.09 | 3.52  | -1.5  |
| 9123 | CC[C@H](C)O                          | C01622055 | -10.33 | -0.97 | -10.59 | 1.61  | -0.39 |
| 9124 | c1ccc(cc1[N+](=O)[O-])Br             | C01666827 | -10.33 | -1.59 | -11.45 | 3.4   | -0.68 |
| 9125 | CN(C)C#N                             | C01688358 | -10.33 | -1.48 | -9.44  | 4.08  | -3.49 |
| 9126 | C/C=C/C(=O)C                         | C01716739 | -10.33 | -0.12 | -9.85  | 3.48  | -3.83 |
| 9127 | C/C=C/C(C)[C@H](C)O                  | C01730157 | -10.33 | -0.44 | -10.27 | 1.64  | -1.26 |
| 9128 | CC(C)N=C=S                           | C01841344 | -10.33 | 0.28  | -12.44 | 1.38  | 0.46  |
| 9129 | CC(=O)N(C)CCC#N                      | C02381335 | -10.33 | -1.4  | -15.38 | 8.74  | -2.29 |
| 9130 | c1c(cnc1Br)CO                        | C02507201 | -10.33 | -2.01 | -11.56 | 3.8   | -0.55 |
| 9131 | CCc1ccc(s1)C                         | C02510291 | -10.33 | -0.5  | -10.8  | 1.77  | -0.8  |
| 9132 | Cc1ccn(c(n1)N)Cl                     | C02537813 | -10.33 | -0.09 | -12.74 | 4.52  | -2.02 |
| 9133 | c1ccc2c(c1)CC(=C2)C#N                | C04273543 | -10.33 | -1.34 | -10.91 | 3.9   | -1.99 |
| 9134 | Cn1c(=O)cccc1Cl                      | C05423926 | -10.33 | -2.2  | -11.62 | 6.02  | -2.53 |
| 9135 | Cn1c(=O)[nH]c(=O)[nH]1               | C06072277 | -10.33 | -3.32 | -17    | 8.48  | 1.51  |
| 9136 | c1cc2c(cc1Br)nc[nH]2                 | C06667027 | -10.33 | -2.08 | -10.93 | 6.28  | -3.6  |
| 9137 | CCc1nc(on1)[C@@H](C)Cl               | C12505709 | -10.33 | 2.44  | -14.05 | 3.57  | -2.29 |
| 9138 | C/C=C/[C@@H](O)[C@H](O)/C=C/C        | C17046406 | -10.33 | -1.35 | -10.97 | 2.37  | -0.37 |
| 9139 | c1ccc(cc1)/C=C/C(=O)Cl               | C21304307 | -10.33 | 1.03  | -11.97 | 5.05  | -4.44 |
| 9140 | c1cnc(nc1)NCC(=O)N                   | C21517217 | -10.33 | -3.43 | -15.93 | 8.99  | 0.04  |
| 9141 | CC(C(=O)C)C(=O)N                     | C24717448 | -10.33 | -2.32 | -10.43 | 4.07  | -1.66 |
| 9142 | c1c(c(nc(=O)[nH]1)N)I                | C00967457 | -10.32 | -4.16 | -16.58 | 9.72  | 0.69  |
| 9143 | C1=CC(=O)OC1=C(C)Cl                  | C01581213 | -10.32 | -1.51 | -10.34 | 5.02  | -3.48 |
| 9144 | CCOC(=O)C(=C)Cl                      | C01608903 | -10.32 | -0.08 | -11.68 | 3.27  | -1.84 |
| 9145 | CCC(=O)c1cccnc1                      | C01663885 | -10.32 | -2.54 | -10.16 | 5.37  | -2.99 |
| 9146 | CCc1ncnc(=O)[nH]c1=O                 | C01696276 | -10.32 | -2.63 | -15.45 | 9.38  | -1.63 |
| 9147 | c1ccc(cc1)S(=O)(=O)NC#N              | C01703100 | -10.32 | -3.09 | -11.28 | 7.14  | -3.09 |
| 9148 | CC(=C/C=C/C(=O)C)C                   | C02018343 | -10.32 | 0.68  | -13.16 | 4.1   | -1.94 |
| 9149 | c1nnc(n1)N                           | C04152201 | -10.32 | -3.91 | -15.8  | 7.37  | 2.02  |
| 9150 | C(=O)(C(F)F)(F)F)N                   | C05177760 | -10.32 | -1.29 | -12.94 | 3.64  | 0.27  |
| 9151 | C=CCSC1=NCSS1                        | C05185842 | -10.32 | -0.4  | -14.45 | 2.87  | 1.66  |
| 9152 | c1cc(ccc1)Cl)C=N/O                   | C08637842 | -10.32 | -2.35 | -10.9  | 5.03  | -2.11 |
| 9153 | c1cc(sc1)C(=O)NO                     | C12504622 | -10.32 | -5.18 | -13.44 | 8.81  | -0.51 |
| 9154 | c1ccc(cc1)SCC=O                      | C19686055 | -10.32 | -1.45 | -9.39  | 4.59  | -4.08 |
| 9155 | CNc1cc(ccn1)Cl                       | C21303251 | -10.32 | -2.24 | -8.92  | 3.1   | -2.26 |
| 9156 | Cc1c[nH]c(n1)I                       | C01563468 | -10.31 | -1.97 | -13.44 | 4.24  | 0.87  |
| 9157 | COC(=O)CC(=O)C(=O)OC                 | C01621874 | -10.31 | -0.95 | -13.78 | 7.53  | -3.1  |
| 9158 | C[C@@H]1(CO1)C=C                     | C01679929 | -10.31 | -0.44 | -11.2  | 2.74  | -1.42 |
| 9159 | Cc1c(ccs1)Br                         | C01695822 | -10.31 | -0.55 | -11.43 | 1.66  | 0.01  |
| 9160 | COC(=O)NCCC                          | C01698370 | -10.31 | -0.2  | -14.92 | 5.24  | -2.42 |
| 9161 | CC1=CCOC1=O                          | C02015746 | -10.31 | -1.81 | -14.1  | 8.03  | -0.43 |
| 9162 | CC(C)ON                              | C02388228 | -10.31 | -1.57 | -10.34 | 1.89  | -0.29 |
| 9163 | c1nc(c(n1)C)N)N                      | C02523006 | -10.31 | -2.63 | -12.75 | 4.94  | 0.12  |
| 9164 | COC(=O)c1ccc(c[nH]1)C=O              | C02577863 | -10.31 | -1.23 | -13.74 | 6.74  | -2.09 |
| 9165 | CC[C@H](C)C(=O)Cl                    | C02584245 | -10.31 | 0.06  | -11.45 | 2.32  | -1.24 |
| 9166 | C[C@H]1CCCCO1                        | C05211760 | -10.31 | 0.24  | -11.74 | 1.27  | -0.08 |
| 9167 | CC(=C)OC1CCC1                        | C05283281 | -10.31 | 0.02  | -10.43 | 1.38  | -1.28 |
| 9168 | CCOC(=O)OCC(C(F)F)(F)F               | C15443008 | -10.31 | -0.22 | -9.34  | 3.2   | -3.94 |
| 9169 | C/C(=N)O)N/C(=N)O)/N                 | C16082792 | -10.31 | -5.14 | -17.03 | 7.78  | 4.08  |
| 9170 | c1c(c([nH]c1=O)C(=O)N=[N+]=[N-])[O-] | C17288490 | -10.31 | 0.33  | -21.07 | 5.49  | 4.94  |
| 9171 | c1c(nc[nH]1)C/C=C(C(=O)Cl            | C21987274 | -10.31 | 0.02  | -15.21 | 8.28  | -3.4  |
| 9172 | COCNC(=O)n1ccnc1                     | C32628597 | -10.31 | -0.66 | -15.77 | 7.96  | -1.83 |
| 9173 | c1cn(cn1)C(=O)NCC(F)(F)F             | C32628638 | -10.31 | -2.67 | -11.54 | 6.85  | -2.95 |
| 9174 | c1ccc(cc1N)C#N)O                     | C00331906 | -10.3  | -0.29 | -16.68 | 5.63  | 1.03  |
| 9175 | CC(=O)c1cccc1                        | C00896628 | -10.3  | -1.45 | -10.14 | 4.99  | -3.71 |
| 9176 | COc1ccc(cc1)N)O                      | C01304689 | -10.3  | -1.78 | -13.29 | 3.91  | 0.86  |

|      |                                 |           |        |       |        |       |       |
|------|---------------------------------|-----------|--------|-------|--------|-------|-------|
| 9177 | Cn1c(c(nn1)C(=O)N)N             | C01417949 | -10.3  | -5.46 | -13.99 | 6.79  | 2.36  |
| 9178 | C[C@@]12[C@@@H](O1)C(=O)C=CC2=O | C01559090 | -10.3  | 0.11  | -15.07 | 4.29  | 0.36  |
| 9179 | C/C=C/CCCO                      | C01601235 | -10.3  | -0.58 | -10.56 | 2.11  | -1.28 |
| 9180 | CCO[C@@@H](C(=O)OCC)O           | C01621875 | -10.3  | 0.39  | -13.85 | 4.59  | -1.43 |
| 9181 | CCCCC(=O)N                      | C01641410 | -10.3  | -0.03 | -9.95  | 1.94  | -2.26 |
| 9182 | CC[C@@H](C(=O)OCC)F             | C02147435 | -10.3  | -0.15 | -11.4  | 3.6   | -2.34 |
| 9183 | c1cc(c(cc1N)C(=O)Cl)F           | C02243176 | -10.3  | 0.56  | -14.46 | 5.66  | -2.07 |
| 9184 | CCC[C@@@H](C)O                  | C02504420 | -10.3  | -0.26 | -10.5  | 1.37  | -0.92 |
| 9185 | c1cc(c(cc1Br)F)CO               | C02512504 | -10.3  | -1.08 | -12.47 | 2.31  | 0.94  |
| 9186 | c1cc(ccc1NCCO)Cl                | C03210880 | -10.3  | -3.5  | -9.6   | 3.53  | -0.72 |
| 9187 | c1nc(c(n1C(=O)N)N(=O)[O-])      | C04125317 | -10.3  | -5.9  | -14.92 | 11.83 | -1.32 |
| 9188 | C1CCC(=NN)C1                    | C04887228 | -10.3  | -1.13 | -13.34 | 2.19  | 1.98  |
| 9189 | COc1ccc(cc1)/C=N/O              | C12341485 | -10.3  | -2.72 | -13.14 | 6.65  | -1.1  |
| 9190 | C1CC(=O)N(C1)N                  | C13550143 | -10.3  | -1.54 | -14.56 | 6.09  | -0.3  |
| 9191 | CCO[C@@@](C(F)F)(F)Br           | C14611376 | -10.3  | -1.46 | -8.61  | 2.24  | -2.47 |
| 9192 | C[C@@H](C(=N)O)N                | C16082781 | -10.3  | -3.9  | -13.93 | 4.36  | 3.17  |
| 9193 | C[C@@H](O)OC(F)F                | C16159295 | -10.3  | -1.79 | -12.12 | 3.35  | 0.26  |
| 9194 | c1cc(ccc1C(=O)N=C=O)Cl          | C19408021 | -10.3  | 1.56  | -13.42 | 2.86  | -1.3  |
| 9195 | c1(nc([nH]n1)N)C(=O)N           | C19505675 | -10.3  | -6.16 | -19.59 | 14.01 | 1.44  |
| 9196 | c1cnc(c1n2cncn2)N               | C20370479 | -10.3  | -0.72 | -13.25 | 6.57  | -2.91 |
| 9197 | COc1cc(c(n1nH)O)F               | C26896783 | -10.3  | -2.48 | -16.79 | 9.98  | -1.01 |
| 9198 | c1(c(c(c1F)F)O)F                | C00395548 | -10.29 | -1.74 | -13.26 | 3.92  | 0.8   |
| 9199 | c1ccc(cc1)[C@H](CNO)O           | C00397119 | -10.29 | -3.36 | -14.55 | 4     | 3.62  |
| 9200 | C=COCCNC=O                      | C01603470 | -10.29 | 0.33  | -17.16 | 6.48  | 0.06  |
| 9201 | CCN(CC)O                        | C01698912 | -10.29 | -1.25 | -11.02 | 2.07  | -0.08 |
| 9202 | Cc1c(ocn1)C#N                   | C02004545 | -10.29 | -1.74 | -13.05 | 4.87  | -0.37 |
| 9203 | C/C=C/C[C@H](C)O                | C02039433 | -10.29 | -0.71 | -10.15 | 1.41  | -0.83 |
| 9204 | C1CC(=O)C2=C1OCOC2              | C02149591 | -10.29 | -1.18 | -13.99 | 6.67  | -1.79 |
| 9205 | Cc1nnc(n1)N                     | C02511426 | -10.29 | -5.29 | -15.22 | 7.73  | 2.5   |
| 9206 | Cc1ccnc(n1)Cl                   | C02515987 | -10.29 | 0.53  | -13.47 | 5.02  | -2.36 |
| 9207 | c1cc2c(c1)cc([nH]2)N            | C02576352 | -10.29 | -2.96 | -12.93 | 4.2   | 1.4   |
| 9208 | C1CC(=C(C(=O)C1)Br)[O-]         | C03865375 | -10.29 | -1.35 | -13.74 | 6.33  | -1.53 |
| 9209 | c1(c(non1)NNc2c(non2)N)N        | C03898323 | -10.29 | -4.43 | -16    | 9.96  | 0.18  |
| 9210 | C1CN(NC1=O)C(=O)CCl             | C04038567 | -10.29 | 0.64  | -18.18 | 7.83  | -0.58 |
| 9211 | c1cc(c(c1)F)N=C=S)F             | C04255362 | -10.29 | 0     | -11.38 | 5.09  | -4    |
| 9212 | c1cnc(cn1)C(=O)NO               | C04429661 | -10.29 | 0.06  | -21.23 | 9.32  | 1.55  |
| 9213 | c1ccc(cc1)C(=O)/C=N/O           | C04536813 | -10.29 | -2.63 | -12.85 | 6.53  | -1.35 |
| 9214 | C[C@@@H](Cn1ccnc1)O             | C05115865 | -10.29 | -1.13 | -14.42 | 6.67  | -1.41 |
| 9215 | c1nc(no1)/C(=N)O/Cl             | C05705310 | -10.29 | -3.13 | -16.13 | 7.52  | 1.44  |
| 9216 | CS/C(=[NH+]/N=C(N)/[S-])/N      | C06259690 | -10.29 | -0.89 | -18.69 | 10.6  | -1.32 |
| 9217 | c1ccc2c(c1)nc(n2[O-])C#N        | C13219726 | -10.29 | -2.95 | -11.12 | 5.85  | -2.07 |
| 9218 | Cn1ccc(n1)C(=O)N                | C13466603 | -10.29 | -4.85 | -13.91 | 7.91  | 0.56  |
| 9219 | COc1cc(ccn1)C(F)F               | C19616188 | -10.29 | -0.45 | -11.05 | 3.07  | -1.86 |
| 9220 | c1cc(c(cc1Br)F)C#N              | C00155137 | -10.28 | -1.78 | -10.61 | 3.96  | -1.85 |
| 9221 | c1cc(c(cc1N)C(F)F)F             | C00164786 | -10.28 | -2.76 | -9.03  | 3.97  | -2.47 |
| 9222 | c1cc(sc1CC#N)Br                 | C00334102 | -10.28 | -3    | -12.7  | 6.31  | -0.88 |
| 9223 | CCOc1ccc(on1)[N+](=O)[O-]       | C00335039 | -10.28 | 2.3   | -14.09 | 3.75  | -2.24 |
| 9224 | CC(=O)OCC#N                     | C01555375 | -10.28 | -2.28 | -13.08 | 7.8   | -2.72 |
| 9225 | CNc1cc(ncn1)Cl                  | C01749496 | -10.28 | -1.67 | -13.85 | 3.85  | 1.39  |
| 9226 | CC(C#C)/C(=O)C                  | C02039894 | -10.28 | -0.5  | -11.82 | 3.7   | -1.66 |
| 9227 | c1cnc(nc1)SCC#N                 | C02171569 | -10.28 | -2.09 | -12.23 | 6.92  | -2.89 |
| 9228 | CC[C@@H](CC(=C)C)O              | C02508080 | -10.28 | -0.76 | -11.09 | 1.56  | 0.02  |
| 9229 | CN(C(=O)C(F)F)OC                | C02555201 | -10.28 | 1.66  | -13.87 | 3.37  | -1.44 |
| 9230 | Cc1c(ocn1)N                     | C03407837 | -10.28 | -2.06 | -14.06 | 4.96  | 0.89  |
| 9231 | C[C@H]1CCCCC1=O                 | C03860605 | -10.28 | 1.68  | -11.7  | 3.12  | -3.38 |
| 9232 | C1C(CSCS1)O                     | C05085555 | -10.28 | -1.09 | -10.95 | 2.38  | -0.62 |
| 9233 | C(Oc1c(non1)N)Oc2c(non2)N       | C05380685 | -10.28 | -4.52 | -17.5  | 8.19  | 3.55  |
| 9234 | C/C=C/[C@@@H]1OC[C@@H](O1)C     | C05539417 | -10.28 | 0.01  | -12.86 | 2.63  | -0.06 |
| 9235 | C1[C@@@H]2[C@@@H](CS1)OC(=O)O2  | C05574446 | -10.28 | 1.39  | -14    | 4.68  | -2.35 |
| 9236 | CNC(=O)OCC(F)F                  | C08037175 | -10.28 | -2.21 | -12.33 | 4.48  | -0.22 |
| 9237 | C([N])C[C@@H](F)Br              | C08698382 | -10.28 | -0.11 | -11.88 | 3.76  | -2.05 |
| 9238 | c1cnc(nc1)/C(=N)O/N             | C15828506 | -10.28 | -3.79 | -14.98 | 7.57  | 0.92  |
| 9239 | CC(=O)Nc1ccncc1                 | C16102283 | -10.28 | -1.19 | -15.29 | 7.47  | -1.27 |
| 9240 | c1cnn(c1)c2cncn2N               | C20370482 | -10.28 | -2.02 | -12.33 | 5.93  | -1.86 |
| 9241 | C1CCN(C(=O)C1)N                 | C21298954 | -10.28 | 0.07  | -14.78 | 5.31  | -0.88 |
| 9242 | C[C@@@H]1[C@H](C(=O)N)N=C=S     | C22141575 | -10.28 | -0.46 | -10.9  | 3.71  | -2.64 |
| 9243 | C[C@@@H]1CCOC1=O                | C00388119 | -10.27 | -0.48 | -13.11 | 5.81  | -2.49 |
| 9244 | Cc1ccc(s1)                      | C00403123 | -10.27 | -0.4  | -11.57 | 1.47  | 0.23  |
| 9245 | Cc1ccc(cc1Cl)O                  | C00407449 | -10.27 | -1.32 | -9.87  | 2.86  | -1.94 |
| 9246 | Cc1cc(=O)c(cc1)O                | C01395450 | -10.27 | -3.3  | -16.37 | 10.23 | -0.82 |
| 9247 | CCCCCO                          | C01687154 | -10.27 | -2.92 | -8.54  | 1.89  | -0.71 |
| 9248 | CCc1nnc(s1)Cl                   | C01701726 | -10.27 | -1.81 | -12.39 | 4.17  | -0.24 |
| 9249 | COc(=O)C1=CC=CC1                | C01730116 | -10.27 | 1.71  | -15    | 4.61  | -1.6  |
| 9250 | CCNOCC                          | C01756760 | -10.27 | -0.63 | -11.75 | 1.91  | 0.21  |
| 9251 | C1CC1C(C2CC2)O                  | C02162270 | -10.27 | -0.38 | -8.71  | 1.17  | -2.35 |
| 9252 | COc(=O)C(=O)c1cccc1             | C02166852 | -10.27 | -0.88 | -9.3   | 4.03  | -4.11 |
| 9253 | CNc1ccc(nn1)Cl                  | C02391440 | -10.27 | -1.4  | -12.92 | 5.55  | -1.5  |
| 9254 | c1c(ccc1Br)C=O                  | C02507202 | -10.27 | -0.25 | -13.06 | 5.41  | -2.37 |
| 9255 | Cc1c(non1)CCC=C                 | C02522331 | -10.27 | -0.13 | -13.41 | 6.21  | -2.94 |
| 9256 | CCO[P@@]1CC=C(C1)C              | C03957835 | -10.27 | 0     | -8.82  | 1.86  | -3.31 |
| 9257 | C1=CC(=O)N(C1=O)CCC#N           | C05372810 | -10.27 | 0.35  | -17.24 | 8.3   | -1.68 |
| 9258 | C([C@H]1C(=O)NC(=O)N1)S         | C05411549 | -10.27 | 0.29  | -17.1  | 5.12  | 1.41  |
| 9259 | CNC(=O)C(=O)N                   | C05700330 | -10.27 | -3.43 | -14.5  | 4.69  | 2.97  |
| 9260 | CC(=O)N(C=O)C=O                 | C06731774 | -10.27 | -2.55 | -17.76 | 12.01 | -1.97 |
| 9261 | c1cnc(c1)SCCO                   | C11535633 | -10.27 | -5.05 | -9.19  | 4.99  | -1.02 |
| 9262 | CCN/C(=[NH+](=O)[O-])/N         | C16033785 | -10.27 | -4.24 | -14.6  | 10.46 | -1.89 |
| 9263 | c1cc2c(nc1)SCC2                 | C19801135 | -10.27 | -1.95 | -11.3  | 6.22  | -3.23 |
| 9264 | c1cc(ccc1)F)CNC(=S)NN           | C20473713 | -10.27 | 0.42  | -18.35 | 10.43 | -2.76 |
| 9265 | CCC1=NN(C(=O)C1)C               | C26515269 | -10.27 | -0.55 | -14.54 | 6.69  | -1.86 |
| 9266 | CC(C)c1[n-]cc(n1)[N+](=O)[O-]   | C00157584 | -10.26 | -0.27 | -10.71 | 4.6   | -3.88 |

|      |                                       |           |        |       |        |       |       |
|------|---------------------------------------|-----------|--------|-------|--------|-------|-------|
| 9267 | c1cc(c(cc1O)C(F)F)F                   | C00164785 | -10.26 | -5.4  | -7.28  | 4.01  | -1.58 |
| 9268 | c1csc(c1[N+](=O)[O-])Cl               | C01513509 | -10.26 | -1.87 | -13.11 | 5.37  | -0.64 |
| 9269 | c1ccc(cc1)Nc2nc([nH]n2)N              | C01575013 | -10.26 | 2.94  | -18.22 | 9.91  | -4.89 |
| 9270 | CCCCSCC=C                             | C01587859 | -10.26 | -0.71 | -9.41  | 1.15  | -1.29 |
| 9271 | C[C@@H]1C[C@@H](C(=O)O1)Br            | C01592385 | -10.26 | -1.16 | -11.57 | 5.57  | -3.1  |
| 9272 | C(C[N+](=O)[O-])C(Cl)C                | C01758979 | -10.26 | -0.97 | -11.32 | 4.95  | -2.93 |
| 9273 | CC(=O)Nc1cc(cc(c1)F)F                 | C02243414 | -10.26 | -1.46 | -12.59 | 6.48  | -2.69 |
| 9274 | c1cc(c(cc1OC(F)F)F)Cl)N               | C02382405 | -10.26 | -0.6  | -11.08 | 1.96  | -0.55 |
| 9275 | c1cc(c(cc1C=O)F)Br                    | C02383961 | -10.26 | -0.49 | -10.68 | 4.55  | -3.64 |
| 9276 | Cc1cc(oc1C)C                          | C02518855 | -10.26 | -0.91 | -8.72  | 2.98  | -3.62 |
| 9277 | CO[C@H](C(C(F)F)F)F)O                 | C02579122 | -10.26 | -2.4  | -9.56  | 2.21  | -0.51 |
| 9278 | Cc1cc(ncn1)Cl                         | C02581590 | -10.26 | -2.01 | -11.54 | 3.32  | -0.03 |
| 9279 | C1C[C@@H](C=C)C@H]1O)O                | C03860563 | -10.26 | -1.99 | -13.36 | 3.67  | 1.42  |
| 9280 | C[C@H]1(C@H)1CCC(C@H)1O)O             | C05031337 | -10.26 | -0.69 | -11.3  | 2.39  | -0.66 |
| 9281 | c1[nH]c2c(n1)c(=O)n(c2)O              | C05425242 | -10.26 | -4.3  | -19.24 | 14.87 | -1.58 |
| 9282 | C1233855CC(=O)C=N/Nc1cccc1            | C12338552 | -10.26 | -0.72 | -11.12 | 5.13  | -3.55 |
| 9283 | c1c[nH]c2c1ncc(c2)Cl                  | C14401120 | -10.26 | -0.61 | -12.5  | 5.37  | -2.51 |
| 9284 | Cc1c(ccc(n1)N)Cl                      | C15423947 | -10.26 | -2.29 | -9.15  | 3.06  | -1.87 |
| 9285 | c1c(c(c(=O)[nH]n1)Cl)N                | C17300623 | -10.26 | -3.89 | -15.49 | 6.17  | 2.95  |
| 9286 | CCOC(=O)c1csc(n1)N                    | C18210877 | -10.26 | 1.25  | -12.21 | 2.89  | -2.18 |
| 9287 | c1cc(c(c(c1)F)C@H]2CO2)F              | C18344987 | -10.26 | -1.6  | -10.58 | 4.84  | -2.93 |
| 9288 | C[P@H](=O)OCc1cccc1                   | C21993426 | -10.26 | -1.81 | -12.48 | 7.49  | -3.46 |
| 9289 | C1[C@H](O1)CN2C(=O)CSC2=O             | C22223265 | -10.26 | -0.38 | -15.99 | 6.74  | -0.64 |
| 9290 | c1cnc(c(n1)CO)Cl                      | C32915065 | -10.26 | -2.13 | -15.93 | 6.74  | 1.07  |
| 9291 | COc1ccnc(n1)N                         | C00332004 | -10.25 | -0.47 | -13.66 | 4.27  | -0.39 |
| 9292 | C1CCN(CC1)C#N                         | C00407019 | -10.25 | 1.66  | -10.57 | 3.54  | -4.89 |
| 9293 | C1[C@H](OC1)Cl                        | C01622487 | -10.25 | 0.03  | -9.57  | 2.06  | -2.77 |
| 9294 | CC(=O)CCC#N                           | C01653073 | -10.25 | 0.2   | -14.24 | 5.97  | -2.18 |
| 9295 | C1=CC(=O)C=CC1=NBr                    | C01762858 | -10.25 | 1.65  | -12.96 | 3.71  | -2.65 |
| 9296 | COc1cccc1                             | C05701055 | -10.25 | -0.99 | -10.05 | 1.65  | -0.86 |
| 9297 | C[C@H]1N=NNN1C                        | C06481676 | -10.25 | -1.43 | -13.28 | 2.59  | 1.86  |
| 9298 | c1csc(c1)P@H](=O)O                    | C06599421 | -10.25 | -5.57 | -12.23 | 8.04  | -0.48 |
| 9299 | c1cc(c(cc1O)O)CCO                     | C13340461 | -10.25 | -2.5  | -14.98 | 4.99  | 2.25  |
| 9300 | C1[C@H]2[C@@H]1CC(C2)O                | C16698377 | -10.25 | -2.35 | -8.88  | 2.06  | -1.08 |
| 9301 | C(=C)SC#N(C=O)N                       | C16955772 | -10.25 | -0.75 | -16.68 | 6.86  | 0.32  |
| 9302 | Cc1ccc(o1)C(=O)N=[N+]=[N-]            | C17108604 | -10.25 | -0.56 | -14.2  | 4.18  | 0.33  |
| 9303 | C/N=C(C#N)/C1CCCC1                    | C17174700 | -10.25 | 0.43  | -10.6  | 2.69  | -2.77 |
| 9304 | C[C@H]1C=C(C(=O)O1)CO                 | C17299098 | -10.25 | -3.07 | -13.36 | 6.77  | -0.58 |
| 9305 | CC[C@@H]1[C@H](O)C                    | C19260482 | -10.25 | -0.36 | -10.9  | 2.75  | -1.74 |
| 9306 | c1ccc(c(c1)C)C(F)F                    | C19729345 | -10.25 | -0.29 | -12.95 | 5.27  | -2.28 |
| 9307 | c1ccc(c(c1)C)C(=O)O                   | C19730647 | -10.25 | 1.34  | -11.95 | 3.11  | -2.75 |
| 9308 | CC(=O)COC(C(F)F)F                     | C20439919 | -10.25 | -1.04 | -11.58 | 4.8   | -2.43 |
| 9309 | Cc1ccc([nH]c1)NC                      | C21505277 | -10.25 | -2.16 | -9.23  | 3.52  | -2.39 |
| 9310 | C1CC1(C(=O)C)Cl                       | C22112864 | -10.25 | -0.19 | -9.53  | 3     | -3.54 |
| 9311 | c1cnccc1C(=C)C=O/[O-]                 | C26515431 | -10.25 | -0.17 | -15.37 | 7.23  | -1.94 |
| 9312 | Cc1c(c(=O)[nH]c(=O)[nH]1)O            | C00013352 | -10.24 | -3.45 | -15.14 | 6.53  | 1.83  |
| 9313 | CCC[C@H]1CC(C(=O)O1)                  | C00388712 | -10.24 | -0.82 | -11.25 | 5.58  | -3.74 |
| 9314 | CC1=C(C(=CC1=O)O)O                    | C00389481 | -10.24 | -5.41 | -15.92 | 10.51 | 0.58  |
| 9315 | Cn1cc(nc1)CC=O                        | C00895896 | -10.24 | -2.42 | -15.08 | 8.69  | -1.43 |
| 9316 | c1cc2ccsc2nc1                         | C01555982 | -10.24 | -2.49 | -13.26 | 5.33  | 0.18  |
| 9317 | CC(=C)Cl(=O)OCCO                      | C01608929 | -10.24 | -1.55 | -13.82 | 5.85  | -0.73 |
| 9318 | C(C(=O)C)Cl                           | C01648213 | -10.24 | -0.5  | -13.74 | 6.47  | -2.47 |
| 9319 | c1nc2c(o1)CCC2                        | C01734291 | -10.24 | -1.46 | -13.67 | 4.44  | 0.45  |
| 9320 | C[C@H]1(C@H)(C)Cl)O                   | C01762876 | -10.24 | -0.93 | -10.23 | 1.55  | -0.63 |
| 9321 | CN(C)C1CCCC1                          | C02569844 | -10.24 | -2    | -7.33  | 2.38  | -3.29 |
| 9322 | C[C@@H]1C[C@@H](O)O                   | C04212241 | -10.24 | -1.88 | -13.75 | 6.21  | -0.83 |
| 9323 | CCCC(=O)CC(=O)C                       | C04552332 | -10.24 | -0.83 | -12.88 | 4.34  | -0.87 |
| 9324 | c1ccc(cc1)NCCO                        | C04806325 | -10.24 | -2.89 | -10.28 | 3.48  | -0.55 |
| 9325 | c12c(nc(nc1[nH]n2)[O-])N              | C05479634 | -10.24 | -4.34 | -17.62 | 8.87  | 2.86  |
| 9326 | C[C@H](CC(F)F)F)O                     | C16082634 | -10.24 | -1.07 | -11.6  | 3.28  | -0.85 |
| 9327 | c1cc(ccc1C/C(=N/O)N)Cl                | C16082778 | -10.24 | -3.23 | -10.61 | 5.17  | -1.57 |
| 9328 | COCCNCC#C                             | C20033344 | -10.24 | 0.57  | -13.1  | 2.77  | -0.47 |
| 9329 | CCc1c([nH]c1N)C(F)F)F                 | C26511521 | -10.24 | -4.55 | -11.2  | 6.94  | -1.42 |
| 9330 | C1[C@H]2C=CC(=O)C@H](O1)O2            | C00078172 | -10.23 | -0.75 | -15.38 | 6.73  | -0.82 |
| 9331 | C1[C@H]2[C@@H]2[C@@H](C1)O2           | C01639894 | -10.23 | -0.94 | -11.18 | 3.2   | -1.3  |
| 9332 | CC1(OCCC1)C=C                         | C01639928 | -10.23 | -1.44 | -10.87 | 2.42  | -0.35 |
| 9333 | c1cc(c(cc1C(=O)C=O)F)F                | C02507504 | -10.23 | -1.51 | -16.23 | 11.44 | -3.94 |
| 9334 | c1cc(c(c(c1)F)O)C(F)F)F               | C02560194 | -10.23 | -2.39 | -10.47 | 4.28  | -1.66 |
| 9335 | CC(=O)OCCCC#C                         | C02567252 | -10.23 | 0.62  | -11.58 | 4.71  | -3.99 |
| 9336 | c1cnc2c(n1)c([nH]n2)[O-]              | C04714875 | -10.23 | -2.24 | -19.25 | 7.43  | 3.83  |
| 9337 | C/C(=C)/C(=O)C1CCCC1/[O-]             | C04876957 | -10.23 | -1.21 | -12.19 | 5.16  | -1.98 |
| 9338 | CS(=O)(=O)Nn1cnnc1                    | C05515275 | -10.23 | -1.17 | -21.69 | 10.86 | 1.77  |
| 9339 | CN1CC(=O)NC1=O                        | C05966178 | -10.23 | -2.08 | -16.37 | 7.47  | 0.76  |
| 9340 | C1[C@H]2C=C[C@@H](C@H)(O1)O2)O        | C06658001 | -10.23 | -1.31 | -14.15 | 4.23  | 0.99  |
| 9341 | Cc1c(sc1n1)CO                         | C13539621 | -10.23 | -1.77 | -14.2  | 5.38  | 0.36  |
| 9342 | Cc1cc(c(nc1)F)N+=[O-][O-]             | C14982834 | -10.23 | -2.11 | -12.04 | 6.92  | -2.99 |
| 9343 | c1c(c(=O)[nH]c(=O)[nH]1)NC(=O)N       | C16857705 | -10.23 | -3.35 | -24    | 11.78 | 5.35  |
| 9344 | c1c(c(c(nc1O)N)N)O                    | C16980118 | -10.23 | -4.74 | -17.03 | 6.02  | 5.51  |
| 9345 | c1c(o[nH]c1=O)C(=O)NO                 | C16983356 | -10.23 | -4.99 | -18.08 | 10.59 | 2.24  |
| 9346 | C1=CC(=O)[C@@H]2[C@@H](C@H](C@H)1O)O2 | C17061956 | -10.23 | -2.42 | -14.95 | 5.88  | 1.27  |
| 9347 | CCOCN=C=O                             | C20252602 | -10.23 | -1.44 | -13.44 | 2.74  | 1.9   |
| 9348 | C[C@H](c1cncc1)[NH3+]                 | C20441648 | -10.23 | -0.53 | -12.3  | 3.35  | -0.75 |
| 9349 | c1cnc(cc1Br)C(F)F)F                   | C21985271 | -10.23 | -2.81 | -7.23  | 3.12  | -3.32 |
| 9350 | CC(=O)OCC(=S)N                        | C32627844 | -10.23 | -1.42 | -17.32 | 9.82  | -1.31 |
| 9351 | c1cc(c(cc1Cl)F)CC#N                   | C00161645 | -10.22 | -0.55 | -13.73 | 6.64  | -2.58 |
| 9352 | c1cc(c(nc1)C#N)Cl                     | C00332990 | -10.22 | -2.86 | -10.82 | 6.12  | -2.65 |
| 9353 | C1[C@H]2[C@@H](C(=O)C1)Cl             | C02031398 | -10.22 | 1.01  | -12.66 | 4.21  | -2.79 |
| 9354 | CCC[C@H](C#C)O                        | C02041127 | -10.22 | -1.29 | -9.71  | 2.17  | -1.39 |
| 9355 | C[C@H](c1cc(cc(c1)F)F)O               | C02525259 | -10.22 | -4.6  | -6.05  | 2.66  | -2.24 |
| 9356 | CO=C/C(Cl=O)OC                        | C02582018 | -10.22 | -1.3  | -11.7  | 4.41  | -1.64 |

|      |                                     |           |        |       |        |       |       |
|------|-------------------------------------|-----------|--------|-------|--------|-------|-------|
| 9357 | c1cc(ccc1/C=C/C=O)Cl                | C03080768 | -10.22 | -2.31 | -12.8  | 6.31  | -1.42 |
| 9358 | C(C(S)O)S                           | C04362873 | -10.22 | -1.13 | -12.43 | 3.54  | -0.2  |
| 9359 | C(=O)NNc1c(non1)N                   | C05368746 | -10.22 | -5.54 | -19.56 | 12.6  | 2.27  |
| 9360 | C[C@H]1[C@@H](C(=O)C1)C             | C06037927 | -10.22 | -0.62 | -11.44 | 2.98  | -1.14 |
| 9361 | Cc1ccc(s1)CO                        | C08727914 | -10.22 | -1.9  | -10.96 | 3.84  | -1.2  |
| 9362 | Cn1cc(c(n1)N)C=O                    | C12370883 | -10.22 | -5.58 | -11.19 | 7.12  | -0.57 |
| 9363 | c1c(cc(cc1F)CC(=O)NN                | C16158280 | -10.22 | -6.02 | -11.54 | 8.81  | -1.47 |
| 9364 | C1C(=CN=NC1=O)O                     | C17063634 | -10.22 | -4.61 | -16.05 | 6.42  | 4.01  |
| 9365 | CC1=NCC(=O)C(=O)N1                  | C17378515 | -10.22 | -3.2  | -15.79 | 5.98  | 2.79  |
| 9366 | Cc1c(snn1)CCI                       | C19093023 | -10.22 | -1.65 | -11.46 | 5     | -2.11 |
| 9367 | C1C=C[C@@H]2[C@H]1CC2=O             | C19230143 | -10.22 | -0.76 | -10.36 | 4.08  | -3.17 |
| 9368 | c1cc(oc1)CNCC(F)F                   | C19505158 | -10.22 | -1.08 | -11.9  | 4.81  | -2.05 |
| 9369 | c1c(cn[nH]1)c2c(c[nH]n2)N           | C19737402 | -10.22 | -6.21 | -13.74 | 8.82  | 0.9   |
| 9370 | C[C@H]([C@@](C(F)F)(O-))F           | C20232452 | -10.22 | -2.43 | -10.42 | 3.42  | -0.79 |
| 9371 | Cc1cccc(n1)Cl                       | C00388111 | -10.21 | -1.39 | -9.77  | 3.86  | -2.92 |
| 9372 | C[C@H]1[C@@H](C(=O)OC(=O)C          | C01095299 | -10.21 | -0.66 | -12.16 | 4.49  | -1.88 |
| 9373 | c1(c([nH]c(=O)[nH]c1=O)[O-])O       | C01847417 | -10.21 | -6.33 | -17.72 | 9.01  | 4.83  |
| 9374 | c1cc(c(cc1F)[N+](=O)[O-])Cl         | C01847554 | -10.21 | -2.96 | -10.35 | 4.79  | -1.7  |
| 9375 | Cc1cc(oc1)FBr                       | C02384021 | -10.21 | -0.41 | -12.06 | 2.64  | -0.38 |
| 9376 | C[C@H](C(=O)OCC(=O)C)O              | C02508059 | -10.21 | 0.14  | -12.66 | 3.88  | -1.58 |
| 9377 | Cc1c(cnn1)CC#N)Cl                   | C02537505 | -10.21 | -1.2  | -13.79 | 7.86  | -3.07 |
| 9378 | C=CCOc1ccc(c1)C=O                   | C03764991 | -10.21 | -2.54 | -13.13 | 7.11  | -1.65 |
| 9379 | CCCc1c([nH+]c(nc1)N)N               | C04771750 | -10.21 | -3.18 | -10.49 | 4.91  | -1.44 |
| 9380 | c1cc(sc1)/C(=C/[N+](=O)[O-])[O-]    | C06829208 | -10.21 | -1.5  | -16.01 | 7.99  | -0.69 |
| 9381 | c1cc(nc1)COBr                       | C14989372 | -10.21 | -1.2  | -13.36 | 4.82  | -0.47 |
| 9382 | C/C(=NO)/C(=O)c1cccc1               | C15221905 | -10.21 | -2.39 | -12.39 | 5.25  | -0.68 |
| 9383 | CCOC(=O)[C@H]1[C@@H](O)F            | C15442310 | -10.21 | 0.07  | -9.8   | 3.21  | -3.68 |
| 9384 | CNc1cc(=O)nc[nH]1                   | C17040194 | -10.21 | -2.04 | -14.95 | 5.34  | 1.44  |
| 9385 | COCCNc1ccc(cc1)F                    | C20051948 | -10.21 | -0.3  | -10.97 | 3.56  | -2.49 |
| 9386 | Cc1cc(ns1)C=O                       | C20443679 | -10.21 | -1.99 | -14.6  | 8.2   | -1.82 |
| 9387 | Cc1cnc(n1)C=O                       | C20443702 | -10.21 | -2.96 | -10.11 | 5.22  | -2.35 |
| 9388 | Cc1cnc(c(n1)Cl)N                    | C21300754 | -10.21 | -1.33 | -13.13 | 4.85  | -0.6  |
| 9389 | CCNc1nc(cc(n1)F)F                   | C00039511 | -10.2  | -1.91 | -7.8   | 2.53  | -3.02 |
| 9390 | Cc1ccc(cc1)N                        | C00388037 | -10.2  | -1.62 | -8.32  | 2.23  | -2.49 |
| 9391 | c1c(c(=O)[nH]c(n1)[O-])[N+](=O)[O-] | C00967347 | -10.2  | -6.45 | -17.26 | 13.93 | -0.42 |
| 9392 | CN(C)C(=O)C(F)F                     | C01603497 | -10.2  | -1.53 | -11.37 | 4.06  | -1.37 |
| 9393 | c1cc(ccc1)NNC(=S)N)O                | C01657381 | -10.2  | -1.9  | -17.99 | 10.31 | -0.63 |
| 9394 | CN1C(=O)CSCC1=O                     | C01676218 | -10.2  | 1.06  | -16.68 | 5.15  | 0.26  |
| 9395 | c1c(c2c([nH]c(=S)[nH]2)nn1)Cl       | C01713791 | -10.2  | -1.55 | -12.73 | 6.37  | -2.29 |
| 9396 | C(=O)C(C(F)F)F                      | C01847431 | -10.2  | -2.45 | -9.89  | 3.99  | -1.84 |
| 9397 | CCOC(=O)[C@@H](C)[N+](=O)[O-]       | C02043884 | -10.2  | 0     | -12.96 | 6.26  | -3.5  |
| 9398 | Cc1ccnc(n1)Br                       | C02525097 | -10.2  | 0.4   | -13.07 | 4.91  | -2.44 |
| 9399 | c1cc(c(cc1F)C(=O)NN)F               | C02578079 | -10.2  | -1.14 | -16.27 | 8.18  | -0.98 |
| 9400 | c1nccc1C(=O)NO                      | C04362829 | -10.2  | -0.57 | -19.99 | 10.04 | 0.32  |
| 9401 | CNC(=O)Cl                           | C04963934 | -10.2  | -2.33 | -12.85 | 4.1   | 0.88  |
| 9402 | Cc1ccc2c(c1)cn[nH]2                 | C05612486 | -10.2  | -1.4  | -10.02 | 4.03  | -2.82 |
| 9403 | C1[C@H]2[C@H](C1)O2                 | C12358906 | -10.2  | -0.97 | -11.12 | 3.19  | -1.3  |
| 9404 | Cc1cc(=O)n([nH]1)C(=[NH2+])N        | C12416814 | -10.2  | -3.41 | -14.93 | 9.71  | -1.57 |
| 9405 | CCOC(=O)C[NH2+]                     | C19168190 | -10.2  | -0.53 | -14.2  | 4.47  | 0.06  |
| 9406 | CC(=O)c1cnoc1[N+](=O)[O-]           | C20311077 | -10.2  | -0.12 | -15.05 | 7.94  | -2.97 |
| 9407 | C(#N)Sc1c(nc([nH]c1=O)N)N           | C22056681 | -10.2  | -5.12 | -20.22 | 15.38 | -0.24 |
| 9408 | c1cnc(c(n1)C=O)Cl                   | C26897747 | -10.2  | -2.46 | -13.37 | 6.51  | -0.87 |
| 9409 | COC(=O)c1cc(c(=O)[nH]c1)N           | C32628217 | -10.2  | -2.15 | -15.93 | 7.9   | -0.03 |
| 9410 | c1ncccc1c2cc([nH]2)O                | C00129538 | -10.19 | -3.76 | -14.08 | 5.83  | 1.81  |
| 9411 | c1c(c(cs1)Cl)C=O                    | C00334485 | -10.19 | -2.22 | -13.82 | 6.52  | -0.67 |
| 9412 | c1(c(c(c(c1F)F)O)F)O                | C00388051 | -10.19 | -1.57 | -13.31 | 3.94  | 0.76  |
| 9413 | c1c(cc(c1)O)O                       | C00391883 | -10.19 | -2.55 | -15.64 | 4.92  | 3.09  |
| 9414 | Cc1ccc(c(c1)O)C(=O)OC               | C00395010 | -10.19 | -0.92 | -14.21 | 5.95  | -1.01 |
| 9415 | Oc1c(cccc1)N                        | C00403404 | -10.19 | -1.43 | -11.5  | 4.11  | -1.38 |
| 9416 | c1cc(c(cc1O)C#N)O                   | C00405075 | -10.19 | 0.25  | -17.37 | 6.27  | 0.65  |
| 9417 | Cc1ccc(cc1)I                        | C01003750 | -10.19 | -0.24 | -10.77 | 1.3   | -0.48 |
| 9418 | COC(=O)c1c(no[nH]1[O-])N            | C01062353 | -10.19 | -4.54 | -11.29 | 7.44  | -1.81 |
| 9419 | C/C=C/C(=O)OCC=C                    | C01561516 | -10.19 | 0.27  | -10.1  | 3.56  | -3.91 |
| 9420 | CC(=O)OC                            | C01597766 | -10.19 | -1.3  | -11.26 | 3.94  | -1.57 |
| 9421 | C=CCSC1=NCCN1                       | C01605548 | -10.19 | -0.93 | -14.65 | 2.67  | 2.73  |
| 9422 | CC/C=C(C)C#N                        | C01765460 | -10.19 | -1.27 | -10.06 | 3.7   | -2.55 |
| 9423 | CCOC(=O)N(C)O                       | C05463729 | -10.19 | -2.14 | -14.57 | 6.34  | 0.19  |
| 9424 | CN(C)S(=O)(=O)NC#N                  | C05524996 | -10.19 | -2.05 | -15.27 | 6.22  | 0.92  |
| 9425 | CCOc1ncc(c(n1)Cl)F                  | C14982379 | -10.19 | -0.88 | -12.27 | 3.69  | -0.73 |
| 9426 | c1cc(oc1)C(=O)c2nccs2               | C15441685 | -10.19 | -0.07 | -14.09 | 6.59  | -2.62 |
| 9427 | c1cc(ncc1/C(=N/O)/N)C(F)F           | C15445959 | -10.19 | -3.15 | -12.45 | 5.67  | -0.26 |
| 9428 | CCOC(=O)c1c([nH]cnc1=O              | C17003049 | -10.19 | -0.09 | -14.95 | 5.62  | -0.78 |
| 9429 | c1cc(nc2c1nsn2)N                    | C17061570 | -10.19 | -6.28 | -13.28 | 9.47  | -0.1  |
| 9430 | c1ccc(c(c1)NC(=S)C(=O)N)O           | C20508137 | -10.19 | -6.31 | -13.18 | 8.27  | 1.03  |
| 9431 | COc1ccc(cc1)OC(=O)OC                | C30836142 | -10.19 | -1.36 | -10.74 | 5.51  | -3.61 |
| 9432 | CCOC(=O)c1nccn1                     | C31776762 | -10.19 | 1.25  | -18.22 | 8.77  | -2    |
| 9433 | c1cc2c(cc1F)C(no2)N                 | C33358877 | -10.19 | -1.64 | -13.33 | 7.01  | -2.22 |
| 9434 | C1[C@H]2C=CC(=O)[C@H](O1)O2         | C00078169 | -10.18 | -1.98 | -14.31 | 6.81  | -0.71 |
| 9435 | COc1c1ccc(s1)Br                     | C00153666 | -10.18 | 0.16  | -11.68 | 4.53  | -3.19 |
| 9436 | Cc1cccc(n1)Br                       | C00396090 | -10.18 | -1.3  | -9.71  | 3.8   | -2.97 |
| 9437 | c1ccc(cc1)NNC(=S)NN                 | C01555391 | -10.18 | -1.65 | -14.28 | 8.32  | -2.56 |
| 9438 | c1coc(=O)1                          | C01577290 | -10.18 | -2.11 | -13.28 | 7.08  | -1.88 |
| 9439 | CCCC(=O)OC=C                        | C01665007 | -10.18 | 2.35  | -13.29 | 3.55  | -2.79 |
| 9440 | C[C@H]1C=CC(=O)O1                   | C01718609 | -10.18 | -2.28 | -13.31 | 7.89  | -2.49 |
| 9441 | c1cc(c(c2c1[nH]cc2)F)F              | C02386969 | -10.18 | -1.96 | -13.57 | 6.52  | -1.17 |
| 9442 | C[C@@H](C(=O)C(=O)OC                | C03848374 | -10.18 | -1.22 | -11.98 | 4.97  | -1.95 |
| 9443 | COC1OCCO1                           | C03861532 | -10.18 | -1.07 | -12.39 | 3.58  | -0.31 |
| 9444 | C[C@H]1CC=C[C@@H](C1)O              | C05809801 | -10.18 | -0.69 | -9.88  | 1.81  | -1.42 |
| 9445 | C[C@H](C(=O)C(=O)OC                 | C06036071 | -10.18 | -0.13 | -13.08 | 4.99  | -1.97 |
| 9446 | c1[nH]c(=O)c(c(n1)[O-])Br           | C15021880 | -10.18 | -2.56 | -16.44 | 5.09  | 3.73  |



|      |                                       |           |        |       |        |       |       |
|------|---------------------------------------|-----------|--------|-------|--------|-------|-------|
| 9447 | c1cncc2c1[nH]c(=S)[nH]2               | C19878153 | -10.18 | -3.16 | -16.92 | 11.99 | -2.09 |
| 9448 | C#CCOCC#N                             | C20519005 | -10.18 | -1.53 | -14.48 | 7.76  | -1.93 |
| 9449 | c1cc(c(c(c1)Cl)C=O)F                  | C00151783 | -10.17 | -2.65 | -11.49 | 5.52  | -1.54 |
| 9450 | c1cccc1C(=S)N                         | C00161816 | -10.17 | -1.81 | -17.97 | 10.98 | -1.37 |
| 9451 | Cc1cccc(c1)NC(=O)OC                   | C00395292 | -10.17 | 0.34  | -15.41 | 5.26  | -0.37 |
| 9452 | C1CN2C(=O)CSC2=N1                     | C01235980 | -10.17 | -1.07 | -14.09 | 5.69  | -0.7  |
| 9453 | CCCCSC                                | C01644625 | -10.17 | -0.31 | -10.01 | 1.15  | -1    |
| 9454 | c1cc(ccc1CC(=O)N)N                    | C01675015 | -10.17 | -1.38 | -16.49 | 7.54  | 0.16  |
| 9455 | CCNC(=O)c1csnn1                       | C01709778 | -10.17 | -2.32 | -12.5  | 4.83  | -0.19 |
| 9456 | C[C@@H](C#C)O                         | C01756137 | -10.17 | -1.02 | -11.44 | 2.4   | -0.11 |
| 9457 | C=Cc1ccc(cc1)C=C                      | C02015938 | -10.17 | -0.33 | -6.75  | 1.94  | -5.02 |
| 9458 | C(C#CCC)O                             | C02383013 | -10.17 | -1.79 | -12.18 | 4.46  | -0.67 |
| 9459 | c1c(c(cc(c1F)N)F)C(F)(F)F             | C02556415 | -10.17 | -1.97 | -9.23  | 2.97  | -1.95 |
| 9460 | COc1ccc(cc1F)Cl                       | C02567850 | -10.17 | 2.06  | -14.15 | 3.28  | -1.37 |
| 9461 | COCC/C(=C/C(=O)C(F)(F)F)/[O-]         | C03885152 | -10.17 | -0.93 | -10.12 | 2.94  | -2.06 |
| 9462 | c1ccc(cc1)c2ccc([nH]n2)N              | C03887184 | -10.17 | -0.13 | -12.73 | 5.01  | -2.32 |
| 9463 | c1cncc(c1Br)C=O                       | C04208984 | -10.17 | -2.5  | -9.32  | 3.85  | -2.19 |
| 9464 | C(C([C@H](C(F)(F)F)F)F)F)O            | C04262388 | -10.17 | -2.14 | -11.29 | 3.84  | -0.57 |
| 9465 | CCOC(=O)CO                            | C04284427 | -10.17 | -3.78 | -12.6  | 6.65  | -0.44 |
| 9466 | CCOC(=O)c1c(n[n-]n1)Cl                | C04817834 | -10.17 | 0.4   | -13.53 | 4.27  | -1.31 |
| 9467 | CC(C)OP@[C@H](O)O                     | C05381386 | -10.17 | -4.05 | -12.33 | 6.67  | -0.46 |
| 9468 | COC(=O)[C@H]1CCCO1                    | C06658150 | -10.17 | 0.26  | -13.77 | 6.02  | -2.69 |
| 9469 | CC(C)OC(=[N-])C(F)(F)F                | C12417434 | -10.17 | -0.69 | -10.01 | 1.25  | -0.73 |
| 9470 | Cc1c(scn1)C=O                         | C12959076 | -10.17 | 0.75  | -15.71 | 6.35  | -1.55 |
| 9471 | c1cc(c(nc1)C=O)Cl                     | C14982472 | -10.17 | -0.33 | -14.01 | 6.37  | -2.2  |
| 9472 | CC(C(=O)N)(F)F                        | C16158444 | -10.17 | -1    | -13.36 | 3.5   | 0.68  |
| 9473 | CCc1c(c(ncn1)Cl)F                     | C19615494 | -10.17 | -0.99 | -8.31  | 2.43  | -3.31 |
| 9474 | c1cc(ccc1NCC#N)Br                     | C20051713 | -10.17 | -2.3  | -10.46 | 5.9   | -3.31 |
| 9475 | C[C@H](C(=O)Cl)N                      | C20216997 | -10.17 | -0.03 | -14.12 | 3.74  | 0.24  |
| 9476 | CC/C=C/C=O                            | C20231649 | -10.17 | -1.14 | -10.82 | 3.35  | -1.56 |
| 9477 | CCOC(=O)CCO                           | C20232648 | -10.17 | -2.92 | -11.28 | 4.81  | -0.77 |
| 9478 | C[C@@H]1C=NN([C@H]1C)C                | C22205954 | -10.17 | -1.23 | -9.91  | 3.23  | -2.26 |
| 9479 | Cn1c(nnn1)c2cccc2                     | C00039506 | -10.16 | -1.65 | -14.04 | 7.23  | -1.71 |
| 9480 | c1cc(c(cc1F)NC(=S)N)F                 | C00156320 | -10.16 | -0.84 | -15.72 | 9.2   | -2.81 |
| 9481 | c1cc2c(cc1N)ocn2                      | C00168382 | -10.16 | -3.42 | -13.77 | 6.33  | 0.7   |
| 9482 | c1cc(c(cc1Cl)O)NC(=O)NN               | C00369954 | -10.16 | -1.59 | -15.7  | 6.09  | 1.04  |
| 9483 | Cc1c(sc(n1)Cl)C                       | C00407028 | -10.16 | -0.7  | -10.22 | 3.75  | -2.99 |
| 9484 | C(c1nc(no1)c2c(non2)N)Cl              | C01084794 | -10.16 | 0.85  | -16.65 | 6.04  | -0.39 |
| 9485 | CCSCC(=C)Cl                           | C01639899 | -10.16 | -0.89 | -10.29 | 2.09  | -1.07 |
| 9486 | Cn1c(=O)[nH]c(=O)c(n1)C(=O)Cl         | C01686835 | -10.16 | 1.1   | -17.16 | 6.32  | -0.42 |
| 9487 | CC/C=C/C=O                            | C01752910 | -10.16 | -0.72 | -12.31 | 6.46  | -3.58 |
| 9488 | Cc1c(c(nc(n1)F)F)Cl                   | C02243611 | -10.16 | 0.93  | -11.12 | 2.34  | -2.31 |
| 9489 | c1(c(n[n-]n1)Br)C(=O)NN               | C04115061 | -10.16 | 0.31  | -18.89 | 6.12  | 2.3   |
| 9490 | C1CC(C1)/C(=NH+)[N-]/N                | C04202552 | -10.16 | -1.07 | -11.17 | 2.93  | -0.86 |
| 9491 | c1c(cnc(n1)C(=O)N)Cl                  | C04228199 | -10.16 | -2.7  | -14.31 | 6.54  | 0.31  |
| 9492 | COC(=O)c1cscn1                        | C04368835 | -10.16 | 1.2   | -15.79 | 6.16  | -1.73 |
| 9493 | c1ccc2c(c1)CCN=C2                     | C04403871 | -10.16 | -0.7  | -9.94  | 3.14  | -2.67 |
| 9494 | COC(=O)[C]C@H([C(=O)OC])S             | C05138610 | -10.16 | 0.22  | -13.12 | 4.7   | -1.96 |
| 9495 | Cc1c(nc[nH]c1=O)C                     | C08700020 | -10.16 | -2.46 | -13.08 | 5.07  | 0.31  |
| 9496 | COC(=O)c1c(ncs1)N                     | C08764165 | -10.16 | -2.65 | -12.59 | 6.09  | -1.01 |
| 9497 | CCOC(=O)C=C                           | C17161119 | -10.16 | 0.3   | -9.78  | 3.33  | -4    |
| 9498 | [C@H-]([C(=NH2+)]N)Cl                 | C19735101 | -10.16 | -5.24 | -12.43 | 7.32  | 0.19  |
| 9499 | CCc1[nH]c(c(n1)C=O)Cl                 | C20357664 | -10.16 | -3.12 | -11.3  | 6.48  | -2.22 |
| 9500 | c1ccnc(c1)/C(=C/C(=O)C(F)F)/[O-]      | C20369428 | -10.16 | -2.39 | -9     | 6.37  | -5.14 |
| 9501 | C(C#N)OCC(C(F)F)F                     | C20518189 | -10.16 | -2.07 | -13.9  | 8.28  | -2.47 |
| 9502 | c1cc2c(c1)c(n2)O                      | C29865984 | -10.16 | -2.5  | -15.25 | 6.44  | 1.15  |
| 9503 | c1ccc(cc1)CNS(=O)(=O)C(F)(F)F         | C00057550 | -10.15 | -1.83 | -15.51 | 5.06  | 2.14  |
| 9504 | C(#N)c1c(c(c(c1F)F)N)F                | C00120149 | -10.15 | 1.59  | -13.65 | 4.06  | -2.15 |
| 9505 | C[C@@H]1CCCN=C1=O                     | C00158406 | -10.15 | -2.59 | -11.62 | 5.2   | -1.15 |
| 9506 | c1c(csc1Cl)C(=O)N                     | C00334077 | -10.15 | -2.02 | -17.2  | 7.19  | 1.88  |
| 9507 | CCOC(=O)NCC(=O)N                      | C01571298 | -10.15 | -4.99 | -14.58 | 6.99  | 2.42  |
| 9508 | Cn1nc(nn1)C(=O)N                      | C01742190 | -10.15 | -2.69 | -16.18 | 7.64  | 1.08  |
| 9509 | COC(=O)CC(=O)C(F)(F)F                 | C02168480 | -10.15 | 0.03  | -14.18 | 7.16  | -3.15 |
| 9510 | c1c(c(c([nH]1)C(=O)C(F)(F)F)C(F)(F)F) | C02519460 | -10.15 | -0.99 | -11.3  | 5.35  | -3.22 |
| 9511 | CC1([C@H](O)OC)C                      | C02539384 | -10.15 | -1.42 | -11.41 | 3.87  | -1.18 |
| 9512 | CN1[C@H](C(=O)NC1=O)O                 | C03788800 | -10.15 | -2.98 | -18.1  | 6.91  | 4.02  |
| 9513 | c1cc(cnc1)c2cc([nH]2)O                | C04626320 | -10.15 | -3.11 | -14.83 | 6.14  | 1.65  |
| 9514 | C(=O)(C(=O)N)N                        | C05177750 | -10.15 | -8.48 | -10.33 | 4.76  | 3.9   |
| 9515 | CCNc1c(cc(=O)[nH]c1=O)[O-]            | C05346174 | -10.15 | -3.66 | -15.39 | 8.3   | 0.59  |
| 9516 | c1cc(nc(c1)Cl)C#N                     | C06093447 | -10.15 | -1.83 | -12.01 | 6.34  | -2.64 |
| 9517 | CC[C@H](C(=O)C(F)(F)F)Br              | C08700958 | -10.15 | -0.07 | -8.78  | 5.03  | -3.33 |
| 9518 | C1COC(O)CC[N+](=O)[O-]                | C15021206 | -10.15 | -2.55 | -11    | 2.08  | -1.68 |
| 9519 | C[C@@H]1C(=O)NC(=S)N=N1               | C16039605 | -10.15 | -2.22 | -14.91 | 5.63  | 1.37  |
| 9520 | c1c(c(=O)[nH]c(n1)N)CCO               | C17174414 | -10.15 | -3.84 | -15.14 | 5.92  | 2.91  |
| 9521 | Cc1ccn(n1)CCO                         | C19092107 | -10.15 | -2.9  | -11.67 | 4.84  | -0.43 |
| 9522 | COC(=O)C1=CCCC1N                      | C19942855 | -10.15 | -2    | -10.33 | 4.43  | -2.26 |
| 9523 | c1c(c(cc1Cl)F)F)C#N                   | C22001384 | -10.15 | 0.57  | -9.78  | 3.13  | -4.06 |
| 9524 | CN1CSCSC1                             | C31308455 | -10.15 | -0.61 | -10.26 | 2.32  | -1.59 |
| 9525 | C(CCC)CC=O                            | C32302927 | -10.15 | -0.22 | -11.84 | 4.97  | -3.06 |
| 9526 | c1ccc(cc1)C(=O)NN                     | C00115752 | -10.14 | -2.76 | -13.76 | 7.3   | -0.91 |
| 9527 | CC(=O)Nc1ccc(cc1)N                    | C00152946 | -10.14 | -1.01 | -15.43 | 7.26  | -0.95 |
| 9528 | C[C@H](C=C)OC(=O)C                    | C00394373 | -10.14 | -0.32 | -11.39 | 3.88  | -2.31 |
| 9529 | c1ccc(cc1)OC2=NC(=O)C(=O)S2           | C01568197 | -10.14 | -0.23 | -12.86 | 4.61  | -1.66 |
| 9530 | C=Nc1cccc1O                           | C01596247 | -10.14 | -2.88 | -13.34 | 5.61  | 0.47  |
| 9531 | CCOC(=O)NCCO                          | C01718597 | -10.14 | -3.69 | -14.21 | 5.94  | 1.82  |
| 9532 | c1cncc(c1Br)Cl                        | C02526750 | -10.14 | -2.2  | -10.52 | 2.2   | 0.38  |
| 9533 | c1cc(c(c(c1)O)F)C(F)(F)F              | C02575080 | -10.14 | -3.76 | -10.11 | 5.2   | -1.47 |
| 9534 | C1CC1N2C(=O)C(=O)NC2=O                | C04218315 | -10.14 | -4.81 | -11.11 | 4.27  | 1.51  |
| 9535 | CC(=Nn1cc(cn1)[N-](=O)[O-])C          | C05003193 | -10.14 | -0.93 | -12.88 | 7.09  | -3.42 |
| 9536 | CCc1cnc(o1)CC                         | C05341800 | -10.14 | -1.15 | -12.71 | 3.83  | -0.12 |

|      |                                |            |        |       |        |       |       |
|------|--------------------------------|------------|--------|-------|--------|-------|-------|
| 9537 | c1nnc(s1)NCC(=O)NO             | C05497622  | -10.14 | -7.05 | -15.78 | 11.19 | 1.51  |
| 9538 | c1ccnc(c1)[C@@H](O)OS@=(O)O    | C05572597  | -10.14 | -8.46 | -17.93 | 13.77 | 2.49  |
| 9539 | c1c(nc2n1CCS2)Cl               | C05641908  | -10.14 | -0.75 | -17.81 | 7.76  | 0.66  |
| 9540 | COCC/C=C/CO                    | C06385258  | -10.14 | -0.82 | -10.67 | 2.56  | -1.22 |
| 9541 | C=CC[C@@H]1C(=O)N=C(S1)N       | C08615002  | -10.14 | -0.02 | -12.04 | 3.33  | -1.41 |
| 9542 | C1CC1C(=S)N                    | C12394934  | -10.14 | -2.28 | -11.94 | 5.66  | -1.58 |
| 9543 | Cc1ccc(cc1)/C=C/CO             | C13542659  | -10.14 | -0.97 | -9.87  | 3.25  | -2.56 |
| 9544 | c1cc2c(cc1F)c(nH)2O            | C14983573  | -10.14 | -4.6  | -11.77 | 5.19  | 1.04  |
| 9545 | c1ccc2c(c1)cc(=O)[nH]n2        | C15767326  | -10.14 | -1.94 | -14.01 | 7.51  | -1.7  |
| 9546 | Cc1cc(ncc1F)Cl                 | C16159659  | -10.14 | 1.11  | -10.68 | 2.4   | -2.97 |
| 9547 | Cc1ccncc1Br                    | C20358063  | -10.14 | -1.17 | -11.07 | 4.91  | -2.82 |
| 9548 | c1cn(cn1)C[C@@H]2CO2           | C22178511  | -10.14 | -0.05 | -15.27 | 7.47  | -2.29 |
| 9549 | Cc1ccnc(c1)Cl                  | C00388110  | -10.13 | -0.04 | -10.55 | 3.47  | -3    |
| 9550 | COCC(=O)c1ccncc1               | C00391131  | -10.13 | -1.17 | -10.86 | 4.4   | -2.5  |
| 9551 | CCSc1[n-]nc(n1)C(F)(F)F        | C01047355  | -10.13 | 1.75  | -12.53 | 3.53  | -2.89 |
| 9552 | c1cc(ccc1)CONC(=O)N            | C01398289  | -10.13 | -3.58 | -16.11 | 10.82 | -1.26 |
| 9553 | CG(=Cc1ccn1)C                  | C01703390  | -10.13 | 0.24  | -11.96 | 3.46  | -1.88 |
| 9554 | CCC[C@H]([N+](=O)[O-])Br       | C01758989  | -10.13 | -0.64 | -11.43 | 2.41  | -0.48 |
| 9555 | CCOC(=O)C[C@H](C(F)(F)F)O      | C02168466  | -10.13 | -1.08 | -12.27 | 5.01  | -1.79 |
| 9556 | C(C(=O)Cl)S[C@H](C(F)(F)F)Cl   | C04204957  | -10.13 | -2.28 | -9.68  | 3.67  | -1.84 |
| 9557 | Cc1cnn(c1)CO                   | C04290890  | -10.13 | -0.98 | -14.68 | 4.96  | 0.57  |
| 9558 | C1COP(=O)O1                    | C04803593  | -10.13 | -1.28 | -13.49 | 3.94  | 0.71  |
| 9559 | Cc1ccc(cc1)C(=S)N              | C06070792  | -10.13 | -0.95 | -15.01 | 9.12  | -3.29 |
| 9560 | c1c(c[n1]C(=O)CC)Cl            | C06328676  | -10.13 | 0.02  | -11.58 | 4.18  | -2.76 |
| 9561 | C1C=CC(=O)NC1=O                | C13546090  | -10.13 | -1.92 | -16.64 | 8.28  | 0.15  |
| 9562 | C1Cc2c(n[nH]c2C=O)C1           | C20270526  | -10.13 | -2.86 | -14.34 | 8.97  | -1.9  |
| 9563 | C[C@@H]1CC(=C(C1=O)O)C         | C25695707  | -10.13 | 0.79  | -13.97 | 4.98  | -1.93 |
| 9564 | Cc1cccnc1N[N+](=O)[O-]         | C00053412  | -10.12 | 1.81  | -15.29 | 7.02  | -3.65 |
| 9565 | c1cc2c(cc1Cl)nsn2              | C00168246  | -10.12 | -2.9  | -11.96 | 3.16  | 1.59  |
| 9566 | COCC1cc[nH]1O                  | C00335575  | -10.12 | -2.22 | -16.62 | 5.93  | 2.8   |
| 9567 | c1ccc(cc1)CC(=O)N              | C00394644  | -10.12 | -4.85 | -10.79 | 6.85  | -1.32 |
| 9568 | Cc1ccc(c1)C=O                  | C00896726  | -10.12 | -1.53 | -9.17  | 4.26  | -3.68 |
| 9569 | CC[C@@H](CC=C)O                | C01766031  | -10.12 | -0.19 | -11.53 | 1.49  | 0.12  |
| 9570 | C1[C][C@@H](OC)COC(=O)C(F)(F)F | C02155893  | -10.12 | 2.34  | -13.46 | 3.18  | -2.18 |
| 9571 | Cn1ccc(c1)CO                   | C02383102  | -10.12 | -3.16 | -11.36 | 5.38  | -0.97 |
| 9572 | c1c(cc(c(c1C(=O)C)F)F)F        | C02575067  | -10.12 | 1.41  | -12.63 | 3.63  | -2.53 |
| 9573 | c1ccc2c(c1)c(ns2)[O-]          | C02581983  | -10.12 | -3.96 | -12    | 5.87  | -0.03 |
| 9574 | CC(=O)COCC#C                   | C03121853  | -10.12 | -0.06 | -16.11 | 8.05  | -2    |
| 9575 | C(S)C#N                        | C04501379  | -10.12 | -1.27 | -10.93 | 4.21  | -2.14 |
| 9576 | C=C[N+](=O)[O-]                | C05194331  | -10.12 | -1.35 | -12.84 | 5.8   | -1.74 |
| 9577 | C(=O)C(C(C(F)(F)Cl)(F)(F)F)N   | C05287059  | -10.12 | -2.78 | -10.41 | 3.58  | -0.51 |
| 9578 | c1ccc(cc1)OC(=O)NCO            | C05484624  | -10.12 | 0.11  | -19.54 | 8.11  | 1.2   |
| 9579 | c1cc(ccc1[C@@H]2CO2)O          | C06093218  | -10.12 | -1.86 | -14.62 | 4.73  | 1.64  |
| 9580 | c1cc(ccc1C(=O)CO)O             | C13542648  | -10.12 | -4.05 | -12.54 | 6.57  | -0.09 |
| 9581 | COCC/C=C/C(=O)C                | C13544952  | -10.12 | 0.42  | -10.37 | 4.2   | -4.37 |
| 9582 | c1csc(c1C)Cl                   | C16123946  | -10.12 | -0.4  | -7.88  | 2.14  | -3.98 |
| 9583 | C1COCC[C@H]1CCl                | C20078002  | -10.12 | 0.42  | -10.43 | 1.99  | -2.1  |
| 9584 | C[C@H](C1CC1)S                 | C20476538  | -10.12 | -0.63 | -7.47  | 1.18  | -3.19 |
| 9585 | CNc1ccc(cn1)Br                 | C21516533  | -10.12 | -0.68 | -10.03 | 2.99  | -2.39 |
| 9586 | C[C@H](c1cnn(c1)C)O            | C26546637  | -10.12 | -3.41 | -12.36 | 5.97  | -0.32 |
| 9587 | CCOC(=O)c1ccc[nH]1             | C00165736  | -10.11 | 0.99  | -13.36 | 5.39  | -3.14 |
| 9588 | CCCOCC(=S)S                    | C01562478  | -10.11 | -3.04 | -11.98 | 4     | 0.9   |
| 9589 | c1cnc2nncn2c1                  | C01597159  | -10.11 | -2.68 | -19.73 | 13.85 | -1.55 |
| 9590 | CC(C)N[N+](=O)[O-]             | C01668640  | -10.11 | -1.49 | -11.4  | 4.47  | -1.68 |
| 9591 | COc1ccc(cc1)C=C                | C01675020  | -10.11 | -0.42 | -10.84 | 2.68  | -1.53 |
| 9592 | CC(=O)OC[C@H](CC)O             | C01699458  | -10.11 | -0.48 | -15.91 | 5.94  | 0.34  |
| 9593 | CCSCC#N                        | C01700241  | -10.11 | 0.34  | -10.92 | 3.99  | -3.52 |
| 9594 | COc1ccc(cc1N)F                 | C01706177  | -10.11 | -2.32 | -9.32  | 2.93  | -1.39 |
| 9595 | CCOC(=O)[C@H](C#N)Br           | C01708352  | -10.11 | -0.01 | -11.88 | 5.02  | -3.23 |
| 9596 | CC[C@H](C)O                    | C02539567  | -10.11 | -0.39 | -10.18 | 1.38  | -0.92 |
| 9597 | C=COCCCO                       | C02572050  | -10.11 | -0.23 | -12.43 | 3     | -0.45 |
| 9598 | Cc1cc(cen1)C#N                 | C04099779  | -10.11 | -1.85 | -10.85 | 4.05  | -1.46 |
| 9599 | C[C@@H]1[C@@H](CCO1)S          | C04262494  | -10.11 | 0.33  | -10.78 | 2.02  | -1.68 |
| 9600 | C=CN1CCOC1=O                   | C05048437  | -10.11 | -0.93 | -15.42 | 7.72  | -1.49 |
| 9601 | c1cc(ccc1/C=C/O)[N+](=O)[O-]   | C08579449  | -10.11 | -2.38 | -14.72 | 8.77  | -1.77 |
| 9602 | c1c(ncnc1O)C(F)F               | C12958923  | -10.11 | -1.36 | -13.53 | 4.43  | 0.36  |
| 9603 | C1CC(=O)N(C1)C/C(=N/O)/N       | C131116400 | -10.11 | -3.91 | -15.8  | 9.26  | 0.34  |
| 9604 | c1cc2c(c(c1)N)C(=N)non2        | C15909741  | -10.11 | -1.68 | -12.49 | 5.59  | -1.54 |
| 9605 | C/C(=N/O)/C=N/O                | C17300243  | -10.11 | -5.45 | -14.71 | 7.8   | 2.25  |
| 9606 | CCc1cnn1N                      | C19089908  | -10.11 | -3.25 | -11.82 | 6.33  | -1.38 |
| 9607 | c1c(cc1)Br)CO                  | C30678085  | -10.11 | -2.65 | -15.7  | 6.23  | 2     |
| 9608 | Cc1ccc(c1)NN                   | C00085252  | -10.11 | -2.12 | -8.33  | 2.63  | -2.28 |
| 9609 | c1ccc2c(c1)CCN2N               | C00153910  | -10.1  | -2.15 | -8.58  | 2.92  | -2.28 |
| 9610 | c1cc(ncc1Cl)Cl                 | C00336169  | -10.1  | -2.12 | -11.9  | 4.04  | -0.12 |
| 9611 | CC1(CCCC1)O                    | C01602491  | -10.1  | -1.72 | -8.95  | 1.66  | -1.09 |
| 9612 | c1ccc2c(c1)c(c[nH]2)O          | C01628352  | -10.1  | -3.88 | -13.25 | 8.18  | -1.14 |
| 9613 | c1cc(oc1CO)CO                  | C01672225  | -10.1  | -4.89 | -14.76 | 6.79  | 2.77  |
| 9614 | C[C@@H](CO)C(=O)C              | C01690992  | -10.1  | -1.6  | -12.29 | 3.78  | 0.01  |
| 9615 | CC(C)OCC#N                     | C01847865  | -10.1  | -0.25 | -11.31 | 4.11  | -2.65 |
| 9616 | CCO[C@H](C(F)(F)F)O            | C02040616  | -10.1  | -2.19 | -9.78  | 2.41  | -0.54 |
| 9617 | c1c([nH]nc1CO)CO               | C02518933  | -10.1  | -6.06 | -16.25 | 7.54  | 4.67  |
| 9618 | C[C@H](CO)C=C                  | C02539288  | -10.1  | -0.7  | -11.65 | 1.8   | 0.45  |
| 9619 | CCOC(=O)[C@H](C(F)(F)F)O       | C02548173  | -10.1  | -0.68 | -11.54 | 3.65  | -1.53 |
| 9620 | Cn1ccc(cn1)/C=N/O              | C02578418  | -10.1  | -3.03 | -14.39 | 7.18  | 0.14  |
| 9621 | c1ccnc(c1)NC(=O)C(=O)N         | C03043690  | -10.1  | -2.07 | -18.28 | 7.72  | 2.52  |
| 9622 | c1c(nc2nncn2n1)[O-]            | C03070866  | -10.1  | -2.85 | -18.62 | 10.06 | 1.3   |
| 9623 | C[C@H](CCS)O                   | C04533097  | -10.1  | -1.09 | -12.73 | 2.1   | 1.62  |
| 9624 | CCO[C@H]1OCCS1                 | C05718367  | -10.1  | -0.36 | -14.03 | 3.56  | 0.74  |
| 9625 | CC(=C/C=C/C(=O)C)C             | C14591922  | -10.1  | -0.55 | -9.43  | 3.82  | -3.94 |
| 9626 | C[C@H]1C(=O)[C@H](S1)C         | C17141873  | -10.1  | 0.03  | -10.17 | 2.85  | -2.8  |

|      |                                   |           |        |       |        |       |       |
|------|-----------------------------------|-----------|--------|-------|--------|-------|-------|
| 9627 | C1C(=O)N=C(O)N                    | C17173516 | -10.1  | -2.04 | -15.35 | 4.23  | 3.06  |
| 9628 | C1CC(C1)CC#N                      | C19093253 | -10.1  | -0.56 | -10.54 | 4.48  | -3.49 |
| 9629 | CC[C@H](C)SCCC#N                  | C19870152 | -10.1  | -0.78 | -8.67  | 3.89  | -4.55 |
| 9630 | c1cnc(cn1)NCCO                    | C21796689 | -10.1  | -2.07 | -15.9  | 6.43  | 1.44  |
| 9631 | c1ccc(c(c1)O)OC2CC2               | C21991259 | -10.1  | -0.92 | -13.4  | 6.84  | -2.62 |
| 9632 | Cc1ccc(nc1)Br                     | C00409192 | -10.09 | -0.7  | -12.84 | 3.33  | 0.11  |
| 9633 | C=CCNC1=CCO1                      | C01673732 | -10.09 | -0.24 | -16.92 | 3.33  | 3.75  |
| 9634 | C[C@H](CC#N)CCI                   | C01707957 | -10.09 | -1.78 | -11.19 | 6.11  | -3.23 |
| 9635 | Cc1cc(c(c1)C)S                    | C02002624 | -10.09 | -0.44 | -9.15  | 2.63  | -3.13 |
| 9636 | C[C@H](CC(=O)OC)Cl                | C02162125 | -10.09 | -2.41 | -10.69 | 4.69  | -1.68 |
| 9637 | c1csc(n1)NC(=S)NN                 | C02275347 | -10.09 | -3.59 | -15.69 | 11.28 | -2.09 |
| 9638 | CCc1nnc(n1)NN                     | C03133970 | -10.09 | -2.71 | -13.37 | 8.24  | -2.24 |
| 9639 | CC[C@H](C(=O)Cl)Cl                | C05227378 | -10.09 | 0.59  | -11.81 | 1.97  | -0.83 |
| 9640 | CN(C)C/C(=N/O)N                   | C19424528 | -10.09 | -4.17 | -13.69 | 5.67  | 2.1   |
| 9641 | C1CCC(C1)ON                       | C19779147 | -10.09 | -1.55 | -9.53  | 2.23  | -1.25 |
| 9642 | c1ccc(cc1)COP@H(=O)ON             | C19910525 | -10.09 | -1.22 | -14.64 | 8.19  | -2.42 |
| 9643 | c1cc(oc1)c2cc(sc2)C=O             | C22200606 | -10.09 | 0.31  | -12.6  | 6.05  | -3.84 |
| 9644 | C/C=C/[C@H]1CCC(=O)C1=C           | C01575071 | -10.08 | -1.29 | -10.68 | 3.64  | -1.75 |
| 9645 | CC=CCCO                           | C01680814 | -10.08 | -0.5  | -12.38 | 3.39  | -0.6  |
| 9646 | CSCc1ccc(cc1)N                    | C01729092 | -10.08 | -1.41 | -12.18 | 2.87  | 0.65  |
| 9647 | C/C=C(C)CCO                       | C01995218 | -10.08 | -0.75 | -11.91 | 1.92  | 0.67  |
| 9648 | CC(=O)[C@H](OC)F                  | C02032483 | -10.08 | -0.73 | -12.16 | 4.36  | -1.55 |
| 9649 | CCOC(=O)CCC(=O)Cl                 | C02242610 | -10.08 | 0.22  | -10.74 | 3.74  | -3.29 |
| 9650 | c1c(c[nH]1)CCCO                   | C02385076 | -10.08 | -4.03 | -14.38 | 5.73  | 2.6   |
| 9651 | COCc1c(ccc1)F)N                   | C02527852 | -10.08 | 0.69  | -14.22 | 4.88  | -1.42 |
| 9652 | CC(=C)(C)(C)O                     | C02579181 | -10.08 | -0.74 | -10.66 | 1.52  | -0.19 |
| 9653 | C1C=C[C@@H]2[C@@H]1C(=O)C2        | C05046473 | -10.08 | -0.58 | -9.25  | 3.05  | -3.3  |
| 9654 | CC(=NOC)C                         | C05048375 | -10.08 | -0.05 | -11.76 | 3.48  | -1.74 |
| 9655 | C1CC(=NNC(=O)N)C1                 | C05081169 | -10.08 | -1.48 | -14.7  | 5.81  | 0.29  |
| 9656 | C1CCc2c(c(on2)N)C1                | C05175401 | -10.08 | 0.63  | -14.35 | 4.49  | -0.86 |
| 9657 | C[C@H]1[C@@H](C(=O)OC)1           | C06030659 | -10.08 | -0.87 | -12.7  | 5.97  | -2.48 |
| 9658 | CNC(=S)Nc1cc(coc1)F               | C07571141 | -10.08 | 0.33  | -15.63 | 8.83  | -3.61 |
| 9659 | Cc1ccc(cn1)C=O                    | C08698167 | -10.08 | -2.15 | -12.52 | 5.44  | -0.85 |
| 9660 | c1cc(ncc1C(F)(F)F)OCC#N           | C11535916 | -10.08 | -0.52 | -12.35 | 5.1   | -2.31 |
| 9661 | CC(=O)Nc1cc(coc1)F)N              | C12505819 | -10.08 | -1.37 | -13.56 | 5.98  | -1.12 |
| 9662 | c1csc2c1nc[nH]c2=O                | C13598177 | -10.08 | -4.58 | -12.28 | 6.28  | 0.5   |
| 9663 | c1c2c(cc1c1)C[nH]2                | C13656634 | -10.08 | -4.95 | -7.75  | 6.34  | -3.71 |
| 9664 | Cc1cccc(n1)CBr                    | C15932735 | -10.08 | -0.35 | -9.69  | 3.54  | -3.58 |
| 9665 | Cc1c(cc(cn1)Br)[N+]([O-])         | C21303269 | -10.08 | -1.58 | -7.86  | 2.51  | -3.15 |
| 9666 | C1COCC(=O)[C@H]1ON                | C22006360 | -10.08 | -1.76 | -14.44 | 6.29  | -0.17 |
| 9667 | c1cc(ncc1Br)C(=O)N                | C00151257 | -10.07 | -2.68 | -11.32 | 4.11  | -0.18 |
| 9668 | Cc1ccc(n1)NC                      | C00330652 | -10.07 | -3.48 | -9.02  | 4.2   | -1.77 |
| 9669 | CC1=CCS(=O)(=O)C1                 | C00394514 | -10.07 | -1.07 | -15.8  | 7.32  | -0.52 |
| 9670 | c1ccc2c(c1)CC[C@H]2O              | C00901099 | -10.07 | -1.41 | -9.49  | 3.07  | -2.24 |
| 9671 | c1cn2cnnc2c(=O)[nH]1              | C01566214 | -10.07 | -3.95 | -19.14 | 15.2  | -2.18 |
| 9672 | Cc1cc2ncnn2cn1                    | C01571373 | -10.07 | -1.33 | -13.58 | 5.71  | -0.87 |
| 9673 | c1cc([nH]c1)c2ccc[nH]2            | C01581224 | -10.07 | 1.36  | -15.74 | 4.1   | 0.21  |
| 9674 | CNc1ncc(c(n1)N)N                  | C01639691 | -10.07 | -2.5  | -12.74 | 5.29  | -0.12 |
| 9675 | C=CCSCCO=C                        | C01729233 | -10.07 | -2.25 | -11.56 | 5.09  | -1.36 |
| 9676 | COCC1nnc(s1)[S-]                  | C02511075 | -10.07 | -2.52 | -12.11 | 5.07  | -0.52 |
| 9677 | CCCOCC=C                          | C02539247 | -10.07 | -0.29 | -9.91  | 1.29  | -1.17 |
| 9678 | c1cc(oc1)C(=O)C(O)O               | C02559764 | -10.07 | -4.75 | -16.69 | 10.78 | 0.59  |
| 9679 | c1cc(c(c1)CC#N)O                  | C03133991 | -10.07 | -3.05 | -17.3  | 9.72  | 0.57  |
| 9680 | C[C@H]1CCNC1=O                    | C05226936 | -10.07 | -2.25 | -13.19 | 5.78  | -0.41 |
| 9681 | [C@H](C)C(O)C@H(F)(Cl)(F)C(F)(F)F | C08698274 | -10.07 | -2.01 | -8.94  | 4.07  | -3.2  |
| 9682 | Cc1c(=O)nc([nH]1)NN               | C08951610 | -10.07 | -2.78 | -15.93 | 6.55  | 2.08  |
| 9683 | Cc1cc([nH]1)OCC#N                 | C12398527 | -10.07 | -3.43 | -12.53 | 7.31  | -1.42 |
| 9684 | c1c[nH]c2c1cnc(c2)Br              | C14985684 | -10.07 | 1.84  | -14.43 | 5.12  | -2.59 |
| 9685 | c1ccc(cc1)Cc2nc([nH]2)N           | C15635599 | -10.07 | 0.2   | -12.02 | 6.11  | -4.35 |
| 9686 | C/C(=N)N/C(=N)N/C                 | C16978810 | -10.07 | -2.14 | -12.92 | 4.11  | 0.88  |
| 9687 | C[C@H](c1cccnc1)O                 | C21985760 | -10.07 | -2.42 | -13.06 | 5.24  | 0.18  |
| 9688 | c1c(c[nH]c(=O)c1)C#N              | C22995856 | -10.07 | -5.54 | -17.68 | 14.14 | -0.99 |
| 9689 | Cc1nc(cot1)C(=S)N                 | C30677881 | -10.07 | -1.81 | -17.07 | 8.51  | 0.31  |
| 9690 | c1cnc(c1)C(=O)NCC(F)(F)F          | C33029006 | -10.07 | 0.63  | -14.01 | 5.34  | -2.03 |
| 9691 | c1cc(c(c1)F)NC(=O)NN)F            | C00167739 | -10.06 | 0.16  | -18.1  | 8.67  | -0.79 |
| 9692 | COCc1ccc(cnn1)[O-]                | C00337143 | -10.06 | -2.19 | -16.55 | 8.05  | 0.63  |
| 9693 | Cc1c(c([nH]1)NN)Cl                | C01233068 | -10.06 | -4.43 | -9.14  | 3.87  | -0.36 |
| 9694 | C(#N)c1c([n+](on1)[O-])C#N        | C01304684 | -10.06 | -1.97 | -11.12 | 5.51  | -2.48 |
| 9695 | C1C(=O)CC(=O)NC1=O                | C01556431 | -10.06 | 0.79  | -18.83 | 7.05  | 0.93  |
| 9696 | C1C(=O)OCCO1=O                    | C01682843 | -10.06 | -2.27 | -12.84 | 6.7   | -1.65 |
| 9697 | c1c(c(=O)[nH]c(=O)[nH]1)C=N/NC=O  | C01702911 | -10.06 | -4.99 | -19.92 | 11.68 | 3.17  |
| 9698 | c1cc(coc1)OCC#N)Cl                | C01738561 | -10.06 | 0.07  | -14.85 | 6.43  | -1.72 |
| 9699 | CCc1ccc2c(c1)[nH]nn2              | C02534162 | -10.06 | -4.63 | -12.01 | 4.88  | 1.7   |
| 9700 | c1cc(c(c1)OC(F)(F)Cl)O            | C02540209 | -10.06 | -1.18 | -10.74 | 2.41  | -0.55 |
| 9701 | c1cc(c(c1)C(=O)Cl)F)F             | C02545325 | -10.06 | 1     | -14.3  | 5.75  | -2.51 |
| 9702 | C=CCCOCCBr                        | C04203465 | -10.06 | -1.7  | -9.84  | 1.83  | -0.35 |
| 9703 | CC[C@H](C)N=C=O                   | C04979173 | -10.06 | -0.34 | -10.81 | 1.81  | -0.72 |
| 9704 | [H]/N=C\C#N)/C(C#N)C#N            | C05012752 | -10.06 | -2.6  | -14.44 | 7.85  | -0.87 |
| 9705 | C(Br)[C@@H](CO)O                  | C05410102 | -10.06 | -3.94 | -11.49 | 3.84  | 1.52  |
| 9706 | CC1=CC(=O)O[C@H]1O                | C05766771 | -10.06 | -2.26 | -15.6  | 7.21  | 0.59  |
| 9707 | CCOC(=O)/C=C/C=C/C                | C08602915 | -10.06 | -0.48 | -8.88  | 3.75  | -4.44 |
| 9708 | Cc1cn(c(=O)[nH]1)S(=O)(=O)C       | C09193603 | -10.06 | -2.49 | -20.02 | 12.63 | -0.18 |
| 9709 | c1cc(c(c1)O)F)C#N)F               | C10336047 | -10.06 | 0.94  | -16.75 | 7.27  | -1.52 |
| 9710 | c1cnc1[C@H]2C[C@H]2C=O            | C12370897 | -10.06 | -0.88 | -13.36 | 7.54  | -3.36 |
| 9711 | Cc1cccc2c1[nH]nc2                 | C13497059 | -10.06 | -2.32 | -8.93  | 4.08  | -2.89 |
| 9712 | CC[N+](=O)[O-]                    | C13507190 | -10.06 | -0.85 | -11.23 | 3.89  | -1.87 |
| 9713 | CCCN1C(=O)CSC1=O                  | C15014963 | -10.06 | 1.25  | -13.47 | 4.55  | -2.39 |
| 9714 | CC(=O)OCC(C(F)(F)F)F              | C16158746 | -10.06 | -0.15 | -10.18 | 3.68  | -3.4  |
| 9715 | c1cc(coc1c2cn[nH]2)F              | C16429384 | -10.06 | 0.11  | -13.74 | 5.92  | -2.35 |
| 9716 | Cc1nc([nH]1)SCCO                  | C18039857 | -10.06 | -4.24 | -15.48 | 9.87  | -0.21 |

|      |                                        |           |        |       |        |       |       |
|------|----------------------------------------|-----------|--------|-------|--------|-------|-------|
| 9717 | CScc1nc(on)1CCl                        | C19090818 | -10.06 | -0.57 | -13.13 | 5.75  | -2.11 |
| 9718 | CC[C@H]1[C@@H](O)1C                    | C19260485 | -10.06 | -0.62 | -10.55 | 2.78  | -1.66 |
| 9719 | c1ccc2c(c1)C[C@H](O2)N=C=O             | C19428276 | -10.06 | -0.95 | -12.85 | 3.96  | -0.22 |
| 9720 | CCNc1nc(cs1)C                          | C21518939 | -10.06 | -0.63 | -10.95 | 3.99  | -2.47 |
| 9721 | c1c(c[nH]c(=O)c1F)Cl                   | C21981711 | -10.06 | -3.17 | -18.76 | 12.53 | -0.67 |
| 9722 | c1ccc2c(c1)cc(o2)C=O                   | C00158629 | -10.05 | -3.82 | -9.88  | 5.01  | -1.35 |
| 9723 | CN1CC1=C                               | C01600530 | -10.05 | -1.25 | -11.15 | 2.12  | 0.23  |
| 9724 | CCN(C)C=O                              | C01603722 | -10.05 | -1.12 | -13.41 | 5.32  | -0.85 |
| 9725 | c1c(cnc2c1nns2)Br                      | C01617946 | -10.05 | -2.12 | -15.45 | 4.66  | 2.86  |
| 9726 | CC(=O)C#C                              | C02039581 | -10.05 | -1.7  | -11.56 | 5.03  | -1.81 |
| 9727 | c1c(cnc1N)ClBr                         | C02582882 | -10.05 | -2    | -12.79 | 2.79  | 1.95  |
| 9728 | C/C(=C/c1cccc1)/[N+](=O)[O-]           | C04777940 | -10.05 | 0.26  | -13.34 | 5.21  | -2.18 |
| 9729 | C1COC(=S)N1                            | C05190638 | -10.05 | -1.05 | -13.83 | 2.89  | 1.95  |
| 9730 | CN1CCC(=O)N1                           | C05758016 | -10.05 | -1.79 | -14.05 | 5.34  | 0.44  |
| 9731 | C1COCC1=O                              | C12495988 | -10.05 | -0.4  | -12.73 | 3.56  | -0.48 |
| 9732 | CCOCC(=S)S                             | C13763871 | -10.05 | -1.15 | -10.41 | 3.99  | -2.48 |
| 9733 | C/C=C/C=C(C=O)N                        | C15274137 | -10.05 | -0.19 | -14.49 | 5.33  | -0.69 |
| 9734 | Cc1cc(ccc1F)OC(F)F                     | C16125803 | -10.05 | -0.77 | -7.06  | 1.52  | -3.74 |
| 9735 | c1cc(cnc1)C(=O)C=N/O                   | C17163781 | -10.05 | -0.2  | -16.79 | 8.03  | -1.1  |
| 9736 | CC(C)c1nc(no1)CCl                      | C19089866 | -10.05 | 1.59  | -13.1  | 3.76  | -2.31 |
| 9737 | CSc1ccc(cn1)N                          | C19951408 | -10.05 | 0.05  | -13.85 | 4.98  | -1.22 |
| 9738 | Cc1c(cncn1)C=O                         | C20443760 | -10.05 | -0.45 | -13.47 | 5.94  | -2.07 |
| 9739 | c1ccc(c(c1)NC(=O)NN)Cl                 | C00167741 | -10.04 | -1.48 | -13.06 | 5.55  | -1.06 |
| 9740 | c1ccc2c(c1)ncnn2                       | C00394801 | -10.04 | -3.05 | -13.37 | 6.49  | -0.11 |
| 9741 | CC[C@@H]1[C@@H](c1cccc1)O              | C00403955 | -10.04 | -1.39 | -10.1  | 2.88  | -1.44 |
| 9742 | c1c(c(=O)[nH]c(=O)[nH]1)C(F)(F)F       | C01036885 | -10.04 | -5.76 | -14.55 | 10.23 | 0.04  |
| 9743 | CC(=O)Nc1cc(c(c1)F)NF                  | C01574360 | -10.04 | -1.41 | -14.44 | 6.88  | -1.08 |
| 9744 | CC(C)[C@@H](C=C)O                      | C01615748 | -10.04 | -0.27 | -9.3   | 1.03  | -1.5  |
| 9745 | C[C@H]([C@H]([C@H](C)Cl)O              | C01762872 | -10.04 | -1.49 | -9.59  | 1.71  | -0.66 |
| 9746 | c1c(cc(c(c1)C#N)F)Cl                   | C02243325 | -10.04 | -0.83 | -10.72 | 4.58  | -3.67 |
| 9747 | c1cc2ccc2c(c1)O                        | C02510646 | -10.04 | -2.63 | -13.24 | 5.61  | 0.22  |
| 9748 | CCc1c(c[nH]1)C=O                       | C04243076 | -10.04 | -2.34 | -14.44 | 8.29  | -1.55 |
| 9749 | Cc1c(c([nH]1)N)C#N                     | C04353708 | -10.04 | -5.18 | -12.57 | 8.1   | -0.39 |
| 9750 | CC1SCCCS1                              | C04521671 | -10.04 | 0     | -8.2   | 1.95  | -3.79 |
| 9751 | c1c(c(nc(n1)NN)N)C(=O)NN               | C05580295 | -10.04 | -5.73 | -13.96 | 7.94  | 1.71  |
| 9752 | C{[C@](OC(F)(F)F)(F)Br}(F)F            | C08698309 | -10.04 | 0.39  | -10.35 | 1.98  | -2.05 |
| 9753 | CC(C)NC(=O)c1cn[nH]c1N                 | C14608624 | -10.04 | -4.31 | -12.07 | 6.4   | -0.07 |
| 9754 | CC(=O)c1ccc(nc1)C#N                    | C14981999 | -10.04 | 1.3   | -15.33 | 6.59  | -2.6  |
| 9755 | c1ncccc1[C@@H]2CO2                     | C19730644 | -10.04 | -3.26 | -10.64 | 5.19  | -1.32 |
| 9756 | c1cncc2c1ncc(c2)Cl                     | C00331567 | -10.03 | -0.6  | -10.56 | 3.89  | -2.75 |
| 9757 | Cc1cc2ccc2c(c1)F                       | C00403325 | -10.03 | -3.23 | -6.86  | 4.03  | -3.97 |
| 9758 | c1c(c(ncn1Cl)Cl)Cl                     | C01020140 | -10.03 | 1.98  | -14.16 | 2.32  | -0.17 |
| 9759 | c1cnc(nc1)N[C@@H](C(F)(F)F)O           | C01558269 | -10.03 | -4.05 | -10.21 | 4.94  | -0.71 |
| 9760 | Cc1nnc(s1)C                            | C01609484 | -10.03 | -1.58 | -12.43 | 5.68  | -1.7  |
| 9761 | CC(=O)C(C=O)C(=O)OC                    | C01667224 | -10.03 | 0.29  | -14.88 | 7.53  | -2.98 |
| 9762 | C1[C@@H]([C@H]([C@H]1)Cl)Cl            | C01677878 | -10.03 | 1.2   | -13.58 | 3.39  | -1.04 |
| 9763 | Cc1cc(ncn1)SC#N                        | C01680097 | -10.03 | -1.34 | -13.91 | 6.26  | -1.05 |
| 9764 | C(CCl)OC(=O)N                          | C01865419 | -10.03 | -1.26 | -14.92 | 5.33  | 0.81  |
| 9765 | c1ccn2cc(nc2c1)Cl                      | C02650735 | -10.03 | -1.77 | -14.43 | 6.9   | -0.74 |
| 9766 | C1CCC(=O)[C@@H](C1)Cl                  | C03860268 | -10.03 | 2.69  | -13.64 | 4.24  | -3.32 |
| 9767 | c1(c(nc([n+](c1N)[O-])N)N)[N+](=O)[O-] | C04824732 | -10.03 | -2.73 | -14.26 | 7.76  | -0.8  |
| 9768 | Cc1c[nH]c2c1nccn2                      | C06491788 | -10.03 | -4.46 | -12.2  | 8.49  | -1.87 |
| 9769 | c1c(=O)[nH]c(=S)[nH]n1                 | C08100917 | -10.03 | -3.01 | -14.57 | 7.8   | -0.25 |
| 9770 | c1cc2c(cc1Cl)oc(n2)N                   | C08614805 | -10.03 | -7.36 | -6.15  | 3.67  | -0.18 |
| 9771 | C1[C@@H]([C@H]([C@H]1)N)Br             | C08614815 | -10.03 | -0.26 | -10.59 | 2.06  | -1.25 |
| 9772 | C(c1nnc(o1)C(F)F)Cl                    | C08731344 | -10.03 | -2    | -12.46 | 4.09  | 0.34  |
| 9773 | C{[C@H]([C@H]([C@H]1)O)S               | C12341762 | -10.03 | -2.33 | -12.86 | 3.54  | 1.62  |
| 9774 | c1cnc(cc1[N+](=O)[O-])C#N              | C14982541 | -10.03 | -0.46 | -13    | 6.28  | -2.85 |
| 9775 | CNc1ncc(c1)Cl                          | C16124195 | -10.03 | -1.55 | -11.43 | 3.74  | -0.79 |
| 9776 | c1ccc(cc1)FNCCO                        | C20051177 | -10.03 | -2.98 | -11.49 | 4.95  | -0.51 |
| 9777 | c1cnc(nc1)SC#N                         | C00334397 | -10.02 | -1.99 | -12.04 | 6.11  | -2.1  |
| 9778 | c1c(c(n1)CCO)N(C(=O)N                  | C00399507 | -10.02 | -5.74 | -16.62 | 7.62  | 4.72  |
| 9779 | Cc1ccccc1OC(=O)C                       | C01095311 | -10.02 | -0.55 | -10.42 | 5.76  | -4.81 |
| 9780 | c1c(=O)[nH]c(=O)[nH]c1Br               | C01597571 | -10.02 | -1.25 | -16.7  | 5.25  | 2.69  |
| 9781 | c1cc2c(cc1Cl)scn2                      | C01605362 | -10.02 | -2.24 | -12.03 | 3.85  | 0.61  |
| 9782 | C=CCC#N                                | C01641012 | -10.02 | -0.65 | -11.49 | 4.53  | -2.4  |
| 9783 | CC[C@H]1(C(=O)O1)Br                    | C01729752 | -10.02 | -0.43 | -9.2   | 1.94  | -2.34 |
| 9784 | Cn1cc(ccc1=O)C#N                       | C01845712 | -10.02 | -1.84 | -14.7  | 8.38  | -1.86 |
| 9785 | C[C@@H]([C@H]([C@H]1)Cl)O              | C01850593 | -10.02 | -1.56 | -8.78  | 3.1   | -2.78 |
| 9786 | COCCSC                                 | C02167500 | -10.02 | -0.79 | -10.61 | 1.7   | -0.32 |
| 9787 | CCOcn1ccnc1Cl                          | C02510763 | -10.02 | -2.27 | -9.3   | 4.13  | -2.58 |
| 9788 | COCCc1ccc(cc1)O                        | C02566176 | -10.02 | 0.11  | -11.81 | 3.25  | -1.57 |
| 9789 | Cc1ccc(c(c1F)O)Cl                      | C02574987 | -10.02 | 0.69  | -14.27 | 3.68  | -0.11 |
| 9790 | CC[C@@H](C(=O)C)S                      | C04802621 | -10.02 | -0.49 | -11.04 | 4.15  | -2.65 |
| 9791 | C1=C[C@@H]([C@@H]([C@H]1)Cl)O          | C04978595 | -10.02 | -1.83 | -15.06 | 4.07  | 2.8   |
| 9792 | CC(=O)NCCSC(=NH2+)N                    | C05378213 | -10.02 | -0.57 | -19.33 | 6.52  | 3.36  |
| 9793 | c1[nH]c2c(n1)c(ncn2)Br                 | C05783717 | -10.02 | -4.47 | -10.38 | 7.72  | -2.89 |
| 9794 | CC(C)OCCCl                             | C06645507 | -10.02 | 0.14  | -9.67  | 2.31  | -2.78 |
| 9795 | Cc1ccc(ccn1)Br                         | C12359508 | -10.02 | 1.41  | -10.68 | 2.3   | -3.05 |
| 9796 | c1ccnc(c1)[C@@H]([C@@H]2[C@H](O2)C#N   | C13213068 | -10.02 | -4.24 | -9.08  | 5.19  | -1.89 |
| 9797 | C1COC[C@H]1Cl                          | C14983073 | -10.02 | 0.45  | -9.54  | 1.68  | -2.6  |
| 9798 | CS/C(=N/O)/C=N/O                       | C17125528 | -10.02 | -0.54 | -15.08 | 3.86  | 1.73  |
| 9799 | COC(=O)Cn1c(ncn1)N                     | C18192103 | -10.02 | -1.63 | -17.96 | 11.35 | -1.78 |
| 9800 | c1ccc(ccc1)C(=O)F                      | C19729346 | -10.02 | -1.95 | -10.59 | 4.87  | -2.3  |
| 9801 | CN(C)c1cc[nH+]c(c1)F                   | C21990753 | -10.02 | -1.82 | -10.26 | 4.42  | -2.42 |
| 9802 | c1cc2c(cc1CO)CC2                       | C22013201 | -10.02 | -2.28 | -10.74 | 5.21  | -2.22 |
| 9803 | C1[C@H]([C@H]([C@H]1)Cl)CS             | C32628463 | -10.02 | 1.08  | -9.64  | 2.21  | -3.68 |
| 9804 | c1ccc(c(c1)F)C(=O)N)N                  | C00154077 | -10.01 | -2.32 | -15.86 | 7.33  | 0.83  |
| 9805 | CCOC(=O)CC#N                           | C00164473 | -10.01 | -1.47 | -14.8  | 8.93  | -2.66 |
| 9806 | COC(=O)Cc1ccc(cc1)Cl                   | C00398512 | -10.01 | -2.16 | -11.23 | 5.31  | -1.93 |

|      |                                    |           |        |       |        |       |       |
|------|------------------------------------|-----------|--------|-------|--------|-------|-------|
| 9807 | c1c(cc(c(c1O)Br)O)O                | C01609435 | -10.01 | -2.19 | -15.04 | 4.78  | 2.44  |
| 9808 | C(C(CCI)O)Cl                       | C01696572 | -10.01 | -0.34 | -12.92 | 4.08  | -0.83 |
| 9809 | CCCC(=O)[C@@H](C)O                 | C02527911 | -10.01 | -1.69 | -10.46 | 3.81  | -1.67 |
| 9810 | CCCC#CCCC                          | C02579172 | -10.01 | -1.86 | -8.91  | 2.72  | -1.96 |
| 9811 | C1[C@@@H](S[C]C@H)(S1)O)O          | C03861336 | -10.01 | -3.51 | -11.17 | 2.81  | 1.87  |
| 9812 | c1nc2c(c(n1)[O-])n[nH]n2           | C04429559 | -10.01 | -5.23 | -20.19 | 14.69 | 0.72  |
| 9813 | c1nc(no1)c2c(non2)[N+](=O)[O-]     | C04844055 | -10.01 | -0.56 | -14.42 | 6.49  | -1.52 |
| 9814 | C[C@@@H]1CC=C[C@H](C1)O            | C05809803 | -10.01 | -1.11 | -9.15  | 1.78  | -1.53 |
| 9815 | CCCCOP(O)O                         | C05973697 | -10.01 | -3.03 | -13.21 | 5.12  | 1.11  |
| 9816 | CC(C)CNC(=O)O                      | C15894359 | -10.01 | -3.34 | -12.03 | 4.58  | 0.78  |
| 9817 | C[C@@@H]1[C@H](O1)[C@H]2[C@H](O)C2 | C17003126 | -10.01 | 0.61  | -13.13 | 3.04  | -0.53 |
| 9818 | Cc1cc(cnc1N)Br                     | C19735096 | -10.01 | 0.29  | -12.04 | 3.83  | -2.09 |
| 9819 | Cc1ccc(c(c1)F)Nc                   | C20359878 | -10.01 | -1.91 | -7.68  | 2.64  | -3.06 |
| 9820 | c1cc(cc(c1)Cl)OC(=O)N              | C32603037 | -10.01 | -1.37 | -15.73 | 7.79  | -0.7  |
| 9821 | CCC/C=C/O                          | C01531148 | -10    | -0.48 | -12.46 | 4.55  | -1.61 |
| 9822 | COc1ccc(o1)[N+](=O)[O-]            | C01591770 | -10    | 0.32  | -14.92 | 6.87  | -2.27 |
| 9823 | CCc1c(coc1[O-])O                   | C02046320 | -10    | 1.05  | -13.45 | 4.7   | -2.29 |
| 9824 | CO[C@@@](C(=O)N)(C(F)F)F           | C03123722 | -10    | -1.94 | -12.33 | 3.86  | 0.41  |
| 9825 | CCSc1nc(ns1)N                      | C04290487 | -10    | -3.39 | -9.31  | 4.81  | -2.11 |
| 9826 | COC(F)F                            | C05701046 | -10    | -0.6  | -10.27 | 1.36  | -0.49 |
| 9827 | c1cn(c(n1)C)C(F)F                  | C09200828 | -10    | -2.21 | -11.04 | 6.38  | -3.14 |
| 9828 | c1cc2c(cc1Cl)oc(n2)[O-]            | C13463739 | -10    | -6.93 | -8.56  | 7.35  | -1.87 |
| 9829 | Cc1cc2c(ccnH2)cn1                  | C15021972 | -10    | 1.43  | -13.88 | 5.11  | -2.67 |
| 9830 | c1cc(cc(c1O)/C=N/O)O               | C15046774 | -10    | -1.4  | -17.03 | 5.86  | 2.57  |
| 9831 | C1C[C@H](C)C[C@H]2[C@H]1C2)O       | C17059382 | -10    | -0.86 | -9.07  | 1.62  | -1.69 |
| 9832 | c1cn2ccc2cc1O                      | C18559358 | -10    | -3.78 | -12.38 | 7.79  | -1.63 |
| 9833 | c1cn(c[nH]1)CCO                    | C19926709 | -10    | -5.13 | -13.27 | 7.75  | 0.66  |
| 9834 | CNC(=O)c1ccc(c(c1)N)F              | C21953393 | -10    | -2.74 | -15.15 | 8.39  | -0.5  |
| 9835 | COC(=O)C(=O)NN                     | C31775914 | -10    | -2.14 | -15.59 | 6.85  | 0.88  |
| 9836 | C[C@H](C)C(=O)c1cccs1              | C32005445 | -10    | -0.49 | -9.58  | 3.58  | -3.51 |
| 9837 | Cn1cc(c(n1)C(=O)OC                 | C32777199 | -10    | 0.27  | -14.31 | 6.31  | -2.28 |
| 9838 | Cc1c(ccc1)CO                       | C00159615 | -9.99  | -1.29 | -12.72 | 4.55  | -0.53 |
| 9839 | C1CC(=O)C(=C1)CO                   | C01568570 | -9.99  | -1.98 | -14.42 | 5.32  | 1.09  |
| 9840 | CN(C)C=S                           | C01594591 | -9.99  | -2.6  | -11.48 | 6.02  | -1.93 |
| 9841 | C=CN1C(=O)CCC1=O                   | C01596359 | -9.99  | -2.02 | -13.03 | 6.97  | -1.91 |
| 9842 | C(Cl)OC(=O)N                       | C01669927 | -9.99  | -3.35 | -13.97 | 4.94  | 2.4   |
| 9843 | Cc1ccc(c(c1)OCC=C                  | C01679842 | -9.99  | -1.36 | -9.68  | 2.64  | -1.59 |
| 9844 | c1cc(ccc1NS(=O)(=O)O)Cl            | C01732183 | -9.99  | -7.2  | -12.26 | 8.49  | 0.99  |
| 9845 | CCOC1cc(ccc1N)F                    | C02527708 | -9.99  | -1.6  | -9.12  | 2.86  | -2.14 |
| 9846 | c1c(cc(c(c1F)F)C=O                 | C02575049 | -9.99  | -2.8  | -10.62 | 6.29  | -2.86 |
| 9847 | C(CBr)C#N                          | C03860883 | -9.99  | 0.11  | -11.91 | 4.28  | -2.47 |
| 9848 | c1c(cnc2c1[nH](c2)N)Cl             | C03908916 | -9.99  | -3.62 | -9.45  | 5.76  | -2.68 |
| 9849 | C1C[C@@@H](CC=C1)C#N               | C04411093 | -9.99  | -0.12 | -11.07 | 4.8   | -3.59 |
| 9850 | C1C[C@H](OC=C1)C#N                 | C05191551 | -9.99  | 1.18  | -13.52 | 4     | -1.66 |
| 9851 | Cc1c(oc(=S)[nH]1)C                 | C06069108 | -9.99  | -1.3  | -13.67 | 4.11  | 0.88  |
| 9852 | Cc1c(c(ncn1)NN)N                   | C08615123 | -9.99  | -2.28 | -13.33 | 5.67  | -0.05 |
| 9853 | CC(=O)Oc1ccc(nn1)[O-]              | C08617519 | -9.99  | -1.53 | -21.49 | 11.57 | 1.47  |
| 9854 | CC(=O)[C@H]1[C@@@H](O1)c2cccnc2    | C13213330 | -9.99  | -2.85 | -13.62 | 8.8   | -2.31 |
| 9855 | c1cc(ccc1C(=NH2+)NO)Br             | C16082759 | -9.99  | -1.68 | -11.9  | 4.74  | -1.15 |
| 9856 | CCc1nnc(o1)N                       | C17289973 | -9.99  | -2.44 | -13.78 | 3.96  | 2.26  |
| 9857 | c1c(nc(s1)N)CCC                    | C19091546 | -9.99  | -3.21 | -12.79 | 4.87  | 1.14  |
| 9858 | c1cc(cc(c1F)F)C#CCO                | C22203395 | -9.99  | -1.03 | -13.45 | 6.8   | -2.31 |
| 9859 | c1cc(cc(c1)OC(F)F)F)F)F)N          | C31176446 | -9.99  | -0.52 | -12.19 | 4.44  | -1.73 |
| 9860 | c1ccc(cc1)C(=O)N)F                 | C00039562 | -9.98  | -4.15 | -14.44 | 9.6   | -0.99 |
| 9861 | Cc1cccc(n1)C                       | C00967330 | -9.98  | -1.85 | -8.45  | 3.36  | -3.04 |
| 9862 | CC(=O)C1CC1                        | C01577097 | -9.98  | -0.68 | -10.43 | 3.76  | -2.61 |
| 9863 | c1c(onc1[N+](=O)[O-])C=O           | C01618618 | -9.98  | -4.98 | -12.29 | 10.16 | -2.87 |
| 9864 | CCOP@@@1OC[C@H](O1)C               | C01667514 | -9.98  | 0.77  | -12.46 | 4.09  | -2.38 |
| 9865 | COc1ccc(c(c1)C=O                   | C01676373 | -9.98  | -3.22 | -9.02  | 4.92  | -2.67 |
| 9866 | CCC(=O)NCCO                        | C01687366 | -9.98  | -3.15 | -14.92 | 6.58  | 1.51  |
| 9867 | CCC#CCCO                           | C02015917 | -9.98  | -2.08 | -9.45  | 2.87  | -1.33 |
| 9868 | C[C@H](C)SC)O                      | C02043068 | -9.98  | -0.7  | -11.51 | 2.85  | -0.61 |
| 9869 | c1ccc(cc1)OCC=C(C(F)F)F            | C02530942 | -9.98  | -2.86 | -4.75  | 2.56  | -4.93 |
| 9870 | Cn1ccc(n1)C=O                      | C02731920 | -9.98  | -2.32 | -15.45 | 9.36  | -1.56 |
| 9871 | c1c(n(cn1)C)CO[N+](=O)[O-]         | C03091270 | -9.98  | -2.89 | -14.64 | 6.87  | 0.67  |
| 9872 | c1cc2c(nc1)onc2Br                  | C03852685 | -9.98  | 0.86  | -16.57 | 6.75  | -1.02 |
| 9873 | c1cnccc1C(=O)c2[nH]cn2             | C04243446 | -9.98  | -0.38 | -13.26 | 6.4   | -2.73 |
| 9874 | c1cc(oc1)[C@@@H](C(F)F)F)O         | C04290173 | -9.98  | -1.04 | -11.65 | 3.7   | -1    |
| 9875 | CC1=C[P@@@](=O)(CC1)O              | C05767716 | -9.98  | -2.89 | -13.3  | 6.42  | -0.21 |
| 9876 | c1(=S)[nH]nc2n1nc(s2)[S-]          | C06494853 | -9.98  | -3.73 | -13.21 | 5.92  | 1.04  |
| 9877 | C1CC(=O)NCC1=O                     | C16698297 | -9.98  | 0.28  | -16.49 | 6.27  | -0.05 |
| 9878 | C(=S)(N)NNC(=S)S                   | C16911639 | -9.98  | -3.04 | -15.3  | 9.64  | -1.27 |
| 9879 | CC(C)NCC#N                         | C19404245 | -9.98  | -0.57 | -12.54 | 4.26  | -1.13 |
| 9880 | c1cc(oc1)CNCC(F)F)F                | C20268151 | -9.98  | -1.42 | -10.94 | 4.38  | -2.01 |
| 9881 | c1cc(cc(c(c1)F)Nc(=O)N)F           | C20476338 | -9.98  | -0.9  | -19.27 | 10.82 | -0.62 |
| 9882 | c1cc(cc(c1)Br)Cl)O                 | C26896114 | -9.98  | -3.4  | -7.51  | 2.97  | -2.04 |
| 9883 | c1cncc(c1Br)C(F)F)F                | C30714826 | -9.98  | -2.77 | -6.93  | 2.84  | -3.12 |
| 9884 | c1ccc2c(c1)NC(N2)CO                | C00406149 | -9.97  | -4.98 | -14.1  | 4.67  | 4.44  |
| 9885 | CC(=O)Nc1ccc(c(c1)N)F              | C01595336 | -9.97  | -1.03 | -15.03 | 7.14  | -1.04 |
| 9886 | c1c(nc([nH]c1=O)[O-])C(F)F)F       | C01665341 | -9.97  | -2.45 | -12.88 | 5.2   | 0.17  |
| 9887 | c1ccc(cc1)CC(=O)CCI                | C01670907 | -9.97  | 0.17  | -15.55 | 6.58  | -1.18 |
| 9888 | Cn1cc(c(=O)[nH]c1=O)N              | C01674640 | -9.97  | -0.52 | -19.11 | 7.56  | 2.1   |
| 9889 | C=CCNC(=S)NN                       | C01701820 | -9.97  | -1.5  | -15.15 | 7.86  | -1.18 |
| 9890 | CCCCS(=O)N                         | C01737529 | -9.97  | -0.63 | -12.4  | 3.78  | -0.72 |
| 9891 | c1cc(cc(c1SC#N)[N+](=O)[O-])N      | C04014529 | -9.97  | -3    | -9.3   | 5.15  | -2.83 |
| 9892 | C(=O)(C(F)F)N                      | C04290136 | -9.97  | -3.42 | -13.49 | 6.67  | 2.26  |
| 9893 | C1CC(=O)NCC1=O                     | C04428982 | -9.97  | -4.72 | -15.01 | 6.41  | 3.35  |
| 9894 | C([C@@@H])([N+](=O)[O-])Br)O       | C05131846 | -9.97  | -1.31 | -13.51 | 5.21  | -0.36 |
| 9895 | C(C#N)N=[N+]=[N-]                  | C05188385 | -9.97  | -3.03 | -11.47 | 5.49  | -0.96 |
| 9896 | C[C@H](C=C)n1ccnc1                 | C05503517 | -9.97  | -1.75 | -8.27  | 4.23  | -4.18 |

|      |                                            |           |       |       |        |       |       |
|------|--------------------------------------------|-----------|-------|-------|--------|-------|-------|
| 9897 | c1c(c([nH]n1)[n+]2nc(on2)[O-])[N+](=O)[O-] | C06188121 | -9.97 | -2.07 | -18.48 | 9.77  | 0.8   |
| 9898 | C(COCC(F)F)C#N                             | C08698325 | -9.97 | -0.51 | -12.94 | 5.9   | -2.43 |
| 9899 | CCO/C=C/C(=O)C(F)F                         | C08698358 | -9.97 | -0.77 | -12.06 | 6.57  | -3.71 |
| 9900 | C[C@H](C[C@H](C)O)O                        | C12359922 | -9.97 | -1.17 | -11.77 | 2.5   | 0.47  |
| 9901 | COC(=O)Cn1cc(cn1)N                         | C19810522 | -9.97 | -0.98 | -17.7  | 9.69  | -0.98 |
| 9902 | CC[C[NH2+]]CC(=O)OC                        | C19885652 | -9.97 | -1.37 | -10.89 | 3.9   | -1.6  |
| 9903 | C(C(F)F)F)NN                               | C20518386 | -9.97 | -1.72 | -12.47 | 4.39  | -0.17 |
| 9904 | c1cc(cc(c1)O)CCO                           | C00395670 | -9.96 | -2.81 | -11.5  | 3.93  | 0.4   |
| 9905 | C#CCOC(=O)c1ccccc1                         | C01581468 | -9.96 | 2.32  | -12.57 | 5.42  | -5.13 |
| 9906 | CCOC#C[C@@H](C)O                           | C01605344 | -9.96 | -1.92 | -12.98 | 4.84  | 0.1   |
| 9907 | c1cc(c(cc1C(F)F)N)F                        | C01706172 | -9.96 | -3.43 | -7.14  | 2.16  | -1.56 |
| 9908 | c1(c(nc([nH]1)Br)Cl)Cl                     | C01757466 | -9.96 | -2.58 | -11.42 | 2.65  | 1.39  |
| 9909 | C1C[C@@H](C=C1)C#N                         | C02032340 | -9.96 | 0.78  | -12.85 | 3.93  | -1.81 |
| 9910 | c1c(con1)CCCO                              | C02559655 | -9.96 | -3.36 | -11.51 | 5.34  | -0.43 |
| 9911 | CC(=O)[C@H](C(=O)OC)Cl                     | C02568011 | -9.96 | -1.64 | -12.4  | 6.61  | -2.53 |
| 9912 | c1ccc(cc1)[C@@H]2[C@H](O2)CO               | C02597084 | -9.96 | -2.77 | -11.81 | 5.42  | -0.79 |
| 9913 | C(#N)C(Cl)Cl                               | C03860796 | -9.96 | 0.01  | -8.25  | 0.87  | -2.6  |
| 9914 | CC(CS)CS                                   | C04353093 | -9.96 | -0.46 | -8.11  | 1.41  | -2.8  |
| 9915 | c1cc(nc2c1[nH]c(=O)[nH]2)N                 | C05818840 | -9.96 | -5.24 | -14.86 | 9.67  | 0.46  |
| 9916 | Cc1cccn1CCO                                | C05885732 | -9.96 | -4.07 | -10.11 | 3.43  | 0.78  |
| 9917 | c1cc(c(c(c1)F)F)C(=NH2+)NO                 | C06234852 | -9.96 | -3.15 | -15.82 | 8.68  | 0.32  |
| 9918 | C(=O)(C(F)F)NNC(=S)N                       | C08731348 | -9.96 | -0.4  | -19.24 | 10    | -0.32 |
| 9919 | c1cc(ccc1/C(=N)O)/N)N                      | C12647936 | -9.96 | -4.16 | -12.2  | 5.56  | 0.84  |
| 9920 | C(C(F)F)F(C(F)F)N                          | C16082651 | -9.96 | -1.71 | -10.28 | 2.52  | -0.49 |
| 9921 | c1cnccc1/C(=N)O)/C#N                       | C17328107 | -9.96 | -1.12 | -13.15 | 4.84  | -0.53 |
| 9922 | c1(c(=O)[nH]c(nc1[O-])N)N                  | C18156496 | -9.96 | -5.66 | -16.69 | 8.39  | 4     |
| 9923 | COC(=O)Nc1ccc(cc1)O                        | C20212818 | -9.96 | 0.03  | -19.84 | 9.71  | 0.14  |
| 9924 | C1C[NH2+][C@@H]1C(F)F                      | C20380768 | -9.96 | 0.07  | -11.69 | 1.89  | -0.22 |
| 9925 | c1cnccc1C#CCO                              | C22203546 | -9.96 | -1.18 | -15.09 | 7.14  | -0.83 |
| 9926 | Cn1c(cc(n1)COC)N                           | C26512024 | -9.96 | -2.3  | -14.41 | 7.2   | -0.45 |
| 9927 | c1ccc2c(c1)nc(s2)Cl                        | C00152274 | -9.95 | -0.97 | -13.73 | 4.24  | 0.52  |
| 9928 | Cn1cc2cccc2n1                              | C00331078 | -9.95 | -2.67 | -11.09 | 7.23  | -3.42 |
| 9929 | C1CCN(C1)C(=O)Cl                           | C00407001 | -9.95 | 2.81  | -15.02 | 4.14  | -1.87 |
| 9930 | COC(=C)C(=C)OC                             | C00409235 | -9.95 | -0.49 | -10.43 | 2.73  | -1.76 |
| 9931 | c1(c(c(nc1Cl)Cl)Cl)N                       | C00967313 | -9.95 | -4.99 | -9.1   | 3.02  | 1.12  |
| 9932 | Cn1c(c(cn1)Br)[N+](=O)[O-]                 | C00987400 | -9.95 | -1.19 | -8.79  | 3.47  | -3.45 |
| 9933 | COC(=O)Cn1cnc(n1)[N+](=O)[O-]              | C01085585 | -9.95 | -5.85 | -14.29 | 15.95 | -5.76 |
| 9934 | CNc1cccc1O                                 | C01672894 | -9.95 | -2.31 | -10.24 | 3.07  | -0.48 |
| 9935 | C[C@@H](C(=O)S)O                           | C02043774 | -9.95 | -2.49 | -12.85 | 5.37  | 0.02  |
| 9936 | CNC(=S)C(=S)NC                             | C02274048 | -9.95 | -2.08 | -10.41 | 1.96  | 0.58  |
| 9937 | c1cnccc1C=O                                | C02511465 | -9.95 | -2.33 | -16.52 | 9.14  | -0.23 |
| 9938 | c1cc(c(c(c1N)F)Cl)Cl                       | C02525756 | -9.95 | -2.7  | -8.27  | 3.47  | -2.45 |
| 9939 | CCOCC/C(=N)O)/N                            | C02547259 | -9.95 | -2.93 | -12.67 | 4.79  | 0.85  |
| 9940 | C[C@@H](CCS)O                              | C04533096 | -9.95 | -1.4  | -11.81 | 1.71  | 1.55  |
| 9941 | CC(=O)S/C=C/C(=O)C                         | C04721537 | -9.95 | -0.36 | -12.01 | 5.45  | -3.02 |
| 9942 | CC[C@H](C=C)C(O)O                          | C04934049 | -9.95 | -0.15 | -9.92  | 1.5   | -1.38 |
| 9943 | CCc1cnc([nH]c1=O)N                         | C05115181 | -9.95 | -2.97 | -16.21 | 6.45  | 2.78  |
| 9944 | C1C2c2c(sc(n2)NN)C1                        | C07881333 | -9.95 | -2.66 | -10.94 | 5.46  | -1.81 |
| 9945 | c1cnc(c(c1)F)F)N)Cl                        | C11919470 | -9.95 | 1.22  | -12.16 | 2.81  | -1.82 |
| 9946 | c1c2c(cc(c1F)F)[nH]c(=O)[nH]2              | C12505871 | -9.95 | -2.16 | -12.08 | 5.52  | -1.24 |
| 9947 | C1[C@@H]2C=C[C@H](C@@H)(O1)O2)O            | C14987555 | -9.95 | -1.79 | -13.63 | 4.35  | 1.11  |
| 9948 | CCOC(=O)c1cccn1                            | C16697860 | -9.95 | 3.08  | -14.61 | 4.85  | -3.27 |
| 9949 | c1cc(ccc1C2c2cnc2N)F                       | C19785804 | -9.95 | -0.41 | -13.43 | 7.77  | -3.88 |
| 9950 | c1csc1CNC#N                                | C22076644 | -9.95 | -2.24 | -11.83 | 6.11  | -1.99 |
| 9951 | c1cc(nc(c1)Cl)NN                           | C00168495 | -9.94 | -4.04 | -9.62  | 4.96  | -1.25 |
| 9952 | Cc1c(c(=O)cc([nH]1)[O-])                   | C00494717 | -9.94 | -3.26 | -13.24 | 5.33  | 1.22  |
| 9953 | CC[C@H](C(=O)CC)O                          | C00901574 | -9.94 | -2.45 | -9.56  | 3.88  | -1.81 |
| 9954 | CC1=C(C(=O)OC)1C                           | C01585192 | -9.94 | -1.43 | -13.12 | 7.52  | -2.92 |
| 9955 | CCOC[C@H](C)O                              | C01640885 | -9.94 | -0.22 | -12.73 | 3.15  | -0.13 |
| 9956 | c1ccc(cc1)OCC=O                            | C01681320 | -9.94 | 1.02  | -12.87 | 4.79  | -2.88 |
| 9957 | c1cc(cc2c1ccnn2)F                          | C01704364 | -9.94 | -1.73 | -12.39 | 7.07  | -2.89 |
| 9958 | C(C(F)F)OC(F)F                             | C02576918 | -9.94 | -0.37 | -12.21 | 4.03  | -1.4  |
| 9959 | c1cc(cnc1)C(=O)c2[nH]ccn2                  | C04243445 | -9.94 | 1.31  | -15.26 | 6.82  | -2.8  |
| 9960 | c1c[nH]c(nc1=S)[O-]                        | C05117659 | -9.94 | -2.26 | -16.43 | 5.05  | 3.71  |
| 9961 | c1cc(oc1)/C=C/C(=O)NN                      | C05676645 | -9.94 | 0.1   | -21.06 | 7.45  | 3.57  |
| 9962 | COc1ccc(nn1)NN                             | C10151793 | -9.94 | -3.61 | -14.47 | 7.02  | 1.12  |
| 9963 | c1ccc(cc1)NCCC#N                           | C12376742 | -9.94 | -1.55 | -10.93 | 6.21  | -3.67 |
| 9964 | c1c(cnc(c1N)N)I                            | C14007799 | -9.94 | -0.4  | -14.23 | 5.29  | -0.59 |
| 9965 | Cc1cc(cnc1)C=O                             | C14983272 | -9.94 | -0.7  | -13.13 | 6.26  | -2.37 |
| 9966 | C/[NH+]=C/c1ccccc1[O-]                     | C16991557 | -9.94 | -1.81 | -11.04 | 3.98  | -1.07 |
| 9967 | c1ccc(c(c1)O)[C@@H](C(=O)[NH2+])N)F        | C19437723 | -9.94 | 0.85  | -19.12 | 9.71  | -1.37 |
| 9968 | c1cc(nc(c1N)Sc2[nH]cn2                     | C19845527 | -9.94 | -1.52 | -14.35 | 8.16  | -2.23 |
| 9969 | COC(=O)c1[nH]ccn1                          | C22011174 | -9.94 | -1.38 | -14.04 | 7.08  | -1.6  |
| 9970 | CN(C)c1ncc(s1)CCl                          | C32006952 | -9.94 | 0.02  | -10.64 | 4.27  | -3.59 |
| 9971 | C1[C@@H]2C=CC(=O)[C@H]1C=CC2=O             | C00164014 | -9.93 | -0.05 | -12.02 | 5.23  | -3.1  |
| 9972 | C1C(=O)N(C(=S)S)1N                         | C01083111 | -9.93 | -0.6  | -15.2  | 6.81  | -0.95 |
| 9973 | C1COCOCO1                                  | C01603521 | -9.93 | -0.59 | -13.26 | 3.07  | 0.85  |
| 9974 | C1=C/C=C[C@H]2[C@H](O2)/C=C1               | C01646309 | -9.93 | -1.6  | -11.19 | 2.51  | 0.34  |
| 9975 | CCCC[N+](=O)[O-]                           | C01666924 | -9.93 | -0.38 | -11.8  | 3.36  | -1.11 |
| 9976 | C1(=[N+]([O-])[O-])C(=O)NC(=O)N=C1[O-]     | C01680671 | -9.93 | 2.06  | -20.4  | 6.56  | 1.86  |
| 9977 | C[C@@H]1CC=C(C1=O)C                        | C02038157 | -9.93 | -0.97 | -10.77 | 5.15  | -3.34 |
| 9978 | Cc1cc(nn1C)N                               | C02537814 | -9.93 | -2.48 | -11.73 | 5.44  | -1.16 |
| 9979 | c1ccc(cc1)/C=C/[P@@H](=O)[O-]              | C03958322 | -9.93 | -3.53 | -13.19 | 8.76  | -1.98 |
| 9980 | C1CC1C(=O)O)/N=C/c2c(non2)N)N              | C04349472 | -9.93 | -2.24 | -10.38 | 5.43  | -2.74 |
| 9981 | CO[C@H]1CCCC=C1                            | C05124667 | -9.93 | -1.42 | -9.53  | 1.51  | -0.49 |
| 9982 | c1ccc(cc1)C=NNC(=O)N                       | C08579559 | -9.93 | -0.16 | -16.09 | 7.33  | -1.02 |
| 9983 | CNC(=O)[C@H](F)I                           | C08698290 | -9.93 | 0.16  | -13.77 | 4.36  | -0.67 |
| 9984 | c1ccc(cc1)/C(=N)O)/N                       | C12375727 | -9.93 | -0.69 | -15.71 | 7.2   | -0.72 |
| 9985 | c1c(c([nH]n1)C(=O)NN)[N+](=O)[O-]          | C18166902 | -9.93 | -4.55 | -17.19 | 11.44 | 0.37  |
| 9986 | CC(=O)Cc1cnccc1                            | C19088351 | -9.93 | -1.77 | -14.53 | 8.17  | -1.8  |

|       |                                    |           |       |       |        |      |       |
|-------|------------------------------------|-----------|-------|-------|--------|------|-------|
| 9987  | <chem>CCC[C@H](C=C)O</chem>        | C20231667 | -9.93 | -0.49 | -9.7   | 2.27 | -2.01 |
| 9988  | <chem>c1cc(nc(c1)Cl)CCl</chem>     | C21985748 | -9.93 | -0.49 | -10.48 | 4.42 | -3.37 |
| 9989  | <chem>CCOC(=O)N1C(=O)CSC1=O</chem> | C32594599 | -9.93 | 2.33  | -18.06 | 8.86 | -3.06 |
| 9990  | <chem>CC(=C)C(=O)NCO</chem>        | C01641091 | -9.92 | -3.95 | -15.57 | 7.04 | 2.56  |
| 9991  | <chem>c1ccc(c(c1)N)NCC#N</chem>    | C01675044 | -9.92 | -3.83 | -9.63  | 5.07 | -1.53 |
| 9992  | <chem>CCOC(=O)C1=CCCC1</chem>      | C01711930 | -9.92 | 2.78  | -12.1  | 3.81 | -4.41 |
| 9993  | <chem>C/C=C/C=C/O</chem>           | C01733897 | -9.92 | 0.11  | -12.49 | 5.49 | -3.02 |
| 9994  | <chem>C=C[C@@H]1CO1</chem>         | C02040168 | -9.92 | -0.48 | -11.49 | 2.83 | -0.78 |
| 9995  | <chem>c1c(cc(c(c1F)C=O)F)Cl</chem> | C02243321 | -9.92 | -0.17 | -11.5  | 3.85 | -2.1  |
| 9996  | <chem>COCN=C=S</chem>              | C02528107 | -9.92 | -1.39 | -11.44 | 2.19 | 0.72  |
| 9997  | <chem>c1ccn(c1)CC/C(=N\O)/N</chem> | C02547394 | -9.92 | -2.91 | -12.06 | 6.07 | -1.02 |
| 9998  | <chem>C=CCOCC(C(F)(F)F)(F)F</chem> | C02576922 | -9.92 | -1.17 | -7.66  | 2.52 | -3.61 |
| 9999  | <chem>C1C(C(CO1)(F)F)(F)F</chem>   | C02576928 | -9.92 | -0.49 | -11.12 | 3.18 | -1.5  |
| 10000 | <chem>CC(=O)N(C)C=C</chem>         | C03860745 | -9.92 | -1.12 | -12.74 | 5.76 | -1.82 |

**SI Table 4:** The top 10,000 molecule docking list for used for hit picking in this report. The molecules are listed by their rank, SMILES string, ZINC ID and total docking score. The individual components of the docking score (electrostatics, van der Waals, polar desolvation and non-polar desolvation scores) are also provided. SMILES are given of the molecule at pH 7.0, although docking was performed using species present from pH 4.0 – 8.0 and the scored tautomer may not be the one present at pH 7.0.

### **SI References:**

1. Merski, M.; Shoichet, B. K., Engineering a model protein cavity to catalyze the Kemp elimination. *P Natl Acad Sci USA* **2012**, *109* (40), 16179-16183.
2. Morton, A.; Matthews, B. W., Specificity of Ligand-Binding in a Buried Nonpolar Cavity of T4 Lysozyme - Linkage of Dynamics and Structural Plasticity. *Biochemistry* **1995**, *34* (27), 8576-8588.
3. Liu, L. J.; Marwitz, A. J. V.; Matthews, B. W.; Liu, S. Y., Boron Mimetics: 1,2-Dihydro-1,2-azaborines Bind inside a Nonpolar Cavity of T4 Lysozyme. *Angew Chem Int Edit* **2009**, *48* (37), 6817-6819.
4. Graves, A. P.; Shivakumar, D. M.; Boyce, S. E.; Jacobson, M. P.; Case, D. A.; Shoichet, B. K., Rescoring docking hit lists for model cavity sites: Predictions and experimental testing. *J Mol Biol* **2008**, *377* (3), 914-934.
5. <http://www.molinspiration.com>.
